# Supplementary material for: Profilin 1 Controls a Microglial Cytoskeleton Checkpoint to Prevent Senescence and Premature Synaptic Decline
Source: Research Square preprint supplement (doi:10.21203/rs.3.rs-6666431/v1), 2025-08-27
Supplement: Supplementary file 1 [file 432e41eeabec4f7e572c5355.xlsx]

## Sheet: Human Ageing vs Pfn1 Orthologue
ID	flfl cre+ Avg (log2)	flfl Avg (log2)	Fold Change	P-val	FDR P-val	Gene Symbol	Description		Human vs Pfn1 Orthologues			By Fold Change
Gdf3	7,3	0,11	145,95	8,63E-07	0,0007	Gdf3			TNIP3			Top 5 Upregulated	Sample Signals (log2)
Cxcr4	8,38	1,25	140	5,17E-06	0,0013	Cxcr4			PSTPIP1				fl/fl	fl/fl	fl/fl	fl/fl Cre+	fl/fl Cre+	fl/fl Cre+
Tlr8	7,2	0,11	136,45	2,84E-07	0,0005	Tlr8			CXCR4			Cxcr4	1,22	1,02	1,79	8,13	8,68	8,35
Ms4a4a	7,37	0,31	133,68	2,26E-07	0,0005	Ms4a4a			SLC4A8			Ms4a4a	0,53	0,29	0,12	7,27	7,36	7,5
Clec12a	7,35	0,55	111,83	3,58E-07	0,0005	Clec12a			NFIA			Itgal	0,8	0,53	1,31	7,54	7,45	7,28
Ms4a7	7,14	0,37	108,8	2,44E-07	0,0005	Ms4a7			PTPN22			Runx3	0,29	0	0,12	6,67	6,36	6,31
Itgal	7,43	0,84	96,25	3,92E-06	0,0011	Itgal			RUNX3			Emilin1	1,68	2,34	1,55	6,07	6,06	5,95
Cybb	8,24	1,68	93,89	5,77E-05	0,0044	Cybb			BAHCC1
Apoe	11,07	4,62	87,24	1,31E-09	3,13E-05	Apoe			PARP16			Top 5 Downregulated	Sample Signals (log2)
Runx3	6,33	0,13	73,67	4,18E-07	0,0006	Runx3			CECR2				fl/fl	fl/fl	fl/fl	fl/fl Cre+	fl/fl Cre+	fl/fl Cre+
Klra2	6,36	0,18	72,36	6,32E-07	0,0007	Klra2			EMILIN1			Rgs7bp	4,81	4,87	4,62	2,42	2,67	2,7
Ifi203	6,46	0,37	67,88	3,45E-08	0,0003	Ifi203			AHNAK			Tmc7	7,38	7,1	7,14	5,3	5,22	5,11
Plbd1	6,2	0,27	60,71	9,12E-07	0,0007	Plbd1			IL18BP			Tmem204	6,41	6,05	5,94	4,35	4,67	4,35
Mndal	6,21	0,29	60,7	4,78E-07	0,0006	Mndal			GNAO1			Dlc1	2,77	2,36	2,58	1,27	0,93	1,08
Cyp4f18	6,44	0,76	51,04	2,41E-06	0,0009	Cyp4f18			MILR1			Adgra3	4,84	4,67	4,56	3,45	3,53	3,16
Ms4a14	5,66	0	50,64	4,28E-06	0,0012	Ms4a14			RIC3
Siglec1	8,42	2,83	48,16	4,68E-05	0,0039	Siglec1			FSTL5
Serpinb8	5,67	0,11	47,2	1,50E-06	0,0008	Serpinb8			CMYA5			By FDR
H2-Eb1	8,66	3,15	45,54	3,85E-05	0,0034	H2-Eb1			RILPL1			Top 10	Sample Signals (log2)
Slamf7	5,73	0,25	44,79	2,30E-05	0,0027	Slamf7			ATP2B2				fl/fl 1	fl/fl 2	fl/fl	fl/fl Cre+	fl/fl Cre+	fl/fl Cre+
Itga4	6,75	1,35	42,26	4,55E-06	0,0012	Itga4			EPS15			Ms4a4a	0,53	0,29	0,12	7,27	7,36	7,5
Pf4	7,06	1,71	40,97	4,69E-08	0,0003	Pf4			KALRN			Nfia	7,29	7,24	7,26	6,31	6,33	6,35
H2-Aa	8,27	2,96	39,67	8,51E-05	0,0056	H2-Aa			NEGR1			Runx3	0,29	0	0,12	6,67	6,36	6,31
Pla2g7	6,92	1,65	38,76	1,34E-05	0,0021	Pla2g7			NEFL			Trps1	2,13	2,03	1,96	6,23	6,3	6,04
Cmah	5,4	0,21	36,5	1,68E-07	0,0005	Cmah			SPATS2L			Kcnn4	3,67	3,92	3,81	6,83	6,67	6,77
Myof	5,42	0,26	35,7	2,37E-06	0,0009	Myof			LRIG1			Pstpip1	2,9	2,89	2,74	5,67	5,73	5,48
Ptger4	6,8	1,66	35,19	1,98E-06	0,0008	Ptger4			RIMS1			Itgal	0,8	0,53	1,31	7,54	7,45	7,28
Axl	9,19	4,07	34,88	0,0001	0,0065	Axl			VEGFA			Cxcr4	1,22	1,02	1,79	8,13	8,68	8,35
Sorbs3	6,85	1,75	34,26	1,29E-06	0,0008	Sorbs3			SHANK3			Milr1	5,44	5,54	5,65	7,36	7,2	7,31
Ahr	5,38	0,29	34	2,52E-06	0,0009	Ahr			RPH3A			Iqgap1	3,49	3,75	3,79	6,68	6,43	6,42
Cd36	5,41	0,34	33,73	1,40E-06	0,0008	Cd36			ADGRE5
Ctse	5,92	0,86	33,4	2,12E-08	0,0003	Ctse			TLN2
Ehd1	6,66	1,8	29,01	2,71E-06	0,0009	Ehd1			NTRK2
Vcam1	7,61	2,77	28,64	8,28E-05	0,0054	Vcam1			MS4A4A
Cd74	10,82	6,1	26,46	9,85E-06	0,0018	Cd74			MEX3A
Ccnd2	5,35	0,67	25,66	3,96E-05	0,0035	Ccnd2			TFAP4
Cp	5,3	0,67	24,75	9,15E-07	0,0007	Cp			C2
Oas2	7,59	2,98	24,43	0,0024	0,0387	Oas2			UTP6
AI607873	7,14	2,54	24,25	0,0009	0,0205	AI607873			ATP2B4
Adam19	5,19	0,62	23,7	1,36E-05	0,0021	Adam19			P2RX1
Cd93	4,55	0	23,42	5,78E-07	0,0007	Cd93			CCDC85C
Mrc1	8,67	4,15	22,93	2,63E-06	0,0009	Mrc1			TFPI
Pydc4	6,01	1,52	22,41	0,0038	0,0509	Pydc4			MED12L
Emilin1	6,07	1,62	21,83	3,00E-05	0,0030	Emilin1			KANK2
Lyz2	12,77	8,37	21,17	1,54E-06	0,0008	Lyz2			PLPP1
H2-Ab1	8,15	3,76	20,98	6,21E-05	0,0046	H2-Ab1			DLC1
Ifi44	4,5	0,15	20,32	0,0016	0,0298	Ifi44			SEMA4A
Jag1	5,35	1,03	20,01	8,26E-07	0,0007	Jag1			DDO
Igf1	5,17	0,94	18,7	6,26E-06	0,0014	Igf1			PLVAP
Reps2	5,05	0,86	18,34	3,70E-06	0,0011	Reps2			PLPPR4
Trps1	6,21	2,04	18,04	4,22E-07	0,0006	Trps1			HOXB7
Aoah	4,52	0,48	16,48	7,76E-05	0,0052	Aoah			RGS7BP
F630028O10Rik	5,05	1,02	16,31	1,13E-05	0,0019	F630028O10Rik			TMC7
C3	5,85	1,83	16,28	0,0004	0,0131	C3			ITGAL
Oas1g	5,41	1,41	16	0,0010	0,0232	Oas1g			PSD3
Cdc42bpg	5,61	1,64	15,68	7,26E-05	0,0050	Cdc42bpg			LZTS2
Lgals1	5,98	2,03	15,45	1,28E-06	0,0008	Lgals1			LILRA4	lilra5	pirb
Dach1	4,06	0,11	15,43	9,85E-06	0,0018	Dach1			TMEM204
Acp5	4,29	0,35	15,36	1,36E-05	0,0021	Acp5			ENPP4
Gpr65	5,92	1,99	15,22	1,78E-05	0,0024	Gpr65			NDST1
Cpne2	5,65	1,73	15,17	9,47E-07	0,0007	Cpne2			MFSD6
Oas3	4,97	1,07	14,91	0,0086	0,0832	Oas3			NRP1
Ccr1	7,44	3,55	14,86	9,75E-06	0,0018	Ccr1			ZNF454	zfp454
Clec4n	3,88	0	14,72	4,55E-06	0,0012	Clec4n			PDLIM7
Stap1	4,06	0,2	14,5	1,49E-06	0,0008	Stap1			CHST1
Cd300lf	6,76	2,91	14,45	0,0002	0,0085	Cd300lf			MORN1
Gpr31b	5,04	1,29	13,52	0,0001	0,0071	Gpr31b			PPARG
Dram1	4,54	0,79	13,44	1,91E-06	0,0008	Dram1			PLXNC1
Arhgap15	5,99	2,25	13,39	3,76E-06	0,0011	Arhgap15			MS4A6A	ms4a6c	ms4a6b
Iqgap2	4,38	0,69	12,95	7,40E-05	0,0051	Iqgap2			ASAP3
Antxr2	4,49	0,79	12,91	1,87E-05	0,0025	Antxr2			CHL1
Vnn3	3,69	0	12,88	3,08E-07	0,0005	Vnn3			PLEKHG3
Clec2i	4,79	1,1	12,84	1,56E-05	0,0022	Clec2i			TREML4
Pdpn	3,77	0,11	12,61	2,73E-05	0,0029	Pdpn			MRC2
Sirpb1b	3,65	0	12,54	9,08E-08	0,0004	Sirpb1b			SEMA7A
Nlrc4	3,75	0,11	12,47	1,13E-05	0,0019	Nlrc4			PRRT3
Thbd	3,76	0,12	12,41	8,81E-06	0,0017	Thbd			IRF4
Tmem221	7,01	3,38	12,39	5,31E-07	0,0006	Tmem221			CCDC149
Ciita	4,14	0,61	11,55	0,0007	0,0179	Ciita			PDPN
Fgf2	6,28	2,79	11,21	6,23E-05	0,0046	Fgf2			CD163
Qpct	4,54	1,07	11,05	1,74E-06	0,0008	Qpct			ADGRB3
Rara	3,98	0,54	10,85	4,03E-06	0,0011	Rara			DSCAM
Slc2a6	6,06	2,64	10,71	0,0001	0,0073	Slc2a6			SLC5A5
Sash1	4,94	1,52	10,68	2,79E-05	0,0030	Sash1			IQGAP1
Sh3pxd2b	4,67	1,27	10,54	1,87E-06	0,0008	Sh3pxd2b			ARAP2
Ch25h	3,75	0,36	10,48	9,57E-06	0,0018	Ch25h			ETS1
Mdfic	5,93	2,55	10,44	2,99E-06	0,0010	Mdfic			TEC
Emilin2	3,74	0,41	9,99	5,79E-06	0,0014	Emilin2			FAM189A2
Dab2	8,71	5,4	9,92	2,41E-05	0,0028	Dab2			DOCK5
Tmem51	3,5	0,19	9,9	6,80E-05	0,0049	Tmem51			TNFAIP2
Itsn1	6,52	3,23	9,78	0,0001	0,0064	Itsn1			RASAL2
BC064078	5,15	1,89	9,6	8,28E-07	0,0007	BC064078			KCNB1
Fgl2	7,51	4,3	9,29	0,0001	0,0068	Fgl2			RGS10
Cd40	5,25	2,04	9,25	0,0012	0,0257	Cd40			RIMS2
Nlrc3	4,2	0,99	9,25	8,49E-06	0,0017	Nlrc3			APOC4-APOC2	Apoc4
Cd72	8,15	4,96	9,17	7,97E-05	0,0053	Cd72			PFN1
Tnfsf8	5,7	2,54	8,93	1,70E-05	0,0023	Tnfsf8			TMEM132B
Plxnc1	4,37	1,23	8,8	2,82E-05	0,0030	Plxnc1			TRPS1
Adgrg5	3,61	0,49	8,7	6,58E-05	0,0047	Adgrg5			TGFBI
Slit1	4,18	1,06	8,7	3,64E-05	0,0034	Slit1			KCNN4
Itgb8	4,15	1,04	8,61	3,75E-05	0,0034	Itgb8			JPH3
Cd44	5,34	2,24	8,6	0,0003	0,0115	Cd44			ADGRA3
Cxcl14	3,71	0,6	8,59	0,0008	0,0204	Cxcl14			KLRD1
Spp1	5,51	2,41	8,55	0,0003	0,0112	Spp1
Gas7	4,59	1,49	8,53	2,52E-05	0,0028	Gas7
Xdh	3,6	0,53	8,44	2,41E-05	0,0028	Xdh
Unc119	3,28	0,23	8,31	4,26E-06	0,0012	Unc119
Oasl1	4,12	1,07	8,27	0,0048	0,0592	Oasl1
C920009B18Rik	4,59	1,54	8,26	9,34E-06	0,0018	C920009B18Rik
Ifnlr1	3,23	0,18	8,24	0,0002	0,0081	Ifnlr1
H2-Q6	8	4,98	8,11	0,0061	0,0682	H2-Q6
Runx2	3,76	0,75	8,08	5,45E-05	0,0043	Runx2
Sh2d1b1	4,14	1,13	8,04	1,62E-05	0,0022	Sh2d1b1
Myo5a	7,78	4,78	8,02	9,95E-06	0,0018	Myo5a
Bhlhe40	5,2	2,2	7,99	2,44E-05	0,0028	Bhlhe40
Gsn	5,36	2,37	7,94	1,83E-06	0,0008	Gsn
Kcnn4	6,76	3,8	7,78	1,41E-06	0,0008	Kcnn4
H2-Q7	5,61	2,67	7,69	0,0054	0,0635	H2-Q7
Hcar2	4,2	1,28	7,56	0,0016	0,0296	Hcar2
Ifi204	4,86	1,95	7,49	0,0005	0,0145	Ifi204
Plxnd1	4,64	1,74	7,49	5,98E-05	0,0044	Plxnd1
Col14a1	2,9	0	7,46	0,0001	0,0072	Col14a1
Scimp	6,33	3,45	7,37	4,57E-06	0,0012	Scimp
Gm33058	2,98	0,1	7,37	9,27E-07	0,0007	Gm33058
F13a1	4,27	1,41	7,23	0,0005	0,0152	F13a1
Slc28a2	2,84	0	7,18	1,18E-05	0,0019	Slc28a2
Zmynd15	6,4	3,59	7	0,0002	0,0098	Zmynd15
Ccl2	5,8	3	6,96	0,0003	0,0107	Ccl2
Fxyd5	6,81	4,02	6,91	5,23E-05	0,0042	Fxyd5
Cdkn2a	3,17	0,39	6,89	6,93E-05	0,0049	Cdkn2a
P2ry14	2,88	0,1	6,84	5,70E-05	0,0043	P2ry14
Ms4a4c	4,51	1,75	6,82	0,0002	0,0080	Ms4a4c
Pstpip1	5,66	2,9	6,78	2,12E-06	0,0008	Pstpip1
Mgst1	2,88	0,14	6,68	0,0002	0,0099	Mgst1
Lox	4,53	1,8	6,63	0,0004	0,0132	Lox
Cxcl16	9,5	6,78	6,61	2,01E-05	0,0026	Cxcl16
Kcnab2	4,6	1,89	6,58	0,0001	0,0067	Kcnab2
Mllt4	6,2	3,48	6,57	0,0001	0,0070	Mllt4
Clec7a	9,02	6,31	6,55	1,02E-05	0,0018	Clec7a
Tmem205	5,46	2,75	6,54	3,73E-05	0,0034	Tmem205
Cyfip2	5,29	2,58	6,54	6,22E-05	0,0046	Cyfip2
Slfn4	2,69	0	6,44	5,61E-06	0,0013	Slfn4
Nedd9	4,65	1,96	6,44	4,89E-05	0,0040	Nedd9
Fam110b	2,92	0,24	6,44	6,91E-06	0,0015	Fam110b
Rai14	4,62	1,96	6,32	1,08E-05	0,0018	Rai14
Iqgap1	6,42	3,77	6,3	8,74E-06	0,0017	Iqgap1
Ccl12	8,59	5,94	6,28	0,0032	0,0456	Ccl12
Vim	4,6	1,95	6,25	1,26E-05	0,0020	Vim
Bst1	3,36	0,73	6,23	0,0038	0,0507	Bst1
Ms4a6c	8,27	5,64	6,18	4,63E-05	0,0039	Ms4a6c
C630043F03Rik	3,08	0,46	6,17	8,73E-05	0,0057	C630043F03Rik
Hip1	4,78	2,2	5,98	8,79E-05	0,0057	Hip1
Clec4d	2,56	0	5,89	0,0002	0,0082	Clec4d
Pde7b	2,65	0,1	5,85	7,59E-07	0,0007	Pde7b
Kcna3	6,64	4,09	5,84	0,0003	0,0110	Kcna3
LOC102639543	3,3	0,75	5,84	0,0018	0,0323	LOC102639543
Kalrn	4,51	2	5,7	0,0176	0,1314	Kalrn
Hs3st1	2,92	0,4	5,7	0,0016	0,0298	Hs3st1
Ldlrad3	3,6	1,1	5,66	1,35E-05	0,0021	Ldlrad3
Gm1966	5,56	3,07	5,63	0,0001	0,0069	Gm1966
Adam33	2,7	0,22	5,61	0,0006	0,0174	Adam33
Ascl4	2,68	0,2	5,6	3,01E-06	0,0010	Ascl4
AI504432	5,27	2,78	5,6	2,15E-05	0,0026	AI504432
Cd300ld	3,46	0,98	5,55	0,0003	0,0111	Cd300ld
Xylt1	5,43	2,97	5,5	0,0002	0,0096	Xylt1
Clic4	7,56	5,11	5,48	6,91E-05	0,0049	Clic4
Folr2	4,19	1,74	5,45	0,0001	0,0073	Folr2
Tgfbi	9,55	7,1	5,45	1,07E-05	0,0018	Tgfbi
C030034L19Rik	3,15	0,71	5,43	0,0002	0,0078	C030034L19Rik
Kynu	3,85	1,41	5,43	7,84E-05	0,0053	Kynu
Pltp	5,76	3,33	5,42	8,22E-05	0,0054	Pltp
Pdlim7	4,35	1,92	5,42	0,0018	0,0322	Pdlim7
Serpinb6b	3,03	0,6	5,37	2,12E-05	0,0026	Serpinb6b
Bst2	9,09	6,67	5,36	5,07E-05	0,0042	Bst2
Lrig1	3,09	0,67	5,35	0,0010	0,0228	Lrig1
Zbp1	4,54	2,13	5,34	0,0059	0,0670	Zbp1
Zc3h12d	2,8	0,39	5,31	0,0002	0,0099	Zc3h12d
St3gal1	5,4	2,99	5,31	6,99E-05	0,0049	St3gal1
Bmp2	2,4	0	5,29	2,31E-05	0,0027	Bmp2
Fam132a	3,42	1,02	5,28	0,0003	0,0102	Fam132a
Gpr132	2,64	0,24	5,25	0,0026	0,0402	Gpr132
Mmp9	2,39	0	5,24	0,0086	0,0833	Mmp9
Hepacam2	2,38	0	5,19	9,49E-05	0,0059	Hepacam2
Pdcd1	7,47	5,09	5,19	4,65E-05	0,0039	Pdcd1
Fzd7	4,71	2,35	5,15	8,27E-06	0,0017	Fzd7
Msr1	2,35	0	5,12	2,78E-05	0,0030	Msr1
Rftn1	6,16	3,81	5,11	4,50E-05	0,0038	Rftn1
Ccl7	2,74	0,39	5,1	0,0003	0,0124	Ccl7
Grap2	2,35	0	5,09	8,01E-05	0,0053	Grap2
Map4k1	4,17	1,83	5,08	3,28E-05	0,0032	Map4k1
Wfdc17	3,5	1,16	5,08	6,33E-05	0,0046	Wfdc17
LOC100038947	2,33	0	5,03	0,0004	0,0135	LOC100038947
Vill	3,85	1,52	5,01	3,37E-05	0,0032	Vill
Cd200r4	3,73	1,41	5	3,68E-05	0,0034	Cd200r4
Metrnl	5,46	3,14	4,96	6,03E-06	0,0014	Metrnl
Spic	2,3	0	4,94	9,83E-06	0,0018	Spic
Arhgap10	3,54	1,24	4,93	0,0004	0,0135	Arhgap10
Cdkn1a	6,77	4,47	4,9	0,0003	0,0105	Cdkn1a
Ptpn22	4,95	2,66	4,89	5,82E-05	0,0044	Ptpn22
Batf2	3,58	1,29	4,89	0,0011	0,0246	Batf2
Slfn1	2,33	0,05	4,86	0,0009	0,0217	Slfn1
Gdpd5	6,02	3,74	4,84	2,12E-05	0,0026	Gdpd5
Hgf	4,07	1,8	4,83	0,0002	0,0082	Hgf
Slc26a11	4,85	2,58	4,82	9,35E-05	0,0059	Slc26a11
Gm10791	2,36	0,1	4,79	9,63E-05	0,0060	Gm10791
Chac1	2,86	0,6	4,79	0,0034	0,0478	Chac1
Sh3d19	2,9	0,65	4,77	0,0011	0,0245	Sh3d19
Pxdc1	7,14	4,89	4,73	3,97E-06	0,0011	Pxdc1
Gk	4,22	1,98	4,73	3,84E-05	0,0034	Gk
Fam214a	6,63	4,39	4,73	5,54E-05	0,0043	Fam214a
AW112010	6,7	4,46	4,71	4,26E-05	0,0036	AW112010
Vav3	2,23	0	4,69	0,0002	0,0083	Vav3
Sh3bp4	4,01	1,79	4,68	0,0001	0,0070	Sh3bp4
Psd3	3,78	1,56	4,67	0,0004	0,0127	Psd3
Cd69	2,41	0,2	4,64	0,0008	0,0192	Cd69
Ezr	4,82	2,62	4,61	5,63E-05	0,0043	Ezr
Kank2	5,82	3,62	4,6	0,0001	0,0065	Kank2
Oasl2	7,27	5,07	4,6	0,0073	0,0761	Oasl2
Cyp4f17	3,57	1,39	4,54	3,69E-05	0,0034	Cyp4f17
Kcnh4	4,15	1,98	4,51	0,0005	0,0156	Kcnh4
Sestd1	3,11	0,94	4,51	0,0007	0,0190	Sestd1
Usp18	4,82	2,66	4,46	0,0080	0,0803	Usp18
Itgax	7,56	5,42	4,42	0,0016	0,0305	Itgax
Bcar3	3,48	1,34	4,41	0,0017	0,0314	Bcar3
2310001H17Rik	3,8	1,66	4,41	0,0011	0,0245	2310001H17Rik
Stom	7,22	5,1	4,35	6,28E-07	0,0007	Stom
Syne1	3,93	1,81	4,35	0,0015	0,0288	Syne1
Ifi27l2a	4,99	2,88	4,33	0,0015	0,0289	Ifi27l2a
Tmem150b	3,72	1,61	4,31	0,0004	0,0139	Tmem150b
Gab3	5,44	3,33	4,31	0,0007	0,0176	Gab3
Rgs18	2,22	0,11	4,31	3,24E-06	0,0010	Rgs18
Lrrc8c	4,54	2,43	4,3	3,99E-05	0,0035	Lrrc8c
Ctla2b	5,68	3,58	4,3	1,85E-06	0,0008	Ctla2b
Zfp599	2,2	0,1	4,28	3,48E-06	0,0010	Zfp599
Itga8	2,73	0,64	4,26	2,43E-05	0,0028	Itga8
Kcnj10	7,16	5,08	4,25	5,13E-05	0,0042	Kcnj10
Apoc4	2,08	0	4,24	4,64E-05	0,0039	Apoc4
Plppr2	4,14	2,06	4,23	0,0013	0,0259	Plppr2
Tmem82	4,95	2,88	4,22	2,06E-06	0,0008	Tmem82
Tnik	3,6	1,53	4,21	0,0032	0,0459	Tnik
Cd38	2,18	0,11	4,2	0,0002	0,0086	Cd38
Snhg11	6,88	4,81	4,19	0,0218	0,1496	Snhg11
Mcam	3,7	1,63	4,19	1,60E-05	0,0022	Mcam
Tmem8	3,14	1,08	4,15	1,02E-05	0,0018	Tmem8
Etl4	3,59	1,54	4,14	0,0004	0,0131	Etl4
Nostrin	2,16	0,11	4,14	0,0013	0,0259	Nostrin
Emb	2,44	0,4	4,13	0,0063	0,0697	Emb
Alcam	2,71	0,66	4,12	0,0005	0,0149	Alcam
LOC102632465	2,96	0,91	4,12	0,0015	0,0287	LOC102632465
Gm32448	2,41	0,37	4,11	0,0005	0,0144	Gm32448
Fam65b	5,64	3,61	4,1	2,75E-06	0,0009	Fam65b
Il1b	4,43	2,4	4,08	0,0039	0,0513	Il1b
Gpx3	2,57	0,54	4,07	6,44E-05	0,0047	Gpx3
Nlrc5	6,08	4,05	4,07	0,0006	0,0165	Nlrc5
Pxylp1	2,87	0,85	4,06	0,0003	0,0121	Pxylp1
Slc1a5	4,14	2,13	4,03	0,0002	0,0080	Slc1a5
Tmem176a	9,26	7,26	4,01	2,64E-05	0,0029	Tmem176a
Cst7	3,96	1,97	4	0,0065	0,0706	Cst7
Aph1b	4,05	2,06	3,99	1,74E-05	0,0024	Aph1b
Cd244	4,08	2,08	3,99	0,0011	0,0238	Cd244
Cmpk2	4,79	2,79	3,98	0,0190	0,1378	Cmpk2
Cxcr3	3,54	1,55	3,98	3,27E-05	0,0032	Cxcr3
Apobec1	6,67	4,68	3,96	0,0002	0,0076	Apobec1
Miat	4,48	2,49	3,96	0,0120	0,1030	Miat
C1qtnf1	2,33	0,35	3,95	0,0013	0,0260	C1qtnf1
Anxa2	2,95	0,97	3,95	0,0010	0,0225	Anxa2
Maff	3,06	1,08	3,94	0,0152	0,1187	Maff
Arhgap6	2,46	0,49	3,92	0,0010	0,0226	Arhgap6
Gpnmb	2,07	0,1	3,92	0,0029	0,0431	Gpnmb
Lgals3	3,17	1,21	3,91	0,0038	0,0510	Lgals3
Fap	2,37	0,4	3,9	0,0001	0,0065	Fap
Zbtb16	2,56	0,6	3,9	0,0024	0,0381	Zbtb16
Pcgf2	4,84	2,88	3,9	4,25E-05	0,0036	Pcgf2
Plxna1	5,49	3,53	3,9	0,0002	0,0100	Plxna1
Fos	2,82	0,87	3,87	4,56E-06	0,0012	Fos
Cerkl	2,34	0,39	3,87	3,85E-05	0,0034	Cerkl
Lyz1	2,19	0,24	3,86	0,0013	0,0265	Lyz1
Atrnl1	3,93	1,98	3,85	0,0003	0,0105	Atrnl1
Ahnak	2,34	0,4	3,85	0,0029	0,0432	Ahnak
Dnase1l1	4,75	2,8	3,85	3,08E-05	0,0031	Dnase1l1
St8sia4	6,38	4,44	3,83	8,18E-05	0,0054	St8sia4
Hoxb3	2,34	0,41	3,82	0,0004	0,0135	Hoxb3
Phf11a	3,73	1,8	3,81	0,0099	0,0911	Phf11a
Lrrc16a	4,47	2,54	3,81	0,0008	0,0199	Lrrc16a
Trerf1	3,11	1,19	3,8	9,84E-06	0,0018	Trerf1
Mob3b	2,61	0,68	3,8	0,0020	0,0343	Mob3b
Rasgrp1	3,34	1,41	3,8	0,0002	0,0099	Rasgrp1
Gm39888	2,03	0,1	3,79	0,0002	0,0087	Gm39888
Ifitm6	1,92	0	3,77	0,0194	0,1397	Ifitm6
Tnip3	2,02	0,11	3,74	0,0003	0,0110	Tnip3
Nt5e	2,24	0,33	3,74	0,0028	0,0418	Nt5e
Oas1a	5,83	3,93	3,74	0,0012	0,0250	Oas1a
Rsad2	2,87	0,97	3,72	0,0151	0,1181	Rsad2
Mcemp1	2,28	0,4	3,7	1,84E-05	0,0024	Mcemp1
Bcl3	5,27	3,39	3,68	0,0017	0,0317	Bcl3
Etv4	3,34	1,46	3,67	0,0005	0,0144	Etv4
B3gnt8	5,7	3,82	3,67	0,0002	0,0079	B3gnt8
H2-Q5	7,19	5,32	3,65	0,0020	0,0343	H2-Q5
Stard13	1,87	0	3,65	0,0001	0,0062	Stard13
Trpv4	5,78	3,93	3,6	0,0010	0,0220	Trpv4
Bend4	2,13	0,29	3,6	5,63E-05	0,0043	Bend4
Rnf43	1,96	0,11	3,59	5,14E-05	0,0042	Rnf43
Tk1	3,47	1,63	3,58	0,0067	0,0722	Tk1
Meg3	8,18	6,34	3,58	0,0228	0,1546	Meg3
Asgr2	3,84	2	3,56	0,0012	0,0250	Asgr2
Stxbp6	2,35	0,53	3,55	2,26E-05	0,0027	Stxbp6
Arl5c	6,61	4,78	3,55	0,0020	0,0336	Arl5c
Shtn1	3,29	1,46	3,54	0,0005	0,0143	Shtn1
Irf7	6,47	4,65	3,53	0,0137	0,1113	Irf7
Cd4	1,93	0,12	3,51	0,0004	0,0126	Cd4
Tle1	4,57	2,76	3,49	7,48E-05	0,0051	Tle1
Fcho1	3,96	2,17	3,48	0,0005	0,0145	Fcho1
Galc	6,88	5,08	3,47	5,35E-06	0,0013	Galc
Lrp8	3,21	1,42	3,47	0,0061	0,0682	Lrp8
Fbxw17	3,88	2,08	3,47	0,0034	0,0471	Fbxw17
Aifm3	3,28	1,49	3,46	0,0260	0,1675	Aifm3
Pfkp	3,83	2,04	3,45	5,55E-05	0,0043	Pfkp
Plekhg1	2,1	0,31	3,45	0,0116	0,1009	Plekhg1
Chp2	1,96	0,18	3,44	0,0003	0,0115	Chp2
Cpne6	2,3	0,53	3,43	0,0071	0,0747	Cpne6
Frmd6	2,9	1,13	3,42	0,0008	0,0205	Frmd6
Mx1	5,03	3,26	3,42	0,0188	0,1363	Mx1
4833411C07Rik	6	4,24	3,4	0,0007	0,0185	4833411C07Rik
Gpr176	1,96	0,2	3,4	0,0001	0,0069	Gpr176
Mmp25	2,72	0,96	3,39	0,0038	0,0511	Mmp25
Tm4sf5	1,97	0,21	3,38	0,0003	0,0105	Tm4sf5
Milr1	7,3	5,54	3,38	7,71E-06	0,0016	Milr1
Lmna	4,79	3,04	3,36	7,00E-05	0,0049	Lmna
H2-K1	11,41	9,66	3,36	0,0012	0,0251	H2-K1
Gapt	1,74	0	3,35	3,54E-05	0,0033	Gapt
Creg2	3,09	1,35	3,34	6,24E-06	0,0014	Creg2
Anln	3,4	1,66	3,34	0,0017	0,0312	Anln
Phlda3	2,34	0,6	3,33	0,0023	0,0376	Phlda3
Olfr98	1,83	0,1	3,32	0,0064	0,0701	Olfr98
Tespa1	1,73	0	3,32	0,0003	0,0117	Tespa1
Nceh1	6,62	4,89	3,31	2,21E-06	0,0009	Nceh1
Dse	6,59	4,87	3,31	3,34E-05	0,0032	Dse
Rxrg	3,71	1,98	3,31	0,0009	0,0205	Rxrg
Ccl8	1,72	0	3,3	0,0030	0,0439	Ccl8
Anxa5	7,16	5,45	3,28	1,66E-05	0,0023	Anxa5
Plekhg3	2,24	0,53	3,27	0,0019	0,0330	Plekhg3
Gm35522	4,15	2,44	3,26	0,0062	0,0691	Gm35522
Tjp3	2,52	0,81	3,26	0,0016	0,0303	Tjp3
Il1rn	2,18	0,48	3,26	0,0006	0,0162	Il1rn
Lpcat4	3,61	1,91	3,25	0,0006	0,0168	Lpcat4
Trim59	2,96	1,26	3,25	0,0036	0,0498	Trim59
Car13	2,39	0,69	3,24	0,0004	0,0131	Car13
Celf3	3,84	2,15	3,24	0,0055	0,0643	Celf3
Crip1	3,82	2,13	3,23	0,0015	0,0287	Crip1
H2-Bl	3,67	1,98	3,23	0,0005	0,0144	H2-Bl
Stbd1	4,69	3,01	3,22	0,0003	0,0115	Stbd1
Fcgr4	6,01	4,33	3,2	0,0019	0,0335	Fcgr4
Cd52	9,3	7,63	3,19	2,36E-05	0,0028	Cd52
Zc2hc1a	3,16	1,49	3,19	1,31E-05	0,0021	Zc2hc1a
Kcnt1	3,09	1,42	3,18	0,0246	0,1622	Kcnt1
Htra3	6,85	5,18	3,17	1,89E-05	0,0025	Htra3
Acvrl1	7,06	5,39	3,17	2,04E-06	0,0008	Acvrl1
Nfxl1	7,73	6,07	3,17	2,98E-05	0,0030	Nfxl1
Slc41a2	1,94	0,27	3,17	0,0003	0,0110	Slc41a2
Capn1	6,4	4,74	3,15	0,0002	0,0078	Capn1
Fam20c	3,09	1,43	3,15	0,0011	0,0242	Fam20c
Gabbr2	4,73	3,07	3,15	0,0056	0,0651	Gabbr2
Mpp1	6,77	5,11	3,15	2,97E-05	0,0030	Mpp1
Sdc3	9,12	7,47	3,13	0,0001	0,0070	Sdc3
Anxa1	1,85	0,2	3,13	0,0251	0,1642	Anxa1
Car9	3,05	1,4	3,12	0,0007	0,0189	Car9
Apoc1	1,94	0,31	3,11	0,0001	0,0064	Apoc1
4930455G09Rik	1,84	0,2	3,11	7,44E-05	0,0051	4930455G09Rik
Clec2d	8,45	6,82	3,11	7,07E-08	0,0003	Clec2d
Rgs11	2,94	1,3	3,11	0,0028	0,0425	Rgs11
Cep170b	4,53	2,9	3,11	0,0014	0,0274	Cep170b
Myo10	3,11	1,47	3,11	0,0098	0,0908	Myo10
Hsf4	1,95	0,31	3,1	0,0039	0,0518	Hsf4
Pigz	5,04	3,41	3,1	1,61E-06	0,0008	Pigz
Clec10a	1,98	0,35	3,09	0,0003	0,0117	Clec10a
Soat2	5,21	3,58	3,09	0,0014	0,0274	Soat2
Mapt	2,99	1,37	3,08	0,0069	0,0739	Mapt
Acod1	2,06	0,44	3,07	0,0070	0,0739	Acod1
H2-Q4	7,14	5,52	3,06	0,0007	0,0186	H2-Q4
Arhgef3	4,64	3,03	3,06	0,0001	0,0071	Arhgef3
Pde10a	3,99	2,38	3,06	0,0004	0,0133	Pde10a
B4galnt4	3,78	2,17	3,05	0,0064	0,0701	B4galnt4
Pyhin1	5,14	3,54	3,05	0,0212	0,1470	Pyhin1
Eps8	3,77	2,16	3,04	0,0043	0,0549	Eps8
Eml2	3,79	2,18	3,04	2,37E-05	0,0028	Eml2
Cyp4f16	5,2	3,6	3,04	3,28E-05	0,0032	Cyp4f16
Ly9	4,97	3,37	3,03	0,0063	0,0698	Ly9
S1pr2	5,31	3,71	3,03	7,38E-05	0,0051	S1pr2
Bzrap1	3,6	2	3,03	0,0196	0,1403	Bzrap1
Arpp21	4,06	2,46	3,03	0,0196	0,1403	Arpp21
Fgd1	1,89	0,3	3,02	0,0005	0,0147	Fgd1
Ikbke	2,67	1,07	3,02	0,0294	0,1818	Ikbke
Ddo	1,59	0	3,02	0,0008	0,0196	Ddo
Fam212b	2,62	1,03	3,01	5,60E-05	0,0043	Fam212b
Sema4a	4,07	2,48	3	0,0002	0,0081	Sema4a
Sdc4	6,91	5,33	2,99	7,89E-07	0,0007	Sdc4
Ubxn11	3,5	1,93	2,98	0,0002	0,0096	Ubxn11
H2-D1	10,92	9,34	2,98	0,0019	0,0329	H2-D1
Tsku	1,57	0	2,98	0,0006	0,0169	Tsku
Slfn5	5,03	3,46	2,97	0,0318	0,1904	Slfn5
Nrbp2	4,75	3,18	2,96	0,0039	0,0515	Nrbp2
Slc14a1	4,92	3,36	2,96	0,0006	0,0162	Slc14a1
Cbr2	3,02	1,46	2,96	0,0019	0,0335	Cbr2
Ntng2	2,97	1,41	2,95	0,0083	0,0821	Ntng2
Krt80	2,07	0,52	2,94	0,0007	0,0189	Krt80
Csf2ra	9,06	7,51	2,93	0,0002	0,0082	Csf2ra
Alpk1	5,13	3,58	2,93	0,0002	0,0095	Alpk1
Mmp14	7,69	6,14	2,93	2,47E-07	0,0005	Mmp14
Xylt2	7,02	5,47	2,92	3,93E-05	0,0035	Xylt2
Kcnq2	3,78	2,23	2,92	0,0114	0,0995	Kcnq2
Spats2l	1,82	0,28	2,92	0,0002	0,0091	Spats2l
Cdca7l	3	1,45	2,92	0,0036	0,0497	Cdca7l
1700003E16Rik	2,61	1,06	2,92	0,0067	0,0721	1700003E16Rik
Plk3	6,87	5,32	2,91	0,0021	0,0348	Plk3
Gm30189	3,4	1,85	2,91	0,0011	0,0243	Gm30189
Aph1c	3,65	2,12	2,9	0,0058	0,0667	Aph1c
Lilra5	6,97	5,43	2,9	0,0007	0,0180	Lilra5
Ctsc	9,43	7,9	2,89	9,32E-05	0,0059	Ctsc
Cox6b2	3	1,47	2,89	2,15E-05	0,0026	Cox6b2
Kif27	2,3	0,77	2,89	0,0052	0,0622	Kif27
Igsf9	4,82	3,3	2,87	8,97E-05	0,0058	Igsf9
Bambi-ps1	1,78	0,26	2,87	0,0004	0,0136	Bambi-ps1
Sp100	6,59	5,07	2,87	0,0008	0,0200	Sp100
Sh3bgrl	4,46	2,94	2,86	0,0024	0,0387	Sh3bgrl
N4bp3	2,27	0,76	2,85	0,0020	0,0345	N4bp3
Glipr1	6,03	4,52	2,85	2,12E-05	0,0026	Glipr1
AF529169	2,73	1,23	2,84	0,0002	0,0089	AF529169
Lrrk2	1,61	0,1	2,84	0,0013	0,0265	Lrrk2
Fbn2	1,5	0	2,84	3,09E-05	0,0031	Fbn2
Hdac7	3,71	2,21	2,83	9,45E-05	0,0059	Hdac7
Dlgap2	2,8	1,3	2,82	0,0273	0,1729	Dlgap2
Fut4	4,31	2,81	2,82	0,0007	0,0186	Fut4
Slc2a3	4,87	3,37	2,82	3,40E-05	0,0032	Slc2a3
Sgsh	7,24	5,75	2,81	3,28E-05	0,0032	Sgsh
Adgrb3	3,57	2,08	2,81	0,0297	0,1830	Adgrb3
Aldh1b1	2,6	1,11	2,81	0,0006	0,0168	Aldh1b1
Rab3d	4,41	2,92	2,8	0,0004	0,0138	Rab3d
Nfkbiz	7,94	6,46	2,8	0,0004	0,0126	Nfkbiz
Rarg	3,26	1,77	2,79	0,0016	0,0303	Rarg
Fuom	4,26	2,78	2,79	0,0002	0,0092	Fuom
Ldlr	6,14	4,66	2,79	0,0009	0,0215	Ldlr
Slamf9	7,88	6,4	2,78	1,57E-06	0,0008	Slamf9
Gcm2	1,75	0,28	2,77	0,0001	0,0065	Gcm2
Gm6904	3,13	1,66	2,77	0,0014	0,0281	Gm6904
Dgkg	2,58	1,11	2,77	0,0093	0,0873	Dgkg
Prrg1	1,67	0,2	2,77	5,25E-05	0,0042	Prrg1
Chic1	3,28	1,81	2,77	0,0002	0,0082	Chic1
Fgr	4,74	3,28	2,76	0,0005	0,0152	Fgr
2500002B13Rik	3,16	1,7	2,75	0,0036	0,0491	2500002B13Rik
Dnase1l3	2,19	0,73	2,75	0,0032	0,0462	Dnase1l3
Chrm3	3,12	1,67	2,74	0,0200	0,1417	Chrm3
Cpd	7,34	5,89	2,74	0,0003	0,0108	Cpd
Ptpn7	2,23	0,78	2,73	0,0024	0,0378	Ptpn7
Sik1	3,48	2,03	2,73	0,0017	0,0316	Sik1
Mfsd6	2,56	1,12	2,72	0,0148	0,1171	Mfsd6
Egr1	5,44	3,99	2,72	0,0015	0,0294	Egr1
Slc38a6	8,08	6,64	2,71	3,49E-05	0,0033	Slc38a6
F830208F22Rik	3,13	1,69	2,71	0,0004	0,0128	F830208F22Rik
Tnfsf13b	7,91	6,47	2,71	0,0003	0,0124	Tnfsf13b
Foxred2	1,96	0,53	2,7	0,0009	0,0206	Foxred2
Csrp1	4,37	2,94	2,69	1,10E-06	0,0008	Csrp1
Dnm1	5,38	3,95	2,69	0,0255	0,1658	Dnm1
Gpr162	5,42	4	2,68	0,0003	0,0115	Gpr162
Pstpip2	3,1	1,69	2,67	0,0042	0,0544	Pstpip2
Stk39	2,47	1,06	2,66	0,0051	0,0608	Stk39
Osbpl10	2,67	1,26	2,65	0,0133	0,1094	Osbpl10
Ak8	1,51	0,1	2,65	0,0001	0,0073	Ak8
Nfib	2,34	0,94	2,65	0,0092	0,0866	Nfib
Htatip2	4,07	2,66	2,64	0,0009	0,0208	Htatip2
Sqle	3,4	2	2,64	0,0011	0,0244	Sqle
F630111L10Rik	1,76	0,36	2,63	4,11E-05	0,0036	F630111L10Rik
Fam189a2	1,49	0,1	2,62	1,02E-05	0,0018	Fam189a2
Gria1	3,7	2,31	2,62	0,0261	0,1682	Gria1
Aqp9	1,39	0	2,62	0,0001	0,0070	Aqp9
Haus8	5,43	4,05	2,62	0,0001	0,0071	Haus8
Zdhhc23	1,71	0,33	2,62	0,0090	0,0853	Zdhhc23
Rab36	3,09	1,71	2,61	0,0039	0,0513	Rab36
Tnf	2,04	0,66	2,61	0,0130	0,1080	Tnf
Rnf217	1,75	0,37	2,61	0,0013	0,0267	Rnf217
Slc25a24	1,38	0	2,6	0,0004	0,0138	Slc25a24
Cntnap1	4,16	2,78	2,6	0,0086	0,0835	Cntnap1
Ccdc159	1,8	0,42	2,59	0,0110	0,0973	Ccdc159
Cdr2	2,84	1,47	2,59	0,0025	0,0393	Cdr2
Fas	2,36	0,99	2,59	0,0012	0,0257	Fas
Tnni3	4,63	3,26	2,59	7,82E-05	0,0053	Tnni3
Pgap1	3,75	2,38	2,59	0,0021	0,0350	Pgap1
P4ha2	2,3	0,93	2,58	0,0005	0,0156	P4ha2
Atp1a3	8,26	6,89	2,58	0,0006	0,0162	Atp1a3
Chd5	2,87	1,5	2,58	0,0333	0,1958	Chd5
Fgf14	2,1	0,74	2,58	0,0008	0,0192	Fgf14
Pim1	5,18	3,82	2,57	0,0142	0,1142	Pim1
Ngef	2,55	1,19	2,57	0,0237	0,1584	Ngef
E2f1	3,67	2,31	2,57	0,0008	0,0202	E2f1
Lpl	6,53	5,17	2,56	0,0002	0,0080	Lpl
Grm5	3,87	2,52	2,56	0,0088	0,0846	Grm5
Crym	1,55	0,2	2,56	0,0014	0,0280	Crym
Tmem178b	3,25	1,89	2,56	0,0221	0,1515	Tmem178b
Masp1	4,15	2,79	2,56	0,0007	0,0189	Masp1
Mgat5b	2,17	0,82	2,55	0,0115	0,1003	Mgat5b
Hist1h3d	5,16	3,82	2,55	0,0119	0,1026	Hist1h3d
Best1	2,86	1,51	2,54	8,86E-05	0,0057	Best1
H2-DMb2	6,02	4,67	2,54	0,0002	0,0098	H2-DMb2
Gria2	4,6	3,26	2,53	0,0336	0,1967	Gria2
Ptprt	2,8	1,46	2,52	0,0157	0,1215	Ptprt
Rnf150	6,52	5,19	2,51	0,0001	0,0067	Rnf150
Dennd2d	2,69	1,36	2,51	0,0008	0,0195	Dennd2d
Slc4a3	3,23	1,91	2,5	0,0010	0,0231	Slc4a3
Hacd4	6,76	5,44	2,5	0,0008	0,0196	Hacd4
Asns	2,37	1,05	2,5	0,0046	0,0581	Asns
Aldh2	7,57	6,25	2,5	2,31E-06	0,0009	Aldh2
Chst1	6,67	5,35	2,49	0,0012	0,0259	Chst1
Txndc16	7,27	5,95	2,49	0,0002	0,0082	Txndc16
Plau	8,37	7,06	2,49	0,0014	0,0277	Plau
Sptbn1	6,47	5,16	2,48	0,0002	0,0096	Sptbn1
Trim55	1,31	0	2,48	0,0004	0,0130	Trim55
AI662270	2,1	0,79	2,48	0,0014	0,0277	AI662270
Acsl3	3,69	2,39	2,47	7,41E-06	0,0016	Acsl3
Trpm2	6,74	5,44	2,47	0,0001	0,0071	Trpm2
Blvrb	5,62	4,32	2,47	1,98E-05	0,0026	Blvrb
Emp3	6,6	5,3	2,47	5,97E-05	0,0044	Emp3
Ccr2	3,31	2,01	2,47	0,0010	0,0232	Ccr2
Rtcb	8,9	7,6	2,46	4,39E-05	0,0037	Rtcb
Grin2a	4,06	2,77	2,46	0,0234	0,1573	Grin2a
Rab11fip4	3,49	2,2	2,45	0,0004	0,0125	Rab11fip4
Tmbim1	6,05	4,75	2,45	0,0002	0,0097	Tmbim1
Pgbd5	2,42	1,14	2,44	0,0243	0,1611	Pgbd5
Pqlc3	3,84	2,55	2,44	0,0041	0,0538	Pqlc3
Cyb5r1	6,68	5,4	2,44	0,0001	0,0071	Cyb5r1
Ralgds	4,71	3,43	2,43	0,0009	0,0217	Ralgds
Chpf	2,61	1,33	2,43	0,0041	0,0537	Chpf
Fbxl2	1,84	0,56	2,42	0,0048	0,0589	Fbxl2
Fam161a	3,44	2,17	2,41	0,0009	0,0217	Fam161a
Dgat2	2,13	0,86	2,41	0,0045	0,0571	Dgat2
Adap1	6,29	5,02	2,41	1,24E-05	0,0020	Adap1
Arpin	2,06	0,8	2,41	1,46E-05	0,0022	Arpin
St8sia1	4,44	3,18	2,41	0,0245	0,1616	St8sia1
Cntnap5a	2,03	0,76	2,4	0,0264	0,1692	Cntnap5a
Wwp1	6,46	5,19	2,4	0,0001	0,0070	Wwp1
Kcnk10	1,84	0,59	2,39	0,0009	0,0211	Kcnk10
Clec4b1	1,26	0	2,39	0,0018	0,0323	Clec4b1
Gm36284	1,63	0,37	2,39	0,0081	0,0809	Gm36284
Ptprn2	3,5	2,25	2,39	0,0011	0,0241	Ptprn2
Sigirr	1,82	0,56	2,39	0,0217	0,1492	Sigirr
Grm4	3,11	1,85	2,39	0,0178	0,1319	Grm4
Samd12	2,51	1,26	2,39	0,0187	0,1357	Samd12
Ppfibp1	4,35	3,09	2,38	0,0002	0,0094	Ppfibp1
Bcl2	4,02	2,76	2,38	0,0007	0,0179	Bcl2
P2ry2	2,44	1,19	2,38	5,32E-05	0,0042	P2ry2
Fam19a2	1,69	0,44	2,37	0,0011	0,0245	Fam19a2
Ntrk2	3,89	2,64	2,37	0,0050	0,0607	Ntrk2
Ccdc102a	5,3	4,05	2,37	0,0002	0,0096	Ccdc102a
Sstr4	2,39	1,15	2,37	0,0022	0,0361	Sstr4
Kctd17	4,1	2,86	2,36	7,46E-06	0,0016	Kctd17
Pvt1	5,75	4,51	2,36	0,0047	0,0588	Pvt1
Prr5l	5,99	4,75	2,36	0,0015	0,0291	Prr5l
Marveld1	4,42	3,18	2,36	0,0005	0,0156	Marveld1
Ppargc1a	1,35	0,11	2,36	0,0292	0,1811	Ppargc1a
Sh3rf3	1,61	0,37	2,36	0,0305	0,1855	Sh3rf3
Piwil2	1,65	0,41	2,36	0,0039	0,0515	Piwil2
Tenm4	2,68	1,44	2,36	0,0303	0,1849	Tenm4
Tmcc2	4,18	2,95	2,35	0,0023	0,0376	Tmcc2
Rap2b	3,08	1,85	2,34	0,0089	0,0849	Rap2b
Tmem261	5,8	4,57	2,34	0,0004	0,0134	Tmem261
Hivep2	3,5	2,27	2,34	0,0012	0,0251	Hivep2
Ulbp1	2,39	1,17	2,34	0,0012	0,0258	Ulbp1
Krt7	1,52	0,3	2,33	0,0129	0,1073	Krt7
Fam131b	2,42	1,2	2,33	0,0029	0,0430	Fam131b
Rnf213	6,05	4,83	2,33	0,0110	0,0972	Rnf213
St8sia6	4,43	3,21	2,33	0,0012	0,0258	St8sia6
Hoxb4	4,45	3,23	2,33	0,0025	0,0394	Hoxb4
Dok2	1,98	0,77	2,33	0,0064	0,0702	Dok2
Synpo	1,93	0,71	2,32	0,0006	0,0169	Synpo
Dnajb13	1,42	0,21	2,31	0,0007	0,0186	Dnajb13
Ms4a6b	7,03	5,82	2,31	1,75E-05	0,0024	Ms4a6b
Gcat	3,03	1,82	2,31	0,0102	0,0928	Gcat
Gla	4,44	3,24	2,3	0,0002	0,0087	Gla
Tmem176b	10,59	9,39	2,3	5,28E-05	0,0042	Tmem176b
Syt8	1,93	0,74	2,29	0,0019	0,0329	Syt8
H2-T-ps	1,88	0,68	2,29	0,0002	0,0078	H2-T-ps
Wdr54	1,98	0,78	2,29	0,0082	0,0814	Wdr54
Galnt3	5,35	4,15	2,29	0,0003	0,0117	Galnt3
Cd63	9,58	8,39	2,29	0,0001	0,0071	Cd63
Nfasc	3,78	2,59	2,28	0,0269	0,1714	Nfasc
F730043M19Rik	3,17	1,99	2,27	0,0030	0,0441	F730043M19Rik
6530402F18Rik	5,03	3,85	2,27	0,0012	0,0255	6530402F18Rik
Csmd1	1,86	0,68	2,27	0,0021	0,0346	Csmd1
Ablim2	3,66	2,48	2,27	0,0171	0,1289	Ablim2
Celsr3	2,2	1,02	2,26	0,0132	0,1091	Celsr3
Adgb	1,67	0,49	2,26	0,0120	0,1029	Adgb
Unc13a	2,91	1,73	2,26	0,0033	0,0470	Unc13a
Slfn3	3,28	2,1	2,26	0,0134	0,1100	Slfn3
Stard10	1,75	0,58	2,26	0,0044	0,0563	Stard10
Dgkb	2,39	1,21	2,25	0,0016	0,0305	Dgkb
Dpf1	2,23	1,06	2,25	0,0149	0,1173	Dpf1
Lmtk3	4,22	3,05	2,25	0,0239	0,1594	Lmtk3
Cox6a2	3,48	2,31	2,25	0,0027	0,0414	Cox6a2
Lingo2	1,33	0,16	2,25	0,0244	0,1613	Lingo2
Lrguk	4,11	2,94	2,25	0,0005	0,0151	Lrguk
Dnajb14	5,94	4,77	2,24	9,83E-05	0,0061	Dnajb14
Actr3b	1,98	0,82	2,24	0,0186	0,1356	Actr3b
Sorl1	6,88	5,72	2,24	0,0001	0,0069	Sorl1
Efr3b	2,77	1,61	2,23	0,0087	0,0842	Efr3b
Pqlc1	4,96	3,8	2,23	5,88E-06	0,0014	Pqlc1
Lancl2	3,05	1,89	2,23	0,0004	0,0131	Lancl2
Mir8120	1,35	0,19	2,23	0,0046	0,0580	Mir8120
Cenpe	2,02	0,87	2,23	0,0165	0,1262	Cenpe
Osgin1	5,31	4,16	2,22	0,0002	0,0078	Osgin1
Grin1	4,7	3,55	2,22	0,0009	0,0207	Grin1
Ifnar1	8,44	7,29	2,22	0,0004	0,0132	Ifnar1
Slfn2	7,1	5,94	2,22	0,0017	0,0316	Slfn2
Limd1	4,82	3,67	2,22	0,0001	0,0067	Limd1
Nrcam	2,97	1,82	2,22	0,0106	0,0951	Nrcam
Cadm2	2,93	1,78	2,22	0,0251	0,1642	Cadm2
Rtp4	7,33	6,18	2,22	0,0164	0,1254	Rtp4
A130077B15Rik	3,61	2,47	2,22	0,0075	0,0772	A130077B15Rik
Slc44a1	6,34	5,2	2,21	5,90E-05	0,0044	Slc44a1
Coro6	4,2	3,06	2,21	0,0045	0,0570	Coro6
Akr1c13	2,18	1,03	2,21	0,0065	0,0709	Akr1c13
Rcor2	1,83	0,69	2,21	0,0032	0,0456	Rcor2
Ppp3cc	3,67	2,53	2,21	0,0079	0,0800	Ppp3cc
D17H6S56E-5	7,38	6,24	2,2	0,0008	0,0195	D17H6S56E-5
Mvb12a	5,18	4,04	2,2	0,0002	0,0100	Mvb12a
Mocos	1,34	0,2	2,2	0,0025	0,0389	Mocos
Ntng1	2,35	1,21	2,2	0,0007	0,0190	Ntng1
Tmprss4	1,48	0,34	2,2	0,0106	0,0952	Tmprss4
LOC108168196	1,33	0,2	2,2	0,0049	0,0594	LOC108168196
Nyap2	2,86	1,73	2,2	0,0057	0,0662	Nyap2
Jdp2	5,46	4,32	2,2	0,0011	0,0241	Jdp2
Inf2	4,39	3,26	2,19	0,0249	0,1633	Inf2
Rasgrp2	1,58	0,44	2,19	0,0135	0,1103	Rasgrp2
Ahrr	3,43	2,3	2,19	0,0012	0,0250	Ahrr
Tm4sf19	1,24	0,11	2,19	0,0045	0,0571	Tm4sf19
F3	2,13	1	2,18	0,0157	0,1213	F3
Aifm2	2,04	0,92	2,18	0,0004	0,0129	Aifm2
LOC108167440	3,44	2,31	2,18	0,0110	0,0976	LOC108167440
Lrrc4b	1,97	0,85	2,18	0,0005	0,0150	Lrrc4b
Stx3	2,88	1,76	2,18	0,0007	0,0183	Stx3
Neurl1b	4,44	3,32	2,18	0,0025	0,0396	Neurl1b
Fsd2	1,12	0	2,18	0,0001	0,0071	Fsd2
Capn2	4,23	3,12	2,17	0,0002	0,0100	Capn2
Ier3	2,55	1,44	2,17	0,0038	0,0508	Ier3
Coro2b	2,21	1,09	2,17	0,0139	0,1128	Coro2b
Clstn3	4,19	3,07	2,16	0,0118	0,1020	Clstn3
Disp2	3,18	2,07	2,16	0,0059	0,0670	Disp2
Col20a1	2,24	1,13	2,15	0,0080	0,0803	Col20a1
Slc25a10	5,81	4,7	2,15	0,0012	0,0256	Slc25a10
Irs2	6,3	5,21	2,14	0,0024	0,0387	Irs2
H2-DMa	8	6,9	2,14	3,35E-05	0,0032	H2-DMa
Foxp4	5,38	4,29	2,14	7,47E-05	0,0051	Foxp4
6030443J06Rik	1,63	0,54	2,14	0,0069	0,0732	6030443J06Rik
Pard6g	1,2	0,11	2,13	0,0235	0,1578	Pard6g
Pparg	1,09	0	2,13	0,0038	0,0507	Pparg
Dpp7	6,25	5,16	2,13	0,0008	0,0202	Dpp7
H2-K2	3,97	2,88	2,13	0,0005	0,0144	H2-K2
Sptbn4	1,69	0,6	2,12	0,0123	0,1046	Sptbn4
Tbc1d8	7,76	6,67	2,12	0,0002	0,0092	Tbc1d8
Prkar1b	6,5	5,41	2,12	0,0001	0,0063	Prkar1b
Plin3	5,94	4,85	2,12	0,0001	0,0074	Plin3
C3ar1	9,33	8,25	2,12	5,70E-05	0,0043	C3ar1
Cd5l	2,13	1,05	2,12	0,0057	0,0662	Cd5l
Cd83	5,43	4,35	2,12	0,0048	0,0589	Cd83
Gpr183	7,18	6,1	2,11	1,76E-06	0,0008	Gpr183
Lrtm2	2,21	1,13	2,11	0,0021	0,0349	Lrtm2
Cep128	3,7	2,62	2,11	0,0029	0,0432	Cep128
Agbl4	1,54	0,47	2,1	0,0162	0,1242	Agbl4
Il18bp	3,6	2,53	2,1	0,0003	0,0105	Il18bp
Sptbn2	2,84	1,77	2,1	0,0120	0,1031	Sptbn2
Cysltr2	1,07	0	2,09	0,0006	0,0169	Cysltr2
LOC105246186	1,07	0	2,09	0,0042	0,0539	LOC105246186
Sez6l	4	2,93	2,09	0,0002	0,0086	Sez6l
Cfp	2,99	1,93	2,09	0,0002	0,0089	Cfp
Gramd1b	6,25	5,18	2,09	0,0004	0,0131	Gramd1b
Tpst1	5,59	4,52	2,09	0,0001	0,0075	Tpst1
Tmeff1	1,77	0,7	2,09	0,0284	0,1777	Tmeff1
Zfp704	5,32	4,26	2,09	0,0057	0,0659	Zfp704
Diaph1	7,37	6,31	2,09	0,0026	0,0402	Diaph1
Ptger2	1,17	0,11	2,09	0,0023	0,0366	Ptger2
Brsk2	1,26	0,2	2,09	0,0210	0,1455	Brsk2
Ppargc1b	3,21	2,15	2,09	0,0155	0,1204	Ppargc1b
Ctla2a	1,3	0,24	2,08	0,0133	0,1093	Ctla2a
Plin2	7,36	6,3	2,08	0,0004	0,0137	Plin2
Lrfn4	1,66	0,6	2,08	0,0010	0,0231	Lrfn4
Mpzl3	1,57	0,51	2,08	0,0005	0,0154	Mpzl3
Gm34483	1,17	0,11	2,08	0,0028	0,0419	Gm34483
Fras1	1,72	0,67	2,08	0,0053	0,0632	Fras1
Lgals3bp	10,17	9,11	2,08	0,0062	0,0691	Lgals3bp
Cabyr	2,04	0,99	2,08	0,0253	0,1650	Cabyr
Fam213a	3,46	2,41	2,08	0,0144	0,1148	Fam213a
Gm35113	1,5	0,45	2,08	0,0176	0,1310	Gm35113
Slc22a18	1,67	0,62	2,08	0,0021	0,0346	Slc22a18
St7	4,63	3,57	2,08	0,0037	0,0507	St7
Gstm1	4,07	3,02	2,08	0,0003	0,0118	Gstm1
Ppp1r1a	1,27	0,22	2,07	0,0035	0,0483	Ppp1r1a
Rec8	1,35	0,3	2,07	0,0001	0,0070	Rec8
Rbbp8	4,09	3,04	2,07	0,0019	0,0330	Rbbp8
Coro7	7,49	6,44	2,07	1,18E-06	0,0008	Coro7
Sap30	4,41	3,36	2,07	1,39E-06	0,0008	Sap30
Nme4	3,2	2,16	2,07	0,0003	0,0108	Nme4
Otub2	3,7	2,65	2,07	0,0079	0,0798	Otub2
Gpd2	3,51	2,46	2,06	0,0004	0,0125	Gpd2
Cercam	4,04	3	2,06	0,0043	0,0547	Cercam
Fpr1	1,04	0	2,06	5,32E-05	0,0042	Fpr1
Cxcl2	1,04	0	2,06	0,0036	0,0498	Cxcl2
Lrfn5	2,25	1,21	2,06	0,0318	0,1905	Lrfn5
Gm12250	6,37	5,33	2,05	0,0048	0,0591	Gm12250
Dbn1	2,79	1,76	2,05	0,0223	0,1521	Dbn1
Flt1	2,03	0,99	2,05	0,0020	0,0343	Flt1
H2-M3	6,33	5,3	2,05	0,0173	0,1297	H2-M3
Rhof	3,03	1,99	2,05	0,0086	0,0835	Rhof
Syt1	3,56	2,52	2,05	0,0236	0,1578	Syt1
Hoxb7	1,03	0	2,05	2,41E-05	0,0028	Hoxb7
Scn3b	1,76	0,73	2,05	0,0015	0,0287	Scn3b
Exoc3l4	2,42	1,39	2,05	0,0233	0,1565	Exoc3l4
Astn2	2,6	1,57	2,04	0,0149	0,1173	Astn2
LOC108167568	1,82	0,79	2,04	0,0148	0,1169	LOC108167568
Cdk18	2,28	1,25	2,04	0,0160	0,1232	Cdk18
Akap6	3,06	2,04	2,04	0,0310	0,1876	Akap6
Gnptab	6,82	5,8	2,03	0,0008	0,0196	Gnptab
Gm33046	1,22	0,2	2,03	0,0009	0,0217	Gm33046
Col6a1	2,63	1,61	2,03	0,0227	0,1540	Col6a1
C2	1,67	0,65	2,03	0,0068	0,0726	C2
Nrp1	7,67	6,65	2,02	0,0026	0,0402	Nrp1
Slc35e4	3,88	2,86	2,02	0,0013	0,0264	Slc35e4
Wscd2	2,92	1,9	2,02	0,0035	0,0483	Wscd2
Cd300lb	2,3	1,29	2,02	0,0025	0,0390	Cd300lb
Dna2	2,92	1,91	2,02	0,0016	0,0303	Dna2
Mdk	2,45	1,44	2,02	0,0134	0,1099	Mdk
Hapln2	1,96	0,95	2,02	0,0091	0,0860	Hapln2
Otud7a	2,09	1,07	2,02	0,0011	0,0240	Otud7a
LOC108167784	1,48	0,47	2,02	0,0034	0,0472	LOC108167784
Vegfa	3,14	2,13	2,02	0,0307	0,1862	Vegfa
Gdap10	5,42	4,41	2,01	0,0053	0,0627	Gdap10
Wdr31	2	0,99	2,01	0,0072	0,0754	Wdr31
Grik2	3,31	2,3	2,01	0,0230	0,1550	Grik2
Haao	5,94	4,94	2	0,0011	0,0238	Haao
Zfp810	5,19	4,19	2	0,0057	0,0662	Zfp810
Nr2f1	1,48	0,48	2	0,0244	0,1613	Nr2f1
Srxn1	2,39	1,39	2	0,0047	0,0583	Srxn1
Gucy1a3	1,12	0,12	2	0,0003	0,0112	Gucy1a3
Slc4a10	1,64	0,64	2	0,0335	0,1963	Slc4a10
Nphp4	1,57	0,57	2	0,0186	0,1356	Nphp4
Pilra	6,5	5,51	2	0,0003	0,0105	Pilra
Plxna2	1,97	0,97	2	0,0153	0,1195	Plxna2
Rasgrf1	3,02	2,03	2	0,0005	0,0144	Rasgrf1
Cckbr	1,88	0,88	1,99	0,0240	0,1598	Cckbr
Irak3	4,46	3,46	1,99	0,0025	0,0388	Irak3
Gm14379	1,11	0,11	1,99	0,0013	0,0272	Gm14379
Hdac9	6,12	5,14	1,98	0,0001	0,0067	Hdac9
Enpp4	6,26	5,28	1,98	0,0038	0,0510	Enpp4
Lmtk2	2,76	1,78	1,98	0,0080	0,0801	Lmtk2
Igfbp4	6,58	5,59	1,97	0,0003	0,0106	Igfbp4
Ccdc120	1,53	0,56	1,97	0,0102	0,0928	Ccdc120
Tnfrsf11a	9	8,02	1,97	0,0001	0,0069	Tnfrsf11a
Foxn2	5,2	4,23	1,97	0,0011	0,0240	Foxn2
Kcnb1	2,69	1,72	1,96	0,0259	0,1672	Kcnb1
Kcna1	2,3	1,33	1,96	0,0171	0,1286	Kcna1
Il10	0,97	0	1,96	0,0026	0,0405	Il10
Cd163	2,26	1,29	1,96	0,0117	0,1015	Cd163
Atp10a	2,43	1,47	1,96	0,0129	0,1071	Atp10a
Syt6	2,93	1,96	1,96	0,0052	0,0620	Syt6
Cnksr2	2,36	1,4	1,95	0,0040	0,0528	Cnksr2
Icosl	8,06	7,09	1,95	0,0008	0,0191	Icosl
Bcl6	6,2	5,23	1,95	0,0013	0,0268	Bcl6
Hmox1	6,4	5,43	1,95	0,0001	0,0070	Hmox1
Slit2	1,08	0,12	1,95	0,0261	0,1683	Slit2
Mapkapk3	6,24	5,28	1,95	0,0009	0,0206	Mapkapk3
Incenp	5,44	4,47	1,95	0,0007	0,0176	Incenp
Lrp6	7,41	6,45	1,95	0,0016	0,0303	Lrp6
Gm26947	3,09	2,13	1,94	0,0074	0,0765	Gm26947
Vgf	2,91	1,96	1,94	0,0013	0,0270	Vgf
Prune2	2,05	1,09	1,94	0,0167	0,1267	Prune2
Fblim1	7,6	6,65	1,94	0,0002	0,0096	Fblim1
P2rx4	6,36	5,4	1,94	0,0003	0,0105	P2rx4
Athl1	4,65	3,69	1,94	0,0043	0,0549	Athl1
Cd274	5,27	4,31	1,94	2,59E-06	0,0009	Cd274
Lncpint	3,35	2,39	1,94	0,0063	0,0701	Lncpint
Fam234a	6,09	5,13	1,94	0,0019	0,0334	Fam234a
Rapgef3	1,78	0,82	1,94	0,0047	0,0586	Rapgef3
Spred3	3,23	2,28	1,93	0,0134	0,1098	Spred3
Tbc1d12	5,23	4,28	1,93	0,0015	0,0295	Tbc1d12
Tnip1	7,1	6,15	1,93	0,0015	0,0287	Tnip1
Stat2	6,84	5,9	1,93	0,0001	0,0065	Stat2
Spef2	1,58	0,64	1,93	0,0109	0,0966	Spef2
Nlgn1	1,69	0,75	1,93	0,0038	0,0512	Nlgn1
0610038B21Rik	1,31	0,37	1,92	0,0003	0,0121	0610038B21Rik
Pgap3	3,79	2,85	1,92	0,0013	0,0259	Pgap3
Adcy1	4,75	3,81	1,92	0,0114	0,1001	Adcy1
Gm15743	1,36	0,42	1,92	0,0257	0,1664	Gm15743
E2f2	2,62	1,68	1,92	0,0011	0,0242	E2f2
Igsf6	5,94	5,01	1,92	0,0150	0,1181	Igsf6
Ddx60	4,12	3,18	1,92	0,0077	0,0782	Ddx60
Eif4ebp1	5,04	4,11	1,91	0,0029	0,0430	Eif4ebp1
Asap2	1,61	0,67	1,91	0,0082	0,0816	Asap2
S100a1	2,59	1,65	1,91	0,0069	0,0738	S100a1
Ncam1	4,05	3,11	1,91	0,0304	0,1852	Ncam1
Rassf3	5,29	4,36	1,91	0,0042	0,0542	Rassf3
Synj2	7,04	6,11	1,91	0,0021	0,0350	Synj2
Npr2	2,33	1,39	1,91	0,0047	0,0586	Npr2
Slc26a10	1,61	0,67	1,91	0,0047	0,0584	Slc26a10
Hoxb6	0,93	0	1,91	6,33E-05	0,0046	Hoxb6
Smim24	4,81	3,88	1,91	0,0004	0,0139	Smim24
Akap3	0,93	0	1,91	0,0103	0,0936	Akap3
Slamf8	7,13	6,2	1,91	0,0090	0,0859	Slamf8
Lbh	5,86	4,93	1,91	0,0010	0,0225	Lbh
Ptrh1	1,37	0,44	1,91	0,0177	0,1316	Ptrh1
Adgrb2	3,79	2,85	1,91	0,0055	0,0648	Adgrb2
Pmepa1	7,63	6,7	1,91	0,0006	0,0162	Pmepa1
Alk	1,27	0,34	1,9	0,0243	0,1608	Alk
Atad2	3,3	2,37	1,9	0,0026	0,0402	Atad2
LOC108168817	2,26	1,33	1,9	0,0018	0,0328	LOC108168817
Stab1	10,87	9,94	1,9	0,0011	0,0240	Stab1
Marcksl1	3,19	2,27	1,9	0,0030	0,0437	Marcksl1
Tmem231	3,03	2,1	1,9	0,0016	0,0298	Tmem231
Nfe2	1,18	0,25	1,9	0,0133	0,1094	Nfe2
Bcl2l14	1,27	0,35	1,9	3,09E-05	0,0031	Bcl2l14
2900005J15Rik	3,86	2,94	1,89	0,0010	0,0233	2900005J15Rik
Nadk	8,92	8	1,89	0,0001	0,0065	Nadk
Parp11	6,23	5,31	1,89	0,0159	0,1226	Parp11
Iqcg	1,5	0,59	1,89	0,0071	0,0750	Iqcg
Slc15a3	8,5	7,59	1,89	0,0038	0,0508	Slc15a3
Cacfd1	4,89	3,98	1,89	0,0004	0,0140	Cacfd1
Mbnl2	4,11	3,19	1,89	0,0158	0,1221	Mbnl2
Abcc8	1,29	0,38	1,89	0,0010	0,0229	Abcc8
Crlf2	7,07	6,16	1,88	0,0060	0,0678	Crlf2
Dusp1	3,19	2,27	1,88	0,0007	0,0185	Dusp1
B4galnt1	7,69	6,78	1,88	1,67E-05	0,0023	B4galnt1
Tmem246	1,28	0,37	1,88	0,0323	0,1925	Tmem246
Olfr99	3,82	2,91	1,88	0,0172	0,1290	Olfr99
Atp8b4	0,91	0	1,88	0,0089	0,0853	Atp8b4
Fbxl21	2,93	2,02	1,88	0,0147	0,1168	Fbxl21
Stard4	2,49	1,58	1,88	0,0137	0,1116	Stard4
Shank3	2,01	1,1	1,88	0,0248	0,1633	Shank3
Tlr11	2,03	1,12	1,87	0,0067	0,0721	Tlr11
Cdc14b	4,52	3,61	1,87	0,0073	0,0761	Cdc14b
Cecr6	1,36	0,45	1,87	0,0002	0,0094	Cecr6
Atp2a1	1,02	0,11	1,87	0,0007	0,0180	Atp2a1
4930486L24Rik	3,07	2,16	1,87	0,0004	0,0136	4930486L24Rik
Ank	8,12	7,22	1,87	0,0002	0,0094	Ank
Atp9a	3,47	2,57	1,87	0,0082	0,0811	Atp9a
Tnfaip2	6,61	5,71	1,87	0,0021	0,0354	Tnfaip2
Sgsm1	1,71	0,81	1,87	0,0177	0,1318	Sgsm1
Fam135b	1,63	0,72	1,87	0,0050	0,0604	Fam135b
Cldn1	1,45	0,55	1,87	0,0007	0,0189	Cldn1
Tfec	2,51	1,61	1,87	0,0015	0,0289	Tfec
Rims2	1,69	0,79	1,87	0,0130	0,1081	Rims2
Mgl2	1,04	0,14	1,87	0,0243	0,1610	Mgl2
P4htm	2,94	2,04	1,87	0,0188	0,1363	P4htm
Tspan32	5,79	4,89	1,87	0,0018	0,0319	Tspan32
Tub	1,97	1,07	1,87	0,0012	0,0255	Tub
Hspa4l	3,02	2,12	1,87	0,0114	0,0997	Hspa4l
Znrf3	5,45	4,55	1,86	0,0020	0,0345	Znrf3
Gm1070	2,55	1,65	1,86	0,0255	0,1657	Gm1070
Atf5	2,26	1,36	1,86	0,0094	0,0883	Atf5
Tlr1	7,48	6,58	1,86	0,0012	0,0250	Tlr1
Olfm2	1,92	1,03	1,86	0,0168	0,1273	Olfm2
Hlx	2,81	1,91	1,86	0,0217	0,1492	Hlx
Rab11fip1	0,89	0	1,86	0,0003	0,0105	Rab11fip1
Tmem154	2,11	1,22	1,86	0,0229	0,1547	Tmem154
Kbtbd6	2,37	1,48	1,86	0,0311	0,1878	Kbtbd6
Ptprn	4,07	3,17	1,86	0,0304	0,1852	Ptprn
5430437J10Rik	0,89	0	1,86	0,0004	0,0125	5430437J10Rik
Ahnak2	1,32	0,43	1,86	0,0012	0,0250	Ahnak2
Svop	1,91	1,02	1,86	0,0020	0,0343	Svop
AA467197	0,89	0	1,85	0,0199	0,1411	AA467197
Il10rb	10,91	10,03	1,85	0,0001	0,0071	Il10rb
Pigs	7,88	7	1,84	0,0003	0,0111	Pigs
2010111I01Rik	4,58	3,7	1,84	0,0097	0,0899	2010111I01Rik
Chrna4	1,68	0,8	1,84	0,0020	0,0343	Chrna4
Ptpru	2,24	1,36	1,84	0,0004	0,0125	Ptpru
Gm34780	0,88	0	1,84	0,0003	0,0124	Gm34780
LOC108168394	1,43	0,55	1,84	0,0084	0,0825	LOC108168394
B430306N03Rik	6,18	5,3	1,84	0,0115	0,1005	B430306N03Rik
Ets2	3,87	3	1,83	0,0009	0,0211	Ets2
Ccrl2	5,56	4,68	1,83	0,0242	0,1603	Ccrl2
Rftn2	1,8	0,93	1,83	0,0008	0,0191	Rftn2
Rassf7	1,93	1,06	1,83	0,0157	0,1215	Rassf7
Ipw	2,14	1,27	1,83	0,0317	0,1903	Ipw
Fam129a	6,76	5,89	1,83	0,0078	0,0789	Fam129a
Cd22	6,78	5,91	1,83	0,0004	0,0137	Cd22
Ptpn5	2,52	1,66	1,83	0,0012	0,0253	Ptpn5
Srcin1	3,02	2,15	1,83	0,0173	0,1295	Srcin1
Mt3	3,46	2,59	1,83	0,0124	0,1049	Mt3
Slc4a8	2	1,13	1,82	0,0072	0,0757	Slc4a8
Relb	1,66	0,8	1,82	0,0040	0,0521	Relb
Tubb6	5,64	4,77	1,82	0,0003	0,0110	Tubb6
Kirrel3	1,9	1,04	1,82	0,0057	0,0661	Kirrel3
Atp2b4	2,72	1,86	1,82	0,0319	0,1907	Atp2b4
Ndst3	1,47	0,6	1,82	0,0053	0,0628	Ndst3
Nrros	4,97	4,11	1,82	0,0029	0,0426	Nrros
Spock2	3,97	3,11	1,82	0,0108	0,0959	Spock2
Slc17a7	4,44	3,58	1,82	0,0155	0,1204	Slc17a7
Edil3	2,13	1,27	1,82	0,0284	0,1776	Edil3
Ncapg2	2,29	1,43	1,81	0,0065	0,0709	Ncapg2
Cyth1	6,53	5,67	1,81	0,0030	0,0438	Cyth1
Diaph3	1,54	0,68	1,81	0,0054	0,0640	Diaph3
Wwtr1	2,27	1,41	1,81	0,0059	0,0670	Wwtr1
Slc7a1	5,58	4,73	1,81	0,0185	0,1350	Slc7a1
Mybl1	2,61	1,75	1,81	0,0256	0,1658	Mybl1
Gm12216	4,71	3,86	1,81	0,0246	0,1622	Gm12216
Klhl34	2,75	1,89	1,81	0,0340	0,1983	Klhl34
1110008P14Rik	2,22	1,37	1,81	0,0037	0,0498	1110008P14Rik
Dck	4,56	3,71	1,8	0,0034	0,0480	Dck
Tmem52	6,47	5,62	1,8	0,0003	0,0105	Tmem52
Chl1	3,26	2,41	1,8	0,0053	0,0630	Chl1
Smc4	3,68	2,83	1,8	0,0045	0,0571	Smc4
Prrt1	3,51	2,66	1,8	0,0168	0,1276	Prrt1
Smpdl3a	6,02	5,17	1,8	0,0003	0,0110	Smpdl3a
1700113A16Rik	2,9	2,05	1,8	0,0086	0,0833	1700113A16Rik
A330023F24Rik	3,34	2,49	1,8	0,0033	0,0467	A330023F24Rik
Eps15	7,33	6,49	1,8	0,0003	0,0121	Eps15
Rell2	3,45	2,61	1,8	0,0329	0,1946	Rell2
Adamts20	0,96	0,11	1,8	0,0167	0,1267	Adamts20
Atp2b2	5,33	4,48	1,8	0,0160	0,1229	Atp2b2
2610507B11Rik	8,3	7,45	1,8	0,0007	0,0188	2610507B11Rik
Rasgef1b	6,33	5,48	1,8	4,78E-06	0,0012	Rasgef1b
Gm32026	2,63	1,79	1,8	0,0199	0,1413	Gm32026
Acot9	5,81	4,96	1,8	0,0036	0,0497	Acot9
Pfkfb1	2,46	1,62	1,79	0,0202	0,1425	Pfkfb1
Ace	1,03	0,18	1,79	0,0221	0,1515	Ace
Ypel4	0,94	0,1	1,79	0,0069	0,0733	Ypel4
Atp6v1g2	3,33	2,48	1,79	0,0150	0,1178	Atp6v1g2
Crtap	6,94	6,1	1,79	9,35E-05	0,0059	Crtap
Ankrd28	4,08	3,24	1,79	0,0317	0,1900	Ankrd28
Pde8a	2,51	1,67	1,79	0,0008	0,0194	Pde8a
Gm20324	1,96	1,12	1,79	0,0039	0,0515	Gm20324
Tank	6,12	5,29	1,79	0,0050	0,0601	Tank
Lsamp	3,02	2,19	1,79	0,0041	0,0534	Lsamp
Tgfb3	1,37	0,54	1,79	0,0262	0,1683	Tgfb3
Hectd2	3,35	2,52	1,78	0,0003	0,0124	Hectd2
Dhx58	6,23	5,4	1,78	0,0038	0,0509	Dhx58
Pea15a	8,37	7,54	1,78	2,86E-05	0,0030	Pea15a
Slc6a9	4	3,17	1,78	0,0041	0,0538	Slc6a9
Cntn1	3,12	2,29	1,78	0,0086	0,0837	Cntn1
4931428F04Rik	2,04	1,21	1,78	0,0059	0,0670	4931428F04Rik
Sema6b	5,25	4,42	1,78	0,0002	0,0080	Sema6b
Pnkd	2,94	2,11	1,78	0,0052	0,0619	Pnkd
Col4a1	1,44	0,61	1,78	0,0022	0,0361	Col4a1
Gad1	2,25	1,42	1,78	0,0056	0,0653	Gad1
Gm5122	0,93	0,1	1,78	0,0120	0,1031	Gm5122
Ms4a4b	0,94	0,11	1,78	0,0036	0,0498	Ms4a4b
Wtip	4,98	4,15	1,78	0,0010	0,0228	Wtip
Sv2b	2,23	1,4	1,78	0,0175	0,1309	Sv2b
Ccdc69	1,73	0,9	1,78	0,0005	0,0144	Ccdc69
Nr1h3	1,9	1,07	1,78	0,0077	0,0781	Nr1h3
Dock5	1,04	0,21	1,77	0,0014	0,0273	Dock5
Smco4	2,52	1,69	1,77	0,0045	0,0572	Smco4
Pcsk2	3,15	2,32	1,77	0,0148	0,1169	Pcsk2
Gramd3	2,91	2,08	1,77	0,0059	0,0672	Gramd3
Dok4	1,9	1,07	1,77	0,0300	0,1839	Dok4
Erc1	3,32	2,49	1,77	0,0214	0,1479	Erc1
Ngfrap1	4,82	3,99	1,77	0,0005	0,0146	Ngfrap1
Sema6a	1,2	0,37	1,77	0,0155	0,1204	Sema6a
Usp13	0,93	0,1	1,77	0,0019	0,0334	Usp13
Uck2	3,63	2,81	1,77	0,0108	0,0965	Uck2
Hid1	1,61	0,79	1,77	0,0209	0,1452	Hid1
Slc22a15	1,04	0,22	1,77	0,0064	0,0705	Slc22a15
Creb5	2,31	1,5	1,76	0,0018	0,0322	Creb5
Nefl	2,69	1,87	1,76	0,0005	0,0154	Nefl
Slc45a1	2,07	1,26	1,76	0,0264	0,1690	Slc45a1
9330159F19Rik	1,96	1,14	1,76	0,0068	0,0729	9330159F19Rik
Syp	4,07	3,25	1,76	0,0120	0,1031	Syp
Nphp3	3,95	3,13	1,76	0,0012	0,0253	Nphp3
AA414768	2,66	1,85	1,76	0,0230	0,1551	AA414768
Rph3a	2,8	1,99	1,76	0,0090	0,0856	Rph3a
Kifc1	3,69	2,88	1,76	0,0205	0,1435	Kifc1
Tmem132a	4,85	4,03	1,76	0,0028	0,0425	Tmem132a
Tmem220	2,8	1,98	1,76	0,0188	0,1364	Tmem220
Cbarp	5,09	4,28	1,75	0,0121	0,1031	Cbarp
Gpld1	1,41	0,6	1,75	0,0096	0,0896	Gpld1
Pml	5,58	4,77	1,75	0,0003	0,0121	Pml
Fn1	1,35	0,55	1,75	0,0050	0,0604	Fn1
Zfp395	5,47	4,67	1,75	9,27E-05	0,0059	Zfp395
Fstl4	1,58	0,78	1,75	0,0184	0,1349	Fstl4
Mfsd7a	5,2	4,4	1,75	0,0019	0,0334	Mfsd7a
Abtb2	1,6	0,8	1,75	0,0121	0,1037	Abtb2
Treml4	1,86	1,05	1,74	0,0267	0,1707	Treml4
Enah	2,51	1,71	1,74	0,0304	0,1853	Enah
Rasa2	3,9	3,1	1,74	0,0004	0,0137	Rasa2
Tmem107	2,18	1,38	1,74	0,0323	0,1924	Tmem107
Gnao1	4	3,2	1,74	0,0313	0,1884	Gnao1
Mmp13	0,8	0	1,74	0,0032	0,0460	Mmp13
Kcnn1	2,29	1,49	1,74	0,0067	0,0719	Kcnn1
Rbms1	4,88	4,08	1,74	0,0047	0,0584	Rbms1
Lmntd2	1,91	1,11	1,74	0,0017	0,0315	Lmntd2
Man2a1	4,79	4	1,74	0,0005	0,0150	Man2a1
C5ar1	6,45	5,65	1,74	0,0014	0,0276	C5ar1
Snap25	3,26	2,46	1,74	0,0085	0,0827	Snap25
LOC102637283	0,8	0	1,74	0,0031	0,0449	LOC102637283
Kcnc1	3,41	2,61	1,73	0,0103	0,0936	Kcnc1
Cit	2,88	2,09	1,73	2,03E-05	0,0026	Cit
Mpdz	0,9	0,1	1,73	0,0254	0,1653	Mpdz
Esyt1	7,28	6,48	1,73	0,0001	0,0070	Esyt1
Plpp2	5,7	4,9	1,73	2,67E-06	0,0009	Plpp2
Batf	3,33	2,53	1,73	0,0040	0,0526	Batf
Dock6	4,89	4,1	1,73	0,0020	0,0340	Dock6
Alms1	3,47	2,68	1,73	0,0172	0,1293	Alms1
Irak1bp1	2,52	1,72	1,73	0,0049	0,0594	Irak1bp1
Tlr2	6,64	5,84	1,73	2,91E-05	0,0030	Tlr2
Cacng8	2,53	1,74	1,73	0,0199	0,1411	Cacng8
Gfra2	1,31	0,53	1,73	4,52E-05	0,0038	Gfra2
Plekhg5	5,06	4,27	1,73	0,0039	0,0515	Plekhg5
Prrt3	1,99	1,21	1,73	0,0002	0,0084	Prrt3
Negr1	1,73	0,94	1,72	0,0131	0,1084	Negr1
Echdc2	1,01	0,22	1,72	0,0087	0,0840	Echdc2
Rnf149	5,98	5,19	1,72	0,0014	0,0284	Rnf149
E2f8	2,42	1,63	1,72	0,0012	0,0256	E2f8
Anxa9	3,64	2,85	1,72	0,0071	0,0749	Anxa9
Pla2g16	4,52	3,73	1,72	0,0089	0,0851	Pla2g16
Mmp2	5,61	4,83	1,72	0,0065	0,0706	Mmp2
Tap1	7,24	6,46	1,72	0,0001	0,0068	Tap1
Habp4	4,44	3,66	1,72	0,0023	0,0376	Habp4
Timp2	9,62	8,84	1,71	0,0011	0,0238	Timp2
Adgre5	4,52	3,74	1,71	0,0054	0,0640	Adgre5
Asxl3	1	0,22	1,71	0,0007	0,0177	Asxl3
Sema7a	1,73	0,96	1,71	0,0002	0,0083	Sema7a
Msrb1	6,8	6,02	1,71	0,0002	0,0081	Msrb1
Ms4a8a	0,77	0	1,71	0,0014	0,0280	Ms4a8a
Emp1	0,77	0	1,71	0,0276	0,1745	Emp1
Atg16l2	3,89	3,12	1,71	0,0155	0,1204	Atg16l2
Kcnh3	1,4	0,63	1,71	0,0068	0,0727	Kcnh3
Gpr84	8,24	7,46	1,71	0,0095	0,0890	Gpr84
Gabrb3	1,86	1,09	1,71	0,0125	0,1052	Gabrb3
Fjx1	1,22	0,45	1,71	0,0213	0,1476	Fjx1
Dpep2	2,33	1,56	1,71	0,0161	0,1238	Dpep2
5031425F14Rik	1,92	1,15	1,71	0,0016	0,0303	5031425F14Rik
Eef1a2	2,96	2,19	1,71	0,0171	0,1289	Eef1a2
Chchd10	2,77	2,01	1,7	0,0255	0,1658	Chchd10
Mtcl1	2,41	1,64	1,7	0,0146	0,1160	Mtcl1
Gria4	2,11	1,35	1,7	0,0028	0,0418	Gria4
Rell1	3,5	2,73	1,7	0,0147	0,1167	Rell1
4933432I03Rik	0,87	0,11	1,7	0,0045	0,0571	4933432I03Rik
Rad51b	1,47	0,7	1,7	0,0132	0,1091	Rad51b
Arhgap19	3,11	2,34	1,7	0,0109	0,0968	Arhgap19
Gatm	7,56	6,79	1,7	4,33E-05	0,0037	Gatm
Samd4	2,35	1,58	1,7	0,0002	0,0082	Samd4
Sept5	2,31	1,55	1,7	0,0003	0,0119	Sept5
Foxd2	2	1,24	1,7	0,0014	0,0284	Foxd2
Oas1b	3,57	2,81	1,7	0,0104	0,0943	Oas1b
Pirb	3,49	2,73	1,7	2,88E-05	0,0030	Pirb
Il3ra	2,92	2,16	1,7	0,0276	0,1741	Il3ra
Slc7a4	2,34	1,58	1,69	0,0221	0,1513	Slc7a4
Myo16	1,3	0,54	1,69	0,0020	0,0345	Myo16
Anxa4	6,28	5,52	1,69	0,0016	0,0301	Anxa4
Dennd1a	6,14	5,38	1,69	0,0171	0,1286	Dennd1a
Nampt	6	5,25	1,69	0,0015	0,0289	Nampt
Pcbp4	3,24	2,48	1,69	0,0263	0,1688	Pcbp4
Slc11a1	9,97	9,22	1,69	7,28E-05	0,0050	Slc11a1
Grm8	1,46	0,71	1,69	0,0201	0,1420	Grm8
Lhpp	4,12	3,37	1,69	0,0062	0,0687	Lhpp
Plekho2	8,61	7,86	1,69	0,0096	0,0893	Plekho2
Thbs1	5,66	4,9	1,69	5,21E-05	0,0042	Thbs1
Sybu	1,2	0,45	1,68	0,0125	0,1052	Sybu
Pbxip1	5,69	4,94	1,68	0,0010	0,0221	Pbxip1
Nfkbia	8,25	7,5	1,68	0,0053	0,0632	Nfkbia
Adam22	3,62	2,87	1,68	0,0128	0,1070	Adam22
Nyap1	2,9	2,15	1,68	0,0282	0,1770	Nyap1
Arhgap33	2,85	2,1	1,68	0,0284	0,1776	Arhgap33
Elavl2	1,53	0,78	1,68	0,0006	0,0168	Elavl2
Fam3c	6,67	5,92	1,68	3,19E-05	0,0031	Fam3c
Gadd45g	6,2	5,45	1,68	0,0016	0,0303	Gadd45g
Epha10	1,66	0,91	1,68	0,0229	0,1548	Epha10
Syne3	0,96	0,21	1,68	0,0016	0,0301	Syne3
Cd24a	1,38	0,63	1,68	0,0072	0,0757	Cd24a
Tmem171	0,75	0	1,68	0,0095	0,0888	Tmem171
Ntrk3	3,35	2,6	1,68	0,0042	0,0539	Ntrk3
Nrsn1	2,14	1,39	1,68	0,0275	0,1738	Nrsn1
Dennd3	3,77	3,02	1,68	0,0011	0,0244	Dennd3
Itgb7	0,85	0,1	1,68	0,0006	0,0162	Itgb7
Fam49a	5,92	5,18	1,67	0,0065	0,0708	Fam49a
Dapk1	5,81	5,07	1,67	0,0045	0,0569	Dapk1
Ly6h	2,27	1,52	1,67	0,0048	0,0589	Ly6h
Vps13c	5,79	5,05	1,67	0,0031	0,0449	Vps13c
Gca	4,06	3,31	1,67	0,0014	0,0279	Gca
Mical2	3,41	2,67	1,67	0,0285	0,1782	Mical2
Tmem106a	5,2	4,46	1,67	0,0025	0,0389	Tmem106a
Rap2a	7,7	6,96	1,67	0,0007	0,0181	Rap2a
Ttyh2	5,64	4,9	1,67	0,0024	0,0378	Ttyh2
Pdgfc	1,97	1,24	1,67	0,0090	0,0859	Pdgfc
Nmnat2	1,34	0,6	1,67	0,0246	0,1622	Nmnat2
Soat1	6,25	5,51	1,67	0,0037	0,0504	Soat1
Tuft1	3,26	2,52	1,67	0,0073	0,0764	Tuft1
Fcgr2b	2,17	1,43	1,67	0,0139	0,1128	Fcgr2b
Gm19557	0,74	0	1,67	0,0336	0,1967	Gm19557
Adk	3,63	2,89	1,67	0,0288	0,1793	Adk
Psen2	6,49	5,76	1,66	0,0017	0,0307	Psen2
Ephb2	1,61	0,88	1,66	0,0143	0,1147	Ephb2
Mmp12	1,44	0,71	1,66	0,0233	0,1565	Mmp12
Nrxn2	3,7	2,96	1,66	0,0079	0,0800	Nrxn2
Dclk1	1,78	1,04	1,66	0,0036	0,0491	Dclk1
Scpep1	7,01	6,28	1,66	0,0016	0,0300	Scpep1
Gm29907	1,33	0,6	1,66	0,0209	0,1454	Gm29907
Kcnh1	2,22	1,49	1,66	0,0335	0,1964	Kcnh1
Nfkbid	6,3	5,57	1,66	0,0103	0,0936	Nfkbid
B230217C12Rik	2,12	1,39	1,66	0,0009	0,0209	B230217C12Rik
Atp2a3	4,79	4,07	1,66	0,0027	0,0411	Atp2a3
A930017M01Rik	1,17	0,44	1,66	0,0078	0,0789	A930017M01Rik
Fam26f	4,85	4,13	1,66	9,95E-05	0,0061	Fam26f
Hpse	1,56	0,83	1,66	0,0270	0,1719	Hpse
Rnf145	6,33	5,6	1,66	0,0006	0,0169	Rnf145
Ier2	4,23	3,5	1,66	0,0332	0,1955	Ier2
Ptprz1	1,33	0,6	1,65	0,0009	0,0205	Ptprz1
Car11	3,7	2,97	1,65	0,0045	0,0566	Car11
Tmem57	4,84	4,12	1,65	0,0003	0,0123	Tmem57
Trp53inp2	4,5	3,78	1,65	0,0175	0,1305	Trp53inp2
Sh3bgrl3	8,31	7,59	1,65	0,0119	0,1026	Sh3bgrl3
Syt14	1,39	0,67	1,65	0,0229	0,1548	Syt14
Stim2	5,43	4,71	1,65	0,0018	0,0317	Stim2
Raet1d	0,72	0	1,65	0,0027	0,0410	Raet1d
Dgkz	8,51	7,78	1,65	0,0015	0,0295	Dgkz
Plaur	5,77	5,05	1,65	0,0079	0,0800	Plaur
Gna14	2,74	2,02	1,65	0,0279	0,1758	Gna14
Nrg2	1,41	0,69	1,65	0,0329	0,1944	Nrg2
Dnah17	0,96	0,24	1,65	0,0342	0,1993	Dnah17
Mansc1	0,93	0,22	1,65	0,0072	0,0755	Mansc1
Slit3	1,91	1,19	1,64	0,0228	0,1546	Slit3
Ndrg2	2,71	1,99	1,64	0,0195	0,1401	Ndrg2
Insig1	4,63	3,91	1,64	0,0039	0,0513	Insig1
Caprin2	2,06	1,35	1,64	0,0005	0,0145	Caprin2
Racgap1	4,42	3,7	1,64	0,0030	0,0435	Racgap1
Dok3	8,43	7,72	1,64	0,0035	0,0481	Dok3
Strip2	1,32	0,61	1,64	0,0018	0,0318	Strip2
Pdlim2	5,6	4,89	1,64	5,74E-05	0,0043	Pdlim2
Snx8	7,41	6,7	1,64	0,0002	0,0077	Snx8
Tmem132b	2,4	1,69	1,64	0,0015	0,0293	Tmem132b
Gm14005	3,62	2,91	1,64	0,0050	0,0603	Gm14005
Capg	5,6	4,89	1,64	0,0002	0,0100	Capg
Ctsd	15,16	14,45	1,64	0,0037	0,0499	Ctsd
Resp18	1,22	0,52	1,64	0,0024	0,0380	Resp18
Rims1	1,16	0,45	1,64	0,0073	0,0761	Rims1
Rhod	0,82	0,11	1,63	0,0012	0,0255	Rhod
Map3k5	5,46	4,75	1,63	0,0058	0,0667	Map3k5
Mab21l3	0,71	0	1,63	0,0066	0,0718	Mab21l3
Aldoc	5,04	4,34	1,63	0,0261	0,1680	Aldoc
Taf1b	5,91	5,21	1,63	0,0057	0,0662	Taf1b
Kcnc3	2,24	1,53	1,63	0,0155	0,1204	Kcnc3
Baiap2	4,62	3,92	1,63	0,0196	0,1401	Baiap2
Lmnb1	3,58	2,88	1,63	0,0013	0,0259	Lmnb1
Rpgrip1	1,06	0,35	1,63	0,0023	0,0369	Rpgrip1
Cacna1a	5,31	4,61	1,63	2,05E-05	0,0026	Cacna1a
Aplp2	7,62	6,92	1,63	0,0001	0,0072	Aplp2
Siglece	8,71	8,01	1,62	0,0003	0,0111	Siglece
Kcna6	1,91	1,21	1,62	0,0105	0,0947	Kcna6
Gm30908	1,02	0,32	1,62	0,0328	0,1943	Gm30908
Ephb6	0,9	0,2	1,62	0,0109	0,0968	Ephb6
Rilpl2	3,99	3,29	1,62	0,0108	0,0959	Rilpl2
Fkbp1b	2,1	1,4	1,62	0,0066	0,0716	Fkbp1b
Parvb	5,6	4,9	1,62	0,0015	0,0285	Parvb
Nupr1	5,24	4,54	1,62	0,0089	0,0852	Nupr1
Gm2a	7,34	6,65	1,62	0,0012	0,0257	Gm2a
Plppr4	2,63	1,94	1,62	0,0049	0,0594	Plppr4
Cracr2a	5,6	4,91	1,62	0,0003	0,0121	Cracr2a
Mta3	7,14	6,44	1,62	0,0013	0,0268	Mta3
Ccdc88c	1,67	0,98	1,62	0,0292	0,1811	Ccdc88c
Aatk	4,18	3,48	1,62	3,33E-05	0,0032	Aatk
Pla2g2d	0,91	0,21	1,62	0,0140	0,1131	Pla2g2d
Shcbp1l	1,49	0,79	1,62	0,0005	0,0144	Shcbp1l
Arfgef2	5,21	4,52	1,62	0,0225	0,1531	Arfgef2
Plec	3,79	3,1	1,62	0,0016	0,0297	Plec
1190002N15Rik	6,25	5,56	1,61	0,0007	0,0189	1190002N15Rik
Tpk1	3,81	3,12	1,61	0,0004	0,0126	Tpk1
9330179D12Rik	0,69	0	1,61	0,0025	0,0390	9330179D12Rik
Jph3	2,67	1,98	1,61	0,0167	0,1267	Jph3
Slamf6	3,98	3,29	1,61	0,0120	0,1031	Slamf6
Degs1	6,63	5,94	1,61	0,0003	0,0120	Degs1
Gdf15	1,38	0,69	1,61	0,0062	0,0689	Gdf15
Net1	2,01	1,33	1,61	0,0147	0,1169	Net1
Cntn2	3,18	2,5	1,61	0,0255	0,1657	Cntn2
Dcstamp	0,69	0	1,61	0,0249	0,1633	Dcstamp
Atcay	2,12	1,43	1,61	0,0031	0,0450	Atcay
Pcdh1	3,33	2,64	1,61	0,0041	0,0531	Pcdh1
Gm4951	0,8	0,11	1,61	0,0057	0,0662	Gm4951
Tctex1d4	1,25	0,57	1,61	0,0117	0,1015	Tctex1d4
Zfp462	1,16	0,48	1,61	0,0035	0,0481	Zfp462
Mpped1	1,62	0,93	1,61	0,0193	0,1396	Mpped1
Uhrf1bp1l	5,12	4,44	1,6	0,0005	0,0154	Uhrf1bp1l
Endou	0,68	0	1,6	0,0021	0,0352	Endou
Pcdh11x	0,85	0,17	1,6	0,0179	0,1325	Pcdh11x
Mfsd12	6,93	6,25	1,6	0,0002	0,0094	Mfsd12
Mtmr12	5,4	4,72	1,6	1,33E-05	0,0021	Mtmr12
Acbd4	1,01	0,33	1,6	0,0082	0,0816	Acbd4
Pid1	4,86	4,19	1,6	0,0056	0,0651	Pid1
Smim14	6,27	5,59	1,6	0,0002	0,0078	Smim14
Arhgap18	5,81	5,13	1,6	0,0073	0,0762	Arhgap18
Nr4a1	3,24	2,56	1,6	0,0082	0,0814	Nr4a1
Tor3a	6,74	6,07	1,59	0,0045	0,0569	Tor3a
Tpd52	7,97	7,3	1,59	0,0038	0,0512	Tpd52
Rab13	1,46	0,79	1,59	0,0071	0,0750	Rab13
Rdh5	2,94	2,27	1,59	0,0127	0,1067	Rdh5
Gm12589	0,67	0	1,59	0,0002	0,0100	Gm12589
LOC102632778	0,8	0,13	1,59	0,0079	0,0798	LOC102632778
Bex2	2,72	2,05	1,59	0,0064	0,0705	Bex2
Itpka	1,4	0,73	1,59	0,0297	0,1831	Itpka
Nrgn	2,51	1,84	1,59	0,0048	0,0589	Nrgn
Tmem59l	3,14	2,48	1,59	0,0061	0,0682	Tmem59l
Glb1	7,94	7,28	1,59	0,0007	0,0189	Glb1
Kcnk2	0,78	0,11	1,59	0,0307	0,1863	Kcnk2
Gm14461	0,67	0	1,59	0,0001	0,0075	Gm14461
Cd48	6,48	5,82	1,59	3,40E-05	0,0032	Cd48
Epb41l1	2,47	1,81	1,58	0,0123	0,1046	Epb41l1
Aim1	1,86	1,2	1,58	0,0025	0,0391	Aim1
Amer2	3,24	2,58	1,58	0,0101	0,0922	Amer2
Tmem35	1,06	0,4	1,58	0,0321	0,1919	Tmem35
Agpat4	2,64	1,98	1,58	0,0085	0,0830	Agpat4
Abca1	10,13	9,47	1,58	0,0097	0,0900	Abca1
Mbd4	1,19	0,53	1,58	0,0172	0,1293	Mbd4
Sh2b1	7,8	7,14	1,58	0,0012	0,0255	Sh2b1
LOC102638940	1,76	1,1	1,58	0,0021	0,0347	LOC102638940
Adam9	6,42	5,76	1,58	0,0006	0,0167	Adam9
March3	4,46	3,8	1,58	0,0006	0,0171	March3
Gm32633	1,1	0,44	1,58	0,0058	0,0668	Gm32633
Plscr1	2,08	1,43	1,58	0,0086	0,0835	Plscr1
Bambi	2,18	1,53	1,58	0,0036	0,0497	Bambi
Tppp3	1,21	0,55	1,58	0,0316	0,1898	Tppp3
Ovol2	0,66	0	1,58	0,0252	0,1644	Ovol2
Snap91	2,01	1,36	1,58	0,0009	0,0206	Snap91
Dscam	1,1	0,44	1,58	0,0043	0,0547	Dscam
Tlcd1	1,11	0,45	1,58	0,0128	0,1070	Tlcd1
Sh3rf1	2,13	1,47	1,58	0,0117	0,1017	Sh3rf1
Morn1	2,74	2,09	1,58	0,0057	0,0662	Morn1
Ppp2r5b	5,18	4,52	1,57	0,0017	0,0316	Ppp2r5b
Myo9b	8,61	7,96	1,57	0,0153	0,1192	Myo9b
Kif1c	5,93	5,27	1,57	0,0119	0,1026	Kif1c
Robo1	1,26	0,6	1,57	6,43E-05	0,0047	Robo1
4933424M12Rik	2,62	1,97	1,57	0,0297	0,1828	4933424M12Rik
Eogt	6,55	5,9	1,57	0,0008	0,0193	Eogt
Tmed1	3,79	3,14	1,57	0,0106	0,0951	Tmed1
Rhbdf2	6,88	6,23	1,57	0,0019	0,0334	Rhbdf2
Tnk2	2,62	1,97	1,57	0,0344	0,1999	Tnk2
5830416I19Rik	0,65	0	1,57	0,0300	0,1840	5830416I19Rik
Osbpl3	2,32	1,67	1,57	0,0009	0,0211	Osbpl3
Atpif1	1,15	0,5	1,57	0,0316	0,1896	Atpif1
Ebi3	6,15	5,5	1,57	0,0006	0,0162	Ebi3
Lmo7	0,94	0,29	1,57	0,0009	0,0206	Lmo7
Syt11	5,78	5,13	1,57	0,0013	0,0261	Syt11
Ticrr	1,48	0,83	1,57	0,0123	0,1044	Ticrr
Rnase2a	0,65	0	1,57	0,0023	0,0376	Rnase2a
Nudt1	3,18	2,53	1,57	0,0171	0,1289	Nudt1
Ero1l	5,44	4,79	1,57	0,0004	0,0137	Ero1l
Slco3a1	2,22	1,57	1,57	0,0300	0,1839	Slco3a1
Adcy9	6,02	5,37	1,57	0,0012	0,0251	Adcy9
Sdr39u1	2,19	1,55	1,56	0,0021	0,0350	Sdr39u1
Cyp51	3,71	3,06	1,56	0,0136	0,1107	Cyp51
Fam229b	1,74	1,09	1,56	0,0151	0,1183	Fam229b
Tshz3	0,64	0	1,56	0,0008	0,0191	Tshz3
Ier5l	1,37	0,73	1,56	0,0177	0,1319	Ier5l
Mcoln2	0,64	0	1,56	7,67E-07	0,0007	Mcoln2
Grk6	7,57	6,93	1,56	0,0139	0,1125	Grk6
Hacd2	5,98	5,34	1,56	0,0068	0,0728	Hacd2
Kcnd2	2,86	2,22	1,56	0,0052	0,0618	Kcnd2
Ctsb	12,55	11,91	1,56	0,0005	0,0148	Ctsb
Gch1	3,31	2,67	1,56	0,0085	0,0828	Gch1
Tctn3	4,76	4,12	1,56	0,0098	0,0910	Tctn3
Pmm1	1,62	0,98	1,56	0,0238	0,1589	Pmm1
Ifit2	2,09	1,46	1,56	0,0020	0,0341	Ifit2
Spred2	6,13	5,49	1,55	0,0073	0,0759	Spred2
Gys1	4,85	4,21	1,55	0,0096	0,0896	Gys1
Susd6	7,29	6,66	1,55	0,0015	0,0287	Susd6
Serpinb7	0,64	0	1,55	0,0089	0,0849	Serpinb7
Egfl7	1,39	0,75	1,55	0,0203	0,1429	Egfl7
Csmd2	1,18	0,55	1,55	0,0166	0,1263	Csmd2
Sept9	4,41	3,78	1,55	0,0016	0,0297	Sept9
Epha2	7,26	6,63	1,55	0,0209	0,1453	Epha2
Slc5a6	5,02	4,38	1,55	0,0068	0,0730	Slc5a6
Akr1c12	0,63	0	1,55	0,0035	0,0485	Akr1c12
Gbp3	5,93	5,3	1,55	0,0159	0,1228	Gbp3
Ybx1	7,64	7,01	1,55	0,0005	0,0150	Ybx1
Rragb	0,92	0,3	1,55	0,0179	0,1326	Rragb
Ndst1	6,6	5,98	1,54	0,0041	0,0535	Ndst1
C330027C09Rik	2,02	1,39	1,54	0,0202	0,1426	C330027C09Rik
Igsf8	4,16	3,54	1,54	0,0091	0,0863	Igsf8
Stx1b	1,93	1,3	1,54	0,0166	0,1267	Stx1b
Gabra5	0,84	0,21	1,54	0,0283	0,1776	Gabra5
Chrna7	1,05	0,42	1,54	0,0008	0,0191	Chrna7
Gm31633	0,63	0	1,54	0,0121	0,1032	Gm31633
L1cam	1,79	1,16	1,54	0,0013	0,0266	L1cam
Tec	6,69	6,06	1,54	0,0021	0,0354	Tec
Hcst	4,82	4,2	1,54	0,0055	0,0642	Hcst
Pcnx	6,06	5,44	1,54	0,0008	0,0192	Pcnx
Inpp4a	6,11	5,49	1,54	0,0234	0,1570	Inpp4a
Tmem123	7,98	7,36	1,54	0,0044	0,0562	Tmem123
C130050O18Rik	4,76	4,14	1,54	0,0007	0,0190	C130050O18Rik
Pbdc1	3,51	2,88	1,54	0,0007	0,0186	Pbdc1
Dscaml1	2,13	1,51	1,54	0,0038	0,0507	Dscaml1
Cplx1	2,09	1,46	1,54	0,0076	0,0779	Cplx1
LOC102637873	1,22	0,6	1,54	0,0120	0,1028	LOC102637873
Enkd1	3,09	2,47	1,54	0,0234	0,1573	Enkd1
Rhbdl3	0,98	0,36	1,54	0,0330	0,1946	Rhbdl3
Slc6a6	8,42	7,8	1,54	0,0004	0,0140	Slc6a6
Agrn	3,6	2,97	1,54	0,0036	0,0497	Agrn
Smyd2	3,81	3,19	1,54	0,0030	0,0437	Smyd2
Klhl13	3,56	2,94	1,54	0,0041	0,0538	Klhl13
Gabra4	1,59	0,97	1,54	0,0009	0,0217	Gabra4
Slc1a4	4,96	4,34	1,54	0,0282	0,1769	Slc1a4
Mtrf1	4,49	3,87	1,54	0,0014	0,0281	Mtrf1
Sesn1	7,59	6,97	1,53	0,0020	0,0343	Sesn1
Akap10	5,68	5,07	1,53	0,0042	0,0542	Akap10
Shank1	2,48	1,86	1,53	0,0267	0,1707	Shank1
Me3	0,9	0,29	1,53	0,0033	0,0467	Me3
Smagp	6,04	5,43	1,53	0,0085	0,0829	Smagp
Stx16	7,8	7,18	1,53	0,0073	0,0759	Stx16
Anpep	0,92	0,31	1,53	0,0250	0,1641	Anpep
Rgs14	5,45	4,84	1,53	0,0042	0,0539	Rgs14
Cuedc1	1,25	0,64	1,53	0,0307	0,1861	Cuedc1
Rep15	0,98	0,36	1,53	0,0141	0,1137	Rep15
Pdgfa	6,04	5,43	1,53	1,46E-05	0,0022	Pdgfa
Epb41l3	5,49	4,87	1,53	0,0059	0,0671	Epb41l3
Asic4	1,16	0,55	1,53	0,0016	0,0303	Asic4
Stk17b	5,8	5,19	1,53	0,0024	0,0378	Stk17b
Gad2	0,81	0,2	1,53	0,0306	0,1857	Gad2
Mcm9	5,25	4,64	1,53	0,0173	0,1298	Mcm9
Ift43	2,47	1,85	1,53	0,0021	0,0347	Ift43
Cadm1	8,66	8,05	1,53	0,0016	0,0303	Cadm1
Fcna	1,05	0,44	1,53	0,0035	0,0486	Fcna
Ccdc171	1,77	1,16	1,53	0,0022	0,0360	Ccdc171
Tmem191c	1,66	1,05	1,52	0,0163	0,1248	Tmem191c
Cacnb1	1,91	1,3	1,52	0,0199	0,1411	Cacnb1
Grina	9,47	8,86	1,52	0,0001	0,0068	Grina
Daam1	5,03	4,42	1,52	0,0085	0,0828	Daam1
Slc16a10	5,11	4,5	1,52	0,0004	0,0139	Slc16a10
Mtss1l	2,63	2,02	1,52	0,0208	0,1450	Mtss1l
Hps5	7,07	6,46	1,52	0,0005	0,0150	Hps5
Gaa	8,46	7,85	1,52	0,0015	0,0288	Gaa
Retsat	4,91	4,3	1,52	0,0059	0,0672	Retsat
Grid2ip	1,14	0,54	1,52	0,0065	0,0709	Grid2ip
Gm20172	1,18	0,58	1,52	0,0207	0,1446	Gm20172
Ube2l6	5,29	4,69	1,52	0,0005	0,0159	Ube2l6
Gm20594	0,9	0,3	1,52	0,0328	0,1943	Gm20594
Pilrb2	0,6	0	1,52	0,0243	0,1609	Pilrb2
Cspg4	1,38	0,78	1,52	0,0236	0,1580	Cspg4
Sobp	1,64	1,04	1,51	0,0155	0,1203	Sobp
1110001J03Rik	3,62	3,02	1,51	0,0215	0,1486	1110001J03Rik
Slc8b1	6,89	6,29	1,51	0,0014	0,0276	Slc8b1
Rap1gap	1,33	0,73	1,51	0,0063	0,0694	Rap1gap
Arrdc2	5,17	4,58	1,51	0,0055	0,0649	Arrdc2
Flot2	6,15	5,55	1,51	0,0033	0,0470	Flot2
Sez6l2	4,72	4,12	1,51	0,0057	0,0659	Sez6l2
Wnt7b	0,98	0,39	1,51	0,0011	0,0242	Wnt7b
1700007L15Rik	2,05	1,46	1,51	0,0237	0,1586	1700007L15Rik
Galnt7	7,13	6,53	1,51	0,0010	0,0224	Galnt7
Ptprc	7,7	7,11	1,51	0,0003	0,0112	Ptprc
Xist	10,41	9,81	1,51	0,0124	0,1047	Xist
Egr2	0,96	0,37	1,51	0,0239	0,1594	Egr2
Dclre1c	7,7	7,11	1,51	0,0042	0,0544	Dclre1c
Fstl5	1,13	0,54	1,51	0,0178	0,1319	Fstl5
Tomm7	5,01	4,42	1,51	0,0087	0,0842	Tomm7
Klra17	0,59	0	1,51	0,0025	0,0393	Klra17
Eid1	1,76	1,17	1,51	0,0285	0,1780	Eid1
Gltp	6,26	5,67	1,51	0,0146	0,1162	Gltp
S1pr1	8,33	7,74	1,51	0,0013	0,0264	S1pr1
Atp2b3	3,52	2,93	1,5	0,0106	0,0955	Atp2b3
Ltk	0,59	0	1,5	0,0264	0,1690	Ltk
Ptprj	9,27	8,68	1,5	0,0023	0,0372	Ptprj
Cask	3,07	2,48	1,5	0,0238	0,1588	Cask
Slc35d2	3,82	3,23	1,5	0,0067	0,0722	Slc35d2
4833419F23Rik	1,27	0,68	1,5	0,0111	0,0978	4833419F23Rik
Gpsm2	0,78	0,2	1,5	0,0201	0,1421	Gpsm2
Slc6a1	4,26	3,68	1,5	0,0058	0,0667	Slc6a1
2610020H08Rik	1,61	1,03	1,5	0,0012	0,0253	2610020H08Rik
Atp6v0d2	0,59	0	1,5	0,0168	0,1274	Atp6v0d2
Ak5	0,86	0,27	1,5	0,0009	0,0217	Ak5
Kif7	1,19	0,6	1,5	0,0148	0,1173	Kif7
Spryd7	4,24	3,66	1,5	0,0097	0,0903	Spryd7
Mex3d	4,77	5,36	-1,5	0,0038	0,0509	Mex3d
Usp6nl	3,84	4,43	-1,5	0,0075	0,0772	Usp6nl
Cds2	8,69	9,28	-1,5	0,0012	0,0258	Cds2
Scaf11	5,14	5,73	-1,5	0,0150	0,1180	Scaf11
Map4k5	5,76	6,35	-1,5	0,0090	0,0856	Map4k5
Rgs10	9,51	10,11	-1,51	0,0002	0,0080	Rgs10
Tmod3	3,79	4,38	-1,51	0,0030	0,0438	Tmod3
Tspan33	4,93	5,52	-1,51	0,0009	0,0207	Tspan33
Slc25a45	7,79	8,39	-1,51	0,0060	0,0673	Slc25a45
Slco2b1	10,51	11,1	-1,51	0,0005	0,0150	Slco2b1
Cpox	4,54	5,14	-1,51	0,0027	0,0409	Cpox
Rgs2	9,17	9,77	-1,51	0,0013	0,0260	Rgs2
Plekho1	8,84	9,43	-1,51	0,0026	0,0402	Plekho1
Bckdha	7,09	7,68	-1,51	0,0032	0,0460	Bckdha
Vapa	6,22	6,81	-1,51	0,0299	0,1838	Vapa
Pear1	5,12	5,71	-1,51	0,0031	0,0453	Pear1
Bin1	10,75	11,35	-1,51	9,05E-05	0,0058	Bin1
Akr1b10	5,18	5,78	-1,51	2,12E-06	0,0008	Akr1b10
Mef2d	3,43	4,03	-1,51	0,0305	0,1856	Mef2d
4930447M23Rik	2,16	2,76	-1,51	0,0011	0,0247	4930447M23Rik
Mex3a	1,04	1,64	-1,51	0,0131	0,1082	Mex3a
Gata2	0,1	0,7	-1,52	0,0178	0,1319	Gata2
Mdp1	4,15	4,75	-1,52	0,0254	0,1655	Mdp1
Shb	4	4,6	-1,52	0,0029	0,0426	Shb
Zfpm1	6,55	7,16	-1,52	0,0001	0,0071	Zfpm1
Wdr78	0,55	1,16	-1,53	0,0043	0,0550	Wdr78
Pld1	8,05	8,66	-1,53	0,0065	0,0706	Pld1
Eif4g2	7,9	8,51	-1,53	0,0024	0,0380	Eif4g2
Ebf3	4,01	4,62	-1,53	0,0139	0,1124	Ebf3
Eefsec	4,93	5,54	-1,53	0,0003	0,0117	Eefsec
Chsy1	7,98	8,59	-1,53	0,0212	0,1470	Chsy1
Nmi	4,13	4,75	-1,53	0,0048	0,0593	Nmi
Fzd4	5,63	6,25	-1,53	0,0038	0,0509	Fzd4
Foxk2	6,46	7,08	-1,53	2,73E-05	0,0029	Foxk2
Arl15	4,18	4,79	-1,53	0,0027	0,0414	Arl15
Usp21	6,37	6,99	-1,53	0,0093	0,0876	Usp21
Pnpla8	4,52	5,14	-1,53	0,0005	0,0157	Pnpla8
Sik2	3,69	4,31	-1,53	0,0003	0,0120	Sik2
Hpgds	8,91	9,53	-1,54	0,0049	0,0594	Hpgds
Hcfc2	4,11	4,73	-1,54	0,0064	0,0705	Hcfc2
Ypel2	4,37	4,99	-1,54	0,0078	0,0790	Ypel2
Csrnp2	3,91	4,53	-1,54	0,0197	0,1404	Csrnp2
A830052D11Rik	0,78	1,4	-1,54	0,0248	0,1633	A830052D11Rik
Nxpe3	3,63	4,25	-1,54	0,0057	0,0659	Nxpe3
Ppp2ca	8,62	9,24	-1,54	0,0095	0,0888	Ppp2ca
Sla	8,33	8,96	-1,54	0,0110	0,0973	Sla
Fam102b	8,27	8,89	-1,54	0,0027	0,0411	Fam102b
Clstn1	8,68	9,3	-1,54	0,0009	0,0211	Clstn1
LOC105245439	4,01	4,63	-1,54	0,0225	0,1533	LOC105245439
Man1a	6,68	7,3	-1,54	0,0018	0,0322	Man1a
Cnot8	7,05	7,68	-1,54	0,0019	0,0329	Cnot8
Apool	3,78	4,4	-1,54	0,0140	0,1131	Apool
Ubac1	4,41	5,04	-1,54	0,0201	0,1420	Ubac1
Zcchc14	4,75	5,37	-1,54	0,0001	0,0073	Zcchc14
Zfp36l3	0,82	1,44	-1,54	0,0196	0,1402	Zfp36l3
Arhgap5	7,11	7,74	-1,55	0,0010	0,0226	Arhgap5
Smad3	7,21	7,84	-1,55	0,0273	0,1729	Smad3
Rasgrp3	6,47	7,1	-1,55	0,0007	0,0186	Rasgrp3
Man1a2	6,23	6,86	-1,55	0,0027	0,0412	Man1a2
Senp6	3,5	4,13	-1,55	0,0262	0,1685	Senp6
4933411K16Rik	2,21	2,84	-1,55	0,0252	0,1644	4933411K16Rik
Kdm2b	3,42	4,05	-1,55	0,0003	0,0107	Kdm2b
Gm6402	2,14	2,77	-1,55	0,0210	0,1455	Gm6402
Fkbp9	4,22	4,86	-1,55	0,0058	0,0667	Fkbp9
Klhl36	5,25	5,89	-1,56	0,0045	0,0570	Klhl36
Eid2b	3,18	3,81	-1,56	0,0004	0,0137	Eid2b
Fzd8	0,21	0,85	-1,56	0,0024	0,0378	Fzd8
Btbd3	3,83	4,47	-1,56	0,0311	0,1878	Btbd3
Gm6277	4,99	5,63	-1,56	0,0093	0,0874	Gm6277
Naaa	5,06	5,7	-1,56	0,0062	0,0692	Naaa
Hk1	3,98	4,63	-1,56	0,0049	0,0594	Hk1
Tbc1d16	7,12	7,77	-1,57	0,0004	0,0129	Tbc1d16
Tal1	4,94	5,59	-1,57	0,0019	0,0334	Tal1
Glul	8,49	9,14	-1,57	0,0031	0,0449	Glul
Bach2	5,59	6,24	-1,57	0,0011	0,0240	Bach2
Snx10	5,6	6,25	-1,57	0,0060	0,0679	Snx10
B130006D01Rik	3,89	4,54	-1,57	0,0229	0,1548	B130006D01Rik
Pitpnc1	6,28	6,93	-1,57	0,0002	0,0086	Pitpnc1
Lpp	4,86	5,52	-1,57	0,0082	0,0815	Lpp
Bard1	1,78	2,44	-1,57	0,0298	0,1834	Bard1
Mertk	7,04	7,69	-1,58	0,0025	0,0392	Mertk
Cdkl4	1,24	1,9	-1,58	0,0070	0,0744	Cdkl4
Slc46a3	5,66	6,32	-1,58	0,0014	0,0280	Slc46a3
Ppp2r1b	6,17	6,83	-1,58	0,0006	0,0162	Ppp2r1b
Ryk	3,93	4,59	-1,58	0,0085	0,0827	Ryk
Gclc	5,77	6,43	-1,58	0,0028	0,0423	Gclc
Nr1d2	6,44	7,11	-1,58	0,0088	0,0844	Nr1d2
Frat1	3,71	4,37	-1,58	0,0006	0,0169	Frat1
Hhex	6,54	7,2	-1,58	0,0001	0,0071	Hhex
Trio	8,19	8,85	-1,58	0,0006	0,0162	Trio
Efna5	0,82	1,48	-1,58	0,0226	0,1534	Efna5
Trp53cor1	2,91	3,57	-1,59	0,0080	0,0805	Trp53cor1
Gm11827	0,24	0,91	-1,59	0,0066	0,0715	Gm11827
Prps2	5,1	5,77	-1,59	0,0048	0,0588	Prps2
Natd1	5,46	6,12	-1,59	0,0040	0,0527	Natd1
Tanc2	10,08	10,75	-1,59	0,0031	0,0454	Tanc2
Bmi1	4,55	5,22	-1,59	0,0031	0,0445	Bmi1
Arcn1	6,34	7,01	-1,59	0,0268	0,1711	Arcn1
Map3k9	5,67	6,34	-1,59	0,0003	0,0111	Map3k9
Ctnnal1	3,04	3,71	-1,59	0,0086	0,0835	Ctnnal1
Mapk12	0,11	0,77	-1,59	0,0052	0,0619	Mapk12
Elmo1	8,41	9,08	-1,59	0,0001	0,0062	Elmo1
Il6st	8,87	9,54	-1,59	0,0139	0,1126	Il6st
Snx29	7,13	7,8	-1,59	0,0002	0,0085	Snx29
Pkp4	4,83	5,5	-1,59	0,0031	0,0450	Pkp4
Gm3325	1,71	2,38	-1,59	0,0005	0,0145	Gm3325
Rasal2	3,93	4,6	-1,59	0,0081	0,0811	Rasal2
Fam72a	2,83	3,5	-1,59	0,0019	0,0334	Fam72a
Cdk5rap3	4,31	4,98	-1,59	0,0059	0,0672	Cdk5rap3
Pde1b	7,07	7,74	-1,59	0,0272	0,1723	Pde1b
Fuk	2,93	3,6	-1,59	0,0038	0,0509	Fuk
Marcks	6,19	6,86	-1,59	0,0006	0,0161	Marcks
4933421O10Rik	2,55	3,22	-1,6	0,0047	0,0583	4933421O10Rik
Sv2a	4,78	5,46	-1,6	0,0055	0,0643	Sv2a
Lpcat3	6,74	7,41	-1,6	3,89E-05	0,0035	Lpcat3
Ptpn12	3,24	3,92	-1,6	0,0002	0,0080	Ptpn12
Pik3c2b	4,48	5,15	-1,6	0,0100	0,0916	Pik3c2b
Nck1	5,07	5,75	-1,6	0,0015	0,0287	Nck1
Pde3b	8,81	9,49	-1,6	0,0002	0,0082	Pde3b
Fkbp11	0,37	1,04	-1,6	0,0027	0,0411	Fkbp11
Sardh	2,67	3,35	-1,6	0,0004	0,0132	Sardh
Rxfp1	0	0,68	-1,6	0,0059	0,0670	Rxfp1
Glis3	0	0,68	-1,6	0,0003	0,0105	Glis3
P2rx1	3,91	4,59	-1,6	0,0287	0,1790	P2rx1
Srgap2	9,41	10,1	-1,6	0,0014	0,0280	Srgap2
Vash1	4,49	5,17	-1,61	0,0061	0,0681	Vash1
Cdc42bpa	2,64	3,32	-1,61	0,0039	0,0514	Cdc42bpa
Fam167b	3,47	4,15	-1,61	0,0242	0,1606	Fam167b
Amotl1	3,59	4,28	-1,61	0,0070	0,0744	Amotl1
Pten	6,86	7,55	-1,61	0,0011	0,0239	Pten
Rrp1b	5,59	6,28	-1,61	0,0015	0,0285	Rrp1b
8030442B05Rik	5,62	6,31	-1,61	0,0099	0,0916	8030442B05Rik
Oxct1	5,96	6,65	-1,62	0,0049	0,0594	Oxct1
Tpgs1	4,26	4,95	-1,62	0,0255	0,1656	Tpgs1
Cep85l	5,07	5,77	-1,62	0,0060	0,0678	Cep85l
Bcat1	1,29	1,98	-1,62	0,0036	0,0497	Bcat1
Nbea	4,34	5,04	-1,62	0,0025	0,0389	Nbea
Lpin1	6,76	7,46	-1,62	0,0010	0,0231	Lpin1
Lzts2	3,95	4,65	-1,62	2,47E-05	0,0028	Lzts2
Adtrp	1,65	2,35	-1,62	0,0142	0,1141	Adtrp
S1pr4	3,72	4,42	-1,62	0,0042	0,0544	S1pr4
St3gal6	8,16	8,86	-1,62	0,0054	0,0639	St3gal6
Pygm	2,74	3,44	-1,63	0,0108	0,0965	Pygm
Prkx	5,06	5,76	-1,63	0,0018	0,0328	Prkx
Ccl6	6,68	7,38	-1,63	0,0032	0,0462	Ccl6
Tfpi	5,74	6,44	-1,63	0,0010	0,0229	Tfpi
Sdccag3	6,33	7,04	-1,63	0,0232	0,1561	Sdccag3
Ppp1r13l	2,74	3,44	-1,63	0,0181	0,1335	Ppp1r13l
Abcg3	1,32	2,02	-1,63	0,0182	0,1336	Abcg3
Slc16a1	4,07	4,77	-1,63	0,0005	0,0143	Slc16a1
Cfh	9,95	10,66	-1,63	0,0028	0,0423	Cfh
Arhgap31	5,93	6,64	-1,63	0,0105	0,0945	Arhgap31
Cib1	5,49	6,2	-1,63	0,0004	0,0131	Cib1
Irf2bpl	4,81	5,52	-1,63	0,0081	0,0809	Irf2bpl
Tcp11l2	4,45	5,16	-1,64	0,0128	0,1070	Tcp11l2
Med21	2,01	2,72	-1,64	0,0281	0,1766	Med21
2810025M15Rik	4,54	5,25	-1,64	0,0047	0,0588	2810025M15Rik
Sft2d2	9,25	9,96	-1,64	0,0021	0,0346	Sft2d2
Ubxn2b	3,06	3,77	-1,64	0,0121	0,1035	Ubxn2b
Iffo1	8,43	9,14	-1,64	0,0023	0,0373	Iffo1
Tln2	5,49	6,21	-1,64	0,0003	0,0107	Tln2
Csnk1e	6,05	6,76	-1,64	0,0021	0,0353	Csnk1e
Mib2	8,27	8,99	-1,64	0,0088	0,0845	Mib2
Plxdc2	10,14	10,86	-1,64	0,0035	0,0489	Plxdc2
Neo1	3,09	3,81	-1,64	0,0067	0,0721	Neo1
Gm4943	1,67	2,39	-1,64	0,0162	0,1240	Gm4943
Hhat	2,5	3,22	-1,65	0,0327	0,1940	Hhat
Ikzf2	1,29	2,01	-1,65	0,0018	0,0319	Ikzf2
Prkcq	1,64	2,36	-1,65	0,0046	0,0578	Prkcq
9930021J03Rik	3,56	4,28	-1,65	0,0081	0,0810	9930021J03Rik
Zfyve9	3,08	3,8	-1,65	0,0026	0,0401	Zfyve9
D030028A08Rik	2,46	3,19	-1,65	0,0127	0,1064	D030028A08Rik
Mmgt1	4,47	5,19	-1,65	0,0043	0,0552	Mmgt1
Med12l	4,61	5,34	-1,65	0,0029	0,0430	Med12l
Snx6	6,02	6,75	-1,65	0,0174	0,1299	Snx6
Creb3l2	5,75	6,47	-1,65	0,0023	0,0366	Creb3l2
Osbpl11	6,87	7,6	-1,65	0,0003	0,0106	Osbpl11
Rab19	0,56	1,28	-1,66	0,0336	0,1967	Rab19
Rapgef5	8,29	9,02	-1,66	0,0001	0,0070	Rapgef5
Tfap4	3,88	4,61	-1,66	0,0117	0,1018	Tfap4
Tmem128	4,96	5,69	-1,66	0,0214	0,1479	Tmem128
Ephb3	3,52	4,25	-1,66	0,0004	0,0132	Ephb3
Arhgef40	6,38	7,11	-1,66	0,0097	0,0899	Arhgef40
Cc2d2a	0,99	1,72	-1,66	0,0237	0,1586	Cc2d2a
Smap2	8,85	9,59	-1,66	2,44E-05	0,0028	Smap2
Rhoq	6,48	7,22	-1,67	0,0026	0,0396	Rhoq
Arhgef18	4,31	5,05	-1,67	0,0001	0,0064	Arhgef18
Slc25a37	2,37	3,11	-1,67	0,0003	0,0106	Slc25a37
2610528A11Rik	2,78	3,52	-1,67	0,0026	0,0403	2610528A11Rik
Akirin2	7,37	8,11	-1,67	0,0030	0,0437	Akirin2
Otud7b	5,54	6,28	-1,67	0,0006	0,0167	Otud7b
Acy1	4,75	5,48	-1,67	0,0067	0,0722	Acy1
Nradd	4,14	4,88	-1,67	0,0021	0,0350	Nradd
Large	6,96	7,71	-1,67	1,77E-05	0,0024	Large
Klf12	6,05	6,79	-1,67	0,0013	0,0269	Klf12
Fkbp7	3,45	4,19	-1,67	0,0020	0,0343	Fkbp7
Btbd17	1	1,74	-1,67	0,0277	0,1747	Btbd17
Sppl3	6,98	7,72	-1,67	0,0139	0,1128	Sppl3
Arglu1	5,75	6,49	-1,67	0,0174	0,1304	Arglu1
Sipa1l1	4,97	5,71	-1,68	0,0102	0,0928	Sipa1l1
Ccng2	7,98	8,73	-1,68	6,84E-05	0,0049	Ccng2
Slamf1	3,36	4,11	-1,68	0,0018	0,0321	Slamf1
Rab39	5,69	6,44	-1,68	0,0004	0,0134	Rab39
Rbm41	3,43	4,18	-1,68	0,0075	0,0772	Rbm41
Ggps1	6,24	6,99	-1,68	0,0019	0,0334	Ggps1
4933412E12Rik	2,8	3,56	-1,68	0,0038	0,0508	4933412E12Rik
Bin2	8,16	8,91	-1,68	0,0012	0,0253	Bin2
Rpa2	3,47	4,22	-1,69	0,0086	0,0832	Rpa2
Kcnma1	4,12	4,88	-1,69	0,0086	0,0835	Kcnma1
Plxna4	5,01	5,77	-1,69	0,0010	0,0222	Plxna4
LOC108167662	0,21	0,97	-1,69	0,0018	0,0317	LOC108167662
Flnb	4,51	5,27	-1,69	0,0052	0,0619	Flnb
Angptl7	4,32	5,08	-1,7	0,0077	0,0781	Angptl7
LOC105246961	2,96	3,73	-1,7	0,0030	0,0437	LOC105246961
Plcl2	5,38	6,15	-1,7	0,0013	0,0265	Plcl2
Frat2	2,55	3,31	-1,7	0,0013	0,0262	Frat2
Zfp358	5,58	6,35	-1,7	0,0059	0,0670	Zfp358
Abcg2	4,65	5,42	-1,7	0,0001	0,0071	Abcg2
Fam212a	7,59	8,36	-1,7	0,0009	0,0213	Fam212a
Lbx2	0,66	1,43	-1,71	0,0026	0,0396	Lbx2
Zfp532	5,05	5,82	-1,71	0,0004	0,0125	Zfp532
Pik3r1	7,85	8,62	-1,71	0,0004	0,0134	Pik3r1
LOC108169124	0,97	1,74	-1,71	0,0095	0,0892	LOC108169124
Myl2	3,63	4,4	-1,71	0,0075	0,0774	Myl2
Shmt1	2,5	3,27	-1,71	0,0071	0,0750	Shmt1
Exog	4,38	5,16	-1,71	0,0022	0,0354	Exog
Galm	4,51	5,28	-1,71	0,0025	0,0395	Galm
Klrd1	0,21	0,98	-1,71	0,0204	0,1430	Klrd1
Ak6	1,34	2,11	-1,71	0,0087	0,0840	Ak6
Kctd12	6,6	7,38	-1,71	0,0004	0,0129	Kctd12
Evi5	4,64	5,42	-1,71	0,0013	0,0270	Evi5
Hmga2-ps1	6,46	7,23	-1,72	0,0018	0,0323	Hmga2-ps1
Golm1	9,47	10,25	-1,72	1,07E-06	0,0008	Golm1
Abl1	8,51	9,29	-1,72	0,0139	0,1124	Abl1
Acvr2b	5,27	6,06	-1,72	0,0029	0,0430	Acvr2b
Mpeg1	5,64	6,43	-1,72	0,0010	0,0222	Mpeg1
Epn2	4,65	5,43	-1,72	1,49E-05	0,0022	Epn2
Nrm	5,76	6,55	-1,72	6,56E-05	0,0047	Nrm
Gm36774	0,69	1,47	-1,72	0,0095	0,0886	Gm36774
Arap2	3,03	3,82	-1,73	0,0047	0,0588	Arap2
Frmd8	5,14	5,92	-1,73	0,0001	0,0069	Frmd8
Fhit	4,2	4,99	-1,73	0,0049	0,0594	Fhit
Bsn	3,84	4,63	-1,73	0,0254	0,1653	Bsn
Zfp652	6,35	7,14	-1,73	0,0105	0,0945	Zfp652
Msrb2	5,47	6,26	-1,73	0,0043	0,0550	Msrb2
Glrp1	1,91	2,7	-1,73	0,0306	0,1857	Glrp1
Prickle1	2,07	2,87	-1,73	0,0004	0,0131	Prickle1
Map4k4	6,88	7,67	-1,73	0,0008	0,0204	Map4k4
Asb2	6,9	7,7	-1,74	0,0002	0,0079	Asb2
Gm684	0,43	1,23	-1,74	0,0177	0,1317	Gm684
Idh2	6,42	7,21	-1,74	3,13E-06	0,0010	Idh2
Ddx26b	6,2	7	-1,74	0,0059	0,0672	Ddx26b
Cmtm6	9,15	9,95	-1,74	0,0017	0,0317	Cmtm6
Scarb1	5,56	6,36	-1,74	0,0014	0,0273	Scarb1
Gm16702	0,96	1,76	-1,74	0,0047	0,0583	Gm16702
Mylip	8,19	9	-1,75	0,0015	0,0293	Mylip
Klf15	0,21	1,01	-1,75	0,0029	0,0427	Klf15
Dennd4a	6,96	7,77	-1,75	0,0029	0,0426	Dennd4a
Tbc1d4	3,74	4,55	-1,75	0,0019	0,0330	Tbc1d4
Mettl7a1	4,83	5,64	-1,75	0,0053	0,0629	Mettl7a1
Zfp691	5,38	6,2	-1,76	0,0007	0,0176	Zfp691
Lactb2	3,11	3,93	-1,76	0,0012	0,0250	Lactb2
Uggt2	0,85	1,66	-1,76	0,0008	0,0192	Uggt2
Asap3	7,31	8,12	-1,76	0,0216	0,1487	Asap3
Naalad2	3,78	4,59	-1,76	0,0293	0,1815	Naalad2
Lrig3	4,01	4,82	-1,76	0,0026	0,0397	Lrig3
Plvap	2,64	3,46	-1,76	0,0008	0,0200	Plvap
Rab6b	5,75	6,57	-1,77	0,0002	0,0094	Rab6b
Prpsap2	6,37	7,19	-1,77	0,0001	0,0072	Prpsap2
Tspan9	4,68	5,5	-1,77	0,0007	0,0188	Tspan9
Olfr1034	0,11	0,93	-1,77	0,0093	0,0875	Olfr1034
Pafah1b1	3,36	4,18	-1,77	0,0292	0,1809	Pafah1b1
Dip2b	7,67	8,5	-1,77	0,0004	0,0126	Dip2b
Fam133b	3,67	4,5	-1,77	0,0182	0,1335	Fam133b
Mb21d2	0,81	1,63	-1,78	0,0083	0,0817	Mb21d2
Magi1	5,42	6,25	-1,78	0,0185	0,1353	Magi1
Fkbp14	3,21	4,04	-1,78	0,0198	0,1408	Fkbp14
Cds1	7,19	8,02	-1,78	0,0001	0,0073	Cds1
2700081O15Rik	3,56	4,4	-1,79	0,0023	0,0373	2700081O15Rik
Pdk1	3,22	4,06	-1,79	0,0107	0,0957	Pdk1
Ric3	4,28	5,12	-1,79	0,0033	0,0469	Ric3
Pbx1	3,3	4,15	-1,79	0,0075	0,0774	Pbx1
A230056P14Rik	1,66	2,5	-1,79	0,0036	0,0498	A230056P14Rik
Usp24	5,3	6,14	-1,79	0,0008	0,0199	Usp24
Maged2	2,99	3,83	-1,79	0,0040	0,0527	Maged2
B4galt4	7,07	7,92	-1,8	0,0001	0,0064	B4galt4
Rras2	3,96	4,81	-1,81	0,0082	0,0815	Rras2
Usp2	8,47	9,33	-1,81	0,0004	0,0132	Usp2
Sort1	6,55	7,4	-1,81	0,0107	0,0959	Sort1
Rbbp9	5,8	6,66	-1,81	4,79E-05	0,0039	Rbbp9
Fam131a	4,49	5,34	-1,81	0,0006	0,0170	Fam131a
Fam91a1	5,41	6,26	-1,81	0,0086	0,0833	Fam91a1
Calm2	8,94	9,79	-1,81	5,16E-05	0,0042	Calm2
Irf4	4,05	4,91	-1,81	1,97E-05	0,0026	Irf4
Rdh12	0,28	1,14	-1,82	0,0050	0,0608	Rdh12
Coro2a	5,4	6,26	-1,82	0,0007	0,0183	Coro2a
4930487H11Rik	3,09	3,95	-1,82	0,0163	0,1248	4930487H11Rik
Prkg1	0,46	1,33	-1,82	0,0234	0,1570	Prkg1
Kcnd1	7,05	7,91	-1,83	0,0024	0,0382	Kcnd1
Asb10	3,89	4,76	-1,83	0,0021	0,0348	Asb10
Clec4a4	0,87	1,74	-1,83	0,0230	0,1552	Clec4a4
Vprbp	4,36	5,24	-1,83	0,0004	0,0137	Vprbp
Casp3	5,45	6,33	-1,83	0,0007	0,0189	Casp3
Tspan13	5,67	6,55	-1,83	0,0027	0,0412	Tspan13
Lactb	4,59	5,47	-1,84	0,0109	0,0970	Lactb
Mlxipl	8,26	9,15	-1,84	0,0030	0,0434	Mlxipl
Efcab6	0,28	1,16	-1,84	0,0052	0,0619	Efcab6
Klk8	5,25	6,13	-1,84	0,0061	0,0682	Klk8
Gm572	0,98	1,86	-1,85	0,0288	0,1793	Gm572
Mir17hg	2,71	3,6	-1,85	0,0009	0,0207	Mir17hg
Rilpl1	6,53	7,42	-1,85	0,0034	0,0471	Rilpl1
Gm7694	3,51	4,39	-1,85	0,0101	0,0924	Gm7694
Naa35	5,87	6,75	-1,85	0,0005	0,0151	Naa35
Mmp23	3	3,88	-1,85	0,0017	0,0306	Mmp23
Dapp1	6,42	7,31	-1,85	0,0005	0,0156	Dapp1
Erf	7,81	8,69	-1,85	0,0008	0,0194	Erf
Gspt1	6,83	7,72	-1,85	0,0034	0,0475	Gspt1
Sh2d5	1,6	2,49	-1,85	0,0064	0,0705	Sh2d5
Cdk5r1	7,56	8,45	-1,85	0,0002	0,0091	Cdk5r1
Vangl2	4,05	4,94	-1,85	0,0026	0,0404	Vangl2
Stxbp5	3,73	4,62	-1,86	0,0006	0,0162	Stxbp5
Rec114	1,19	2,08	-1,86	0,0168	0,1276	Rec114
Kcp	1,05	1,94	-1,86	0,0099	0,0916	Kcp
Ltb	1,91	2,81	-1,87	0,0005	0,0142	Ltb
Ptprm	6,28	7,18	-1,87	0,0007	0,0179	Ptprm
Fam171a1	0,79	1,69	-1,87	0,0021	0,0354	Fam171a1
Cry1	1,4	2,3	-1,87	0,0078	0,0792	Cry1
Maml3	5,75	6,65	-1,87	0,0066	0,0718	Maml3
Thrsp	5,36	6,26	-1,87	0,0001	0,0071	Thrsp
Gpr34	9,41	10,31	-1,87	0,0006	0,0174	Gpr34
Ablim1	3,79	4,69	-1,87	0,0105	0,0950	Ablim1
Eef2k	6,52	7,42	-1,87	0,0017	0,0312	Eef2k
Klhl7	4,64	5,55	-1,88	6,85E-05	0,0049	Klhl7
Sox4	6,52	7,42	-1,88	0,0080	0,0802	Sox4
Srl	3,84	4,75	-1,88	0,0012	0,0250	Srl
Dock9	6,35	7,26	-1,88	0,0006	0,0161	Dock9
Cbfa2t3	5,37	6,28	-1,88	0,0014	0,0282	Cbfa2t3
Marveld2	2,46	3,37	-1,88	0,0026	0,0405	Marveld2
Rfx3	3,51	4,42	-1,88	1,71E-05	0,0023	Rfx3
Chst7	5,62	6,53	-1,88	0,0004	0,0135	Chst7
Eepd1	5,25	6,17	-1,88	0,0031	0,0451	Eepd1
Siglech	9,7	10,61	-1,88	5,94E-05	0,0044	Siglech
Lemd3	4,45	5,36	-1,89	0,0058	0,0667	Lemd3
Hspb3	4,66	5,58	-1,89	0,0005	0,0151	Hspb3
Cnn2	3,93	4,85	-1,89	0,0004	0,0134	Cnn2
Thnsl2	1,67	2,59	-1,89	0,0325	0,1934	Thnsl2
LOC108167986	0,11	1,03	-1,89	0,0032	0,0457	LOC108167986
Afm	0,93	1,85	-1,9	0,0004	0,0134	Afm
Ccdc85c	3,93	4,85	-1,9	0,0009	0,0215	Ccdc85c
Add3	6,38	7,31	-1,9	0,0048	0,0589	Add3
Cd101	3,23	4,15	-1,9	0,0203	0,1429	Cd101
Nr3c2	3,05	3,98	-1,9	0,0016	0,0305	Nr3c2
Nfia	6,33	7,26	-1,9	1,71E-07	0,0005	Nfia
Atmin	4,22	5,15	-1,91	0,0002	0,0096	Atmin
Gem	1,34	2,28	-1,91	0,0028	0,0418	Gem
Zfp69	3,28	4,22	-1,91	0,0007	0,0180	Zfp69
Khk	5,65	6,59	-1,91	0,0001	0,0064	Khk
Rhob	10,12	11,06	-1,91	0,0001	0,0069	Rhob
Vopp1	1,35	2,29	-1,92	0,0002	0,0080	Vopp1
Rbm38	5,97	6,91	-1,92	0,0006	0,0176	Rbm38
Tead3	4,03	4,97	-1,92	0,0001	0,0070	Tead3
Tle3	6,89	7,83	-1,92	1,23E-06	0,0008	Tle3
Bhlhb9	2,42	3,36	-1,92	0,0079	0,0798	Bhlhb9
Cxxc5	8,1	9,05	-1,92	5,66E-05	0,0043	Cxxc5
Itgb3	5,72	6,67	-1,93	0,0027	0,0414	Itgb3
Atp6v0a2	6,83	7,78	-1,94	0,0022	0,0355	Atp6v0a2
Edem1	7,35	8,31	-1,94	0,0004	0,0131	Edem1
Pde4d	2,29	3,25	-1,94	0,0006	0,0168	Pde4d
Zfp454	0,45	1,41	-1,94	0,0331	0,1950	Zfp454
Narf	5,28	6,23	-1,94	0,0071	0,0750	Narf
Zcwpw1	2,43	3,39	-1,94	0,0019	0,0334	Zcwpw1
Pik3r5	7,2	8,16	-1,95	0,0009	0,0205	Pik3r5
Efnb1	3,73	4,69	-1,95	0,0002	0,0077	Efnb1
Gm36529	0,82	1,78	-1,95	0,0256	0,1658	Gm36529
Ceacam1	6,31	7,28	-1,95	0,0158	0,1218	Ceacam1
Ptgfrn	3,52	4,48	-1,95	0,0237	0,1587	Ptgfrn
Fscn1	7,54	8,51	-1,96	0,0002	0,0099	Fscn1
Pxk	5,59	6,56	-1,96	0,0003	0,0116	Pxk
Sema4b	3,89	4,86	-1,96	0,0005	0,0146	Sema4b
Vis1	2,79	3,76	-1,96	0,0003	0,0117	Vis1
Bmp1	3,43	4,41	-1,97	0,0011	0,0242	Bmp1
Qprt	1,59	2,57	-1,98	0,0005	0,0144	Qprt
Grrp1	0,15	1,14	-1,98	0,0214	0,1477	Grrp1
Pim2	3,9	4,88	-1,98	0,0004	0,0126	Pim2
Zfp57	0,56	1,54	-1,98	0,0025	0,0395	Zfp57
Sall3	7,4	8,39	-1,98	9,08E-05	0,0058	Sall3
Rab3ip	3,56	4,54	-1,98	2,36E-07	0,0005	Rab3ip
Pfn1	9,74	10,73	-1,98	8,79E-05	0,0057	Pfn1
Gm30794	1,2	2,19	-1,98	0,0132	0,1089	Gm30794
Ccdc8	2,71	3,71	-1,99	0,0044	0,0556	Ccdc8
Ldhb	6,52	7,51	-1,99	0,0003	0,0121	Ldhb
Tcaf1	1,56	2,56	-1,99	0,0073	0,0759	Tcaf1
Parp16	2,25	3,24	-1,99	0,0011	0,0237	Parp16
Tspan18	3,97	4,97	-2	0,0036	0,0497	Tspan18
Rab27a	6,44	7,44	-2	0,0002	0,0082	Rab27a
Nav2	6,28	7,29	-2	0,0005	0,0144	Nav2
Fchsd2	6,84	7,84	-2	9,02E-06	0,0017	Fchsd2
Slc40a1	6,13	7,14	-2	8,65E-06	0,0017	Slc40a1
Neurl1a	3,93	4,93	-2,01	0,0103	0,0936	Neurl1a
Zbtb18	5,68	6,69	-2,01	3,15E-05	0,0031	Zbtb18
Ddit4	5,3	6,31	-2,02	0,0126	0,1060	Ddit4
S100a10	1,13	2,14	-2,02	0,0099	0,0911	S100a10
Ccr6	2,9	3,92	-2,03	0,0004	0,0141	Ccr6
St3gal2	5,86	6,88	-2,03	0,0066	0,0718	St3gal2
Gm32645	3,08	4,11	-2,03	0,0329	0,1943	Gm32645
Prkce	4,35	5,37	-2,03	6,78E-05	0,0049	Prkce
Stradb	2,73	3,76	-2,03	0,0058	0,0667	Stradb
Ocln	2,03	3,05	-2,03	0,0042	0,0544	Ocln
Adamtsl2	2,72	3,74	-2,04	0,0024	0,0387	Adamtsl2
Iqch	0,11	1,14	-2,04	0,0028	0,0425	Iqch
Slc24a3	5,14	6,17	-2,04	0,0055	0,0643	Slc24a3
Mpv17l	2,75	3,78	-2,04	0,0264	0,1690	Mpv17l
Mras	5	6,04	-2,05	0,0038	0,0511	Mras
Tmem144	5,18	6,21	-2,05	2,47E-05	0,0028	Tmem144
Nid2	5,03	6,07	-2,05	0,0012	0,0251	Nid2
Agmo	6,44	7,48	-2,05	2,48E-05	0,0028	Agmo
Peg10	0,72	1,76	-2,05	0,0097	0,0899	Peg10
Tmem263	0,31	1,35	-2,06	0,0012	0,0255	Tmem263
Dmrtb1	1,49	2,54	-2,06	0,0183	0,1344	Dmrtb1
Ccdc62	2,03	3,07	-2,06	0,0275	0,1738	Ccdc62
Eno3	2,95	4	-2,07	0,0095	0,0889	Eno3
Adcy6	3,12	4,17	-2,07	0,0009	0,0206	Adcy6
LOC102632541	0	1,05	-2,07	0,0004	0,0137	LOC102632541
Plpp1	6,08	7,13	-2,07	0,0050	0,0602	Plpp1
Slc12a2	7,44	8,49	-2,07	3,50E-07	0,0005	Slc12a2
Afap1l1	6,14	7,19	-2,07	0,0022	0,0361	Afap1l1
LOC108167732	5,07	6,13	-2,07	0,0296	0,1825	LOC108167732
Spin4	0,32	1,38	-2,08	0,0290	0,1800	Spin4
Ppp1r9a	6,41	7,46	-2,08	0,0001	0,0072	Ppp1r9a
Tspan7	7,23	8,29	-2,08	2,76E-05	0,0030	Tspan7
Dclk2	3,32	4,38	-2,08	0,0002	0,0082	Dclk2
Slc38a9	3,11	4,17	-2,08	0,0311	0,1878	Slc38a9
Slc5a5	0,67	1,74	-2,09	0,0023	0,0376	Slc5a5
Serpine2	8,91	9,98	-2,09	6,51E-05	0,0047	Serpine2
Dnaja4	2,9	3,97	-2,1	0,0031	0,0449	Dnaja4
Ppp1r26	1,58	2,66	-2,11	0,0138	0,1122	Ppp1r26
5730435O14Rik	0,78	1,86	-2,11	0,0007	0,0178	5730435O14Rik
Whrn	7,79	8,87	-2,11	0,0006	0,0162	Whrn
St3gal5	6,88	7,95	-2,11	3,00E-05	0,0030	St3gal5
Siglecg	0,89	1,98	-2,12	0,0019	0,0334	Siglecg
Layn	3,18	4,26	-2,12	0,0013	0,0263	Layn
Sparc	11,32	12,4	-2,12	0,0030	0,0433	Sparc
Adra2a	0	1,08	-2,12	0,0002	0,0087	Adra2a
Cnrip1	3,58	4,67	-2,13	0,0004	0,0136	Cnrip1
Asph	8,53	9,62	-2,13	0,0003	0,0103	Asph
Gadl1	1,5	2,59	-2,13	3,47E-05	0,0033	Gadl1
Dnajc28	1,65	2,74	-2,13	0,0014	0,0276	Dnajc28
Apob	0,36	1,46	-2,14	0,0007	0,0182	Apob
Eng	7,9	9	-2,14	0,0003	0,0124	Eng
Lrrc1	1,29	2,39	-2,14	0,0108	0,0959	Lrrc1
Zfp354b	2,19	3,29	-2,15	0,0032	0,0456	Zfp354b
AI429214	2,04	3,15	-2,15	0,0084	0,0826	AI429214
Bnc2	0,84	1,95	-2,15	0,0019	0,0329	Bnc2
Bmpr1a	3,73	4,84	-2,15	4,09E-05	0,0035	Bmpr1a
Cdkn1c	3,2	4,3	-2,15	0,0014	0,0282	Cdkn1c
Cmya5	1,13	2,24	-2,15	0,0016	0,0299	Cmya5
Itgae	2,02	3,13	-2,16	2,50E-05	0,0028	Itgae
Ctnnd2	2,96	4,07	-2,17	0,0058	0,0668	Ctnnd2
Prox2	3,03	4,14	-2,17	0,0006	0,0170	Prox2
LOC108168194	0,11	1,23	-2,17	0,0003	0,0121	LOC108168194
Nos1ap	4,86	5,98	-2,17	0,0003	0,0124	Nos1ap
Myadml2	3,13	4,25	-2,17	0,0002	0,0083	Myadml2
Jup	6,11	7,23	-2,18	0,0002	0,0080	Jup
Smim1	1,73	2,85	-2,18	0,0015	0,0289	Smim1
Sdk1	4,91	6,04	-2,18	0,0019	0,0333	Sdk1
Gmpr	4,61	5,74	-2,19	0,0002	0,0085	Gmpr
Tmem64	6,2	7,34	-2,19	0,0002	0,0081	Tmem64
Mrc2	6,1	7,24	-2,2	0,0007	0,0186	Mrc2
Nynrin	3,27	4,41	-2,2	0,0003	0,0103	Nynrin
Snta1	4,26	5,4	-2,2	0,0013	0,0262	Snta1
Zfp697	2,99	4,13	-2,2	0,0089	0,0849	Zfp697
Mical3	4,43	5,58	-2,21	0,0003	0,0119	Mical3
Ccdc149	1,14	2,29	-2,22	0,0005	0,0156	Ccdc149
Tpbgl	5,52	6,67	-2,22	0,0020	0,0345	Tpbgl
Zfp641	1,62	2,77	-2,22	0,0100	0,0916	Zfp641
Lrrc75a	5,49	6,64	-2,22	0,0004	0,0134	Lrrc75a
Ptpn14	0,09	1,24	-2,22	0,0038	0,0509	Ptpn14
Plcg1	5,43	6,59	-2,23	0,0001	0,0072	Plcg1
Snn	7,63	8,79	-2,23	0,0003	0,0105	Snn
Abcb4	4,72	5,88	-2,23	0,0002	0,0099	Abcb4
Ncaph	1,36	2,52	-2,23	8,74E-05	0,0057	Ncaph
Nudt12	0,91	2,07	-2,23	0,0045	0,0571	Nudt12
Nhsl2	0,45	1,61	-2,24	0,0171	0,1289	Nhsl2
Postn	1,12	2,29	-2,24	0,0019	0,0334	Postn
Ddah2	4,76	5,93	-2,26	0,0006	0,0162	Ddah2
Zfp354c	2,79	3,97	-2,26	0,0011	0,0242	Zfp354c
Kctd12b	2,66	3,84	-2,26	0,0202	0,1421	Kctd12b
Bahcc1	3,68	4,86	-2,28	0,0026	0,0401	Bahcc1
Setbp1	1,33	2,52	-2,28	0,0015	0,0287	Setbp1
Arvcf	6,21	7,4	-2,28	7,41E-05	0,0051	Arvcf
Cecr2	0,1	1,29	-2,28	0,0158	0,1218	Cecr2
Rab34	4,48	5,67	-2,28	0,0002	0,0078	Rab34
Utp6	2,51	3,71	-2,28	0,0062	0,0689	Utp6
Nat1	0,59	1,79	-2,29	0,0007	0,0189	Nat1
Armcx2	3,79	4,98	-2,29	0,0001	0,0070	Armcx2
Zfp37	1,86	3,06	-2,3	0,0048	0,0593	Zfp37
Arsg	4,73	5,93	-2,3	4,08E-05	0,0035	Arsg
Ets1	6,78	7,98	-2,3	8,82E-05	0,0057	Ets1
Ttc9	3,09	4,3	-2,3	0,0008	0,0199	Ttc9
Numb	8,77	9,98	-2,32	2,63E-06	0,0009	Numb
Zc3h12b	2	3,21	-2,32	0,0009	0,0211	Zc3h12b
Adcy8	1,06	2,28	-2,32	0,0075	0,0774	Adcy8
Picalm	6,86	8,07	-2,32	0,0050	0,0601	Picalm
Sgce	6,07	7,29	-2,32	0,0005	0,0144	Sgce
Col27a1	5,81	7,03	-2,33	0,0027	0,0413	Col27a1
Sall1	6,96	8,18	-2,33	0,0012	0,0258	Sall1
D7Ertd443e	0,83	2,05	-2,34	0,0180	0,1331	D7Ertd443e
Dll1	1,62	2,85	-2,35	0,0113	0,0989	Dll1
Mpi	5,86	7,1	-2,35	0,0001	0,0075	Mpi
Adgra3	3,45	4,68	-2,36	0,0004	0,0127	Adgra3
Palld	1,68	2,92	-2,36	0,0005	0,0157	Palld
Arhgef25	1,52	2,77	-2,37	0,0203	0,1430	Arhgef25
Atp2c1	7,05	8,3	-2,37	0,0002	0,0077	Atp2c1
Gramd4	4,04	5,29	-2,38	0,0010	0,0231	Gramd4
Cdca7	4,66	5,91	-2,38	0,0003	0,0110	Cdca7
Fam13a	2,61	3,87	-2,38	0,0003	0,0124	Fam13a
Icos	1,58	2,85	-2,4	0,0036	0,0498	Icos
Gab1	4,89	6,16	-2,4	0,0009	0,0207	Gab1
Tet1	2,73	4	-2,41	5,16E-05	0,0042	Tet1
Gp9	3,67	4,95	-2,43	0,0002	0,0076	Gp9
Scube1	2,25	3,54	-2,43	0,0003	0,0111	Scube1
Cass4	5,15	6,45	-2,45	0,0001	0,0067	Cass4
Engase	5,52	6,81	-2,45	0,0001	0,0071	Engase
Tiam1	4,69	5,99	-2,45	9,62E-05	0,0060	Tiam1
Lrrc39	2,86	4,16	-2,46	0,0001	0,0071	Lrrc39
Zfp354a	2,92	4,23	-2,48	0,0015	0,0291	Zfp354a
Bend5	1,4	2,71	-2,49	0,0047	0,0587	Bend5
Atp8a2	7,96	9,27	-2,49	0,0005	0,0156	Atp8a2
Nav3	7,07	8,39	-2,49	7,79E-06	0,0017	Nav3
LOC108167997	0,91	2,24	-2,52	0,0106	0,0952	LOC108167997
Unc5cl	1,92	3,26	-2,52	0,0025	0,0389	Unc5cl
Eid2	2,21	3,54	-2,52	0,0058	0,0667	Eid2
Fut10	3,52	4,85	-2,52	0,0009	0,0211	Fut10
Adgrg1	8,9	10,24	-2,53	8,01E-05	0,0053	Adgrg1
Arhgap32	2,39	3,74	-2,56	0,0013	0,0270	Arhgap32
Rab4a	1,26	2,61	-2,56	0,0004	0,0133	Rab4a
Atp8b1	2,72	4,08	-2,57	0,0008	0,0204	Atp8b1
Slc1a3	5,57	6,93	-2,57	0,0007	0,0190	Slc1a3
Gm29927	1,06	2,43	-2,58	0,0117	0,1017	Gm29927
Nrarp	4,53	5,9	-2,59	2,50E-05	0,0028	Nrarp
Cx3cr1	10,3	11,68	-2,6	0,0003	0,0108	Cx3cr1
Ackr3	0,65	2,03	-2,6	0,0037	0,0502	Ackr3
Bcl9l	6,79	8,17	-2,61	3,97E-05	0,0035	Bcl9l
Cdc42ep1	0,31	1,69	-2,61	0,0034	0,0481	Cdc42ep1
Dpy19l3	2,23	3,62	-2,62	0,0003	0,0117	Dpy19l3
Gimap9	1,03	2,42	-2,62	2,81E-05	0,0030	Gimap9
Clec4a3	3,58	4,98	-2,64	0,0084	0,0826	Clec4a3
Efnb2	1,8	3,2	-2,64	0,0011	0,0243	Efnb2
Prkca	4,76	6,16	-2,65	8,27E-05	0,0054	Prkca
Duoxa1	2,23	3,64	-2,65	0,0033	0,0463	Duoxa1
Pnma2	0,43	1,84	-2,66	0,0008	0,0195	Pnma2
Jam2	5,81	7,22	-2,66	0,0002	0,0077	Jam2
Ecscr	7,58	9	-2,69	1,43E-05	0,0022	Ecscr
Tppp	5,31	6,74	-2,7	0,0001	0,0070	Tppp
Sema4g	7,28	8,72	-2,71	2,51E-05	0,0028	Sema4g
Actn1	4,46	5,9	-2,71	0,0003	0,0116	Actn1
Casc4	1,09	2,53	-2,72	0,0004	0,0138	Casc4
Stk26	0,7	2,14	-2,72	0,0065	0,0707	Stk26
Igf1r	4,61	6,06	-2,73	4,17E-05	0,0036	Igf1r
Ccnjl	0,3	1,76	-2,76	0,0076	0,0781	Ccnjl
Nbl1	2,06	3,53	-2,76	0,0002	0,0082	Nbl1
Jam3	3,84	5,31	-2,76	1,09E-05	0,0018	Jam3
Gm30789	3,26	4,73	-2,77	0,0016	0,0301	Gm30789
Gm3134	4	5,47	-2,77	2,90E-05	0,0030	Gm3134
Slc2a5	6,46	7,93	-2,78	0,0007	0,0180	Slc2a5
Dlc1	1,09	2,57	-2,79	0,0003	0,0121	Dlc1
Gabbr1	5,39	6,88	-2,8	0,0002	0,0102	Gabbr1
Hsf2bp	2,67	4,16	-2,8	0,0001	0,0064	Hsf2bp
Lamb2	3,8	5,28	-2,8	3,84E-05	0,0034	Lamb2
Ppm1e	0,86	2,34	-2,8	0,0178	0,1319	Ppm1e
Kcnk12	3,46	4,95	-2,82	0,0002	0,0099	Kcnk12
Npl	5,29	6,79	-2,84	2,30E-06	0,0009	Npl
Nova1	1,84	3,36	-2,88	0,0005	0,0155	Nova1
Tgfa	5,22	6,75	-2,88	0,0002	0,0098	Tgfa
Fgf11	3,48	5,02	-2,89	0,0015	0,0295	Fgf11
Gm15880	0,47	2,01	-2,91	0,0009	0,0205	Gm15880
Lgi4	3,28	4,84	-2,96	0,0025	0,0389	Lgi4
Elavl4	2,55	4,12	-2,96	0,0026	0,0401	Elavl4
Nrep	2,52	4,09	-2,97	0,0034	0,0479	Nrep
P3h2	6,88	8,45	-2,98	1,14E-05	0,0019	P3h2
Prox1	2,91	4,48	-2,98	0,0007	0,0189	Prox1
Rtn4rl1	7,16	8,74	-2,98	0,0001	0,0065	Rtn4rl1
Ccl9	6,66	8,24	-2,99	0,0004	0,0137	Ccl9
Hnmt	3,7	5,28	-2,99	4,06E-05	0,0035	Hnmt
Ncs1	2,64	4,22	-2,99	0,0001	0,0070	Ncs1
Mycl	4,77	6,36	-3	0,0005	0,0144	Mycl
Plcl1	5,42	7,01	-3,01	0,0003	0,0118	Plcl1
Adamts16	4,09	5,7	-3,05	0,0004	0,0132	Adamts16
Yes1	2,6	4,21	-3,05	0,0003	0,0112	Yes1
Kng2	0,9	2,51	-3,06	9,10E-05	0,0058	Kng2
Tbx19	0,81	2,43	-3,07	0,0021	0,0347	Tbx19
Gprasp2	0,23	1,85	-3,09	0,0084	0,0825	Gprasp2
Satb1	2,61	4,24	-3,09	0,0002	0,0100	Satb1
Myo6	2,81	4,45	-3,12	0,0029	0,0430	Myo6
Gm36365	6,8	8,44	-3,12	4,02E-06	0,0011	Gm36365
Mmp15	2,45	4,1	-3,13	0,0006	0,0162	Mmp15
Gpd1	3,56	5,23	-3,17	0,0006	0,0172	Gpd1
Gimap1	1,96	3,63	-3,18	4,66E-05	0,0039	Gimap1
Vangl1	1,33	3,02	-3,23	0,0070	0,0741	Vangl1
Thsd1	1,83	3,53	-3,24	1,41E-05	0,0022	Thsd1
Farp1	2,91	4,61	-3,26	9,22E-05	0,0059	Farp1
Zfp827	2,68	4,39	-3,27	0,0007	0,0185	Zfp827
Tmem204	4,35	6,06	-3,28	0,0004	0,0126	Tmem204
Slc36a2	1	2,72	-3,31	0,0062	0,0693	Slc36a2
Apobec2	0,12	1,89	-3,43	9,70E-06	0,0018	Apobec2
Gimap6	3,01	4,79	-3,43	0,0001	0,0065	Gimap6
Klhl3	3,85	5,64	-3,45	5,50E-05	0,0043	Klhl3
Perp	0,89	2,69	-3,46	0,0004	0,0132	Perp
Mgll	3,27	5,06	-3,46	4,77E-06	0,0012	Mgll
Gm10790	5,39	7,19	-3,49	3,52E-06	0,0010	Gm10790
Slc16a9	0,5	2,31	-3,51	0,0077	0,0782	Slc16a9
Mmp28	0,77	2,61	-3,57	0,0001	0,0073	Mmp28
Cux2	2,38	4,24	-3,64	0,0003	0,0116	Cux2
Klhl38	2,58	4,46	-3,67	0,0002	0,0080	Klhl38
Tmc7	5,21	7,12	-3,76	1,60E-05	0,0022	Tmc7
Slc39a12	2,73	4,64	-3,76	1,07E-05	0,0018	Slc39a12
Zswim5	1,22	3,17	-3,87	0,0017	0,0310	Zswim5
Upk1b	5,99	7,95	-3,9	0,0001	0,0075	Upk1b
Chst8	4,41	6,37	-3,9	0,0005	0,0147	Chst8
Khdrbs3	2,05	4,05	-4	0,0005	0,0159	Khdrbs3
Crybb1	5,94	7,95	-4,04	5,51E-05	0,0043	Crybb1
Ccdc162	3,23	5,26	-4,08	0,0003	0,0119	Ccdc162
Pard3b	2,58	4,62	-4,11	0,0009	0,0208	Pard3b
Slc43a1	1,15	3,22	-4,22	0,0004	0,0132	Slc43a1
Rgs7bp	2,68	4,81	-4,36	2,01E-05	0,0026	Rgs7bp
Igf2bp2	2,11	4,27	-4,47	0,0001	0,0071	Igf2bp2
Dusp27	2,72	4,88	-4,49	3,78E-05	0,0034	Dusp27
Ptger3	0,44	2,63	-4,55	2,29E-05	0,0027	Ptger3
Csmd3	3,97	6,18	-4,61	0,0005	0,0151	Csmd3
Cd79b	3,52	5,72	-4,62	6,52E-06	0,0015	Cd79b
LOC108168886	3,6	5,83	-4,69	7,97E-06	0,0017	LOC108168886
Eva1a	2,37	4,61	-4,7	0,0002	0,0082	Eva1a
Ppm1l	4,36	6,59	-4,7	9,05E-06	0,0017	Ppm1l
Tmem44	5,34	7,57	-4,71	0,0001	0,0065	Tmem44
Lypd6	1,18	3,43	-4,76	3,13E-06	0,0010	Lypd6
Mlph	5,28	7,55	-4,81	5,82E-05	0,0044	Mlph
Cdh23	3,92	6,21	-4,92	1,35E-06	0,0008	Cdh23
[truncated: 16 more rows]

## Sheet: Inflammation vs Pfn1 DE's
ID	flfl cre+ Avg (log2)	flfl Avg (log2)	Fold Change	P-val	FDR P-val	Gene Symbol	Description			Inflammation vs DE's			By Fold Change
Gdf3	7,3	0,11	145,95	8,63E-07	0,0007	Gdf3				Nrarp			Top 5 Upregulated	Sample Signals (log2)
Cxcr4	8,38	1,25	140	5,17E-06	0,0013	Cxcr4				Gpr165				fl/fl	fl/fl	fl/fl	fl/fl Cre+	fl/fl Cre+	fl/fl Cre+
Tlr8	7,2	0,11	136,45	2,84E-07	0,0005	Tlr8				Nav3			Cybb	1,78	1,58	2,87	8,46	8,25	7,97
Ms4a4a	7,37	0,31	133,68	2,26E-07	0,0005	Ms4a4a				Rhob			Apoe	4,67	4,63	4,55	11,1	11,07	11,05
Clec12a	7,35	0,55	111,83	3,58E-07	0,0005	Clec12a				Cd274			Cyp4f18	0,37	0,8	0,97	6,44	6,54	6,31
Ms4a7	7,14	0,37	108,8	2,44E-07	0,0005	Ms4a7				Ppm1l			Pla2g7	1,51	2,32	1,67	7,01	6,91	6,86
Itgal	7,43	0,84	96,25	3,92E-06	0,0011	Itgal				Mycl			Ehd1	1,58	1,78	2,08	6,67	6,52	6,79
Cybb	8,24	1,68	93,89	5,77E-05	0,0044	Cybb				Ebf3
Apoe	11,07	4,62	87,24	1,31E-09	3,13E-05	Apoe				Zfpm1			Top 5 Downregulated	Sample Signals (log2)
Runx3	6,33	0,13	73,67	4,18E-07	0,0006	Runx3				Usp2				fl/fl	fl/fl	fl/fl	fl/fl Cre+	fl/fl Cre+	fl/fl Cre+
Klra2	6,36	0,18	72,36	6,32E-07	0,0007	Klra2				Plxdc2			Myo18b	6,7	6,41	6,36	2,74	2,29	3,36
Ifi203	6,46	0,37	67,88	3,45E-08	0,0003	Ifi203				Nrep			Gpr165	5,94	6,06	5,76	2,35	2,53	2,37
Plbd1	6,2	0,27	60,71	9,12E-07	0,0007	Plbd1				A230056P14Rik			Col6a3	4,67	3,73	4,31	1,73	1,16	1,22
Mndal	6,21	0,29	60,7	4,78E-07	0,0006	Mndal				Sox4			Mdfi	6,93	6,78	6,76	3,99	3,96	3,6
Cyp4f18	6,44	0,76	51,04	2,41E-06	0,0009	Cyp4f18				Nrp1			Tnfrsf17	4,86	4,8	4,95	2,08	2,53	2,07
Ms4a14	5,66	0	50,64	4,28E-06	0,0012	Ms4a14				Ier2
Siglec1	8,42	2,83	48,16	4,68E-05	0,0039	Siglec1				Tlr2
Serpinb8	5,67	0,11	47,2	1,50E-06	0,0008	Serpinb8				Cbfa2t3
H2-Eb1	8,66	3,15	45,54	3,85E-05	0,0034	H2-Eb1				Ccl7
Slamf7	5,73	0,25	44,79	2,30E-05	0,0027	Slamf7				Fam212a
Itga4	6,75	1,35	42,26	4,55E-06	0,0012	Itga4				Sorl1
Pf4	7,06	1,71	40,97	4,69E-08	0,0003	Pf4				Ccl12
H2-Aa	8,27	2,96	39,67	8,51E-05	0,0056	H2-Aa				Nfkbia
Pla2g7	6,92	1,65	38,76	1,34E-05	0,0021	Pla2g7				Cacfd1
Cmah	5,4	0,21	36,5	1,68E-07	0,0005	Cmah				Ldhb
Myof	5,42	0,26	35,7	2,37E-06	0,0009	Myof				Il6st
Ptger4	6,8	1,66	35,19	1,98E-06	0,0008	Ptger4				Ms4a4c
Axl	9,19	4,07	34,88	0,0001	0,0065	Axl				Tor3a
Sorbs3	6,85	1,75	34,26	1,29E-06	0,0008	Sorbs3				Gm4951
Ahr	5,38	0,29	34	2,52E-06	0,0009	Ahr				Rrp1b
Cd36	5,41	0,34	33,73	1,40E-06	0,0008	Cd36				Cx3cr1
Ctse	5,92	0,86	33,4	2,12E-08	0,0003	Ctse				Khdrbs3
Ehd1	6,66	1,8	29,01	2,71E-06	0,0009	Ehd1				Cd52
Vcam1	7,61	2,77	28,64	8,28E-05	0,0054	Vcam1				Magi1
Cd74	10,82	6,1	26,46	9,85E-06	0,0018	Cd74				Engase
Ccnd2	5,35	0,67	25,66	3,96E-05	0,0035	Ccnd2				Dab2
Cp	5,3	0,67	24,75	9,15E-07	0,0007	Cp				Cpd
Oas2	7,59	2,98	24,43	0,0024	0,0387	Oas2				Ppp1r9a
AI607873	7,14	2,54	24,25	0,0009	0,0205	AI607873				Rasa2
Adam19	5,19	0,62	23,7	1,36E-05	0,0021	Adam19				Mrc2
Cd93	4,55	0	23,42	5,78E-07	0,0007	Cd93				Crybb1
Mrc1	8,67	4,15	22,93	2,63E-06	0,0009	Mrc1				Pla2g7
Pydc4	6,01	1,52	22,41	0,0038	0,0509	Pydc4				Gab1
Emilin1	6,07	1,62	21,83	3,00E-05	0,0030	Emilin1				Arvcf
Lyz2	12,77	8,37	21,17	1,54E-06	0,0008	Lyz2				Cadm1
H2-Ab1	8,15	3,76	20,98	6,21E-05	0,0046	H2-Ab1				Fcgr4
Ifi44	4,5	0,15	20,32	0,0016	0,0298	Ifi44				Ddah2
Jag1	5,35	1,03	20,01	8,26E-07	0,0007	Jag1				Fos
Igf1	5,17	0,94	18,7	6,26E-06	0,0014	Igf1				St3gal5
Reps2	5,05	0,86	18,34	3,70E-06	0,0011	Reps2				Smim14
Trps1	6,21	2,04	18,04	4,22E-07	0,0006	Trps1				AI504432
Aoah	4,52	0,48	16,48	7,76E-05	0,0052	Aoah				Adamts16
F630028O10Rik	5,05	1,02	16,31	1,13E-05	0,0019	F630028O10Rik				Sh3bgrl
C3	5,85	1,83	16,28	0,0004	0,0131	C3				Kcnk12
Oas1g	5,41	1,41	16	0,0010	0,0232	Oas1g				Ybx1
Cdc42bpg	5,61	1,64	15,68	7,26E-05	0,0050	Cdc42bpg				C3ar1
Lgals1	5,98	2,03	15,45	1,28E-06	0,0008	Lgals1				Igfbp4
Dach1	4,06	0,11	15,43	9,85E-06	0,0018	Dach1				Idh2
Acp5	4,29	0,35	15,36	1,36E-05	0,0021	Acp5				Mertk
Gpr65	5,92	1,99	15,22	1,78E-05	0,0024	Gpr65				Vps13c
Cpne2	5,65	1,73	15,17	9,47E-07	0,0007	Cpne2				Eng
Oas3	4,97	1,07	14,91	0,0086	0,0832	Oas3				Kcnd1
Ccr1	7,44	3,55	14,86	9,75E-06	0,0018	Ccr1				Zbp1
Clec4n	3,88	0	14,72	4,55E-06	0,0012	Clec4n				Arhgap31
Stap1	4,06	0,2	14,5	1,49E-06	0,0008	Stap1				Ms4a6c
Cd300lf	6,76	2,91	14,45	0,0002	0,0085	Cd300lf				Asph
Gpr31b	5,04	1,29	13,52	0,0001	0,0071	Gpr31b				Mylip
Dram1	4,54	0,79	13,44	1,91E-06	0,0008	Dram1				Tmem106a
Arhgap15	5,99	2,25	13,39	3,76E-06	0,0011	Arhgap15				Atp8a2
Iqgap2	4,38	0,69	12,95	7,40E-05	0,0051	Iqgap2				Tanc2
Antxr2	4,49	0,79	12,91	1,87E-05	0,0025	Antxr2				Nfia
Vnn3	3,69	0	12,88	3,08E-07	0,0005	Vnn3				Elmo1
Clec2i	4,79	1,1	12,84	1,56E-05	0,0022	Clec2i				Msrb2
Pdpn	3,77	0,11	12,61	2,73E-05	0,0029	Pdpn				Yes1
Sirpb1b	3,65	0	12,54	9,08E-08	0,0004	Sirpb1b				Ncaph
Nlrc4	3,75	0,11	12,47	1,13E-05	0,0019	Nlrc4				Eid2
Thbd	3,76	0,12	12,41	8,81E-06	0,0017	Thbd				Nav2
Tmem221	7,01	3,38	12,39	5,31E-07	0,0006	Tmem221				Gadd45g
Ciita	4,14	0,61	11,55	0,0007	0,0179	Ciita				Gm6904
Fgf2	6,28	2,79	11,21	6,23E-05	0,0046	Fgf2				Cdkn1c
Qpct	4,54	1,07	11,05	1,74E-06	0,0008	Qpct				Cd300ld
Rara	3,98	0,54	10,85	4,03E-06	0,0011	Rara				Oasl1
Slc2a6	6,06	2,64	10,71	0,0001	0,0073	Slc2a6				Emp3
Sash1	4,94	1,52	10,68	2,79E-05	0,0030	Sash1				Cnot8
Sh3pxd2b	4,67	1,27	10,54	1,87E-06	0,0008	Sh3pxd2b				Ddx26b
Ch25h	3,75	0,36	10,48	9,57E-06	0,0018	Ch25h				Aplp2
Mdfic	5,93	2,55	10,44	2,99E-06	0,0010	Mdfic				Apobec1
Emilin2	3,74	0,41	9,99	5,79E-06	0,0014	Emilin2				Hhex
Dab2	8,71	5,4	9,92	2,41E-05	0,0028	Dab2				Liph
Tmem51	3,5	0,19	9,9	6,80E-05	0,0049	Tmem51				Galnt7
Itsn1	6,52	3,23	9,78	0,0001	0,0064	Itsn1				Fam102b
BC064078	5,15	1,89	9,6	8,28E-07	0,0007	BC064078				Rab3ip
Fgl2	7,51	4,3	9,29	0,0001	0,0068	Fgl2				Cd79b
Cd40	5,25	2,04	9,25	0,0012	0,0257	Cd40				Eid1
Nlrc3	4,2	0,99	9,25	8,49E-06	0,0017	Nlrc3				Sema6b
Cd72	8,15	4,96	9,17	7,97E-05	0,0053	Cd72				4930486L24Rik
Tnfsf8	5,7	2,54	8,93	1,70E-05	0,0023	Tnfsf8				Hlf
Plxnc1	4,37	1,23	8,8	2,82E-05	0,0030	Plxnc1				Snn
Adgrg5	3,61	0,49	8,7	6,58E-05	0,0047	Adgrg5				Irak3
Slit1	4,18	1,06	8,7	3,64E-05	0,0034	Slit1				Pard3b
Itgb8	4,15	1,04	8,61	3,75E-05	0,0034	Itgb8				Tgfa
Cd44	5,34	2,24	8,6	0,0003	0,0115	Cd44				Nlrc5
Cxcl14	3,71	0,6	8,59	0,0008	0,0204	Cxcl14				Numb
Spp1	5,51	2,41	8,55	0,0003	0,0112	Spp1				Dhx58
Gas7	4,59	1,49	8,53	2,52E-05	0,0028	Gas7				AW112010
Xdh	3,6	0,53	8,44	2,41E-05	0,0028	Xdh				Asb10
Unc119	3,28	0,23	8,31	4,26E-06	0,0012	Unc119				Chst8
Oasl1	4,12	1,07	8,27	0,0048	0,0592	Oasl1				Zfp354c
C920009B18Rik	4,59	1,54	8,26	9,34E-06	0,0018	C920009B18Rik				Galc
Ifnlr1	3,23	0,18	8,24	0,0002	0,0081	Ifnlr1				Msr1
H2-Q6	8	4,98	8,11	0,0061	0,0682	H2-Q6				Tnfrsf17
Runx2	3,76	0,75	8,08	5,45E-05	0,0043	Runx2				Ctla2b
Sh2d1b1	4,14	1,13	8,04	1,62E-05	0,0022	Sh2d1b1				Calm2
Myo5a	7,78	4,78	8,02	9,95E-06	0,0018	Myo5a				Rtp4
Bhlhe40	5,2	2,2	7,99	2,44E-05	0,0028	Bhlhe40				Soat1
Gsn	5,36	2,37	7,94	1,83E-06	0,0008	Gsn				Plk3
Kcnn4	6,76	3,8	7,78	1,41E-06	0,0008	Kcnn4				Frmd8
H2-Q7	5,61	2,67	7,69	0,0054	0,0635	H2-Q7				Eps8
Hcar2	4,2	1,28	7,56	0,0016	0,0296	Hcar2				Plekho1
Ifi204	4,86	1,95	7,49	0,0005	0,0145	Ifi204				Upk1b
Plxnd1	4,64	1,74	7,49	5,98E-05	0,0044	Plxnd1				Ypel2
Col14a1	2,9	0	7,46	0,0001	0,0072	Col14a1				Actn1
Scimp	6,33	3,45	7,37	4,57E-06	0,0012	Scimp				Slfn2
Gm33058	2,98	0,1	7,37	9,27E-07	0,0007	Gm33058				Rtcb
F13a1	4,27	1,41	7,23	0,0005	0,0152	F13a1				Pyhin1
Slc28a2	2,84	0	7,18	1,18E-05	0,0019	Slc28a2				Bst2
Zmynd15	6,4	3,59	7	0,0002	0,0098	Zmynd15				Dna2
Ccl2	5,8	3	6,96	0,0003	0,0107	Ccl2				Ccl6
Fxyd5	6,81	4,02	6,91	5,23E-05	0,0042	Fxyd5				Med12l
Cdkn2a	3,17	0,39	6,89	6,93E-05	0,0049	Cdkn2a				Sgce
P2ry14	2,88	0,1	6,84	5,70E-05	0,0043	P2ry14				Sdc3
Ms4a4c	4,51	1,75	6,82	0,0002	0,0080	Ms4a4c				Tap1
Pstpip1	5,66	2,9	6,78	2,12E-06	0,0008	Pstpip1				Dusp27
Mgst1	2,88	0,14	6,68	0,0002	0,0099	Mgst1				Slc1a3
Lox	4,53	1,8	6,63	0,0004	0,0132	Lox				Postn
Cxcl16	9,5	6,78	6,61	2,01E-05	0,0026	Cxcl16				Tmem44
Kcnab2	4,6	1,89	6,58	0,0001	0,0067	Kcnab2				Capg
Mllt4	6,2	3,48	6,57	0,0001	0,0070	Mllt4				Glul
Clec7a	9,02	6,31	6,55	1,02E-05	0,0018	Clec7a				Cd244
Tmem205	5,46	2,75	6,54	3,73E-05	0,0034	Tmem205				Gm13889
Cyfip2	5,29	2,58	6,54	6,22E-05	0,0046	Cyfip2				Golm1
Slfn4	2,69	0	6,44	5,61E-06	0,0013	Slfn4				Galm
Nedd9	4,65	1,96	6,44	4,89E-05	0,0040	Nedd9				Rab6b
Fam110b	2,92	0,24	6,44	6,91E-06	0,0015	Fam110b				Fn1
Rai14	4,62	1,96	6,32	1,08E-05	0,0018	Rai14				Acot9
Iqgap1	6,42	3,77	6,3	8,74E-06	0,0017	Iqgap1				Tom1l1
Ccl12	8,59	5,94	6,28	0,0032	0,0456	Ccl12				2610528A11Rik
Vim	4,6	1,95	6,25	1,26E-05	0,0020	Vim				Tnfaip2
Bst1	3,36	0,73	6,23	0,0038	0,0507	Bst1				Sall3
Ms4a6c	8,27	5,64	6,18	4,63E-05	0,0039	Ms4a6c				Tmem176b
C630043F03Rik	3,08	0,46	6,17	8,73E-05	0,0057	C630043F03Rik				Clec4a3
Hip1	4,78	2,2	5,98	8,79E-05	0,0057	Hip1				Whrn
Clec4d	2,56	0	5,89	0,0002	0,0082	Clec4d				Gpr65
Pde7b	2,65	0,1	5,85	7,59E-07	0,0007	Pde7b				Zfp358
Kcna3	6,64	4,09	5,84	0,0003	0,0110	Kcna3				Ccng2
LOC102639543	3,3	0,75	5,84	0,0018	0,0323	LOC102639543				P2rx4
Kalrn	4,51	2	5,7	0,0176	0,1314	Kalrn				Lyz1
Hs3st1	2,92	0,4	5,7	0,0016	0,0298	Hs3st1				Clec2d
Ldlrad3	3,6	1,1	5,66	1,35E-05	0,0021	Ldlrad3				Rtn4rl1
Gm1966	5,56	3,07	5,63	0,0001	0,0069	Gm1966				Fam167b
Adam33	2,7	0,22	5,61	0,0006	0,0174	Adam33				Cass4
Ascl4	2,68	0,2	5,6	3,01E-06	0,0010	Ascl4				Asb2
AI504432	5,27	2,78	5,6	2,15E-05	0,0026	AI504432				Ccl2
Cd300ld	3,46	0,98	5,55	0,0003	0,0111	Cd300ld				Nfxl1
Xylt1	5,43	2,97	5,5	0,0002	0,0096	Xylt1				St3gal6
Clic4	7,56	5,11	5,48	6,91E-05	0,0049	Clic4				Bin1
Folr2	4,19	1,74	5,45	0,0001	0,0073	Folr2				Rap2b
Tgfbi	9,55	7,1	5,45	1,07E-05	0,0018	Tgfbi				Srgap2
C030034L19Rik	3,15	0,71	5,43	0,0002	0,0078	C030034L19Rik				Rgs2
Kynu	3,85	1,41	5,43	7,84E-05	0,0053	Kynu				Epn2
Pltp	5,76	3,33	5,42	8,22E-05	0,0054	Pltp				2610507B11Rik
Pdlim7	4,35	1,92	5,42	0,0018	0,0322	Pdlim7				Naalad2
Serpinb6b	3,03	0,6	5,37	2,12E-05	0,0026	Serpinb6b				Jup
Bst2	9,09	6,67	5,36	5,07E-05	0,0042	Bst2				Sema4g
Lrig1	3,09	0,67	5,35	0,0010	0,0228	Lrig1				Arap2
Zbp1	4,54	2,13	5,34	0,0059	0,0670	Zbp1				Fam26f
Zc3h12d	2,8	0,39	5,31	0,0002	0,0099	Zc3h12d				Cd72
St3gal1	5,4	2,99	5,31	6,99E-05	0,0049	St3gal1				Tgfbi
Bmp2	2,4	0	5,29	2,31E-05	0,0027	Bmp2				Nupr1
Fam132a	3,42	1,02	5,28	0,0003	0,0102	Fam132a				Tmem52
Gpr132	2,64	0,24	5,25	0,0026	0,0402	Gpr132				H2-DMa
Mmp9	2,39	0	5,24	0,0086	0,0833	Mmp9				Grina
Hepacam2	2,38	0	5,19	9,49E-05	0,0059	Hepacam2				Tbc1d16
Pdcd1	7,47	5,09	5,19	4,65E-05	0,0039	Pdcd1				Zmynd15
Fzd7	4,71	2,35	5,15	8,27E-06	0,0017	Fzd7				Ero1l
Msr1	2,35	0	5,12	2,78E-05	0,0030	Msr1				Ets1
Rftn1	6,16	3,81	5,11	4,50E-05	0,0038	Rftn1				Rai14
Ccl7	2,74	0,39	5,1	0,0003	0,0124	Ccl7				Adam9
Grap2	2,35	0	5,09	8,01E-05	0,0053	Grap2				Tpd52
Map4k1	4,17	1,83	5,08	3,28E-05	0,0032	Map4k1				Egr1
Wfdc17	3,5	1,16	5,08	6,33E-05	0,0046	Wfdc17				Mlxipl
LOC100038947	2,33	0	5,03	0,0004	0,0135	LOC100038947				Oas1a
Vill	3,85	1,52	5,01	3,37E-05	0,0032	Vill				Gpr34
Cd200r4	3,73	1,41	5	3,68E-05	0,0034	Cd200r4				Picalm
Metrnl	5,46	3,14	4,96	6,03E-06	0,0014	Metrnl				Nhsl2
Spic	2,3	0	4,94	9,83E-06	0,0018	Spic				H2-K1
Arhgap10	3,54	1,24	4,93	0,0004	0,0135	Arhgap10				Atad2
Cdkn1a	6,77	4,47	4,9	0,0003	0,0105	Cdkn1a				Igf1r
Ptpn22	4,95	2,66	4,89	5,82E-05	0,0044	Ptpn22				Gimap1
Batf2	3,58	1,29	4,89	0,0011	0,0246	Batf2				Ctnnd2
Slfn1	2,33	0,05	4,86	0,0009	0,0217	Slfn1				Arhgef40
Gdpd5	6,02	3,74	4,84	2,12E-05	0,0026	Gdpd5				C5ar1
Hgf	4,07	1,8	4,83	0,0002	0,0082	Hgf				Xdh
Slc26a11	4,85	2,58	4,82	9,35E-05	0,0059	Slc26a11				Slc40a1
Gm10791	2,36	0,1	4,79	9,63E-05	0,0060	Gm10791				Phf11a
Chac1	2,86	0,6	4,79	0,0034	0,0478	Chac1				Rilpl1
Sh3d19	2,9	0,65	4,77	0,0011	0,0245	Sh3d19				Gpr84
Pxdc1	7,14	4,89	4,73	3,97E-06	0,0011	Pxdc1				Ctsd
Gk	4,22	1,98	4,73	3,84E-05	0,0034	Gk				AI607873
Fam214a	6,63	4,39	4,73	5,54E-05	0,0043	Fam214a				Bcl9l
AW112010	6,7	4,46	4,71	4,26E-05	0,0036	AW112010				St3gal2
Vav3	2,23	0	4,69	0,0002	0,0083	Vav3				Tmod3
Sh3bp4	4,01	1,79	4,68	0,0001	0,0070	Sh3bp4				Eef2k
Psd3	3,78	1,56	4,67	0,0004	0,0127	Psd3				2810025M15Rik
Cd69	2,41	0,2	4,64	0,0008	0,0192	Cd69				Fgl2
Ezr	4,82	2,62	4,61	5,63E-05	0,0043	Ezr				Ccr1
Kank2	5,82	3,62	4,6	0,0001	0,0065	Kank2				Pde2a
Oasl2	7,27	5,07	4,6	0,0073	0,0761	Oasl2				Gp9
Cyp4f17	3,57	1,39	4,54	3,69E-05	0,0034	Cyp4f17				Pbx1
Kcnh4	4,15	1,98	4,51	0,0005	0,0156	Kcnh4				Soat2
Sestd1	3,11	0,94	4,51	0,0007	0,0190	Sestd1				Tmem204
Usp18	4,82	2,66	4,46	0,0080	0,0803	Usp18				Cst7
Itgax	7,56	5,42	4,42	0,0016	0,0305	Itgax				Arglu1
Bcar3	3,48	1,34	4,41	0,0017	0,0314	Bcar3				Il1b
2310001H17Rik	3,8	1,66	4,41	0,0011	0,0245	2310001H17Rik				Cd300lf
Stom	7,22	5,1	4,35	6,28E-07	0,0007	Stom				Ifi204
Syne1	3,93	1,81	4,35	0,0015	0,0288	Syne1				Dip2b
Ifi27l2a	4,99	2,88	4,33	0,0015	0,0289	Ifi27l2a				Tnfsf13b
Tmem150b	3,72	1,61	4,31	0,0004	0,0139	Tmem150b				Rftn1
Gab3	5,44	3,33	4,31	0,0007	0,0176	Gab3				Itgb3
Rgs18	2,22	0,11	4,31	3,24E-06	0,0010	Rgs18				Mettl7a1
Lrrc8c	4,54	2,43	4,3	3,99E-05	0,0035	Lrrc8c				Pim1
Ctla2b	5,68	3,58	4,3	1,85E-06	0,0008	Ctla2b				Syt11
Zfp599	2,2	0,1	4,28	3,48E-06	0,0010	Zfp599				Mx1
Itga8	2,73	0,64	4,26	2,43E-05	0,0028	Itga8				Slc12a2
Kcnj10	7,16	5,08	4,25	5,13E-05	0,0042	Kcnj10				Lyz2
Apoc4	2,08	0	4,24	4,64E-05	0,0039	Apoc4				Myo18b
Plppr2	4,14	2,06	4,23	0,0013	0,0259	Plppr2				Pitpnc1
Tmem82	4,95	2,88	4,22	2,06E-06	0,0008	Tmem82				Gimap6
Tnik	3,6	1,53	4,21	0,0032	0,0459	Tnik				Jam3
Cd38	2,18	0,11	4,2	0,0002	0,0086	Cd38				Lgals1
Snhg11	6,88	4,81	4,19	0,0218	0,1496	Snhg11				Csnk1e
Mcam	3,7	1,63	4,19	1,60E-05	0,0022	Mcam				Kalrn
Tmem8	3,14	1,08	4,15	1,02E-05	0,0018	Tmem8				Adk
Etl4	3,59	1,54	4,14	0,0004	0,0131	Etl4				Abl1
Nostrin	2,16	0,11	4,14	0,0013	0,0259	Nostrin				Slc2a6
Emb	2,44	0,4	4,13	0,0063	0,0697	Emb				Siglech
Alcam	2,71	0,66	4,12	0,0005	0,0149	Alcam				Mmp2
LOC102632465	2,96	0,91	4,12	0,0015	0,0287	LOC102632465				Cep128
Gm32448	2,41	0,37	4,11	0,0005	0,0144	Gm32448				Mdk
Fam65b	5,64	3,61	4,1	2,75E-06	0,0009	Fam65b				Ikbke
Il1b	4,43	2,4	4,08	0,0039	0,0513	Il1b				Stat2
Gpx3	2,57	0,54	4,07	6,44E-05	0,0047	Gpx3				Rnf213
Nlrc5	6,08	4,05	4,07	0,0006	0,0165	Nlrc5				Iffo1
Pxylp1	2,87	0,85	4,06	0,0003	0,0121	Pxylp1				Prpsap2
Slc1a5	4,14	2,13	4,03	0,0002	0,0080	Slc1a5				Cdkn1a
Tmem176a	9,26	7,26	4,01	2,64E-05	0,0029	Tmem176a				Hsf2bp
Cst7	3,96	1,97	4	0,0065	0,0706	Cst7				Slfn5
Aph1b	4,05	2,06	3,99	1,74E-05	0,0024	Aph1b				Jam2
Cd244	4,08	2,08	3,99	0,0011	0,0238	Cd244				Sla
Cmpk2	4,79	2,79	3,98	0,0190	0,1378	Cmpk2				Sdc4
Cxcr3	3,54	1,55	3,98	3,27E-05	0,0032	Cxcr3				Add3
Apobec1	6,67	4,68	3,96	0,0002	0,0076	Apobec1				Pde3b
Miat	4,48	2,49	3,96	0,0120	0,1030	Miat				Inf2
C1qtnf1	2,33	0,35	3,95	0,0013	0,0260	C1qtnf1				Tmem144
Anxa2	2,95	0,97	3,95	0,0010	0,0225	Anxa2				Pirb
Maff	3,06	1,08	3,94	0,0152	0,1187	Maff				Sipa1l1
Arhgap6	2,46	0,49	3,92	0,0010	0,0226	Arhgap6				Ecscr
Gpnmb	2,07	0,1	3,92	0,0029	0,0431	Gpnmb				Marcks
Lgals3	3,17	1,21	3,91	0,0038	0,0510	Lgals3				Evi5
Fap	2,37	0,4	3,9	0,0001	0,0065	Fap				Narf
Zbtb16	2,56	0,6	3,9	0,0024	0,0381	Zbtb16				B130006D01Rik
Pcgf2	4,84	2,88	3,9	4,25E-05	0,0036	Pcgf2				Shmt1
Plxna1	5,49	3,53	3,9	0,0002	0,0100	Plxna1				Plin2
Fos	2,82	0,87	3,87	4,56E-06	0,0012	Fos				D17H6S56E-5
Cerkl	2,34	0,39	3,87	3,85E-05	0,0034	Cerkl				Cd63
Lyz1	2,19	0,24	3,86	0,0013	0,0265	Lyz1				Adgb
Atrnl1	3,93	1,98	3,85	0,0003	0,0105	Atrnl1				Pvt1
Ahnak	2,34	0,4	3,85	0,0029	0,0432	Ahnak				Hpgds
Dnase1l1	4,75	2,8	3,85	3,08E-05	0,0031	Dnase1l1				Vim
St8sia4	6,38	4,44	3,83	8,18E-05	0,0054	St8sia4				Plaur
Hoxb3	2,34	0,41	3,82	0,0004	0,0135	Hoxb3				Sall1
Phf11a	3,73	1,8	3,81	0,0099	0,0911	Phf11a				Man2a1
Lrrc16a	4,47	2,54	3,81	0,0008	0,0199	Lrrc16a				Slco2b1
Trerf1	3,11	1,19	3,8	9,84E-06	0,0018	Trerf1				Erf
Mob3b	2,61	0,68	3,8	0,0020	0,0343	Mob3b				Otud7b
Rasgrp1	3,34	1,41	3,8	0,0002	0,0099	Rasgrp1				Dlc1
Gm39888	2,03	0,1	3,79	0,0002	0,0087	Gm39888				S1pr1
Ifitm6	1,92	0	3,77	0,0194	0,1397	Ifitm6				Lmnb1
Tnip3	2,02	0,11	3,74	0,0003	0,0110	Tnip3				Sesn1
Nt5e	2,24	0,33	3,74	0,0028	0,0418	Nt5e				Tspan9
Oas1a	5,83	3,93	3,74	0,0012	0,0250	Oas1a				Pstpip2
Rsad2	2,87	0,97	3,72	0,0151	0,1181	Rsad2				S100a10
Mcemp1	2,28	0,4	3,7	1,84E-05	0,0024	Mcemp1				Fgr
Bcl3	5,27	3,39	3,68	0,0017	0,0317	Bcl3				Rasgrp3
Etv4	3,34	1,46	3,67	0,0005	0,0144	Etv4				Shb
B3gnt8	5,7	3,82	3,67	0,0002	0,0079	B3gnt8				Cybb
H2-Q5	7,19	5,32	3,65	0,0020	0,0343	H2-Q5				Csf2ra
Stard13	1,87	0	3,65	0,0001	0,0062	Stard13				Akirin2
Trpv4	5,78	3,93	3,6	0,0010	0,0220	Trpv4				Dnajc28
Bend4	2,13	0,29	3,6	5,63E-05	0,0043	Bend4				Large
Rnf43	1,96	0,11	3,59	5,14E-05	0,0042	Rnf43				St8sia6
Tk1	3,47	1,63	3,58	0,0067	0,0722	Tk1				Ccl9
Meg3	8,18	6,34	3,58	0,0228	0,1546	Meg3				Slc15a3
Asgr2	3,84	2	3,56	0,0012	0,0250	Asgr2				Rsad2
Stxbp6	2,35	0,53	3,55	2,26E-05	0,0027	Stxbp6				Plcg1
Arl5c	6,61	4,78	3,55	0,0020	0,0336	Arl5c				H2-D1
Shtn1	3,29	1,46	3,54	0,0005	0,0143	Shtn1				Snx29
Irf7	6,47	4,65	3,53	0,0137	0,1113	Irf7				Prox1
Cd4	1,93	0,12	3,51	0,0004	0,0126	Cd4				Gmpr
Tle1	4,57	2,76	3,49	7,48E-05	0,0051	Tle1				Bhlhb9
Fcho1	3,96	2,17	3,48	0,0005	0,0145	Fcho1				Hip1
Galc	6,88	5,08	3,47	5,35E-06	0,0013	Galc				Pfn1
Lrp8	3,21	1,42	3,47	0,0061	0,0682	Lrp8				Tnf
Fbxw17	3,88	2,08	3,47	0,0034	0,0471	Fbxw17				Zfp69
Aifm3	3,28	1,49	3,46	0,0260	0,1675	Aifm3				Pld1
Pfkp	3,83	2,04	3,45	5,55E-05	0,0043	Pfkp				Nr3c2
Plekhg1	2,1	0,31	3,45	0,0116	0,1009	Plekhg1				Spp1
Chp2	1,96	0,18	3,44	0,0003	0,0115	Chp2				Slamf6
Cpne6	2,3	0,53	3,43	0,0071	0,0747	Cpne6				Rnf149
Frmd6	2,9	1,13	3,42	0,0008	0,0205	Frmd6				Frmd6
Mx1	5,03	3,26	3,42	0,0188	0,1363	Mx1				Lamb2
4833411C07Rik	6	4,24	3,4	0,0007	0,0185	4833411C07Rik				Ehd1
Gpr176	1,96	0,2	3,4	0,0001	0,0069	Gpr176				Eif4ebp1
Mmp25	2,72	0,96	3,39	0,0038	0,0511	Mmp25				Klk8
Tm4sf5	1,97	0,21	3,38	0,0003	0,0105	Tm4sf5				Lrrc39
Milr1	7,3	5,54	3,38	7,71E-06	0,0016	Milr1				Plcl2
Lmna	4,79	3,04	3,36	7,00E-05	0,0049	Lmna				Clstn1
H2-K1	11,41	9,66	3,36	0,0012	0,0251	H2-K1				Cox6a2
Gapt	1,74	0	3,35	3,54E-05	0,0033	Gapt				9930021J03Rik
Creg2	3,09	1,35	3,34	6,24E-06	0,0014	Creg2				Ctsc
Anln	3,4	1,66	3,34	0,0017	0,0312	Anln				Cib1
Phlda3	2,34	0,6	3,33	0,0023	0,0376	Phlda3				Slc38a9
Olfr98	1,83	0,1	3,32	0,0064	0,0701	Olfr98				Ms4a6b
Tespa1	1,73	0	3,32	0,0003	0,0117	Tespa1				Bcl3
Nceh1	6,62	4,89	3,31	2,21E-06	0,0009	Nceh1				Ddit4
Dse	6,59	4,87	3,31	3,34E-05	0,0032	Dse				Ifi27l2a
Rxrg	3,71	1,98	3,31	0,0009	0,0205	Rxrg				Tppp
Ccl8	1,72	0	3,3	0,0030	0,0439	Ccl8				Psen2
Anxa5	7,16	5,45	3,28	1,66E-05	0,0023	Anxa5				Slc7a1
Plekhg3	2,24	0,53	3,27	0,0019	0,0330	Plekhg3				Mpeg1
Gm35522	4,15	2,44	3,26	0,0062	0,0691	Gm35522				Sparc
Tjp3	2,52	0,81	3,26	0,0016	0,0303	Tjp3				Ptprc
Il1rn	2,18	0,48	3,26	0,0006	0,0162	Il1rn				Apoe
Lpcat4	3,61	1,91	3,25	0,0006	0,0168	Lpcat4				Cdk5r1
Trim59	2,96	1,26	3,25	0,0036	0,0498	Trim59				Snx10
Car13	2,39	0,69	3,24	0,0004	0,0131	Car13				Alpk1
Celf3	3,84	2,15	3,24	0,0055	0,0643	Celf3				Ifnar1
Crip1	3,82	2,13	3,23	0,0015	0,0287	Crip1				Ptprj
H2-Bl	3,67	1,98	3,23	0,0005	0,0144	H2-Bl				Prkce
Stbd1	4,69	3,01	3,22	0,0003	0,0115	Stbd1				Hnmt
Fcgr4	6,01	4,33	3,2	0,0019	0,0335	Fcgr4				Cd74
Cd52	9,3	7,63	3,19	2,36E-05	0,0028	Cd52				Igsf6
Zc2hc1a	3,16	1,49	3,19	1,31E-05	0,0021	Zc2hc1a				Bend5
Kcnt1	3,09	1,42	3,18	0,0246	0,1622	Kcnt1				Cask
Htra3	6,85	5,18	3,17	1,89E-05	0,0025	Htra3				Abcg3
Acvrl1	7,06	5,39	3,17	2,04E-06	0,0008	Acvrl1				Smim1
Nfxl1	7,73	6,07	3,17	2,98E-05	0,0030	Nfxl1				Csmd3
Slc41a2	1,94	0,27	3,17	0,0003	0,0110	Slc41a2				Slamf9
Capn1	6,4	4,74	3,15	0,0002	0,0078	Capn1				Fchsd2
Fam20c	3,09	1,43	3,15	0,0011	0,0242	Fam20c				Fam213a
Gabbr2	4,73	3,07	3,15	0,0056	0,0651	Gabbr2				Slc2a5
Mpp1	6,77	5,11	3,15	2,97E-05	0,0030	Mpp1				Gm6277
Sdc3	9,12	7,47	3,13	0,0001	0,0070	Sdc3				Cxxc5
Anxa1	1,85	0,2	3,13	0,0251	0,1642	Anxa1				Cmtm6
Car9	3,05	1,4	3,12	0,0007	0,0189	Car9				Fscn1
Apoc1	1,94	0,31	3,11	0,0001	0,0064	Apoc1				Nrg2
4930455G09Rik	1,84	0,2	3,11	7,44E-05	0,0051	4930455G09Rik				Pear1
Clec2d	8,45	6,82	3,11	7,07E-08	0,0003	Clec2d				Pdk1
Rgs11	2,94	1,3	3,11	0,0028	0,0425	Rgs11				Slc1a5
Cep170b	4,53	2,9	3,11	0,0014	0,0274	Cep170b				Fcgr2b
Myo10	3,11	1,47	3,11	0,0098	0,0908	Myo10				Tet1
Hsf4	1,95	0,31	3,1	0,0039	0,0518	Hsf4				Cdh23
Pigz	5,04	3,41	3,1	1,61E-06	0,0008	Pigz				Oasl2
Clec10a	1,98	0,35	3,09	0,0003	0,0117	Clec10a				Jdp2
Soat2	5,21	3,58	3,09	0,0014	0,0274	Soat2				Dgkz
Mapt	2,99	1,37	3,08	0,0069	0,0739	Mapt				Klhl3
Acod1	2,06	0,44	3,07	0,0070	0,0739	Acod1				Fam214a
H2-Q4	7,14	5,52	3,06	0,0007	0,0186	H2-Q4				Prune2
Arhgef3	4,64	3,03	3,06	0,0001	0,0071	Arhgef3				Tlr1
Pde10a	3,99	2,38	3,06	0,0004	0,0133	Pde10a				Cp
B4galnt4	3,78	2,17	3,05	0,0064	0,0701	B4galnt4				Tmem64
Pyhin1	5,14	3,54	3,05	0,0212	0,1470	Pyhin1				Ddx60
Eps8	3,77	2,16	3,04	0,0043	0,0549	Eps8				Trio
Eml2	3,79	2,18	3,04	2,37E-05	0,0028	Eml2				Rbbp9
Cyp4f16	5,2	3,6	3,04	3,28E-05	0,0032	Cyp4f16				Gprasp2
Ly9	4,97	3,37	3,03	0,0063	0,0698	Ly9				Pilra
S1pr2	5,31	3,71	3,03	7,38E-05	0,0051	S1pr2				Timp2
Bzrap1	3,6	2	3,03	0,0196	0,1403	Bzrap1				Plxna4
Arpp21	4,06	2,46	3,03	0,0196	0,1403	Arpp21				Sft2d2
Fgd1	1,89	0,3	3,02	0,0005	0,0147	Fgd1				Marcksl1
Ikbke	2,67	1,07	3,02	0,0294	0,1818	Ikbke				Vcam1
Ddo	1,59	0	3,02	0,0008	0,0196	Ddo				Smap2
Fam212b	2,62	1,03	3,01	5,60E-05	0,0043	Fam212b				Spryd7
Sema4a	4,07	2,48	3	0,0002	0,0081	Sema4a				Tmbim1
Sdc4	6,91	5,33	2,99	7,89E-07	0,0007	Sdc4				Tle3
Ubxn11	3,5	1,93	2,98	0,0002	0,0096	Ubxn11				Col27a1
H2-D1	10,92	9,34	2,98	0,0019	0,0329	H2-D1				Naaa
Tsku	1,57	0	2,98	0,0006	0,0169	Tsku				Mdfi
Slfn5	5,03	3,46	2,97	0,0318	0,1904	Slfn5				Zfp37
Nrbp2	4,75	3,18	2,96	0,0039	0,0515	Nrbp2				Abcb4
Slc14a1	4,92	3,36	2,96	0,0006	0,0162	Slc14a1				Msrb1
Cbr2	3,02	1,46	2,96	0,0019	0,0335	Cbr2				Zfp697
Ntng2	2,97	1,41	2,95	0,0083	0,0821	Ntng2				Zfp532
Krt80	2,07	0,52	2,94	0,0007	0,0189	Krt80				Cds1
Csf2ra	9,06	7,51	2,93	0,0002	0,0082	Csf2ra				Iqgap1
Alpk1	5,13	3,58	2,93	0,0002	0,0095	Alpk1				Cd44
Mmp14	7,69	6,14	2,93	2,47E-07	0,0005	Mmp14				B4galt4
Xylt2	7,02	5,47	2,92	3,93E-05	0,0035	Xylt2				Prkca
Kcnq2	3,78	2,23	2,92	0,0114	0,0995	Kcnq2				Mgll
Spats2l	1,82	0,28	2,92	0,0002	0,0091	Spats2l				Rgs10
Cdca7l	3	1,45	2,92	0,0036	0,0497	Cdca7l				Usp18
1700003E16Rik	2,61	1,06	2,92	0,0067	0,0721	1700003E16Rik				Emb
Plk3	6,87	5,32	2,91	0,0021	0,0348	Plk3				Col6a3
Gm30189	3,4	1,85	2,91	0,0011	0,0243	Gm30189				Bckdha
Aph1c	3,65	2,12	2,9	0,0058	0,0667	Aph1c				Gabbr1
Lilra5	6,97	5,43	2,9	0,0007	0,0180	Lilra5				Nadk
Ctsc	9,43	7,9	2,89	9,32E-05	0,0059	Ctsc				Mmp14
Cox6b2	3	1,47	2,89	2,15E-05	0,0026	Cox6b2				Arl5c
Kif27	2,3	0,77	2,89	0,0052	0,0622	Kif27				Trp53cor1
Igsf9	4,82	3,3	2,87	8,97E-05	0,0058	Igsf9				Ier3
Bambi-ps1	1,78	0,26	2,87	0,0004	0,0136	Bambi-ps1				Fam65b
Sp100	6,59	5,07	2,87	0,0008	0,0200	Sp100				Sema4b
Sh3bgrl	4,46	2,94	2,86	0,0024	0,0387	Sh3bgrl				Smad3
N4bp3	2,27	0,76	2,85	0,0020	0,0345	N4bp3				Lpl
Glipr1	6,03	4,52	2,85	2,12E-05	0,0026	Glipr1				Serpine2
AF529169	2,73	1,23	2,84	0,0002	0,0089	AF529169				Foxn2
Lrrk2	1,61	0,1	2,84	0,0013	0,0265	Lrrk2				Lgals3bp
Fbn2	1,5	0	2,84	3,09E-05	0,0031	Fbn2				Tank
Hdac7	3,71	2,21	2,83	9,45E-05	0,0059	Hdac7				Ifit2
Dlgap2	2,8	1,3	2,82	0,0273	0,1729	Dlgap2				Tmc7
Fut4	4,31	2,81	2,82	0,0007	0,0186	Fut4				Rbms1
Slc2a3	4,87	3,37	2,82	3,40E-05	0,0032	Slc2a3				Tspan13
Sgsh	7,24	5,75	2,81	3,28E-05	0,0032	Sgsh				Zfp652
Adgrb3	3,57	2,08	2,81	0,0297	0,1830	Adgrb3				Nampt
Aldh1b1	2,6	1,11	2,81	0,0006	0,0168	Aldh1b1				Myl2
Rab3d	4,41	2,92	2,8	0,0004	0,0138	Rab3d				Cxcl16
Nfkbiz	7,94	6,46	2,8	0,0004	0,0126	Nfkbiz				Satb1
Rarg	3,26	1,77	2,79	0,0016	0,0303	Rarg				Sap30
Fuom	4,26	2,78	2,79	0,0002	0,0092	Fuom				Fxyd5
Ldlr	6,14	4,66	2,79	0,0009	0,0215	Ldlr				Slc25a37
Slamf9	7,88	6,4	2,78	1,57E-06	0,0008	Slamf9				Thrsp
Gcm2	1,75	0,28	2,77	0,0001	0,0065	Gcm2				Oxct1
Gm6904	3,13	1,66	2,77	0,0014	0,0281	Gm6904				Anxa5
Dgkg	2,58	1,11	2,77	0,0093	0,0873	Dgkg				Tcp11l2
Prrg1	1,67	0,2	2,77	5,25E-05	0,0042	Prrg1				Efnb1
Chic1	3,28	1,81	2,77	0,0002	0,0082	Chic1				Tspan18
Fgr	4,74	3,28	2,76	0,0005	0,0152	Fgr				Sp100
2500002B13Rik	3,16	1,7	2,75	0,0036	0,0491	2500002B13Rik				Usp24
Dnase1l3	2,19	0,73	2,75	0,0032	0,0462	Dnase1l3				Milr1
Chrm3	3,12	1,67	2,74	0,0200	0,1417	Chrm3				Hspb3
Cpd	7,34	5,89	2,74	0,0003	0,0108	Cpd				Zfp827
Ptpn7	2,23	0,78	2,73	0,0024	0,0378	Ptpn7				Incenp
Sik1	3,48	2,03	2,73	0,0017	0,0316	Sik1				Irf7
Mfsd6	2,56	1,12	2,72	0,0148	0,1171	Mfsd6				Nr1d2
Egr1	5,44	3,99	2,72	0,0015	0,0294	Egr1				Cyp4f18
Slc38a6	8,08	6,64	2,71	3,49E-05	0,0033	Slc38a6				Lpin1
F830208F22Rik	3,13	1,69	2,71	0,0004	0,0128	F830208F22Rik				Arhgap5
Tnfsf13b	7,91	6,47	2,71	0,0003	0,0124	Tnfsf13b				Pecam1
Foxred2	1,96	0,53	2,7	0,0009	0,0206	Foxred2				Slc46a3
Csrp1	4,37	2,94	2,69	1,10E-06	0,0008	Csrp1				Sppl3
Dnm1	5,38	3,95	2,69	0,0255	0,1658	Dnm1				Zbtb18
Gpr162	5,42	4	2,68	0,0003	0,0115	Gpr162				2700081O15Rik
Pstpip2	3,1	1,69	2,67	0,0042	0,0544	Pstpip2				Slc25a45
Stk39	2,47	1,06	2,66	0,0051	0,0608	Stk39				Mib2
Osbpl10	2,67	1,26	2,65	0,0133	0,1094	Osbpl10				2310001H17Rik
Ak8	1,51	0,1	2,65	0,0001	0,0073	Ak8				Pmepa1
Nfib	2,34	0,94	2,65	0,0092	0,0866	Nfib				Nfkbiz
Htatip2	4,07	2,66	2,64	0,0009	0,0208	Htatip2				Aldh2
Sqle	3,4	2	2,64	0,0011	0,0244	Sqle				Maged2
F630111L10Rik	1,76	0,36	2,63	4,11E-05	0,0036	F630111L10Rik				2010111I01Rik
Fam189a2	1,49	0,1	2,62	1,02E-05	0,0018	Fam189a2				Tln2
Gria1	3,7	2,31	2,62	0,0261	0,1682	Gria1				Acvr2b
Aqp9	1,39	0	2,62	0,0001	0,0070	Aqp9
Haus8	5,43	4,05	2,62	0,0001	0,0071	Haus8
Zdhhc23	1,71	0,33	2,62	0,0090	0,0853	Zdhhc23
Rab36	3,09	1,71	2,61	0,0039	0,0513	Rab36
Tnf	2,04	0,66	2,61	0,0130	0,1080	Tnf
Rnf217	1,75	0,37	2,61	0,0013	0,0267	Rnf217
Slc25a24	1,38	0	2,6	0,0004	0,0138	Slc25a24
Cntnap1	4,16	2,78	2,6	0,0086	0,0835	Cntnap1
Ccdc159	1,8	0,42	2,59	0,0110	0,0973	Ccdc159
Cdr2	2,84	1,47	2,59	0,0025	0,0393	Cdr2
Fas	2,36	0,99	2,59	0,0012	0,0257	Fas
Tnni3	4,63	3,26	2,59	7,82E-05	0,0053	Tnni3
Pgap1	3,75	2,38	2,59	0,0021	0,0350	Pgap1
P4ha2	2,3	0,93	2,58	0,0005	0,0156	P4ha2
Atp1a3	8,26	6,89	2,58	0,0006	0,0162	Atp1a3
Chd5	2,87	1,5	2,58	0,0333	0,1958	Chd5
Fgf14	2,1	0,74	2,58	0,0008	0,0192	Fgf14
Pim1	5,18	3,82	2,57	0,0142	0,1142	Pim1
Ngef	2,55	1,19	2,57	0,0237	0,1584	Ngef
E2f1	3,67	2,31	2,57	0,0008	0,0202	E2f1
Lpl	6,53	5,17	2,56	0,0002	0,0080	Lpl
Grm5	3,87	2,52	2,56	0,0088	0,0846	Grm5
Crym	1,55	0,2	2,56	0,0014	0,0280	Crym
Tmem178b	3,25	1,89	2,56	0,0221	0,1515	Tmem178b
Masp1	4,15	2,79	2,56	0,0007	0,0189	Masp1
Mgat5b	2,17	0,82	2,55	0,0115	0,1003	Mgat5b
Hist1h3d	5,16	3,82	2,55	0,0119	0,1026	Hist1h3d
Best1	2,86	1,51	2,54	8,86E-05	0,0057	Best1
H2-DMb2	6,02	4,67	2,54	0,0002	0,0098	H2-DMb2
Gria2	4,6	3,26	2,53	0,0336	0,1967	Gria2
Ptprt	2,8	1,46	2,52	0,0157	0,1215	Ptprt
Rnf150	6,52	5,19	2,51	0,0001	0,0067	Rnf150
Dennd2d	2,69	1,36	2,51	0,0008	0,0195	Dennd2d
Slc4a3	3,23	1,91	2,5	0,0010	0,0231	Slc4a3
Hacd4	6,76	5,44	2,5	0,0008	0,0196	Hacd4
Asns	2,37	1,05	2,5	0,0046	0,0581	Asns
Aldh2	7,57	6,25	2,5	2,31E-06	0,0009	Aldh2
Chst1	6,67	5,35	2,49	0,0012	0,0259	Chst1
Txndc16	7,27	5,95	2,49	0,0002	0,0082	Txndc16
Plau	8,37	7,06	2,49	0,0014	0,0277	Plau
Sptbn1	6,47	5,16	2,48	0,0002	0,0096	Sptbn1
Trim55	1,31	0	2,48	0,0004	0,0130	Trim55
AI662270	2,1	0,79	2,48	0,0014	0,0277	AI662270
Acsl3	3,69	2,39	2,47	7,41E-06	0,0016	Acsl3
Trpm2	6,74	5,44	2,47	0,0001	0,0071	Trpm2
Blvrb	5,62	4,32	2,47	1,98E-05	0,0026	Blvrb
Emp3	6,6	5,3	2,47	5,97E-05	0,0044	Emp3
Ccr2	3,31	2,01	2,47	0,0010	0,0232	Ccr2
Rtcb	8,9	7,6	2,46	4,39E-05	0,0037	Rtcb
Grin2a	4,06	2,77	2,46	0,0234	0,1573	Grin2a
Rab11fip4	3,49	2,2	2,45	0,0004	0,0125	Rab11fip4
Tmbim1	6,05	4,75	2,45	0,0002	0,0097	Tmbim1
Pgbd5	2,42	1,14	2,44	0,0243	0,1611	Pgbd5
Pqlc3	3,84	2,55	2,44	0,0041	0,0538	Pqlc3
Cyb5r1	6,68	5,4	2,44	0,0001	0,0071	Cyb5r1
Ralgds	4,71	3,43	2,43	0,0009	0,0217	Ralgds
Chpf	2,61	1,33	2,43	0,0041	0,0537	Chpf
Fbxl2	1,84	0,56	2,42	0,0048	0,0589	Fbxl2
Fam161a	3,44	2,17	2,41	0,0009	0,0217	Fam161a
Dgat2	2,13	0,86	2,41	0,0045	0,0571	Dgat2
Adap1	6,29	5,02	2,41	1,24E-05	0,0020	Adap1
Arpin	2,06	0,8	2,41	1,46E-05	0,0022	Arpin
St8sia1	4,44	3,18	2,41	0,0245	0,1616	St8sia1
Cntnap5a	2,03	0,76	2,4	0,0264	0,1692	Cntnap5a
Wwp1	6,46	5,19	2,4	0,0001	0,0070	Wwp1
Kcnk10	1,84	0,59	2,39	0,0009	0,0211	Kcnk10
Clec4b1	1,26	0	2,39	0,0018	0,0323	Clec4b1
Gm36284	1,63	0,37	2,39	0,0081	0,0809	Gm36284
Ptprn2	3,5	2,25	2,39	0,0011	0,0241	Ptprn2
Sigirr	1,82	0,56	2,39	0,0217	0,1492	Sigirr
Grm4	3,11	1,85	2,39	0,0178	0,1319	Grm4
Samd12	2,51	1,26	2,39	0,0187	0,1357	Samd12
Ppfibp1	4,35	3,09	2,38	0,0002	0,0094	Ppfibp1
Bcl2	4,02	2,76	2,38	0,0007	0,0179	Bcl2
P2ry2	2,44	1,19	2,38	5,32E-05	0,0042	P2ry2
Fam19a2	1,69	0,44	2,37	0,0011	0,0245	Fam19a2
Ntrk2	3,89	2,64	2,37	0,0050	0,0607	Ntrk2
Ccdc102a	5,3	4,05	2,37	0,0002	0,0096	Ccdc102a
Sstr4	2,39	1,15	2,37	0,0022	0,0361	Sstr4
Kctd17	4,1	2,86	2,36	7,46E-06	0,0016	Kctd17
Pvt1	5,75	4,51	2,36	0,0047	0,0588	Pvt1
Prr5l	5,99	4,75	2,36	0,0015	0,0291	Prr5l
Marveld1	4,42	3,18	2,36	0,0005	0,0156	Marveld1
Ppargc1a	1,35	0,11	2,36	0,0292	0,1811	Ppargc1a
Sh3rf3	1,61	0,37	2,36	0,0305	0,1855	Sh3rf3
Piwil2	1,65	0,41	2,36	0,0039	0,0515	Piwil2
Tenm4	2,68	1,44	2,36	0,0303	0,1849	Tenm4
Tmcc2	4,18	2,95	2,35	0,0023	0,0376	Tmcc2
Rap2b	3,08	1,85	2,34	0,0089	0,0849	Rap2b
Tmem261	5,8	4,57	2,34	0,0004	0,0134	Tmem261
Hivep2	3,5	2,27	2,34	0,0012	0,0251	Hivep2
Ulbp1	2,39	1,17	2,34	0,0012	0,0258	Ulbp1
Krt7	1,52	0,3	2,33	0,0129	0,1073	Krt7
Fam131b	2,42	1,2	2,33	0,0029	0,0430	Fam131b
Rnf213	6,05	4,83	2,33	0,0110	0,0972	Rnf213
St8sia6	4,43	3,21	2,33	0,0012	0,0258	St8sia6
Hoxb4	4,45	3,23	2,33	0,0025	0,0394	Hoxb4
Dok2	1,98	0,77	2,33	0,0064	0,0702	Dok2
Synpo	1,93	0,71	2,32	0,0006	0,0169	Synpo
Dnajb13	1,42	0,21	2,31	0,0007	0,0186	Dnajb13
Ms4a6b	7,03	5,82	2,31	1,75E-05	0,0024	Ms4a6b
Gcat	3,03	1,82	2,31	0,0102	0,0928	Gcat
Gla	4,44	3,24	2,3	0,0002	0,0087	Gla
Tmem176b	10,59	9,39	2,3	5,28E-05	0,0042	Tmem176b
Syt8	1,93	0,74	2,29	0,0019	0,0329	Syt8
H2-T-ps	1,88	0,68	2,29	0,0002	0,0078	H2-T-ps
Wdr54	1,98	0,78	2,29	0,0082	0,0814	Wdr54
Galnt3	5,35	4,15	2,29	0,0003	0,0117	Galnt3
Cd63	9,58	8,39	2,29	0,0001	0,0071	Cd63
Nfasc	3,78	2,59	2,28	0,0269	0,1714	Nfasc
F730043M19Rik	3,17	1,99	2,27	0,0030	0,0441	F730043M19Rik
6530402F18Rik	5,03	3,85	2,27	0,0012	0,0255	6530402F18Rik
Csmd1	1,86	0,68	2,27	0,0021	0,0346	Csmd1
Ablim2	3,66	2,48	2,27	0,0171	0,1289	Ablim2
Celsr3	2,2	1,02	2,26	0,0132	0,1091	Celsr3
Adgb	1,67	0,49	2,26	0,0120	0,1029	Adgb
Unc13a	2,91	1,73	2,26	0,0033	0,0470	Unc13a
Slfn3	3,28	2,1	2,26	0,0134	0,1100	Slfn3
Stard10	1,75	0,58	2,26	0,0044	0,0563	Stard10
Dgkb	2,39	1,21	2,25	0,0016	0,0305	Dgkb
Dpf1	2,23	1,06	2,25	0,0149	0,1173	Dpf1
Lmtk3	4,22	3,05	2,25	0,0239	0,1594	Lmtk3
Cox6a2	3,48	2,31	2,25	0,0027	0,0414	Cox6a2
Lingo2	1,33	0,16	2,25	0,0244	0,1613	Lingo2
Lrguk	4,11	2,94	2,25	0,0005	0,0151	Lrguk
Dnajb14	5,94	4,77	2,24	9,83E-05	0,0061	Dnajb14
Actr3b	1,98	0,82	2,24	0,0186	0,1356	Actr3b
Sorl1	6,88	5,72	2,24	0,0001	0,0069	Sorl1
Efr3b	2,77	1,61	2,23	0,0087	0,0842	Efr3b
Pqlc1	4,96	3,8	2,23	5,88E-06	0,0014	Pqlc1
Lancl2	3,05	1,89	2,23	0,0004	0,0131	Lancl2
Mir8120	1,35	0,19	2,23	0,0046	0,0580	Mir8120
Cenpe	2,02	0,87	2,23	0,0165	0,1262	Cenpe
Osgin1	5,31	4,16	2,22	0,0002	0,0078	Osgin1
Grin1	4,7	3,55	2,22	0,0009	0,0207	Grin1
Ifnar1	8,44	7,29	2,22	0,0004	0,0132	Ifnar1
Slfn2	7,1	5,94	2,22	0,0017	0,0316	Slfn2
Limd1	4,82	3,67	2,22	0,0001	0,0067	Limd1
Nrcam	2,97	1,82	2,22	0,0106	0,0951	Nrcam
Cadm2	2,93	1,78	2,22	0,0251	0,1642	Cadm2
Rtp4	7,33	6,18	2,22	0,0164	0,1254	Rtp4
A130077B15Rik	3,61	2,47	2,22	0,0075	0,0772	A130077B15Rik
Slc44a1	6,34	5,2	2,21	5,90E-05	0,0044	Slc44a1
Coro6	4,2	3,06	2,21	0,0045	0,0570	Coro6
Akr1c13	2,18	1,03	2,21	0,0065	0,0709	Akr1c13
Rcor2	1,83	0,69	2,21	0,0032	0,0456	Rcor2
Ppp3cc	3,67	2,53	2,21	0,0079	0,0800	Ppp3cc
D17H6S56E-5	7,38	6,24	2,2	0,0008	0,0195	D17H6S56E-5
Mvb12a	5,18	4,04	2,2	0,0002	0,0100	Mvb12a
Mocos	1,34	0,2	2,2	0,0025	0,0389	Mocos
Ntng1	2,35	1,21	2,2	0,0007	0,0190	Ntng1
Tmprss4	1,48	0,34	2,2	0,0106	0,0952	Tmprss4
LOC108168196	1,33	0,2	2,2	0,0049	0,0594	LOC108168196
Nyap2	2,86	1,73	2,2	0,0057	0,0662	Nyap2
Jdp2	5,46	4,32	2,2	0,0011	0,0241	Jdp2
Inf2	4,39	3,26	2,19	0,0249	0,1633	Inf2
Rasgrp2	1,58	0,44	2,19	0,0135	0,1103	Rasgrp2
Ahrr	3,43	2,3	2,19	0,0012	0,0250	Ahrr
Tm4sf19	1,24	0,11	2,19	0,0045	0,0571	Tm4sf19
F3	2,13	1	2,18	0,0157	0,1213	F3
Aifm2	2,04	0,92	2,18	0,0004	0,0129	Aifm2
LOC108167440	3,44	2,31	2,18	0,0110	0,0976	LOC108167440
Lrrc4b	1,97	0,85	2,18	0,0005	0,0150	Lrrc4b
Stx3	2,88	1,76	2,18	0,0007	0,0183	Stx3
Neurl1b	4,44	3,32	2,18	0,0025	0,0396	Neurl1b
Fsd2	1,12	0	2,18	0,0001	0,0071	Fsd2
Capn2	4,23	3,12	2,17	0,0002	0,0100	Capn2
Ier3	2,55	1,44	2,17	0,0038	0,0508	Ier3
Coro2b	2,21	1,09	2,17	0,0139	0,1128	Coro2b
Clstn3	4,19	3,07	2,16	0,0118	0,1020	Clstn3
Disp2	3,18	2,07	2,16	0,0059	0,0670	Disp2
Col20a1	2,24	1,13	2,15	0,0080	0,0803	Col20a1
Slc25a10	5,81	4,7	2,15	0,0012	0,0256	Slc25a10
Irs2	6,3	5,21	2,14	0,0024	0,0387	Irs2
H2-DMa	8	6,9	2,14	3,35E-05	0,0032	H2-DMa
Foxp4	5,38	4,29	2,14	7,47E-05	0,0051	Foxp4
6030443J06Rik	1,63	0,54	2,14	0,0069	0,0732	6030443J06Rik
Pard6g	1,2	0,11	2,13	0,0235	0,1578	Pard6g
Pparg	1,09	0	2,13	0,0038	0,0507	Pparg
Dpp7	6,25	5,16	2,13	0,0008	0,0202	Dpp7
H2-K2	3,97	2,88	2,13	0,0005	0,0144	H2-K2
Sptbn4	1,69	0,6	2,12	0,0123	0,1046	Sptbn4
Tbc1d8	7,76	6,67	2,12	0,0002	0,0092	Tbc1d8
Prkar1b	6,5	5,41	2,12	0,0001	0,0063	Prkar1b
Plin3	5,94	4,85	2,12	0,0001	0,0074	Plin3
C3ar1	9,33	8,25	2,12	5,70E-05	0,0043	C3ar1
Cd5l	2,13	1,05	2,12	0,0057	0,0662	Cd5l
Cd83	5,43	4,35	2,12	0,0048	0,0589	Cd83
Gpr183	7,18	6,1	2,11	1,76E-06	0,0008	Gpr183
Lrtm2	2,21	1,13	2,11	0,0021	0,0349	Lrtm2
Cep128	3,7	2,62	2,11	0,0029	0,0432	Cep128
Agbl4	1,54	0,47	2,1	0,0162	0,1242	Agbl4
Il18bp	3,6	2,53	2,1	0,0003	0,0105	Il18bp
Sptbn2	2,84	1,77	2,1	0,0120	0,1031	Sptbn2
Cysltr2	1,07	0	2,09	0,0006	0,0169	Cysltr2
LOC105246186	1,07	0	2,09	0,0042	0,0539	LOC105246186
Sez6l	4	2,93	2,09	0,0002	0,0086	Sez6l
Cfp	2,99	1,93	2,09	0,0002	0,0089	Cfp
Gramd1b	6,25	5,18	2,09	0,0004	0,0131	Gramd1b
Tpst1	5,59	4,52	2,09	0,0001	0,0075	Tpst1
Tmeff1	1,77	0,7	2,09	0,0284	0,1777	Tmeff1
Zfp704	5,32	4,26	2,09	0,0057	0,0659	Zfp704
Diaph1	7,37	6,31	2,09	0,0026	0,0402	Diaph1
Ptger2	1,17	0,11	2,09	0,0023	0,0366	Ptger2
Brsk2	1,26	0,2	2,09	0,0210	0,1455	Brsk2
Ppargc1b	3,21	2,15	2,09	0,0155	0,1204	Ppargc1b
Ctla2a	1,3	0,24	2,08	0,0133	0,1093	Ctla2a
Plin2	7,36	6,3	2,08	0,0004	0,0137	Plin2
Lrfn4	1,66	0,6	2,08	0,0010	0,0231	Lrfn4
Mpzl3	1,57	0,51	2,08	0,0005	0,0154	Mpzl3
Gm34483	1,17	0,11	2,08	0,0028	0,0419	Gm34483
Fras1	1,72	0,67	2,08	0,0053	0,0632	Fras1
Lgals3bp	10,17	9,11	2,08	0,0062	0,0691	Lgals3bp
Cabyr	2,04	0,99	2,08	0,0253	0,1650	Cabyr
Fam213a	3,46	2,41	2,08	0,0144	0,1148	Fam213a
Gm35113	1,5	0,45	2,08	0,0176	0,1310	Gm35113
Slc22a18	1,67	0,62	2,08	0,0021	0,0346	Slc22a18
St7	4,63	3,57	2,08	0,0037	0,0507	St7
Gstm1	4,07	3,02	2,08	0,0003	0,0118	Gstm1
Ppp1r1a	1,27	0,22	2,07	0,0035	0,0483	Ppp1r1a
Rec8	1,35	0,3	2,07	0,0001	0,0070	Rec8
Rbbp8	4,09	3,04	2,07	0,0019	0,0330	Rbbp8
Coro7	7,49	6,44	2,07	1,18E-06	0,0008	Coro7
Sap30	4,41	3,36	2,07	1,39E-06	0,0008	Sap30
Nme4	3,2	2,16	2,07	0,0003	0,0108	Nme4
Otub2	3,7	2,65	2,07	0,0079	0,0798	Otub2
Gpd2	3,51	2,46	2,06	0,0004	0,0125	Gpd2
Cercam	4,04	3	2,06	0,0043	0,0547	Cercam
Fpr1	1,04	0	2,06	5,32E-05	0,0042	Fpr1
Cxcl2	1,04	0	2,06	0,0036	0,0498	Cxcl2
Lrfn5	2,25	1,21	2,06	0,0318	0,1905	Lrfn5
Gm12250	6,37	5,33	2,05	0,0048	0,0591	Gm12250
Dbn1	2,79	1,76	2,05	0,0223	0,1521	Dbn1
Flt1	2,03	0,99	2,05	0,0020	0,0343	Flt1
H2-M3	6,33	5,3	2,05	0,0173	0,1297	H2-M3
Rhof	3,03	1,99	2,05	0,0086	0,0835	Rhof
Syt1	3,56	2,52	2,05	0,0236	0,1578	Syt1
Hoxb7	1,03	0	2,05	2,41E-05	0,0028	Hoxb7
Scn3b	1,76	0,73	2,05	0,0015	0,0287	Scn3b
Exoc3l4	2,42	1,39	2,05	0,0233	0,1565	Exoc3l4
Astn2	2,6	1,57	2,04	0,0149	0,1173	Astn2
LOC108167568	1,82	0,79	2,04	0,0148	0,1169	LOC108167568
Cdk18	2,28	1,25	2,04	0,0160	0,1232	Cdk18
Akap6	3,06	2,04	2,04	0,0310	0,1876	Akap6
Gnptab	6,82	5,8	2,03	0,0008	0,0196	Gnptab
Gm33046	1,22	0,2	2,03	0,0009	0,0217	Gm33046
Col6a1	2,63	1,61	2,03	0,0227	0,1540	Col6a1
C2	1,67	0,65	2,03	0,0068	0,0726	C2
Nrp1	7,67	6,65	2,02	0,0026	0,0402	Nrp1
Slc35e4	3,88	2,86	2,02	0,0013	0,0264	Slc35e4
Wscd2	2,92	1,9	2,02	0,0035	0,0483	Wscd2
Cd300lb	2,3	1,29	2,02	0,0025	0,0390	Cd300lb
Dna2	2,92	1,91	2,02	0,0016	0,0303	Dna2
Mdk	2,45	1,44	2,02	0,0134	0,1099	Mdk
Hapln2	1,96	0,95	2,02	0,0091	0,0860	Hapln2
Otud7a	2,09	1,07	2,02	0,0011	0,0240	Otud7a
LOC108167784	1,48	0,47	2,02	0,0034	0,0472	LOC108167784
Vegfa	3,14	2,13	2,02	0,0307	0,1862	Vegfa
Gdap10	5,42	4,41	2,01	0,0053	0,0627	Gdap10
Wdr31	2	0,99	2,01	0,0072	0,0754	Wdr31
Grik2	3,31	2,3	2,01	0,0230	0,1550	Grik2
Haao	5,94	4,94	2	0,0011	0,0238	Haao
Zfp810	5,19	4,19	2	0,0057	0,0662	Zfp810
Nr2f1	1,48	0,48	2	0,0244	0,1613	Nr2f1
Srxn1	2,39	1,39	2	0,0047	0,0583	Srxn1
Gucy1a3	1,12	0,12	2	0,0003	0,0112	Gucy1a3
Slc4a10	1,64	0,64	2	0,0335	0,1963	Slc4a10
Nphp4	1,57	0,57	2	0,0186	0,1356	Nphp4
Pilra	6,5	5,51	2	0,0003	0,0105	Pilra
Plxna2	1,97	0,97	2	0,0153	0,1195	Plxna2
Rasgrf1	3,02	2,03	2	0,0005	0,0144	Rasgrf1
Cckbr	1,88	0,88	1,99	0,0240	0,1598	Cckbr
Irak3	4,46	3,46	1,99	0,0025	0,0388	Irak3
Gm14379	1,11	0,11	1,99	0,0013	0,0272	Gm14379
Hdac9	6,12	5,14	1,98	0,0001	0,0067	Hdac9
Enpp4	6,26	5,28	1,98	0,0038	0,0510	Enpp4
Lmtk2	2,76	1,78	1,98	0,0080	0,0801	Lmtk2
Igfbp4	6,58	5,59	1,97	0,0003	0,0106	Igfbp4
Ccdc120	1,53	0,56	1,97	0,0102	0,0928	Ccdc120
Tnfrsf11a	9	8,02	1,97	0,0001	0,0069	Tnfrsf11a
Foxn2	5,2	4,23	1,97	0,0011	0,0240	Foxn2
Kcnb1	2,69	1,72	1,96	0,0259	0,1672	Kcnb1
Kcna1	2,3	1,33	1,96	0,0171	0,1286	Kcna1
Il10	0,97	0	1,96	0,0026	0,0405	Il10
Cd163	2,26	1,29	1,96	0,0117	0,1015	Cd163
Atp10a	2,43	1,47	1,96	0,0129	0,1071	Atp10a
Syt6	2,93	1,96	1,96	0,0052	0,0620	Syt6
Cnksr2	2,36	1,4	1,95	0,0040	0,0528	Cnksr2
Icosl	8,06	7,09	1,95	0,0008	0,0191	Icosl
Bcl6	6,2	5,23	1,95	0,0013	0,0268	Bcl6
Hmox1	6,4	5,43	1,95	0,0001	0,0070	Hmox1
Slit2	1,08	0,12	1,95	0,0261	0,1683	Slit2
Mapkapk3	6,24	5,28	1,95	0,0009	0,0206	Mapkapk3
Incenp	5,44	4,47	1,95	0,0007	0,0176	Incenp
Lrp6	7,41	6,45	1,95	0,0016	0,0303	Lrp6
Gm26947	3,09	2,13	1,94	0,0074	0,0765	Gm26947
Vgf	2,91	1,96	1,94	0,0013	0,0270	Vgf
Prune2	2,05	1,09	1,94	0,0167	0,1267	Prune2
Fblim1	7,6	6,65	1,94	0,0002	0,0096	Fblim1
P2rx4	6,36	5,4	1,94	0,0003	0,0105	P2rx4
Athl1	4,65	3,69	1,94	0,0043	0,0549	Athl1
Cd274	5,27	4,31	1,94	2,59E-06	0,0009	Cd274
Lncpint	3,35	2,39	1,94	0,0063	0,0701	Lncpint
Fam234a	6,09	5,13	1,94	0,0019	0,0334	Fam234a
Rapgef3	1,78	0,82	1,94	0,0047	0,0586	Rapgef3
Spred3	3,23	2,28	1,93	0,0134	0,1098	Spred3
Tbc1d12	5,23	4,28	1,93	0,0015	0,0295	Tbc1d12
Tnip1	7,1	6,15	1,93	0,0015	0,0287	Tnip1
Stat2	6,84	5,9	1,93	0,0001	0,0065	Stat2
Spef2	1,58	0,64	1,93	0,0109	0,0966	Spef2
Nlgn1	1,69	0,75	1,93	0,0038	0,0512	Nlgn1
0610038B21Rik	1,31	0,37	1,92	0,0003	0,0121	0610038B21Rik
Pgap3	3,79	2,85	1,92	0,0013	0,0259	Pgap3
Adcy1	4,75	3,81	1,92	0,0114	0,1001	Adcy1
Gm15743	1,36	0,42	1,92	0,0257	0,1664	Gm15743
E2f2	2,62	1,68	1,92	0,0011	0,0242	E2f2
Igsf6	5,94	5,01	1,92	0,0150	0,1181	Igsf6
Ddx60	4,12	3,18	1,92	0,0077	0,0782	Ddx60
Eif4ebp1	5,04	4,11	1,91	0,0029	0,0430	Eif4ebp1
Asap2	1,61	0,67	1,91	0,0082	0,0816	Asap2
S100a1	2,59	1,65	1,91	0,0069	0,0738	S100a1
Ncam1	4,05	3,11	1,91	0,0304	0,1852	Ncam1
Rassf3	5,29	4,36	1,91	0,0042	0,0542	Rassf3
Synj2	7,04	6,11	1,91	0,0021	0,0350	Synj2
Npr2	2,33	1,39	1,91	0,0047	0,0586	Npr2
Slc26a10	1,61	0,67	1,91	0,0047	0,0584	Slc26a10
Hoxb6	0,93	0	1,91	6,33E-05	0,0046	Hoxb6
Smim24	4,81	3,88	1,91	0,0004	0,0139	Smim24
Akap3	0,93	0	1,91	0,0103	0,0936	Akap3
Slamf8	7,13	6,2	1,91	0,0090	0,0859	Slamf8
Lbh	5,86	4,93	1,91	0,0010	0,0225	Lbh
Ptrh1	1,37	0,44	1,91	0,0177	0,1316	Ptrh1
Adgrb2	3,79	2,85	1,91	0,0055	0,0648	Adgrb2
Pmepa1	7,63	6,7	1,91	0,0006	0,0162	Pmepa1
Alk	1,27	0,34	1,9	0,0243	0,1608	Alk
Atad2	3,3	2,37	1,9	0,0026	0,0402	Atad2
LOC108168817	2,26	1,33	1,9	0,0018	0,0328	LOC108168817
Stab1	10,87	9,94	1,9	0,0011	0,0240	Stab1
Marcksl1	3,19	2,27	1,9	0,0030	0,0437	Marcksl1
Tmem231	3,03	2,1	1,9	0,0016	0,0298	Tmem231
Nfe2	1,18	0,25	1,9	0,0133	0,1094	Nfe2
Bcl2l14	1,27	0,35	1,9	3,09E-05	0,0031	Bcl2l14
2900005J15Rik	3,86	2,94	1,89	0,0010	0,0233	2900005J15Rik
Nadk	8,92	8	1,89	0,0001	0,0065	Nadk
Parp11	6,23	5,31	1,89	0,0159	0,1226	Parp11
Iqcg	1,5	0,59	1,89	0,0071	0,0750	Iqcg
Slc15a3	8,5	7,59	1,89	0,0038	0,0508	Slc15a3
Cacfd1	4,89	3,98	1,89	0,0004	0,0140	Cacfd1
Mbnl2	4,11	3,19	1,89	0,0158	0,1221	Mbnl2
Abcc8	1,29	0,38	1,89	0,0010	0,0229	Abcc8
Crlf2	7,07	6,16	1,88	0,0060	0,0678	Crlf2
Dusp1	3,19	2,27	1,88	0,0007	0,0185	Dusp1
B4galnt1	7,69	6,78	1,88	1,67E-05	0,0023	B4galnt1
Tmem246	1,28	0,37	1,88	0,0323	0,1925	Tmem246
Olfr99	3,82	2,91	1,88	0,0172	0,1290	Olfr99
Atp8b4	0,91	0	1,88	0,0089	0,0853	Atp8b4
Fbxl21	2,93	2,02	1,88	0,0147	0,1168	Fbxl21
Stard4	2,49	1,58	1,88	0,0137	0,1116	Stard4
Shank3	2,01	1,1	1,88	0,0248	0,1633	Shank3
Tlr11	2,03	1,12	1,87	0,0067	0,0721	Tlr11
Cdc14b	4,52	3,61	1,87	0,0073	0,0761	Cdc14b
Cecr6	1,36	0,45	1,87	0,0002	0,0094	Cecr6
Atp2a1	1,02	0,11	1,87	0,0007	0,0180	Atp2a1
4930486L24Rik	3,07	2,16	1,87	0,0004	0,0136	4930486L24Rik
Ank	8,12	7,22	1,87	0,0002	0,0094	Ank
Atp9a	3,47	2,57	1,87	0,0082	0,0811	Atp9a
Tnfaip2	6,61	5,71	1,87	0,0021	0,0354	Tnfaip2
Sgsm1	1,71	0,81	1,87	0,0177	0,1318	Sgsm1
Fam135b	1,63	0,72	1,87	0,0050	0,0604	Fam135b
Cldn1	1,45	0,55	1,87	0,0007	0,0189	Cldn1
Tfec	2,51	1,61	1,87	0,0015	0,0289	Tfec
Rims2	1,69	0,79	1,87	0,0130	0,1081	Rims2
Mgl2	1,04	0,14	1,87	0,0243	0,1610	Mgl2
P4htm	2,94	2,04	1,87	0,0188	0,1363	P4htm
Tspan32	5,79	4,89	1,87	0,0018	0,0319	Tspan32
Tub	1,97	1,07	1,87	0,0012	0,0255	Tub
Hspa4l	3,02	2,12	1,87	0,0114	0,0997	Hspa4l
Znrf3	5,45	4,55	1,86	0,0020	0,0345	Znrf3
Gm1070	2,55	1,65	1,86	0,0255	0,1657	Gm1070
Atf5	2,26	1,36	1,86	0,0094	0,0883	Atf5
Tlr1	7,48	6,58	1,86	0,0012	0,0250	Tlr1
Olfm2	1,92	1,03	1,86	0,0168	0,1273	Olfm2
Hlx	2,81	1,91	1,86	0,0217	0,1492	Hlx
Rab11fip1	0,89	0	1,86	0,0003	0,0105	Rab11fip1
Tmem154	2,11	1,22	1,86	0,0229	0,1547	Tmem154
Kbtbd6	2,37	1,48	1,86	0,0311	0,1878	Kbtbd6
Ptprn	4,07	3,17	1,86	0,0304	0,1852	Ptprn
5430437J10Rik	0,89	0	1,86	0,0004	0,0125	5430437J10Rik
Ahnak2	1,32	0,43	1,86	0,0012	0,0250	Ahnak2
Svop	1,91	1,02	1,86	0,0020	0,0343	Svop
AA467197	0,89	0	1,85	0,0199	0,1411	AA467197
Il10rb	10,91	10,03	1,85	0,0001	0,0071	Il10rb
Pigs	7,88	7	1,84	0,0003	0,0111	Pigs
2010111I01Rik	4,58	3,7	1,84	0,0097	0,0899	2010111I01Rik
Chrna4	1,68	0,8	1,84	0,0020	0,0343	Chrna4
Ptpru	2,24	1,36	1,84	0,0004	0,0125	Ptpru
Gm34780	0,88	0	1,84	0,0003	0,0124	Gm34780
LOC108168394	1,43	0,55	1,84	0,0084	0,0825	LOC108168394
B430306N03Rik	6,18	5,3	1,84	0,0115	0,1005	B430306N03Rik
Ets2	3,87	3	1,83	0,0009	0,0211	Ets2
Ccrl2	5,56	4,68	1,83	0,0242	0,1603	Ccrl2
Rftn2	1,8	0,93	1,83	0,0008	0,0191	Rftn2
Rassf7	1,93	1,06	1,83	0,0157	0,1215	Rassf7
Ipw	2,14	1,27	1,83	0,0317	0,1903	Ipw
Fam129a	6,76	5,89	1,83	0,0078	0,0789	Fam129a
Cd22	6,78	5,91	1,83	0,0004	0,0137	Cd22
Ptpn5	2,52	1,66	1,83	0,0012	0,0253	Ptpn5
Srcin1	3,02	2,15	1,83	0,0173	0,1295	Srcin1
Mt3	3,46	2,59	1,83	0,0124	0,1049	Mt3
Slc4a8	2	1,13	1,82	0,0072	0,0757	Slc4a8
Relb	1,66	0,8	1,82	0,0040	0,0521	Relb
Tubb6	5,64	4,77	1,82	0,0003	0,0110	Tubb6
Kirrel3	1,9	1,04	1,82	0,0057	0,0661	Kirrel3
Atp2b4	2,72	1,86	1,82	0,0319	0,1907	Atp2b4
Ndst3	1,47	0,6	1,82	0,0053	0,0628	Ndst3
Nrros	4,97	4,11	1,82	0,0029	0,0426	Nrros
Spock2	3,97	3,11	1,82	0,0108	0,0959	Spock2
Slc17a7	4,44	3,58	1,82	0,0155	0,1204	Slc17a7
Edil3	2,13	1,27	1,82	0,0284	0,1776	Edil3
Ncapg2	2,29	1,43	1,81	0,0065	0,0709	Ncapg2
Cyth1	6,53	5,67	1,81	0,0030	0,0438	Cyth1
Diaph3	1,54	0,68	1,81	0,0054	0,0640	Diaph3
Wwtr1	2,27	1,41	1,81	0,0059	0,0670	Wwtr1
Slc7a1	5,58	4,73	1,81	0,0185	0,1350	Slc7a1
Mybl1	2,61	1,75	1,81	0,0256	0,1658	Mybl1
Gm12216	4,71	3,86	1,81	0,0246	0,1622	Gm12216
Klhl34	2,75	1,89	1,81	0,0340	0,1983	Klhl34
1110008P14Rik	2,22	1,37	1,81	0,0037	0,0498	1110008P14Rik
Dck	4,56	3,71	1,8	0,0034	0,0480	Dck
Tmem52	6,47	5,62	1,8	0,0003	0,0105	Tmem52
Chl1	3,26	2,41	1,8	0,0053	0,0630	Chl1
Smc4	3,68	2,83	1,8	0,0045	0,0571	Smc4
Prrt1	3,51	2,66	1,8	0,0168	0,1276	Prrt1
Smpdl3a	6,02	5,17	1,8	0,0003	0,0110	Smpdl3a
1700113A16Rik	2,9	2,05	1,8	0,0086	0,0833	1700113A16Rik
A330023F24Rik	3,34	2,49	1,8	0,0033	0,0467	A330023F24Rik
Eps15	7,33	6,49	1,8	0,0003	0,0121	Eps15
Rell2	3,45	2,61	1,8	0,0329	0,1946	Rell2
Adamts20	0,96	0,11	1,8	0,0167	0,1267	Adamts20
Atp2b2	5,33	4,48	1,8	0,0160	0,1229	Atp2b2
2610507B11Rik	8,3	7,45	1,8	0,0007	0,0188	2610507B11Rik
Rasgef1b	6,33	5,48	1,8	4,78E-06	0,0012	Rasgef1b
Gm32026	2,63	1,79	1,8	0,0199	0,1413	Gm32026
Acot9	5,81	4,96	1,8	0,0036	0,0497	Acot9
Pfkfb1	2,46	1,62	1,79	0,0202	0,1425	Pfkfb1
Ace	1,03	0,18	1,79	0,0221	0,1515	Ace
Ypel4	0,94	0,1	1,79	0,0069	0,0733	Ypel4
Atp6v1g2	3,33	2,48	1,79	0,0150	0,1178	Atp6v1g2
Crtap	6,94	6,1	1,79	9,35E-05	0,0059	Crtap
Ankrd28	4,08	3,24	1,79	0,0317	0,1900	Ankrd28
Pde8a	2,51	1,67	1,79	0,0008	0,0194	Pde8a
Gm20324	1,96	1,12	1,79	0,0039	0,0515	Gm20324
Tank	6,12	5,29	1,79	0,0050	0,0601	Tank
Lsamp	3,02	2,19	1,79	0,0041	0,0534	Lsamp
Tgfb3	1,37	0,54	1,79	0,0262	0,1683	Tgfb3
Hectd2	3,35	2,52	1,78	0,0003	0,0124	Hectd2
Dhx58	6,23	5,4	1,78	0,0038	0,0509	Dhx58
Pea15a	8,37	7,54	1,78	2,86E-05	0,0030	Pea15a
Slc6a9	4	3,17	1,78	0,0041	0,0538	Slc6a9
Cntn1	3,12	2,29	1,78	0,0086	0,0837	Cntn1
4931428F04Rik	2,04	1,21	1,78	0,0059	0,0670	4931428F04Rik
Sema6b	5,25	4,42	1,78	0,0002	0,0080	Sema6b
Pnkd	2,94	2,11	1,78	0,0052	0,0619	Pnkd
Col4a1	1,44	0,61	1,78	0,0022	0,0361	Col4a1
Gad1	2,25	1,42	1,78	0,0056	0,0653	Gad1
Gm5122	0,93	0,1	1,78	0,0120	0,1031	Gm5122
Ms4a4b	0,94	0,11	1,78	0,0036	0,0498	Ms4a4b
Wtip	4,98	4,15	1,78	0,0010	0,0228	Wtip
Sv2b	2,23	1,4	1,78	0,0175	0,1309	Sv2b
Ccdc69	1,73	0,9	1,78	0,0005	0,0144	Ccdc69
Nr1h3	1,9	1,07	1,78	0,0077	0,0781	Nr1h3
Dock5	1,04	0,21	1,77	0,0014	0,0273	Dock5
Smco4	2,52	1,69	1,77	0,0045	0,0572	Smco4
Pcsk2	3,15	2,32	1,77	0,0148	0,1169	Pcsk2
Gramd3	2,91	2,08	1,77	0,0059	0,0672	Gramd3
Dok4	1,9	1,07	1,77	0,0300	0,1839	Dok4
Erc1	3,32	2,49	1,77	0,0214	0,1479	Erc1
Ngfrap1	4,82	3,99	1,77	0,0005	0,0146	Ngfrap1
Sema6a	1,2	0,37	1,77	0,0155	0,1204	Sema6a
Usp13	0,93	0,1	1,77	0,0019	0,0334	Usp13
Uck2	3,63	2,81	1,77	0,0108	0,0965	Uck2
Hid1	1,61	0,79	1,77	0,0209	0,1452	Hid1
Slc22a15	1,04	0,22	1,77	0,0064	0,0705	Slc22a15
Creb5	2,31	1,5	1,76	0,0018	0,0322	Creb5
Nefl	2,69	1,87	1,76	0,0005	0,0154	Nefl
Slc45a1	2,07	1,26	1,76	0,0264	0,1690	Slc45a1
9330159F19Rik	1,96	1,14	1,76	0,0068	0,0729	9330159F19Rik
Syp	4,07	3,25	1,76	0,0120	0,1031	Syp
Nphp3	3,95	3,13	1,76	0,0012	0,0253	Nphp3
AA414768	2,66	1,85	1,76	0,0230	0,1551	AA414768
Rph3a	2,8	1,99	1,76	0,0090	0,0856	Rph3a
Kifc1	3,69	2,88	1,76	0,0205	0,1435	Kifc1
Tmem132a	4,85	4,03	1,76	0,0028	0,0425	Tmem132a
Tmem220	2,8	1,98	1,76	0,0188	0,1364	Tmem220
Cbarp	5,09	4,28	1,75	0,0121	0,1031	Cbarp
Gpld1	1,41	0,6	1,75	0,0096	0,0896	Gpld1
Pml	5,58	4,77	1,75	0,0003	0,0121	Pml
Fn1	1,35	0,55	1,75	0,0050	0,0604	Fn1
Zfp395	5,47	4,67	1,75	9,27E-05	0,0059	Zfp395
Fstl4	1,58	0,78	1,75	0,0184	0,1349	Fstl4
Mfsd7a	5,2	4,4	1,75	0,0019	0,0334	Mfsd7a
Abtb2	1,6	0,8	1,75	0,0121	0,1037	Abtb2
Treml4	1,86	1,05	1,74	0,0267	0,1707	Treml4
Enah	2,51	1,71	1,74	0,0304	0,1853	Enah
Rasa2	3,9	3,1	1,74	0,0004	0,0137	Rasa2
Tmem107	2,18	1,38	1,74	0,0323	0,1924	Tmem107
Gnao1	4	3,2	1,74	0,0313	0,1884	Gnao1
Mmp13	0,8	0	1,74	0,0032	0,0460	Mmp13
Kcnn1	2,29	1,49	1,74	0,0067	0,0719	Kcnn1
Rbms1	4,88	4,08	1,74	0,0047	0,0584	Rbms1
Lmntd2	1,91	1,11	1,74	0,0017	0,0315	Lmntd2
Man2a1	4,79	4	1,74	0,0005	0,0150	Man2a1
C5ar1	6,45	5,65	1,74	0,0014	0,0276	C5ar1
Snap25	3,26	2,46	1,74	0,0085	0,0827	Snap25
LOC102637283	0,8	0	1,74	0,0031	0,0449	LOC102637283
Kcnc1	3,41	2,61	1,73	0,0103	0,0936	Kcnc1
Cit	2,88	2,09	1,73	2,03E-05	0,0026	Cit
Mpdz	0,9	0,1	1,73	0,0254	0,1653	Mpdz
Esyt1	7,28	6,48	1,73	0,0001	0,0070	Esyt1
Plpp2	5,7	4,9	1,73	2,67E-06	0,0009	Plpp2
Batf	3,33	2,53	1,73	0,0040	0,0526	Batf
Dock6	4,89	4,1	1,73	0,0020	0,0340	Dock6
Alms1	3,47	2,68	1,73	0,0172	0,1293	Alms1
Irak1bp1	2,52	1,72	1,73	0,0049	0,0594	Irak1bp1
Tlr2	6,64	5,84	1,73	2,91E-05	0,0030	Tlr2
Cacng8	2,53	1,74	1,73	0,0199	0,1411	Cacng8
Gfra2	1,31	0,53	1,73	4,52E-05	0,0038	Gfra2
Plekhg5	5,06	4,27	1,73	0,0039	0,0515	Plekhg5
Prrt3	1,99	1,21	1,73	0,0002	0,0084	Prrt3
Negr1	1,73	0,94	1,72	0,0131	0,1084	Negr1
Echdc2	1,01	0,22	1,72	0,0087	0,0840	Echdc2
Rnf149	5,98	5,19	1,72	0,0014	0,0284	Rnf149
E2f8	2,42	1,63	1,72	0,0012	0,0256	E2f8
Anxa9	3,64	2,85	1,72	0,0071	0,0749	Anxa9
Pla2g16	4,52	3,73	1,72	0,0089	0,0851	Pla2g16
Mmp2	5,61	4,83	1,72	0,0065	0,0706	Mmp2
Tap1	7,24	6,46	1,72	0,0001	0,0068	Tap1
Habp4	4,44	3,66	1,72	0,0023	0,0376	Habp4
Timp2	9,62	8,84	1,71	0,0011	0,0238	Timp2
Adgre5	4,52	3,74	1,71	0,0054	0,0640	Adgre5
Asxl3	1	0,22	1,71	0,0007	0,0177	Asxl3
Sema7a	1,73	0,96	1,71	0,0002	0,0083	Sema7a
Msrb1	6,8	6,02	1,71	0,0002	0,0081	Msrb1
Ms4a8a	0,77	0	1,71	0,0014	0,0280	Ms4a8a
Emp1	0,77	0	1,71	0,0276	0,1745	Emp1
Atg16l2	3,89	3,12	1,71	0,0155	0,1204	Atg16l2
Kcnh3	1,4	0,63	1,71	0,0068	0,0727	Kcnh3
Gpr84	8,24	7,46	1,71	0,0095	0,0890	Gpr84
Gabrb3	1,86	1,09	1,71	0,0125	0,1052	Gabrb3
Fjx1	1,22	0,45	1,71	0,0213	0,1476	Fjx1
Dpep2	2,33	1,56	1,71	0,0161	0,1238	Dpep2
5031425F14Rik	1,92	1,15	1,71	0,0016	0,0303	5031425F14Rik
Eef1a2	2,96	2,19	1,71	0,0171	0,1289	Eef1a2
Chchd10	2,77	2,01	1,7	0,0255	0,1658	Chchd10
Mtcl1	2,41	1,64	1,7	0,0146	0,1160	Mtcl1
Gria4	2,11	1,35	1,7	0,0028	0,0418	Gria4
Rell1	3,5	2,73	1,7	0,0147	0,1167	Rell1
4933432I03Rik	0,87	0,11	1,7	0,0045	0,0571	4933432I03Rik
Rad51b	1,47	0,7	1,7	0,0132	0,1091	Rad51b
Arhgap19	3,11	2,34	1,7	0,0109	0,0968	Arhgap19
Gatm	7,56	6,79	1,7	4,33E-05	0,0037	Gatm
Samd4	2,35	1,58	1,7	0,0002	0,0082	Samd4
Sept5	2,31	1,55	1,7	0,0003	0,0119	Sept5
Foxd2	2	1,24	1,7	0,0014	0,0284	Foxd2
Oas1b	3,57	2,81	1,7	0,0104	0,0943	Oas1b
Pirb	3,49	2,73	1,7	2,88E-05	0,0030	Pirb
Il3ra	2,92	2,16	1,7	0,0276	0,1741	Il3ra
Slc7a4	2,34	1,58	1,69	0,0221	0,1513	Slc7a4
Myo16	1,3	0,54	1,69	0,0020	0,0345	Myo16
Anxa4	6,28	5,52	1,69	0,0016	0,0301	Anxa4
Dennd1a	6,14	5,38	1,69	0,0171	0,1286	Dennd1a
Nampt	6	5,25	1,69	0,0015	0,0289	Nampt
Pcbp4	3,24	2,48	1,69	0,0263	0,1688	Pcbp4
Slc11a1	9,97	9,22	1,69	7,28E-05	0,0050	Slc11a1
Grm8	1,46	0,71	1,69	0,0201	0,1420	Grm8
Lhpp	4,12	3,37	1,69	0,0062	0,0687	Lhpp
Plekho2	8,61	7,86	1,69	0,0096	0,0893	Plekho2
Thbs1	5,66	4,9	1,69	5,21E-05	0,0042	Thbs1
Sybu	1,2	0,45	1,68	0,0125	0,1052	Sybu
Pbxip1	5,69	4,94	1,68	0,0010	0,0221	Pbxip1
Nfkbia	8,25	7,5	1,68	0,0053	0,0632	Nfkbia
Adam22	3,62	2,87	1,68	0,0128	0,1070	Adam22
Nyap1	2,9	2,15	1,68	0,0282	0,1770	Nyap1
Arhgap33	2,85	2,1	1,68	0,0284	0,1776	Arhgap33
Elavl2	1,53	0,78	1,68	0,0006	0,0168	Elavl2
Fam3c	6,67	5,92	1,68	3,19E-05	0,0031	Fam3c
Gadd45g	6,2	5,45	1,68	0,0016	0,0303	Gadd45g
Epha10	1,66	0,91	1,68	0,0229	0,1548	Epha10
Syne3	0,96	0,21	1,68	0,0016	0,0301	Syne3
Cd24a	1,38	0,63	1,68	0,0072	0,0757	Cd24a
Tmem171	0,75	0	1,68	0,0095	0,0888	Tmem171
Ntrk3	3,35	2,6	1,68	0,0042	0,0539	Ntrk3
Nrsn1	2,14	1,39	1,68	0,0275	0,1738	Nrsn1
Dennd3	3,77	3,02	1,68	0,0011	0,0244	Dennd3
Itgb7	0,85	0,1	1,68	0,0006	0,0162	Itgb7
Fam49a	5,92	5,18	1,67	0,0065	0,0708	Fam49a
Dapk1	5,81	5,07	1,67	0,0045	0,0569	Dapk1
Ly6h	2,27	1,52	1,67	0,0048	0,0589	Ly6h
Vps13c	5,79	5,05	1,67	0,0031	0,0449	Vps13c
Gca	4,06	3,31	1,67	0,0014	0,0279	Gca
Mical2	3,41	2,67	1,67	0,0285	0,1782	Mical2
Tmem106a	5,2	4,46	1,67	0,0025	0,0389	Tmem106a
Rap2a	7,7	6,96	1,67	0,0007	0,0181	Rap2a
Ttyh2	5,64	4,9	1,67	0,0024	0,0378	Ttyh2
Pdgfc	1,97	1,24	1,67	0,0090	0,0859	Pdgfc
Nmnat2	1,34	0,6	1,67	0,0246	0,1622	Nmnat2
Soat1	6,25	5,51	1,67	0,0037	0,0504	Soat1
Tuft1	3,26	2,52	1,67	0,0073	0,0764	Tuft1
Fcgr2b	2,17	1,43	1,67	0,0139	0,1128	Fcgr2b
Gm19557	0,74	0	1,67	0,0336	0,1967	Gm19557
Adk	3,63	2,89	1,67	0,0288	0,1793	Adk
Psen2	6,49	5,76	1,66	0,0017	0,0307	Psen2
Ephb2	1,61	0,88	1,66	0,0143	0,1147	Ephb2
Mmp12	1,44	0,71	1,66	0,0233	0,1565	Mmp12
Nrxn2	3,7	2,96	1,66	0,0079	0,0800	Nrxn2
Dclk1	1,78	1,04	1,66	0,0036	0,0491	Dclk1
Scpep1	7,01	6,28	1,66	0,0016	0,0300	Scpep1
Gm29907	1,33	0,6	1,66	0,0209	0,1454	Gm29907
Kcnh1	2,22	1,49	1,66	0,0335	0,1964	Kcnh1
Nfkbid	6,3	5,57	1,66	0,0103	0,0936	Nfkbid
B230217C12Rik	2,12	1,39	1,66	0,0009	0,0209	B230217C12Rik
Atp2a3	4,79	4,07	1,66	0,0027	0,0411	Atp2a3
A930017M01Rik	1,17	0,44	1,66	0,0078	0,0789	A930017M01Rik
Fam26f	4,85	4,13	1,66	9,95E-05	0,0061	Fam26f
Hpse	1,56	0,83	1,66	0,0270	0,1719	Hpse
Rnf145	6,33	5,6	1,66	0,0006	0,0169	Rnf145
Ier2	4,23	3,5	1,66	0,0332	0,1955	Ier2
Ptprz1	1,33	0,6	1,65	0,0009	0,0205	Ptprz1
Car11	3,7	2,97	1,65	0,0045	0,0566	Car11
Tmem57	4,84	4,12	1,65	0,0003	0,0123	Tmem57
Trp53inp2	4,5	3,78	1,65	0,0175	0,1305	Trp53inp2
Sh3bgrl3	8,31	7,59	1,65	0,0119	0,1026	Sh3bgrl3
Syt14	1,39	0,67	1,65	0,0229	0,1548	Syt14
Stim2	5,43	4,71	1,65	0,0018	0,0317	Stim2
Raet1d	0,72	0	1,65	0,0027	0,0410	Raet1d
Dgkz	8,51	7,78	1,65	0,0015	0,0295	Dgkz
Plaur	5,77	5,05	1,65	0,0079	0,0800	Plaur
Gna14	2,74	2,02	1,65	0,0279	0,1758	Gna14
Nrg2	1,41	0,69	1,65	0,0329	0,1944	Nrg2
Dnah17	0,96	0,24	1,65	0,0342	0,1993	Dnah17
Mansc1	0,93	0,22	1,65	0,0072	0,0755	Mansc1
Slit3	1,91	1,19	1,64	0,0228	0,1546	Slit3
Ndrg2	2,71	1,99	1,64	0,0195	0,1401	Ndrg2
Insig1	4,63	3,91	1,64	0,0039	0,0513	Insig1
Caprin2	2,06	1,35	1,64	0,0005	0,0145	Caprin2
Racgap1	4,42	3,7	1,64	0,0030	0,0435	Racgap1
Dok3	8,43	7,72	1,64	0,0035	0,0481	Dok3
Strip2	1,32	0,61	1,64	0,0018	0,0318	Strip2
Pdlim2	5,6	4,89	1,64	5,74E-05	0,0043	Pdlim2
Snx8	7,41	6,7	1,64	0,0002	0,0077	Snx8
Tmem132b	2,4	1,69	1,64	0,0015	0,0293	Tmem132b
Gm14005	3,62	2,91	1,64	0,0050	0,0603	Gm14005
Capg	5,6	4,89	1,64	0,0002	0,0100	Capg
Ctsd	15,16	14,45	1,64	0,0037	0,0499	Ctsd
Resp18	1,22	0,52	1,64	0,0024	0,0380	Resp18
Rims1	1,16	0,45	1,64	0,0073	0,0761	Rims1
Rhod	0,82	0,11	1,63	0,0012	0,0255	Rhod
Map3k5	5,46	4,75	1,63	0,0058	0,0667	Map3k5
Mab21l3	0,71	0	1,63	0,0066	0,0718	Mab21l3
Aldoc	5,04	4,34	1,63	0,0261	0,1680	Aldoc
Taf1b	5,91	5,21	1,63	0,0057	0,0662	Taf1b
Kcnc3	2,24	1,53	1,63	0,0155	0,1204	Kcnc3
Baiap2	4,62	3,92	1,63	0,0196	0,1401	Baiap2
Lmnb1	3,58	2,88	1,63	0,0013	0,0259	Lmnb1
Rpgrip1	1,06	0,35	1,63	0,0023	0,0369	Rpgrip1
Cacna1a	5,31	4,61	1,63	2,05E-05	0,0026	Cacna1a
Aplp2	7,62	6,92	1,63	0,0001	0,0072	Aplp2
Siglece	8,71	8,01	1,62	0,0003	0,0111	Siglece
Kcna6	1,91	1,21	1,62	0,0105	0,0947	Kcna6
Gm30908	1,02	0,32	1,62	0,0328	0,1943	Gm30908
Ephb6	0,9	0,2	1,62	0,0109	0,0968	Ephb6
Rilpl2	3,99	3,29	1,62	0,0108	0,0959	Rilpl2
Fkbp1b	2,1	1,4	1,62	0,0066	0,0716	Fkbp1b
Parvb	5,6	4,9	1,62	0,0015	0,0285	Parvb
Nupr1	5,24	4,54	1,62	0,0089	0,0852	Nupr1
Gm2a	7,34	6,65	1,62	0,0012	0,0257	Gm2a
Plppr4	2,63	1,94	1,62	0,0049	0,0594	Plppr4
Cracr2a	5,6	4,91	1,62	0,0003	0,0121	Cracr2a
Mta3	7,14	6,44	1,62	0,0013	0,0268	Mta3
Ccdc88c	1,67	0,98	1,62	0,0292	0,1811	Ccdc88c
Aatk	4,18	3,48	1,62	3,33E-05	0,0032	Aatk
Pla2g2d	0,91	0,21	1,62	0,0140	0,1131	Pla2g2d
Shcbp1l	1,49	0,79	1,62	0,0005	0,0144	Shcbp1l
Arfgef2	5,21	4,52	1,62	0,0225	0,1531	Arfgef2
Plec	3,79	3,1	1,62	0,0016	0,0297	Plec
1190002N15Rik	6,25	5,56	1,61	0,0007	0,0189	1190002N15Rik
Tpk1	3,81	3,12	1,61	0,0004	0,0126	Tpk1
9330179D12Rik	0,69	0	1,61	0,0025	0,0390	9330179D12Rik
Jph3	2,67	1,98	1,61	0,0167	0,1267	Jph3
Slamf6	3,98	3,29	1,61	0,0120	0,1031	Slamf6
Degs1	6,63	5,94	1,61	0,0003	0,0120	Degs1
Gdf15	1,38	0,69	1,61	0,0062	0,0689	Gdf15
Net1	2,01	1,33	1,61	0,0147	0,1169	Net1
Cntn2	3,18	2,5	1,61	0,0255	0,1657	Cntn2
Dcstamp	0,69	0	1,61	0,0249	0,1633	Dcstamp
Atcay	2,12	1,43	1,61	0,0031	0,0450	Atcay
Pcdh1	3,33	2,64	1,61	0,0041	0,0531	Pcdh1
Gm4951	0,8	0,11	1,61	0,0057	0,0662	Gm4951
Tctex1d4	1,25	0,57	1,61	0,0117	0,1015	Tctex1d4
Zfp462	1,16	0,48	1,61	0,0035	0,0481	Zfp462
Mpped1	1,62	0,93	1,61	0,0193	0,1396	Mpped1
Uhrf1bp1l	5,12	4,44	1,6	0,0005	0,0154	Uhrf1bp1l
Endou	0,68	0	1,6	0,0021	0,0352	Endou
Pcdh11x	0,85	0,17	1,6	0,0179	0,1325	Pcdh11x
Mfsd12	6,93	6,25	1,6	0,0002	0,0094	Mfsd12
Mtmr12	5,4	4,72	1,6	1,33E-05	0,0021	Mtmr12
Acbd4	1,01	0,33	1,6	0,0082	0,0816	Acbd4
Pid1	4,86	4,19	1,6	0,0056	0,0651	Pid1
Smim14	6,27	5,59	1,6	0,0002	0,0078	Smim14
Arhgap18	5,81	5,13	1,6	0,0073	0,0762	Arhgap18
Nr4a1	3,24	2,56	1,6	0,0082	0,0814	Nr4a1
Tor3a	6,74	6,07	1,59	0,0045	0,0569	Tor3a
Tpd52	7,97	7,3	1,59	0,0038	0,0512	Tpd52
Rab13	1,46	0,79	1,59	0,0071	0,0750	Rab13
Rdh5	2,94	2,27	1,59	0,0127	0,1067	Rdh5
Gm12589	0,67	0	1,59	0,0002	0,0100	Gm12589
LOC102632778	0,8	0,13	1,59	0,0079	0,0798	LOC102632778
Bex2	2,72	2,05	1,59	0,0064	0,0705	Bex2
Itpka	1,4	0,73	1,59	0,0297	0,1831	Itpka
Nrgn	2,51	1,84	1,59	0,0048	0,0589	Nrgn
Tmem59l	3,14	2,48	1,59	0,0061	0,0682	Tmem59l
Glb1	7,94	7,28	1,59	0,0007	0,0189	Glb1
Kcnk2	0,78	0,11	1,59	0,0307	0,1863	Kcnk2
Gm14461	0,67	0	1,59	0,0001	0,0075	Gm14461
Cd48	6,48	5,82	1,59	3,40E-05	0,0032	Cd48
Epb41l1	2,47	1,81	1,58	0,0123	0,1046	Epb41l1
Aim1	1,86	1,2	1,58	0,0025	0,0391	Aim1
Amer2	3,24	2,58	1,58	0,0101	0,0922	Amer2
Tmem35	1,06	0,4	1,58	0,0321	0,1919	Tmem35
Agpat4	2,64	1,98	1,58	0,0085	0,0830	Agpat4
Abca1	10,13	9,47	1,58	0,0097	0,0900	Abca1
Mbd4	1,19	0,53	1,58	0,0172	0,1293	Mbd4
Sh2b1	7,8	7,14	1,58	0,0012	0,0255	Sh2b1
LOC102638940	1,76	1,1	1,58	0,0021	0,0347	LOC102638940
Adam9	6,42	5,76	1,58	0,0006	0,0167	Adam9
March3	4,46	3,8	1,58	0,0006	0,0171	March3
Gm32633	1,1	0,44	1,58	0,0058	0,0668	Gm32633
Plscr1	2,08	1,43	1,58	0,0086	0,0835	Plscr1
Bambi	2,18	1,53	1,58	0,0036	0,0497	Bambi
Tppp3	1,21	0,55	1,58	0,0316	0,1898	Tppp3
Ovol2	0,66	0	1,58	0,0252	0,1644	Ovol2
Snap91	2,01	1,36	1,58	0,0009	0,0206	Snap91
Dscam	1,1	0,44	1,58	0,0043	0,0547	Dscam
Tlcd1	1,11	0,45	1,58	0,0128	0,1070	Tlcd1
Sh3rf1	2,13	1,47	1,58	0,0117	0,1017	Sh3rf1
Morn1	2,74	2,09	1,58	0,0057	0,0662	Morn1
Ppp2r5b	5,18	4,52	1,57	0,0017	0,0316	Ppp2r5b
Myo9b	8,61	7,96	1,57	0,0153	0,1192	Myo9b
Kif1c	5,93	5,27	1,57	0,0119	0,1026	Kif1c
Robo1	1,26	0,6	1,57	6,43E-05	0,0047	Robo1
4933424M12Rik	2,62	1,97	1,57	0,0297	0,1828	4933424M12Rik
Eogt	6,55	5,9	1,57	0,0008	0,0193	Eogt
Tmed1	3,79	3,14	1,57	0,0106	0,0951	Tmed1
Rhbdf2	6,88	6,23	1,57	0,0019	0,0334	Rhbdf2
Tnk2	2,62	1,97	1,57	0,0344	0,1999	Tnk2
5830416I19Rik	0,65	0	1,57	0,0300	0,1840	5830416I19Rik
Osbpl3	2,32	1,67	1,57	0,0009	0,0211	Osbpl3
Atpif1	1,15	0,5	1,57	0,0316	0,1896	Atpif1
Ebi3	6,15	5,5	1,57	0,0006	0,0162	Ebi3
Lmo7	0,94	0,29	1,57	0,0009	0,0206	Lmo7
Syt11	5,78	5,13	1,57	0,0013	0,0261	Syt11
Ticrr	1,48	0,83	1,57	0,0123	0,1044	Ticrr
Rnase2a	0,65	0	1,57	0,0023	0,0376	Rnase2a
Nudt1	3,18	2,53	1,57	0,0171	0,1289	Nudt1
Ero1l	5,44	4,79	1,57	0,0004	0,0137	Ero1l
Slco3a1	2,22	1,57	1,57	0,0300	0,1839	Slco3a1
Adcy9	6,02	5,37	1,57	0,0012	0,0251	Adcy9
Sdr39u1	2,19	1,55	1,56	0,0021	0,0350	Sdr39u1
Cyp51	3,71	3,06	1,56	0,0136	0,1107	Cyp51
Fam229b	1,74	1,09	1,56	0,0151	0,1183	Fam229b
Tshz3	0,64	0	1,56	0,0008	0,0191	Tshz3
Ier5l	1,37	0,73	1,56	0,0177	0,1319	Ier5l
Mcoln2	0,64	0	1,56	7,67E-07	0,0007	Mcoln2
Grk6	7,57	6,93	1,56	0,0139	0,1125	Grk6
Hacd2	5,98	5,34	1,56	0,0068	0,0728	Hacd2
Kcnd2	2,86	2,22	1,56	0,0052	0,0618	Kcnd2
Ctsb	12,55	11,91	1,56	0,0005	0,0148	Ctsb
Gch1	3,31	2,67	1,56	0,0085	0,0828	Gch1
Tctn3	4,76	4,12	1,56	0,0098	0,0910	Tctn3
Pmm1	1,62	0,98	1,56	0,0238	0,1589	Pmm1
Ifit2	2,09	1,46	1,56	0,0020	0,0341	Ifit2
Spred2	6,13	5,49	1,55	0,0073	0,0759	Spred2
Gys1	4,85	4,21	1,55	0,0096	0,0896	Gys1
Susd6	7,29	6,66	1,55	0,0015	0,0287	Susd6
Serpinb7	0,64	0	1,55	0,0089	0,0849	Serpinb7
Egfl7	1,39	0,75	1,55	0,0203	0,1429	Egfl7
Csmd2	1,18	0,55	1,55	0,0166	0,1263	Csmd2
Sept9	4,41	3,78	1,55	0,0016	0,0297	Sept9
Epha2	7,26	6,63	1,55	0,0209	0,1453	Epha2
Slc5a6	5,02	4,38	1,55	0,0068	0,0730	Slc5a6
Akr1c12	0,63	0	1,55	0,0035	0,0485	Akr1c12
Gbp3	5,93	5,3	1,55	0,0159	0,1228	Gbp3
Ybx1	7,64	7,01	1,55	0,0005	0,0150	Ybx1
Rragb	0,92	0,3	1,55	0,0179	0,1326	Rragb
Ndst1	6,6	5,98	1,54	0,0041	0,0535	Ndst1
C330027C09Rik	2,02	1,39	1,54	0,0202	0,1426	C330027C09Rik
Igsf8	4,16	3,54	1,54	0,0091	0,0863	Igsf8
Stx1b	1,93	1,3	1,54	0,0166	0,1267	Stx1b
Gabra5	0,84	0,21	1,54	0,0283	0,1776	Gabra5
Chrna7	1,05	0,42	1,54	0,0008	0,0191	Chrna7
Gm31633	0,63	0	1,54	0,0121	0,1032	Gm31633
L1cam	1,79	1,16	1,54	0,0013	0,0266	L1cam
Tec	6,69	6,06	1,54	0,0021	0,0354	Tec
Hcst	4,82	4,2	1,54	0,0055	0,0642	Hcst
Pcnx	6,06	5,44	1,54	0,0008	0,0192	Pcnx
Inpp4a	6,11	5,49	1,54	0,0234	0,1570	Inpp4a
Tmem123	7,98	7,36	1,54	0,0044	0,0562	Tmem123
C130050O18Rik	4,76	4,14	1,54	0,0007	0,0190	C130050O18Rik
Pbdc1	3,51	2,88	1,54	0,0007	0,0186	Pbdc1
Dscaml1	2,13	1,51	1,54	0,0038	0,0507	Dscaml1
Cplx1	2,09	1,46	1,54	0,0076	0,0779	Cplx1
LOC102637873	1,22	0,6	1,54	0,0120	0,1028	LOC102637873
Enkd1	3,09	2,47	1,54	0,0234	0,1573	Enkd1
Rhbdl3	0,98	0,36	1,54	0,0330	0,1946	Rhbdl3
Slc6a6	8,42	7,8	1,54	0,0004	0,0140	Slc6a6
Agrn	3,6	2,97	1,54	0,0036	0,0497	Agrn
Smyd2	3,81	3,19	1,54	0,0030	0,0437	Smyd2
Klhl13	3,56	2,94	1,54	0,0041	0,0538	Klhl13
Gabra4	1,59	0,97	1,54	0,0009	0,0217	Gabra4
Slc1a4	4,96	4,34	1,54	0,0282	0,1769	Slc1a4
Mtrf1	4,49	3,87	1,54	0,0014	0,0281	Mtrf1
Sesn1	7,59	6,97	1,53	0,0020	0,0343	Sesn1
Akap10	5,68	5,07	1,53	0,0042	0,0542	Akap10
Shank1	2,48	1,86	1,53	0,0267	0,1707	Shank1
Me3	0,9	0,29	1,53	0,0033	0,0467	Me3
Smagp	6,04	5,43	1,53	0,0085	0,0829	Smagp
Stx16	7,8	7,18	1,53	0,0073	0,0759	Stx16
Anpep	0,92	0,31	1,53	0,0250	0,1641	Anpep
Rgs14	5,45	4,84	1,53	0,0042	0,0539	Rgs14
Cuedc1	1,25	0,64	1,53	0,0307	0,1861	Cuedc1
Rep15	0,98	0,36	1,53	0,0141	0,1137	Rep15
Pdgfa	6,04	5,43	1,53	1,46E-05	0,0022	Pdgfa
Epb41l3	5,49	4,87	1,53	0,0059	0,0671	Epb41l3
Asic4	1,16	0,55	1,53	0,0016	0,0303	Asic4
Stk17b	5,8	5,19	1,53	0,0024	0,0378	Stk17b
Gad2	0,81	0,2	1,53	0,0306	0,1857	Gad2
Mcm9	5,25	4,64	1,53	0,0173	0,1298	Mcm9
Ift43	2,47	1,85	1,53	0,0021	0,0347	Ift43
Cadm1	8,66	8,05	1,53	0,0016	0,0303	Cadm1
Fcna	1,05	0,44	1,53	0,0035	0,0486	Fcna
Ccdc171	1,77	1,16	1,53	0,0022	0,0360	Ccdc171
Tmem191c	1,66	1,05	1,52	0,0163	0,1248	Tmem191c
Cacnb1	1,91	1,3	1,52	0,0199	0,1411	Cacnb1
Grina	9,47	8,86	1,52	0,0001	0,0068	Grina
Daam1	5,03	4,42	1,52	0,0085	0,0828	Daam1
Slc16a10	5,11	4,5	1,52	0,0004	0,0139	Slc16a10
Mtss1l	2,63	2,02	1,52	0,0208	0,1450	Mtss1l
Hps5	7,07	6,46	1,52	0,0005	0,0150	Hps5
Gaa	8,46	7,85	1,52	0,0015	0,0288	Gaa
Retsat	4,91	4,3	1,52	0,0059	0,0672	Retsat
Grid2ip	1,14	0,54	1,52	0,0065	0,0709	Grid2ip
Gm20172	1,18	0,58	1,52	0,0207	0,1446	Gm20172
Ube2l6	5,29	4,69	1,52	0,0005	0,0159	Ube2l6
Gm20594	0,9	0,3	1,52	0,0328	0,1943	Gm20594
Pilrb2	0,6	0	1,52	0,0243	0,1609	Pilrb2
Cspg4	1,38	0,78	1,52	0,0236	0,1580	Cspg4
Sobp	1,64	1,04	1,51	0,0155	0,1203	Sobp
1110001J03Rik	3,62	3,02	1,51	0,0215	0,1486	1110001J03Rik
Slc8b1	6,89	6,29	1,51	0,0014	0,0276	Slc8b1
Rap1gap	1,33	0,73	1,51	0,0063	0,0694	Rap1gap
Arrdc2	5,17	4,58	1,51	0,0055	0,0649	Arrdc2
Flot2	6,15	5,55	1,51	0,0033	0,0470	Flot2
Sez6l2	4,72	4,12	1,51	0,0057	0,0659	Sez6l2
Wnt7b	0,98	0,39	1,51	0,0011	0,0242	Wnt7b
1700007L15Rik	2,05	1,46	1,51	0,0237	0,1586	1700007L15Rik
Galnt7	7,13	6,53	1,51	0,0010	0,0224	Galnt7
Ptprc	7,7	7,11	1,51	0,0003	0,0112	Ptprc
Xist	10,41	9,81	1,51	0,0124	0,1047	Xist
Egr2	0,96	0,37	1,51	0,0239	0,1594	Egr2
Dclre1c	7,7	7,11	1,51	0,0042	0,0544	Dclre1c
Fstl5	1,13	0,54	1,51	0,0178	0,1319	Fstl5
Tomm7	5,01	4,42	1,51	0,0087	0,0842	Tomm7
Klra17	0,59	0	1,51	0,0025	0,0393	Klra17
Eid1	1,76	1,17	1,51	0,0285	0,1780	Eid1
Gltp	6,26	5,67	1,51	0,0146	0,1162	Gltp
S1pr1	8,33	7,74	1,51	0,0013	0,0264	S1pr1
Atp2b3	3,52	2,93	1,5	0,0106	0,0955	Atp2b3
Ltk	0,59	0	1,5	0,0264	0,1690	Ltk
Ptprj	9,27	8,68	1,5	0,0023	0,0372	Ptprj
Cask	3,07	2,48	1,5	0,0238	0,1588	Cask
Slc35d2	3,82	3,23	1,5	0,0067	0,0722	Slc35d2
4833419F23Rik	1,27	0,68	1,5	0,0111	0,0978	4833419F23Rik
Gpsm2	0,78	0,2	1,5	0,0201	0,1421	Gpsm2
Slc6a1	4,26	3,68	1,5	0,0058	0,0667	Slc6a1
2610020H08Rik	1,61	1,03	1,5	0,0012	0,0253	2610020H08Rik
Atp6v0d2	0,59	0	1,5	0,0168	0,1274	Atp6v0d2
Ak5	0,86	0,27	1,5	0,0009	0,0217	Ak5
Kif7	1,19	0,6	1,5	0,0148	0,1173	Kif7
Spryd7	4,24	3,66	1,5	0,0097	0,0903	Spryd7
Mex3d	4,77	5,36	-1,5	0,0038	0,0509	Mex3d
Usp6nl	3,84	4,43	-1,5	0,0075	0,0772	Usp6nl
Cds2	8,69	9,28	-1,5	0,0012	0,0258	Cds2
Scaf11	5,14	5,73	-1,5	0,0150	0,1180	Scaf11
Map4k5	5,76	6,35	-1,5	0,0090	0,0856	Map4k5
Rgs10	9,51	10,11	-1,51	0,0002	0,0080	Rgs10
Tmod3	3,79	4,38	-1,51	0,0030	0,0438	Tmod3
Tspan33	4,93	5,52	-1,51	0,0009	0,0207	Tspan33
Slc25a45	7,79	8,39	-1,51	0,0060	0,0673	Slc25a45
Slco2b1	10,51	11,1	-1,51	0,0005	0,0150	Slco2b1
Cpox	4,54	5,14	-1,51	0,0027	0,0409	Cpox
Rgs2	9,17	9,77	-1,51	0,0013	0,0260	Rgs2
Plekho1	8,84	9,43	-1,51	0,0026	0,0402	Plekho1
Bckdha	7,09	7,68	-1,51	0,0032	0,0460	Bckdha
Vapa	6,22	6,81	-1,51	0,0299	0,1838	Vapa
Pear1	5,12	5,71	-1,51	0,0031	0,0453	Pear1
Bin1	10,75	11,35	-1,51	9,05E-05	0,0058	Bin1
Akr1b10	5,18	5,78	-1,51	2,12E-06	0,0008	Akr1b10
Mef2d	3,43	4,03	-1,51	0,0305	0,1856	Mef2d
4930447M23Rik	2,16	2,76	-1,51	0,0011	0,0247	4930447M23Rik
Mex3a	1,04	1,64	-1,51	0,0131	0,1082	Mex3a
Gata2	0,1	0,7	-1,52	0,0178	0,1319	Gata2
Mdp1	4,15	4,75	-1,52	0,0254	0,1655	Mdp1
Shb	4	4,6	-1,52	0,0029	0,0426	Shb
Zfpm1	6,55	7,16	-1,52	0,0001	0,0071	Zfpm1
Wdr78	0,55	1,16	-1,53	0,0043	0,0550	Wdr78
Pld1	8,05	8,66	-1,53	0,0065	0,0706	Pld1
Eif4g2	7,9	8,51	-1,53	0,0024	0,0380	Eif4g2
Ebf3	4,01	4,62	-1,53	0,0139	0,1124	Ebf3
Eefsec	4,93	5,54	-1,53	0,0003	0,0117	Eefsec
Chsy1	7,98	8,59	-1,53	0,0212	0,1470	Chsy1
Nmi	4,13	4,75	-1,53	0,0048	0,0593	Nmi
Fzd4	5,63	6,25	-1,53	0,0038	0,0509	Fzd4
Foxk2	6,46	7,08	-1,53	2,73E-05	0,0029	Foxk2
Arl15	4,18	4,79	-1,53	0,0027	0,0414	Arl15
Usp21	6,37	6,99	-1,53	0,0093	0,0876	Usp21
Pnpla8	4,52	5,14	-1,53	0,0005	0,0157	Pnpla8
Sik2	3,69	4,31	-1,53	0,0003	0,0120	Sik2
Hpgds	8,91	9,53	-1,54	0,0049	0,0594	Hpgds
Hcfc2	4,11	4,73	-1,54	0,0064	0,0705	Hcfc2
Ypel2	4,37	4,99	-1,54	0,0078	0,0790	Ypel2
Csrnp2	3,91	4,53	-1,54	0,0197	0,1404	Csrnp2
A830052D11Rik	0,78	1,4	-1,54	0,0248	0,1633	A830052D11Rik
Nxpe3	3,63	4,25	-1,54	0,0057	0,0659	Nxpe3
Ppp2ca	8,62	9,24	-1,54	0,0095	0,0888	Ppp2ca
Sla	8,33	8,96	-1,54	0,0110	0,0973	Sla
Fam102b	8,27	8,89	-1,54	0,0027	0,0411	Fam102b
Clstn1	8,68	9,3	-1,54	0,0009	0,0211	Clstn1
LOC105245439	4,01	4,63	-1,54	0,0225	0,1533	LOC105245439
Man1a	6,68	7,3	-1,54	0,0018	0,0322	Man1a
Cnot8	7,05	7,68	-1,54	0,0019	0,0329	Cnot8
Apool	3,78	4,4	-1,54	0,0140	0,1131	Apool
Ubac1	4,41	5,04	-1,54	0,0201	0,1420	Ubac1
Zcchc14	4,75	5,37	-1,54	0,0001	0,0073	Zcchc14
Zfp36l3	0,82	1,44	-1,54	0,0196	0,1402	Zfp36l3
Arhgap5	7,11	7,74	-1,55	0,0010	0,0226	Arhgap5
Smad3	7,21	7,84	-1,55	0,0273	0,1729	Smad3
Rasgrp3	6,47	7,1	-1,55	0,0007	0,0186	Rasgrp3
Man1a2	6,23	6,86	-1,55	0,0027	0,0412	Man1a2
Senp6	3,5	4,13	-1,55	0,0262	0,1685	Senp6
4933411K16Rik	2,21	2,84	-1,55	0,0252	0,1644	4933411K16Rik
Kdm2b	3,42	4,05	-1,55	0,0003	0,0107	Kdm2b
Gm6402	2,14	2,77	-1,55	0,0210	0,1455	Gm6402
Fkbp9	4,22	4,86	-1,55	0,0058	0,0667	Fkbp9
Klhl36	5,25	5,89	-1,56	0,0045	0,0570	Klhl36
Eid2b	3,18	3,81	-1,56	0,0004	0,0137	Eid2b
Fzd8	0,21	0,85	-1,56	0,0024	0,0378	Fzd8
Btbd3	3,83	4,47	-1,56	0,0311	0,1878	Btbd3
Gm6277	4,99	5,63	-1,56	0,0093	0,0874	Gm6277
Naaa	5,06	5,7	-1,56	0,0062	0,0692	Naaa
Hk1	3,98	4,63	-1,56	0,0049	0,0594	Hk1
Tbc1d16	7,12	7,77	-1,57	0,0004	0,0129	Tbc1d16
Tal1	4,94	5,59	-1,57	0,0019	0,0334	Tal1
Glul	8,49	9,14	-1,57	0,0031	0,0449	Glul
Bach2	5,59	6,24	-1,57	0,0011	0,0240	Bach2
Snx10	5,6	6,25	-1,57	0,0060	0,0679	Snx10
B130006D01Rik	3,89	4,54	-1,57	0,0229	0,1548	B130006D01Rik
Pitpnc1	6,28	6,93	-1,57	0,0002	0,0086	Pitpnc1
Lpp	4,86	5,52	-1,57	0,0082	0,0815	Lpp
Bard1	1,78	2,44	-1,57	0,0298	0,1834	Bard1
Mertk	7,04	7,69	-1,58	0,0025	0,0392	Mertk
Cdkl4	1,24	1,9	-1,58	0,0070	0,0744	Cdkl4
Slc46a3	5,66	6,32	-1,58	0,0014	0,0280	Slc46a3
Ppp2r1b	6,17	6,83	-1,58	0,0006	0,0162	Ppp2r1b
Ryk	3,93	4,59	-1,58	0,0085	0,0827	Ryk
Gclc	5,77	6,43	-1,58	0,0028	0,0423	Gclc
Nr1d2	6,44	7,11	-1,58	0,0088	0,0844	Nr1d2
Frat1	3,71	4,37	-1,58	0,0006	0,0169	Frat1
Hhex	6,54	7,2	-1,58	0,0001	0,0071	Hhex
Trio	8,19	8,85	-1,58	0,0006	0,0162	Trio
Efna5	0,82	1,48	-1,58	0,0226	0,1534	Efna5
Trp53cor1	2,91	3,57	-1,59	0,0080	0,0805	Trp53cor1
Gm11827	0,24	0,91	-1,59	0,0066	0,0715	Gm11827
Prps2	5,1	5,77	-1,59	0,0048	0,0588	Prps2
Natd1	5,46	6,12	-1,59	0,0040	0,0527	Natd1
Tanc2	10,08	10,75	-1,59	0,0031	0,0454	Tanc2
Bmi1	4,55	5,22	-1,59	0,0031	0,0445	Bmi1
Arcn1	6,34	7,01	-1,59	0,0268	0,1711	Arcn1
Map3k9	5,67	6,34	-1,59	0,0003	0,0111	Map3k9
Ctnnal1	3,04	3,71	-1,59	0,0086	0,0835	Ctnnal1
Mapk12	0,11	0,77	-1,59	0,0052	0,0619	Mapk12
Elmo1	8,41	9,08	-1,59	0,0001	0,0062	Elmo1
Il6st	8,87	9,54	-1,59	0,0139	0,1126	Il6st
Snx29	7,13	7,8	-1,59	0,0002	0,0085	Snx29
Pkp4	4,83	5,5	-1,59	0,0031	0,0450	Pkp4
Gm3325	1,71	2,38	-1,59	0,0005	0,0145	Gm3325
Rasal2	3,93	4,6	-1,59	0,0081	0,0811	Rasal2
Fam72a	2,83	3,5	-1,59	0,0019	0,0334	Fam72a
Cdk5rap3	4,31	4,98	-1,59	0,0059	0,0672	Cdk5rap3
Pde1b	7,07	7,74	-1,59	0,0272	0,1723	Pde1b
Fuk	2,93	3,6	-1,59	0,0038	0,0509	Fuk
Marcks	6,19	6,86	-1,59	0,0006	0,0161	Marcks
4933421O10Rik	2,55	3,22	-1,6	0,0047	0,0583	4933421O10Rik
Sv2a	4,78	5,46	-1,6	0,0055	0,0643	Sv2a
Lpcat3	6,74	7,41	-1,6	3,89E-05	0,0035	Lpcat3
Ptpn12	3,24	3,92	-1,6	0,0002	0,0080	Ptpn12
Pik3c2b	4,48	5,15	-1,6	0,0100	0,0916	Pik3c2b
Nck1	5,07	5,75	-1,6	0,0015	0,0287	Nck1
Pde3b	8,81	9,49	-1,6	0,0002	0,0082	Pde3b
Fkbp11	0,37	1,04	-1,6	0,0027	0,0411	Fkbp11
Sardh	2,67	3,35	-1,6	0,0004	0,0132	Sardh
Rxfp1	0	0,68	-1,6	0,0059	0,0670	Rxfp1
Glis3	0	0,68	-1,6	0,0003	0,0105	Glis3
P2rx1	3,91	4,59	-1,6	0,0287	0,1790	P2rx1
Srgap2	9,41	10,1	-1,6	0,0014	0,0280	Srgap2
Vash1	4,49	5,17	-1,61	0,0061	0,0681	Vash1
Cdc42bpa	2,64	3,32	-1,61	0,0039	0,0514	Cdc42bpa
Fam167b	3,47	4,15	-1,61	0,0242	0,1606	Fam167b
Amotl1	3,59	4,28	-1,61	0,0070	0,0744	Amotl1
Pten	6,86	7,55	-1,61	0,0011	0,0239	Pten
Rrp1b	5,59	6,28	-1,61	0,0015	0,0285	Rrp1b
8030442B05Rik	5,62	6,31	-1,61	0,0099	0,0916	8030442B05Rik
Oxct1	5,96	6,65	-1,62	0,0049	0,0594	Oxct1
Tpgs1	4,26	4,95	-1,62	0,0255	0,1656	Tpgs1
Cep85l	5,07	5,77	-1,62	0,0060	0,0678	Cep85l
Bcat1	1,29	1,98	-1,62	0,0036	0,0497	Bcat1
Nbea	4,34	5,04	-1,62	0,0025	0,0389	Nbea
Lpin1	6,76	7,46	-1,62	0,0010	0,0231	Lpin1
Lzts2	3,95	4,65	-1,62	2,47E-05	0,0028	Lzts2
Adtrp	1,65	2,35	-1,62	0,0142	0,1141	Adtrp
S1pr4	3,72	4,42	-1,62	0,0042	0,0544	S1pr4
St3gal6	8,16	8,86	-1,62	0,0054	0,0639	St3gal6
Pygm	2,74	3,44	-1,63	0,0108	0,0965	Pygm
Prkx	5,06	5,76	-1,63	0,0018	0,0328	Prkx
Ccl6	6,68	7,38	-1,63	0,0032	0,0462	Ccl6
Tfpi	5,74	6,44	-1,63	0,0010	0,0229	Tfpi
Sdccag3	6,33	7,04	-1,63	0,0232	0,1561	Sdccag3
Ppp1r13l	2,74	3,44	-1,63	0,0181	0,1335	Ppp1r13l
Abcg3	1,32	2,02	-1,63	0,0182	0,1336	Abcg3
Slc16a1	4,07	4,77	-1,63	0,0005	0,0143	Slc16a1
Cfh	9,95	10,66	-1,63	0,0028	0,0423	Cfh
Arhgap31	5,93	6,64	-1,63	0,0105	0,0945	Arhgap31
Cib1	5,49	6,2	-1,63	0,0004	0,0131	Cib1
Irf2bpl	4,81	5,52	-1,63	0,0081	0,0809	Irf2bpl
Tcp11l2	4,45	5,16	-1,64	0,0128	0,1070	Tcp11l2
Med21	2,01	2,72	-1,64	0,0281	0,1766	Med21
2810025M15Rik	4,54	5,25	-1,64	0,0047	0,0588	2810025M15Rik
Sft2d2	9,25	9,96	-1,64	0,0021	0,0346	Sft2d2
Ubxn2b	3,06	3,77	-1,64	0,0121	0,1035	Ubxn2b
Iffo1	8,43	9,14	-1,64	0,0023	0,0373	Iffo1
Tln2	5,49	6,21	-1,64	0,0003	0,0107	Tln2
Csnk1e	6,05	6,76	-1,64	0,0021	0,0353	Csnk1e
Mib2	8,27	8,99	-1,64	0,0088	0,0845	Mib2
Plxdc2	10,14	10,86	-1,64	0,0035	0,0489	Plxdc2
Neo1	3,09	3,81	-1,64	0,0067	0,0721	Neo1
Gm4943	1,67	2,39	-1,64	0,0162	0,1240	Gm4943
Hhat	2,5	3,22	-1,65	0,0327	0,1940	Hhat
Ikzf2	1,29	2,01	-1,65	0,0018	0,0319	Ikzf2
Prkcq	1,64	2,36	-1,65	0,0046	0,0578	Prkcq
9930021J03Rik	3,56	4,28	-1,65	0,0081	0,0810	9930021J03Rik
Zfyve9	3,08	3,8	-1,65	0,0026	0,0401	Zfyve9
D030028A08Rik	2,46	3,19	-1,65	0,0127	0,1064	D030028A08Rik
Mmgt1	4,47	5,19	-1,65	0,0043	0,0552	Mmgt1
Med12l	4,61	5,34	-1,65	0,0029	0,0430	Med12l
Snx6	6,02	6,75	-1,65	0,0174	0,1299	Snx6
Creb3l2	5,75	6,47	-1,65	0,0023	0,0366	Creb3l2
Osbpl11	6,87	7,6	-1,65	0,0003	0,0106	Osbpl11
Rab19	0,56	1,28	-1,66	0,0336	0,1967	Rab19
Rapgef5	8,29	9,02	-1,66	0,0001	0,0070	Rapgef5
Tfap4	3,88	4,61	-1,66	0,0117	0,1018	Tfap4
Tmem128	4,96	5,69	-1,66	0,0214	0,1479	Tmem128
Ephb3	3,52	4,25	-1,66	0,0004	0,0132	Ephb3
Arhgef40	6,38	7,11	-1,66	0,0097	0,0899	Arhgef40
Cc2d2a	0,99	1,72	-1,66	0,0237	0,1586	Cc2d2a
Smap2	8,85	9,59	-1,66	2,44E-05	0,0028	Smap2
Rhoq	6,48	7,22	-1,67	0,0026	0,0396	Rhoq
Arhgef18	4,31	5,05	-1,67	0,0001	0,0064	Arhgef18
Slc25a37	2,37	3,11	-1,67	0,0003	0,0106	Slc25a37
2610528A11Rik	2,78	3,52	-1,67	0,0026	0,0403	2610528A11Rik
Akirin2	7,37	8,11	-1,67	0,0030	0,0437	Akirin2
Otud7b	5,54	6,28	-1,67	0,0006	0,0167	Otud7b
Acy1	4,75	5,48	-1,67	0,0067	0,0722	Acy1
Nradd	4,14	4,88	-1,67	0,0021	0,0350	Nradd
Large	6,96	7,71	-1,67	1,77E-05	0,0024	Large
Klf12	6,05	6,79	-1,67	0,0013	0,0269	Klf12
Fkbp7	3,45	4,19	-1,67	0,0020	0,0343	Fkbp7
Btbd17	1	1,74	-1,67	0,0277	0,1747	Btbd17
Sppl3	6,98	7,72	-1,67	0,0139	0,1128	Sppl3
Arglu1	5,75	6,49	-1,67	0,0174	0,1304	Arglu1
Sipa1l1	4,97	5,71	-1,68	0,0102	0,0928	Sipa1l1
Ccng2	7,98	8,73	-1,68	6,84E-05	0,0049	Ccng2
Slamf1	3,36	4,11	-1,68	0,0018	0,0321	Slamf1
Rab39	5,69	6,44	-1,68	0,0004	0,0134	Rab39
Rbm41	3,43	4,18	-1,68	0,0075	0,0772	Rbm41
Ggps1	6,24	6,99	-1,68	0,0019	0,0334	Ggps1
4933412E12Rik	2,8	3,56	-1,68	0,0038	0,0508	4933412E12Rik
Bin2	8,16	8,91	-1,68	0,0012	0,0253	Bin2
Rpa2	3,47	4,22	-1,69	0,0086	0,0832	Rpa2
Kcnma1	4,12	4,88	-1,69	0,0086	0,0835	Kcnma1
Plxna4	5,01	5,77	-1,69	0,0010	0,0222	Plxna4
LOC108167662	0,21	0,97	-1,69	0,0018	0,0317	LOC108167662
Flnb	4,51	5,27	-1,69	0,0052	0,0619	Flnb
Angptl7	4,32	5,08	-1,7	0,0077	0,0781	Angptl7
LOC105246961	2,96	3,73	-1,7	0,0030	0,0437	LOC105246961
Plcl2	5,38	6,15	-1,7	0,0013	0,0265	Plcl2
Frat2	2,55	3,31	-1,7	0,0013	0,0262	Frat2
Zfp358	5,58	6,35	-1,7	0,0059	0,0670	Zfp358
Abcg2	4,65	5,42	-1,7	0,0001	0,0071	Abcg2
Fam212a	7,59	8,36	-1,7	0,0009	0,0213	Fam212a
Lbx2	0,66	1,43	-1,71	0,0026	0,0396	Lbx2
Zfp532	5,05	5,82	-1,71	0,0004	0,0125	Zfp532
Pik3r1	7,85	8,62	-1,71	0,0004	0,0134	Pik3r1
LOC108169124	0,97	1,74	-1,71	0,0095	0,0892	LOC108169124
Myl2	3,63	4,4	-1,71	0,0075	0,0774	Myl2
Shmt1	2,5	3,27	-1,71	0,0071	0,0750	Shmt1
Exog	4,38	5,16	-1,71	0,0022	0,0354	Exog
Galm	4,51	5,28	-1,71	0,0025	0,0395	Galm
Klrd1	0,21	0,98	-1,71	0,0204	0,1430	Klrd1
Ak6	1,34	2,11	-1,71	0,0087	0,0840	Ak6
Kctd12	6,6	7,38	-1,71	0,0004	0,0129	Kctd12
Evi5	4,64	5,42	-1,71	0,0013	0,0270	Evi5
Hmga2-ps1	6,46	7,23	-1,72	0,0018	0,0323	Hmga2-ps1
Golm1	9,47	10,25	-1,72	1,07E-06	0,0008	Golm1
Abl1	8,51	9,29	-1,72	0,0139	0,1124	Abl1
Acvr2b	5,27	6,06	-1,72	0,0029	0,0430	Acvr2b
Mpeg1	5,64	6,43	-1,72	0,0010	0,0222	Mpeg1
Epn2	4,65	5,43	-1,72	1,49E-05	0,0022	Epn2
Nrm	5,76	6,55	-1,72	6,56E-05	0,0047	Nrm
Gm36774	0,69	1,47	-1,72	0,0095	0,0886	Gm36774
Arap2	3,03	3,82	-1,73	0,0047	0,0588	Arap2
Frmd8	5,14	5,92	-1,73	0,0001	0,0069	Frmd8
Fhit	4,2	4,99	-1,73	0,0049	0,0594	Fhit
Bsn	3,84	4,63	-1,73	0,0254	0,1653	Bsn
Zfp652	6,35	7,14	-1,73	0,0105	0,0945	Zfp652
Msrb2	5,47	6,26	-1,73	0,0043	0,0550	Msrb2
Glrp1	1,91	2,7	-1,73	0,0306	0,1857	Glrp1
Prickle1	2,07	2,87	-1,73	0,0004	0,0131	Prickle1
Map4k4	6,88	7,67	-1,73	0,0008	0,0204	Map4k4
Asb2	6,9	7,7	-1,74	0,0002	0,0079	Asb2
Gm684	0,43	1,23	-1,74	0,0177	0,1317	Gm684
Idh2	6,42	7,21	-1,74	3,13E-06	0,0010	Idh2
Ddx26b	6,2	7	-1,74	0,0059	0,0672	Ddx26b
Cmtm6	9,15	9,95	-1,74	0,0017	0,0317	Cmtm6
Scarb1	5,56	6,36	-1,74	0,0014	0,0273	Scarb1
Gm16702	0,96	1,76	-1,74	0,0047	0,0583	Gm16702
Mylip	8,19	9	-1,75	0,0015	0,0293	Mylip
Klf15	0,21	1,01	-1,75	0,0029	0,0427	Klf15
Dennd4a	6,96	7,77	-1,75	0,0029	0,0426	Dennd4a
Tbc1d4	3,74	4,55	-1,75	0,0019	0,0330	Tbc1d4
Mettl7a1	4,83	5,64	-1,75	0,0053	0,0629	Mettl7a1
Zfp691	5,38	6,2	-1,76	0,0007	0,0176	Zfp691
Lactb2	3,11	3,93	-1,76	0,0012	0,0250	Lactb2
Uggt2	0,85	1,66	-1,76	0,0008	0,0192	Uggt2
Asap3	7,31	8,12	-1,76	0,0216	0,1487	Asap3
Naalad2	3,78	4,59	-1,76	0,0293	0,1815	Naalad2
Lrig3	4,01	4,82	-1,76	0,0026	0,0397	Lrig3
Plvap	2,64	3,46	-1,76	0,0008	0,0200	Plvap
Rab6b	5,75	6,57	-1,77	0,0002	0,0094	Rab6b
Prpsap2	6,37	7,19	-1,77	0,0001	0,0072	Prpsap2
Tspan9	4,68	5,5	-1,77	0,0007	0,0188	Tspan9
Olfr1034	0,11	0,93	-1,77	0,0093	0,0875	Olfr1034
Pafah1b1	3,36	4,18	-1,77	0,0292	0,1809	Pafah1b1
Dip2b	7,67	8,5	-1,77	0,0004	0,0126	Dip2b
Fam133b	3,67	4,5	-1,77	0,0182	0,1335	Fam133b
Mb21d2	0,81	1,63	-1,78	0,0083	0,0817	Mb21d2
Magi1	5,42	6,25	-1,78	0,0185	0,1353	Magi1
Fkbp14	3,21	4,04	-1,78	0,0198	0,1408	Fkbp14
Cds1	7,19	8,02	-1,78	0,0001	0,0073	Cds1
2700081O15Rik	3,56	4,4	-1,79	0,0023	0,0373	2700081O15Rik
Pdk1	3,22	4,06	-1,79	0,0107	0,0957	Pdk1
Ric3	4,28	5,12	-1,79	0,0033	0,0469	Ric3
Pbx1	3,3	4,15	-1,79	0,0075	0,0774	Pbx1
A230056P14Rik	1,66	2,5	-1,79	0,0036	0,0498	A230056P14Rik
Usp24	5,3	6,14	-1,79	0,0008	0,0199	Usp24
Maged2	2,99	3,83	-1,79	0,0040	0,0527	Maged2
B4galt4	7,07	7,92	-1,8	0,0001	0,0064	B4galt4
Rras2	3,96	4,81	-1,81	0,0082	0,0815	Rras2
Usp2	8,47	9,33	-1,81	0,0004	0,0132	Usp2
Sort1	6,55	7,4	-1,81	0,0107	0,0959	Sort1
Rbbp9	5,8	6,66	-1,81	4,79E-05	0,0039	Rbbp9
Fam131a	4,49	5,34	-1,81	0,0006	0,0170	Fam131a
Fam91a1	5,41	6,26	-1,81	0,0086	0,0833	Fam91a1
Calm2	8,94	9,79	-1,81	5,16E-05	0,0042	Calm2
Irf4	4,05	4,91	-1,81	1,97E-05	0,0026	Irf4
Rdh12	0,28	1,14	-1,82	0,0050	0,0608	Rdh12
Coro2a	5,4	6,26	-1,82	0,0007	0,0183	Coro2a
4930487H11Rik	3,09	3,95	-1,82	0,0163	0,1248	4930487H11Rik
Prkg1	0,46	1,33	-1,82	0,0234	0,1570	Prkg1
Kcnd1	7,05	7,91	-1,83	0,0024	0,0382	Kcnd1
Asb10	3,89	4,76	-1,83	0,0021	0,0348	Asb10
Clec4a4	0,87	1,74	-1,83	0,0230	0,1552	Clec4a4
Vprbp	4,36	5,24	-1,83	0,0004	0,0137	Vprbp
Casp3	5,45	6,33	-1,83	0,0007	0,0189	Casp3
Tspan13	5,67	6,55	-1,83	0,0027	0,0412	Tspan13
Lactb	4,59	5,47	-1,84	0,0109	0,0970	Lactb
Mlxipl	8,26	9,15	-1,84	0,0030	0,0434	Mlxipl
Efcab6	0,28	1,16	-1,84	0,0052	0,0619	Efcab6
Klk8	5,25	6,13	-1,84	0,0061	0,0682	Klk8
Gm572	0,98	1,86	-1,85	0,0288	0,1793	Gm572
Mir17hg	2,71	3,6	-1,85	0,0009	0,0207	Mir17hg
Rilpl1	6,53	7,42	-1,85	0,0034	0,0471	Rilpl1
Gm7694	3,51	4,39	-1,85	0,0101	0,0924	Gm7694
Naa35	5,87	6,75	-1,85	0,0005	0,0151	Naa35
Mmp23	3	3,88	-1,85	0,0017	0,0306	Mmp23
Dapp1	6,42	7,31	-1,85	0,0005	0,0156	Dapp1
Erf	7,81	8,69	-1,85	0,0008	0,0194	Erf
Gspt1	6,83	7,72	-1,85	0,0034	0,0475	Gspt1
Sh2d5	1,6	2,49	-1,85	0,0064	0,0705	Sh2d5
Cdk5r1	7,56	8,45	-1,85	0,0002	0,0091	Cdk5r1
Vangl2	4,05	4,94	-1,85	0,0026	0,0404	Vangl2
Stxbp5	3,73	4,62	-1,86	0,0006	0,0162	Stxbp5
Rec114	1,19	2,08	-1,86	0,0168	0,1276	Rec114
Kcp	1,05	1,94	-1,86	0,0099	0,0916	Kcp
Ltb	1,91	2,81	-1,87	0,0005	0,0142	Ltb
Ptprm	6,28	7,18	-1,87	0,0007	0,0179	Ptprm
Fam171a1	0,79	1,69	-1,87	0,0021	0,0354	Fam171a1
Cry1	1,4	2,3	-1,87	0,0078	0,0792	Cry1
Maml3	5,75	6,65	-1,87	0,0066	0,0718	Maml3
Thrsp	5,36	6,26	-1,87	0,0001	0,0071	Thrsp
Gpr34	9,41	10,31	-1,87	0,0006	0,0174	Gpr34
Ablim1	3,79	4,69	-1,87	0,0105	0,0950	Ablim1
Eef2k	6,52	7,42	-1,87	0,0017	0,0312	Eef2k
Klhl7	4,64	5,55	-1,88	6,85E-05	0,0049	Klhl7
Sox4	6,52	7,42	-1,88	0,0080	0,0802	Sox4
Srl	3,84	4,75	-1,88	0,0012	0,0250	Srl
Dock9	6,35	7,26	-1,88	0,0006	0,0161	Dock9
Cbfa2t3	5,37	6,28	-1,88	0,0014	0,0282	Cbfa2t3
Marveld2	2,46	3,37	-1,88	0,0026	0,0405	Marveld2
Rfx3	3,51	4,42	-1,88	1,71E-05	0,0023	Rfx3
Chst7	5,62	6,53	-1,88	0,0004	0,0135	Chst7
Eepd1	5,25	6,17	-1,88	0,0031	0,0451	Eepd1
Siglech	9,7	10,61	-1,88	5,94E-05	0,0044	Siglech
Lemd3	4,45	5,36	-1,89	0,0058	0,0667	Lemd3
Hspb3	4,66	5,58	-1,89	0,0005	0,0151	Hspb3
Cnn2	3,93	4,85	-1,89	0,0004	0,0134	Cnn2
Thnsl2	1,67	2,59	-1,89	0,0325	0,1934	Thnsl2
LOC108167986	0,11	1,03	-1,89	0,0032	0,0457	LOC108167986
Afm	0,93	1,85	-1,9	0,0004	0,0134	Afm
Ccdc85c	3,93	4,85	-1,9	0,0009	0,0215	Ccdc85c
Add3	6,38	7,31	-1,9	0,0048	0,0589	Add3
Cd101	3,23	4,15	-1,9	0,0203	0,1429	Cd101
Nr3c2	3,05	3,98	-1,9	0,0016	0,0305	Nr3c2
Nfia	6,33	7,26	-1,9	1,71E-07	0,0005	Nfia
Atmin	4,22	5,15	-1,91	0,0002	0,0096	Atmin
Gem	1,34	2,28	-1,91	0,0028	0,0418	Gem
Zfp69	3,28	4,22	-1,91	0,0007	0,0180	Zfp69
Khk	5,65	6,59	-1,91	0,0001	0,0064	Khk
Rhob	10,12	11,06	-1,91	0,0001	0,0069	Rhob
Vopp1	1,35	2,29	-1,92	0,0002	0,0080	Vopp1
Rbm38	5,97	6,91	-1,92	0,0006	0,0176	Rbm38
Tead3	4,03	4,97	-1,92	0,0001	0,0070	Tead3
Tle3	6,89	7,83	-1,92	1,23E-06	0,0008	Tle3
Bhlhb9	2,42	3,36	-1,92	0,0079	0,0798	Bhlhb9
Cxxc5	8,1	9,05	-1,92	5,66E-05	0,0043	Cxxc5
Itgb3	5,72	6,67	-1,93	0,0027	0,0414	Itgb3
Atp6v0a2	6,83	7,78	-1,94	0,0022	0,0355	Atp6v0a2
Edem1	7,35	8,31	-1,94	0,0004	0,0131	Edem1
Pde4d	2,29	3,25	-1,94	0,0006	0,0168	Pde4d
Zfp454	0,45	1,41	-1,94	0,0331	0,1950	Zfp454
Narf	5,28	6,23	-1,94	0,0071	0,0750	Narf
Zcwpw1	2,43	3,39	-1,94	0,0019	0,0334	Zcwpw1
Pik3r5	7,2	8,16	-1,95	0,0009	0,0205	Pik3r5
Efnb1	3,73	4,69	-1,95	0,0002	0,0077	Efnb1
Gm36529	0,82	1,78	-1,95	0,0256	0,1658	Gm36529
Ceacam1	6,31	7,28	-1,95	0,0158	0,1218	Ceacam1
Ptgfrn	3,52	4,48	-1,95	0,0237	0,1587	Ptgfrn
Fscn1	7,54	8,51	-1,96	0,0002	0,0099	Fscn1
Pxk	5,59	6,56	-1,96	0,0003	0,0116	Pxk
Sema4b	3,89	4,86	-1,96	0,0005	0,0146	Sema4b
Vis1	2,79	3,76	-1,96	0,0003	0,0117	Vis1
Bmp1	3,43	4,41	-1,97	0,0011	0,0242	Bmp1
Qprt	1,59	2,57	-1,98	0,0005	0,0144	Qprt
Grrp1	0,15	1,14	-1,98	0,0214	0,1477	Grrp1
Pim2	3,9	4,88	-1,98	0,0004	0,0126	Pim2
Zfp57	0,56	1,54	-1,98	0,0025	0,0395	Zfp57
Sall3	7,4	8,39	-1,98	9,08E-05	0,0058	Sall3
Rab3ip	3,56	4,54	-1,98	2,36E-07	0,0005	Rab3ip
Pfn1	9,74	10,73	-1,98	8,79E-05	0,0057	Pfn1
Gm30794	1,2	2,19	-1,98	0,0132	0,1089	Gm30794
Ccdc8	2,71	3,71	-1,99	0,0044	0,0556	Ccdc8
Ldhb	6,52	7,51	-1,99	0,0003	0,0121	Ldhb
Tcaf1	1,56	2,56	-1,99	0,0073	0,0759	Tcaf1
Parp16	2,25	3,24	-1,99	0,0011	0,0237	Parp16
Tspan18	3,97	4,97	-2	0,0036	0,0497	Tspan18
Rab27a	6,44	7,44	-2	0,0002	0,0082	Rab27a
Nav2	6,28	7,29	-2	0,0005	0,0144	Nav2
Fchsd2	6,84	7,84	-2	9,02E-06	0,0017	Fchsd2
Slc40a1	6,13	7,14	-2	8,65E-06	0,0017	Slc40a1
Neurl1a	3,93	4,93	-2,01	0,0103	0,0936	Neurl1a
Zbtb18	5,68	6,69	-2,01	3,15E-05	0,0031	Zbtb18
Ddit4	5,3	6,31	-2,02	0,0126	0,1060	Ddit4
S100a10	1,13	2,14	-2,02	0,0099	0,0911	S100a10
Ccr6	2,9	3,92	-2,03	0,0004	0,0141	Ccr6
St3gal2	5,86	6,88	-2,03	0,0066	0,0718	St3gal2
Gm32645	3,08	4,11	-2,03	0,0329	0,1943	Gm32645
Prkce	4,35	5,37	-2,03	6,78E-05	0,0049	Prkce
Stradb	2,73	3,76	-2,03	0,0058	0,0667	Stradb
Ocln	2,03	3,05	-2,03	0,0042	0,0544	Ocln
Adamtsl2	2,72	3,74	-2,04	0,0024	0,0387	Adamtsl2
Iqch	0,11	1,14	-2,04	0,0028	0,0425	Iqch
Slc24a3	5,14	6,17	-2,04	0,0055	0,0643	Slc24a3
Mpv17l	2,75	3,78	-2,04	0,0264	0,1690	Mpv17l
Mras	5	6,04	-2,05	0,0038	0,0511	Mras
Tmem144	5,18	6,21	-2,05	2,47E-05	0,0028	Tmem144
Nid2	5,03	6,07	-2,05	0,0012	0,0251	Nid2
Agmo	6,44	7,48	-2,05	2,48E-05	0,0028	Agmo
Peg10	0,72	1,76	-2,05	0,0097	0,0899	Peg10
Tmem263	0,31	1,35	-2,06	0,0012	0,0255	Tmem263
Dmrtb1	1,49	2,54	-2,06	0,0183	0,1344	Dmrtb1
Ccdc62	2,03	3,07	-2,06	0,0275	0,1738	Ccdc62
Eno3	2,95	4	-2,07	0,0095	0,0889	Eno3
Adcy6	3,12	4,17	-2,07	0,0009	0,0206	Adcy6
LOC102632541	0	1,05	-2,07	0,0004	0,0137	LOC102632541
Plpp1	6,08	7,13	-2,07	0,0050	0,0602	Plpp1
Slc12a2	7,44	8,49	-2,07	3,50E-07	0,0005	Slc12a2
Afap1l1	6,14	7,19	-2,07	0,0022	0,0361	Afap1l1
LOC108167732	5,07	6,13	-2,07	0,0296	0,1825	LOC108167732
Spin4	0,32	1,38	-2,08	0,0290	0,1800	Spin4
Ppp1r9a	6,41	7,46	-2,08	0,0001	0,0072	Ppp1r9a
Tspan7	7,23	8,29	-2,08	2,76E-05	0,0030	Tspan7
Dclk2	3,32	4,38	-2,08	0,0002	0,0082	Dclk2
Slc38a9	3,11	4,17	-2,08	0,0311	0,1878	Slc38a9
Slc5a5	0,67	1,74	-2,09	0,0023	0,0376	Slc5a5
Serpine2	8,91	9,98	-2,09	6,51E-05	0,0047	Serpine2
Dnaja4	2,9	3,97	-2,1	0,0031	0,0449	Dnaja4
Ppp1r26	1,58	2,66	-2,11	0,0138	0,1122	Ppp1r26
5730435O14Rik	0,78	1,86	-2,11	0,0007	0,0178	5730435O14Rik
Whrn	7,79	8,87	-2,11	0,0006	0,0162	Whrn
St3gal5	6,88	7,95	-2,11	3,00E-05	0,0030	St3gal5
Siglecg	0,89	1,98	-2,12	0,0019	0,0334	Siglecg
Layn	3,18	4,26	-2,12	0,0013	0,0263	Layn
Sparc	11,32	12,4	-2,12	0,0030	0,0433	Sparc
Adra2a	0	1,08	-2,12	0,0002	0,0087	Adra2a
Cnrip1	3,58	4,67	-2,13	0,0004	0,0136	Cnrip1
Asph	8,53	9,62	-2,13	0,0003	0,0103	Asph
Gadl1	1,5	2,59	-2,13	3,47E-05	0,0033	Gadl1
Dnajc28	1,65	2,74	-2,13	0,0014	0,0276	Dnajc28
Apob	0,36	1,46	-2,14	0,0007	0,0182	Apob
Eng	7,9	9	-2,14	0,0003	0,0124	Eng
Lrrc1	1,29	2,39	-2,14	0,0108	0,0959	Lrrc1
Zfp354b	2,19	3,29	-2,15	0,0032	0,0456	Zfp354b
AI429214	2,04	3,15	-2,15	0,0084	0,0826	AI429214
Bnc2	0,84	1,95	-2,15	0,0019	0,0329	Bnc2
Bmpr1a	3,73	4,84	-2,15	4,09E-05	0,0035	Bmpr1a
Cdkn1c	3,2	4,3	-2,15	0,0014	0,0282	Cdkn1c
Cmya5	1,13	2,24	-2,15	0,0016	0,0299	Cmya5
Itgae	2,02	3,13	-2,16	2,50E-05	0,0028	Itgae
Ctnnd2	2,96	4,07	-2,17	0,0058	0,0668	Ctnnd2
Prox2	3,03	4,14	-2,17	0,0006	0,0170	Prox2
LOC108168194	0,11	1,23	-2,17	0,0003	0,0121	LOC108168194
Nos1ap	4,86	5,98	-2,17	0,0003	0,0124	Nos1ap
Myadml2	3,13	4,25	-2,17	0,0002	0,0083	Myadml2
Jup	6,11	7,23	-2,18	0,0002	0,0080	Jup
Smim1	1,73	2,85	-2,18	0,0015	0,0289	Smim1
Sdk1	4,91	6,04	-2,18	0,0019	0,0333	Sdk1
Gmpr	4,61	5,74	-2,19	0,0002	0,0085	Gmpr
Tmem64	6,2	7,34	-2,19	0,0002	0,0081	Tmem64
Mrc2	6,1	7,24	-2,2	0,0007	0,0186	Mrc2
Nynrin	3,27	4,41	-2,2	0,0003	0,0103	Nynrin
Snta1	4,26	5,4	-2,2	0,0013	0,0262	Snta1
Zfp697	2,99	4,13	-2,2	0,0089	0,0849	Zfp697
Mical3	4,43	5,58	-2,21	0,0003	0,0119	Mical3
Ccdc149	1,14	2,29	-2,22	0,0005	0,0156	Ccdc149
Tpbgl	5,52	6,67	-2,22	0,0020	0,0345	Tpbgl
Zfp641	1,62	2,77	-2,22	0,0100	0,0916	Zfp641
Lrrc75a	5,49	6,64	-2,22	0,0004	0,0134	Lrrc75a
Ptpn14	0,09	1,24	-2,22	0,0038	0,0509	Ptpn14
Plcg1	5,43	6,59	-2,23	0,0001	0,0072	Plcg1
Snn	7,63	8,79	-2,23	0,0003	0,0105	Snn
Abcb4	4,72	5,88	-2,23	0,0002	0,0099	Abcb4
Ncaph	1,36	2,52	-2,23	8,74E-05	0,0057	Ncaph
Nudt12	0,91	2,07	-2,23	0,0045	0,0571	Nudt12
Nhsl2	0,45	1,61	-2,24	0,0171	0,1289	Nhsl2
Postn	1,12	2,29	-2,24	0,0019	0,0334	Postn
Ddah2	4,76	5,93	-2,26	0,0006	0,0162	Ddah2
Zfp354c	2,79	3,97	-2,26	0,0011	0,0242	Zfp354c
Kctd12b	2,66	3,84	-2,26	0,0202	0,1421	Kctd12b
Bahcc1	3,68	4,86	-2,28	0,0026	0,0401	Bahcc1
Setbp1	1,33	2,52	-2,28	0,0015	0,0287	Setbp1
Arvcf	6,21	7,4	-2,28	7,41E-05	0,0051	Arvcf
Cecr2	0,1	1,29	-2,28	0,0158	0,1218	Cecr2
Rab34	4,48	5,67	-2,28	0,0002	0,0078	Rab34
Utp6	2,51	3,71	-2,28	0,0062	0,0689	Utp6
Nat1	0,59	1,79	-2,29	0,0007	0,0189	Nat1
Armcx2	3,79	4,98	-2,29	0,0001	0,0070	Armcx2
Zfp37	1,86	3,06	-2,3	0,0048	0,0593	Zfp37
Arsg	4,73	5,93	-2,3	4,08E-05	0,0035	Arsg
Ets1	6,78	7,98	-2,3	8,82E-05	0,0057	Ets1
Ttc9	3,09	4,3	-2,3	0,0008	0,0199	Ttc9
Numb	8,77	9,98	-2,32	2,63E-06	0,0009	Numb
Zc3h12b	2	3,21	-2,32	0,0009	0,0211	Zc3h12b
Adcy8	1,06	2,28	-2,32	0,0075	0,0774	Adcy8
Picalm	6,86	8,07	-2,32	0,0050	0,0601	Picalm
Sgce	6,07	7,29	-2,32	0,0005	0,0144	Sgce
Col27a1	5,81	7,03	-2,33	0,0027	0,0413	Col27a1
Sall1	6,96	8,18	-2,33	0,0012	0,0258	Sall1
D7Ertd443e	0,83	2,05	-2,34	0,0180	0,1331	D7Ertd443e
Dll1	1,62	2,85	-2,35	0,0113	0,0989	Dll1
Mpi	5,86	7,1	-2,35	0,0001	0,0075	Mpi
Adgra3	3,45	4,68	-2,36	0,0004	0,0127	Adgra3
Palld	1,68	2,92	-2,36	0,0005	0,0157	Palld
Arhgef25	1,52	2,77	-2,37	0,0203	0,1430	Arhgef25
Atp2c1	7,05	8,3	-2,37	0,0002	0,0077	Atp2c1
Gramd4	4,04	5,29	-2,38	0,0010	0,0231	Gramd4
Cdca7	4,66	5,91	-2,38	0,0003	0,0110	Cdca7
Fam13a	2,61	3,87	-2,38	0,0003	0,0124	Fam13a
Icos	1,58	2,85	-2,4	0,0036	0,0498	Icos
Gab1	4,89	6,16	-2,4	0,0009	0,0207	Gab1
Tet1	2,73	4	-2,41	5,16E-05	0,0042	Tet1
Gp9	3,67	4,95	-2,43	0,0002	0,0076	Gp9
Scube1	2,25	3,54	-2,43	0,0003	0,0111	Scube1
Cass4	5,15	6,45	-2,45	0,0001	0,0067	Cass4
Engase	5,52	6,81	-2,45	0,0001	0,0071	Engase
Tiam1	4,69	5,99	-2,45	9,62E-05	0,0060	Tiam1
Lrrc39	2,86	4,16	-2,46	0,0001	0,0071	Lrrc39
Zfp354a	2,92	4,23	-2,48	0,0015	0,0291	Zfp354a
Bend5	1,4	2,71	-2,49	0,0047	0,0587	Bend5
Atp8a2	7,96	9,27	-2,49	0,0005	0,0156	Atp8a2
Nav3	7,07	8,39	-2,49	7,79E-06	0,0017	Nav3
LOC108167997	0,91	2,24	-2,52	0,0106	0,0952	LOC108167997
Unc5cl	1,92	3,26	-2,52	0,0025	0,0389	Unc5cl
Eid2	2,21	3,54	-2,52	0,0058	0,0667	Eid2
Fut10	3,52	4,85	-2,52	0,0009	0,0211	Fut10
Adgrg1	8,9	10,24	-2,53	8,01E-05	0,0053	Adgrg1
Arhgap32	2,39	3,74	-2,56	0,0013	0,0270	Arhgap32
Rab4a	1,26	2,61	-2,56	0,0004	0,0133	Rab4a
Atp8b1	2,72	4,08	-2,57	0,0008	0,0204	Atp8b1
Slc1a3	5,57	6,93	-2,57	0,0007	0,0190	Slc1a3
Gm29927	1,06	2,43	-2,58	0,0117	0,1017	Gm29927
Nrarp	4,53	5,9	-2,59	2,50E-05	0,0028	Nrarp
Cx3cr1	10,3	11,68	-2,6	0,0003	0,0108	Cx3cr1
Ackr3	0,65	2,03	-2,6	0,0037	0,0502	Ackr3
Bcl9l	6,79	8,17	-2,61	3,97E-05	0,0035	Bcl9l
Cdc42ep1	0,31	1,69	-2,61	0,0034	0,0481	Cdc42ep1
Dpy19l3	2,23	3,62	-2,62	0,0003	0,0117	Dpy19l3
Gimap9	1,03	2,42	-2,62	2,81E-05	0,0030	Gimap9
Clec4a3	3,58	4,98	-2,64	0,0084	0,0826	Clec4a3
Efnb2	1,8	3,2	-2,64	0,0011	0,0243	Efnb2
Prkca	4,76	6,16	-2,65	8,27E-05	0,0054	Prkca
Duoxa1	2,23	3,64	-2,65	0,0033	0,0463	Duoxa1
Pnma2	0,43	1,84	-2,66	0,0008	0,0195	Pnma2
Jam2	5,81	7,22	-2,66	0,0002	0,0077	Jam2
Ecscr	7,58	9	-2,69	1,43E-05	0,0022	Ecscr
Tppp	5,31	6,74	-2,7	0,0001	0,0070	Tppp
Sema4g	7,28	8,72	-2,71	2,51E-05	0,0028	Sema4g
Actn1	4,46	5,9	-2,71	0,0003	0,0116	Actn1
Casc4	1,09	2,53	-2,72	0,0004	0,0138	Casc4
Stk26	0,7	2,14	-2,72	0,0065	0,0707	Stk26
Igf1r	4,61	6,06	-2,73	4,17E-05	0,0036	Igf1r
Ccnjl	0,3	1,76	-2,76	0,0076	0,0781	Ccnjl
Nbl1	2,06	3,53	-2,76	0,0002	0,0082	Nbl1
Jam3	3,84	5,31	-2,76	1,09E-05	0,0018	Jam3
Gm30789	3,26	4,73	-2,77	0,0016	0,0301	Gm30789
Gm3134	4	5,47	-2,77	2,90E-05	0,0030	Gm3134
Slc2a5	6,46	7,93	-2,78	0,0007	0,0180	Slc2a5
Dlc1	1,09	2,57	-2,79	0,0003	0,0121	Dlc1
Gabbr1	5,39	6,88	-2,8	0,0002	0,0102	Gabbr1
Hsf2bp	2,67	4,16	-2,8	0,0001	0,0064	Hsf2bp
Lamb2	3,8	5,28	-2,8	3,84E-05	0,0034	Lamb2
Ppm1e	0,86	2,34	-2,8	0,0178	0,1319	Ppm1e
Kcnk12	3,46	4,95	-2,82	0,0002	0,0099	Kcnk12
Npl	5,29	6,79	-2,84	2,30E-06	0,0009	Npl
Nova1	1,84	3,36	-2,88	0,0005	0,0155	Nova1
Tgfa	5,22	6,75	-2,88	0,0002	0,0098	Tgfa
Fgf11	3,48	5,02	-2,89	0,0015	0,0295	Fgf11
Gm15880	0,47	2,01	-2,91	0,0009	0,0205	Gm15880
Lgi4	3,28	4,84	-2,96	0,0025	0,0389	Lgi4
Elavl4	2,55	4,12	-2,96	0,0026	0,0401	Elavl4
Nrep	2,52	4,09	-2,97	0,0034	0,0479	Nrep
P3h2	6,88	8,45	-2,98	1,14E-05	0,0019	P3h2
Prox1	2,91	4,48	-2,98	0,0007	0,0189	Prox1
Rtn4rl1	7,16	8,74	-2,98	0,0001	0,0065	Rtn4rl1
Ccl9	6,66	8,24	-2,99	0,0004	0,0137	Ccl9
Hnmt	3,7	5,28	-2,99	4,06E-05	0,0035	Hnmt
Ncs1	2,64	4,22	-2,99	0,0001	0,0070	Ncs1
Mycl	4,77	6,36	-3	0,0005	0,0144	Mycl
Plcl1	5,42	7,01	-3,01	0,0003	0,0118	Plcl1
Adamts16	4,09	5,7	-3,05	0,0004	0,0132	Adamts16
Yes1	2,6	4,21	-3,05	0,0003	0,0112	Yes1
Kng2	0,9	2,51	-3,06	9,10E-05	0,0058	Kng2
Tbx19	0,81	2,43	-3,07	0,0021	0,0347	Tbx19
Gprasp2	0,23	1,85	-3,09	0,0084	0,0825	Gprasp2
Satb1	2,61	4,24	-3,09	0,0002	0,0100	Satb1
Myo6	2,81	4,45	-3,12	0,0029	0,0430	Myo6
Gm36365	6,8	8,44	-3,12	4,02E-06	0,0011	Gm36365
Mmp15	2,45	4,1	-3,13	0,0006	0,0162	Mmp15
Gpd1	3,56	5,23	-3,17	0,0006	0,0172	Gpd1
Gimap1	1,96	3,63	-3,18	4,66E-05	0,0039	Gimap1
Vangl1	1,33	3,02	-3,23	0,0070	0,0741	Vangl1
Thsd1	1,83	3,53	-3,24	1,41E-05	0,0022	Thsd1
Farp1	2,91	4,61	-3,26	9,22E-05	0,0059	Farp1
Zfp827	2,68	4,39	-3,27	0,0007	0,0185	Zfp827
Tmem204	4,35	6,06	-3,28	0,0004	0,0126	Tmem204
Slc36a2	1	2,72	-3,31	0,0062	0,0693	Slc36a2
Apobec2	0,12	1,89	-3,43	9,70E-06	0,0018	Apobec2
Gimap6	3,01	4,79	-3,43	0,0001	0,0065	Gimap6
Klhl3	3,85	5,64	-3,45	5,50E-05	0,0043	Klhl3
Perp	0,89	2,69	-3,46	0,0004	0,0132	Perp
Mgll	3,27	5,06	-3,46	4,77E-06	0,0012	Mgll
Gm10790	5,39	7,19	-3,49	3,52E-06	0,0010	Gm10790
Slc16a9	0,5	2,31	-3,51	0,0077	0,0782	Slc16a9
Mmp28	0,77	2,61	-3,57	0,0001	0,0073	Mmp28
Cux2	2,38	4,24	-3,64	0,0003	0,0116	Cux2
Klhl38	2,58	4,46	-3,67	0,0002	0,0080	Klhl38
Tmc7	5,21	7,12	-3,76	1,60E-05	0,0022	Tmc7
Slc39a12	2,73	4,64	-3,76	1,07E-05	0,0018	Slc39a12
Zswim5	1,22	3,17	-3,87	0,0017	0,0310	Zswim5
Upk1b	5,99	7,95	-3,9	0,0001	0,0075	Upk1b
Chst8	4,41	6,37	-3,9	0,0005	0,0147	Chst8
Khdrbs3	2,05	4,05	-4	0,0005	0,0159	Khdrbs3
Crybb1	5,94	7,95	-4,04	5,51E-05	0,0043	Crybb1
Ccdc162	3,23	5,26	-4,08	0,0003	0,0119	Ccdc162
Pard3b	2,58	4,62	-4,11	0,0009	0,0208	Pard3b
Slc43a1	1,15	3,22	-4,22	0,0004	0,0132	Slc43a1
Rgs7bp	2,68	4,81	-4,36	2,01E-05	0,0026	Rgs7bp
Igf2bp2	2,11	4,27	-4,47	0,0001	0,0071	Igf2bp2
Dusp27	2,72	4,88	-4,49	3,78E-05	0,0034	Dusp27
Ptger3	0,44	2,63	-4,55	2,29E-05	0,0027	Ptger3
Csmd3	3,97	6,18	-4,61	0,0005	0,0151	Csmd3
Cd79b	3,52	5,72	-4,62	6,52E-06	0,0015	Cd79b
LOC108168886	3,6	5,83	-4,69	7,97E-06	0,0017	LOC108168886
Eva1a	2,37	4,61	-4,7	0,0002	0,0082	Eva1a
Ppm1l	4,36	6,59	-4,7	9,05E-06	0,0017	Ppm1l
Tmem44	5,34	7,57	-4,71	0,0001	0,0065	Tmem44
Lypd6	1,18	3,43	-4,76	3,13E-06	0,0010	Lypd6
Mlph	5,28	7,55	-4,81	5,82E-05	0,0044	Mlph
Cdh23	3,92	6,21	-4,92	1,35E-06	0,0008	Cdh23
[truncated: 16 more rows]

## Sheet: Engulfment vs Pfn1 DE's
ID	flfl cre+ Avg (log2)	flfl Avg (log2)	Fold Change	P-val	FDR P-val	Gene Symbol	Description			Engulfment vs Pfn1 DE's			By Fold Change
Ifi203	6,46	0,37	67,88	3,45E-08	0,0003	Ifi203				Tmem8			Top 5 Upregulated	Sample Signals (log2)
Pf4	7,06	1,71	40,97	4,69E-08	0,0003	Pf4				H2-Ab1				fl/fl	fl/fl	fl/fl	fl/fl Cre+	fl/fl Cre+	fl/fl Cre+
Ctse	5,92	0,86	33,4	2,12E-08	0,0003	Ctse				Axl			Ms4a7	0,37	0,37	0,52	7,14	7,35	6,92
Clec2d	8,45	6,82	3,11	7,07E-08	0,0003	Clec2d				Fcna			Cybb	1,78	1,58	2,87	8,46	8,25	7,97
Sirpb1b	3,65	0	12,54	9,08E-08	0,0004	Sirpb1b				Pf4			Apoe	4,67	4,63	4,55	11,1	11,07	11,05
Tlr8	7,2	0,11	136,45	2,84E-07	0,0005	Tlr8				Ms4a7			Siglec1	2,75	2,34	3,57	8,37	8,41	8,56
Ms4a4a	7,37	0,31	133,68	2,26E-07	0,0005	Ms4a4a				F13a1			H2-Eb1	2,11	3,27	3,06	8,75	8,67	8,48
Clec12a	7,35	0,55	111,83	3,58E-07	0,0005	Clec12a				Ms4a6c
Ms4a7	7,14	0,37	108,8	2,44E-07	0,0005	Ms4a7				Cybb			Top 5 Downregulated	Sample Signals (log2)
Cmah	5,4	0,21	36,5	1,68E-07	0,0005	Cmah				Anxa2				fl/fl	fl/fl	fl/fl	fl/fl Cre+	fl/fl Cre+	fl/fl Cre+
Vnn3	3,69	0	12,88	3,08E-07	0,0005	Vnn3				Folr2			Cecr2	1,54	0,6	1,31	0,19	0	0,1
Mmp14	7,69	6,14	2,93	2,47E-07	0,0005	Mmp14				Pilrb2
Nfia	6,33	7,26	-1,9	1,71E-07	0,0005	Nfia				Cd163
Rab3ip	3,56	4,54	-1,98	2,36E-07	0,0005	Rab3ip				Msr1			By FDR
Slc12a2	7,44	8,49	-2,07	3,50E-07	0,0005	Slc12a2				Lrp6			Top 10	Sample Signals (log2)
Runx3	6,33	0,13	73,67	4,18E-07	0,0006	Runx3				Apoe				fl/fl 1	fl/fl 2	fl/fl	fl/fl Cre+	fl/fl Cre+	fl/fl Cre+
Mndal	6,21	0,29	60,7	4,78E-07	0,0006	Mndal				Stap1			Pf4	1,72	1,61	1,79	7,05	6,99	7,17
Trps1	6,21	2,04	18,04	4,22E-07	0,0006	Trps1				Cd74			Ms4a7	0,37	0,37	0,52	7,14	7,35	6,92
Tmem221	7,01	3,38	12,39	5,31E-07	0,0006	Tmem221				Lrrc4b			Cd93	0,29	0	0	4,66	4,5	4,54
Gdf3	7,3	0,11	145,95	8,63E-07	0,0007	Gdf3				Mrc1			Lyz2	8,35	8,74	8,39	12,73	12,82	12,78
Klra2	6,36	0,18	72,36	6,32E-07	0,0007	Klra2				Atp10a			Stap1	0,2	0,2	0	3,87	4,2	4,07
Plbd1	6,2	0,27	60,71	9,12E-07	0,0007	Plbd1				H2-Eb1			Mrc1	4,18	3,83	4,31	8,77	8,55	8,68
Cp	5,3	0,67	24,75	9,15E-07	0,0007	Cp				H2-Aa			Cd74	5,61	6,14	6,35	10,83	10,89	10,82
Cd93	4,55	0	23,42	5,78E-07	0,0007	Cd93				Ccr1			Ccr1	3,8	3,2	3,59	7,45	7,37	7,51
Jag1	5,35	1,03	20,01	8,26E-07	0,0007	Jag1				Cecr2			Tmem8	2,87	2,8	2,95	4,94	5,11	4,96
Cpne2	5,65	1,73	15,17	9,47E-07	0,0007	Cpne2				Lyz2			Msr1	0	0	0	2,68	2,34	2,21
BC064078	5,15	1,89	9,6	8,28E-07	0,0007	BC064078				Siglec1
Gm33058	2,98	0,1	7,37	9,27E-07	0,0007	Gm33058				Cd93
Pde7b	2,65	0,1	5,85	7,59E-07	0,0007	Pde7b
Stom	7,22	5,1	4,35	6,28E-07	0,0007	Stom
Sdc4	6,91	5,33	2,99	7,89E-07	0,0007	Sdc4
Mcoln2	0,64	0	1,56	7,67E-07	0,0007	Mcoln2
Serpinb8	5,67	0,11	47,2	1,50E-06	0,0008	Serpinb8
Ptger4	6,8	1,66	35,19	1,98E-06	0,0008	Ptger4
Sorbs3	6,85	1,75	34,26	1,29E-06	0,0008	Sorbs3
Cd36	5,41	0,34	33,73	1,40E-06	0,0008	Cd36
Lyz2	12,77	8,37	21,17	1,54E-06	0,0008	Lyz2
Lgals1	5,98	2,03	15,45	1,28E-06	0,0008	Lgals1
Stap1	4,06	0,2	14,5	1,49E-06	0,0008	Stap1
Dram1	4,54	0,79	13,44	1,91E-06	0,0008	Dram1
Qpct	4,54	1,07	11,05	1,74E-06	0,0008	Qpct
Sh3pxd2b	4,67	1,27	10,54	1,87E-06	0,0008	Sh3pxd2b
Gsn	5,36	2,37	7,94	1,83E-06	0,0008	Gsn
Kcnn4	6,76	3,8	7,78	1,41E-06	0,0008	Kcnn4
Pstpip1	5,66	2,9	6,78	2,12E-06	0,0008	Pstpip1
Ctla2b	5,68	3,58	4,3	1,85E-06	0,0008	Ctla2b
Tmem82	4,95	2,88	4,22	2,06E-06	0,0008	Tmem82
Acvrl1	7,06	5,39	3,17	2,04E-06	0,0008	Acvrl1
Pigz	5,04	3,41	3,1	1,61E-06	0,0008	Pigz
Slamf9	7,88	6,4	2,78	1,57E-06	0,0008	Slamf9
Csrp1	4,37	2,94	2,69	1,10E-06	0,0008	Csrp1
Gpr183	7,18	6,1	2,11	1,76E-06	0,0008	Gpr183
Coro7	7,49	6,44	2,07	1,18E-06	0,0008	Coro7
Sap30	4,41	3,36	2,07	1,39E-06	0,0008	Sap30
Akr1b10	5,18	5,78	-1,51	2,12E-06	0,0008	Akr1b10
Golm1	9,47	10,25	-1,72	1,07E-06	0,0008	Golm1
Tle3	6,89	7,83	-1,92	1,23E-06	0,0008	Tle3
Cdh23	3,92	6,21	-4,92	1,35E-06	0,0008	Cdh23
Gpr165	2,36	5,93	-11,88	1,57E-06	0,0008	Gpr165
Cyp4f18	6,44	0,76	51,04	2,41E-06	0,0009	Cyp4f18
Myof	5,42	0,26	35,7	2,37E-06	0,0009	Myof
Ahr	5,38	0,29	34	2,52E-06	0,0009	Ahr
Ehd1	6,66	1,8	29,01	2,71E-06	0,0009	Ehd1
Mrc1	8,67	4,15	22,93	2,63E-06	0,0009	Mrc1
Fam65b	5,64	3,61	4,1	2,75E-06	0,0009	Fam65b
Nceh1	6,62	4,89	3,31	2,21E-06	0,0009	Nceh1
Aldh2	7,57	6,25	2,5	2,31E-06	0,0009	Aldh2
Cd274	5,27	4,31	1,94	2,59E-06	0,0009	Cd274
Plpp2	5,7	4,9	1,73	2,67E-06	0,0009	Plpp2
Numb	8,77	9,98	-2,32	2,63E-06	0,0009	Numb
Npl	5,29	6,79	-2,84	2,30E-06	0,0009	Npl
Mdfic	5,93	2,55	10,44	2,99E-06	0,0010	Mdfic
Ascl4	2,68	0,2	5,6	3,01E-06	0,0010	Ascl4
Rgs18	2,22	0,11	4,31	3,24E-06	0,0010	Rgs18
Zfp599	2,2	0,1	4,28	3,48E-06	0,0010	Zfp599
Idh2	6,42	7,21	-1,74	3,13E-06	0,0010	Idh2
Gm10790	5,39	7,19	-3,49	3,52E-06	0,0010	Gm10790
Lypd6	1,18	3,43	-4,76	3,13E-06	0,0010	Lypd6
Itgal	7,43	0,84	96,25	3,92E-06	0,0011	Itgal
Reps2	5,05	0,86	18,34	3,70E-06	0,0011	Reps2
Arhgap15	5,99	2,25	13,39	3,76E-06	0,0011	Arhgap15
Rara	3,98	0,54	10,85	4,03E-06	0,0011	Rara
Pxdc1	7,14	4,89	4,73	3,97E-06	0,0011	Pxdc1
Gm36365	6,8	8,44	-3,12	4,02E-06	0,0011	Gm36365
Ms4a14	5,66	0	50,64	4,28E-06	0,0012	Ms4a14
Itga4	6,75	1,35	42,26	4,55E-06	0,0012	Itga4
Clec4n	3,88	0	14,72	4,55E-06	0,0012	Clec4n
Unc119	3,28	0,23	8,31	4,26E-06	0,0012	Unc119
Scimp	6,33	3,45	7,37	4,57E-06	0,0012	Scimp
Fos	2,82	0,87	3,87	4,56E-06	0,0012	Fos
Rasgef1b	6,33	5,48	1,8	4,78E-06	0,0012	Rasgef1b
Mgll	3,27	5,06	-3,46	4,77E-06	0,0012	Mgll
Cxcr4	8,38	1,25	140	5,17E-06	0,0013	Cxcr4
Slfn4	2,69	0	6,44	5,61E-06	0,0013	Slfn4
Galc	6,88	5,08	3,47	5,35E-06	0,0013	Galc
Tom1l1	3,81	6,16	-5,1	5,54E-06	0,0013	Tom1l1
Igf1	5,17	0,94	18,7	6,26E-06	0,0014	Igf1
Emilin2	3,74	0,41	9,99	5,79E-06	0,0014	Emilin2
Metrnl	5,46	3,14	4,96	6,03E-06	0,0014	Metrnl
Creg2	3,09	1,35	3,34	6,24E-06	0,0014	Creg2
Pqlc1	4,96	3,8	2,23	5,88E-06	0,0014	Pqlc1
Fam110b	2,92	0,24	6,44	6,91E-06	0,0015	Fam110b
Cd79b	3,52	5,72	-4,62	6,52E-06	0,0015	Cd79b
Milr1	7,3	5,54	3,38	7,71E-06	0,0016	Milr1
Acsl3	3,69	2,39	2,47	7,41E-06	0,0016	Acsl3
Kctd17	4,1	2,86	2,36	7,46E-06	0,0016	Kctd17
Thbd	3,76	0,12	12,41	8,81E-06	0,0017	Thbd
Nlrc3	4,2	0,99	9,25	8,49E-06	0,0017	Nlrc3
Iqgap1	6,42	3,77	6,3	8,74E-06	0,0017	Iqgap1
Fzd7	4,71	2,35	5,15	8,27E-06	0,0017	Fzd7
Fchsd2	6,84	7,84	-2	9,02E-06	0,0017	Fchsd2
Slc40a1	6,13	7,14	-2	8,65E-06	0,0017	Slc40a1
Nav3	7,07	8,39	-2,49	7,79E-06	0,0017	Nav3
LOC108168886	3,6	5,83	-4,69	7,97E-06	0,0017	LOC108168886
Ppm1l	4,36	6,59	-4,7	9,05E-06	0,0017	Ppm1l
Cd74	10,82	6,1	26,46	9,85E-06	0,0018	Cd74
Dach1	4,06	0,11	15,43	9,85E-06	0,0018	Dach1
Ccr1	7,44	3,55	14,86	9,75E-06	0,0018	Ccr1
Ch25h	3,75	0,36	10,48	9,57E-06	0,0018	Ch25h
C920009B18Rik	4,59	1,54	8,26	9,34E-06	0,0018	C920009B18Rik
Myo5a	7,78	4,78	8,02	9,95E-06	0,0018	Myo5a
Clec7a	9,02	6,31	6,55	1,02E-05	0,0018	Clec7a
Rai14	4,62	1,96	6,32	1,08E-05	0,0018	Rai14
Tgfbi	9,55	7,1	5,45	1,07E-05	0,0018	Tgfbi
Spic	2,3	0	4,94	9,83E-06	0,0018	Spic
Tmem8	3,14	1,08	4,15	1,02E-05	0,0018	Tmem8
Trerf1	3,11	1,19	3,8	9,84E-06	0,0018	Trerf1
Fam189a2	1,49	0,1	2,62	1,02E-05	0,0018	Fam189a2
Jam3	3,84	5,31	-2,76	1,09E-05	0,0018	Jam3
Apobec2	0,12	1,89	-3,43	9,70E-06	0,0018	Apobec2
Slc39a12	2,73	4,64	-3,76	1,07E-05	0,0018	Slc39a12
Mdfi	3,97	6,77	-6,95	9,46E-06	0,0018	Mdfi
F630028O10Rik	5,05	1,02	16,31	1,13E-05	0,0019	F630028O10Rik
Nlrc4	3,75	0,11	12,47	1,13E-05	0,0019	Nlrc4
Slc28a2	2,84	0	7,18	1,18E-05	0,0019	Slc28a2
P3h2	6,88	8,45	-2,98	1,14E-05	0,0019	P3h2
Vim	4,6	1,95	6,25	1,26E-05	0,0020	Vim
Adap1	6,29	5,02	2,41	1,24E-05	0,0020	Adap1
Pla2g7	6,92	1,65	38,76	1,34E-05	0,0021	Pla2g7
Adam19	5,19	0,62	23,7	1,36E-05	0,0021	Adam19
Acp5	4,29	0,35	15,36	1,36E-05	0,0021	Acp5
Ldlrad3	3,6	1,1	5,66	1,35E-05	0,0021	Ldlrad3
Zc2hc1a	3,16	1,49	3,19	1,31E-05	0,0021	Zc2hc1a
Mtmr12	5,4	4,72	1,6	1,33E-05	0,0021	Mtmr12
Clec2i	4,79	1,1	12,84	1,56E-05	0,0022	Clec2i
Sh2d1b1	4,14	1,13	8,04	1,62E-05	0,0022	Sh2d1b1
Mcam	3,7	1,63	4,19	1,60E-05	0,0022	Mcam
Arpin	2,06	0,8	2,41	1,46E-05	0,0022	Arpin
Pdgfa	6,04	5,43	1,53	1,46E-05	0,0022	Pdgfa
Epn2	4,65	5,43	-1,72	1,49E-05	0,0022	Epn2
Ecscr	7,58	9	-2,69	1,43E-05	0,0022	Ecscr
Thsd1	1,83	3,53	-3,24	1,41E-05	0,0022	Thsd1
Tmc7	5,21	7,12	-3,76	1,60E-05	0,0022	Tmc7
Tnfsf8	5,7	2,54	8,93	1,70E-05	0,0023	Tnfsf8
Anxa5	7,16	5,45	3,28	1,66E-05	0,0023	Anxa5
B4galnt1	7,69	6,78	1,88	1,67E-05	0,0023	B4galnt1
Rfx3	3,51	4,42	-1,88	1,71E-05	0,0023	Rfx3
Gpr65	5,92	1,99	15,22	1,78E-05	0,0024	Gpr65
Aph1b	4,05	2,06	3,99	1,74E-05	0,0024	Aph1b
Mcemp1	2,28	0,4	3,7	1,84E-05	0,0024	Mcemp1
Ms4a6b	7,03	5,82	2,31	1,75E-05	0,0024	Ms4a6b
Large	6,96	7,71	-1,67	1,77E-05	0,0024	Large
Antxr2	4,49	0,79	12,91	1,87E-05	0,0025	Antxr2
Htra3	6,85	5,18	3,17	1,89E-05	0,0025	Htra3
Cxcl16	9,5	6,78	6,61	2,01E-05	0,0026	Cxcl16
AI504432	5,27	2,78	5,6	2,15E-05	0,0026	AI504432
Serpinb6b	3,03	0,6	5,37	2,12E-05	0,0026	Serpinb6b
Gdpd5	6,02	3,74	4,84	2,12E-05	0,0026	Gdpd5
Cox6b2	3	1,47	2,89	2,15E-05	0,0026	Cox6b2
Glipr1	6,03	4,52	2,85	2,12E-05	0,0026	Glipr1
Blvrb	5,62	4,32	2,47	1,98E-05	0,0026	Blvrb
Cit	2,88	2,09	1,73	2,03E-05	0,0026	Cit
Cacna1a	5,31	4,61	1,63	2,05E-05	0,0026	Cacna1a
Irf4	4,05	4,91	-1,81	1,97E-05	0,0026	Irf4
Rgs7bp	2,68	4,81	-4,36	2,01E-05	0,0026	Rgs7bp
Slamf7	5,73	0,25	44,79	2,30E-05	0,0027	Slamf7
Bmp2	2,4	0	5,29	2,31E-05	0,0027	Bmp2
Stxbp6	2,35	0,53	3,55	2,26E-05	0,0027	Stxbp6
Ptger3	0,44	2,63	-4,55	2,29E-05	0,0027	Ptger3
Dab2	8,71	5,4	9,92	2,41E-05	0,0028	Dab2
Gas7	4,59	1,49	8,53	2,52E-05	0,0028	Gas7
Xdh	3,6	0,53	8,44	2,41E-05	0,0028	Xdh
Bhlhe40	5,2	2,2	7,99	2,44E-05	0,0028	Bhlhe40
Itga8	2,73	0,64	4,26	2,43E-05	0,0028	Itga8
Cd52	9,3	7,63	3,19	2,36E-05	0,0028	Cd52
Eml2	3,79	2,18	3,04	2,37E-05	0,0028	Eml2
Hoxb7	1,03	0	2,05	2,41E-05	0,0028	Hoxb7
Lzts2	3,95	4,65	-1,62	2,47E-05	0,0028	Lzts2
Smap2	8,85	9,59	-1,66	2,44E-05	0,0028	Smap2
Tmem144	5,18	6,21	-2,05	2,47E-05	0,0028	Tmem144
Agmo	6,44	7,48	-2,05	2,48E-05	0,0028	Agmo
Itgae	2,02	3,13	-2,16	2,50E-05	0,0028	Itgae
Nrarp	4,53	5,9	-2,59	2,50E-05	0,0028	Nrarp
Sema4g	7,28	8,72	-2,71	2,51E-05	0,0028	Sema4g
Pdpn	3,77	0,11	12,61	2,73E-05	0,0029	Pdpn
Tmem176a	9,26	7,26	4,01	2,64E-05	0,0029	Tmem176a
Foxk2	6,46	7,08	-1,53	2,73E-05	0,0029	Foxk2
Emilin1	6,07	1,62	21,83	3,00E-05	0,0030	Emilin1
Sash1	4,94	1,52	10,68	2,79E-05	0,0030	Sash1
Plxnc1	4,37	1,23	8,8	2,82E-05	0,0030	Plxnc1
Msr1	2,35	0	5,12	2,78E-05	0,0030	Msr1
Nfxl1	7,73	6,07	3,17	2,98E-05	0,0030	Nfxl1
Mpp1	6,77	5,11	3,15	2,97E-05	0,0030	Mpp1
Pea15a	8,37	7,54	1,78	2,86E-05	0,0030	Pea15a
Tlr2	6,64	5,84	1,73	2,91E-05	0,0030	Tlr2
Pirb	3,49	2,73	1,7	2,88E-05	0,0030	Pirb
Tspan7	7,23	8,29	-2,08	2,76E-05	0,0030	Tspan7
St3gal5	6,88	7,95	-2,11	3,00E-05	0,0030	St3gal5
Gimap9	1,03	2,42	-2,62	2,81E-05	0,0030	Gimap9
Gm3134	4	5,47	-2,77	2,90E-05	0,0030	Gm3134
Pde2a	4,27	7,02	-6,73	2,81E-05	0,0030	Pde2a
Dnase1l1	4,75	2,8	3,85	3,08E-05	0,0031	Dnase1l1
Fbn2	1,5	0	2,84	3,09E-05	0,0031	Fbn2
Bcl2l14	1,27	0,35	1,9	3,09E-05	0,0031	Bcl2l14
Fam3c	6,67	5,92	1,68	3,19E-05	0,0031	Fam3c
Zbtb18	5,68	6,69	-2,01	3,15E-05	0,0031	Zbtb18
Pecam1	4,56	6,97	-5,32	3,16E-05	0,0031	Pecam1
Tnfrsf17	2,08	4,87	-6,92	3,18E-05	0,0031	Tnfrsf17
Map4k1	4,17	1,83	5,08	3,28E-05	0,0032	Map4k1
Vill	3,85	1,52	5,01	3,37E-05	0,0032	Vill
Cxcr3	3,54	1,55	3,98	3,27E-05	0,0032	Cxcr3
Dse	6,59	4,87	3,31	3,34E-05	0,0032	Dse
Cyp4f16	5,2	3,6	3,04	3,28E-05	0,0032	Cyp4f16
Slc2a3	4,87	3,37	2,82	3,40E-05	0,0032	Slc2a3
Sgsh	7,24	5,75	2,81	3,28E-05	0,0032	Sgsh
H2-DMa	8	6,9	2,14	3,35E-05	0,0032	H2-DMa
Aatk	4,18	3,48	1,62	3,33E-05	0,0032	Aatk
Cd48	6,48	5,82	1,59	3,40E-05	0,0032	Cd48
Gapt	1,74	0	3,35	3,54E-05	0,0033	Gapt
Slc38a6	8,08	6,64	2,71	3,49E-05	0,0033	Slc38a6
Gadl1	1,5	2,59	-2,13	3,47E-05	0,0033	Gadl1
H2-Eb1	8,66	3,15	45,54	3,85E-05	0,0034	H2-Eb1
Slit1	4,18	1,06	8,7	3,64E-05	0,0034	Slit1
Itgb8	4,15	1,04	8,61	3,75E-05	0,0034	Itgb8
Tmem205	5,46	2,75	6,54	3,73E-05	0,0034	Tmem205
Cd200r4	3,73	1,41	5	3,68E-05	0,0034	Cd200r4
Gk	4,22	1,98	4,73	3,84E-05	0,0034	Gk
Cyp4f17	3,57	1,39	4,54	3,69E-05	0,0034	Cyp4f17
Cerkl	2,34	0,39	3,87	3,85E-05	0,0034	Cerkl
Lamb2	3,8	5,28	-2,8	3,84E-05	0,0034	Lamb2
Dusp27	2,72	4,88	-4,49	3,78E-05	0,0034	Dusp27
Ccnd2	5,35	0,67	25,66	3,96E-05	0,0035	Ccnd2
Lrrc8c	4,54	2,43	4,3	3,99E-05	0,0035	Lrrc8c
Xylt2	7,02	5,47	2,92	3,93E-05	0,0035	Xylt2
Lpcat3	6,74	7,41	-1,6	3,89E-05	0,0035	Lpcat3
Bmpr1a	3,73	4,84	-2,15	4,09E-05	0,0035	Bmpr1a
Arsg	4,73	5,93	-2,3	4,08E-05	0,0035	Arsg
Bcl9l	6,79	8,17	-2,61	3,97E-05	0,0035	Bcl9l
Hnmt	3,7	5,28	-2,99	4,06E-05	0,0035	Hnmt
AW112010	6,7	4,46	4,71	4,26E-05	0,0036	AW112010
Pcgf2	4,84	2,88	3,9	4,25E-05	0,0036	Pcgf2
F630111L10Rik	1,76	0,36	2,63	4,11E-05	0,0036	F630111L10Rik
Igf1r	4,61	6,06	-2,73	4,17E-05	0,0036	Igf1r
Rtcb	8,9	7,6	2,46	4,39E-05	0,0037	Rtcb
Gatm	7,56	6,79	1,7	4,33E-05	0,0037	Gatm
Rftn1	6,16	3,81	5,11	4,50E-05	0,0038	Rftn1
Gfra2	1,31	0,53	1,73	4,52E-05	0,0038	Gfra2
Siglec1	8,42	2,83	48,16	4,68E-05	0,0039	Siglec1
Ms4a6c	8,27	5,64	6,18	4,63E-05	0,0039	Ms4a6c
Pdcd1	7,47	5,09	5,19	4,65E-05	0,0039	Pdcd1
Apoc4	2,08	0	4,24	4,64E-05	0,0039	Apoc4
Rbbp9	5,8	6,66	-1,81	4,79E-05	0,0039	Rbbp9
Gimap1	1,96	3,63	-3,18	4,66E-05	0,0039	Gimap1
Nedd9	4,65	1,96	6,44	4,89E-05	0,0040	Nedd9
Fxyd5	6,81	4,02	6,91	5,23E-05	0,0042	Fxyd5
Bst2	9,09	6,67	5,36	5,07E-05	0,0042	Bst2
Kcnj10	7,16	5,08	4,25	5,13E-05	0,0042	Kcnj10
Rnf43	1,96	0,11	3,59	5,14E-05	0,0042	Rnf43
Prrg1	1,67	0,2	2,77	5,25E-05	0,0042	Prrg1
P2ry2	2,44	1,19	2,38	5,32E-05	0,0042	P2ry2
Tmem176b	10,59	9,39	2,3	5,28E-05	0,0042	Tmem176b
Fpr1	1,04	0	2,06	5,32E-05	0,0042	Fpr1
Thbs1	5,66	4,9	1,69	5,21E-05	0,0042	Thbs1
Calm2	8,94	9,79	-1,81	5,16E-05	0,0042	Calm2
Tet1	2,73	4	-2,41	5,16E-05	0,0042	Tet1
Gm13889	0,94	3,26	-5,01	5,26E-05	0,0042	Gm13889
Runx2	3,76	0,75	8,08	5,45E-05	0,0043	Runx2
P2ry14	2,88	0,1	6,84	5,70E-05	0,0043	P2ry14
Fam214a	6,63	4,39	4,73	5,54E-05	0,0043	Fam214a
Ezr	4,82	2,62	4,61	5,63E-05	0,0043	Ezr
Bend4	2,13	0,29	3,6	5,63E-05	0,0043	Bend4
Pfkp	3,83	2,04	3,45	5,55E-05	0,0043	Pfkp
Fam212b	2,62	1,03	3,01	5,60E-05	0,0043	Fam212b
C3ar1	9,33	8,25	2,12	5,70E-05	0,0043	C3ar1
Pdlim2	5,6	4,89	1,64	5,74E-05	0,0043	Pdlim2
Cxxc5	8,1	9,05	-1,92	5,66E-05	0,0043	Cxxc5
Klhl3	3,85	5,64	-3,45	5,50E-05	0,0043	Klhl3
Crybb1	5,94	7,95	-4,04	5,51E-05	0,0043	Crybb1
Cybb	8,24	1,68	93,89	5,77E-05	0,0044	Cybb
Plxnd1	4,64	1,74	7,49	5,98E-05	0,0044	Plxnd1
Ptpn22	4,95	2,66	4,89	5,82E-05	0,0044	Ptpn22
Emp3	6,6	5,3	2,47	5,97E-05	0,0044	Emp3
Slc44a1	6,34	5,2	2,21	5,90E-05	0,0044	Slc44a1
Siglech	9,7	10,61	-1,88	5,94E-05	0,0044	Siglech
Mlph	5,28	7,55	-4,81	5,82E-05	0,0044	Mlph
H2-Ab1	8,15	3,76	20,98	6,21E-05	0,0046	H2-Ab1
Fgf2	6,28	2,79	11,21	6,23E-05	0,0046	Fgf2
Cyfip2	5,29	2,58	6,54	6,22E-05	0,0046	Cyfip2
Wfdc17	3,5	1,16	5,08	6,33E-05	0,0046	Wfdc17
Hoxb6	0,93	0	1,91	6,33E-05	0,0046	Hoxb6
Adgrg5	3,61	0,49	8,7	6,58E-05	0,0047	Adgrg5
Gpx3	2,57	0,54	4,07	6,44E-05	0,0047	Gpx3
Robo1	1,26	0,6	1,57	6,43E-05	0,0047	Robo1
Nrm	5,76	6,55	-1,72	6,56E-05	0,0047	Nrm
Serpine2	8,91	9,98	-2,09	6,51E-05	0,0047	Serpine2
Tmem51	3,5	0,19	9,9	6,80E-05	0,0049	Tmem51
Cdkn2a	3,17	0,39	6,89	6,93E-05	0,0049	Cdkn2a
Clic4	7,56	5,11	5,48	6,91E-05	0,0049	Clic4
St3gal1	5,4	2,99	5,31	6,99E-05	0,0049	St3gal1
Lmna	4,79	3,04	3,36	7,00E-05	0,0049	Lmna
Ccng2	7,98	8,73	-1,68	6,84E-05	0,0049	Ccng2
Klhl7	4,64	5,55	-1,88	6,85E-05	0,0049	Klhl7
Prkce	4,35	5,37	-2,03	6,78E-05	0,0049	Prkce
Cdc42bpg	5,61	1,64	15,68	7,26E-05	0,0050	Cdc42bpg
Slc11a1	9,97	9,22	1,69	7,28E-05	0,0050	Slc11a1
Liph	4,95	7,55	-6,06	7,26E-05	0,0050	Liph
Iqgap2	4,38	0,69	12,95	7,40E-05	0,0051	Iqgap2
Tle1	4,57	2,76	3,49	7,48E-05	0,0051	Tle1
4930455G09Rik	1,84	0,2	3,11	7,44E-05	0,0051	4930455G09Rik
S1pr2	5,31	3,71	3,03	7,38E-05	0,0051	S1pr2
Foxp4	5,38	4,29	2,14	7,47E-05	0,0051	Foxp4
Arvcf	6,21	7,4	-2,28	7,41E-05	0,0051	Arvcf
Aoah	4,52	0,48	16,48	7,76E-05	0,0052	Aoah
Cd72	8,15	4,96	9,17	7,97E-05	0,0053	Cd72
Kynu	3,85	1,41	5,43	7,84E-05	0,0053	Kynu
Grap2	2,35	0	5,09	8,01E-05	0,0053	Grap2
Tnni3	4,63	3,26	2,59	7,82E-05	0,0053	Tnni3
Adgrg1	8,9	10,24	-2,53	8,01E-05	0,0053	Adgrg1
Vcam1	7,61	2,77	28,64	8,28E-05	0,0054	Vcam1
Pltp	5,76	3,33	5,42	8,22E-05	0,0054	Pltp
St8sia4	6,38	4,44	3,83	8,18E-05	0,0054	St8sia4
Prkca	4,76	6,16	-2,65	8,27E-05	0,0054	Prkca
H2-Aa	8,27	2,96	39,67	8,51E-05	0,0056	H2-Aa
C630043F03Rik	3,08	0,46	6,17	8,73E-05	0,0057	C630043F03Rik
Hip1	4,78	2,2	5,98	8,79E-05	0,0057	Hip1
Best1	2,86	1,51	2,54	8,86E-05	0,0057	Best1
Pfn1	9,74	10,73	-1,98	8,79E-05	0,0057	Pfn1
Ncaph	1,36	2,52	-2,23	8,74E-05	0,0057	Ncaph
Ets1	6,78	7,98	-2,3	8,82E-05	0,0057	Ets1
Igsf9	4,82	3,3	2,87	8,97E-05	0,0058	Igsf9
Bin1	10,75	11,35	-1,51	9,05E-05	0,0058	Bin1
Sall3	7,4	8,39	-1,98	9,08E-05	0,0058	Sall3
Kng2	0,9	2,51	-3,06	9,10E-05	0,0058	Kng2
Hepacam2	2,38	0	5,19	9,49E-05	0,0059	Hepacam2
Slc26a11	4,85	2,58	4,82	9,35E-05	0,0059	Slc26a11
Ctsc	9,43	7,9	2,89	9,32E-05	0,0059	Ctsc
Hdac7	3,71	2,21	2,83	9,45E-05	0,0059	Hdac7
Crtap	6,94	6,1	1,79	9,35E-05	0,0059	Crtap
Zfp395	5,47	4,67	1,75	9,27E-05	0,0059	Zfp395
Farp1	2,91	4,61	-3,26	9,22E-05	0,0059	Farp1
Gm10791	2,36	0,1	4,79	9,63E-05	0,0060	Gm10791
Tiam1	4,69	5,99	-2,45	9,62E-05	0,0060	Tiam1
Dnajb14	5,94	4,77	2,24	9,83E-05	0,0061	Dnajb14
Fam26f	4,85	4,13	1,66	9,95E-05	0,0061	Fam26f
Nhs	0,43	2,75	-5,02	0,0001	0,0061	Nhs
Stard13	1,87	0	3,65	0,0001	0,0062	Stard13
Elmo1	8,41	9,08	-1,59	0,0001	0,0062	Elmo1
Prkar1b	6,5	5,41	2,12	0,0001	0,0063	Prkar1b
Itsn1	6,52	3,23	9,78	0,0001	0,0064	Itsn1
Apoc1	1,94	0,31	3,11	0,0001	0,0064	Apoc1
Arhgef18	4,31	5,05	-1,67	0,0001	0,0064	Arhgef18
B4galt4	7,07	7,92	-1,8	0,0001	0,0064	B4galt4
Khk	5,65	6,59	-1,91	0,0001	0,0064	Khk
Hsf2bp	2,67	4,16	-2,8	0,0001	0,0064	Hsf2bp
Axl	9,19	4,07	34,88	0,0001	0,0065	Axl
Kank2	5,82	3,62	4,6	0,0001	0,0065	Kank2
Fap	2,37	0,4	3,9	0,0001	0,0065	Fap
Gcm2	1,75	0,28	2,77	0,0001	0,0065	Gcm2
Stat2	6,84	5,9	1,93	0,0001	0,0065	Stat2
Nadk	8,92	8	1,89	0,0001	0,0065	Nadk
Rtn4rl1	7,16	8,74	-2,98	0,0001	0,0065	Rtn4rl1
Gimap6	3,01	4,79	-3,43	0,0001	0,0065	Gimap6
Tmem44	5,34	7,57	-4,71	0,0001	0,0065	Tmem44
Kcnab2	4,6	1,89	6,58	0,0001	0,0067	Kcnab2
Rnf150	6,52	5,19	2,51	0,0001	0,0067	Rnf150
Limd1	4,82	3,67	2,22	0,0001	0,0067	Limd1
Hdac9	6,12	5,14	1,98	0,0001	0,0067	Hdac9
Cass4	5,15	6,45	-2,45	0,0001	0,0067	Cass4
Fgl2	7,51	4,3	9,29	0,0001	0,0068	Fgl2
Tap1	7,24	6,46	1,72	0,0001	0,0068	Tap1
Grina	9,47	8,86	1,52	0,0001	0,0068	Grina
Gm1966	5,56	3,07	5,63	0,0001	0,0069	Gm1966
Gpr176	1,96	0,2	3,4	0,0001	0,0069	Gpr176
Sorl1	6,88	5,72	2,24	0,0001	0,0069	Sorl1
Tnfrsf11a	9	8,02	1,97	0,0001	0,0069	Tnfrsf11a
Frmd8	5,14	5,92	-1,73	0,0001	0,0069	Frmd8
Rhob	10,12	11,06	-1,91	0,0001	0,0069	Rhob
Mllt4	6,2	3,48	6,57	0,0001	0,0070	Mllt4
Sh3bp4	4,01	1,79	4,68	0,0001	0,0070	Sh3bp4
Sdc3	9,12	7,47	3,13	0,0001	0,0070	Sdc3
Aqp9	1,39	0	2,62	0,0001	0,0070	Aqp9
Wwp1	6,46	5,19	2,4	0,0001	0,0070	Wwp1
Rec8	1,35	0,3	2,07	0,0001	0,0070	Rec8
Hmox1	6,4	5,43	1,95	0,0001	0,0070	Hmox1
Esyt1	7,28	6,48	1,73	0,0001	0,0070	Esyt1
Rapgef5	8,29	9,02	-1,66	0,0001	0,0070	Rapgef5
Tead3	4,03	4,97	-1,92	0,0001	0,0070	Tead3
Armcx2	3,79	4,98	-2,29	0,0001	0,0070	Armcx2
Tppp	5,31	6,74	-2,7	0,0001	0,0070	Tppp
Ncs1	2,64	4,22	-2,99	0,0001	0,0070	Ncs1
Gpr31b	5,04	1,29	13,52	0,0001	0,0071	Gpr31b
Arhgef3	4,64	3,03	3,06	0,0001	0,0071	Arhgef3
Haus8	5,43	4,05	2,62	0,0001	0,0071	Haus8
Trpm2	6,74	5,44	2,47	0,0001	0,0071	Trpm2
Cyb5r1	6,68	5,4	2,44	0,0001	0,0071	Cyb5r1
Cd63	9,58	8,39	2,29	0,0001	0,0071	Cd63
Fsd2	1,12	0	2,18	0,0001	0,0071	Fsd2
Il10rb	10,91	10,03	1,85	0,0001	0,0071	Il10rb
Zfpm1	6,55	7,16	-1,52	0,0001	0,0071	Zfpm1
Hhex	6,54	7,2	-1,58	0,0001	0,0071	Hhex
Abcg2	4,65	5,42	-1,7	0,0001	0,0071	Abcg2
Thrsp	5,36	6,26	-1,87	0,0001	0,0071	Thrsp
Engase	5,52	6,81	-2,45	0,0001	0,0071	Engase
Lrrc39	2,86	4,16	-2,46	0,0001	0,0071	Lrrc39
Igf2bp2	2,11	4,27	-4,47	0,0001	0,0071	Igf2bp2
Col14a1	2,9	0	7,46	0,0001	0,0072	Col14a1
Aplp2	7,62	6,92	1,63	0,0001	0,0072	Aplp2
Prpsap2	6,37	7,19	-1,77	0,0001	0,0072	Prpsap2
Ppp1r9a	6,41	7,46	-2,08	0,0001	0,0072	Ppp1r9a
Plcg1	5,43	6,59	-2,23	0,0001	0,0072	Plcg1
Slc2a6	6,06	2,64	10,71	0,0001	0,0073	Slc2a6
Folr2	4,19	1,74	5,45	0,0001	0,0073	Folr2
Ak8	1,51	0,1	2,65	0,0001	0,0073	Ak8
Zcchc14	4,75	5,37	-1,54	0,0001	0,0073	Zcchc14
Cds1	7,19	8,02	-1,78	0,0001	0,0073	Cds1
Mmp28	0,77	2,61	-3,57	0,0001	0,0073	Mmp28
Plin3	5,94	4,85	2,12	0,0001	0,0074	Plin3
Tpst1	5,59	4,52	2,09	0,0001	0,0075	Tpst1
Gm14461	0,67	0	1,59	0,0001	0,0075	Gm14461
Mpi	5,86	7,1	-2,35	0,0001	0,0075	Mpi
Upk1b	5,99	7,95	-3,9	0,0001	0,0075	Upk1b
Apobec1	6,67	4,68	3,96	0,0002	0,0076	Apobec1
Gp9	3,67	4,95	-2,43	0,0002	0,0076	Gp9
Snx8	7,41	6,7	1,64	0,0002	0,0077	Snx8
Efnb1	3,73	4,69	-1,95	0,0002	0,0077	Efnb1
Atp2c1	7,05	8,3	-2,37	0,0002	0,0077	Atp2c1
Jam2	5,81	7,22	-2,66	0,0002	0,0077	Jam2
C030034L19Rik	3,15	0,71	5,43	0,0002	0,0078	C030034L19Rik
Capn1	6,4	4,74	3,15	0,0002	0,0078	Capn1
H2-T-ps	1,88	0,68	2,29	0,0002	0,0078	H2-T-ps
Osgin1	5,31	4,16	2,22	0,0002	0,0078	Osgin1
Smim14	6,27	5,59	1,6	0,0002	0,0078	Smim14
Rab34	4,48	5,67	-2,28	0,0002	0,0078	Rab34
B3gnt8	5,7	3,82	3,67	0,0002	0,0079	B3gnt8
Asb2	6,9	7,7	-1,74	0,0002	0,0079	Asb2
Ms4a4c	4,51	1,75	6,82	0,0002	0,0080	Ms4a4c
Slc1a5	4,14	2,13	4,03	0,0002	0,0080	Slc1a5
Lpl	6,53	5,17	2,56	0,0002	0,0080	Lpl
Sema6b	5,25	4,42	1,78	0,0002	0,0080	Sema6b
Rgs10	9,51	10,11	-1,51	0,0002	0,0080	Rgs10
Ptpn12	3,24	3,92	-1,6	0,0002	0,0080	Ptpn12
Vopp1	1,35	2,29	-1,92	0,0002	0,0080	Vopp1
Jup	6,11	7,23	-2,18	0,0002	0,0080	Jup
Klhl38	2,58	4,46	-3,67	0,0002	0,0080	Klhl38
Ifnlr1	3,23	0,18	8,24	0,0002	0,0081	Ifnlr1
Sema4a	4,07	2,48	3	0,0002	0,0081	Sema4a
Msrb1	6,8	6,02	1,71	0,0002	0,0081	Msrb1
Tmem64	6,2	7,34	-2,19	0,0002	0,0081	Tmem64
Clec4d	2,56	0	5,89	0,0002	0,0082	Clec4d
Hgf	4,07	1,8	4,83	0,0002	0,0082	Hgf
Csf2ra	9,06	7,51	2,93	0,0002	0,0082	Csf2ra
Chic1	3,28	1,81	2,77	0,0002	0,0082	Chic1
Txndc16	7,27	5,95	2,49	0,0002	0,0082	Txndc16
Samd4	2,35	1,58	1,7	0,0002	0,0082	Samd4
Pde3b	8,81	9,49	-1,6	0,0002	0,0082	Pde3b
Rab27a	6,44	7,44	-2	0,0002	0,0082	Rab27a
Dclk2	3,32	4,38	-2,08	0,0002	0,0082	Dclk2
Nbl1	2,06	3,53	-2,76	0,0002	0,0082	Nbl1
Eva1a	2,37	4,61	-4,7	0,0002	0,0082	Eva1a
Myo18b	2,78	6,38	-12,12	0,0002	0,0082	Myo18b
Vav3	2,23	0	4,69	0,0002	0,0083	Vav3
Sema7a	1,73	0,96	1,71	0,0002	0,0083	Sema7a
Myadml2	3,13	4,25	-2,17	0,0002	0,0083	Myadml2
Prrt3	1,99	1,21	1,73	0,0002	0,0084	Prrt3
Cd300lf	6,76	2,91	14,45	0,0002	0,0085	Cd300lf
Snx29	7,13	7,8	-1,59	0,0002	0,0085	Snx29
Gmpr	4,61	5,74	-2,19	0,0002	0,0085	Gmpr
Cd38	2,18	0,11	4,2	0,0002	0,0086	Cd38
Sez6l	4	2,93	2,09	0,0002	0,0086	Sez6l
Pitpnc1	6,28	6,93	-1,57	0,0002	0,0086	Pitpnc1
Gm39888	2,03	0,1	3,79	0,0002	0,0087	Gm39888
Gla	4,44	3,24	2,3	0,0002	0,0087	Gla
Adra2a	0	1,08	-2,12	0,0002	0,0087	Adra2a
AF529169	2,73	1,23	2,84	0,0002	0,0089	AF529169
Cfp	2,99	1,93	2,09	0,0002	0,0089	Cfp
Spats2l	1,82	0,28	2,92	0,0002	0,0091	Spats2l
Cdk5r1	7,56	8,45	-1,85	0,0002	0,0091	Cdk5r1
Fuom	4,26	2,78	2,79	0,0002	0,0092	Fuom
Tbc1d8	7,76	6,67	2,12	0,0002	0,0092	Tbc1d8
Ppfibp1	4,35	3,09	2,38	0,0002	0,0094	Ppfibp1
Cecr6	1,36	0,45	1,87	0,0002	0,0094	Cecr6
Ank	8,12	7,22	1,87	0,0002	0,0094	Ank
Mfsd12	6,93	6,25	1,6	0,0002	0,0094	Mfsd12
Rab6b	5,75	6,57	-1,77	0,0002	0,0094	Rab6b
Alpk1	5,13	3,58	2,93	0,0002	0,0095	Alpk1
Xylt1	5,43	2,97	5,5	0,0002	0,0096	Xylt1
Ubxn11	3,5	1,93	2,98	0,0002	0,0096	Ubxn11
Sptbn1	6,47	5,16	2,48	0,0002	0,0096	Sptbn1
Ccdc102a	5,3	4,05	2,37	0,0002	0,0096	Ccdc102a
Fblim1	7,6	6,65	1,94	0,0002	0,0096	Fblim1
Atmin	4,22	5,15	-1,91	0,0002	0,0096	Atmin
Tmbim1	6,05	4,75	2,45	0,0002	0,0097	Tmbim1
Zmynd15	6,4	3,59	7	0,0002	0,0098	Zmynd15
H2-DMb2	6,02	4,67	2,54	0,0002	0,0098	H2-DMb2
Tgfa	5,22	6,75	-2,88	0,0002	0,0098	Tgfa
Mgst1	2,88	0,14	6,68	0,0002	0,0099	Mgst1
Zc3h12d	2,8	0,39	5,31	0,0002	0,0099	Zc3h12d
Rasgrp1	3,34	1,41	3,8	0,0002	0,0099	Rasgrp1
Fscn1	7,54	8,51	-1,96	0,0002	0,0099	Fscn1
Abcb4	4,72	5,88	-2,23	0,0002	0,0099	Abcb4
Kcnk12	3,46	4,95	-2,82	0,0002	0,0099	Kcnk12
Plxna1	5,49	3,53	3,9	0,0002	0,0100	Plxna1
Mvb12a	5,18	4,04	2,2	0,0002	0,0100	Mvb12a
Capn2	4,23	3,12	2,17	0,0002	0,0100	Capn2
Capg	5,6	4,89	1,64	0,0002	0,0100	Capg
Gm12589	0,67	0	1,59	0,0002	0,0100	Gm12589
Satb1	2,61	4,24	-3,09	0,0002	0,0100	Satb1
Fam132a	3,42	1,02	5,28	0,0003	0,0102	Fam132a
Gabbr1	5,39	6,88	-2,8	0,0002	0,0102	Gabbr1
Asph	8,53	9,62	-2,13	0,0003	0,0103	Asph
Nynrin	3,27	4,41	-2,2	0,0003	0,0103	Nynrin
Cdkn1a	6,77	4,47	4,9	0,0003	0,0105	Cdkn1a
Atrnl1	3,93	1,98	3,85	0,0003	0,0105	Atrnl1
Tm4sf5	1,97	0,21	3,38	0,0003	0,0105	Tm4sf5
Il18bp	3,6	2,53	2,1	0,0003	0,0105	Il18bp
Pilra	6,5	5,51	2	0,0003	0,0105	Pilra
P2rx4	6,36	5,4	1,94	0,0003	0,0105	P2rx4
Rab11fip1	0,89	0	1,86	0,0003	0,0105	Rab11fip1
Tmem52	6,47	5,62	1,8	0,0003	0,0105	Tmem52
Glis3	0	0,68	-1,6	0,0003	0,0105	Glis3
Snn	7,63	8,79	-2,23	0,0003	0,0105	Snn
Igfbp4	6,58	5,59	1,97	0,0003	0,0106	Igfbp4
Osbpl11	6,87	7,6	-1,65	0,0003	0,0106	Osbpl11
Slc25a37	2,37	3,11	-1,67	0,0003	0,0106	Slc25a37
Ccl2	5,8	3	6,96	0,0003	0,0107	Ccl2
Kdm2b	3,42	4,05	-1,55	0,0003	0,0107	Kdm2b
Tln2	5,49	6,21	-1,64	0,0003	0,0107	Tln2
Cpd	7,34	5,89	2,74	0,0003	0,0108	Cpd
Nme4	3,2	2,16	2,07	0,0003	0,0108	Nme4
Cx3cr1	10,3	11,68	-2,6	0,0003	0,0108	Cx3cr1
Kcna3	6,64	4,09	5,84	0,0003	0,0110	Kcna3
Tnip3	2,02	0,11	3,74	0,0003	0,0110	Tnip3
Slc41a2	1,94	0,27	3,17	0,0003	0,0110	Slc41a2
Tubb6	5,64	4,77	1,82	0,0003	0,0110	Tubb6
Smpdl3a	6,02	5,17	1,8	0,0003	0,0110	Smpdl3a
Cdca7	4,66	5,91	-2,38	0,0003	0,0110	Cdca7
Cd300ld	3,46	0,98	5,55	0,0003	0,0111	Cd300ld
Pigs	7,88	7	1,84	0,0003	0,0111	Pigs
Siglece	8,71	8,01	1,62	0,0003	0,0111	Siglece
Map3k9	5,67	6,34	-1,59	0,0003	0,0111	Map3k9
Scube1	2,25	3,54	-2,43	0,0003	0,0111	Scube1
Spp1	5,51	2,41	8,55	0,0003	0,0112	Spp1
Gucy1a3	1,12	0,12	2	0,0003	0,0112	Gucy1a3
Ptprc	7,7	7,11	1,51	0,0003	0,0112	Ptprc
Yes1	2,6	4,21	-3,05	0,0003	0,0112	Yes1
Cd44	5,34	2,24	8,6	0,0003	0,0115	Cd44
Chp2	1,96	0,18	3,44	0,0003	0,0115	Chp2
Stbd1	4,69	3,01	3,22	0,0003	0,0115	Stbd1
Gpr162	5,42	4	2,68	0,0003	0,0115	Gpr162
Slc5a10	1,19	4,29	-8,61	0,0003	0,0115	Slc5a10
Pxk	5,59	6,56	-1,96	0,0003	0,0116	Pxk
Actn1	4,46	5,9	-2,71	0,0003	0,0116	Actn1
Cux2	2,38	4,24	-3,64	0,0003	0,0116	Cux2
Tespa1	1,73	0	3,32	0,0003	0,0117	Tespa1
Clec10a	1,98	0,35	3,09	0,0003	0,0117	Clec10a
Galnt3	5,35	4,15	2,29	0,0003	0,0117	Galnt3
Eefsec	4,93	5,54	-1,53	0,0003	0,0117	Eefsec
Vis1	2,79	3,76	-1,96	0,0003	0,0117	Vis1
Dpy19l3	2,23	3,62	-2,62	0,0003	0,0117	Dpy19l3
Gstm1	4,07	3,02	2,08	0,0003	0,0118	Gstm1
Plcl1	5,42	7,01	-3,01	0,0003	0,0118	Plcl1
Sept5	2,31	1,55	1,7	0,0003	0,0119	Sept5
Mical3	4,43	5,58	-2,21	0,0003	0,0119	Mical3
Ccdc162	3,23	5,26	-4,08	0,0003	0,0119	Ccdc162
Degs1	6,63	5,94	1,61	0,0003	0,0120	Degs1
Sik2	3,69	4,31	-1,53	0,0003	0,0120	Sik2
Pxylp1	2,87	0,85	4,06	0,0003	0,0121	Pxylp1
0610038B21Rik	1,31	0,37	1,92	0,0003	0,0121	0610038B21Rik
Eps15	7,33	6,49	1,8	0,0003	0,0121	Eps15
Pml	5,58	4,77	1,75	0,0003	0,0121	Pml
Cracr2a	5,6	4,91	1,62	0,0003	0,0121	Cracr2a
Ldhb	6,52	7,51	-1,99	0,0003	0,0121	Ldhb
LOC108168194	0,11	1,23	-2,17	0,0003	0,0121	LOC108168194
Dlc1	1,09	2,57	-2,79	0,0003	0,0121	Dlc1
Tmem57	4,84	4,12	1,65	0,0003	0,0123	Tmem57
Ccl7	2,74	0,39	5,1	0,0003	0,0124	Ccl7
Tnfsf13b	7,91	6,47	2,71	0,0003	0,0124	Tnfsf13b
Gm34780	0,88	0	1,84	0,0003	0,0124	Gm34780
Hectd2	3,35	2,52	1,78	0,0003	0,0124	Hectd2
Eng	7,9	9	-2,14	0,0003	0,0124	Eng
Nos1ap	4,86	5,98	-2,17	0,0003	0,0124	Nos1ap
Fam13a	2,61	3,87	-2,38	0,0003	0,0124	Fam13a
Rab11fip4	3,49	2,2	2,45	0,0004	0,0125	Rab11fip4
Gpd2	3,51	2,46	2,06	0,0004	0,0125	Gpd2
5430437J10Rik	0,89	0	1,86	0,0004	0,0125	5430437J10Rik
Ptpru	2,24	1,36	1,84	0,0004	0,0125	Ptpru
Zfp532	5,05	5,82	-1,71	0,0004	0,0125	Zfp532
Cd4	1,93	0,12	3,51	0,0004	0,0126	Cd4
Nfkbiz	7,94	6,46	2,8	0,0004	0,0126	Nfkbiz
Tpk1	3,81	3,12	1,61	0,0004	0,0126	Tpk1
Dip2b	7,67	8,5	-1,77	0,0004	0,0126	Dip2b
Pim2	3,9	4,88	-1,98	0,0004	0,0126	Pim2
Tmem204	4,35	6,06	-3,28	0,0004	0,0126	Tmem204
Psd3	3,78	1,56	4,67	0,0004	0,0127	Psd3
Adgra3	3,45	4,68	-2,36	0,0004	0,0127	Adgra3
F830208F22Rik	3,13	1,69	2,71	0,0004	0,0128	F830208F22Rik
Aifm2	2,04	0,92	2,18	0,0004	0,0129	Aifm2
Tbc1d16	7,12	7,77	-1,57	0,0004	0,0129	Tbc1d16
Kctd12	6,6	7,38	-1,71	0,0004	0,0129	Kctd12
Trim55	1,31	0	2,48	0,0004	0,0130	Trim55
C3	5,85	1,83	16,28	0,0004	0,0131	C3
Etl4	3,59	1,54	4,14	0,0004	0,0131	Etl4
Car13	2,39	0,69	3,24	0,0004	0,0131	Car13
Lancl2	3,05	1,89	2,23	0,0004	0,0131	Lancl2
Gramd1b	6,25	5,18	2,09	0,0004	0,0131	Gramd1b
Cib1	5,49	6,2	-1,63	0,0004	0,0131	Cib1
Prickle1	2,07	2,87	-1,73	0,0004	0,0131	Prickle1
Edem1	7,35	8,31	-1,94	0,0004	0,0131	Edem1
Lox	4,53	1,8	6,63	0,0004	0,0132	Lox
Ifnar1	8,44	7,29	2,22	0,0004	0,0132	Ifnar1
Sardh	2,67	3,35	-1,6	0,0004	0,0132	Sardh
Ephb3	3,52	4,25	-1,66	0,0004	0,0132	Ephb3
Usp2	8,47	9,33	-1,81	0,0004	0,0132	Usp2
Adamts16	4,09	5,7	-3,05	0,0004	0,0132	Adamts16
Perp	0,89	2,69	-3,46	0,0004	0,0132	Perp
Slc43a1	1,15	3,22	-4,22	0,0004	0,0132	Slc43a1
Pde10a	3,99	2,38	3,06	0,0004	0,0133	Pde10a
Rab4a	1,26	2,61	-2,56	0,0004	0,0133	Rab4a
Tmem261	5,8	4,57	2,34	0,0004	0,0134	Tmem261
Rab39	5,69	6,44	-1,68	0,0004	0,0134	Rab39
Pik3r1	7,85	8,62	-1,71	0,0004	0,0134	Pik3r1
Cnn2	3,93	4,85	-1,89	0,0004	0,0134	Cnn2
Afm	0,93	1,85	-1,9	0,0004	0,0134	Afm
Lrrc75a	5,49	6,64	-2,22	0,0004	0,0134	Lrrc75a
LOC100038947	2,33	0	5,03	0,0004	0,0135	LOC100038947
Arhgap10	3,54	1,24	4,93	0,0004	0,0135	Arhgap10
Hoxb3	2,34	0,41	3,82	0,0004	0,0135	Hoxb3
Chst7	5,62	6,53	-1,88	0,0004	0,0135	Chst7
Bambi-ps1	1,78	0,26	2,87	0,0004	0,0136	Bambi-ps1
4930486L24Rik	3,07	2,16	1,87	0,0004	0,0136	4930486L24Rik
Cnrip1	3,58	4,67	-2,13	0,0004	0,0136	Cnrip1
Plin2	7,36	6,3	2,08	0,0004	0,0137	Plin2
Cd22	6,78	5,91	1,83	0,0004	0,0137	Cd22
Rasa2	3,9	3,1	1,74	0,0004	0,0137	Rasa2
Ero1l	5,44	4,79	1,57	0,0004	0,0137	Ero1l
Eid2b	3,18	3,81	-1,56	0,0004	0,0137	Eid2b
Vprbp	4,36	5,24	-1,83	0,0004	0,0137	Vprbp
LOC102632541	0	1,05	-2,07	0,0004	0,0137	LOC102632541
Ccl9	6,66	8,24	-2,99	0,0004	0,0137	Ccl9
Rab3d	4,41	2,92	2,8	0,0004	0,0138	Rab3d
Slc25a24	1,38	0	2,6	0,0004	0,0138	Slc25a24
Casc4	1,09	2,53	-2,72	0,0004	0,0138	Casc4
Tmem150b	3,72	1,61	4,31	0,0004	0,0139	Tmem150b
Smim24	4,81	3,88	1,91	0,0004	0,0139	Smim24
Slc16a10	5,11	4,5	1,52	0,0004	0,0139	Slc16a10
Cacfd1	4,89	3,98	1,89	0,0004	0,0140	Cacfd1
Slc6a6	8,42	7,8	1,54	0,0004	0,0140	Slc6a6
Ccr6	2,9	3,92	-2,03	0,0004	0,0141	Ccr6
Ltb	1,91	2,81	-1,87	0,0005	0,0142	Ltb
Shtn1	3,29	1,46	3,54	0,0005	0,0143	Shtn1
Slc16a1	4,07	4,77	-1,63	0,0005	0,0143	Slc16a1
Gm32448	2,41	0,37	4,11	0,0005	0,0144	Gm32448
Etv4	3,34	1,46	3,67	0,0005	0,0144	Etv4
H2-Bl	3,67	1,98	3,23	0,0005	0,0144	H2-Bl
H2-K2	3,97	2,88	2,13	0,0005	0,0144	H2-K2
Rasgrf1	3,02	2,03	2	0,0005	0,0144	Rasgrf1
Ccdc69	1,73	0,9	1,78	0,0005	0,0144	Ccdc69
Shcbp1l	1,49	0,79	1,62	0,0005	0,0144	Shcbp1l
Qprt	1,59	2,57	-1,98	0,0005	0,0144	Qprt
Nav2	6,28	7,29	-2	0,0005	0,0144	Nav2
Sgce	6,07	7,29	-2,32	0,0005	0,0144	Sgce
Mycl	4,77	6,36	-3	0,0005	0,0144	Mycl
Ifi204	4,86	1,95	7,49	0,0005	0,0145	Ifi204
Fcho1	3,96	2,17	3,48	0,0005	0,0145	Fcho1
Caprin2	2,06	1,35	1,64	0,0005	0,0145	Caprin2
Gm3325	1,71	2,38	-1,59	0,0005	0,0145	Gm3325
Ngfrap1	4,82	3,99	1,77	0,0005	0,0146	Ngfrap1
Sema4b	3,89	4,86	-1,96	0,0005	0,0146	Sema4b
Fgd1	1,89	0,3	3,02	0,0005	0,0147	Fgd1
Chst8	4,41	6,37	-3,9	0,0005	0,0147	Chst8
Ctsb	12,55	11,91	1,56	0,0005	0,0148	Ctsb
Alcam	2,71	0,66	4,12	0,0005	0,0149	Alcam
Lrrc4b	1,97	0,85	2,18	0,0005	0,0150	Lrrc4b
Man2a1	4,79	4	1,74	0,0005	0,0150	Man2a1
Ybx1	7,64	7,01	1,55	0,0005	0,0150	Ybx1
Hps5	7,07	6,46	1,52	0,0005	0,0150	Hps5
Slco2b1	10,51	11,1	-1,51	0,0005	0,0150	Slco2b1
Col6a3	1,2	4,26	-8,37	0,0005	0,0150	Col6a3
Lrguk	4,11	2,94	2,25	0,0005	0,0151	Lrguk
Naa35	5,87	6,75	-1,85	0,0005	0,0151	Naa35
Hspb3	4,66	5,58	-1,89	0,0005	0,0151	Hspb3
Csmd3	3,97	6,18	-4,61	0,0005	0,0151	Csmd3
F13a1	4,27	1,41	7,23	0,0005	0,0152	F13a1
Fgr	4,74	3,28	2,76	0,0005	0,0152	Fgr
Mpzl3	1,57	0,51	2,08	0,0005	0,0154	Mpzl3
Nefl	2,69	1,87	1,76	0,0005	0,0154	Nefl
Uhrf1bp1l	5,12	4,44	1,6	0,0005	0,0154	Uhrf1bp1l
Nova1	1,84	3,36	-2,88	0,0005	0,0155	Nova1
Kcnh4	4,15	1,98	4,51	0,0005	0,0156	Kcnh4
P4ha2	2,3	0,93	2,58	0,0005	0,0156	P4ha2
Marveld1	4,42	3,18	2,36	0,0005	0,0156	Marveld1
Dapp1	6,42	7,31	-1,85	0,0005	0,0156	Dapp1
Ccdc149	1,14	2,29	-2,22	0,0005	0,0156	Ccdc149
Atp8a2	7,96	9,27	-2,49	0,0005	0,0156	Atp8a2
Pnpla8	4,52	5,14	-1,53	0,0005	0,0157	Pnpla8
Palld	1,68	2,92	-2,36	0,0005	0,0157	Palld
Ube2l6	5,29	4,69	1,52	0,0005	0,0159	Ube2l6
Khdrbs3	2,05	4,05	-4	0,0005	0,0159	Khdrbs3
Marcks	6,19	6,86	-1,59	0,0006	0,0161	Marcks
Dock9	6,35	7,26	-1,88	0,0006	0,0161	Dock9
Il1rn	2,18	0,48	3,26	0,0006	0,0162	Il1rn
Slc14a1	4,92	3,36	2,96	0,0006	0,0162	Slc14a1
Atp1a3	8,26	6,89	2,58	0,0006	0,0162	Atp1a3
Pmepa1	7,63	6,7	1,91	0,0006	0,0162	Pmepa1
Itgb7	0,85	0,1	1,68	0,0006	0,0162	Itgb7
Ebi3	6,15	5,5	1,57	0,0006	0,0162	Ebi3
Ppp2r1b	6,17	6,83	-1,58	0,0006	0,0162	Ppp2r1b
Trio	8,19	8,85	-1,58	0,0006	0,0162	Trio
Stxbp5	3,73	4,62	-1,86	0,0006	0,0162	Stxbp5
Whrn	7,79	8,87	-2,11	0,0006	0,0162	Whrn
Ddah2	4,76	5,93	-2,26	0,0006	0,0162	Ddah2
Mmp15	2,45	4,1	-3,13	0,0006	0,0162	Mmp15
Nlrc5	6,08	4,05	4,07	0,0006	0,0165	Nlrc5
Adam9	6,42	5,76	1,58	0,0006	0,0167	Adam9
Otud7b	5,54	6,28	-1,67	0,0006	0,0167	Otud7b
Lpcat4	3,61	1,91	3,25	0,0006	0,0168	Lpcat4
Aldh1b1	2,6	1,11	2,81	0,0006	0,0168	Aldh1b1
Elavl2	1,53	0,78	1,68	0,0006	0,0168	Elavl2
Pde4d	2,29	3,25	-1,94	0,0006	0,0168	Pde4d
Tsku	1,57	0	2,98	0,0006	0,0169	Tsku
Synpo	1,93	0,71	2,32	0,0006	0,0169	Synpo
Cysltr2	1,07	0	2,09	0,0006	0,0169	Cysltr2
Rnf145	6,33	5,6	1,66	0,0006	0,0169	Rnf145
Frat1	3,71	4,37	-1,58	0,0006	0,0169	Frat1
Fam131a	4,49	5,34	-1,81	0,0006	0,0170	Fam131a
Prox2	3,03	4,14	-2,17	0,0006	0,0170	Prox2
Sfmbt2	1,02	3,52	-5,63	0,0006	0,0170	Sfmbt2
March3	4,46	3,8	1,58	0,0006	0,0171	March3
Gpd1	3,56	5,23	-3,17	0,0006	0,0172	Gpd1
Adam33	2,7	0,22	5,61	0,0006	0,0174	Adam33
Gpr34	9,41	10,31	-1,87	0,0006	0,0174	Gpr34
Gab3	5,44	3,33	4,31	0,0007	0,0176	Gab3
Incenp	5,44	4,47	1,95	0,0007	0,0176	Incenp
Zfp691	5,38	6,2	-1,76	0,0007	0,0176	Zfp691
Rbm38	5,97	6,91	-1,92	0,0006	0,0176	Rbm38
Asxl3	1	0,22	1,71	0,0007	0,0177	Asxl3
5730435O14Rik	0,78	1,86	-2,11	0,0007	0,0178	5730435O14Rik
Ciita	4,14	0,61	11,55	0,0007	0,0179	Ciita
Bcl2	4,02	2,76	2,38	0,0007	0,0179	Bcl2
Ptprm	6,28	7,18	-1,87	0,0007	0,0179	Ptprm
Lilra5	6,97	5,43	2,9	0,0007	0,0180	Lilra5
Atp2a1	1,02	0,11	1,87	0,0007	0,0180	Atp2a1
Zfp69	3,28	4,22	-1,91	0,0007	0,0180	Zfp69
Slc2a5	6,46	7,93	-2,78	0,0007	0,0180	Slc2a5
Rap2a	7,7	6,96	1,67	0,0007	0,0181	Rap2a
Apob	0,36	1,46	-2,14	0,0007	0,0182	Apob
Stx3	2,88	1,76	2,18	0,0007	0,0183	Stx3
Coro2a	5,4	6,26	-1,82	0,0007	0,0183	Coro2a
4833411C07Rik	6	4,24	3,4	0,0007	0,0185	4833411C07Rik
Dusp1	3,19	2,27	1,88	0,0007	0,0185	Dusp1
Zfp827	2,68	4,39	-3,27	0,0007	0,0185	Zfp827
H2-Q4	7,14	5,52	3,06	0,0007	0,0186	H2-Q4
Fut4	4,31	2,81	2,82	0,0007	0,0186	Fut4
Dnajb13	1,42	0,21	2,31	0,0007	0,0186	Dnajb13
Pbdc1	3,51	2,88	1,54	0,0007	0,0186	Pbdc1
Rasgrp3	6,47	7,1	-1,55	0,0007	0,0186	Rasgrp3
Mrc2	6,1	7,24	-2,2	0,0007	0,0186	Mrc2
2610507B11Rik	8,3	7,45	1,8	0,0007	0,0188	2610507B11Rik
Tspan9	4,68	5,5	-1,77	0,0007	0,0188	Tspan9
Car9	3,05	1,4	3,12	0,0007	0,0189	Car9
Krt80	2,07	0,52	2,94	0,0007	0,0189	Krt80
Masp1	4,15	2,79	2,56	0,0007	0,0189	Masp1
Cldn1	1,45	0,55	1,87	0,0007	0,0189	Cldn1
1190002N15Rik	6,25	5,56	1,61	0,0007	0,0189	1190002N15Rik
Glb1	7,94	7,28	1,59	0,0007	0,0189	Glb1
Casp3	5,45	6,33	-1,83	0,0007	0,0189	Casp3
Nat1	0,59	1,79	-2,29	0,0007	0,0189	Nat1
Prox1	2,91	4,48	-2,98	0,0007	0,0189	Prox1
Sestd1	3,11	0,94	4,51	0,0007	0,0190	Sestd1
Ntng1	2,35	1,21	2,2	0,0007	0,0190	Ntng1
C130050O18Rik	4,76	4,14	1,54	0,0007	0,0190	C130050O18Rik
Slc1a3	5,57	6,93	-2,57	0,0007	0,0190	Slc1a3
Icosl	8,06	7,09	1,95	0,0008	0,0191	Icosl
Rftn2	1,8	0,93	1,83	0,0008	0,0191	Rftn2
Tshz3	0,64	0	1,56	0,0008	0,0191	Tshz3
Chrna7	1,05	0,42	1,54	0,0008	0,0191	Chrna7
Cd69	2,41	0,2	4,64	0,0008	0,0192	Cd69
Fgf14	2,1	0,74	2,58	0,0008	0,0192	Fgf14
Pcnx	6,06	5,44	1,54	0,0008	0,0192	Pcnx
Uggt2	0,85	1,66	-1,76	0,0008	0,0192	Uggt2
Eogt	6,55	5,9	1,57	0,0008	0,0193	Eogt
Pde8a	2,51	1,67	1,79	0,0008	0,0194	Pde8a
Erf	7,81	8,69	-1,85	0,0008	0,0194	Erf
Dennd2d	2,69	1,36	2,51	0,0008	0,0195	Dennd2d
D17H6S56E-5	7,38	6,24	2,2	0,0008	0,0195	D17H6S56E-5
Pnma2	0,43	1,84	-2,66	0,0008	0,0195	Pnma2
Ddo	1,59	0	3,02	0,0008	0,0196	Ddo
Hacd4	6,76	5,44	2,5	0,0008	0,0196	Hacd4
Gnptab	6,82	5,8	2,03	0,0008	0,0196	Gnptab
Lrrc16a	4,47	2,54	3,81	0,0008	0,0199	Lrrc16a
Usp24	5,3	6,14	-1,79	0,0008	0,0199	Usp24
Ttc9	3,09	4,3	-2,3	0,0008	0,0199	Ttc9
Sp100	6,59	5,07	2,87	0,0008	0,0200	Sp100
Plvap	2,64	3,46	-1,76	0,0008	0,0200	Plvap
E2f1	3,67	2,31	2,57	0,0008	0,0202	E2f1
Dpp7	6,25	5,16	2,13	0,0008	0,0202	Dpp7
Cxcl14	3,71	0,6	8,59	0,0008	0,0204	Cxcl14
Map4k4	6,88	7,67	-1,73	0,0008	0,0204	Map4k4
Atp8b1	2,72	4,08	-2,57	0,0008	0,0204	Atp8b1
AI607873	7,14	2,54	24,25	0,0009	0,0205	AI607873
Frmd6	2,9	1,13	3,42	0,0008	0,0205	Frmd6
Rxrg	3,71	1,98	3,31	0,0009	0,0205	Rxrg
Ptprz1	1,33	0,6	1,65	0,0009	0,0205	Ptprz1
Pik3r5	7,2	8,16	-1,95	0,0009	0,0205	Pik3r5
Gm15880	0,47	2,01	-2,91	0,0009	0,0205	Gm15880
Foxred2	1,96	0,53	2,7	0,0009	0,0206	Foxred2
Mapkapk3	6,24	5,28	1,95	0,0009	0,0206	Mapkapk3
Snap91	2,01	1,36	1,58	0,0009	0,0206	Snap91
Lmo7	0,94	0,29	1,57	0,0009	0,0206	Lmo7
Adcy6	3,12	4,17	-2,07	0,0009	0,0206	Adcy6
Grin1	4,7	3,55	2,22	0,0009	0,0207	Grin1
Tspan33	4,93	5,52	-1,51	0,0009	0,0207	Tspan33
Mir17hg	2,71	3,6	-1,85	0,0009	0,0207	Mir17hg
Gab1	4,89	6,16	-2,4	0,0009	0,0207	Gab1
Htatip2	4,07	2,66	2,64	0,0009	0,0208	Htatip2
Pard3b	2,58	4,62	-4,11	0,0009	0,0208	Pard3b
B230217C12Rik	2,12	1,39	1,66	0,0009	0,0209	B230217C12Rik
Kcnk10	1,84	0,59	2,39	0,0009	0,0211	Kcnk10
Ets2	3,87	3	1,83	0,0009	0,0211	Ets2
Osbpl3	2,32	1,67	1,57	0,0009	0,0211	Osbpl3
Clstn1	8,68	9,3	-1,54	0,0009	0,0211	Clstn1
Zc3h12b	2	3,21	-2,32	0,0009	0,0211	Zc3h12b
Fut10	3,52	4,85	-2,52	0,0009	0,0211	Fut10
Fam212a	7,59	8,36	-1,7	0,0009	0,0213	Fam212a
Ldlr	6,14	4,66	2,79	0,0009	0,0215	Ldlr
Ccdc85c	3,93	4,85	-1,9	0,0009	0,0215	Ccdc85c
Slfn1	2,33	0,05	4,86	0,0009	0,0217	Slfn1
Ralgds	4,71	3,43	2,43	0,0009	0,0217	Ralgds
Fam161a	3,44	2,17	2,41	0,0009	0,0217	Fam161a
Gm33046	1,22	0,2	2,03	0,0009	0,0217	Gm33046
Gabra4	1,59	0,97	1,54	0,0009	0,0217	Gabra4
Ak5	0,86	0,27	1,5	0,0009	0,0217	Ak5
Trpv4	5,78	3,93	3,6	0,0010	0,0220	Trpv4
Pbxip1	5,69	4,94	1,68	0,0010	0,0221	Pbxip1
Plxna4	5,01	5,77	-1,69	0,0010	0,0222	Plxna4
Mpeg1	5,64	6,43	-1,72	0,0010	0,0222	Mpeg1
Galnt7	7,13	6,53	1,51	0,0010	0,0224	Galnt7
Anxa2	2,95	0,97	3,95	0,0010	0,0225	Anxa2
Lbh	5,86	4,93	1,91	0,0010	0,0225	Lbh
Arhgap6	2,46	0,49	3,92	0,0010	0,0226	Arhgap6
Arhgap5	7,11	7,74	-1,55	0,0010	0,0226	Arhgap5
Lrig1	3,09	0,67	5,35	0,0010	0,0228	Lrig1
Wtip	4,98	4,15	1,78	0,0010	0,0228	Wtip
Abcc8	1,29	0,38	1,89	0,0010	0,0229	Abcc8
Tfpi	5,74	6,44	-1,63	0,0010	0,0229	Tfpi
Slc4a3	3,23	1,91	2,5	0,0010	0,0231	Slc4a3
Lrfn4	1,66	0,6	2,08	0,0010	0,0231	Lrfn4
Lpin1	6,76	7,46	-1,62	0,0010	0,0231	Lpin1
Gramd4	4,04	5,29	-2,38	0,0010	0,0231	Gramd4
Oas1g	5,41	1,41	16	0,0010	0,0232	Oas1g
Ccr2	3,31	2,01	2,47	0,0010	0,0232	Ccr2
2900005J15Rik	3,86	2,94	1,89	0,0010	0,0233	2900005J15Rik
Parp16	2,25	3,24	-1,99	0,0011	0,0237	Parp16
Cd244	4,08	2,08	3,99	0,0011	0,0238	Cd244
Haao	5,94	4,94	2	0,0011	0,0238	Haao
Timp2	9,62	8,84	1,71	0,0011	0,0238	Timp2
Hlf	1,32	3,95	-6,19	0,0011	0,0238	Hlf
Pten	6,86	7,55	-1,61	0,0011	0,0239	Pten
Otud7a	2,09	1,07	2,02	0,0011	0,0240	Otud7a
Foxn2	5,2	4,23	1,97	0,0011	0,0240	Foxn2
Stab1	10,87	9,94	1,9	0,0011	0,0240	Stab1
Bach2	5,59	6,24	-1,57	0,0011	0,0240	Bach2
Ptprn2	3,5	2,25	2,39	0,0011	0,0241	Ptprn2
Jdp2	5,46	4,32	2,2	0,0011	0,0241	Jdp2
Fam20c	3,09	1,43	3,15	0,0011	0,0242	Fam20c
E2f2	2,62	1,68	1,92	0,0011	0,0242	E2f2
Wnt7b	0,98	0,39	1,51	0,0011	0,0242	Wnt7b
Bmp1	3,43	4,41	-1,97	0,0011	0,0242	Bmp1
Zfp354c	2,79	3,97	-2,26	0,0011	0,0242	Zfp354c
Gm30189	3,4	1,85	2,91	0,0011	0,0243	Gm30189
Efnb2	1,8	3,2	-2,64	0,0011	0,0243	Efnb2
Sqle	3,4	2	2,64	0,0011	0,0244	Sqle
Dennd3	3,77	3,02	1,68	0,0011	0,0244	Dennd3
Sh3d19	2,9	0,65	4,77	0,0011	0,0245	Sh3d19
2310001H17Rik	3,8	1,66	4,41	0,0011	0,0245	2310001H17Rik
Fam19a2	1,69	0,44	2,37	0,0011	0,0245	Fam19a2
Batf2	3,58	1,29	4,89	0,0011	0,0246	Batf2
4930447M23Rik	2,16	2,76	-1,51	0,0011	0,0247	4930447M23Rik
Oas1a	5,83	3,93	3,74	0,0012	0,0250	Oas1a
Asgr2	3,84	2	3,56	0,0012	0,0250	Asgr2
Ahrr	3,43	2,3	2,19	0,0012	0,0250	Ahrr
Tlr1	7,48	6,58	1,86	0,0012	0,0250	Tlr1
Ahnak2	1,32	0,43	1,86	0,0012	0,0250	Ahnak2
Lactb2	3,11	3,93	-1,76	0,0012	0,0250	Lactb2
Srl	3,84	4,75	-1,88	0,0012	0,0250	Srl
H2-K1	11,41	9,66	3,36	0,0012	0,0251	H2-K1
Hivep2	3,5	2,27	2,34	0,0012	0,0251	Hivep2
Adcy9	6,02	5,37	1,57	0,0012	0,0251	Adcy9
Nid2	5,03	6,07	-2,05	0,0012	0,0251	Nid2
LOC102641351	0,34	2,68	-5,06	0,0012	0,0251	LOC102641351
Ptpn5	2,52	1,66	1,83	0,0012	0,0253	Ptpn5
Nphp3	3,95	3,13	1,76	0,0012	0,0253	Nphp3
2610020H08Rik	1,61	1,03	1,5	0,0012	0,0253	2610020H08Rik
Bin2	8,16	8,91	-1,68	0,0012	0,0253	Bin2
6530402F18Rik	5,03	3,85	2,27	0,0012	0,0255	6530402F18Rik
Tub	1,97	1,07	1,87	0,0012	0,0255	Tub
Rhod	0,82	0,11	1,63	0,0012	0,0255	Rhod
Sh2b1	7,8	7,14	1,58	0,0012	0,0255	Sh2b1
Tmem263	0,31	1,35	-2,06	0,0012	0,0255	Tmem263
Slc25a10	5,81	4,7	2,15	0,0012	0,0256	Slc25a10
E2f8	2,42	1,63	1,72	0,0012	0,0256	E2f8
Cd40	5,25	2,04	9,25	0,0012	0,0257	Cd40
Fas	2,36	0,99	2,59	0,0012	0,0257	Fas
Gm2a	7,34	6,65	1,62	0,0012	0,0257	Gm2a
Ulbp1	2,39	1,17	2,34	0,0012	0,0258	Ulbp1
St8sia6	4,43	3,21	2,33	0,0012	0,0258	St8sia6
Cds2	8,69	9,28	-1,5	0,0012	0,0258	Cds2
Sall1	6,96	8,18	-2,33	0,0012	0,0258	Sall1
Plppr2	4,14	2,06	4,23	0,0013	0,0259	Plppr2
Nostrin	2,16	0,11	4,14	0,0013	0,0259	Nostrin
Chst1	6,67	5,35	2,49	0,0012	0,0259	Chst1
Pgap3	3,79	2,85	1,92	0,0013	0,0259	Pgap3
Lmnb1	3,58	2,88	1,63	0,0013	0,0259	Lmnb1
C1qtnf1	2,33	0,35	3,95	0,0013	0,0260	C1qtnf1
Rgs2	9,17	9,77	-1,51	0,0013	0,0260	Rgs2
Syt11	5,78	5,13	1,57	0,0013	0,0261	Syt11
Frat2	2,55	3,31	-1,7	0,0013	0,0262	Frat2
Snta1	4,26	5,4	-2,2	0,0013	0,0262	Snta1
Layn	3,18	4,26	-2,12	0,0013	0,0263	Layn
Slc35e4	3,88	2,86	2,02	0,0013	0,0264	Slc35e4
S1pr1	8,33	7,74	1,51	0,0013	0,0264	S1pr1
Lyz1	2,19	0,24	3,86	0,0013	0,0265	Lyz1
Lrrk2	1,61	0,1	2,84	0,0013	0,0265	Lrrk2
Plcl2	5,38	6,15	-1,7	0,0013	0,0265	Plcl2
L1cam	1,79	1,16	1,54	0,0013	0,0266	L1cam
Rnf217	1,75	0,37	2,61	0,0013	0,0267	Rnf217
Bcl6	6,2	5,23	1,95	0,0013	0,0268	Bcl6
Mta3	7,14	6,44	1,62	0,0013	0,0268	Mta3
Klf12	6,05	6,79	-1,67	0,0013	0,0269	Klf12
Vgf	2,91	1,96	1,94	0,0013	0,0270	Vgf
Evi5	4,64	5,42	-1,71	0,0013	0,0270	Evi5
Arhgap32	2,39	3,74	-2,56	0,0013	0,0270	Arhgap32
Gm14379	1,11	0,11	1,99	0,0013	0,0272	Gm14379
Dock5	1,04	0,21	1,77	0,0014	0,0273	Dock5
Scarb1	5,56	6,36	-1,74	0,0014	0,0273	Scarb1
Cep170b	4,53	2,9	3,11	0,0014	0,0274	Cep170b
Soat2	5,21	3,58	3,09	0,0014	0,0274	Soat2
C5ar1	6,45	5,65	1,74	0,0014	0,0276	C5ar1
Slc8b1	6,89	6,29	1,51	0,0014	0,0276	Slc8b1
Dnajc28	1,65	2,74	-2,13	0,0014	0,0276	Dnajc28
Plau	8,37	7,06	2,49	0,0014	0,0277	Plau
AI662270	2,1	0,79	2,48	0,0014	0,0277	AI662270
Gca	4,06	3,31	1,67	0,0014	0,0279	Gca
Crym	1,55	0,2	2,56	0,0014	0,0280	Crym
Ms4a8a	0,77	0	1,71	0,0014	0,0280	Ms4a8a
Slc46a3	5,66	6,32	-1,58	0,0014	0,0280	Slc46a3
Srgap2	9,41	10,1	-1,6	0,0014	0,0280	Srgap2
Gm6904	3,13	1,66	2,77	0,0014	0,0281	Gm6904
Mtrf1	4,49	3,87	1,54	0,0014	0,0281	Mtrf1
Cbfa2t3	5,37	6,28	-1,88	0,0014	0,0282	Cbfa2t3
Cdkn1c	3,2	4,3	-2,15	0,0014	0,0282	Cdkn1c
Rnf149	5,98	5,19	1,72	0,0014	0,0284	Rnf149
Foxd2	2	1,24	1,7	0,0014	0,0284	Foxd2
Parvb	5,6	4,9	1,62	0,0015	0,0285	Parvb
Rrp1b	5,59	6,28	-1,61	0,0015	0,0285	Rrp1b
LOC102632465	2,96	0,91	4,12	0,0015	0,0287	LOC102632465
Crip1	3,82	2,13	3,23	0,0015	0,0287	Crip1
Scn3b	1,76	0,73	2,05	0,0015	0,0287	Scn3b
Tnip1	7,1	6,15	1,93	0,0015	0,0287	Tnip1
Susd6	7,29	6,66	1,55	0,0015	0,0287	Susd6
Nck1	5,07	5,75	-1,6	0,0015	0,0287	Nck1
Setbp1	1,33	2,52	-2,28	0,0015	0,0287	Setbp1
Syne1	3,93	1,81	4,35	0,0015	0,0288	Syne1
Gaa	8,46	7,85	1,52	0,0015	0,0288	Gaa
Ifi27l2a	4,99	2,88	4,33	0,0015	0,0289	Ifi27l2a
Tfec	2,51	1,61	1,87	0,0015	0,0289	Tfec
Nampt	6	5,25	1,69	0,0015	0,0289	Nampt
Smim1	1,73	2,85	-2,18	0,0015	0,0289	Smim1
Prr5l	5,99	4,75	2,36	0,0015	0,0291	Prr5l
Zfp354a	2,92	4,23	-2,48	0,0015	0,0291	Zfp354a
Tmem132b	2,4	1,69	1,64	0,0015	0,0293	Tmem132b
Mylip	8,19	9	-1,75	0,0015	0,0293	Mylip
Egr1	5,44	3,99	2,72	0,0015	0,0294	Egr1
Tbc1d12	5,23	4,28	1,93	0,0015	0,0295	Tbc1d12
Dgkz	8,51	7,78	1,65	0,0015	0,0295	Dgkz
Fgf11	3,48	5,02	-2,89	0,0015	0,0295	Fgf11
Hcar2	4,2	1,28	7,56	0,0016	0,0296	Hcar2
Plec	3,79	3,1	1,62	0,0016	0,0297	Plec
Sept9	4,41	3,78	1,55	0,0016	0,0297	Sept9
Ifi44	4,5	0,15	20,32	0,0016	0,0298	Ifi44
Hs3st1	2,92	0,4	5,7	0,0016	0,0298	Hs3st1
Tmem231	3,03	2,1	1,9	0,0016	0,0298	Tmem231
Cmya5	1,13	2,24	-2,15	0,0016	0,0299	Cmya5
Scpep1	7,01	6,28	1,66	0,0016	0,0300	Scpep1
Anxa4	6,28	5,52	1,69	0,0016	0,0301	Anxa4
Syne3	0,96	0,21	1,68	0,0016	0,0301	Syne3
Gm30789	3,26	4,73	-2,77	0,0016	0,0301	Gm30789
Tjp3	2,52	0,81	3,26	0,0016	0,0303	Tjp3
Rarg	3,26	1,77	2,79	0,0016	0,0303	Rarg
Dna2	2,92	1,91	2,02	0,0016	0,0303	Dna2
Lrp6	7,41	6,45	1,95	0,0016	0,0303	Lrp6
5031425F14Rik	1,92	1,15	1,71	0,0016	0,0303	5031425F14Rik
Gadd45g	6,2	5,45	1,68	0,0016	0,0303	Gadd45g
Asic4	1,16	0,55	1,53	0,0016	0,0303	Asic4
Cadm1	8,66	8,05	1,53	0,0016	0,0303	Cadm1
Itgax	7,56	5,42	4,42	0,0016	0,0305	Itgax
Dgkb	2,39	1,21	2,25	0,0016	0,0305	Dgkb
Nr3c2	3,05	3,98	-1,9	0,0016	0,0305	Nr3c2
Mmp23	3	3,88	-1,85	0,0017	0,0306	Mmp23
Psen2	6,49	5,76	1,66	0,0017	0,0307	Psen2
Zswim5	1,22	3,17	-3,87	0,0017	0,0310	Zswim5
Anln	3,4	1,66	3,34	0,0017	0,0312	Anln
Eef2k	6,52	7,42	-1,87	0,0017	0,0312	Eef2k
Bcar3	3,48	1,34	4,41	0,0017	0,0314	Bcar3
Lmntd2	1,91	1,11	1,74	0,0017	0,0315	Lmntd2
Sik1	3,48	2,03	2,73	0,0017	0,0316	Sik1
Slfn2	7,1	5,94	2,22	0,0017	0,0316	Slfn2
Ppp2r5b	5,18	4,52	1,57	0,0017	0,0316	Ppp2r5b
Bcl3	5,27	3,39	3,68	0,0017	0,0317	Bcl3
Stim2	5,43	4,71	1,65	0,0018	0,0317	Stim2
LOC108167662	0,21	0,97	-1,69	0,0018	0,0317	LOC108167662
Cmtm6	9,15	9,95	-1,74	0,0017	0,0317	Cmtm6
Strip2	1,32	0,61	1,64	0,0018	0,0318	Strip2
Tspan32	5,79	4,89	1,87	0,0018	0,0319	Tspan32
Ikzf2	1,29	2,01	-1,65	0,0018	0,0319	Ikzf2
Slamf1	3,36	4,11	-1,68	0,0018	0,0321	Slamf1
Pdlim7	4,35	1,92	5,42	0,0018	0,0322	Pdlim7
Creb5	2,31	1,5	1,76	0,0018	0,0322	Creb5
Man1a	6,68	7,3	-1,54	0,0018	0,0322	Man1a
LOC102639543	3,3	0,75	5,84	0,0018	0,0323	LOC102639543
Clec4b1	1,26	0	2,39	0,0018	0,0323	Clec4b1
Hmga2-ps1	6,46	7,23	-1,72	0,0018	0,0323	Hmga2-ps1
LOC108168817	2,26	1,33	1,9	0,0018	0,0328	LOC108168817
Prkx	5,06	5,76	-1,63	0,0018	0,0328	Prkx
H2-D1	10,92	9,34	2,98	0,0019	0,0329	H2-D1
Syt8	1,93	0,74	2,29	0,0019	0,0329	Syt8
Cnot8	7,05	7,68	-1,54	0,0019	0,0329	Cnot8
Bnc2	0,84	1,95	-2,15	0,0019	0,0329	Bnc2
Plekhg3	2,24	0,53	3,27	0,0019	0,0330	Plekhg3
Rbbp8	4,09	3,04	2,07	0,0019	0,0330	Rbbp8
Tbc1d4	3,74	4,55	-1,75	0,0019	0,0330	Tbc1d4
Sdk1	4,91	6,04	-2,18	0,0019	0,0333	Sdk1
Fam234a	6,09	5,13	1,94	0,0019	0,0334	Fam234a
Usp13	0,93	0,1	1,77	0,0019	0,0334	Usp13
Mfsd7a	5,2	4,4	1,75	0,0019	0,0334	Mfsd7a
Rhbdf2	6,88	6,23	1,57	0,0019	0,0334	Rhbdf2
Tal1	4,94	5,59	-1,57	0,0019	0,0334	Tal1
Fam72a	2,83	3,5	-1,59	0,0019	0,0334	Fam72a
Ggps1	6,24	6,99	-1,68	0,0019	0,0334	Ggps1
Zcwpw1	2,43	3,39	-1,94	0,0019	0,0334	Zcwpw1
Siglecg	0,89	1,98	-2,12	0,0019	0,0334	Siglecg
Postn	1,12	2,29	-2,24	0,0019	0,0334	Postn
Fcgr4	6,01	4,33	3,2	0,0019	0,0335	Fcgr4
Cbr2	3,02	1,46	2,96	0,0019	0,0335	Cbr2
Arl5c	6,61	4,78	3,55	0,0020	0,0336	Arl5c
Dock6	4,89	4,1	1,73	0,0020	0,0340	Dock6
Ifit2	2,09	1,46	1,56	0,0020	0,0341	Ifit2
Mob3b	2,61	0,68	3,8	0,0020	0,0343	Mob3b
H2-Q5	7,19	5,32	3,65	0,0020	0,0343	H2-Q5
Flt1	2,03	0,99	2,05	0,0020	0,0343	Flt1
Svop	1,91	1,02	1,86	0,0020	0,0343	Svop
Chrna4	1,68	0,8	1,84	0,0020	0,0343	Chrna4
Sesn1	7,59	6,97	1,53	0,0020	0,0343	Sesn1
Fkbp7	3,45	4,19	-1,67	0,0020	0,0343	Fkbp7
N4bp3	2,27	0,76	2,85	0,0020	0,0345	N4bp3
Znrf3	5,45	4,55	1,86	0,0020	0,0345	Znrf3
Myo16	1,3	0,54	1,69	0,0020	0,0345	Myo16
Tpbgl	5,52	6,67	-2,22	0,0020	0,0345	Tpbgl
Csmd1	1,86	0,68	2,27	0,0021	0,0346	Csmd1
Slc22a18	1,67	0,62	2,08	0,0021	0,0346	Slc22a18
Sft2d2	9,25	9,96	-1,64	0,0021	0,0346	Sft2d2
LOC102638940	1,76	1,1	1,58	0,0021	0,0347	LOC102638940
Ift43	2,47	1,85	1,53	0,0021	0,0347	Ift43
Tbx19	0,81	2,43	-3,07	0,0021	0,0347	Tbx19
Plk3	6,87	5,32	2,91	0,0021	0,0348	Plk3
Asb10	3,89	4,76	-1,83	0,0021	0,0348	Asb10
Lrtm2	2,21	1,13	2,11	0,0021	0,0349	Lrtm2
Pgap1	3,75	2,38	2,59	0,0021	0,0350	Pgap1
Synj2	7,04	6,11	1,91	0,0021	0,0350	Synj2
Sdr39u1	2,19	1,55	1,56	0,0021	0,0350	Sdr39u1
Nradd	4,14	4,88	-1,67	0,0021	0,0350	Nradd
Endou	0,68	0	1,6	0,0021	0,0352	Endou
Csnk1e	6,05	6,76	-1,64	0,0021	0,0353	Csnk1e
Tnfaip2	6,61	5,71	1,87	0,0021	0,0354	Tnfaip2
Tec	6,69	6,06	1,54	0,0021	0,0354	Tec
Exog	4,38	5,16	-1,71	0,0022	0,0354	Exog
Fam171a1	0,79	1,69	-1,87	0,0021	0,0354	Fam171a1
Atp6v0a2	6,83	7,78	-1,94	0,0022	0,0355	Atp6v0a2
Ccdc171	1,77	1,16	1,53	0,0022	0,0360	Ccdc171
Sstr4	2,39	1,15	2,37	0,0022	0,0361	Sstr4
Col4a1	1,44	0,61	1,78	0,0022	0,0361	Col4a1
Afap1l1	6,14	7,19	-2,07	0,0022	0,0361	Afap1l1
Ptger2	1,17	0,11	2,09	0,0023	0,0366	Ptger2
Creb3l2	5,75	6,47	-1,65	0,0023	0,0366	Creb3l2
Rpgrip1	1,06	0,35	1,63	0,0023	0,0369	Rpgrip1
Ptprj	9,27	8,68	1,5	0,0023	0,0372	Ptprj
Iffo1	8,43	9,14	-1,64	0,0023	0,0373	Iffo1
2700081O15Rik	3,56	4,4	-1,79	0,0023	0,0373	2700081O15Rik
Phlda3	2,34	0,6	3,33	0,0023	0,0376	Phlda3
Tmcc2	4,18	2,95	2,35	0,0023	0,0376	Tmcc2
Habp4	4,44	3,66	1,72	0,0023	0,0376	Habp4
Rnase2a	0,65	0	1,57	0,0023	0,0376	Rnase2a
Slc5a5	0,67	1,74	-2,09	0,0023	0,0376	Slc5a5
Ptpn7	2,23	0,78	2,73	0,0024	0,0378	Ptpn7
Ttyh2	5,64	4,9	1,67	0,0024	0,0378	Ttyh2
Stk17b	5,8	5,19	1,53	0,0024	0,0378	Stk17b
Fzd8	0,21	0,85	-1,56	0,0024	0,0378	Fzd8
Resp18	1,22	0,52	1,64	0,0024	0,0380	Resp18
Eif4g2	7,9	8,51	-1,53	0,0024	0,0380	Eif4g2
Zbtb16	2,56	0,6	3,9	0,0024	0,0381	Zbtb16
Kcnd1	7,05	7,91	-1,83	0,0024	0,0382	Kcnd1
Oas2	7,59	2,98	24,43	0,0024	0,0387	Oas2
Sh3bgrl	4,46	2,94	2,86	0,0024	0,0387	Sh3bgrl
Irs2	6,3	5,21	2,14	0,0024	0,0387	Irs2
Adamtsl2	2,72	3,74	-2,04	0,0024	0,0387	Adamtsl2
Irak3	4,46	3,46	1,99	0,0025	0,0388	Irak3
Mocos	1,34	0,2	2,2	0,0025	0,0389	Mocos
Tmem106a	5,2	4,46	1,67	0,0025	0,0389	Tmem106a
Nbea	4,34	5,04	-1,62	0,0025	0,0389	Nbea
Unc5cl	1,92	3,26	-2,52	0,0025	0,0389	Unc5cl
Lgi4	3,28	4,84	-2,96	0,0025	0,0389	Lgi4
Cd300lb	2,3	1,29	2,02	0,0025	0,0390	Cd300lb
9330179D12Rik	0,69	0	1,61	0,0025	0,0390	9330179D12Rik
Aim1	1,86	1,2	1,58	0,0025	0,0391	Aim1
Mertk	7,04	7,69	-1,58	0,0025	0,0392	Mertk
Cdr2	2,84	1,47	2,59	0,0025	0,0393	Cdr2
Klra17	0,59	0	1,51	0,0025	0,0393	Klra17
Hoxb4	4,45	3,23	2,33	0,0025	0,0394	Hoxb4
Galm	4,51	5,28	-1,71	0,0025	0,0395	Galm
Zfp57	0,56	1,54	-1,98	0,0025	0,0395	Zfp57
Neurl1b	4,44	3,32	2,18	0,0025	0,0396	Neurl1b
Rhoq	6,48	7,22	-1,67	0,0026	0,0396	Rhoq
Lbx2	0,66	1,43	-1,71	0,0026	0,0396	Lbx2
Lrig3	4,01	4,82	-1,76	0,0026	0,0397	Lrig3
Zfyve9	3,08	3,8	-1,65	0,0026	0,0401	Zfyve9
Bahcc1	3,68	4,86	-2,28	0,0026	0,0401	Bahcc1
Elavl4	2,55	4,12	-2,96	0,0026	0,0401	Elavl4
Gpr132	2,64	0,24	5,25	0,0026	0,0402	Gpr132
Diaph1	7,37	6,31	2,09	0,0026	0,0402	Diaph1
Nrp1	7,67	6,65	2,02	0,0026	0,0402	Nrp1
Atad2	3,3	2,37	1,9	0,0026	0,0402	Atad2
Plekho1	8,84	9,43	-1,51	0,0026	0,0402	Plekho1
2610528A11Rik	2,78	3,52	-1,67	0,0026	0,0403	2610528A11Rik
Vangl2	4,05	4,94	-1,85	0,0026	0,0404	Vangl2
Il10	0,97	0	1,96	0,0026	0,0405	Il10
Marveld2	2,46	3,37	-1,88	0,0026	0,0405	Marveld2
Cpox	4,54	5,14	-1,51	0,0027	0,0409	Cpox
Raet1d	0,72	0	1,65	0,0027	0,0410	Raet1d
Atp2a3	4,79	4,07	1,66	0,0027	0,0411	Atp2a3
Fam102b	8,27	8,89	-1,54	0,0027	0,0411	Fam102b
Fkbp11	0,37	1,04	-1,6	0,0027	0,0411	Fkbp11
Man1a2	6,23	6,86	-1,55	0,0027	0,0412	Man1a2
Tspan13	5,67	6,55	-1,83	0,0027	0,0412	Tspan13
Col27a1	5,81	7,03	-2,33	0,0027	0,0413	Col27a1
Cox6a2	3,48	2,31	2,25	0,0027	0,0414	Cox6a2
Arl15	4,18	4,79	-1,53	0,0027	0,0414	Arl15
Itgb3	5,72	6,67	-1,93	0,0027	0,0414	Itgb3
Nt5e	2,24	0,33	3,74	0,0028	0,0418	Nt5e
Gria4	2,11	1,35	1,7	0,0028	0,0418	Gria4
Gem	1,34	2,28	-1,91	0,0028	0,0418	Gem
Gm34483	1,17	0,11	2,08	0,0028	0,0419	Gm34483
Gclc	5,77	6,43	-1,58	0,0028	0,0423	Gclc
Cfh	9,95	10,66	-1,63	0,0028	0,0423	Cfh
Rgs11	2,94	1,3	3,11	0,0028	0,0425	Rgs11
Tmem132a	4,85	4,03	1,76	0,0028	0,0425	Tmem132a
Iqch	0,11	1,14	-2,04	0,0028	0,0425	Iqch
Nrros	4,97	4,11	1,82	0,0029	0,0426	Nrros
Shb	4	4,6	-1,52	0,0029	0,0426	Shb
Dennd4a	6,96	7,77	-1,75	0,0029	0,0426	Dennd4a
Klf15	0,21	1,01	-1,75	0,0029	0,0427	Klf15
Fam131b	2,42	1,2	2,33	0,0029	0,0430	Fam131b
Eif4ebp1	5,04	4,11	1,91	0,0029	0,0430	Eif4ebp1
Med12l	4,61	5,34	-1,65	0,0029	0,0430	Med12l
Acvr2b	5,27	6,06	-1,72	0,0029	0,0430	Acvr2b
Myo6	2,81	4,45	-3,12	0,0029	0,0430	Myo6
Gpnmb	2,07	0,1	3,92	0,0029	0,0431	Gpnmb
Ahnak	2,34	0,4	3,85	0,0029	0,0432	Ahnak
Cep128	3,7	2,62	2,11	0,0029	0,0432	Cep128
Sparc	11,32	12,4	-2,12	0,0030	0,0433	Sparc
Mlxipl	8,26	9,15	-1,84	0,0030	0,0434	Mlxipl
Racgap1	4,42	3,7	1,64	0,0030	0,0435	Racgap1
Marcksl1	3,19	2,27	1,9	0,0030	0,0437	Marcksl1
Smyd2	3,81	3,19	1,54	0,0030	0,0437	Smyd2
Akirin2	7,37	8,11	-1,67	0,0030	0,0437	Akirin2
LOC105246961	2,96	3,73	-1,7	0,0030	0,0437	LOC105246961
Cyth1	6,53	5,67	1,81	0,0030	0,0438	Cyth1
Tmod3	3,79	4,38	-1,51	0,0030	0,0438	Tmod3
Ccl8	1,72	0	3,3	0,0030	0,0439	Ccl8
F730043M19Rik	3,17	1,99	2,27	0,0030	0,0441	F730043M19Rik
Bmi1	4,55	5,22	-1,59	0,0031	0,0445	Bmi1
LOC102637283	0,8	0	1,74	0,0031	0,0449	LOC102637283
Vps13c	5,79	5,05	1,67	0,0031	0,0449	Vps13c
Glul	8,49	9,14	-1,57	0,0031	0,0449	Glul
Dnaja4	2,9	3,97	-2,1	0,0031	0,0449	Dnaja4
Atcay	2,12	1,43	1,61	0,0031	0,0450	Atcay
Pkp4	4,83	5,5	-1,59	0,0031	0,0450	Pkp4
Eepd1	5,25	6,17	-1,88	0,0031	0,0451	Eepd1
Pear1	5,12	5,71	-1,51	0,0031	0,0453	Pear1
Tanc2	10,08	10,75	-1,59	0,0031	0,0454	Tanc2
Ccl12	8,59	5,94	6,28	0,0032	0,0456	Ccl12
Rcor2	1,83	0,69	2,21	0,0032	0,0456	Rcor2
Zfp354b	2,19	3,29	-2,15	0,0032	0,0456	Zfp354b
LOC108167986	0,11	1,03	-1,89	0,0032	0,0457	LOC108167986
Tnik	3,6	1,53	4,21	0,0032	0,0459	Tnik
Mmp13	0,8	0	1,74	0,0032	0,0460	Mmp13
Bckdha	7,09	7,68	-1,51	0,0032	0,0460	Bckdha
Dnase1l3	2,19	0,73	2,75	0,0032	0,0462	Dnase1l3
Ccl6	6,68	7,38	-1,63	0,0032	0,0462	Ccl6
Duoxa1	2,23	3,64	-2,65	0,0033	0,0463	Duoxa1
A330023F24Rik	3,34	2,49	1,8	0,0033	0,0467	A330023F24Rik
Me3	0,9	0,29	1,53	0,0033	0,0467	Me3
Ric3	4,28	5,12	-1,79	0,0033	0,0469	Ric3
Unc13a	2,91	1,73	2,26	0,0033	0,0470	Unc13a
Flot2	6,15	5,55	1,51	0,0033	0,0470	Flot2
Fbxw17	3,88	2,08	3,47	0,0034	0,0471	Fbxw17
Rilpl1	6,53	7,42	-1,85	0,0034	0,0471	Rilpl1
LOC108167784	1,48	0,47	2,02	0,0034	0,0472	LOC108167784
Gspt1	6,83	7,72	-1,85	0,0034	0,0475	Gspt1
Chac1	2,86	0,6	4,79	0,0034	0,0478	Chac1
Nrep	2,52	4,09	-2,97	0,0034	0,0479	Nrep
Dck	4,56	3,71	1,8	0,0034	0,0480	Dck
Dok3	8,43	7,72	1,64	0,0035	0,0481	Dok3
Zfp462	1,16	0,48	1,61	0,0035	0,0481	Zfp462
Cdc42ep1	0,31	1,69	-2,61	0,0034	0,0481	Cdc42ep1
Ppp1r1a	1,27	0,22	2,07	0,0035	0,0483	Ppp1r1a
Wscd2	2,92	1,9	2,02	0,0035	0,0483	Wscd2
Akr1c12	0,63	0	1,55	0,0035	0,0485	Akr1c12
Fcna	1,05	0,44	1,53	0,0035	0,0486	Fcna
Plxdc2	10,14	10,86	-1,64	0,0035	0,0489	Plxdc2
2500002B13Rik	3,16	1,7	2,75	0,0036	0,0491	2500002B13Rik
Dclk1	1,78	1,04	1,66	0,0036	0,0491	Dclk1
Cdca7l	3	1,45	2,92	0,0036	0,0497	Cdca7l
Acot9	5,81	4,96	1,8	0,0036	0,0497	Acot9
Bambi	2,18	1,53	1,58	0,0036	0,0497	Bambi
Agrn	3,6	2,97	1,54	0,0036	0,0497	Agrn
Bcat1	1,29	1,98	-1,62	0,0036	0,0497	Bcat1
Tspan18	3,97	4,97	-2	0,0036	0,0497	Tspan18
Trim59	2,96	1,26	3,25	0,0036	0,0498	Trim59
Cxcl2	1,04	0	2,06	0,0036	0,0498	Cxcl2
1110008P14Rik	2,22	1,37	1,81	0,0037	0,0498	1110008P14Rik
Ms4a4b	0,94	0,11	1,78	0,0036	0,0498	Ms4a4b
A230056P14Rik	1,66	2,5	-1,79	0,0036	0,0498	A230056P14Rik
Icos	1,58	2,85	-2,4	0,0036	0,0498	Icos
Ctsd	15,16	14,45	1,64	0,0037	0,0499	Ctsd
Ackr3	0,65	2,03	-2,6	0,0037	0,0502	Ackr3
Soat1	6,25	5,51	1,67	0,0037	0,0504	Soat1
Bst1	3,36	0,73	6,23	0,0038	0,0507	Bst1
Pparg	1,09	0	2,13	0,0038	0,0507	Pparg
St7	4,63	3,57	2,08	0,0037	0,0507	St7
Dscaml1	2,13	1,51	1,54	0,0038	0,0507	Dscaml1
Ier3	2,55	1,44	2,17	0,0038	0,0508	Ier3
Slc15a3	8,5	7,59	1,89	0,0038	0,0508	Slc15a3
4933412E12Rik	2,8	3,56	-1,68	0,0038	0,0508	4933412E12Rik
Pydc4	6,01	1,52	22,41	0,0038	0,0509	Pydc4
Dhx58	6,23	5,4	1,78	0,0038	0,0509	Dhx58
Mex3d	4,77	5,36	-1,5	0,0038	0,0509	Mex3d
Fzd4	5,63	6,25	-1,53	0,0038	0,0509	Fzd4
Fuk	2,93	3,6	-1,59	0,0038	0,0509	Fuk
Ptpn14	0,09	1,24	-2,22	0,0038	0,0509	Ptpn14
Lgals3	3,17	1,21	3,91	0,0038	0,0510	Lgals3
Enpp4	6,26	5,28	1,98	0,0038	0,0510	Enpp4
Mmp25	2,72	0,96	3,39	0,0038	0,0511	Mmp25
Mras	5	6,04	-2,05	0,0038	0,0511	Mras
Nlgn1	1,69	0,75	1,93	0,0038	0,0512	Nlgn1
Tpd52	7,97	7,3	1,59	0,0038	0,0512	Tpd52
Il1b	4,43	2,4	4,08	0,0039	0,0513	Il1b
Rab36	3,09	1,71	2,61	0,0039	0,0513	Rab36
Insig1	4,63	3,91	1,64	0,0039	0,0513	Insig1
Cdc42bpa	2,64	3,32	-1,61	0,0039	0,0514	Cdc42bpa
Nrbp2	4,75	3,18	2,96	0,0039	0,0515	Nrbp2
Piwil2	1,65	0,41	2,36	0,0039	0,0515	Piwil2
Gm20324	1,96	1,12	1,79	0,0039	0,0515	Gm20324
Plekhg5	5,06	4,27	1,73	0,0039	0,0515	Plekhg5
Hsf4	1,95	0,31	3,1	0,0039	0,0518	Hsf4
Relb	1,66	0,8	1,82	0,0040	0,0521	Relb
Batf	3,33	2,53	1,73	0,0040	0,0526	Batf
Natd1	5,46	6,12	-1,59	0,0040	0,0527	Natd1
Maged2	2,99	3,83	-1,79	0,0040	0,0527	Maged2
Cnksr2	2,36	1,4	1,95	0,0040	0,0528	Cnksr2
Pcdh1	3,33	2,64	1,61	0,0041	0,0531	Pcdh1
Lsamp	3,02	2,19	1,79	0,0041	0,0534	Lsamp
Ndst1	6,6	5,98	1,54	0,0041	0,0535	Ndst1
Chpf	2,61	1,33	2,43	0,0041	0,0537	Chpf
Pqlc3	3,84	2,55	2,44	0,0041	0,0538	Pqlc3
Slc6a9	4	3,17	1,78	0,0041	0,0538	Slc6a9
Klhl13	3,56	2,94	1,54	0,0041	0,0538	Klhl13
LOC105246186	1,07	0	2,09	0,0042	0,0539	LOC105246186
Ntrk3	3,35	2,6	1,68	0,0042	0,0539	Ntrk3
Rgs14	5,45	4,84	1,53	0,0042	0,0539	Rgs14
Rassf3	5,29	4,36	1,91	0,0042	0,0542	Rassf3
Akap10	5,68	5,07	1,53	0,0042	0,0542	Akap10
Pstpip2	3,1	1,69	2,67	0,0042	0,0544	Pstpip2
Dclre1c	7,7	7,11	1,51	0,0042	0,0544	Dclre1c
S1pr4	3,72	4,42	-1,62	0,0042	0,0544	S1pr4
Ocln	2,03	3,05	-2,03	0,0042	0,0544	Ocln
Cercam	4,04	3	2,06	0,0043	0,0547	Cercam
Dscam	1,1	0,44	1,58	0,0043	0,0547	Dscam
Eps8	3,77	2,16	3,04	0,0043	0,0549	Eps8
Athl1	4,65	3,69	1,94	0,0043	0,0549	Athl1
Wdr78	0,55	1,16	-1,53	0,0043	0,0550	Wdr78
Msrb2	5,47	6,26	-1,73	0,0043	0,0550	Msrb2
Mmgt1	4,47	5,19	-1,65	0,0043	0,0552	Mmgt1
Ccdc8	2,71	3,71	-1,99	0,0044	0,0556	Ccdc8
Tmem123	7,98	7,36	1,54	0,0044	0,0562	Tmem123
Stard10	1,75	0,58	2,26	0,0044	0,0563	Stard10
Car11	3,7	2,97	1,65	0,0045	0,0566	Car11
Dapk1	5,81	5,07	1,67	0,0045	0,0569	Dapk1
Tor3a	6,74	6,07	1,59	0,0045	0,0569	Tor3a
Coro6	4,2	3,06	2,21	0,0045	0,0570	Coro6
Klhl36	5,25	5,89	-1,56	0,0045	0,0570	Klhl36
Dgat2	2,13	0,86	2,41	0,0045	0,0571	Dgat2
Tm4sf19	1,24	0,11	2,19	0,0045	0,0571	Tm4sf19
Smc4	3,68	2,83	1,8	0,0045	0,0571	Smc4
4933432I03Rik	0,87	0,11	1,7	0,0045	0,0571	4933432I03Rik
Nudt12	0,91	2,07	-2,23	0,0045	0,0571	Nudt12
Smco4	2,52	1,69	1,77	0,0045	0,0572	Smco4
Prkcq	1,64	2,36	-1,65	0,0046	0,0578	Prkcq
Mir8120	1,35	0,19	2,23	0,0046	0,0580	Mir8120
Asns	2,37	1,05	2,5	0,0046	0,0581	Asns
Srxn1	2,39	1,39	2	0,0047	0,0583	Srxn1
4933421O10Rik	2,55	3,22	-1,6	0,0047	0,0583	4933421O10Rik
Gm16702	0,96	1,76	-1,74	0,0047	0,0583	Gm16702
Slc26a10	1,61	0,67	1,91	0,0047	0,0584	Slc26a10
Rbms1	4,88	4,08	1,74	0,0047	0,0584	Rbms1
Rapgef3	1,78	0,82	1,94	0,0047	0,0586	Rapgef3
Npr2	2,33	1,39	1,91	0,0047	0,0586	Npr2
Bend5	1,4	2,71	-2,49	0,0047	0,0587	Bend5
Pvt1	5,75	4,51	2,36	0,0047	0,0588	Pvt1
Prps2	5,1	5,77	-1,59	0,0048	0,0588	Prps2
2810025M15Rik	4,54	5,25	-1,64	0,0047	0,0588	2810025M15Rik
Arap2	3,03	3,82	-1,73	0,0047	0,0588	Arap2
Fbxl2	1,84	0,56	2,42	0,0048	0,0589	Fbxl2
Cd83	5,43	4,35	2,12	0,0048	0,0589	Cd83
Ly6h	2,27	1,52	1,67	0,0048	0,0589	Ly6h
Nrgn	2,51	1,84	1,59	0,0048	0,0589	Nrgn
Add3	6,38	7,31	-1,9	0,0048	0,0589	Add3
Gm12250	6,37	5,33	2,05	0,0048	0,0591	Gm12250
Oasl1	4,12	1,07	8,27	0,0048	0,0592	Oasl1
Nmi	4,13	4,75	-1,53	0,0048	0,0593	Nmi
Zfp37	1,86	3,06	-2,3	0,0048	0,0593	Zfp37
LOC108168196	1,33	0,2	2,2	0,0049	0,0594	LOC108168196
Irak1bp1	2,52	1,72	1,73	0,0049	0,0594	Irak1bp1
Plppr4	2,63	1,94	1,62	0,0049	0,0594	Plppr4
Hpgds	8,91	9,53	-1,54	0,0049	0,0594	Hpgds
Hk1	3,98	4,63	-1,56	0,0049	0,0594	Hk1
Oxct1	5,96	6,65	-1,62	0,0049	0,0594	Oxct1
Fhit	4,2	4,99	-1,73	0,0049	0,0594	Fhit
Tank	6,12	5,29	1,79	0,0050	0,0601	Tank
Picalm	6,86	8,07	-2,32	0,0050	0,0601	Picalm
Plpp1	6,08	7,13	-2,07	0,0050	0,0602	Plpp1
Gm14005	3,62	2,91	1,64	0,0050	0,0603	Gm14005
Fam135b	1,63	0,72	1,87	0,0050	0,0604	Fam135b
Fn1	1,35	0,55	1,75	0,0050	0,0604	Fn1
Ntrk2	3,89	2,64	2,37	0,0050	0,0607	Ntrk2
Stk39	2,47	1,06	2,66	0,0051	0,0608	Stk39
Rdh12	0,28	1,14	-1,82	0,0050	0,0608	Rdh12
Kcnd2	2,86	2,22	1,56	0,0052	0,0618	Kcnd2
Pnkd	2,94	2,11	1,78	0,0052	0,0619	Pnkd
Mapk12	0,11	0,77	-1,59	0,0052	0,0619	Mapk12
Flnb	4,51	5,27	-1,69	0,0052	0,0619	Flnb
Efcab6	0,28	1,16	-1,84	0,0052	0,0619	Efcab6
Syt6	2,93	1,96	1,96	0,0052	0,0620	Syt6
Kif27	2,3	0,77	2,89	0,0052	0,0622	Kif27
Gdap10	5,42	4,41	2,01	0,0053	0,0627	Gdap10
Ndst3	1,47	0,6	1,82	0,0053	0,0628	Ndst3
Mettl7a1	4,83	5,64	-1,75	0,0053	0,0629	Mettl7a1
Chl1	3,26	2,41	1,8	0,0053	0,0630	Chl1
Fras1	1,72	0,67	2,08	0,0053	0,0632	Fras1
Nfkbia	8,25	7,5	1,68	0,0053	0,0632	Nfkbia
H2-Q7	5,61	2,67	7,69	0,0054	0,0635	H2-Q7
St3gal6	8,16	8,86	-1,62	0,0054	0,0639	St3gal6
Diaph3	1,54	0,68	1,81	0,0054	0,0640	Diaph3
Adgre5	4,52	3,74	1,71	0,0054	0,0640	Adgre5
Hcst	4,82	4,2	1,54	0,0055	0,0642	Hcst
Celf3	3,84	2,15	3,24	0,0055	0,0643	Celf3
Sv2a	4,78	5,46	-1,6	0,0055	0,0643	Sv2a
Slc24a3	5,14	6,17	-2,04	0,0055	0,0643	Slc24a3
Adgrb2	3,79	2,85	1,91	0,0055	0,0648	Adgrb2
Arrdc2	5,17	4,58	1,51	0,0055	0,0649	Arrdc2
Gabbr2	4,73	3,07	3,15	0,0056	0,0651	Gabbr2
Pid1	4,86	4,19	1,6	0,0056	0,0651	Pid1
Gad1	2,25	1,42	1,78	0,0056	0,0653	Gad1
Zfp704	5,32	4,26	2,09	0,0057	0,0659	Zfp704
Sez6l2	4,72	4,12	1,51	0,0057	0,0659	Sez6l2
Nxpe3	3,63	4,25	-1,54	0,0057	0,0659	Nxpe3
Kirrel3	1,9	1,04	1,82	0,0057	0,0661	Kirrel3
Nyap2	2,86	1,73	2,2	0,0057	0,0662	Nyap2
Cd5l	2,13	1,05	2,12	0,0057	0,0662	Cd5l
Zfp810	5,19	4,19	2	0,0057	0,0662	Zfp810
Taf1b	5,91	5,21	1,63	0,0057	0,0662	Taf1b
Gm4951	0,8	0,11	1,61	0,0057	0,0662	Gm4951
Morn1	2,74	2,09	1,58	0,0057	0,0662	Morn1
Aph1c	3,65	2,12	2,9	0,0058	0,0667	Aph1c
Map3k5	5,46	4,75	1,63	0,0058	0,0667	Map3k5
Slc6a1	4,26	3,68	1,5	0,0058	0,0667	Slc6a1
Fkbp9	4,22	4,86	-1,55	0,0058	0,0667	Fkbp9
Lemd3	4,45	5,36	-1,89	0,0058	0,0667	Lemd3
Stradb	2,73	3,76	-2,03	0,0058	0,0667	Stradb
Eid2	2,21	3,54	-2,52	0,0058	0,0667	Eid2
Gm32633	1,1	0,44	1,58	0,0058	0,0668	Gm32633
Ctnnd2	2,96	4,07	-2,17	0,0058	0,0668	Ctnnd2
Zbp1	4,54	2,13	5,34	0,0059	0,0670	Zbp1
Disp2	3,18	2,07	2,16	0,0059	0,0670	Disp2
Wwtr1	2,27	1,41	1,81	0,0059	0,0670	Wwtr1
4931428F04Rik	2,04	1,21	1,78	0,0059	0,0670	4931428F04Rik
Rxfp1	0	0,68	-1,6	0,0059	0,0670	Rxfp1
Zfp358	5,58	6,35	-1,7	0,0059	0,0670	Zfp358
Epb41l3	5,49	4,87	1,53	0,0059	0,0671	Epb41l3
Gramd3	2,91	2,08	1,77	0,0059	0,0672	Gramd3
Retsat	4,91	4,3	1,52	0,0059	0,0672	Retsat
Cdk5rap3	4,31	4,98	-1,59	0,0059	0,0672	Cdk5rap3
Ddx26b	6,2	7	-1,74	0,0059	0,0672	Ddx26b
Slc25a45	7,79	8,39	-1,51	0,0060	0,0673	Slc25a45
Crlf2	7,07	6,16	1,88	0,0060	0,0678	Crlf2
Cep85l	5,07	5,77	-1,62	0,0060	0,0678	Cep85l
Snx10	5,6	6,25	-1,57	0,0060	0,0679	Snx10
Vash1	4,49	5,17	-1,61	0,0061	0,0681	Vash1
H2-Q6	8	4,98	8,11	0,0061	0,0682	H2-Q6
Lrp8	3,21	1,42	3,47	0,0061	0,0682	Lrp8
Tmem59l	3,14	2,48	1,59	0,0061	0,0682	Tmem59l
Klk8	5,25	6,13	-1,84	0,0061	0,0682	Klk8
Lhpp	4,12	3,37	1,69	0,0062	0,0687	Lhpp
Gdf15	1,38	0,69	1,61	0,0062	0,0689	Gdf15
Utp6	2,51	3,71	-2,28	0,0062	0,0689	Utp6
Gm35522	4,15	2,44	3,26	0,0062	0,0691	Gm35522
Lgals3bp	10,17	9,11	2,08	0,0062	0,0691	Lgals3bp
Naaa	5,06	5,7	-1,56	0,0062	0,0692	Naaa
Slc36a2	1	2,72	-3,31	0,0062	0,0693	Slc36a2
Rap1gap	1,33	0,73	1,51	0,0063	0,0694	Rap1gap
Emb	2,44	0,4	4,13	0,0063	0,0697	Emb
Ly9	4,97	3,37	3,03	0,0063	0,0698	Ly9
Olfr98	1,83	0,1	3,32	0,0064	0,0701	Olfr98
B4galnt4	3,78	2,17	3,05	0,0064	0,0701	B4galnt4
Lncpint	3,35	2,39	1,94	0,0063	0,0701	Lncpint
Dok2	1,98	0,77	2,33	0,0064	0,0702	Dok2
Slc22a15	1,04	0,22	1,77	0,0064	0,0705	Slc22a15
Bex2	2,72	2,05	1,59	0,0064	0,0705	Bex2
Hcfc2	4,11	4,73	-1,54	0,0064	0,0705	Hcfc2
Sh2d5	1,6	2,49	-1,85	0,0064	0,0705	Sh2d5
Cst7	3,96	1,97	4	0,0065	0,0706	Cst7
Mmp2	5,61	4,83	1,72	0,0065	0,0706	Mmp2
Pld1	8,05	8,66	-1,53	0,0065	0,0706	Pld1
Stk26	0,7	2,14	-2,72	0,0065	0,0707	Stk26
Fam49a	5,92	5,18	1,67	0,0065	0,0708	Fam49a
Akr1c13	2,18	1,03	2,21	0,0065	0,0709	Akr1c13
Ncapg2	2,29	1,43	1,81	0,0065	0,0709	Ncapg2
Grid2ip	1,14	0,54	1,52	0,0065	0,0709	Grid2ip
Gm11827	0,24	0,91	-1,59	0,0066	0,0715	Gm11827
Fkbp1b	2,1	1,4	1,62	0,0066	0,0716	Fkbp1b
Mab21l3	0,71	0	1,63	0,0066	0,0718	Mab21l3
Maml3	5,75	6,65	-1,87	0,0066	0,0718	Maml3
St3gal2	5,86	6,88	-2,03	0,0066	0,0718	St3gal2
Kcnn1	2,29	1,49	1,74	0,0067	0,0719	Kcnn1
1700003E16Rik	2,61	1,06	2,92	0,0067	0,0721	1700003E16Rik
Tlr11	2,03	1,12	1,87	0,0067	0,0721	Tlr11
Neo1	3,09	3,81	-1,64	0,0067	0,0721	Neo1
Tk1	3,47	1,63	3,58	0,0067	0,0722	Tk1
Slc35d2	3,82	3,23	1,5	0,0067	0,0722	Slc35d2
Acy1	4,75	5,48	-1,67	0,0067	0,0722	Acy1
C2	1,67	0,65	2,03	0,0068	0,0726	C2
Kcnh3	1,4	0,63	1,71	0,0068	0,0727	Kcnh3
Hacd2	5,98	5,34	1,56	0,0068	0,0728	Hacd2
9330159F19Rik	1,96	1,14	1,76	0,0068	0,0729	9330159F19Rik
Slc5a6	5,02	4,38	1,55	0,0068	0,0730	Slc5a6
6030443J06Rik	1,63	0,54	2,14	0,0069	0,0732	6030443J06Rik
Ypel4	0,94	0,1	1,79	0,0069	0,0733	Ypel4
S100a1	2,59	1,65	1,91	0,0069	0,0738	S100a1
Mapt	2,99	1,37	3,08	0,0069	0,0739	Mapt
Acod1	2,06	0,44	3,07	0,0070	0,0739	Acod1
Vangl1	1,33	3,02	-3,23	0,0070	0,0741	Vangl1
Cdkl4	1,24	1,9	-1,58	0,0070	0,0744	Cdkl4
Amotl1	3,59	4,28	-1,61	0,0070	0,0744	Amotl1
Cpne6	2,3	0,53	3,43	0,0071	0,0747	Cpne6
Anxa9	3,64	2,85	1,72	0,0071	0,0749	Anxa9
Iqcg	1,5	0,59	1,89	0,0071	0,0750	Iqcg
Rab13	1,46	0,79	1,59	0,0071	0,0750	Rab13
Shmt1	2,5	3,27	-1,71	0,0071	0,0750	Shmt1
Narf	5,28	6,23	-1,94	0,0071	0,0750	Narf
Wdr31	2	0,99	2,01	0,0072	0,0754	Wdr31
Mansc1	0,93	0,22	1,65	0,0072	0,0755	Mansc1
Slc4a8	2	1,13	1,82	0,0072	0,0757	Slc4a8
Cd24a	1,38	0,63	1,68	0,0072	0,0757	Cd24a
Spred2	6,13	5,49	1,55	0,0073	0,0759	Spred2
Stx16	7,8	7,18	1,53	0,0073	0,0759	Stx16
Tcaf1	1,56	2,56	-1,99	0,0073	0,0759	Tcaf1
Oasl2	7,27	5,07	4,6	0,0073	0,0761	Oasl2
Cdc14b	4,52	3,61	1,87	0,0073	0,0761	Cdc14b
Rims1	1,16	0,45	1,64	0,0073	0,0761	Rims1
Arhgap18	5,81	5,13	1,6	0,0073	0,0762	Arhgap18
Tuft1	3,26	2,52	1,67	0,0073	0,0764	Tuft1
Gm26947	3,09	2,13	1,94	0,0074	0,0765	Gm26947
A130077B15Rik	3,61	2,47	2,22	0,0075	0,0772	A130077B15Rik
Usp6nl	3,84	4,43	-1,5	0,0075	0,0772	Usp6nl
Rbm41	3,43	4,18	-1,68	0,0075	0,0772	Rbm41
Myl2	3,63	4,4	-1,71	0,0075	0,0774	Myl2
Pbx1	3,3	4,15	-1,79	0,0075	0,0774	Pbx1
Adcy8	1,06	2,28	-2,32	0,0075	0,0774	Adcy8
Cplx1	2,09	1,46	1,54	0,0076	0,0779	Cplx1
Nr1h3	1,9	1,07	1,78	0,0077	0,0781	Nr1h3
Angptl7	4,32	5,08	-1,7	0,0077	0,0781	Angptl7
Ccnjl	0,3	1,76	-2,76	0,0076	0,0781	Ccnjl
Ddx60	4,12	3,18	1,92	0,0077	0,0782	Ddx60
Slc16a9	0,5	2,31	-3,51	0,0077	0,0782	Slc16a9
Fam129a	6,76	5,89	1,83	0,0078	0,0789	Fam129a
A930017M01Rik	1,17	0,44	1,66	0,0078	0,0789	A930017M01Rik
Ypel2	4,37	4,99	-1,54	0,0078	0,0790	Ypel2
Cry1	1,4	2,3	-1,87	0,0078	0,0792	Cry1
Otub2	3,7	2,65	2,07	0,0079	0,0798	Otub2
LOC102632778	0,8	0,13	1,59	0,0079	0,0798	LOC102632778
Bhlhb9	2,42	3,36	-1,92	0,0079	0,0798	Bhlhb9
Ppp3cc	3,67	2,53	2,21	0,0079	0,0800	Ppp3cc
Nrxn2	3,7	2,96	1,66	0,0079	0,0800	Nrxn2
Plaur	5,77	5,05	1,65	0,0079	0,0800	Plaur
Lmtk2	2,76	1,78	1,98	0,0080	0,0801	Lmtk2
Sox4	6,52	7,42	-1,88	0,0080	0,0802	Sox4
Usp18	4,82	2,66	4,46	0,0080	0,0803	Usp18
Col20a1	2,24	1,13	2,15	0,0080	0,0803	Col20a1
Trp53cor1	2,91	3,57	-1,59	0,0080	0,0805	Trp53cor1
Gm36284	1,63	0,37	2,39	0,0081	0,0809	Gm36284
Irf2bpl	4,81	5,52	-1,63	0,0081	0,0809	Irf2bpl
9930021J03Rik	3,56	4,28	-1,65	0,0081	0,0810	9930021J03Rik
Atp9a	3,47	2,57	1,87	0,0082	0,0811	Atp9a
Rasal2	3,93	4,6	-1,59	0,0081	0,0811	Rasal2
Wdr54	1,98	0,78	2,29	0,0082	0,0814	Wdr54
Nr4a1	3,24	2,56	1,6	0,0082	0,0814	Nr4a1
Lpp	4,86	5,52	-1,57	0,0082	0,0815	Lpp
Rras2	3,96	4,81	-1,81	0,0082	0,0815	Rras2
Asap2	1,61	0,67	1,91	0,0082	0,0816	Asap2
Acbd4	1,01	0,33	1,6	0,0082	0,0816	Acbd4
Mb21d2	0,81	1,63	-1,78	0,0083	0,0817	Mb21d2
Ntng2	2,97	1,41	2,95	0,0083	0,0821	Ntng2
LOC108168394	1,43	0,55	1,84	0,0084	0,0825	LOC108168394
Gprasp2	0,23	1,85	-3,09	0,0084	0,0825	Gprasp2
AI429214	2,04	3,15	-2,15	0,0084	0,0826	AI429214
Clec4a3	3,58	4,98	-2,64	0,0084	0,0826	Clec4a3
Snap25	3,26	2,46	1,74	0,0085	0,0827	Snap25
Ryk	3,93	4,59	-1,58	0,0085	0,0827	Ryk
Gch1	3,31	2,67	1,56	0,0085	0,0828	Gch1
Daam1	5,03	4,42	1,52	0,0085	0,0828	Daam1
Smagp	6,04	5,43	1,53	0,0085	0,0829	Smagp
Agpat4	2,64	1,98	1,58	0,0085	0,0830	Agpat4
Oas3	4,97	1,07	14,91	0,0086	0,0832	Oas3
Rpa2	3,47	4,22	-1,69	0,0086	0,0832	Rpa2
Mmp9	2,39	0	5,24	0,0086	0,0833	Mmp9
1700113A16Rik	2,9	2,05	1,8	0,0086	0,0833	1700113A16Rik
Fam91a1	5,41	6,26	-1,81	0,0086	0,0833	Fam91a1
Cntnap1	4,16	2,78	2,6	0,0086	0,0835	Cntnap1
Rhof	3,03	1,99	2,05	0,0086	0,0835	Rhof
Plscr1	2,08	1,43	1,58	0,0086	0,0835	Plscr1
Ctnnal1	3,04	3,71	-1,59	0,0086	0,0835	Ctnnal1
Kcnma1	4,12	4,88	-1,69	0,0086	0,0835	Kcnma1
Cntn1	3,12	2,29	1,78	0,0086	0,0837	Cntn1
Echdc2	1,01	0,22	1,72	0,0087	0,0840	Echdc2
Ak6	1,34	2,11	-1,71	0,0087	0,0840	Ak6
Efr3b	2,77	1,61	2,23	0,0087	0,0842	Efr3b
Tomm7	5,01	4,42	1,51	0,0087	0,0842	Tomm7
Nr1d2	6,44	7,11	-1,58	0,0088	0,0844	Nr1d2
Mib2	8,27	8,99	-1,64	0,0088	0,0845	Mib2
Grm5	3,87	2,52	2,56	0,0088	0,0846	Grm5
Rap2b	3,08	1,85	2,34	0,0089	0,0849	Rap2b
Serpinb7	0,64	0	1,55	0,0089	0,0849	Serpinb7
Zfp697	2,99	4,13	-2,2	0,0089	0,0849	Zfp697
Pla2g16	4,52	3,73	1,72	0,0089	0,0851	Pla2g16
Nupr1	5,24	4,54	1,62	0,0089	0,0852	Nupr1
Zdhhc23	1,71	0,33	2,62	0,0090	0,0853	Zdhhc23
Atp8b4	0,91	0	1,88	0,0089	0,0853	Atp8b4
Rph3a	2,8	1,99	1,76	0,0090	0,0856	Rph3a
Map4k5	5,76	6,35	-1,5	0,0090	0,0856	Map4k5
Slamf8	7,13	6,2	1,91	0,0090	0,0859	Slamf8
Pdgfc	1,97	1,24	1,67	0,0090	0,0859	Pdgfc
Hapln2	1,96	0,95	2,02	0,0091	0,0860	Hapln2
Igsf8	4,16	3,54	1,54	0,0091	0,0863	Igsf8
Nfib	2,34	0,94	2,65	0,0092	0,0866	Nfib
Dgkg	2,58	1,11	2,77	0,0093	0,0873	Dgkg
Gm6277	4,99	5,63	-1,56	0,0093	0,0874	Gm6277
Olfr1034	0,11	0,93	-1,77	0,0093	0,0875	Olfr1034
Usp21	6,37	6,99	-1,53	0,0093	0,0876	Usp21
Atf5	2,26	1,36	1,86	0,0094	0,0883	Atf5
Gm36774	0,69	1,47	-1,72	0,0095	0,0886	Gm36774
Tmem171	0,75	0	1,68	0,0095	0,0888	Tmem171
Ppp2ca	8,62	9,24	-1,54	0,0095	0,0888	Ppp2ca
Eno3	2,95	4	-2,07	0,0095	0,0889	Eno3
Gpr84	8,24	7,46	1,71	0,0095	0,0890	Gpr84
LOC108169124	0,97	1,74	-1,71	0,0095	0,0892	LOC108169124
Plekho2	8,61	7,86	1,69	0,0096	0,0893	Plekho2
Gpld1	1,41	0,6	1,75	0,0096	0,0896	Gpld1
Gys1	4,85	4,21	1,55	0,0096	0,0896	Gys1
2010111I01Rik	4,58	3,7	1,84	0,0097	0,0899	2010111I01Rik
Arhgef40	6,38	7,11	-1,66	0,0097	0,0899	Arhgef40
Peg10	0,72	1,76	-2,05	0,0097	0,0899	Peg10
Abca1	10,13	9,47	1,58	0,0097	0,0900	Abca1
Spryd7	4,24	3,66	1,5	0,0097	0,0903	Spryd7
Myo10	3,11	1,47	3,11	0,0098	0,0908	Myo10
Tctn3	4,76	4,12	1,56	0,0098	0,0910	Tctn3
Phf11a	3,73	1,8	3,81	0,0099	0,0911	Phf11a
S100a10	1,13	2,14	-2,02	0,0099	0,0911	S100a10
Pik3c2b	4,48	5,15	-1,6	0,0100	0,0916	Pik3c2b
8030442B05Rik	5,62	6,31	-1,61	0,0099	0,0916	8030442B05Rik
Kcp	1,05	1,94	-1,86	0,0099	0,0916	Kcp
Zfp641	1,62	2,77	-2,22	0,0100	0,0916	Zfp641
Amer2	3,24	2,58	1,58	0,0101	0,0922	Amer2
Gm7694	3,51	4,39	-1,85	0,0101	0,0924	Gm7694
Gcat	3,03	1,82	2,31	0,0102	0,0928	Gcat
Ccdc120	1,53	0,56	1,97	0,0102	0,0928	Ccdc120
Sipa1l1	4,97	5,71	-1,68	0,0102	0,0928	Sipa1l1
Akap3	0,93	0	1,91	0,0103	0,0936	Akap3
Kcnc1	3,41	2,61	1,73	0,0103	0,0936	Kcnc1
Nfkbid	6,3	5,57	1,66	0,0103	0,0936	Nfkbid
Neurl1a	3,93	4,93	-2,01	0,0103	0,0936	Neurl1a
Oas1b	3,57	2,81	1,7	0,0104	0,0943	Oas1b
Arhgap31	5,93	6,64	-1,63	0,0105	0,0945	Arhgap31
Zfp652	6,35	7,14	-1,73	0,0105	0,0945	Zfp652
Kcna6	1,91	1,21	1,62	0,0105	0,0947	Kcna6
Ablim1	3,79	4,69	-1,87	0,0105	0,0950	Ablim1
Nrcam	2,97	1,82	2,22	0,0106	0,0951	Nrcam
Tmed1	3,79	3,14	1,57	0,0106	0,0951	Tmed1
Tmprss4	1,48	0,34	2,2	0,0106	0,0952	Tmprss4
LOC108167997	0,91	2,24	-2,52	0,0106	0,0952	LOC108167997
Atp2b3	3,52	2,93	1,5	0,0106	0,0955	Atp2b3
Pdk1	3,22	4,06	-1,79	0,0107	0,0957	Pdk1
Spock2	3,97	3,11	1,82	0,0108	0,0959	Spock2
Rilpl2	3,99	3,29	1,62	0,0108	0,0959	Rilpl2
Sort1	6,55	7,4	-1,81	0,0107	0,0959	Sort1
Lrrc1	1,29	2,39	-2,14	0,0108	0,0959	Lrrc1
Uck2	3,63	2,81	1,77	0,0108	0,0965	Uck2
Pygm	2,74	3,44	-1,63	0,0108	0,0965	Pygm
Spef2	1,58	0,64	1,93	0,0109	0,0966	Spef2
Arhgap19	3,11	2,34	1,7	0,0109	0,0968	Arhgap19
Ephb6	0,9	0,2	1,62	0,0109	0,0968	Ephb6
Lactb	4,59	5,47	-1,84	0,0109	0,0970	Lactb
Rnf213	6,05	4,83	2,33	0,0110	0,0972	Rnf213
Ccdc159	1,8	0,42	2,59	0,0110	0,0973	Ccdc159
Sla	8,33	8,96	-1,54	0,0110	0,0973	Sla
LOC108167440	3,44	2,31	2,18	0,0110	0,0976	LOC108167440
4833419F23Rik	1,27	0,68	1,5	0,0111	0,0978	4833419F23Rik
Dll1	1,62	2,85	-2,35	0,0113	0,0989	Dll1
Kcnq2	3,78	2,23	2,92	0,0114	0,0995	Kcnq2
Hspa4l	3,02	2,12	1,87	0,0114	0,0997	Hspa4l
Adcy1	4,75	3,81	1,92	0,0114	0,1001	Adcy1
Mgat5b	2,17	0,82	2,55	0,0115	0,1003	Mgat5b
B430306N03Rik	6,18	5,3	1,84	0,0115	0,1005	B430306N03Rik
Plekhg1	2,1	0,31	3,45	0,0116	0,1009	Plekhg1
Cd163	2,26	1,29	1,96	0,0117	0,1015	Cd163
Tctex1d4	1,25	0,57	1,61	0,0117	0,1015	Tctex1d4
Sh3rf1	2,13	1,47	1,58	0,0117	0,1017	Sh3rf1
Gm29927	1,06	2,43	-2,58	0,0117	0,1017	Gm29927
Tfap4	3,88	4,61	-1,66	0,0117	0,1018	Tfap4
Clstn3	4,19	3,07	2,16	0,0118	0,1020	Clstn3
Hist1h3d	5,16	3,82	2,55	0,0119	0,1026	Hist1h3d
Sh3bgrl3	8,31	7,59	1,65	0,0119	0,1026	Sh3bgrl3
Kif1c	5,93	5,27	1,57	0,0119	0,1026	Kif1c
LOC102637873	1,22	0,6	1,54	0,0120	0,1028	LOC102637873
Adgb	1,67	0,49	2,26	0,0120	0,1029	Adgb
Miat	4,48	2,49	3,96	0,0120	0,1030	Miat
Sptbn2	2,84	1,77	2,1	0,0120	0,1031	Sptbn2
Gm5122	0,93	0,1	1,78	0,0120	0,1031	Gm5122
Syp	4,07	3,25	1,76	0,0120	0,1031	Syp
Cbarp	5,09	4,28	1,75	0,0121	0,1031	Cbarp
Slamf6	3,98	3,29	1,61	0,0120	0,1031	Slamf6
Gm31633	0,63	0	1,54	0,0121	0,1032	Gm31633
Ubxn2b	3,06	3,77	-1,64	0,0121	0,1035	Ubxn2b
Abtb2	1,6	0,8	1,75	0,0121	0,1037	Abtb2
Ticrr	1,48	0,83	1,57	0,0123	0,1044	Ticrr
Sptbn4	1,69	0,6	2,12	0,0123	0,1046	Sptbn4
Epb41l1	2,47	1,81	1,58	0,0123	0,1046	Epb41l1
Xist	10,41	9,81	1,51	0,0124	0,1047	Xist
Mt3	3,46	2,59	1,83	0,0124	0,1049	Mt3
Gabrb3	1,86	1,09	1,71	0,0125	0,1052	Gabrb3
Sybu	1,2	0,45	1,68	0,0125	0,1052	Sybu
Ddit4	5,3	6,31	-2,02	0,0126	0,1060	Ddit4
D030028A08Rik	2,46	3,19	-1,65	0,0127	0,1064	D030028A08Rik
Rdh5	2,94	2,27	1,59	0,0127	0,1067	Rdh5
Adam22	3,62	2,87	1,68	0,0128	0,1070	Adam22
Tlcd1	1,11	0,45	1,58	0,0128	0,1070	Tlcd1
Tcp11l2	4,45	5,16	-1,64	0,0128	0,1070	Tcp11l2
Atp10a	2,43	1,47	1,96	0,0129	0,1071	Atp10a
Krt7	1,52	0,3	2,33	0,0129	0,1073	Krt7
Tnf	2,04	0,66	2,61	0,0130	0,1080	Tnf
Rims2	1,69	0,79	1,87	0,0130	0,1081	Rims2
Mex3a	1,04	1,64	-1,51	0,0131	0,1082	Mex3a
Negr1	1,73	0,94	1,72	0,0131	0,1084	Negr1
Gm30794	1,2	2,19	-1,98	0,0132	0,1089	Gm30794
Celsr3	2,2	1,02	2,26	0,0132	0,1091	Celsr3
Rad51b	1,47	0,7	1,7	0,0132	0,1091	Rad51b
Ctla2a	1,3	0,24	2,08	0,0133	0,1093	Ctla2a
Osbpl10	2,67	1,26	2,65	0,0133	0,1094	Osbpl10
Nfe2	1,18	0,25	1,9	0,0133	0,1094	Nfe2
Spred3	3,23	2,28	1,93	0,0134	0,1098	Spred3
Mdk	2,45	1,44	2,02	0,0134	0,1099	Mdk
Slfn3	3,28	2,1	2,26	0,0134	0,1100	Slfn3
Rasgrp2	1,58	0,44	2,19	0,0135	0,1103	Rasgrp2
Cyp51	3,71	3,06	1,56	0,0136	0,1107	Cyp51
Irf7	6,47	4,65	3,53	0,0137	0,1113	Irf7
Stard4	2,49	1,58	1,88	0,0137	0,1116	Stard4
Ppp1r26	1,58	2,66	-2,11	0,0138	0,1122	Ppp1r26
Ebf3	4,01	4,62	-1,53	0,0139	0,1124	Ebf3
Abl1	8,51	9,29	-1,72	0,0139	0,1124	Abl1
Grk6	7,57	6,93	1,56	0,0139	0,1125	Grk6
Il6st	8,87	9,54	-1,59	0,0139	0,1126	Il6st
Coro2b	2,21	1,09	2,17	0,0139	0,1128	Coro2b
Fcgr2b	2,17	1,43	1,67	0,0139	0,1128	Fcgr2b
Sppl3	6,98	7,72	-1,67	0,0139	0,1128	Sppl3
Pla2g2d	0,91	0,21	1,62	0,0140	0,1131	Pla2g2d
Apool	3,78	4,4	-1,54	0,0140	0,1131	Apool
Rep15	0,98	0,36	1,53	0,0141	0,1137	Rep15
Adtrp	1,65	2,35	-1,62	0,0142	0,1141	Adtrp
Pim1	5,18	3,82	2,57	0,0142	0,1142	Pim1
Ephb2	1,61	0,88	1,66	0,0143	0,1147	Ephb2
Fam213a	3,46	2,41	2,08	0,0144	0,1148	Fam213a
Mtcl1	2,41	1,64	1,7	0,0146	0,1160	Mtcl1
Gltp	6,26	5,67	1,51	0,0146	0,1162	Gltp
Rell1	3,5	2,73	1,7	0,0147	0,1167	Rell1
Fbxl21	2,93	2,02	1,88	0,0147	0,1168	Fbxl21
LOC108167568	1,82	0,79	2,04	0,0148	0,1169	LOC108167568
Pcsk2	3,15	2,32	1,77	0,0148	0,1169	Pcsk2
Net1	2,01	1,33	1,61	0,0147	0,1169	Net1
Mfsd6	2,56	1,12	2,72	0,0148	0,1171	Mfsd6
Dpf1	2,23	1,06	2,25	0,0149	0,1173	Dpf1
Astn2	2,6	1,57	2,04	0,0149	0,1173	Astn2
Kif7	1,19	0,6	1,5	0,0148	0,1173	Kif7
Atp6v1g2	3,33	2,48	1,79	0,0150	0,1178	Atp6v1g2
Scaf11	5,14	5,73	-1,5	0,0150	0,1180	Scaf11
Rsad2	2,87	0,97	3,72	0,0151	0,1181	Rsad2
Igsf6	5,94	5,01	1,92	0,0150	0,1181	Igsf6
Fam229b	1,74	1,09	1,56	0,0151	0,1183	Fam229b
Maff	3,06	1,08	3,94	0,0152	0,1187	Maff
Myo9b	8,61	7,96	1,57	0,0153	0,1192	Myo9b
Plxna2	1,97	0,97	2	0,0153	0,1195	Plxna2
Sobp	1,64	1,04	1,51	0,0155	0,1203	Sobp
Ppargc1b	3,21	2,15	2,09	0,0155	0,1204	Ppargc1b
Slc17a7	4,44	3,58	1,82	0,0155	0,1204	Slc17a7
Sema6a	1,2	0,37	1,77	0,0155	0,1204	Sema6a
Atg16l2	3,89	3,12	1,71	0,0155	0,1204	Atg16l2
Kcnc3	2,24	1,53	1,63	0,0155	0,1204	Kcnc3
F3	2,13	1	2,18	0,0157	0,1213	F3
Ptprt	2,8	1,46	2,52	0,0157	0,1215	Ptprt
Rassf7	1,93	1,06	1,83	0,0157	0,1215	Rassf7
Ceacam1	6,31	7,28	-1,95	0,0158	0,1218	Ceacam1
Cecr2	0,1	1,29	-2,28	0,0158	0,1218	Cecr2
Mbnl2	4,11	3,19	1,89	0,0158	0,1221	Mbnl2
Parp11	6,23	5,31	1,89	0,0159	0,1226	Parp11
Gbp3	5,93	5,3	1,55	0,0159	0,1228	Gbp3
Atp2b2	5,33	4,48	1,8	0,0160	0,1229	Atp2b2
Cdk18	2,28	1,25	2,04	0,0160	0,1232	Cdk18
Dpep2	2,33	1,56	1,71	0,0161	0,1238	Dpep2
Gm4943	1,67	2,39	-1,64	0,0162	0,1240	Gm4943
Agbl4	1,54	0,47	2,1	0,0162	0,1242	Agbl4
Tmem191c	1,66	1,05	1,52	0,0163	0,1248	Tmem191c
4930487H11Rik	3,09	3,95	-1,82	0,0163	0,1248	4930487H11Rik
Rtp4	7,33	6,18	2,22	0,0164	0,1254	Rtp4
Cenpe	2,02	0,87	2,23	0,0165	0,1262	Cenpe
Csmd2	1,18	0,55	1,55	0,0166	0,1263	Csmd2
Prune2	2,05	1,09	1,94	0,0167	0,1267	Prune2
Adamts20	0,96	0,11	1,8	0,0167	0,1267	Adamts20
Jph3	2,67	1,98	1,61	0,0167	0,1267	Jph3
Stx1b	1,93	1,3	1,54	0,0166	0,1267	Stx1b
Olfm2	1,92	1,03	1,86	0,0168	0,1273	Olfm2
Atp6v0d2	0,59	0	1,5	0,0168	0,1274	Atp6v0d2
Prrt1	3,51	2,66	1,8	0,0168	0,1276	Prrt1
Rec114	1,19	2,08	-1,86	0,0168	0,1276	Rec114
Kcna1	2,3	1,33	1,96	0,0171	0,1286	Kcna1
Dennd1a	6,14	5,38	1,69	0,0171	0,1286	Dennd1a
Ablim2	3,66	2,48	2,27	0,0171	0,1289	Ablim2
Eef1a2	2,96	2,19	1,71	0,0171	0,1289	Eef1a2
Nudt1	3,18	2,53	1,57	0,0171	0,1289	Nudt1
Nhsl2	0,45	1,61	-2,24	0,0171	0,1289	Nhsl2
Olfr99	3,82	2,91	1,88	0,0172	0,1290	Olfr99
Alms1	3,47	2,68	1,73	0,0172	0,1293	Alms1
Mbd4	1,19	0,53	1,58	0,0172	0,1293	Mbd4
Srcin1	3,02	2,15	1,83	0,0173	0,1295	Srcin1
H2-M3	6,33	5,3	2,05	0,0173	0,1297	H2-M3
Mcm9	5,25	4,64	1,53	0,0173	0,1298	Mcm9
Snx6	6,02	6,75	-1,65	0,0174	0,1299	Snx6
Arglu1	5,75	6,49	-1,67	0,0174	0,1304	Arglu1
Trp53inp2	4,5	3,78	1,65	0,0175	0,1305	Trp53inp2
Sv2b	2,23	1,4	1,78	0,0175	0,1309	Sv2b
Gm35113	1,5	0,45	2,08	0,0176	0,1310	Gm35113
Kalrn	4,51	2	5,7	0,0176	0,1314	Kalrn
Ptrh1	1,37	0,44	1,91	0,0177	0,1316	Ptrh1
Gm684	0,43	1,23	-1,74	0,0177	0,1317	Gm684
Sgsm1	1,71	0,81	1,87	0,0177	0,1318	Sgsm1
Grm4	3,11	1,85	2,39	0,0178	0,1319	Grm4
Ier5l	1,37	0,73	1,56	0,0177	0,1319	Ier5l
Fstl5	1,13	0,54	1,51	0,0178	0,1319	Fstl5
Gata2	0,1	0,7	-1,52	0,0178	0,1319	Gata2
Ppm1e	0,86	2,34	-2,8	0,0178	0,1319	Ppm1e
Pcdh11x	0,85	0,17	1,6	0,0179	0,1325	Pcdh11x
Rragb	0,92	0,3	1,55	0,0179	0,1326	Rragb
D7Ertd443e	0,83	2,05	-2,34	0,0180	0,1331	D7Ertd443e
Ppp1r13l	2,74	3,44	-1,63	0,0181	0,1335	Ppp1r13l
Fam133b	3,67	4,5	-1,77	0,0182	0,1335	Fam133b
Abcg3	1,32	2,02	-1,63	0,0182	0,1336	Abcg3
Dmrtb1	1,49	2,54	-2,06	0,0183	0,1344	Dmrtb1
Fstl4	1,58	0,78	1,75	0,0184	0,1349	Fstl4
Slc7a1	5,58	4,73	1,81	0,0185	0,1350	Slc7a1
Magi1	5,42	6,25	-1,78	0,0185	0,1353	Magi1
Actr3b	1,98	0,82	2,24	0,0186	0,1356	Actr3b
Nphp4	1,57	0,57	2	0,0186	0,1356	Nphp4
Samd12	2,51	1,26	2,39	0,0187	0,1357	Samd12
Mx1	5,03	3,26	3,42	0,0188	0,1363	Mx1
P4htm	2,94	2,04	1,87	0,0188	0,1363	P4htm
Tmem220	2,8	1,98	1,76	0,0188	0,1364	Tmem220
Cmpk2	4,79	2,79	3,98	0,0190	0,1378	Cmpk2
Mpped1	1,62	0,93	1,61	0,0193	0,1396	Mpped1
Ifitm6	1,92	0	3,77	0,0194	0,1397	Ifitm6
Ndrg2	2,71	1,99	1,64	0,0195	0,1401	Ndrg2
Baiap2	4,62	3,92	1,63	0,0196	0,1401	Baiap2
Zfp36l3	0,82	1,44	-1,54	0,0196	0,1402	Zfp36l3
Bzrap1	3,6	2	3,03	0,0196	0,1403	Bzrap1
Arpp21	4,06	2,46	3,03	0,0196	0,1403	Arpp21
Csrnp2	3,91	4,53	-1,54	0,0197	0,1404	Csrnp2
Fkbp14	3,21	4,04	-1,78	0,0198	0,1408	Fkbp14
AA467197	0,89	0	1,85	0,0199	0,1411	AA467197
Cacng8	2,53	1,74	1,73	0,0199	0,1411	Cacng8
Cacnb1	1,91	1,3	1,52	0,0199	0,1411	Cacnb1
Gm32026	2,63	1,79	1,8	0,0199	0,1413	Gm32026
Chrm3	3,12	1,67	2,74	0,0200	0,1417	Chrm3
Grm8	1,46	0,71	1,69	0,0201	0,1420	Grm8
Ubac1	4,41	5,04	-1,54	0,0201	0,1420	Ubac1
Dact3	1,72	4,06	-5,06	0,0201	0,1420	Dact3
Gpsm2	0,78	0,2	1,5	0,0201	0,1421	Gpsm2
Kctd12b	2,66	3,84	-2,26	0,0202	0,1421	Kctd12b
Pfkfb1	2,46	1,62	1,79	0,0202	0,1425	Pfkfb1
C330027C09Rik	2,02	1,39	1,54	0,0202	0,1426	C330027C09Rik
Egfl7	1,39	0,75	1,55	0,0203	0,1429	Egfl7
Cd101	3,23	4,15	-1,9	0,0203	0,1429	Cd101
Klrd1	0,21	0,98	-1,71	0,0204	0,1430	Klrd1
Arhgef25	1,52	2,77	-2,37	0,0203	0,1430	Arhgef25
Kifc1	3,69	2,88	1,76	0,0205	0,1435	Kifc1
Gm20172	1,18	0,58	1,52	0,0207	0,1446	Gm20172
Mtss1l	2,63	2,02	1,52	0,0208	0,1450	Mtss1l
Hid1	1,61	0,79	1,77	0,0209	0,1452	Hid1
Epha2	7,26	6,63	1,55	0,0209	0,1453	Epha2
Gm29907	1,33	0,6	1,66	0,0209	0,1454	Gm29907
Brsk2	1,26	0,2	2,09	0,0210	0,1455	Brsk2
Gm6402	2,14	2,77	-1,55	0,0210	0,1455	Gm6402
Pyhin1	5,14	3,54	3,05	0,0212	0,1470	Pyhin1
Chsy1	7,98	8,59	-1,53	0,0212	0,1470	Chsy1
Fjx1	1,22	0,45	1,71	0,0213	0,1476	Fjx1
Grrp1	0,15	1,14	-1,98	0,0214	0,1477	Grrp1
Erc1	3,32	2,49	1,77	0,0214	0,1479	Erc1
Tmem128	4,96	5,69	-1,66	0,0214	0,1479	Tmem128
1110001J03Rik	3,62	3,02	1,51	0,0215	0,1486	1110001J03Rik
Asap3	7,31	8,12	-1,76	0,0216	0,1487	Asap3
Sigirr	1,82	0,56	2,39	0,0217	0,1492	Sigirr
Hlx	2,81	1,91	1,86	0,0217	0,1492	Hlx
Snhg11	6,88	4,81	4,19	0,0218	0,1496	Snhg11
Slc7a4	2,34	1,58	1,69	0,0221	0,1513	Slc7a4
Tmem178b	3,25	1,89	2,56	0,0221	0,1515	Tmem178b
Ace	1,03	0,18	1,79	0,0221	0,1515	Ace
Dbn1	2,79	1,76	2,05	0,0223	0,1521	Dbn1
Arfgef2	5,21	4,52	1,62	0,0225	0,1531	Arfgef2
LOC105245439	4,01	4,63	-1,54	0,0225	0,1533	LOC105245439
Efna5	0,82	1,48	-1,58	0,0226	0,1534	Efna5
Col6a1	2,63	1,61	2,03	0,0227	0,1540	Col6a1
Meg3	8,18	6,34	3,58	0,0228	0,1546	Meg3
Slit3	1,91	1,19	1,64	0,0228	0,1546	Slit3
Tmem154	2,11	1,22	1,86	0,0229	0,1547	Tmem154
Epha10	1,66	0,91	1,68	0,0229	0,1548	Epha10
Syt14	1,39	0,67	1,65	0,0229	0,1548	Syt14
B130006D01Rik	3,89	4,54	-1,57	0,0229	0,1548	B130006D01Rik
Grik2	3,31	2,3	2,01	0,0230	0,1550	Grik2
AA414768	2,66	1,85	1,76	0,0230	0,1551	AA414768
Clec4a4	0,87	1,74	-1,83	0,0230	0,1552	Clec4a4
Sdccag3	6,33	7,04	-1,63	0,0232	0,1561	Sdccag3
Exoc3l4	2,42	1,39	2,05	0,0233	0,1565	Exoc3l4
Mmp12	1,44	0,71	1,66	0,0233	0,1565	Mmp12
Inpp4a	6,11	5,49	1,54	0,0234	0,1570	Inpp4a
Prkg1	0,46	1,33	-1,82	0,0234	0,1570	Prkg1
Grin2a	4,06	2,77	2,46	0,0234	0,1573	Grin2a
Enkd1	3,09	2,47	1,54	0,0234	0,1573	Enkd1
Pard6g	1,2	0,11	2,13	0,0235	0,1578	Pard6g
Syt1	3,56	2,52	2,05	0,0236	0,1578	Syt1
Cspg4	1,38	0,78	1,52	0,0236	0,1580	Cspg4
Ngef	2,55	1,19	2,57	0,0237	0,1584	Ngef
1700007L15Rik	2,05	1,46	1,51	0,0237	0,1586	1700007L15Rik
Cc2d2a	0,99	1,72	-1,66	0,0237	0,1586	Cc2d2a
Ptgfrn	3,52	4,48	-1,95	0,0237	0,1587	Ptgfrn
Cask	3,07	2,48	1,5	0,0238	0,1588	Cask
Pmm1	1,62	0,98	1,56	0,0238	0,1589	Pmm1
Lmtk3	4,22	3,05	2,25	0,0239	0,1594	Lmtk3
Egr2	0,96	0,37	1,51	0,0239	0,1594	Egr2
Cckbr	1,88	0,88	1,99	0,0240	0,1598	Cckbr
Ccrl2	5,56	4,68	1,83	0,0242	0,1603	Ccrl2
Fam167b	3,47	4,15	-1,61	0,0242	0,1606	Fam167b
Alk	1,27	0,34	1,9	0,0243	0,1608	Alk
Pilrb2	0,6	0	1,52	0,0243	0,1609	Pilrb2
Mgl2	1,04	0,14	1,87	0,0243	0,1610	Mgl2
Pgbd5	2,42	1,14	2,44	0,0243	0,1611	Pgbd5
Lingo2	1,33	0,16	2,25	0,0244	0,1613	Lingo2
Nr2f1	1,48	0,48	2	0,0244	0,1613	Nr2f1
St8sia1	4,44	3,18	2,41	0,0245	0,1616	St8sia1
Kcnt1	3,09	1,42	3,18	0,0246	0,1622	Kcnt1
Gm12216	4,71	3,86	1,81	0,0246	0,1622	Gm12216
Nmnat2	1,34	0,6	1,67	0,0246	0,1622	Nmnat2
Inf2	4,39	3,26	2,19	0,0249	0,1633	Inf2
Shank3	2,01	1,1	1,88	0,0248	0,1633	Shank3
Dcstamp	0,69	0	1,61	0,0249	0,1633	Dcstamp
A830052D11Rik	0,78	1,4	-1,54	0,0248	0,1633	A830052D11Rik
Anpep	0,92	0,31	1,53	0,0250	0,1641	Anpep
Anxa1	1,85	0,2	3,13	0,0251	0,1642	Anxa1
Cadm2	2,93	1,78	2,22	0,0251	0,1642	Cadm2
Ovol2	0,66	0	1,58	0,0252	0,1644	Ovol2
4933411K16Rik	2,21	2,84	-1,55	0,0252	0,1644	4933411K16Rik
Cabyr	2,04	0,99	2,08	0,0253	0,1650	Cabyr
Mpdz	0,9	0,1	1,73	0,0254	0,1653	Mpdz
Bsn	3,84	4,63	-1,73	0,0254	0,1653	Bsn
Mdp1	4,15	4,75	-1,52	0,0254	0,1655	Mdp1
Tpgs1	4,26	4,95	-1,62	0,0255	0,1656	Tpgs1
Gm1070	2,55	1,65	1,86	0,0255	0,1657	Gm1070
Cntn2	3,18	2,5	1,61	0,0255	0,1657	Cntn2
Dnm1	5,38	3,95	2,69	0,0255	0,1658	Dnm1
Mybl1	2,61	1,75	1,81	0,0256	0,1658	Mybl1
Chchd10	2,77	2,01	1,7	0,0255	0,1658	Chchd10
Gm36529	0,82	1,78	-1,95	0,0256	0,1658	Gm36529
Gm15743	1,36	0,42	1,92	0,0257	0,1664	Gm15743
Kcnb1	2,69	1,72	1,96	0,0259	0,1672	Kcnb1
Aifm3	3,28	1,49	3,46	0,0260	0,1675	Aifm3
Aldoc	5,04	4,34	1,63	0,0261	0,1680	Aldoc
Gria1	3,7	2,31	2,62	0,0261	0,1682	Gria1
Slit2	1,08	0,12	1,95	0,0261	0,1683	Slit2
Tgfb3	1,37	0,54	1,79	0,0262	0,1683	Tgfb3
Senp6	3,5	4,13	-1,55	0,0262	0,1685	Senp6
Pcbp4	3,24	2,48	1,69	0,0263	0,1688	Pcbp4
Slc45a1	2,07	1,26	1,76	0,0264	0,1690	Slc45a1
Ltk	0,59	0	1,5	0,0264	0,1690	Ltk
Mpv17l	2,75	3,78	-2,04	0,0264	0,1690	Mpv17l
Cntnap5a	2,03	0,76	2,4	0,0264	0,1692	Cntnap5a
Treml4	1,86	1,05	1,74	0,0267	0,1707	Treml4
Shank1	2,48	1,86	1,53	0,0267	0,1707	Shank1
Arcn1	6,34	7,01	-1,59	0,0268	0,1711	Arcn1
Nfasc	3,78	2,59	2,28	0,0269	0,1714	Nfasc
Hpse	1,56	0,83	1,66	0,0270	0,1719	Hpse
Pde1b	7,07	7,74	-1,59	0,0272	0,1723	Pde1b
Dlgap2	2,8	1,3	2,82	0,0273	0,1729	Dlgap2
Smad3	7,21	7,84	-1,55	0,0273	0,1729	Smad3
Nrsn1	2,14	1,39	1,68	0,0275	0,1738	Nrsn1
Ccdc62	2,03	3,07	-2,06	0,0275	0,1738	Ccdc62
Il3ra	2,92	2,16	1,7	0,0276	0,1741	Il3ra
Emp1	0,77	0	1,71	0,0276	0,1745	Emp1
Btbd17	1	1,74	-1,67	0,0277	0,1747	Btbd17
Gna14	2,74	2,02	1,65	0,0279	0,1758	Gna14
Med21	2,01	2,72	-1,64	0,0281	0,1766	Med21
Slc1a4	4,96	4,34	1,54	0,0282	0,1769	Slc1a4
Nyap1	2,9	2,15	1,68	0,0282	0,1770	Nyap1
Edil3	2,13	1,27	1,82	0,0284	0,1776	Edil3
Arhgap33	2,85	2,1	1,68	0,0284	0,1776	Arhgap33
Gabra5	0,84	0,21	1,54	0,0283	0,1776	Gabra5
Tmeff1	1,77	0,7	2,09	0,0284	0,1777	Tmeff1
Eid1	1,76	1,17	1,51	0,0285	0,1780	Eid1
Mical2	3,41	2,67	1,67	0,0285	0,1782	Mical2
P2rx1	3,91	4,59	-1,6	0,0287	0,1790	P2rx1
Adk	3,63	2,89	1,67	0,0288	0,1793	Adk
Gm572	0,98	1,86	-1,85	0,0288	0,1793	Gm572
Spin4	0,32	1,38	-2,08	0,0290	0,1800	Spin4
Pafah1b1	3,36	4,18	-1,77	0,0292	0,1809	Pafah1b1
Ppargc1a	1,35	0,11	2,36	0,0292	0,1811	Ppargc1a
Ccdc88c	1,67	0,98	1,62	0,0292	0,1811	Ccdc88c
Naalad2	3,78	4,59	-1,76	0,0293	0,1815	Naalad2
Ikbke	2,67	1,07	3,02	0,0294	0,1818	Ikbke
LOC108167732	5,07	6,13	-2,07	0,0296	0,1825	LOC108167732
4933424M12Rik	2,62	1,97	1,57	0,0297	0,1828	4933424M12Rik
Adgrb3	3,57	2,08	2,81	0,0297	0,1830	Adgrb3
Itpka	1,4	0,73	1,59	0,0297	0,1831	Itpka
Bard1	1,78	2,44	-1,57	0,0298	0,1834	Bard1
Vapa	6,22	6,81	-1,51	0,0299	0,1838	Vapa
Dok4	1,9	1,07	1,77	0,0300	0,1839	Dok4
Slco3a1	2,22	1,57	1,57	0,0300	0,1839	Slco3a1
5830416I19Rik	0,65	0	1,57	0,0300	0,1840	5830416I19Rik
Tenm4	2,68	1,44	2,36	0,0303	0,1849	Tenm4
Ncam1	4,05	3,11	1,91	0,0304	0,1852	Ncam1
Ptprn	4,07	3,17	1,86	0,0304	0,1852	Ptprn
Enah	2,51	1,71	1,74	0,0304	0,1853	Enah
Sh3rf3	1,61	0,37	2,36	0,0305	0,1855	Sh3rf3
Mef2d	3,43	4,03	-1,51	0,0305	0,1856	Mef2d
Gad2	0,81	0,2	1,53	0,0306	0,1857	Gad2
Glrp1	1,91	2,7	-1,73	0,0306	0,1857	Glrp1
Cuedc1	1,25	0,64	1,53	0,0307	0,1861	Cuedc1
Vegfa	3,14	2,13	2,02	0,0307	0,1862	Vegfa
Kcnk2	0,78	0,11	1,59	0,0307	0,1863	Kcnk2
Akap6	3,06	2,04	2,04	0,0310	0,1876	Akap6
Kbtbd6	2,37	1,48	1,86	0,0311	0,1878	Kbtbd6
Btbd3	3,83	4,47	-1,56	0,0311	0,1878	Btbd3
Slc38a9	3,11	4,17	-2,08	0,0311	0,1878	Slc38a9
Gnao1	4	3,2	1,74	0,0313	0,1884	Gnao1
Atpif1	1,15	0,5	1,57	0,0316	0,1896	Atpif1
Tppp3	1,21	0,55	1,58	0,0316	0,1898	Tppp3
Ankrd28	4,08	3,24	1,79	0,0317	0,1900	Ankrd28
Ipw	2,14	1,27	1,83	0,0317	0,1903	Ipw
Slfn5	5,03	3,46	2,97	0,0318	0,1904	Slfn5
Lrfn5	2,25	1,21	2,06	0,0318	0,1905	Lrfn5
Atp2b4	2,72	1,86	1,82	0,0319	0,1907	Atp2b4
Tmem35	1,06	0,4	1,58	0,0321	0,1919	Tmem35
Tmem107	2,18	1,38	1,74	0,0323	0,1924	Tmem107
Tmem246	1,28	0,37	1,88	0,0323	0,1925	Tmem246
Thnsl2	1,67	2,59	-1,89	0,0325	0,1934	Thnsl2
Hhat	2,5	3,22	-1,65	0,0327	0,1940	Hhat
Gm30908	1,02	0,32	1,62	0,0328	0,1943	Gm30908
Gm20594	0,9	0,3	1,52	0,0328	0,1943	Gm20594
[truncated: 16 more rows]

## Sheet: Oxidative Stress vs Pfn1 DE's
ID	flfl cre+ Avg (log2)	flfl Avg (log2)	Fold Change	P-val	FDR P-val	Gene Symbol	Description			Oxidative Stress vs Pfn1 DE's			By Fold Change
Ifi203	6,46	0,37	67,88	3,45E-08	0,0003	Ifi203				Blvrb			Top 5 Upregulated	Sample Signals (log2)
Pf4	7,06	1,71	40,97	4,69E-08	0,0003	Pf4				Itgb7				fl/fl	fl/fl	fl/fl	fl/fl Cre+	fl/fl Cre+	fl/fl Cre+
Ctse	5,92	0,86	33,4	2,12E-08	0,0003	Ctse				Cd274			Cxcr4	1,22	1,02	1,79	8,13	8,68	8,35
Clec2d	8,45	6,82	3,11	7,07E-08	0,0003	Clec2d				Axl			Clec12a	0,6	0,53	0,23	7,07	7,38	7,33
Sirpb1b	3,65	0	12,54	9,08E-08	0,0004	Sirpb1b				Tubb6			Ms4a7	0,37	0,37	0,52	7,14	7,35	6,92
Tlr8	7,2	0,11	136,45	2,84E-07	0,0005	Tlr8				Metrnl			Itgal	0,8	0,53	1,31	7,54	7,45	7,28
Ms4a4a	7,37	0,31	133,68	2,26E-07	0,0005	Ms4a4a				Tlr2			Cybb	1,78	1,58	2,87	8,46	8,25	7,97
Clec12a	7,35	0,55	111,83	3,58E-07	0,0005	Clec12a				Trps1
Ms4a7	7,14	0,37	108,8	2,44E-07	0,0005	Ms4a7				Il3ra			Top 5 Downregulated	Sample Signals (log2)
Cmah	5,4	0,21	36,5	1,68E-07	0,0005	Cmah				Ms4a4c				fl/fl	fl/fl	fl/fl	fl/fl Cre+	fl/fl Cre+	fl/fl Cre+
Vnn3	3,69	0	12,88	3,08E-07	0,0005	Vnn3				Gm4951			S100a10	1,68	2,27	2,14	0,94	1,11	1,36
Mmp14	7,69	6,14	2,93	2,47E-07	0,0005	Mmp14				Cd52			Pfn1	10,69	10,92	10,74	9,69	9,73	9,81
Nfia	6,33	7,26	-1,9	1,71E-07	0,0005	Nfia				C3			Naaa	5,59	5,87	5,68	5,03	5,28	4,9
Rab3ip	3,56	4,54	-1,98	2,36E-07	0,0005	Rab3ip				Dab2
Slc12a2	7,44	8,49	-2,07	3,50E-07	0,0005	Slc12a2				Cpd
Runx3	6,33	0,13	73,67	4,18E-07	0,0006	Runx3				Pla2g7			By FDR
Mndal	6,21	0,29	60,7	4,78E-07	0,0006	Mndal				Fcgr4			Top 10	Sample Signals (log2)
Trps1	6,21	2,04	18,04	4,22E-07	0,0006	Trps1				Ccr2				fl/fl 1	fl/fl 2	fl/fl	fl/fl Cre+	fl/fl Cre+	fl/fl Cre+
Tmem221	7,01	3,38	12,39	5,31E-07	0,0006	Tmem221				Ms4a7			Ifi203	0,37	0,37	0,43	6,5	6,45	6,26
Gdf3	7,3	0,11	145,95	8,63E-07	0,0007	Gdf3				Sh3bgrl			Clec12a	0,6	0,53	0,23	7,07	7,38	7,33
Klra2	6,36	0,18	72,36	6,32E-07	0,0007	Klra2				Ybx1			Ms4a7	0,37	0,37	0,52	7,14	7,35	6,92
Plbd1	6,2	0,27	60,71	9,12E-07	0,0007	Plbd1				Zbp1			Mmp14	6,14	6,14	6,07	7,69	7,73	7,65
Cp	5,3	0,67	24,75	9,15E-07	0,0007	Cp				Cd38			Runx3	0,29	0	0,12	6,67	6,36	6,31
Cd93	4,55	0	23,42	5,78E-07	0,0007	Cd93				Dusp1			Mndal	0,29	0,2	0,61	6,29	6,21	6,12
Jag1	5,35	1,03	20,01	8,26E-07	0,0007	Jag1				Ms4a6c			Trps1	2,13	2,03	1,96	6,23	6,3	6,04
Cpne2	5,65	1,73	15,17	9,47E-07	0,0007	Cpne2				Vegfa			Klra2	0,2	0,29	0	6,63	6,33	6,2
BC064078	5,15	1,89	9,6	8,28E-07	0,0007	BC064078				Tmem106a			Plbd1	0	0,29	0,52	6,22	6,2	6,09
Gm33058	2,98	0,1	7,37	9,27E-07	0,0007	Gm33058				Sash1			Sdc4	5,33	5,34	5,44	6,94	6,87	6,92
Pde7b	2,65	0,1	5,85	7,59E-07	0,0007	Pde7b				Smpdl3a
Stom	7,22	5,1	4,35	6,28E-07	0,0007	Stom				Clec4n
Sdc4	6,91	5,33	2,99	7,89E-07	0,0007	Sdc4				Plbd1
Mcoln2	0,64	0	1,56	7,67E-07	0,0007	Mcoln2				Clec4d
Serpinb8	5,67	0,11	47,2	1,50E-06	0,0008	Serpinb8				Itgax
Ptger4	6,8	1,66	35,19	1,98E-06	0,0008	Ptger4				Gpr132
Sorbs3	6,85	1,75	34,26	1,29E-06	0,0008	Sorbs3				Anxa2
Cd36	5,41	0,34	33,73	1,40E-06	0,0008	Cd36				Emp3
Lyz2	12,77	8,37	21,17	1,54E-06	0,0008	Lyz2				Pilrb2
Lgals1	5,98	2,03	15,45	1,28E-06	0,0008	Lgals1				Hpse
Stap1	4,06	0,2	14,5	1,49E-06	0,0008	Stap1				Fam20c
Dram1	4,54	0,79	13,44	1,91E-06	0,0008	Dram1				Gatm
Qpct	4,54	1,07	11,05	1,74E-06	0,0008	Qpct				Creb5
Sh3pxd2b	4,67	1,27	10,54	1,87E-06	0,0008	Sh3pxd2b				Nlrc5
Gsn	5,36	2,37	7,94	1,83E-06	0,0008	Gsn				AW112010
Kcnn4	6,76	3,8	7,78	1,41E-06	0,0008	Kcnn4				Pfkp
Pstpip1	5,66	2,9	6,78	2,12E-06	0,0008	Pstpip1				Msr1
Ctla2b	5,68	3,58	4,3	1,85E-06	0,0008	Ctla2b				Clec12a
Tmem82	4,95	2,88	4,22	2,06E-06	0,0008	Tmem82				Rtp4
Acvrl1	7,06	5,39	3,17	2,04E-06	0,0008	Acvrl1				Emilin2
Pigz	5,04	3,41	3,1	1,61E-06	0,0008	Pigz				Slfn2
Slamf9	7,88	6,4	2,78	1,57E-06	0,0008	Slamf9				Pyhin1
Csrp1	4,37	2,94	2,69	1,10E-06	0,0008	Csrp1				Myof
Gpr183	7,18	6,1	2,11	1,76E-06	0,0008	Gpr183				Bst2
Coro7	7,49	6,44	2,07	1,18E-06	0,0008	Coro7				Lrrc8c
Sap30	4,41	3,36	2,07	1,39E-06	0,0008	Sap30				Sdc3
Akr1b10	5,18	5,78	-1,51	2,12E-06	0,0008	Akr1b10				Tap1
Golm1	9,47	10,25	-1,72	1,07E-06	0,0008	Golm1				Bhlhe40
Tle3	6,89	7,83	-1,92	1,23E-06	0,0008	Tle3				Ralgds
Cdh23	3,92	6,21	-4,92	1,35E-06	0,0008	Cdh23				Agpat4
Gpr165	2,36	5,93	-11,88	1,57E-06	0,0008	Gpr165				Bst1
Cyp4f18	6,44	0,76	51,04	2,41E-06	0,0009	Cyp4f18				Capg
Myof	5,42	0,26	35,7	2,37E-06	0,0009	Myof				Tomm7
Ahr	5,38	0,29	34	2,52E-06	0,0009	Ahr				Cxcr4
Ehd1	6,66	1,8	29,01	2,71E-06	0,0009	Ehd1				Fn1
Mrc1	8,67	4,15	22,93	2,63E-06	0,0009	Mrc1				Tnfaip2
Fam65b	5,64	3,61	4,1	2,75E-06	0,0009	Fam65b				AI662270
Nceh1	6,62	4,89	3,31	2,21E-06	0,0009	Nceh1				Lyz1
Aldh2	7,57	6,25	2,5	2,31E-06	0,0009	Aldh2				Ccl2
Cd274	5,27	4,31	1,94	2,59E-06	0,0009	Cd274				Fam26f
Plpp2	5,7	4,9	1,73	2,67E-06	0,0009	Plpp2				Tgfbi
Numb	8,77	9,98	-2,32	2,63E-06	0,0009	Numb				H2-DMa
Npl	5,29	6,79	-2,84	2,30E-06	0,0009	Npl				Grina
Mdfic	5,93	2,55	10,44	2,99E-06	0,0010	Mdfic				Ero1l
Ascl4	2,68	0,2	5,6	3,01E-06	0,0010	Ascl4				Anpep
Rgs18	2,22	0,11	4,31	3,24E-06	0,0010	Rgs18				Clic4
Zfp599	2,2	0,1	4,28	3,48E-06	0,0010	Zfp599				Oas1a
Idh2	6,42	7,21	-1,74	3,13E-06	0,0010	Idh2				Itgal
Gm10790	5,39	7,19	-3,49	3,52E-06	0,0010	Gm10790				H2-K1
Lypd6	1,18	3,43	-4,76	3,13E-06	0,0010	Lypd6				AA467197
Itgal	7,43	0,84	96,25	3,92E-06	0,0011	Itgal				Hmox1
Reps2	5,05	0,86	18,34	3,70E-06	0,0011	Reps2				Batf2
Arhgap15	5,99	2,25	13,39	3,76E-06	0,0011	Arhgap15				AI607873
Rara	3,98	0,54	10,85	4,03E-06	0,0011	Rara				Ccr1
Pxdc1	7,14	4,89	4,73	3,97E-06	0,0011	Pxdc1				Fgl2
Gm36365	6,8	8,44	-3,12	4,02E-06	0,0011	Gm36365				Mmp12
Ms4a14	5,66	0	50,64	4,28E-06	0,0012	Ms4a14				Cst7
Itga4	6,75	1,35	42,26	4,55E-06	0,0012	Itga4				Il1b
Clec4n	3,88	0	14,72	4,55E-06	0,0012	Clec4n				Cd300lf
Unc119	3,28	0,23	8,31	4,26E-06	0,0012	Unc119				Ifi204
Scimp	6,33	3,45	7,37	4,57E-06	0,0012	Scimp				Slfn1
Fos	2,82	0,87	3,87	4,56E-06	0,0012	Fos				Gbp3
Rasgef1b	6,33	5,48	1,8	4,78E-06	0,0012	Rasgef1b				Pim1
Mgll	3,27	5,06	-3,46	4,77E-06	0,0012	Mgll				Lyz2
Cxcr4	8,38	1,25	140	5,17E-06	0,0013	Cxcr4				Scimp
Slfn4	2,69	0	6,44	5,61E-06	0,0013	Slfn4				Lgals1
Galc	6,88	5,08	3,47	5,35E-06	0,0013	Galc				Slamf8
Tom1l1	3,81	6,16	-5,1	5,54E-06	0,0013	Tom1l1				H2-Ab1
Igf1	5,17	0,94	18,7	6,26E-06	0,0014	Igf1				Cd24a
Emilin2	3,74	0,41	9,99	5,79E-06	0,0014	Emilin2				Rnf213
Metrnl	5,46	3,14	4,96	6,03E-06	0,0014	Metrnl				Pla2g16
Creg2	3,09	1,35	3,34	6,24E-06	0,0014	Creg2				Cdkn1a
Pqlc1	4,96	3,8	2,23	5,88E-06	0,0014	Pqlc1				Chchd10
Fam110b	2,92	0,24	6,44	6,91E-06	0,0015	Fam110b				Sdc4
Cd79b	3,52	5,72	-4,62	6,52E-06	0,0015	Cd79b				Ccnd2
Milr1	7,3	5,54	3,38	7,71E-06	0,0016	Milr1				Pydc4
Acsl3	3,69	2,39	2,47	7,41E-06	0,0016	Acsl3				Slco3a1
Kctd17	4,1	2,86	2,36	7,46E-06	0,0016	Kctd17				Dpep2
Thbd	3,76	0,12	12,41	8,81E-06	0,0017	Thbd				Mndal
Nlrc3	4,2	0,99	9,25	8,49E-06	0,0017	Nlrc3				Plin2
Iqgap1	6,42	3,77	6,3	8,74E-06	0,0017	Iqgap1				Cxcl2
Fzd7	4,71	2,35	5,15	8,27E-06	0,0017	Fzd7				Vim
Fchsd2	6,84	7,84	-2	9,02E-06	0,0017	Fchsd2				Plaur
Slc40a1	6,13	7,14	-2	8,65E-06	0,0017	Slc40a1				Man2a1
Nav3	7,07	8,39	-2,49	7,79E-06	0,0017	Nav3				Klra2
LOC108168886	3,6	5,83	-4,69	7,97E-06	0,0017	LOC108168886				Gch1
Ppm1l	4,36	6,59	-4,7	9,05E-06	0,0017	Ppm1l				Wfdc17
Cd74	10,82	6,1	26,46	9,85E-06	0,0018	Cd74				F13a1
Dach1	4,06	0,11	15,43	9,85E-06	0,0018	Dach1				Itga4
Ccr1	7,44	3,55	14,86	9,75E-06	0,0018	Ccr1				Thbs1
Ch25h	3,75	0,36	10,48	9,57E-06	0,0018	Ch25h				Lmnb1
C920009B18Rik	4,59	1,54	8,26	9,34E-06	0,0018	C920009B18Rik				S100a10
Myo5a	7,78	4,78	8,02	9,95E-06	0,0018	Myo5a				Fgr
Clec7a	9,02	6,31	6,55	1,02E-05	0,0018	Clec7a				Cybb
Rai14	4,62	1,96	6,32	1,08E-05	0,0018	Rai14				Csf2ra
Tgfbi	9,55	7,1	5,45	1,07E-05	0,0018	Tgfbi				Rsad2
Spic	2,3	0	4,94	9,83E-06	0,0018	Spic				Anxa4
Tmem8	3,14	1,08	4,15	1,02E-05	0,0018	Tmem8				H2-D1
Trerf1	3,11	1,19	3,8	9,84E-06	0,0018	Trerf1				P2ry14
Fam189a2	1,49	0,1	2,62	1,02E-05	0,0018	Fam189a2				Pfn1
Jam3	3,84	5,31	-2,76	1,09E-05	0,0018	Jam3				Sh3bgrl3
Apobec2	0,12	1,89	-3,43	9,70E-06	0,0018	Apobec2				Slamf7
Slc39a12	2,73	4,64	-3,76	1,07E-05	0,0018	Slc39a12				Spp1
Mdfi	3,97	6,77	-6,95	9,46E-06	0,0018	Mdfi				Rnf149
F630028O10Rik	5,05	1,02	16,31	1,13E-05	0,0019	F630028O10Rik				Ifi203
Nlrc4	3,75	0,11	12,47	1,13E-05	0,0019	Nlrc4				Gsn
Slc28a2	2,84	0	7,18	1,18E-05	0,0019	Slc28a2				Il1rn
P3h2	6,88	8,45	-2,98	1,14E-05	0,0019	P3h2				Ehd1
Vim	4,6	1,95	6,25	1,26E-05	0,0020	Vim				Eif4ebp1
Adap1	6,29	5,02	2,41	1,24E-05	0,0020	Adap1				Ctsc
Pla2g7	6,92	1,65	38,76	1,34E-05	0,0021	Pla2g7				Cd36
Adam19	5,19	0,62	23,7	1,36E-05	0,0021	Adam19				Gpnmb
Acp5	4,29	0,35	15,36	1,36E-05	0,0021	Acp5				Lgals3
Ldlrad3	3,6	1,1	5,66	1,35E-05	0,0021	Ldlrad3				H2-Q6
Zc2hc1a	3,16	1,49	3,19	1,31E-05	0,0021	Zc2hc1a				Ifi27l2a
Mtmr12	5,4	4,72	1,6	1,33E-05	0,0021	Mtmr12				Ccrl2
Clec2i	4,79	1,1	12,84	1,56E-05	0,0022	Clec2i				Psen2
Sh2d1b1	4,14	1,13	8,04	1,62E-05	0,0022	Sh2d1b1				Il18bp
Mcam	3,7	1,63	4,19	1,60E-05	0,0022	Mcam				Apoe
Arpin	2,06	0,8	2,41	1,46E-05	0,0022	Arpin				Cd74
Pdgfa	6,04	5,43	1,53	1,46E-05	0,0022	Pdgfa				Igsf6
Epn2	4,65	5,43	-1,72	1,49E-05	0,0022	Epn2				Sema4a
Ecscr	7,58	9	-2,69	1,43E-05	0,0022	Ecscr				Anxa1
Thsd1	1,83	3,53	-3,24	1,41E-05	0,0022	Thsd1				Dram1
Tmc7	5,21	7,12	-3,76	1,60E-05	0,0022	Tmc7				H2-Q4
Tnfsf8	5,7	2,54	8,93	1,70E-05	0,0023	Tnfsf8				Fcgr2b
Anxa5	7,16	5,45	3,28	1,66E-05	0,0023	Anxa5				Oasl2
B4galnt1	7,69	6,78	1,88	1,67E-05	0,0023	B4galnt1				Gm12250
Rfx3	3,51	4,42	-1,88	1,71E-05	0,0023	Rfx3				Pilra
Gpr65	5,92	1,99	15,22	1,78E-05	0,0024	Gpr65				Cd40
Aph1b	4,05	2,06	3,99	1,74E-05	0,0024	Aph1b				Naaa
Mcemp1	2,28	0,4	3,7	1,84E-05	0,0024	Mcemp1				Clec7a
Ms4a6b	7,03	5,82	2,31	1,75E-05	0,0024	Ms4a6b				Msrb1
Large	6,96	7,71	-1,67	1,77E-05	0,0024	Large				Iqgap1
Antxr2	4,49	0,79	12,91	1,87E-05	0,0025	Antxr2				Cd44
Htra3	6,85	5,18	3,17	1,89E-05	0,0025	Htra3				Emb
Cxcl16	9,5	6,78	6,61	2,01E-05	0,0026	Cxcl16				Mmp14
AI504432	5,27	2,78	5,6	2,15E-05	0,0026	AI504432				Runx3
Serpinb6b	3,03	0,6	5,37	2,12E-05	0,0026	Serpinb6b				Ube2l6
Gdpd5	6,02	3,74	4,84	2,12E-05	0,0026	Gdpd5				H2-Eb1
Cox6b2	3	1,47	2,89	2,15E-05	0,0026	Cox6b2				Ier3
Glipr1	6,03	4,52	2,85	2,12E-05	0,0026	Glipr1				Lgals3bp
Blvrb	5,62	4,32	2,47	1,98E-05	0,0026	Blvrb				Pdlim7
Cit	2,88	2,09	1,73	2,03E-05	0,0026	Cit				H2-Aa
Cacna1a	5,31	4,61	1,63	2,05E-05	0,0026	Cacna1a				Rbms1
Irf4	4,05	4,91	-1,81	1,97E-05	0,0026	Irf4				Nampt
Rgs7bp	2,68	4,81	-4,36	2,01E-05	0,0026	Rgs7bp				Cxcl16
Slamf7	5,73	0,25	44,79	2,30E-05	0,0027	Slamf7				Sap30
Bmp2	2,4	0	5,29	2,31E-05	0,0027	Bmp2				Fxyd5
Stxbp6	2,35	0,53	3,55	2,26E-05	0,0027	Stxbp6				Anxa5
Ptger3	0,44	2,63	-4,55	2,29E-05	0,0027	Ptger3				Mgst1
Dab2	8,71	5,4	9,92	2,41E-05	0,0028	Dab2				Sp100
Gas7	4,59	1,49	8,53	2,52E-05	0,0028	Gas7				Mdfic
Xdh	3,6	0,53	8,44	2,41E-05	0,0028	Xdh				Cfp
Bhlhe40	5,2	2,2	7,99	2,44E-05	0,0028	Bhlhe40				Irf7
Itga8	2,73	0,64	4,26	2,43E-05	0,0028	Itga8				Cyp4f18
Cd52	9,3	7,63	3,19	2,36E-05	0,0028	Cd52				Ahnak
Eml2	3,79	2,18	3,04	2,37E-05	0,0028	Eml2				Crip1
Hoxb7	1,03	0	2,05	2,41E-05	0,0028	Hoxb7				Acp5
Lzts2	3,95	4,65	-1,62	2,47E-05	0,0028	Lzts2				Ctsb
Smap2	8,85	9,59	-1,66	2,44E-05	0,0028	Smap2				H2-Q7
Tmem144	5,18	6,21	-2,05	2,47E-05	0,0028	Tmem144
Agmo	6,44	7,48	-2,05	2,48E-05	0,0028	Agmo
Itgae	2,02	3,13	-2,16	2,50E-05	0,0028	Itgae
Nrarp	4,53	5,9	-2,59	2,50E-05	0,0028	Nrarp
Sema4g	7,28	8,72	-2,71	2,51E-05	0,0028	Sema4g
Pdpn	3,77	0,11	12,61	2,73E-05	0,0029	Pdpn
Tmem176a	9,26	7,26	4,01	2,64E-05	0,0029	Tmem176a
Foxk2	6,46	7,08	-1,53	2,73E-05	0,0029	Foxk2
Emilin1	6,07	1,62	21,83	3,00E-05	0,0030	Emilin1
Sash1	4,94	1,52	10,68	2,79E-05	0,0030	Sash1
Plxnc1	4,37	1,23	8,8	2,82E-05	0,0030	Plxnc1
Msr1	2,35	0	5,12	2,78E-05	0,0030	Msr1
Nfxl1	7,73	6,07	3,17	2,98E-05	0,0030	Nfxl1
Mpp1	6,77	5,11	3,15	2,97E-05	0,0030	Mpp1
Pea15a	8,37	7,54	1,78	2,86E-05	0,0030	Pea15a
Tlr2	6,64	5,84	1,73	2,91E-05	0,0030	Tlr2
Pirb	3,49	2,73	1,7	2,88E-05	0,0030	Pirb
Tspan7	7,23	8,29	-2,08	2,76E-05	0,0030	Tspan7
St3gal5	6,88	7,95	-2,11	3,00E-05	0,0030	St3gal5
Gimap9	1,03	2,42	-2,62	2,81E-05	0,0030	Gimap9
Gm3134	4	5,47	-2,77	2,90E-05	0,0030	Gm3134
Pde2a	4,27	7,02	-6,73	2,81E-05	0,0030	Pde2a
Dnase1l1	4,75	2,8	3,85	3,08E-05	0,0031	Dnase1l1
Fbn2	1,5	0	2,84	3,09E-05	0,0031	Fbn2
Bcl2l14	1,27	0,35	1,9	3,09E-05	0,0031	Bcl2l14
Fam3c	6,67	5,92	1,68	3,19E-05	0,0031	Fam3c
Zbtb18	5,68	6,69	-2,01	3,15E-05	0,0031	Zbtb18
Pecam1	4,56	6,97	-5,32	3,16E-05	0,0031	Pecam1
Tnfrsf17	2,08	4,87	-6,92	3,18E-05	0,0031	Tnfrsf17
Map4k1	4,17	1,83	5,08	3,28E-05	0,0032	Map4k1
Vill	3,85	1,52	5,01	3,37E-05	0,0032	Vill
Cxcr3	3,54	1,55	3,98	3,27E-05	0,0032	Cxcr3
Dse	6,59	4,87	3,31	3,34E-05	0,0032	Dse
Cyp4f16	5,2	3,6	3,04	3,28E-05	0,0032	Cyp4f16
Slc2a3	4,87	3,37	2,82	3,40E-05	0,0032	Slc2a3
Sgsh	7,24	5,75	2,81	3,28E-05	0,0032	Sgsh
H2-DMa	8	6,9	2,14	3,35E-05	0,0032	H2-DMa
Aatk	4,18	3,48	1,62	3,33E-05	0,0032	Aatk
Cd48	6,48	5,82	1,59	3,40E-05	0,0032	Cd48
Gapt	1,74	0	3,35	3,54E-05	0,0033	Gapt
Slc38a6	8,08	6,64	2,71	3,49E-05	0,0033	Slc38a6
Gadl1	1,5	2,59	-2,13	3,47E-05	0,0033	Gadl1
H2-Eb1	8,66	3,15	45,54	3,85E-05	0,0034	H2-Eb1
Slit1	4,18	1,06	8,7	3,64E-05	0,0034	Slit1
Itgb8	4,15	1,04	8,61	3,75E-05	0,0034	Itgb8
Tmem205	5,46	2,75	6,54	3,73E-05	0,0034	Tmem205
Cd200r4	3,73	1,41	5	3,68E-05	0,0034	Cd200r4
Gk	4,22	1,98	4,73	3,84E-05	0,0034	Gk
Cyp4f17	3,57	1,39	4,54	3,69E-05	0,0034	Cyp4f17
Cerkl	2,34	0,39	3,87	3,85E-05	0,0034	Cerkl
Lamb2	3,8	5,28	-2,8	3,84E-05	0,0034	Lamb2
Dusp27	2,72	4,88	-4,49	3,78E-05	0,0034	Dusp27
Ccnd2	5,35	0,67	25,66	3,96E-05	0,0035	Ccnd2
Lrrc8c	4,54	2,43	4,3	3,99E-05	0,0035	Lrrc8c
Xylt2	7,02	5,47	2,92	3,93E-05	0,0035	Xylt2
Lpcat3	6,74	7,41	-1,6	3,89E-05	0,0035	Lpcat3
Bmpr1a	3,73	4,84	-2,15	4,09E-05	0,0035	Bmpr1a
Arsg	4,73	5,93	-2,3	4,08E-05	0,0035	Arsg
Bcl9l	6,79	8,17	-2,61	3,97E-05	0,0035	Bcl9l
Hnmt	3,7	5,28	-2,99	4,06E-05	0,0035	Hnmt
AW112010	6,7	4,46	4,71	4,26E-05	0,0036	AW112010
Pcgf2	4,84	2,88	3,9	4,25E-05	0,0036	Pcgf2
F630111L10Rik	1,76	0,36	2,63	4,11E-05	0,0036	F630111L10Rik
Igf1r	4,61	6,06	-2,73	4,17E-05	0,0036	Igf1r
Rtcb	8,9	7,6	2,46	4,39E-05	0,0037	Rtcb
Gatm	7,56	6,79	1,7	4,33E-05	0,0037	Gatm
Rftn1	6,16	3,81	5,11	4,50E-05	0,0038	Rftn1
Gfra2	1,31	0,53	1,73	4,52E-05	0,0038	Gfra2
Siglec1	8,42	2,83	48,16	4,68E-05	0,0039	Siglec1
Ms4a6c	8,27	5,64	6,18	4,63E-05	0,0039	Ms4a6c
Pdcd1	7,47	5,09	5,19	4,65E-05	0,0039	Pdcd1
Apoc4	2,08	0	4,24	4,64E-05	0,0039	Apoc4
Rbbp9	5,8	6,66	-1,81	4,79E-05	0,0039	Rbbp9
Gimap1	1,96	3,63	-3,18	4,66E-05	0,0039	Gimap1
Nedd9	4,65	1,96	6,44	4,89E-05	0,0040	Nedd9
Fxyd5	6,81	4,02	6,91	5,23E-05	0,0042	Fxyd5
Bst2	9,09	6,67	5,36	5,07E-05	0,0042	Bst2
Kcnj10	7,16	5,08	4,25	5,13E-05	0,0042	Kcnj10
Rnf43	1,96	0,11	3,59	5,14E-05	0,0042	Rnf43
Prrg1	1,67	0,2	2,77	5,25E-05	0,0042	Prrg1
P2ry2	2,44	1,19	2,38	5,32E-05	0,0042	P2ry2
Tmem176b	10,59	9,39	2,3	5,28E-05	0,0042	Tmem176b
Fpr1	1,04	0	2,06	5,32E-05	0,0042	Fpr1
Thbs1	5,66	4,9	1,69	5,21E-05	0,0042	Thbs1
Calm2	8,94	9,79	-1,81	5,16E-05	0,0042	Calm2
Tet1	2,73	4	-2,41	5,16E-05	0,0042	Tet1
Gm13889	0,94	3,26	-5,01	5,26E-05	0,0042	Gm13889
Runx2	3,76	0,75	8,08	5,45E-05	0,0043	Runx2
P2ry14	2,88	0,1	6,84	5,70E-05	0,0043	P2ry14
Fam214a	6,63	4,39	4,73	5,54E-05	0,0043	Fam214a
Ezr	4,82	2,62	4,61	5,63E-05	0,0043	Ezr
Bend4	2,13	0,29	3,6	5,63E-05	0,0043	Bend4
Pfkp	3,83	2,04	3,45	5,55E-05	0,0043	Pfkp
Fam212b	2,62	1,03	3,01	5,60E-05	0,0043	Fam212b
C3ar1	9,33	8,25	2,12	5,70E-05	0,0043	C3ar1
Pdlim2	5,6	4,89	1,64	5,74E-05	0,0043	Pdlim2
Cxxc5	8,1	9,05	-1,92	5,66E-05	0,0043	Cxxc5
Klhl3	3,85	5,64	-3,45	5,50E-05	0,0043	Klhl3
Crybb1	5,94	7,95	-4,04	5,51E-05	0,0043	Crybb1
Cybb	8,24	1,68	93,89	5,77E-05	0,0044	Cybb
Plxnd1	4,64	1,74	7,49	5,98E-05	0,0044	Plxnd1
Ptpn22	4,95	2,66	4,89	5,82E-05	0,0044	Ptpn22
Emp3	6,6	5,3	2,47	5,97E-05	0,0044	Emp3
Slc44a1	6,34	5,2	2,21	5,90E-05	0,0044	Slc44a1
Siglech	9,7	10,61	-1,88	5,94E-05	0,0044	Siglech
Mlph	5,28	7,55	-4,81	5,82E-05	0,0044	Mlph
H2-Ab1	8,15	3,76	20,98	6,21E-05	0,0046	H2-Ab1
Fgf2	6,28	2,79	11,21	6,23E-05	0,0046	Fgf2
Cyfip2	5,29	2,58	6,54	6,22E-05	0,0046	Cyfip2
Wfdc17	3,5	1,16	5,08	6,33E-05	0,0046	Wfdc17
Hoxb6	0,93	0	1,91	6,33E-05	0,0046	Hoxb6
Adgrg5	3,61	0,49	8,7	6,58E-05	0,0047	Adgrg5
Gpx3	2,57	0,54	4,07	6,44E-05	0,0047	Gpx3
Robo1	1,26	0,6	1,57	6,43E-05	0,0047	Robo1
Nrm	5,76	6,55	-1,72	6,56E-05	0,0047	Nrm
Serpine2	8,91	9,98	-2,09	6,51E-05	0,0047	Serpine2
Tmem51	3,5	0,19	9,9	6,80E-05	0,0049	Tmem51
Cdkn2a	3,17	0,39	6,89	6,93E-05	0,0049	Cdkn2a
Clic4	7,56	5,11	5,48	6,91E-05	0,0049	Clic4
St3gal1	5,4	2,99	5,31	6,99E-05	0,0049	St3gal1
Lmna	4,79	3,04	3,36	7,00E-05	0,0049	Lmna
Ccng2	7,98	8,73	-1,68	6,84E-05	0,0049	Ccng2
Klhl7	4,64	5,55	-1,88	6,85E-05	0,0049	Klhl7
Prkce	4,35	5,37	-2,03	6,78E-05	0,0049	Prkce
Cdc42bpg	5,61	1,64	15,68	7,26E-05	0,0050	Cdc42bpg
Slc11a1	9,97	9,22	1,69	7,28E-05	0,0050	Slc11a1
Liph	4,95	7,55	-6,06	7,26E-05	0,0050	Liph
Iqgap2	4,38	0,69	12,95	7,40E-05	0,0051	Iqgap2
Tle1	4,57	2,76	3,49	7,48E-05	0,0051	Tle1
4930455G09Rik	1,84	0,2	3,11	7,44E-05	0,0051	4930455G09Rik
S1pr2	5,31	3,71	3,03	7,38E-05	0,0051	S1pr2
Foxp4	5,38	4,29	2,14	7,47E-05	0,0051	Foxp4
Arvcf	6,21	7,4	-2,28	7,41E-05	0,0051	Arvcf
Aoah	4,52	0,48	16,48	7,76E-05	0,0052	Aoah
Cd72	8,15	4,96	9,17	7,97E-05	0,0053	Cd72
Kynu	3,85	1,41	5,43	7,84E-05	0,0053	Kynu
Grap2	2,35	0	5,09	8,01E-05	0,0053	Grap2
Tnni3	4,63	3,26	2,59	7,82E-05	0,0053	Tnni3
Adgrg1	8,9	10,24	-2,53	8,01E-05	0,0053	Adgrg1
Vcam1	7,61	2,77	28,64	8,28E-05	0,0054	Vcam1
Pltp	5,76	3,33	5,42	8,22E-05	0,0054	Pltp
St8sia4	6,38	4,44	3,83	8,18E-05	0,0054	St8sia4
Prkca	4,76	6,16	-2,65	8,27E-05	0,0054	Prkca
H2-Aa	8,27	2,96	39,67	8,51E-05	0,0056	H2-Aa
C630043F03Rik	3,08	0,46	6,17	8,73E-05	0,0057	C630043F03Rik
Hip1	4,78	2,2	5,98	8,79E-05	0,0057	Hip1
Best1	2,86	1,51	2,54	8,86E-05	0,0057	Best1
Pfn1	9,74	10,73	-1,98	8,79E-05	0,0057	Pfn1
Ncaph	1,36	2,52	-2,23	8,74E-05	0,0057	Ncaph
Ets1	6,78	7,98	-2,3	8,82E-05	0,0057	Ets1
Igsf9	4,82	3,3	2,87	8,97E-05	0,0058	Igsf9
Bin1	10,75	11,35	-1,51	9,05E-05	0,0058	Bin1
Sall3	7,4	8,39	-1,98	9,08E-05	0,0058	Sall3
Kng2	0,9	2,51	-3,06	9,10E-05	0,0058	Kng2
Hepacam2	2,38	0	5,19	9,49E-05	0,0059	Hepacam2
Slc26a11	4,85	2,58	4,82	9,35E-05	0,0059	Slc26a11
Ctsc	9,43	7,9	2,89	9,32E-05	0,0059	Ctsc
Hdac7	3,71	2,21	2,83	9,45E-05	0,0059	Hdac7
Crtap	6,94	6,1	1,79	9,35E-05	0,0059	Crtap
Zfp395	5,47	4,67	1,75	9,27E-05	0,0059	Zfp395
Farp1	2,91	4,61	-3,26	9,22E-05	0,0059	Farp1
Gm10791	2,36	0,1	4,79	9,63E-05	0,0060	Gm10791
Tiam1	4,69	5,99	-2,45	9,62E-05	0,0060	Tiam1
Dnajb14	5,94	4,77	2,24	9,83E-05	0,0061	Dnajb14
Fam26f	4,85	4,13	1,66	9,95E-05	0,0061	Fam26f
Nhs	0,43	2,75	-5,02	0,0001	0,0061	Nhs
Stard13	1,87	0	3,65	0,0001	0,0062	Stard13
Elmo1	8,41	9,08	-1,59	0,0001	0,0062	Elmo1
Prkar1b	6,5	5,41	2,12	0,0001	0,0063	Prkar1b
Itsn1	6,52	3,23	9,78	0,0001	0,0064	Itsn1
Apoc1	1,94	0,31	3,11	0,0001	0,0064	Apoc1
Arhgef18	4,31	5,05	-1,67	0,0001	0,0064	Arhgef18
B4galt4	7,07	7,92	-1,8	0,0001	0,0064	B4galt4
Khk	5,65	6,59	-1,91	0,0001	0,0064	Khk
Hsf2bp	2,67	4,16	-2,8	0,0001	0,0064	Hsf2bp
Axl	9,19	4,07	34,88	0,0001	0,0065	Axl
Kank2	5,82	3,62	4,6	0,0001	0,0065	Kank2
Fap	2,37	0,4	3,9	0,0001	0,0065	Fap
Gcm2	1,75	0,28	2,77	0,0001	0,0065	Gcm2
Stat2	6,84	5,9	1,93	0,0001	0,0065	Stat2
Nadk	8,92	8	1,89	0,0001	0,0065	Nadk
Rtn4rl1	7,16	8,74	-2,98	0,0001	0,0065	Rtn4rl1
Gimap6	3,01	4,79	-3,43	0,0001	0,0065	Gimap6
Tmem44	5,34	7,57	-4,71	0,0001	0,0065	Tmem44
Kcnab2	4,6	1,89	6,58	0,0001	0,0067	Kcnab2
Rnf150	6,52	5,19	2,51	0,0001	0,0067	Rnf150
Limd1	4,82	3,67	2,22	0,0001	0,0067	Limd1
Hdac9	6,12	5,14	1,98	0,0001	0,0067	Hdac9
Cass4	5,15	6,45	-2,45	0,0001	0,0067	Cass4
Fgl2	7,51	4,3	9,29	0,0001	0,0068	Fgl2
Tap1	7,24	6,46	1,72	0,0001	0,0068	Tap1
Grina	9,47	8,86	1,52	0,0001	0,0068	Grina
Gm1966	5,56	3,07	5,63	0,0001	0,0069	Gm1966
Gpr176	1,96	0,2	3,4	0,0001	0,0069	Gpr176
Sorl1	6,88	5,72	2,24	0,0001	0,0069	Sorl1
Tnfrsf11a	9	8,02	1,97	0,0001	0,0069	Tnfrsf11a
Frmd8	5,14	5,92	-1,73	0,0001	0,0069	Frmd8
Rhob	10,12	11,06	-1,91	0,0001	0,0069	Rhob
Mllt4	6,2	3,48	6,57	0,0001	0,0070	Mllt4
Sh3bp4	4,01	1,79	4,68	0,0001	0,0070	Sh3bp4
Sdc3	9,12	7,47	3,13	0,0001	0,0070	Sdc3
Aqp9	1,39	0	2,62	0,0001	0,0070	Aqp9
Wwp1	6,46	5,19	2,4	0,0001	0,0070	Wwp1
Rec8	1,35	0,3	2,07	0,0001	0,0070	Rec8
Hmox1	6,4	5,43	1,95	0,0001	0,0070	Hmox1
Esyt1	7,28	6,48	1,73	0,0001	0,0070	Esyt1
Rapgef5	8,29	9,02	-1,66	0,0001	0,0070	Rapgef5
Tead3	4,03	4,97	-1,92	0,0001	0,0070	Tead3
Armcx2	3,79	4,98	-2,29	0,0001	0,0070	Armcx2
Tppp	5,31	6,74	-2,7	0,0001	0,0070	Tppp
Ncs1	2,64	4,22	-2,99	0,0001	0,0070	Ncs1
Gpr31b	5,04	1,29	13,52	0,0001	0,0071	Gpr31b
Arhgef3	4,64	3,03	3,06	0,0001	0,0071	Arhgef3
Haus8	5,43	4,05	2,62	0,0001	0,0071	Haus8
Trpm2	6,74	5,44	2,47	0,0001	0,0071	Trpm2
Cyb5r1	6,68	5,4	2,44	0,0001	0,0071	Cyb5r1
Cd63	9,58	8,39	2,29	0,0001	0,0071	Cd63
Fsd2	1,12	0	2,18	0,0001	0,0071	Fsd2
Il10rb	10,91	10,03	1,85	0,0001	0,0071	Il10rb
Zfpm1	6,55	7,16	-1,52	0,0001	0,0071	Zfpm1
Hhex	6,54	7,2	-1,58	0,0001	0,0071	Hhex
Abcg2	4,65	5,42	-1,7	0,0001	0,0071	Abcg2
Thrsp	5,36	6,26	-1,87	0,0001	0,0071	Thrsp
Engase	5,52	6,81	-2,45	0,0001	0,0071	Engase
Lrrc39	2,86	4,16	-2,46	0,0001	0,0071	Lrrc39
Igf2bp2	2,11	4,27	-4,47	0,0001	0,0071	Igf2bp2
Col14a1	2,9	0	7,46	0,0001	0,0072	Col14a1
Aplp2	7,62	6,92	1,63	0,0001	0,0072	Aplp2
Prpsap2	6,37	7,19	-1,77	0,0001	0,0072	Prpsap2
Ppp1r9a	6,41	7,46	-2,08	0,0001	0,0072	Ppp1r9a
Plcg1	5,43	6,59	-2,23	0,0001	0,0072	Plcg1
Slc2a6	6,06	2,64	10,71	0,0001	0,0073	Slc2a6
Folr2	4,19	1,74	5,45	0,0001	0,0073	Folr2
Ak8	1,51	0,1	2,65	0,0001	0,0073	Ak8
Zcchc14	4,75	5,37	-1,54	0,0001	0,0073	Zcchc14
Cds1	7,19	8,02	-1,78	0,0001	0,0073	Cds1
Mmp28	0,77	2,61	-3,57	0,0001	0,0073	Mmp28
Plin3	5,94	4,85	2,12	0,0001	0,0074	Plin3
Tpst1	5,59	4,52	2,09	0,0001	0,0075	Tpst1
Gm14461	0,67	0	1,59	0,0001	0,0075	Gm14461
Mpi	5,86	7,1	-2,35	0,0001	0,0075	Mpi
Upk1b	5,99	7,95	-3,9	0,0001	0,0075	Upk1b
Apobec1	6,67	4,68	3,96	0,0002	0,0076	Apobec1
Gp9	3,67	4,95	-2,43	0,0002	0,0076	Gp9
Snx8	7,41	6,7	1,64	0,0002	0,0077	Snx8
Efnb1	3,73	4,69	-1,95	0,0002	0,0077	Efnb1
Atp2c1	7,05	8,3	-2,37	0,0002	0,0077	Atp2c1
Jam2	5,81	7,22	-2,66	0,0002	0,0077	Jam2
C030034L19Rik	3,15	0,71	5,43	0,0002	0,0078	C030034L19Rik
Capn1	6,4	4,74	3,15	0,0002	0,0078	Capn1
H2-T-ps	1,88	0,68	2,29	0,0002	0,0078	H2-T-ps
Osgin1	5,31	4,16	2,22	0,0002	0,0078	Osgin1
Smim14	6,27	5,59	1,6	0,0002	0,0078	Smim14
Rab34	4,48	5,67	-2,28	0,0002	0,0078	Rab34
B3gnt8	5,7	3,82	3,67	0,0002	0,0079	B3gnt8
Asb2	6,9	7,7	-1,74	0,0002	0,0079	Asb2
Ms4a4c	4,51	1,75	6,82	0,0002	0,0080	Ms4a4c
Slc1a5	4,14	2,13	4,03	0,0002	0,0080	Slc1a5
Lpl	6,53	5,17	2,56	0,0002	0,0080	Lpl
Sema6b	5,25	4,42	1,78	0,0002	0,0080	Sema6b
Rgs10	9,51	10,11	-1,51	0,0002	0,0080	Rgs10
Ptpn12	3,24	3,92	-1,6	0,0002	0,0080	Ptpn12
Vopp1	1,35	2,29	-1,92	0,0002	0,0080	Vopp1
Jup	6,11	7,23	-2,18	0,0002	0,0080	Jup
Klhl38	2,58	4,46	-3,67	0,0002	0,0080	Klhl38
Ifnlr1	3,23	0,18	8,24	0,0002	0,0081	Ifnlr1
Sema4a	4,07	2,48	3	0,0002	0,0081	Sema4a
Msrb1	6,8	6,02	1,71	0,0002	0,0081	Msrb1
Tmem64	6,2	7,34	-2,19	0,0002	0,0081	Tmem64
Clec4d	2,56	0	5,89	0,0002	0,0082	Clec4d
Hgf	4,07	1,8	4,83	0,0002	0,0082	Hgf
Csf2ra	9,06	7,51	2,93	0,0002	0,0082	Csf2ra
Chic1	3,28	1,81	2,77	0,0002	0,0082	Chic1
Txndc16	7,27	5,95	2,49	0,0002	0,0082	Txndc16
Samd4	2,35	1,58	1,7	0,0002	0,0082	Samd4
Pde3b	8,81	9,49	-1,6	0,0002	0,0082	Pde3b
Rab27a	6,44	7,44	-2	0,0002	0,0082	Rab27a
Dclk2	3,32	4,38	-2,08	0,0002	0,0082	Dclk2
Nbl1	2,06	3,53	-2,76	0,0002	0,0082	Nbl1
Eva1a	2,37	4,61	-4,7	0,0002	0,0082	Eva1a
Myo18b	2,78	6,38	-12,12	0,0002	0,0082	Myo18b
Vav3	2,23	0	4,69	0,0002	0,0083	Vav3
Sema7a	1,73	0,96	1,71	0,0002	0,0083	Sema7a
Myadml2	3,13	4,25	-2,17	0,0002	0,0083	Myadml2
Prrt3	1,99	1,21	1,73	0,0002	0,0084	Prrt3
Cd300lf	6,76	2,91	14,45	0,0002	0,0085	Cd300lf
Snx29	7,13	7,8	-1,59	0,0002	0,0085	Snx29
Gmpr	4,61	5,74	-2,19	0,0002	0,0085	Gmpr
Cd38	2,18	0,11	4,2	0,0002	0,0086	Cd38
Sez6l	4	2,93	2,09	0,0002	0,0086	Sez6l
Pitpnc1	6,28	6,93	-1,57	0,0002	0,0086	Pitpnc1
Gm39888	2,03	0,1	3,79	0,0002	0,0087	Gm39888
Gla	4,44	3,24	2,3	0,0002	0,0087	Gla
Adra2a	0	1,08	-2,12	0,0002	0,0087	Adra2a
AF529169	2,73	1,23	2,84	0,0002	0,0089	AF529169
Cfp	2,99	1,93	2,09	0,0002	0,0089	Cfp
Spats2l	1,82	0,28	2,92	0,0002	0,0091	Spats2l
Cdk5r1	7,56	8,45	-1,85	0,0002	0,0091	Cdk5r1
Fuom	4,26	2,78	2,79	0,0002	0,0092	Fuom
Tbc1d8	7,76	6,67	2,12	0,0002	0,0092	Tbc1d8
Ppfibp1	4,35	3,09	2,38	0,0002	0,0094	Ppfibp1
Cecr6	1,36	0,45	1,87	0,0002	0,0094	Cecr6
Ank	8,12	7,22	1,87	0,0002	0,0094	Ank
Mfsd12	6,93	6,25	1,6	0,0002	0,0094	Mfsd12
Rab6b	5,75	6,57	-1,77	0,0002	0,0094	Rab6b
Alpk1	5,13	3,58	2,93	0,0002	0,0095	Alpk1
Xylt1	5,43	2,97	5,5	0,0002	0,0096	Xylt1
Ubxn11	3,5	1,93	2,98	0,0002	0,0096	Ubxn11
Sptbn1	6,47	5,16	2,48	0,0002	0,0096	Sptbn1
Ccdc102a	5,3	4,05	2,37	0,0002	0,0096	Ccdc102a
Fblim1	7,6	6,65	1,94	0,0002	0,0096	Fblim1
Atmin	4,22	5,15	-1,91	0,0002	0,0096	Atmin
Tmbim1	6,05	4,75	2,45	0,0002	0,0097	Tmbim1
Zmynd15	6,4	3,59	7	0,0002	0,0098	Zmynd15
H2-DMb2	6,02	4,67	2,54	0,0002	0,0098	H2-DMb2
Tgfa	5,22	6,75	-2,88	0,0002	0,0098	Tgfa
Mgst1	2,88	0,14	6,68	0,0002	0,0099	Mgst1
Zc3h12d	2,8	0,39	5,31	0,0002	0,0099	Zc3h12d
Rasgrp1	3,34	1,41	3,8	0,0002	0,0099	Rasgrp1
Fscn1	7,54	8,51	-1,96	0,0002	0,0099	Fscn1
Abcb4	4,72	5,88	-2,23	0,0002	0,0099	Abcb4
Kcnk12	3,46	4,95	-2,82	0,0002	0,0099	Kcnk12
Plxna1	5,49	3,53	3,9	0,0002	0,0100	Plxna1
Mvb12a	5,18	4,04	2,2	0,0002	0,0100	Mvb12a
Capn2	4,23	3,12	2,17	0,0002	0,0100	Capn2
Capg	5,6	4,89	1,64	0,0002	0,0100	Capg
Gm12589	0,67	0	1,59	0,0002	0,0100	Gm12589
Satb1	2,61	4,24	-3,09	0,0002	0,0100	Satb1
Fam132a	3,42	1,02	5,28	0,0003	0,0102	Fam132a
Gabbr1	5,39	6,88	-2,8	0,0002	0,0102	Gabbr1
Asph	8,53	9,62	-2,13	0,0003	0,0103	Asph
Nynrin	3,27	4,41	-2,2	0,0003	0,0103	Nynrin
Cdkn1a	6,77	4,47	4,9	0,0003	0,0105	Cdkn1a
Atrnl1	3,93	1,98	3,85	0,0003	0,0105	Atrnl1
Tm4sf5	1,97	0,21	3,38	0,0003	0,0105	Tm4sf5
Il18bp	3,6	2,53	2,1	0,0003	0,0105	Il18bp
Pilra	6,5	5,51	2	0,0003	0,0105	Pilra
P2rx4	6,36	5,4	1,94	0,0003	0,0105	P2rx4
Rab11fip1	0,89	0	1,86	0,0003	0,0105	Rab11fip1
Tmem52	6,47	5,62	1,8	0,0003	0,0105	Tmem52
Glis3	0	0,68	-1,6	0,0003	0,0105	Glis3
Snn	7,63	8,79	-2,23	0,0003	0,0105	Snn
Igfbp4	6,58	5,59	1,97	0,0003	0,0106	Igfbp4
Osbpl11	6,87	7,6	-1,65	0,0003	0,0106	Osbpl11
Slc25a37	2,37	3,11	-1,67	0,0003	0,0106	Slc25a37
Ccl2	5,8	3	6,96	0,0003	0,0107	Ccl2
Kdm2b	3,42	4,05	-1,55	0,0003	0,0107	Kdm2b
Tln2	5,49	6,21	-1,64	0,0003	0,0107	Tln2
Cpd	7,34	5,89	2,74	0,0003	0,0108	Cpd
Nme4	3,2	2,16	2,07	0,0003	0,0108	Nme4
Cx3cr1	10,3	11,68	-2,6	0,0003	0,0108	Cx3cr1
Kcna3	6,64	4,09	5,84	0,0003	0,0110	Kcna3
Tnip3	2,02	0,11	3,74	0,0003	0,0110	Tnip3
Slc41a2	1,94	0,27	3,17	0,0003	0,0110	Slc41a2
Tubb6	5,64	4,77	1,82	0,0003	0,0110	Tubb6
Smpdl3a	6,02	5,17	1,8	0,0003	0,0110	Smpdl3a
Cdca7	4,66	5,91	-2,38	0,0003	0,0110	Cdca7
Cd300ld	3,46	0,98	5,55	0,0003	0,0111	Cd300ld
Pigs	7,88	7	1,84	0,0003	0,0111	Pigs
Siglece	8,71	8,01	1,62	0,0003	0,0111	Siglece
Map3k9	5,67	6,34	-1,59	0,0003	0,0111	Map3k9
Scube1	2,25	3,54	-2,43	0,0003	0,0111	Scube1
Spp1	5,51	2,41	8,55	0,0003	0,0112	Spp1
Gucy1a3	1,12	0,12	2	0,0003	0,0112	Gucy1a3
Ptprc	7,7	7,11	1,51	0,0003	0,0112	Ptprc
Yes1	2,6	4,21	-3,05	0,0003	0,0112	Yes1
Cd44	5,34	2,24	8,6	0,0003	0,0115	Cd44
Chp2	1,96	0,18	3,44	0,0003	0,0115	Chp2
Stbd1	4,69	3,01	3,22	0,0003	0,0115	Stbd1
Gpr162	5,42	4	2,68	0,0003	0,0115	Gpr162
Slc5a10	1,19	4,29	-8,61	0,0003	0,0115	Slc5a10
Pxk	5,59	6,56	-1,96	0,0003	0,0116	Pxk
Actn1	4,46	5,9	-2,71	0,0003	0,0116	Actn1
Cux2	2,38	4,24	-3,64	0,0003	0,0116	Cux2
Tespa1	1,73	0	3,32	0,0003	0,0117	Tespa1
Clec10a	1,98	0,35	3,09	0,0003	0,0117	Clec10a
Galnt3	5,35	4,15	2,29	0,0003	0,0117	Galnt3
Eefsec	4,93	5,54	-1,53	0,0003	0,0117	Eefsec
Vis1	2,79	3,76	-1,96	0,0003	0,0117	Vis1
Dpy19l3	2,23	3,62	-2,62	0,0003	0,0117	Dpy19l3
Gstm1	4,07	3,02	2,08	0,0003	0,0118	Gstm1
Plcl1	5,42	7,01	-3,01	0,0003	0,0118	Plcl1
Sept5	2,31	1,55	1,7	0,0003	0,0119	Sept5
Mical3	4,43	5,58	-2,21	0,0003	0,0119	Mical3
Ccdc162	3,23	5,26	-4,08	0,0003	0,0119	Ccdc162
Degs1	6,63	5,94	1,61	0,0003	0,0120	Degs1
Sik2	3,69	4,31	-1,53	0,0003	0,0120	Sik2
Pxylp1	2,87	0,85	4,06	0,0003	0,0121	Pxylp1
0610038B21Rik	1,31	0,37	1,92	0,0003	0,0121	0610038B21Rik
Eps15	7,33	6,49	1,8	0,0003	0,0121	Eps15
Pml	5,58	4,77	1,75	0,0003	0,0121	Pml
Cracr2a	5,6	4,91	1,62	0,0003	0,0121	Cracr2a
Ldhb	6,52	7,51	-1,99	0,0003	0,0121	Ldhb
LOC108168194	0,11	1,23	-2,17	0,0003	0,0121	LOC108168194
Dlc1	1,09	2,57	-2,79	0,0003	0,0121	Dlc1
Tmem57	4,84	4,12	1,65	0,0003	0,0123	Tmem57
Ccl7	2,74	0,39	5,1	0,0003	0,0124	Ccl7
Tnfsf13b	7,91	6,47	2,71	0,0003	0,0124	Tnfsf13b
Gm34780	0,88	0	1,84	0,0003	0,0124	Gm34780
Hectd2	3,35	2,52	1,78	0,0003	0,0124	Hectd2
Eng	7,9	9	-2,14	0,0003	0,0124	Eng
Nos1ap	4,86	5,98	-2,17	0,0003	0,0124	Nos1ap
Fam13a	2,61	3,87	-2,38	0,0003	0,0124	Fam13a
Rab11fip4	3,49	2,2	2,45	0,0004	0,0125	Rab11fip4
Gpd2	3,51	2,46	2,06	0,0004	0,0125	Gpd2
5430437J10Rik	0,89	0	1,86	0,0004	0,0125	5430437J10Rik
Ptpru	2,24	1,36	1,84	0,0004	0,0125	Ptpru
Zfp532	5,05	5,82	-1,71	0,0004	0,0125	Zfp532
Cd4	1,93	0,12	3,51	0,0004	0,0126	Cd4
Nfkbiz	7,94	6,46	2,8	0,0004	0,0126	Nfkbiz
Tpk1	3,81	3,12	1,61	0,0004	0,0126	Tpk1
Dip2b	7,67	8,5	-1,77	0,0004	0,0126	Dip2b
Pim2	3,9	4,88	-1,98	0,0004	0,0126	Pim2
Tmem204	4,35	6,06	-3,28	0,0004	0,0126	Tmem204
Psd3	3,78	1,56	4,67	0,0004	0,0127	Psd3
Adgra3	3,45	4,68	-2,36	0,0004	0,0127	Adgra3
F830208F22Rik	3,13	1,69	2,71	0,0004	0,0128	F830208F22Rik
Aifm2	2,04	0,92	2,18	0,0004	0,0129	Aifm2
Tbc1d16	7,12	7,77	-1,57	0,0004	0,0129	Tbc1d16
Kctd12	6,6	7,38	-1,71	0,0004	0,0129	Kctd12
Trim55	1,31	0	2,48	0,0004	0,0130	Trim55
C3	5,85	1,83	16,28	0,0004	0,0131	C3
Etl4	3,59	1,54	4,14	0,0004	0,0131	Etl4
Car13	2,39	0,69	3,24	0,0004	0,0131	Car13
Lancl2	3,05	1,89	2,23	0,0004	0,0131	Lancl2
Gramd1b	6,25	5,18	2,09	0,0004	0,0131	Gramd1b
Cib1	5,49	6,2	-1,63	0,0004	0,0131	Cib1
Prickle1	2,07	2,87	-1,73	0,0004	0,0131	Prickle1
Edem1	7,35	8,31	-1,94	0,0004	0,0131	Edem1
Lox	4,53	1,8	6,63	0,0004	0,0132	Lox
Ifnar1	8,44	7,29	2,22	0,0004	0,0132	Ifnar1
Sardh	2,67	3,35	-1,6	0,0004	0,0132	Sardh
Ephb3	3,52	4,25	-1,66	0,0004	0,0132	Ephb3
Usp2	8,47	9,33	-1,81	0,0004	0,0132	Usp2
Adamts16	4,09	5,7	-3,05	0,0004	0,0132	Adamts16
Perp	0,89	2,69	-3,46	0,0004	0,0132	Perp
Slc43a1	1,15	3,22	-4,22	0,0004	0,0132	Slc43a1
Pde10a	3,99	2,38	3,06	0,0004	0,0133	Pde10a
Rab4a	1,26	2,61	-2,56	0,0004	0,0133	Rab4a
Tmem261	5,8	4,57	2,34	0,0004	0,0134	Tmem261
Rab39	5,69	6,44	-1,68	0,0004	0,0134	Rab39
Pik3r1	7,85	8,62	-1,71	0,0004	0,0134	Pik3r1
Cnn2	3,93	4,85	-1,89	0,0004	0,0134	Cnn2
Afm	0,93	1,85	-1,9	0,0004	0,0134	Afm
Lrrc75a	5,49	6,64	-2,22	0,0004	0,0134	Lrrc75a
LOC100038947	2,33	0	5,03	0,0004	0,0135	LOC100038947
Arhgap10	3,54	1,24	4,93	0,0004	0,0135	Arhgap10
Hoxb3	2,34	0,41	3,82	0,0004	0,0135	Hoxb3
Chst7	5,62	6,53	-1,88	0,0004	0,0135	Chst7
Bambi-ps1	1,78	0,26	2,87	0,0004	0,0136	Bambi-ps1
4930486L24Rik	3,07	2,16	1,87	0,0004	0,0136	4930486L24Rik
Cnrip1	3,58	4,67	-2,13	0,0004	0,0136	Cnrip1
Plin2	7,36	6,3	2,08	0,0004	0,0137	Plin2
Cd22	6,78	5,91	1,83	0,0004	0,0137	Cd22
Rasa2	3,9	3,1	1,74	0,0004	0,0137	Rasa2
Ero1l	5,44	4,79	1,57	0,0004	0,0137	Ero1l
Eid2b	3,18	3,81	-1,56	0,0004	0,0137	Eid2b
Vprbp	4,36	5,24	-1,83	0,0004	0,0137	Vprbp
LOC102632541	0	1,05	-2,07	0,0004	0,0137	LOC102632541
Ccl9	6,66	8,24	-2,99	0,0004	0,0137	Ccl9
Rab3d	4,41	2,92	2,8	0,0004	0,0138	Rab3d
Slc25a24	1,38	0	2,6	0,0004	0,0138	Slc25a24
Casc4	1,09	2,53	-2,72	0,0004	0,0138	Casc4
Tmem150b	3,72	1,61	4,31	0,0004	0,0139	Tmem150b
Smim24	4,81	3,88	1,91	0,0004	0,0139	Smim24
Slc16a10	5,11	4,5	1,52	0,0004	0,0139	Slc16a10
Cacfd1	4,89	3,98	1,89	0,0004	0,0140	Cacfd1
Slc6a6	8,42	7,8	1,54	0,0004	0,0140	Slc6a6
Ccr6	2,9	3,92	-2,03	0,0004	0,0141	Ccr6
Ltb	1,91	2,81	-1,87	0,0005	0,0142	Ltb
Shtn1	3,29	1,46	3,54	0,0005	0,0143	Shtn1
Slc16a1	4,07	4,77	-1,63	0,0005	0,0143	Slc16a1
Gm32448	2,41	0,37	4,11	0,0005	0,0144	Gm32448
Etv4	3,34	1,46	3,67	0,0005	0,0144	Etv4
H2-Bl	3,67	1,98	3,23	0,0005	0,0144	H2-Bl
H2-K2	3,97	2,88	2,13	0,0005	0,0144	H2-K2
Rasgrf1	3,02	2,03	2	0,0005	0,0144	Rasgrf1
Ccdc69	1,73	0,9	1,78	0,0005	0,0144	Ccdc69
Shcbp1l	1,49	0,79	1,62	0,0005	0,0144	Shcbp1l
Qprt	1,59	2,57	-1,98	0,0005	0,0144	Qprt
Nav2	6,28	7,29	-2	0,0005	0,0144	Nav2
Sgce	6,07	7,29	-2,32	0,0005	0,0144	Sgce
Mycl	4,77	6,36	-3	0,0005	0,0144	Mycl
Ifi204	4,86	1,95	7,49	0,0005	0,0145	Ifi204
Fcho1	3,96	2,17	3,48	0,0005	0,0145	Fcho1
Caprin2	2,06	1,35	1,64	0,0005	0,0145	Caprin2
Gm3325	1,71	2,38	-1,59	0,0005	0,0145	Gm3325
Ngfrap1	4,82	3,99	1,77	0,0005	0,0146	Ngfrap1
Sema4b	3,89	4,86	-1,96	0,0005	0,0146	Sema4b
Fgd1	1,89	0,3	3,02	0,0005	0,0147	Fgd1
Chst8	4,41	6,37	-3,9	0,0005	0,0147	Chst8
Ctsb	12,55	11,91	1,56	0,0005	0,0148	Ctsb
Alcam	2,71	0,66	4,12	0,0005	0,0149	Alcam
Lrrc4b	1,97	0,85	2,18	0,0005	0,0150	Lrrc4b
Man2a1	4,79	4	1,74	0,0005	0,0150	Man2a1
Ybx1	7,64	7,01	1,55	0,0005	0,0150	Ybx1
Hps5	7,07	6,46	1,52	0,0005	0,0150	Hps5
Slco2b1	10,51	11,1	-1,51	0,0005	0,0150	Slco2b1
Col6a3	1,2	4,26	-8,37	0,0005	0,0150	Col6a3
Lrguk	4,11	2,94	2,25	0,0005	0,0151	Lrguk
Naa35	5,87	6,75	-1,85	0,0005	0,0151	Naa35
Hspb3	4,66	5,58	-1,89	0,0005	0,0151	Hspb3
Csmd3	3,97	6,18	-4,61	0,0005	0,0151	Csmd3
F13a1	4,27	1,41	7,23	0,0005	0,0152	F13a1
Fgr	4,74	3,28	2,76	0,0005	0,0152	Fgr
Mpzl3	1,57	0,51	2,08	0,0005	0,0154	Mpzl3
Nefl	2,69	1,87	1,76	0,0005	0,0154	Nefl
Uhrf1bp1l	5,12	4,44	1,6	0,0005	0,0154	Uhrf1bp1l
Nova1	1,84	3,36	-2,88	0,0005	0,0155	Nova1
Kcnh4	4,15	1,98	4,51	0,0005	0,0156	Kcnh4
P4ha2	2,3	0,93	2,58	0,0005	0,0156	P4ha2
Marveld1	4,42	3,18	2,36	0,0005	0,0156	Marveld1
Dapp1	6,42	7,31	-1,85	0,0005	0,0156	Dapp1
Ccdc149	1,14	2,29	-2,22	0,0005	0,0156	Ccdc149
Atp8a2	7,96	9,27	-2,49	0,0005	0,0156	Atp8a2
Pnpla8	4,52	5,14	-1,53	0,0005	0,0157	Pnpla8
Palld	1,68	2,92	-2,36	0,0005	0,0157	Palld
Ube2l6	5,29	4,69	1,52	0,0005	0,0159	Ube2l6
Khdrbs3	2,05	4,05	-4	0,0005	0,0159	Khdrbs3
Marcks	6,19	6,86	-1,59	0,0006	0,0161	Marcks
Dock9	6,35	7,26	-1,88	0,0006	0,0161	Dock9
Il1rn	2,18	0,48	3,26	0,0006	0,0162	Il1rn
Slc14a1	4,92	3,36	2,96	0,0006	0,0162	Slc14a1
Atp1a3	8,26	6,89	2,58	0,0006	0,0162	Atp1a3
Pmepa1	7,63	6,7	1,91	0,0006	0,0162	Pmepa1
Itgb7	0,85	0,1	1,68	0,0006	0,0162	Itgb7
Ebi3	6,15	5,5	1,57	0,0006	0,0162	Ebi3
Ppp2r1b	6,17	6,83	-1,58	0,0006	0,0162	Ppp2r1b
Trio	8,19	8,85	-1,58	0,0006	0,0162	Trio
Stxbp5	3,73	4,62	-1,86	0,0006	0,0162	Stxbp5
Whrn	7,79	8,87	-2,11	0,0006	0,0162	Whrn
Ddah2	4,76	5,93	-2,26	0,0006	0,0162	Ddah2
Mmp15	2,45	4,1	-3,13	0,0006	0,0162	Mmp15
Nlrc5	6,08	4,05	4,07	0,0006	0,0165	Nlrc5
Adam9	6,42	5,76	1,58	0,0006	0,0167	Adam9
Otud7b	5,54	6,28	-1,67	0,0006	0,0167	Otud7b
Lpcat4	3,61	1,91	3,25	0,0006	0,0168	Lpcat4
Aldh1b1	2,6	1,11	2,81	0,0006	0,0168	Aldh1b1
Elavl2	1,53	0,78	1,68	0,0006	0,0168	Elavl2
Pde4d	2,29	3,25	-1,94	0,0006	0,0168	Pde4d
Tsku	1,57	0	2,98	0,0006	0,0169	Tsku
Synpo	1,93	0,71	2,32	0,0006	0,0169	Synpo
Cysltr2	1,07	0	2,09	0,0006	0,0169	Cysltr2
Rnf145	6,33	5,6	1,66	0,0006	0,0169	Rnf145
Frat1	3,71	4,37	-1,58	0,0006	0,0169	Frat1
Fam131a	4,49	5,34	-1,81	0,0006	0,0170	Fam131a
Prox2	3,03	4,14	-2,17	0,0006	0,0170	Prox2
Sfmbt2	1,02	3,52	-5,63	0,0006	0,0170	Sfmbt2
March3	4,46	3,8	1,58	0,0006	0,0171	March3
Gpd1	3,56	5,23	-3,17	0,0006	0,0172	Gpd1
Adam33	2,7	0,22	5,61	0,0006	0,0174	Adam33
Gpr34	9,41	10,31	-1,87	0,0006	0,0174	Gpr34
Gab3	5,44	3,33	4,31	0,0007	0,0176	Gab3
Incenp	5,44	4,47	1,95	0,0007	0,0176	Incenp
Zfp691	5,38	6,2	-1,76	0,0007	0,0176	Zfp691
Rbm38	5,97	6,91	-1,92	0,0006	0,0176	Rbm38
Asxl3	1	0,22	1,71	0,0007	0,0177	Asxl3
5730435O14Rik	0,78	1,86	-2,11	0,0007	0,0178	5730435O14Rik
Ciita	4,14	0,61	11,55	0,0007	0,0179	Ciita
Bcl2	4,02	2,76	2,38	0,0007	0,0179	Bcl2
Ptprm	6,28	7,18	-1,87	0,0007	0,0179	Ptprm
Lilra5	6,97	5,43	2,9	0,0007	0,0180	Lilra5
Atp2a1	1,02	0,11	1,87	0,0007	0,0180	Atp2a1
Zfp69	3,28	4,22	-1,91	0,0007	0,0180	Zfp69
Slc2a5	6,46	7,93	-2,78	0,0007	0,0180	Slc2a5
Rap2a	7,7	6,96	1,67	0,0007	0,0181	Rap2a
Apob	0,36	1,46	-2,14	0,0007	0,0182	Apob
Stx3	2,88	1,76	2,18	0,0007	0,0183	Stx3
Coro2a	5,4	6,26	-1,82	0,0007	0,0183	Coro2a
4833411C07Rik	6	4,24	3,4	0,0007	0,0185	4833411C07Rik
Dusp1	3,19	2,27	1,88	0,0007	0,0185	Dusp1
Zfp827	2,68	4,39	-3,27	0,0007	0,0185	Zfp827
H2-Q4	7,14	5,52	3,06	0,0007	0,0186	H2-Q4
Fut4	4,31	2,81	2,82	0,0007	0,0186	Fut4
Dnajb13	1,42	0,21	2,31	0,0007	0,0186	Dnajb13
Pbdc1	3,51	2,88	1,54	0,0007	0,0186	Pbdc1
Rasgrp3	6,47	7,1	-1,55	0,0007	0,0186	Rasgrp3
Mrc2	6,1	7,24	-2,2	0,0007	0,0186	Mrc2
2610507B11Rik	8,3	7,45	1,8	0,0007	0,0188	2610507B11Rik
Tspan9	4,68	5,5	-1,77	0,0007	0,0188	Tspan9
Car9	3,05	1,4	3,12	0,0007	0,0189	Car9
Krt80	2,07	0,52	2,94	0,0007	0,0189	Krt80
Masp1	4,15	2,79	2,56	0,0007	0,0189	Masp1
Cldn1	1,45	0,55	1,87	0,0007	0,0189	Cldn1
1190002N15Rik	6,25	5,56	1,61	0,0007	0,0189	1190002N15Rik
Glb1	7,94	7,28	1,59	0,0007	0,0189	Glb1
Casp3	5,45	6,33	-1,83	0,0007	0,0189	Casp3
Nat1	0,59	1,79	-2,29	0,0007	0,0189	Nat1
Prox1	2,91	4,48	-2,98	0,0007	0,0189	Prox1
Sestd1	3,11	0,94	4,51	0,0007	0,0190	Sestd1
Ntng1	2,35	1,21	2,2	0,0007	0,0190	Ntng1
C130050O18Rik	4,76	4,14	1,54	0,0007	0,0190	C130050O18Rik
Slc1a3	5,57	6,93	-2,57	0,0007	0,0190	Slc1a3
Icosl	8,06	7,09	1,95	0,0008	0,0191	Icosl
Rftn2	1,8	0,93	1,83	0,0008	0,0191	Rftn2
Tshz3	0,64	0	1,56	0,0008	0,0191	Tshz3
Chrna7	1,05	0,42	1,54	0,0008	0,0191	Chrna7
Cd69	2,41	0,2	4,64	0,0008	0,0192	Cd69
Fgf14	2,1	0,74	2,58	0,0008	0,0192	Fgf14
Pcnx	6,06	5,44	1,54	0,0008	0,0192	Pcnx
Uggt2	0,85	1,66	-1,76	0,0008	0,0192	Uggt2
Eogt	6,55	5,9	1,57	0,0008	0,0193	Eogt
Pde8a	2,51	1,67	1,79	0,0008	0,0194	Pde8a
Erf	7,81	8,69	-1,85	0,0008	0,0194	Erf
Dennd2d	2,69	1,36	2,51	0,0008	0,0195	Dennd2d
D17H6S56E-5	7,38	6,24	2,2	0,0008	0,0195	D17H6S56E-5
Pnma2	0,43	1,84	-2,66	0,0008	0,0195	Pnma2
Ddo	1,59	0	3,02	0,0008	0,0196	Ddo
Hacd4	6,76	5,44	2,5	0,0008	0,0196	Hacd4
Gnptab	6,82	5,8	2,03	0,0008	0,0196	Gnptab
Lrrc16a	4,47	2,54	3,81	0,0008	0,0199	Lrrc16a
Usp24	5,3	6,14	-1,79	0,0008	0,0199	Usp24
Ttc9	3,09	4,3	-2,3	0,0008	0,0199	Ttc9
Sp100	6,59	5,07	2,87	0,0008	0,0200	Sp100
Plvap	2,64	3,46	-1,76	0,0008	0,0200	Plvap
E2f1	3,67	2,31	2,57	0,0008	0,0202	E2f1
Dpp7	6,25	5,16	2,13	0,0008	0,0202	Dpp7
Cxcl14	3,71	0,6	8,59	0,0008	0,0204	Cxcl14
Map4k4	6,88	7,67	-1,73	0,0008	0,0204	Map4k4
Atp8b1	2,72	4,08	-2,57	0,0008	0,0204	Atp8b1
AI607873	7,14	2,54	24,25	0,0009	0,0205	AI607873
Frmd6	2,9	1,13	3,42	0,0008	0,0205	Frmd6
Rxrg	3,71	1,98	3,31	0,0009	0,0205	Rxrg
Ptprz1	1,33	0,6	1,65	0,0009	0,0205	Ptprz1
Pik3r5	7,2	8,16	-1,95	0,0009	0,0205	Pik3r5
Gm15880	0,47	2,01	-2,91	0,0009	0,0205	Gm15880
Foxred2	1,96	0,53	2,7	0,0009	0,0206	Foxred2
Mapkapk3	6,24	5,28	1,95	0,0009	0,0206	Mapkapk3
Snap91	2,01	1,36	1,58	0,0009	0,0206	Snap91
Lmo7	0,94	0,29	1,57	0,0009	0,0206	Lmo7
Adcy6	3,12	4,17	-2,07	0,0009	0,0206	Adcy6
Grin1	4,7	3,55	2,22	0,0009	0,0207	Grin1
Tspan33	4,93	5,52	-1,51	0,0009	0,0207	Tspan33
Mir17hg	2,71	3,6	-1,85	0,0009	0,0207	Mir17hg
Gab1	4,89	6,16	-2,4	0,0009	0,0207	Gab1
Htatip2	4,07	2,66	2,64	0,0009	0,0208	Htatip2
Pard3b	2,58	4,62	-4,11	0,0009	0,0208	Pard3b
B230217C12Rik	2,12	1,39	1,66	0,0009	0,0209	B230217C12Rik
Kcnk10	1,84	0,59	2,39	0,0009	0,0211	Kcnk10
Ets2	3,87	3	1,83	0,0009	0,0211	Ets2
Osbpl3	2,32	1,67	1,57	0,0009	0,0211	Osbpl3
Clstn1	8,68	9,3	-1,54	0,0009	0,0211	Clstn1
Zc3h12b	2	3,21	-2,32	0,0009	0,0211	Zc3h12b
Fut10	3,52	4,85	-2,52	0,0009	0,0211	Fut10
Fam212a	7,59	8,36	-1,7	0,0009	0,0213	Fam212a
Ldlr	6,14	4,66	2,79	0,0009	0,0215	Ldlr
Ccdc85c	3,93	4,85	-1,9	0,0009	0,0215	Ccdc85c
Slfn1	2,33	0,05	4,86	0,0009	0,0217	Slfn1
Ralgds	4,71	3,43	2,43	0,0009	0,0217	Ralgds
Fam161a	3,44	2,17	2,41	0,0009	0,0217	Fam161a
Gm33046	1,22	0,2	2,03	0,0009	0,0217	Gm33046
Gabra4	1,59	0,97	1,54	0,0009	0,0217	Gabra4
Ak5	0,86	0,27	1,5	0,0009	0,0217	Ak5
Trpv4	5,78	3,93	3,6	0,0010	0,0220	Trpv4
Pbxip1	5,69	4,94	1,68	0,0010	0,0221	Pbxip1
Plxna4	5,01	5,77	-1,69	0,0010	0,0222	Plxna4
Mpeg1	5,64	6,43	-1,72	0,0010	0,0222	Mpeg1
Galnt7	7,13	6,53	1,51	0,0010	0,0224	Galnt7
Anxa2	2,95	0,97	3,95	0,0010	0,0225	Anxa2
Lbh	5,86	4,93	1,91	0,0010	0,0225	Lbh
Arhgap6	2,46	0,49	3,92	0,0010	0,0226	Arhgap6
Arhgap5	7,11	7,74	-1,55	0,0010	0,0226	Arhgap5
Lrig1	3,09	0,67	5,35	0,0010	0,0228	Lrig1
Wtip	4,98	4,15	1,78	0,0010	0,0228	Wtip
Abcc8	1,29	0,38	1,89	0,0010	0,0229	Abcc8
Tfpi	5,74	6,44	-1,63	0,0010	0,0229	Tfpi
Slc4a3	3,23	1,91	2,5	0,0010	0,0231	Slc4a3
Lrfn4	1,66	0,6	2,08	0,0010	0,0231	Lrfn4
Lpin1	6,76	7,46	-1,62	0,0010	0,0231	Lpin1
Gramd4	4,04	5,29	-2,38	0,0010	0,0231	Gramd4
Oas1g	5,41	1,41	16	0,0010	0,0232	Oas1g
Ccr2	3,31	2,01	2,47	0,0010	0,0232	Ccr2
2900005J15Rik	3,86	2,94	1,89	0,0010	0,0233	2900005J15Rik
Parp16	2,25	3,24	-1,99	0,0011	0,0237	Parp16
Cd244	4,08	2,08	3,99	0,0011	0,0238	Cd244
Haao	5,94	4,94	2	0,0011	0,0238	Haao
Timp2	9,62	8,84	1,71	0,0011	0,0238	Timp2
Hlf	1,32	3,95	-6,19	0,0011	0,0238	Hlf
Pten	6,86	7,55	-1,61	0,0011	0,0239	Pten
Otud7a	2,09	1,07	2,02	0,0011	0,0240	Otud7a
Foxn2	5,2	4,23	1,97	0,0011	0,0240	Foxn2
Stab1	10,87	9,94	1,9	0,0011	0,0240	Stab1
Bach2	5,59	6,24	-1,57	0,0011	0,0240	Bach2
Ptprn2	3,5	2,25	2,39	0,0011	0,0241	Ptprn2
Jdp2	5,46	4,32	2,2	0,0011	0,0241	Jdp2
Fam20c	3,09	1,43	3,15	0,0011	0,0242	Fam20c
E2f2	2,62	1,68	1,92	0,0011	0,0242	E2f2
Wnt7b	0,98	0,39	1,51	0,0011	0,0242	Wnt7b
Bmp1	3,43	4,41	-1,97	0,0011	0,0242	Bmp1
Zfp354c	2,79	3,97	-2,26	0,0011	0,0242	Zfp354c
Gm30189	3,4	1,85	2,91	0,0011	0,0243	Gm30189
Efnb2	1,8	3,2	-2,64	0,0011	0,0243	Efnb2
Sqle	3,4	2	2,64	0,0011	0,0244	Sqle
Dennd3	3,77	3,02	1,68	0,0011	0,0244	Dennd3
Sh3d19	2,9	0,65	4,77	0,0011	0,0245	Sh3d19
2310001H17Rik	3,8	1,66	4,41	0,0011	0,0245	2310001H17Rik
Fam19a2	1,69	0,44	2,37	0,0011	0,0245	Fam19a2
Batf2	3,58	1,29	4,89	0,0011	0,0246	Batf2
4930447M23Rik	2,16	2,76	-1,51	0,0011	0,0247	4930447M23Rik
Oas1a	5,83	3,93	3,74	0,0012	0,0250	Oas1a
Asgr2	3,84	2	3,56	0,0012	0,0250	Asgr2
Ahrr	3,43	2,3	2,19	0,0012	0,0250	Ahrr
Tlr1	7,48	6,58	1,86	0,0012	0,0250	Tlr1
Ahnak2	1,32	0,43	1,86	0,0012	0,0250	Ahnak2
Lactb2	3,11	3,93	-1,76	0,0012	0,0250	Lactb2
Srl	3,84	4,75	-1,88	0,0012	0,0250	Srl
H2-K1	11,41	9,66	3,36	0,0012	0,0251	H2-K1
Hivep2	3,5	2,27	2,34	0,0012	0,0251	Hivep2
Adcy9	6,02	5,37	1,57	0,0012	0,0251	Adcy9
Nid2	5,03	6,07	-2,05	0,0012	0,0251	Nid2
LOC102641351	0,34	2,68	-5,06	0,0012	0,0251	LOC102641351
Ptpn5	2,52	1,66	1,83	0,0012	0,0253	Ptpn5
Nphp3	3,95	3,13	1,76	0,0012	0,0253	Nphp3
2610020H08Rik	1,61	1,03	1,5	0,0012	0,0253	2610020H08Rik
Bin2	8,16	8,91	-1,68	0,0012	0,0253	Bin2
6530402F18Rik	5,03	3,85	2,27	0,0012	0,0255	6530402F18Rik
Tub	1,97	1,07	1,87	0,0012	0,0255	Tub
Rhod	0,82	0,11	1,63	0,0012	0,0255	Rhod
Sh2b1	7,8	7,14	1,58	0,0012	0,0255	Sh2b1
Tmem263	0,31	1,35	-2,06	0,0012	0,0255	Tmem263
Slc25a10	5,81	4,7	2,15	0,0012	0,0256	Slc25a10
E2f8	2,42	1,63	1,72	0,0012	0,0256	E2f8
Cd40	5,25	2,04	9,25	0,0012	0,0257	Cd40
Fas	2,36	0,99	2,59	0,0012	0,0257	Fas
Gm2a	7,34	6,65	1,62	0,0012	0,0257	Gm2a
Ulbp1	2,39	1,17	2,34	0,0012	0,0258	Ulbp1
St8sia6	4,43	3,21	2,33	0,0012	0,0258	St8sia6
Cds2	8,69	9,28	-1,5	0,0012	0,0258	Cds2
Sall1	6,96	8,18	-2,33	0,0012	0,0258	Sall1
Plppr2	4,14	2,06	4,23	0,0013	0,0259	Plppr2
Nostrin	2,16	0,11	4,14	0,0013	0,0259	Nostrin
Chst1	6,67	5,35	2,49	0,0012	0,0259	Chst1
Pgap3	3,79	2,85	1,92	0,0013	0,0259	Pgap3
Lmnb1	3,58	2,88	1,63	0,0013	0,0259	Lmnb1
C1qtnf1	2,33	0,35	3,95	0,0013	0,0260	C1qtnf1
Rgs2	9,17	9,77	-1,51	0,0013	0,0260	Rgs2
Syt11	5,78	5,13	1,57	0,0013	0,0261	Syt11
Frat2	2,55	3,31	-1,7	0,0013	0,0262	Frat2
Snta1	4,26	5,4	-2,2	0,0013	0,0262	Snta1
Layn	3,18	4,26	-2,12	0,0013	0,0263	Layn
Slc35e4	3,88	2,86	2,02	0,0013	0,0264	Slc35e4
S1pr1	8,33	7,74	1,51	0,0013	0,0264	S1pr1
Lyz1	2,19	0,24	3,86	0,0013	0,0265	Lyz1
Lrrk2	1,61	0,1	2,84	0,0013	0,0265	Lrrk2
Plcl2	5,38	6,15	-1,7	0,0013	0,0265	Plcl2
L1cam	1,79	1,16	1,54	0,0013	0,0266	L1cam
Rnf217	1,75	0,37	2,61	0,0013	0,0267	Rnf217
Bcl6	6,2	5,23	1,95	0,0013	0,0268	Bcl6
Mta3	7,14	6,44	1,62	0,0013	0,0268	Mta3
Klf12	6,05	6,79	-1,67	0,0013	0,0269	Klf12
Vgf	2,91	1,96	1,94	0,0013	0,0270	Vgf
Evi5	4,64	5,42	-1,71	0,0013	0,0270	Evi5
Arhgap32	2,39	3,74	-2,56	0,0013	0,0270	Arhgap32
Gm14379	1,11	0,11	1,99	0,0013	0,0272	Gm14379
Dock5	1,04	0,21	1,77	0,0014	0,0273	Dock5
Scarb1	5,56	6,36	-1,74	0,0014	0,0273	Scarb1
Cep170b	4,53	2,9	3,11	0,0014	0,0274	Cep170b
Soat2	5,21	3,58	3,09	0,0014	0,0274	Soat2
C5ar1	6,45	5,65	1,74	0,0014	0,0276	C5ar1
Slc8b1	6,89	6,29	1,51	0,0014	0,0276	Slc8b1
Dnajc28	1,65	2,74	-2,13	0,0014	0,0276	Dnajc28
Plau	8,37	7,06	2,49	0,0014	0,0277	Plau
AI662270	2,1	0,79	2,48	0,0014	0,0277	AI662270
Gca	4,06	3,31	1,67	0,0014	0,0279	Gca
Crym	1,55	0,2	2,56	0,0014	0,0280	Crym
Ms4a8a	0,77	0	1,71	0,0014	0,0280	Ms4a8a
Slc46a3	5,66	6,32	-1,58	0,0014	0,0280	Slc46a3
Srgap2	9,41	10,1	-1,6	0,0014	0,0280	Srgap2
Gm6904	3,13	1,66	2,77	0,0014	0,0281	Gm6904
Mtrf1	4,49	3,87	1,54	0,0014	0,0281	Mtrf1
Cbfa2t3	5,37	6,28	-1,88	0,0014	0,0282	Cbfa2t3
Cdkn1c	3,2	4,3	-2,15	0,0014	0,0282	Cdkn1c
Rnf149	5,98	5,19	1,72	0,0014	0,0284	Rnf149
Foxd2	2	1,24	1,7	0,0014	0,0284	Foxd2
Parvb	5,6	4,9	1,62	0,0015	0,0285	Parvb
Rrp1b	5,59	6,28	-1,61	0,0015	0,0285	Rrp1b
LOC102632465	2,96	0,91	4,12	0,0015	0,0287	LOC102632465
Crip1	3,82	2,13	3,23	0,0015	0,0287	Crip1
Scn3b	1,76	0,73	2,05	0,0015	0,0287	Scn3b
Tnip1	7,1	6,15	1,93	0,0015	0,0287	Tnip1
Susd6	7,29	6,66	1,55	0,0015	0,0287	Susd6
Nck1	5,07	5,75	-1,6	0,0015	0,0287	Nck1
Setbp1	1,33	2,52	-2,28	0,0015	0,0287	Setbp1
Syne1	3,93	1,81	4,35	0,0015	0,0288	Syne1
Gaa	8,46	7,85	1,52	0,0015	0,0288	Gaa
Ifi27l2a	4,99	2,88	4,33	0,0015	0,0289	Ifi27l2a
Tfec	2,51	1,61	1,87	0,0015	0,0289	Tfec
Nampt	6	5,25	1,69	0,0015	0,0289	Nampt
Smim1	1,73	2,85	-2,18	0,0015	0,0289	Smim1
Prr5l	5,99	4,75	2,36	0,0015	0,0291	Prr5l
Zfp354a	2,92	4,23	-2,48	0,0015	0,0291	Zfp354a
Tmem132b	2,4	1,69	1,64	0,0015	0,0293	Tmem132b
Mylip	8,19	9	-1,75	0,0015	0,0293	Mylip
Egr1	5,44	3,99	2,72	0,0015	0,0294	Egr1
Tbc1d12	5,23	4,28	1,93	0,0015	0,0295	Tbc1d12
Dgkz	8,51	7,78	1,65	0,0015	0,0295	Dgkz
Fgf11	3,48	5,02	-2,89	0,0015	0,0295	Fgf11
Hcar2	4,2	1,28	7,56	0,0016	0,0296	Hcar2
Plec	3,79	3,1	1,62	0,0016	0,0297	Plec
Sept9	4,41	3,78	1,55	0,0016	0,0297	Sept9
Ifi44	4,5	0,15	20,32	0,0016	0,0298	Ifi44
Hs3st1	2,92	0,4	5,7	0,0016	0,0298	Hs3st1
Tmem231	3,03	2,1	1,9	0,0016	0,0298	Tmem231
Cmya5	1,13	2,24	-2,15	0,0016	0,0299	Cmya5
Scpep1	7,01	6,28	1,66	0,0016	0,0300	Scpep1
Anxa4	6,28	5,52	1,69	0,0016	0,0301	Anxa4
Syne3	0,96	0,21	1,68	0,0016	0,0301	Syne3
Gm30789	3,26	4,73	-2,77	0,0016	0,0301	Gm30789
Tjp3	2,52	0,81	3,26	0,0016	0,0303	Tjp3
Rarg	3,26	1,77	2,79	0,0016	0,0303	Rarg
Dna2	2,92	1,91	2,02	0,0016	0,0303	Dna2
Lrp6	7,41	6,45	1,95	0,0016	0,0303	Lrp6
5031425F14Rik	1,92	1,15	1,71	0,0016	0,0303	5031425F14Rik
Gadd45g	6,2	5,45	1,68	0,0016	0,0303	Gadd45g
Asic4	1,16	0,55	1,53	0,0016	0,0303	Asic4
Cadm1	8,66	8,05	1,53	0,0016	0,0303	Cadm1
Itgax	7,56	5,42	4,42	0,0016	0,0305	Itgax
Dgkb	2,39	1,21	2,25	0,0016	0,0305	Dgkb
Nr3c2	3,05	3,98	-1,9	0,0016	0,0305	Nr3c2
Mmp23	3	3,88	-1,85	0,0017	0,0306	Mmp23
Psen2	6,49	5,76	1,66	0,0017	0,0307	Psen2
Zswim5	1,22	3,17	-3,87	0,0017	0,0310	Zswim5
Anln	3,4	1,66	3,34	0,0017	0,0312	Anln
Eef2k	6,52	7,42	-1,87	0,0017	0,0312	Eef2k
Bcar3	3,48	1,34	4,41	0,0017	0,0314	Bcar3
Lmntd2	1,91	1,11	1,74	0,0017	0,0315	Lmntd2
Sik1	3,48	2,03	2,73	0,0017	0,0316	Sik1
Slfn2	7,1	5,94	2,22	0,0017	0,0316	Slfn2
Ppp2r5b	5,18	4,52	1,57	0,0017	0,0316	Ppp2r5b
Bcl3	5,27	3,39	3,68	0,0017	0,0317	Bcl3
Stim2	5,43	4,71	1,65	0,0018	0,0317	Stim2
LOC108167662	0,21	0,97	-1,69	0,0018	0,0317	LOC108167662
Cmtm6	9,15	9,95	-1,74	0,0017	0,0317	Cmtm6
Strip2	1,32	0,61	1,64	0,0018	0,0318	Strip2
Tspan32	5,79	4,89	1,87	0,0018	0,0319	Tspan32
Ikzf2	1,29	2,01	-1,65	0,0018	0,0319	Ikzf2
Slamf1	3,36	4,11	-1,68	0,0018	0,0321	Slamf1
Pdlim7	4,35	1,92	5,42	0,0018	0,0322	Pdlim7
Creb5	2,31	1,5	1,76	0,0018	0,0322	Creb5
Man1a	6,68	7,3	-1,54	0,0018	0,0322	Man1a
LOC102639543	3,3	0,75	5,84	0,0018	0,0323	LOC102639543
Clec4b1	1,26	0	2,39	0,0018	0,0323	Clec4b1
Hmga2-ps1	6,46	7,23	-1,72	0,0018	0,0323	Hmga2-ps1
LOC108168817	2,26	1,33	1,9	0,0018	0,0328	LOC108168817
Prkx	5,06	5,76	-1,63	0,0018	0,0328	Prkx
H2-D1	10,92	9,34	2,98	0,0019	0,0329	H2-D1
Syt8	1,93	0,74	2,29	0,0019	0,0329	Syt8
Cnot8	7,05	7,68	-1,54	0,0019	0,0329	Cnot8
Bnc2	0,84	1,95	-2,15	0,0019	0,0329	Bnc2
Plekhg3	2,24	0,53	3,27	0,0019	0,0330	Plekhg3
Rbbp8	4,09	3,04	2,07	0,0019	0,0330	Rbbp8
Tbc1d4	3,74	4,55	-1,75	0,0019	0,0330	Tbc1d4
Sdk1	4,91	6,04	-2,18	0,0019	0,0333	Sdk1
Fam234a	6,09	5,13	1,94	0,0019	0,0334	Fam234a
Usp13	0,93	0,1	1,77	0,0019	0,0334	Usp13
Mfsd7a	5,2	4,4	1,75	0,0019	0,0334	Mfsd7a
Rhbdf2	6,88	6,23	1,57	0,0019	0,0334	Rhbdf2
Tal1	4,94	5,59	-1,57	0,0019	0,0334	Tal1
Fam72a	2,83	3,5	-1,59	0,0019	0,0334	Fam72a
Ggps1	6,24	6,99	-1,68	0,0019	0,0334	Ggps1
Zcwpw1	2,43	3,39	-1,94	0,0019	0,0334	Zcwpw1
Siglecg	0,89	1,98	-2,12	0,0019	0,0334	Siglecg
Postn	1,12	2,29	-2,24	0,0019	0,0334	Postn
Fcgr4	6,01	4,33	3,2	0,0019	0,0335	Fcgr4
Cbr2	3,02	1,46	2,96	0,0019	0,0335	Cbr2
Arl5c	6,61	4,78	3,55	0,0020	0,0336	Arl5c
Dock6	4,89	4,1	1,73	0,0020	0,0340	Dock6
Ifit2	2,09	1,46	1,56	0,0020	0,0341	Ifit2
Mob3b	2,61	0,68	3,8	0,0020	0,0343	Mob3b
H2-Q5	7,19	5,32	3,65	0,0020	0,0343	H2-Q5
Flt1	2,03	0,99	2,05	0,0020	0,0343	Flt1
Svop	1,91	1,02	1,86	0,0020	0,0343	Svop
Chrna4	1,68	0,8	1,84	0,0020	0,0343	Chrna4
Sesn1	7,59	6,97	1,53	0,0020	0,0343	Sesn1
Fkbp7	3,45	4,19	-1,67	0,0020	0,0343	Fkbp7
N4bp3	2,27	0,76	2,85	0,0020	0,0345	N4bp3
Znrf3	5,45	4,55	1,86	0,0020	0,0345	Znrf3
Myo16	1,3	0,54	1,69	0,0020	0,0345	Myo16
Tpbgl	5,52	6,67	-2,22	0,0020	0,0345	Tpbgl
Csmd1	1,86	0,68	2,27	0,0021	0,0346	Csmd1
Slc22a18	1,67	0,62	2,08	0,0021	0,0346	Slc22a18
Sft2d2	9,25	9,96	-1,64	0,0021	0,0346	Sft2d2
LOC102638940	1,76	1,1	1,58	0,0021	0,0347	LOC102638940
Ift43	2,47	1,85	1,53	0,0021	0,0347	Ift43
Tbx19	0,81	2,43	-3,07	0,0021	0,0347	Tbx19
Plk3	6,87	5,32	2,91	0,0021	0,0348	Plk3
Asb10	3,89	4,76	-1,83	0,0021	0,0348	Asb10
Lrtm2	2,21	1,13	2,11	0,0021	0,0349	Lrtm2
Pgap1	3,75	2,38	2,59	0,0021	0,0350	Pgap1
Synj2	7,04	6,11	1,91	0,0021	0,0350	Synj2
Sdr39u1	2,19	1,55	1,56	0,0021	0,0350	Sdr39u1
Nradd	4,14	4,88	-1,67	0,0021	0,0350	Nradd
Endou	0,68	0	1,6	0,0021	0,0352	Endou
Csnk1e	6,05	6,76	-1,64	0,0021	0,0353	Csnk1e
Tnfaip2	6,61	5,71	1,87	0,0021	0,0354	Tnfaip2
Tec	6,69	6,06	1,54	0,0021	0,0354	Tec
Exog	4,38	5,16	-1,71	0,0022	0,0354	Exog
Fam171a1	0,79	1,69	-1,87	0,0021	0,0354	Fam171a1
Atp6v0a2	6,83	7,78	-1,94	0,0022	0,0355	Atp6v0a2
Ccdc171	1,77	1,16	1,53	0,0022	0,0360	Ccdc171
Sstr4	2,39	1,15	2,37	0,0022	0,0361	Sstr4
Col4a1	1,44	0,61	1,78	0,0022	0,0361	Col4a1
Afap1l1	6,14	7,19	-2,07	0,0022	0,0361	Afap1l1
Ptger2	1,17	0,11	2,09	0,0023	0,0366	Ptger2
Creb3l2	5,75	6,47	-1,65	0,0023	0,0366	Creb3l2
Rpgrip1	1,06	0,35	1,63	0,0023	0,0369	Rpgrip1
Ptprj	9,27	8,68	1,5	0,0023	0,0372	Ptprj
Iffo1	8,43	9,14	-1,64	0,0023	0,0373	Iffo1
2700081O15Rik	3,56	4,4	-1,79	0,0023	0,0373	2700081O15Rik
Phlda3	2,34	0,6	3,33	0,0023	0,0376	Phlda3
Tmcc2	4,18	2,95	2,35	0,0023	0,0376	Tmcc2
Habp4	4,44	3,66	1,72	0,0023	0,0376	Habp4
Rnase2a	0,65	0	1,57	0,0023	0,0376	Rnase2a
Slc5a5	0,67	1,74	-2,09	0,0023	0,0376	Slc5a5
Ptpn7	2,23	0,78	2,73	0,0024	0,0378	Ptpn7
Ttyh2	5,64	4,9	1,67	0,0024	0,0378	Ttyh2
Stk17b	5,8	5,19	1,53	0,0024	0,0378	Stk17b
Fzd8	0,21	0,85	-1,56	0,0024	0,0378	Fzd8
Resp18	1,22	0,52	1,64	0,0024	0,0380	Resp18
Eif4g2	7,9	8,51	-1,53	0,0024	0,0380	Eif4g2
Zbtb16	2,56	0,6	3,9	0,0024	0,0381	Zbtb16
Kcnd1	7,05	7,91	-1,83	0,0024	0,0382	Kcnd1
Oas2	7,59	2,98	24,43	0,0024	0,0387	Oas2
Sh3bgrl	4,46	2,94	2,86	0,0024	0,0387	Sh3bgrl
Irs2	6,3	5,21	2,14	0,0024	0,0387	Irs2
Adamtsl2	2,72	3,74	-2,04	0,0024	0,0387	Adamtsl2
Irak3	4,46	3,46	1,99	0,0025	0,0388	Irak3
Mocos	1,34	0,2	2,2	0,0025	0,0389	Mocos
Tmem106a	5,2	4,46	1,67	0,0025	0,0389	Tmem106a
Nbea	4,34	5,04	-1,62	0,0025	0,0389	Nbea
Unc5cl	1,92	3,26	-2,52	0,0025	0,0389	Unc5cl
Lgi4	3,28	4,84	-2,96	0,0025	0,0389	Lgi4
Cd300lb	2,3	1,29	2,02	0,0025	0,0390	Cd300lb
9330179D12Rik	0,69	0	1,61	0,0025	0,0390	9330179D12Rik
Aim1	1,86	1,2	1,58	0,0025	0,0391	Aim1
Mertk	7,04	7,69	-1,58	0,0025	0,0392	Mertk
Cdr2	2,84	1,47	2,59	0,0025	0,0393	Cdr2
Klra17	0,59	0	1,51	0,0025	0,0393	Klra17
Hoxb4	4,45	3,23	2,33	0,0025	0,0394	Hoxb4
Galm	4,51	5,28	-1,71	0,0025	0,0395	Galm
Zfp57	0,56	1,54	-1,98	0,0025	0,0395	Zfp57
Neurl1b	4,44	3,32	2,18	0,0025	0,0396	Neurl1b
Rhoq	6,48	7,22	-1,67	0,0026	0,0396	Rhoq
Lbx2	0,66	1,43	-1,71	0,0026	0,0396	Lbx2
Lrig3	4,01	4,82	-1,76	0,0026	0,0397	Lrig3
Zfyve9	3,08	3,8	-1,65	0,0026	0,0401	Zfyve9
Bahcc1	3,68	4,86	-2,28	0,0026	0,0401	Bahcc1
Elavl4	2,55	4,12	-2,96	0,0026	0,0401	Elavl4
Gpr132	2,64	0,24	5,25	0,0026	0,0402	Gpr132
Diaph1	7,37	6,31	2,09	0,0026	0,0402	Diaph1
Nrp1	7,67	6,65	2,02	0,0026	0,0402	Nrp1
Atad2	3,3	2,37	1,9	0,0026	0,0402	Atad2
Plekho1	8,84	9,43	-1,51	0,0026	0,0402	Plekho1
2610528A11Rik	2,78	3,52	-1,67	0,0026	0,0403	2610528A11Rik
Vangl2	4,05	4,94	-1,85	0,0026	0,0404	Vangl2
Il10	0,97	0	1,96	0,0026	0,0405	Il10
Marveld2	2,46	3,37	-1,88	0,0026	0,0405	Marveld2
Cpox	4,54	5,14	-1,51	0,0027	0,0409	Cpox
Raet1d	0,72	0	1,65	0,0027	0,0410	Raet1d
Atp2a3	4,79	4,07	1,66	0,0027	0,0411	Atp2a3
Fam102b	8,27	8,89	-1,54	0,0027	0,0411	Fam102b
Fkbp11	0,37	1,04	-1,6	0,0027	0,0411	Fkbp11
Man1a2	6,23	6,86	-1,55	0,0027	0,0412	Man1a2
Tspan13	5,67	6,55	-1,83	0,0027	0,0412	Tspan13
Col27a1	5,81	7,03	-2,33	0,0027	0,0413	Col27a1
Cox6a2	3,48	2,31	2,25	0,0027	0,0414	Cox6a2
Arl15	4,18	4,79	-1,53	0,0027	0,0414	Arl15
Itgb3	5,72	6,67	-1,93	0,0027	0,0414	Itgb3
Nt5e	2,24	0,33	3,74	0,0028	0,0418	Nt5e
Gria4	2,11	1,35	1,7	0,0028	0,0418	Gria4
Gem	1,34	2,28	-1,91	0,0028	0,0418	Gem
Gm34483	1,17	0,11	2,08	0,0028	0,0419	Gm34483
Gclc	5,77	6,43	-1,58	0,0028	0,0423	Gclc
Cfh	9,95	10,66	-1,63	0,0028	0,0423	Cfh
Rgs11	2,94	1,3	3,11	0,0028	0,0425	Rgs11
Tmem132a	4,85	4,03	1,76	0,0028	0,0425	Tmem132a
Iqch	0,11	1,14	-2,04	0,0028	0,0425	Iqch
Nrros	4,97	4,11	1,82	0,0029	0,0426	Nrros
Shb	4	4,6	-1,52	0,0029	0,0426	Shb
Dennd4a	6,96	7,77	-1,75	0,0029	0,0426	Dennd4a
Klf15	0,21	1,01	-1,75	0,0029	0,0427	Klf15
Fam131b	2,42	1,2	2,33	0,0029	0,0430	Fam131b
Eif4ebp1	5,04	4,11	1,91	0,0029	0,0430	Eif4ebp1
Med12l	4,61	5,34	-1,65	0,0029	0,0430	Med12l
Acvr2b	5,27	6,06	-1,72	0,0029	0,0430	Acvr2b
Myo6	2,81	4,45	-3,12	0,0029	0,0430	Myo6
Gpnmb	2,07	0,1	3,92	0,0029	0,0431	Gpnmb
Ahnak	2,34	0,4	3,85	0,0029	0,0432	Ahnak
Cep128	3,7	2,62	2,11	0,0029	0,0432	Cep128
Sparc	11,32	12,4	-2,12	0,0030	0,0433	Sparc
Mlxipl	8,26	9,15	-1,84	0,0030	0,0434	Mlxipl
Racgap1	4,42	3,7	1,64	0,0030	0,0435	Racgap1
Marcksl1	3,19	2,27	1,9	0,0030	0,0437	Marcksl1
Smyd2	3,81	3,19	1,54	0,0030	0,0437	Smyd2
Akirin2	7,37	8,11	-1,67	0,0030	0,0437	Akirin2
LOC105246961	2,96	3,73	-1,7	0,0030	0,0437	LOC105246961
Cyth1	6,53	5,67	1,81	0,0030	0,0438	Cyth1
Tmod3	3,79	4,38	-1,51	0,0030	0,0438	Tmod3
Ccl8	1,72	0	3,3	0,0030	0,0439	Ccl8
F730043M19Rik	3,17	1,99	2,27	0,0030	0,0441	F730043M19Rik
Bmi1	4,55	5,22	-1,59	0,0031	0,0445	Bmi1
LOC102637283	0,8	0	1,74	0,0031	0,0449	LOC102637283
Vps13c	5,79	5,05	1,67	0,0031	0,0449	Vps13c
Glul	8,49	9,14	-1,57	0,0031	0,0449	Glul
Dnaja4	2,9	3,97	-2,1	0,0031	0,0449	Dnaja4
Atcay	2,12	1,43	1,61	0,0031	0,0450	Atcay
Pkp4	4,83	5,5	-1,59	0,0031	0,0450	Pkp4
Eepd1	5,25	6,17	-1,88	0,0031	0,0451	Eepd1
Pear1	5,12	5,71	-1,51	0,0031	0,0453	Pear1
Tanc2	10,08	10,75	-1,59	0,0031	0,0454	Tanc2
Ccl12	8,59	5,94	6,28	0,0032	0,0456	Ccl12
Rcor2	1,83	0,69	2,21	0,0032	0,0456	Rcor2
Zfp354b	2,19	3,29	-2,15	0,0032	0,0456	Zfp354b
LOC108167986	0,11	1,03	-1,89	0,0032	0,0457	LOC108167986
Tnik	3,6	1,53	4,21	0,0032	0,0459	Tnik
Mmp13	0,8	0	1,74	0,0032	0,0460	Mmp13
Bckdha	7,09	7,68	-1,51	0,0032	0,0460	Bckdha
Dnase1l3	2,19	0,73	2,75	0,0032	0,0462	Dnase1l3
Ccl6	6,68	7,38	-1,63	0,0032	0,0462	Ccl6
Duoxa1	2,23	3,64	-2,65	0,0033	0,0463	Duoxa1
A330023F24Rik	3,34	2,49	1,8	0,0033	0,0467	A330023F24Rik
Me3	0,9	0,29	1,53	0,0033	0,0467	Me3
Ric3	4,28	5,12	-1,79	0,0033	0,0469	Ric3
Unc13a	2,91	1,73	2,26	0,0033	0,0470	Unc13a
Flot2	6,15	5,55	1,51	0,0033	0,0470	Flot2
Fbxw17	3,88	2,08	3,47	0,0034	0,0471	Fbxw17
Rilpl1	6,53	7,42	-1,85	0,0034	0,0471	Rilpl1
LOC108167784	1,48	0,47	2,02	0,0034	0,0472	LOC108167784
Gspt1	6,83	7,72	-1,85	0,0034	0,0475	Gspt1
Chac1	2,86	0,6	4,79	0,0034	0,0478	Chac1
Nrep	2,52	4,09	-2,97	0,0034	0,0479	Nrep
Dck	4,56	3,71	1,8	0,0034	0,0480	Dck
Dok3	8,43	7,72	1,64	0,0035	0,0481	Dok3
Zfp462	1,16	0,48	1,61	0,0035	0,0481	Zfp462
Cdc42ep1	0,31	1,69	-2,61	0,0034	0,0481	Cdc42ep1
Ppp1r1a	1,27	0,22	2,07	0,0035	0,0483	Ppp1r1a
Wscd2	2,92	1,9	2,02	0,0035	0,0483	Wscd2
Akr1c12	0,63	0	1,55	0,0035	0,0485	Akr1c12
Fcna	1,05	0,44	1,53	0,0035	0,0486	Fcna
Plxdc2	10,14	10,86	-1,64	0,0035	0,0489	Plxdc2
2500002B13Rik	3,16	1,7	2,75	0,0036	0,0491	2500002B13Rik
Dclk1	1,78	1,04	1,66	0,0036	0,0491	Dclk1
Cdca7l	3	1,45	2,92	0,0036	0,0497	Cdca7l
Acot9	5,81	4,96	1,8	0,0036	0,0497	Acot9
Bambi	2,18	1,53	1,58	0,0036	0,0497	Bambi
Agrn	3,6	2,97	1,54	0,0036	0,0497	Agrn
Bcat1	1,29	1,98	-1,62	0,0036	0,0497	Bcat1
Tspan18	3,97	4,97	-2	0,0036	0,0497	Tspan18
Trim59	2,96	1,26	3,25	0,0036	0,0498	Trim59
Cxcl2	1,04	0	2,06	0,0036	0,0498	Cxcl2
1110008P14Rik	2,22	1,37	1,81	0,0037	0,0498	1110008P14Rik
Ms4a4b	0,94	0,11	1,78	0,0036	0,0498	Ms4a4b
A230056P14Rik	1,66	2,5	-1,79	0,0036	0,0498	A230056P14Rik
Icos	1,58	2,85	-2,4	0,0036	0,0498	Icos
Ctsd	15,16	14,45	1,64	0,0037	0,0499	Ctsd
Ackr3	0,65	2,03	-2,6	0,0037	0,0502	Ackr3
Soat1	6,25	5,51	1,67	0,0037	0,0504	Soat1
Bst1	3,36	0,73	6,23	0,0038	0,0507	Bst1
Pparg	1,09	0	2,13	0,0038	0,0507	Pparg
St7	4,63	3,57	2,08	0,0037	0,0507	St7
Dscaml1	2,13	1,51	1,54	0,0038	0,0507	Dscaml1
Ier3	2,55	1,44	2,17	0,0038	0,0508	Ier3
Slc15a3	8,5	7,59	1,89	0,0038	0,0508	Slc15a3
4933412E12Rik	2,8	3,56	-1,68	0,0038	0,0508	4933412E12Rik
Pydc4	6,01	1,52	22,41	0,0038	0,0509	Pydc4
Dhx58	6,23	5,4	1,78	0,0038	0,0509	Dhx58
Mex3d	4,77	5,36	-1,5	0,0038	0,0509	Mex3d
Fzd4	5,63	6,25	-1,53	0,0038	0,0509	Fzd4
Fuk	2,93	3,6	-1,59	0,0038	0,0509	Fuk
Ptpn14	0,09	1,24	-2,22	0,0038	0,0509	Ptpn14
Lgals3	3,17	1,21	3,91	0,0038	0,0510	Lgals3
Enpp4	6,26	5,28	1,98	0,0038	0,0510	Enpp4
Mmp25	2,72	0,96	3,39	0,0038	0,0511	Mmp25
Mras	5	6,04	-2,05	0,0038	0,0511	Mras
Nlgn1	1,69	0,75	1,93	0,0038	0,0512	Nlgn1
Tpd52	7,97	7,3	1,59	0,0038	0,0512	Tpd52
Il1b	4,43	2,4	4,08	0,0039	0,0513	Il1b
Rab36	3,09	1,71	2,61	0,0039	0,0513	Rab36
Insig1	4,63	3,91	1,64	0,0039	0,0513	Insig1
Cdc42bpa	2,64	3,32	-1,61	0,0039	0,0514	Cdc42bpa
Nrbp2	4,75	3,18	2,96	0,0039	0,0515	Nrbp2
Piwil2	1,65	0,41	2,36	0,0039	0,0515	Piwil2
Gm20324	1,96	1,12	1,79	0,0039	0,0515	Gm20324
Plekhg5	5,06	4,27	1,73	0,0039	0,0515	Plekhg5
Hsf4	1,95	0,31	3,1	0,0039	0,0518	Hsf4
Relb	1,66	0,8	1,82	0,0040	0,0521	Relb
Batf	3,33	2,53	1,73	0,0040	0,0526	Batf
Natd1	5,46	6,12	-1,59	0,0040	0,0527	Natd1
Maged2	2,99	3,83	-1,79	0,0040	0,0527	Maged2
Cnksr2	2,36	1,4	1,95	0,0040	0,0528	Cnksr2
Pcdh1	3,33	2,64	1,61	0,0041	0,0531	Pcdh1
Lsamp	3,02	2,19	1,79	0,0041	0,0534	Lsamp
Ndst1	6,6	5,98	1,54	0,0041	0,0535	Ndst1
Chpf	2,61	1,33	2,43	0,0041	0,0537	Chpf
Pqlc3	3,84	2,55	2,44	0,0041	0,0538	Pqlc3
Slc6a9	4	3,17	1,78	0,0041	0,0538	Slc6a9
Klhl13	3,56	2,94	1,54	0,0041	0,0538	Klhl13
LOC105246186	1,07	0	2,09	0,0042	0,0539	LOC105246186
Ntrk3	3,35	2,6	1,68	0,0042	0,0539	Ntrk3
Rgs14	5,45	4,84	1,53	0,0042	0,0539	Rgs14
Rassf3	5,29	4,36	1,91	0,0042	0,0542	Rassf3
Akap10	5,68	5,07	1,53	0,0042	0,0542	Akap10
Pstpip2	3,1	1,69	2,67	0,0042	0,0544	Pstpip2
Dclre1c	7,7	7,11	1,51	0,0042	0,0544	Dclre1c
S1pr4	3,72	4,42	-1,62	0,0042	0,0544	S1pr4
Ocln	2,03	3,05	-2,03	0,0042	0,0544	Ocln
Cercam	4,04	3	2,06	0,0043	0,0547	Cercam
Dscam	1,1	0,44	1,58	0,0043	0,0547	Dscam
Eps8	3,77	2,16	3,04	0,0043	0,0549	Eps8
Athl1	4,65	3,69	1,94	0,0043	0,0549	Athl1
Wdr78	0,55	1,16	-1,53	0,0043	0,0550	Wdr78
Msrb2	5,47	6,26	-1,73	0,0043	0,0550	Msrb2
Mmgt1	4,47	5,19	-1,65	0,0043	0,0552	Mmgt1
Ccdc8	2,71	3,71	-1,99	0,0044	0,0556	Ccdc8
Tmem123	7,98	7,36	1,54	0,0044	0,0562	Tmem123
Stard10	1,75	0,58	2,26	0,0044	0,0563	Stard10
Car11	3,7	2,97	1,65	0,0045	0,0566	Car11
Dapk1	5,81	5,07	1,67	0,0045	0,0569	Dapk1
Tor3a	6,74	6,07	1,59	0,0045	0,0569	Tor3a
Coro6	4,2	3,06	2,21	0,0045	0,0570	Coro6
Klhl36	5,25	5,89	-1,56	0,0045	0,0570	Klhl36
Dgat2	2,13	0,86	2,41	0,0045	0,0571	Dgat2
Tm4sf19	1,24	0,11	2,19	0,0045	0,0571	Tm4sf19
Smc4	3,68	2,83	1,8	0,0045	0,0571	Smc4
4933432I03Rik	0,87	0,11	1,7	0,0045	0,0571	4933432I03Rik
Nudt12	0,91	2,07	-2,23	0,0045	0,0571	Nudt12
Smco4	2,52	1,69	1,77	0,0045	0,0572	Smco4
Prkcq	1,64	2,36	-1,65	0,0046	0,0578	Prkcq
Mir8120	1,35	0,19	2,23	0,0046	0,0580	Mir8120
Asns	2,37	1,05	2,5	0,0046	0,0581	Asns
Srxn1	2,39	1,39	2	0,0047	0,0583	Srxn1
4933421O10Rik	2,55	3,22	-1,6	0,0047	0,0583	4933421O10Rik
Gm16702	0,96	1,76	-1,74	0,0047	0,0583	Gm16702
Slc26a10	1,61	0,67	1,91	0,0047	0,0584	Slc26a10
Rbms1	4,88	4,08	1,74	0,0047	0,0584	Rbms1
Rapgef3	1,78	0,82	1,94	0,0047	0,0586	Rapgef3
Npr2	2,33	1,39	1,91	0,0047	0,0586	Npr2
Bend5	1,4	2,71	-2,49	0,0047	0,0587	Bend5
Pvt1	5,75	4,51	2,36	0,0047	0,0588	Pvt1
Prps2	5,1	5,77	-1,59	0,0048	0,0588	Prps2
2810025M15Rik	4,54	5,25	-1,64	0,0047	0,0588	2810025M15Rik
Arap2	3,03	3,82	-1,73	0,0047	0,0588	Arap2
Fbxl2	1,84	0,56	2,42	0,0048	0,0589	Fbxl2
Cd83	5,43	4,35	2,12	0,0048	0,0589	Cd83
Ly6h	2,27	1,52	1,67	0,0048	0,0589	Ly6h
Nrgn	2,51	1,84	1,59	0,0048	0,0589	Nrgn
Add3	6,38	7,31	-1,9	0,0048	0,0589	Add3
Gm12250	6,37	5,33	2,05	0,0048	0,0591	Gm12250
Oasl1	4,12	1,07	8,27	0,0048	0,0592	Oasl1
Nmi	4,13	4,75	-1,53	0,0048	0,0593	Nmi
Zfp37	1,86	3,06	-2,3	0,0048	0,0593	Zfp37
LOC108168196	1,33	0,2	2,2	0,0049	0,0594	LOC108168196
Irak1bp1	2,52	1,72	1,73	0,0049	0,0594	Irak1bp1
Plppr4	2,63	1,94	1,62	0,0049	0,0594	Plppr4
Hpgds	8,91	9,53	-1,54	0,0049	0,0594	Hpgds
Hk1	3,98	4,63	-1,56	0,0049	0,0594	Hk1
Oxct1	5,96	6,65	-1,62	0,0049	0,0594	Oxct1
Fhit	4,2	4,99	-1,73	0,0049	0,0594	Fhit
Tank	6,12	5,29	1,79	0,0050	0,0601	Tank
Picalm	6,86	8,07	-2,32	0,0050	0,0601	Picalm
Plpp1	6,08	7,13	-2,07	0,0050	0,0602	Plpp1
Gm14005	3,62	2,91	1,64	0,0050	0,0603	Gm14005
Fam135b	1,63	0,72	1,87	0,0050	0,0604	Fam135b
Fn1	1,35	0,55	1,75	0,0050	0,0604	Fn1
Ntrk2	3,89	2,64	2,37	0,0050	0,0607	Ntrk2
Stk39	2,47	1,06	2,66	0,0051	0,0608	Stk39
Rdh12	0,28	1,14	-1,82	0,0050	0,0608	Rdh12
Kcnd2	2,86	2,22	1,56	0,0052	0,0618	Kcnd2
Pnkd	2,94	2,11	1,78	0,0052	0,0619	Pnkd
Mapk12	0,11	0,77	-1,59	0,0052	0,0619	Mapk12
Flnb	4,51	5,27	-1,69	0,0052	0,0619	Flnb
Efcab6	0,28	1,16	-1,84	0,0052	0,0619	Efcab6
Syt6	2,93	1,96	1,96	0,0052	0,0620	Syt6
Kif27	2,3	0,77	2,89	0,0052	0,0622	Kif27
Gdap10	5,42	4,41	2,01	0,0053	0,0627	Gdap10
Ndst3	1,47	0,6	1,82	0,0053	0,0628	Ndst3
Mettl7a1	4,83	5,64	-1,75	0,0053	0,0629	Mettl7a1
Chl1	3,26	2,41	1,8	0,0053	0,0630	Chl1
Fras1	1,72	0,67	2,08	0,0053	0,0632	Fras1
Nfkbia	8,25	7,5	1,68	0,0053	0,0632	Nfkbia
H2-Q7	5,61	2,67	7,69	0,0054	0,0635	H2-Q7
St3gal6	8,16	8,86	-1,62	0,0054	0,0639	St3gal6
Diaph3	1,54	0,68	1,81	0,0054	0,0640	Diaph3
Adgre5	4,52	3,74	1,71	0,0054	0,0640	Adgre5
Hcst	4,82	4,2	1,54	0,0055	0,0642	Hcst
Celf3	3,84	2,15	3,24	0,0055	0,0643	Celf3
Sv2a	4,78	5,46	-1,6	0,0055	0,0643	Sv2a
Slc24a3	5,14	6,17	-2,04	0,0055	0,0643	Slc24a3
Adgrb2	3,79	2,85	1,91	0,0055	0,0648	Adgrb2
Arrdc2	5,17	4,58	1,51	0,0055	0,0649	Arrdc2
Gabbr2	4,73	3,07	3,15	0,0056	0,0651	Gabbr2
Pid1	4,86	4,19	1,6	0,0056	0,0651	Pid1
Gad1	2,25	1,42	1,78	0,0056	0,0653	Gad1
Zfp704	5,32	4,26	2,09	0,0057	0,0659	Zfp704
Sez6l2	4,72	4,12	1,51	0,0057	0,0659	Sez6l2
Nxpe3	3,63	4,25	-1,54	0,0057	0,0659	Nxpe3
Kirrel3	1,9	1,04	1,82	0,0057	0,0661	Kirrel3
Nyap2	2,86	1,73	2,2	0,0057	0,0662	Nyap2
Cd5l	2,13	1,05	2,12	0,0057	0,0662	Cd5l
Zfp810	5,19	4,19	2	0,0057	0,0662	Zfp810
Taf1b	5,91	5,21	1,63	0,0057	0,0662	Taf1b
Gm4951	0,8	0,11	1,61	0,0057	0,0662	Gm4951
Morn1	2,74	2,09	1,58	0,0057	0,0662	Morn1
Aph1c	3,65	2,12	2,9	0,0058	0,0667	Aph1c
Map3k5	5,46	4,75	1,63	0,0058	0,0667	Map3k5
Slc6a1	4,26	3,68	1,5	0,0058	0,0667	Slc6a1
Fkbp9	4,22	4,86	-1,55	0,0058	0,0667	Fkbp9
Lemd3	4,45	5,36	-1,89	0,0058	0,0667	Lemd3
Stradb	2,73	3,76	-2,03	0,0058	0,0667	Stradb
Eid2	2,21	3,54	-2,52	0,0058	0,0667	Eid2
Gm32633	1,1	0,44	1,58	0,0058	0,0668	Gm32633
Ctnnd2	2,96	4,07	-2,17	0,0058	0,0668	Ctnnd2
Zbp1	4,54	2,13	5,34	0,0059	0,0670	Zbp1
Disp2	3,18	2,07	2,16	0,0059	0,0670	Disp2
Wwtr1	2,27	1,41	1,81	0,0059	0,0670	Wwtr1
4931428F04Rik	2,04	1,21	1,78	0,0059	0,0670	4931428F04Rik
Rxfp1	0	0,68	-1,6	0,0059	0,0670	Rxfp1
Zfp358	5,58	6,35	-1,7	0,0059	0,0670	Zfp358
Epb41l3	5,49	4,87	1,53	0,0059	0,0671	Epb41l3
Gramd3	2,91	2,08	1,77	0,0059	0,0672	Gramd3
Retsat	4,91	4,3	1,52	0,0059	0,0672	Retsat
Cdk5rap3	4,31	4,98	-1,59	0,0059	0,0672	Cdk5rap3
Ddx26b	6,2	7	-1,74	0,0059	0,0672	Ddx26b
Slc25a45	7,79	8,39	-1,51	0,0060	0,0673	Slc25a45
Crlf2	7,07	6,16	1,88	0,0060	0,0678	Crlf2
Cep85l	5,07	5,77	-1,62	0,0060	0,0678	Cep85l
Snx10	5,6	6,25	-1,57	0,0060	0,0679	Snx10
Vash1	4,49	5,17	-1,61	0,0061	0,0681	Vash1
H2-Q6	8	4,98	8,11	0,0061	0,0682	H2-Q6
Lrp8	3,21	1,42	3,47	0,0061	0,0682	Lrp8
Tmem59l	3,14	2,48	1,59	0,0061	0,0682	Tmem59l
Klk8	5,25	6,13	-1,84	0,0061	0,0682	Klk8
Lhpp	4,12	3,37	1,69	0,0062	0,0687	Lhpp
Gdf15	1,38	0,69	1,61	0,0062	0,0689	Gdf15
Utp6	2,51	3,71	-2,28	0,0062	0,0689	Utp6
Gm35522	4,15	2,44	3,26	0,0062	0,0691	Gm35522
Lgals3bp	10,17	9,11	2,08	0,0062	0,0691	Lgals3bp
Naaa	5,06	5,7	-1,56	0,0062	0,0692	Naaa
Slc36a2	1	2,72	-3,31	0,0062	0,0693	Slc36a2
Rap1gap	1,33	0,73	1,51	0,0063	0,0694	Rap1gap
Emb	2,44	0,4	4,13	0,0063	0,0697	Emb
Ly9	4,97	3,37	3,03	0,0063	0,0698	Ly9
Olfr98	1,83	0,1	3,32	0,0064	0,0701	Olfr98
B4galnt4	3,78	2,17	3,05	0,0064	0,0701	B4galnt4
Lncpint	3,35	2,39	1,94	0,0063	0,0701	Lncpint
Dok2	1,98	0,77	2,33	0,0064	0,0702	Dok2
Slc22a15	1,04	0,22	1,77	0,0064	0,0705	Slc22a15
Bex2	2,72	2,05	1,59	0,0064	0,0705	Bex2
Hcfc2	4,11	4,73	-1,54	0,0064	0,0705	Hcfc2
Sh2d5	1,6	2,49	-1,85	0,0064	0,0705	Sh2d5
Cst7	3,96	1,97	4	0,0065	0,0706	Cst7
Mmp2	5,61	4,83	1,72	0,0065	0,0706	Mmp2
Pld1	8,05	8,66	-1,53	0,0065	0,0706	Pld1
Stk26	0,7	2,14	-2,72	0,0065	0,0707	Stk26
Fam49a	5,92	5,18	1,67	0,0065	0,0708	Fam49a
Akr1c13	2,18	1,03	2,21	0,0065	0,0709	Akr1c13
Ncapg2	2,29	1,43	1,81	0,0065	0,0709	Ncapg2
Grid2ip	1,14	0,54	1,52	0,0065	0,0709	Grid2ip
Gm11827	0,24	0,91	-1,59	0,0066	0,0715	Gm11827
Fkbp1b	2,1	1,4	1,62	0,0066	0,0716	Fkbp1b
Mab21l3	0,71	0	1,63	0,0066	0,0718	Mab21l3
Maml3	5,75	6,65	-1,87	0,0066	0,0718	Maml3
St3gal2	5,86	6,88	-2,03	0,0066	0,0718	St3gal2
Kcnn1	2,29	1,49	1,74	0,0067	0,0719	Kcnn1
1700003E16Rik	2,61	1,06	2,92	0,0067	0,0721	1700003E16Rik
Tlr11	2,03	1,12	1,87	0,0067	0,0721	Tlr11
Neo1	3,09	3,81	-1,64	0,0067	0,0721	Neo1
Tk1	3,47	1,63	3,58	0,0067	0,0722	Tk1
Slc35d2	3,82	3,23	1,5	0,0067	0,0722	Slc35d2
Acy1	4,75	5,48	-1,67	0,0067	0,0722	Acy1
C2	1,67	0,65	2,03	0,0068	0,0726	C2
Kcnh3	1,4	0,63	1,71	0,0068	0,0727	Kcnh3
Hacd2	5,98	5,34	1,56	0,0068	0,0728	Hacd2
9330159F19Rik	1,96	1,14	1,76	0,0068	0,0729	9330159F19Rik
Slc5a6	5,02	4,38	1,55	0,0068	0,0730	Slc5a6
6030443J06Rik	1,63	0,54	2,14	0,0069	0,0732	6030443J06Rik
Ypel4	0,94	0,1	1,79	0,0069	0,0733	Ypel4
S100a1	2,59	1,65	1,91	0,0069	0,0738	S100a1
Mapt	2,99	1,37	3,08	0,0069	0,0739	Mapt
Acod1	2,06	0,44	3,07	0,0070	0,0739	Acod1
Vangl1	1,33	3,02	-3,23	0,0070	0,0741	Vangl1
Cdkl4	1,24	1,9	-1,58	0,0070	0,0744	Cdkl4
Amotl1	3,59	4,28	-1,61	0,0070	0,0744	Amotl1
Cpne6	2,3	0,53	3,43	0,0071	0,0747	Cpne6
Anxa9	3,64	2,85	1,72	0,0071	0,0749	Anxa9
Iqcg	1,5	0,59	1,89	0,0071	0,0750	Iqcg
Rab13	1,46	0,79	1,59	0,0071	0,0750	Rab13
Shmt1	2,5	3,27	-1,71	0,0071	0,0750	Shmt1
Narf	5,28	6,23	-1,94	0,0071	0,0750	Narf
Wdr31	2	0,99	2,01	0,0072	0,0754	Wdr31
Mansc1	0,93	0,22	1,65	0,0072	0,0755	Mansc1
Slc4a8	2	1,13	1,82	0,0072	0,0757	Slc4a8
Cd24a	1,38	0,63	1,68	0,0072	0,0757	Cd24a
Spred2	6,13	5,49	1,55	0,0073	0,0759	Spred2
Stx16	7,8	7,18	1,53	0,0073	0,0759	Stx16
Tcaf1	1,56	2,56	-1,99	0,0073	0,0759	Tcaf1
Oasl2	7,27	5,07	4,6	0,0073	0,0761	Oasl2
Cdc14b	4,52	3,61	1,87	0,0073	0,0761	Cdc14b
Rims1	1,16	0,45	1,64	0,0073	0,0761	Rims1
Arhgap18	5,81	5,13	1,6	0,0073	0,0762	Arhgap18
Tuft1	3,26	2,52	1,67	0,0073	0,0764	Tuft1
Gm26947	3,09	2,13	1,94	0,0074	0,0765	Gm26947
A130077B15Rik	3,61	2,47	2,22	0,0075	0,0772	A130077B15Rik
Usp6nl	3,84	4,43	-1,5	0,0075	0,0772	Usp6nl
Rbm41	3,43	4,18	-1,68	0,0075	0,0772	Rbm41
Myl2	3,63	4,4	-1,71	0,0075	0,0774	Myl2
Pbx1	3,3	4,15	-1,79	0,0075	0,0774	Pbx1
Adcy8	1,06	2,28	-2,32	0,0075	0,0774	Adcy8
Cplx1	2,09	1,46	1,54	0,0076	0,0779	Cplx1
Nr1h3	1,9	1,07	1,78	0,0077	0,0781	Nr1h3
Angptl7	4,32	5,08	-1,7	0,0077	0,0781	Angptl7
Ccnjl	0,3	1,76	-2,76	0,0076	0,0781	Ccnjl
Ddx60	4,12	3,18	1,92	0,0077	0,0782	Ddx60
Slc16a9	0,5	2,31	-3,51	0,0077	0,0782	Slc16a9
Fam129a	6,76	5,89	1,83	0,0078	0,0789	Fam129a
A930017M01Rik	1,17	0,44	1,66	0,0078	0,0789	A930017M01Rik
Ypel2	4,37	4,99	-1,54	0,0078	0,0790	Ypel2
Cry1	1,4	2,3	-1,87	0,0078	0,0792	Cry1
Otub2	3,7	2,65	2,07	0,0079	0,0798	Otub2
LOC102632778	0,8	0,13	1,59	0,0079	0,0798	LOC102632778
Bhlhb9	2,42	3,36	-1,92	0,0079	0,0798	Bhlhb9
Ppp3cc	3,67	2,53	2,21	0,0079	0,0800	Ppp3cc
Nrxn2	3,7	2,96	1,66	0,0079	0,0800	Nrxn2
Plaur	5,77	5,05	1,65	0,0079	0,0800	Plaur
Lmtk2	2,76	1,78	1,98	0,0080	0,0801	Lmtk2
Sox4	6,52	7,42	-1,88	0,0080	0,0802	Sox4
Usp18	4,82	2,66	4,46	0,0080	0,0803	Usp18
Col20a1	2,24	1,13	2,15	0,0080	0,0803	Col20a1
Trp53cor1	2,91	3,57	-1,59	0,0080	0,0805	Trp53cor1
Gm36284	1,63	0,37	2,39	0,0081	0,0809	Gm36284
Irf2bpl	4,81	5,52	-1,63	0,0081	0,0809	Irf2bpl
9930021J03Rik	3,56	4,28	-1,65	0,0081	0,0810	9930021J03Rik
Atp9a	3,47	2,57	1,87	0,0082	0,0811	Atp9a
Rasal2	3,93	4,6	-1,59	0,0081	0,0811	Rasal2
Wdr54	1,98	0,78	2,29	0,0082	0,0814	Wdr54
Nr4a1	3,24	2,56	1,6	0,0082	0,0814	Nr4a1
Lpp	4,86	5,52	-1,57	0,0082	0,0815	Lpp
Rras2	3,96	4,81	-1,81	0,0082	0,0815	Rras2
Asap2	1,61	0,67	1,91	0,0082	0,0816	Asap2
Acbd4	1,01	0,33	1,6	0,0082	0,0816	Acbd4
Mb21d2	0,81	1,63	-1,78	0,0083	0,0817	Mb21d2
Ntng2	2,97	1,41	2,95	0,0083	0,0821	Ntng2
LOC108168394	1,43	0,55	1,84	0,0084	0,0825	LOC108168394
Gprasp2	0,23	1,85	-3,09	0,0084	0,0825	Gprasp2
AI429214	2,04	3,15	-2,15	0,0084	0,0826	AI429214
Clec4a3	3,58	4,98	-2,64	0,0084	0,0826	Clec4a3
Snap25	3,26	2,46	1,74	0,0085	0,0827	Snap25
Ryk	3,93	4,59	-1,58	0,0085	0,0827	Ryk
Gch1	3,31	2,67	1,56	0,0085	0,0828	Gch1
Daam1	5,03	4,42	1,52	0,0085	0,0828	Daam1
Smagp	6,04	5,43	1,53	0,0085	0,0829	Smagp
Agpat4	2,64	1,98	1,58	0,0085	0,0830	Agpat4
Oas3	4,97	1,07	14,91	0,0086	0,0832	Oas3
Rpa2	3,47	4,22	-1,69	0,0086	0,0832	Rpa2
Mmp9	2,39	0	5,24	0,0086	0,0833	Mmp9
1700113A16Rik	2,9	2,05	1,8	0,0086	0,0833	1700113A16Rik
Fam91a1	5,41	6,26	-1,81	0,0086	0,0833	Fam91a1
Cntnap1	4,16	2,78	2,6	0,0086	0,0835	Cntnap1
Rhof	3,03	1,99	2,05	0,0086	0,0835	Rhof
Plscr1	2,08	1,43	1,58	0,0086	0,0835	Plscr1
Ctnnal1	3,04	3,71	-1,59	0,0086	0,0835	Ctnnal1
Kcnma1	4,12	4,88	-1,69	0,0086	0,0835	Kcnma1
Cntn1	3,12	2,29	1,78	0,0086	0,0837	Cntn1
Echdc2	1,01	0,22	1,72	0,0087	0,0840	Echdc2
Ak6	1,34	2,11	-1,71	0,0087	0,0840	Ak6
Efr3b	2,77	1,61	2,23	0,0087	0,0842	Efr3b
Tomm7	5,01	4,42	1,51	0,0087	0,0842	Tomm7
Nr1d2	6,44	7,11	-1,58	0,0088	0,0844	Nr1d2
Mib2	8,27	8,99	-1,64	0,0088	0,0845	Mib2
Grm5	3,87	2,52	2,56	0,0088	0,0846	Grm5
Rap2b	3,08	1,85	2,34	0,0089	0,0849	Rap2b
Serpinb7	0,64	0	1,55	0,0089	0,0849	Serpinb7
Zfp697	2,99	4,13	-2,2	0,0089	0,0849	Zfp697
Pla2g16	4,52	3,73	1,72	0,0089	0,0851	Pla2g16
Nupr1	5,24	4,54	1,62	0,0089	0,0852	Nupr1
Zdhhc23	1,71	0,33	2,62	0,0090	0,0853	Zdhhc23
Atp8b4	0,91	0	1,88	0,0089	0,0853	Atp8b4
Rph3a	2,8	1,99	1,76	0,0090	0,0856	Rph3a
Map4k5	5,76	6,35	-1,5	0,0090	0,0856	Map4k5
Slamf8	7,13	6,2	1,91	0,0090	0,0859	Slamf8
Pdgfc	1,97	1,24	1,67	0,0090	0,0859	Pdgfc
Hapln2	1,96	0,95	2,02	0,0091	0,0860	Hapln2
Igsf8	4,16	3,54	1,54	0,0091	0,0863	Igsf8
Nfib	2,34	0,94	2,65	0,0092	0,0866	Nfib
Dgkg	2,58	1,11	2,77	0,0093	0,0873	Dgkg
Gm6277	4,99	5,63	-1,56	0,0093	0,0874	Gm6277
Olfr1034	0,11	0,93	-1,77	0,0093	0,0875	Olfr1034
Usp21	6,37	6,99	-1,53	0,0093	0,0876	Usp21
Atf5	2,26	1,36	1,86	0,0094	0,0883	Atf5
Gm36774	0,69	1,47	-1,72	0,0095	0,0886	Gm36774
Tmem171	0,75	0	1,68	0,0095	0,0888	Tmem171
Ppp2ca	8,62	9,24	-1,54	0,0095	0,0888	Ppp2ca
Eno3	2,95	4	-2,07	0,0095	0,0889	Eno3
Gpr84	8,24	7,46	1,71	0,0095	0,0890	Gpr84
LOC108169124	0,97	1,74	-1,71	0,0095	0,0892	LOC108169124
Plekho2	8,61	7,86	1,69	0,0096	0,0893	Plekho2
Gpld1	1,41	0,6	1,75	0,0096	0,0896	Gpld1
Gys1	4,85	4,21	1,55	0,0096	0,0896	Gys1
2010111I01Rik	4,58	3,7	1,84	0,0097	0,0899	2010111I01Rik
Arhgef40	6,38	7,11	-1,66	0,0097	0,0899	Arhgef40
Peg10	0,72	1,76	-2,05	0,0097	0,0899	Peg10
Abca1	10,13	9,47	1,58	0,0097	0,0900	Abca1
Spryd7	4,24	3,66	1,5	0,0097	0,0903	Spryd7
Myo10	3,11	1,47	3,11	0,0098	0,0908	Myo10
Tctn3	4,76	4,12	1,56	0,0098	0,0910	Tctn3
Phf11a	3,73	1,8	3,81	0,0099	0,0911	Phf11a
S100a10	1,13	2,14	-2,02	0,0099	0,0911	S100a10
Pik3c2b	4,48	5,15	-1,6	0,0100	0,0916	Pik3c2b
8030442B05Rik	5,62	6,31	-1,61	0,0099	0,0916	8030442B05Rik
Kcp	1,05	1,94	-1,86	0,0099	0,0916	Kcp
Zfp641	1,62	2,77	-2,22	0,0100	0,0916	Zfp641
Amer2	3,24	2,58	1,58	0,0101	0,0922	Amer2
Gm7694	3,51	4,39	-1,85	0,0101	0,0924	Gm7694
Gcat	3,03	1,82	2,31	0,0102	0,0928	Gcat
Ccdc120	1,53	0,56	1,97	0,0102	0,0928	Ccdc120
Sipa1l1	4,97	5,71	-1,68	0,0102	0,0928	Sipa1l1
Akap3	0,93	0	1,91	0,0103	0,0936	Akap3
Kcnc1	3,41	2,61	1,73	0,0103	0,0936	Kcnc1
Nfkbid	6,3	5,57	1,66	0,0103	0,0936	Nfkbid
Neurl1a	3,93	4,93	-2,01	0,0103	0,0936	Neurl1a
Oas1b	3,57	2,81	1,7	0,0104	0,0943	Oas1b
Arhgap31	5,93	6,64	-1,63	0,0105	0,0945	Arhgap31
Zfp652	6,35	7,14	-1,73	0,0105	0,0945	Zfp652
Kcna6	1,91	1,21	1,62	0,0105	0,0947	Kcna6
Ablim1	3,79	4,69	-1,87	0,0105	0,0950	Ablim1
Nrcam	2,97	1,82	2,22	0,0106	0,0951	Nrcam
Tmed1	3,79	3,14	1,57	0,0106	0,0951	Tmed1
Tmprss4	1,48	0,34	2,2	0,0106	0,0952	Tmprss4
LOC108167997	0,91	2,24	-2,52	0,0106	0,0952	LOC108167997
Atp2b3	3,52	2,93	1,5	0,0106	0,0955	Atp2b3
Pdk1	3,22	4,06	-1,79	0,0107	0,0957	Pdk1
Spock2	3,97	3,11	1,82	0,0108	0,0959	Spock2
Rilpl2	3,99	3,29	1,62	0,0108	0,0959	Rilpl2
Sort1	6,55	7,4	-1,81	0,0107	0,0959	Sort1
Lrrc1	1,29	2,39	-2,14	0,0108	0,0959	Lrrc1
Uck2	3,63	2,81	1,77	0,0108	0,0965	Uck2
Pygm	2,74	3,44	-1,63	0,0108	0,0965	Pygm
Spef2	1,58	0,64	1,93	0,0109	0,0966	Spef2
Arhgap19	3,11	2,34	1,7	0,0109	0,0968	Arhgap19
Ephb6	0,9	0,2	1,62	0,0109	0,0968	Ephb6
Lactb	4,59	5,47	-1,84	0,0109	0,0970	Lactb
Rnf213	6,05	4,83	2,33	0,0110	0,0972	Rnf213
Ccdc159	1,8	0,42	2,59	0,0110	0,0973	Ccdc159
Sla	8,33	8,96	-1,54	0,0110	0,0973	Sla
LOC108167440	3,44	2,31	2,18	0,0110	0,0976	LOC108167440
4833419F23Rik	1,27	0,68	1,5	0,0111	0,0978	4833419F23Rik
Dll1	1,62	2,85	-2,35	0,0113	0,0989	Dll1
Kcnq2	3,78	2,23	2,92	0,0114	0,0995	Kcnq2
Hspa4l	3,02	2,12	1,87	0,0114	0,0997	Hspa4l
Adcy1	4,75	3,81	1,92	0,0114	0,1001	Adcy1
Mgat5b	2,17	0,82	2,55	0,0115	0,1003	Mgat5b
B430306N03Rik	6,18	5,3	1,84	0,0115	0,1005	B430306N03Rik
Plekhg1	2,1	0,31	3,45	0,0116	0,1009	Plekhg1
Cd163	2,26	1,29	1,96	0,0117	0,1015	Cd163
Tctex1d4	1,25	0,57	1,61	0,0117	0,1015	Tctex1d4
Sh3rf1	2,13	1,47	1,58	0,0117	0,1017	Sh3rf1
Gm29927	1,06	2,43	-2,58	0,0117	0,1017	Gm29927
Tfap4	3,88	4,61	-1,66	0,0117	0,1018	Tfap4
Clstn3	4,19	3,07	2,16	0,0118	0,1020	Clstn3
Hist1h3d	5,16	3,82	2,55	0,0119	0,1026	Hist1h3d
Sh3bgrl3	8,31	7,59	1,65	0,0119	0,1026	Sh3bgrl3
Kif1c	5,93	5,27	1,57	0,0119	0,1026	Kif1c
LOC102637873	1,22	0,6	1,54	0,0120	0,1028	LOC102637873
Adgb	1,67	0,49	2,26	0,0120	0,1029	Adgb
Miat	4,48	2,49	3,96	0,0120	0,1030	Miat
Sptbn2	2,84	1,77	2,1	0,0120	0,1031	Sptbn2
Gm5122	0,93	0,1	1,78	0,0120	0,1031	Gm5122
Syp	4,07	3,25	1,76	0,0120	0,1031	Syp
Cbarp	5,09	4,28	1,75	0,0121	0,1031	Cbarp
Slamf6	3,98	3,29	1,61	0,0120	0,1031	Slamf6
Gm31633	0,63	0	1,54	0,0121	0,1032	Gm31633
Ubxn2b	3,06	3,77	-1,64	0,0121	0,1035	Ubxn2b
Abtb2	1,6	0,8	1,75	0,0121	0,1037	Abtb2
Ticrr	1,48	0,83	1,57	0,0123	0,1044	Ticrr
Sptbn4	1,69	0,6	2,12	0,0123	0,1046	Sptbn4
Epb41l1	2,47	1,81	1,58	0,0123	0,1046	Epb41l1
Xist	10,41	9,81	1,51	0,0124	0,1047	Xist
Mt3	3,46	2,59	1,83	0,0124	0,1049	Mt3
Gabrb3	1,86	1,09	1,71	0,0125	0,1052	Gabrb3
Sybu	1,2	0,45	1,68	0,0125	0,1052	Sybu
Ddit4	5,3	6,31	-2,02	0,0126	0,1060	Ddit4
D030028A08Rik	2,46	3,19	-1,65	0,0127	0,1064	D030028A08Rik
Rdh5	2,94	2,27	1,59	0,0127	0,1067	Rdh5
Adam22	3,62	2,87	1,68	0,0128	0,1070	Adam22
Tlcd1	1,11	0,45	1,58	0,0128	0,1070	Tlcd1
Tcp11l2	4,45	5,16	-1,64	0,0128	0,1070	Tcp11l2
Atp10a	2,43	1,47	1,96	0,0129	0,1071	Atp10a
Krt7	1,52	0,3	2,33	0,0129	0,1073	Krt7
Tnf	2,04	0,66	2,61	0,0130	0,1080	Tnf
Rims2	1,69	0,79	1,87	0,0130	0,1081	Rims2
Mex3a	1,04	1,64	-1,51	0,0131	0,1082	Mex3a
Negr1	1,73	0,94	1,72	0,0131	0,1084	Negr1
Gm30794	1,2	2,19	-1,98	0,0132	0,1089	Gm30794
Celsr3	2,2	1,02	2,26	0,0132	0,1091	Celsr3
Rad51b	1,47	0,7	1,7	0,0132	0,1091	Rad51b
Ctla2a	1,3	0,24	2,08	0,0133	0,1093	Ctla2a
Osbpl10	2,67	1,26	2,65	0,0133	0,1094	Osbpl10
Nfe2	1,18	0,25	1,9	0,0133	0,1094	Nfe2
Spred3	3,23	2,28	1,93	0,0134	0,1098	Spred3
Mdk	2,45	1,44	2,02	0,0134	0,1099	Mdk
Slfn3	3,28	2,1	2,26	0,0134	0,1100	Slfn3
Rasgrp2	1,58	0,44	2,19	0,0135	0,1103	Rasgrp2
Cyp51	3,71	3,06	1,56	0,0136	0,1107	Cyp51
Irf7	6,47	4,65	3,53	0,0137	0,1113	Irf7
Stard4	2,49	1,58	1,88	0,0137	0,1116	Stard4
Ppp1r26	1,58	2,66	-2,11	0,0138	0,1122	Ppp1r26
Ebf3	4,01	4,62	-1,53	0,0139	0,1124	Ebf3
Abl1	8,51	9,29	-1,72	0,0139	0,1124	Abl1
Grk6	7,57	6,93	1,56	0,0139	0,1125	Grk6
Il6st	8,87	9,54	-1,59	0,0139	0,1126	Il6st
Coro2b	2,21	1,09	2,17	0,0139	0,1128	Coro2b
Fcgr2b	2,17	1,43	1,67	0,0139	0,1128	Fcgr2b
Sppl3	6,98	7,72	-1,67	0,0139	0,1128	Sppl3
Pla2g2d	0,91	0,21	1,62	0,0140	0,1131	Pla2g2d
Apool	3,78	4,4	-1,54	0,0140	0,1131	Apool
Rep15	0,98	0,36	1,53	0,0141	0,1137	Rep15
Adtrp	1,65	2,35	-1,62	0,0142	0,1141	Adtrp
Pim1	5,18	3,82	2,57	0,0142	0,1142	Pim1
Ephb2	1,61	0,88	1,66	0,0143	0,1147	Ephb2
Fam213a	3,46	2,41	2,08	0,0144	0,1148	Fam213a
Mtcl1	2,41	1,64	1,7	0,0146	0,1160	Mtcl1
Gltp	6,26	5,67	1,51	0,0146	0,1162	Gltp
Rell1	3,5	2,73	1,7	0,0147	0,1167	Rell1
Fbxl21	2,93	2,02	1,88	0,0147	0,1168	Fbxl21
LOC108167568	1,82	0,79	2,04	0,0148	0,1169	LOC108167568
Pcsk2	3,15	2,32	1,77	0,0148	0,1169	Pcsk2
Net1	2,01	1,33	1,61	0,0147	0,1169	Net1
Mfsd6	2,56	1,12	2,72	0,0148	0,1171	Mfsd6
Dpf1	2,23	1,06	2,25	0,0149	0,1173	Dpf1
Astn2	2,6	1,57	2,04	0,0149	0,1173	Astn2
Kif7	1,19	0,6	1,5	0,0148	0,1173	Kif7
Atp6v1g2	3,33	2,48	1,79	0,0150	0,1178	Atp6v1g2
Scaf11	5,14	5,73	-1,5	0,0150	0,1180	Scaf11
Rsad2	2,87	0,97	3,72	0,0151	0,1181	Rsad2
Igsf6	5,94	5,01	1,92	0,0150	0,1181	Igsf6
Fam229b	1,74	1,09	1,56	0,0151	0,1183	Fam229b
Maff	3,06	1,08	3,94	0,0152	0,1187	Maff
Myo9b	8,61	7,96	1,57	0,0153	0,1192	Myo9b
Plxna2	1,97	0,97	2	0,0153	0,1195	Plxna2
Sobp	1,64	1,04	1,51	0,0155	0,1203	Sobp
Ppargc1b	3,21	2,15	2,09	0,0155	0,1204	Ppargc1b
Slc17a7	4,44	3,58	1,82	0,0155	0,1204	Slc17a7
Sema6a	1,2	0,37	1,77	0,0155	0,1204	Sema6a
Atg16l2	3,89	3,12	1,71	0,0155	0,1204	Atg16l2
Kcnc3	2,24	1,53	1,63	0,0155	0,1204	Kcnc3
F3	2,13	1	2,18	0,0157	0,1213	F3
Ptprt	2,8	1,46	2,52	0,0157	0,1215	Ptprt
Rassf7	1,93	1,06	1,83	0,0157	0,1215	Rassf7
Ceacam1	6,31	7,28	-1,95	0,0158	0,1218	Ceacam1
Cecr2	0,1	1,29	-2,28	0,0158	0,1218	Cecr2
Mbnl2	4,11	3,19	1,89	0,0158	0,1221	Mbnl2
Parp11	6,23	5,31	1,89	0,0159	0,1226	Parp11
Gbp3	5,93	5,3	1,55	0,0159	0,1228	Gbp3
Atp2b2	5,33	4,48	1,8	0,0160	0,1229	Atp2b2
Cdk18	2,28	1,25	2,04	0,0160	0,1232	Cdk18
Dpep2	2,33	1,56	1,71	0,0161	0,1238	Dpep2
Gm4943	1,67	2,39	-1,64	0,0162	0,1240	Gm4943
Agbl4	1,54	0,47	2,1	0,0162	0,1242	Agbl4
Tmem191c	1,66	1,05	1,52	0,0163	0,1248	Tmem191c
4930487H11Rik	3,09	3,95	-1,82	0,0163	0,1248	4930487H11Rik
Rtp4	7,33	6,18	2,22	0,0164	0,1254	Rtp4
Cenpe	2,02	0,87	2,23	0,0165	0,1262	Cenpe
Csmd2	1,18	0,55	1,55	0,0166	0,1263	Csmd2
Prune2	2,05	1,09	1,94	0,0167	0,1267	Prune2
Adamts20	0,96	0,11	1,8	0,0167	0,1267	Adamts20
Jph3	2,67	1,98	1,61	0,0167	0,1267	Jph3
Stx1b	1,93	1,3	1,54	0,0166	0,1267	Stx1b
Olfm2	1,92	1,03	1,86	0,0168	0,1273	Olfm2
Atp6v0d2	0,59	0	1,5	0,0168	0,1274	Atp6v0d2
Prrt1	3,51	2,66	1,8	0,0168	0,1276	Prrt1
Rec114	1,19	2,08	-1,86	0,0168	0,1276	Rec114
Kcna1	2,3	1,33	1,96	0,0171	0,1286	Kcna1
Dennd1a	6,14	5,38	1,69	0,0171	0,1286	Dennd1a
Ablim2	3,66	2,48	2,27	0,0171	0,1289	Ablim2
Eef1a2	2,96	2,19	1,71	0,0171	0,1289	Eef1a2
Nudt1	3,18	2,53	1,57	0,0171	0,1289	Nudt1
Nhsl2	0,45	1,61	-2,24	0,0171	0,1289	Nhsl2
Olfr99	3,82	2,91	1,88	0,0172	0,1290	Olfr99
Alms1	3,47	2,68	1,73	0,0172	0,1293	Alms1
Mbd4	1,19	0,53	1,58	0,0172	0,1293	Mbd4
Srcin1	3,02	2,15	1,83	0,0173	0,1295	Srcin1
H2-M3	6,33	5,3	2,05	0,0173	0,1297	H2-M3
Mcm9	5,25	4,64	1,53	0,0173	0,1298	Mcm9
Snx6	6,02	6,75	-1,65	0,0174	0,1299	Snx6
Arglu1	5,75	6,49	-1,67	0,0174	0,1304	Arglu1
Trp53inp2	4,5	3,78	1,65	0,0175	0,1305	Trp53inp2
Sv2b	2,23	1,4	1,78	0,0175	0,1309	Sv2b
Gm35113	1,5	0,45	2,08	0,0176	0,1310	Gm35113
Kalrn	4,51	2	5,7	0,0176	0,1314	Kalrn
Ptrh1	1,37	0,44	1,91	0,0177	0,1316	Ptrh1
Gm684	0,43	1,23	-1,74	0,0177	0,1317	Gm684
Sgsm1	1,71	0,81	1,87	0,0177	0,1318	Sgsm1
Grm4	3,11	1,85	2,39	0,0178	0,1319	Grm4
Ier5l	1,37	0,73	1,56	0,0177	0,1319	Ier5l
Fstl5	1,13	0,54	1,51	0,0178	0,1319	Fstl5
Gata2	0,1	0,7	-1,52	0,0178	0,1319	Gata2
Ppm1e	0,86	2,34	-2,8	0,0178	0,1319	Ppm1e
Pcdh11x	0,85	0,17	1,6	0,0179	0,1325	Pcdh11x
Rragb	0,92	0,3	1,55	0,0179	0,1326	Rragb
D7Ertd443e	0,83	2,05	-2,34	0,0180	0,1331	D7Ertd443e
Ppp1r13l	2,74	3,44	-1,63	0,0181	0,1335	Ppp1r13l
Fam133b	3,67	4,5	-1,77	0,0182	0,1335	Fam133b
Abcg3	1,32	2,02	-1,63	0,0182	0,1336	Abcg3
Dmrtb1	1,49	2,54	-2,06	0,0183	0,1344	Dmrtb1
Fstl4	1,58	0,78	1,75	0,0184	0,1349	Fstl4
Slc7a1	5,58	4,73	1,81	0,0185	0,1350	Slc7a1
Magi1	5,42	6,25	-1,78	0,0185	0,1353	Magi1
Actr3b	1,98	0,82	2,24	0,0186	0,1356	Actr3b
Nphp4	1,57	0,57	2	0,0186	0,1356	Nphp4
Samd12	2,51	1,26	2,39	0,0187	0,1357	Samd12
Mx1	5,03	3,26	3,42	0,0188	0,1363	Mx1
P4htm	2,94	2,04	1,87	0,0188	0,1363	P4htm
Tmem220	2,8	1,98	1,76	0,0188	0,1364	Tmem220
Cmpk2	4,79	2,79	3,98	0,0190	0,1378	Cmpk2
Mpped1	1,62	0,93	1,61	0,0193	0,1396	Mpped1
Ifitm6	1,92	0	3,77	0,0194	0,1397	Ifitm6
Ndrg2	2,71	1,99	1,64	0,0195	0,1401	Ndrg2
Baiap2	4,62	3,92	1,63	0,0196	0,1401	Baiap2
Zfp36l3	0,82	1,44	-1,54	0,0196	0,1402	Zfp36l3
Bzrap1	3,6	2	3,03	0,0196	0,1403	Bzrap1
Arpp21	4,06	2,46	3,03	0,0196	0,1403	Arpp21
Csrnp2	3,91	4,53	-1,54	0,0197	0,1404	Csrnp2
Fkbp14	3,21	4,04	-1,78	0,0198	0,1408	Fkbp14
AA467197	0,89	0	1,85	0,0199	0,1411	AA467197
Cacng8	2,53	1,74	1,73	0,0199	0,1411	Cacng8
Cacnb1	1,91	1,3	1,52	0,0199	0,1411	Cacnb1
Gm32026	2,63	1,79	1,8	0,0199	0,1413	Gm32026
Chrm3	3,12	1,67	2,74	0,0200	0,1417	Chrm3
Grm8	1,46	0,71	1,69	0,0201	0,1420	Grm8
Ubac1	4,41	5,04	-1,54	0,0201	0,1420	Ubac1
Dact3	1,72	4,06	-5,06	0,0201	0,1420	Dact3
Gpsm2	0,78	0,2	1,5	0,0201	0,1421	Gpsm2
Kctd12b	2,66	3,84	-2,26	0,0202	0,1421	Kctd12b
Pfkfb1	2,46	1,62	1,79	0,0202	0,1425	Pfkfb1
C330027C09Rik	2,02	1,39	1,54	0,0202	0,1426	C330027C09Rik
Egfl7	1,39	0,75	1,55	0,0203	0,1429	Egfl7
Cd101	3,23	4,15	-1,9	0,0203	0,1429	Cd101
Klrd1	0,21	0,98	-1,71	0,0204	0,1430	Klrd1
Arhgef25	1,52	2,77	-2,37	0,0203	0,1430	Arhgef25
Kifc1	3,69	2,88	1,76	0,0205	0,1435	Kifc1
Gm20172	1,18	0,58	1,52	0,0207	0,1446	Gm20172
Mtss1l	2,63	2,02	1,52	0,0208	0,1450	Mtss1l
Hid1	1,61	0,79	1,77	0,0209	0,1452	Hid1
Epha2	7,26	6,63	1,55	0,0209	0,1453	Epha2
Gm29907	1,33	0,6	1,66	0,0209	0,1454	Gm29907
Brsk2	1,26	0,2	2,09	0,0210	0,1455	Brsk2
Gm6402	2,14	2,77	-1,55	0,0210	0,1455	Gm6402
Pyhin1	5,14	3,54	3,05	0,0212	0,1470	Pyhin1
Chsy1	7,98	8,59	-1,53	0,0212	0,1470	Chsy1
Fjx1	1,22	0,45	1,71	0,0213	0,1476	Fjx1
Grrp1	0,15	1,14	-1,98	0,0214	0,1477	Grrp1
Erc1	3,32	2,49	1,77	0,0214	0,1479	Erc1
Tmem128	4,96	5,69	-1,66	0,0214	0,1479	Tmem128
1110001J03Rik	3,62	3,02	1,51	0,0215	0,1486	1110001J03Rik
Asap3	7,31	8,12	-1,76	0,0216	0,1487	Asap3
Sigirr	1,82	0,56	2,39	0,0217	0,1492	Sigirr
Hlx	2,81	1,91	1,86	0,0217	0,1492	Hlx
Snhg11	6,88	4,81	4,19	0,0218	0,1496	Snhg11
Slc7a4	2,34	1,58	1,69	0,0221	0,1513	Slc7a4
Tmem178b	3,25	1,89	2,56	0,0221	0,1515	Tmem178b
Ace	1,03	0,18	1,79	0,0221	0,1515	Ace
Dbn1	2,79	1,76	2,05	0,0223	0,1521	Dbn1
Arfgef2	5,21	4,52	1,62	0,0225	0,1531	Arfgef2
LOC105245439	4,01	4,63	-1,54	0,0225	0,1533	LOC105245439
Efna5	0,82	1,48	-1,58	0,0226	0,1534	Efna5
Col6a1	2,63	1,61	2,03	0,0227	0,1540	Col6a1
Meg3	8,18	6,34	3,58	0,0228	0,1546	Meg3
Slit3	1,91	1,19	1,64	0,0228	0,1546	Slit3
Tmem154	2,11	1,22	1,86	0,0229	0,1547	Tmem154
Epha10	1,66	0,91	1,68	0,0229	0,1548	Epha10
Syt14	1,39	0,67	1,65	0,0229	0,1548	Syt14
B130006D01Rik	3,89	4,54	-1,57	0,0229	0,1548	B130006D01Rik
Grik2	3,31	2,3	2,01	0,0230	0,1550	Grik2
AA414768	2,66	1,85	1,76	0,0230	0,1551	AA414768
Clec4a4	0,87	1,74	-1,83	0,0230	0,1552	Clec4a4
Sdccag3	6,33	7,04	-1,63	0,0232	0,1561	Sdccag3
Exoc3l4	2,42	1,39	2,05	0,0233	0,1565	Exoc3l4
Mmp12	1,44	0,71	1,66	0,0233	0,1565	Mmp12
Inpp4a	6,11	5,49	1,54	0,0234	0,1570	Inpp4a
Prkg1	0,46	1,33	-1,82	0,0234	0,1570	Prkg1
Grin2a	4,06	2,77	2,46	0,0234	0,1573	Grin2a
Enkd1	3,09	2,47	1,54	0,0234	0,1573	Enkd1
Pard6g	1,2	0,11	2,13	0,0235	0,1578	Pard6g
Syt1	3,56	2,52	2,05	0,0236	0,1578	Syt1
Cspg4	1,38	0,78	1,52	0,0236	0,1580	Cspg4
Ngef	2,55	1,19	2,57	0,0237	0,1584	Ngef
1700007L15Rik	2,05	1,46	1,51	0,0237	0,1586	1700007L15Rik
Cc2d2a	0,99	1,72	-1,66	0,0237	0,1586	Cc2d2a
Ptgfrn	3,52	4,48	-1,95	0,0237	0,1587	Ptgfrn
Cask	3,07	2,48	1,5	0,0238	0,1588	Cask
Pmm1	1,62	0,98	1,56	0,0238	0,1589	Pmm1
Lmtk3	4,22	3,05	2,25	0,0239	0,1594	Lmtk3
Egr2	0,96	0,37	1,51	0,0239	0,1594	Egr2
Cckbr	1,88	0,88	1,99	0,0240	0,1598	Cckbr
Ccrl2	5,56	4,68	1,83	0,0242	0,1603	Ccrl2
Fam167b	3,47	4,15	-1,61	0,0242	0,1606	Fam167b
Alk	1,27	0,34	1,9	0,0243	0,1608	Alk
Pilrb2	0,6	0	1,52	0,0243	0,1609	Pilrb2
Mgl2	1,04	0,14	1,87	0,0243	0,1610	Mgl2
Pgbd5	2,42	1,14	2,44	0,0243	0,1611	Pgbd5
Lingo2	1,33	0,16	2,25	0,0244	0,1613	Lingo2
Nr2f1	1,48	0,48	2	0,0244	0,1613	Nr2f1
St8sia1	4,44	3,18	2,41	0,0245	0,1616	St8sia1
Kcnt1	3,09	1,42	3,18	0,0246	0,1622	Kcnt1
Gm12216	4,71	3,86	1,81	0,0246	0,1622	Gm12216
Nmnat2	1,34	0,6	1,67	0,0246	0,1622	Nmnat2
Inf2	4,39	3,26	2,19	0,0249	0,1633	Inf2
Shank3	2,01	1,1	1,88	0,0248	0,1633	Shank3
Dcstamp	0,69	0	1,61	0,0249	0,1633	Dcstamp
A830052D11Rik	0,78	1,4	-1,54	0,0248	0,1633	A830052D11Rik
Anpep	0,92	0,31	1,53	0,0250	0,1641	Anpep
Anxa1	1,85	0,2	3,13	0,0251	0,1642	Anxa1
Cadm2	2,93	1,78	2,22	0,0251	0,1642	Cadm2
Ovol2	0,66	0	1,58	0,0252	0,1644	Ovol2
4933411K16Rik	2,21	2,84	-1,55	0,0252	0,1644	4933411K16Rik
Cabyr	2,04	0,99	2,08	0,0253	0,1650	Cabyr
Mpdz	0,9	0,1	1,73	0,0254	0,1653	Mpdz
Bsn	3,84	4,63	-1,73	0,0254	0,1653	Bsn
Mdp1	4,15	4,75	-1,52	0,0254	0,1655	Mdp1
Tpgs1	4,26	4,95	-1,62	0,0255	0,1656	Tpgs1
Gm1070	2,55	1,65	1,86	0,0255	0,1657	Gm1070
Cntn2	3,18	2,5	1,61	0,0255	0,1657	Cntn2
Dnm1	5,38	3,95	2,69	0,0255	0,1658	Dnm1
Mybl1	2,61	1,75	1,81	0,0256	0,1658	Mybl1
Chchd10	2,77	2,01	1,7	0,0255	0,1658	Chchd10
Gm36529	0,82	1,78	-1,95	0,0256	0,1658	Gm36529
Gm15743	1,36	0,42	1,92	0,0257	0,1664	Gm15743
Kcnb1	2,69	1,72	1,96	0,0259	0,1672	Kcnb1
Aifm3	3,28	1,49	3,46	0,0260	0,1675	Aifm3
Aldoc	5,04	4,34	1,63	0,0261	0,1680	Aldoc
Gria1	3,7	2,31	2,62	0,0261	0,1682	Gria1
Slit2	1,08	0,12	1,95	0,0261	0,1683	Slit2
Tgfb3	1,37	0,54	1,79	0,0262	0,1683	Tgfb3
Senp6	3,5	4,13	-1,55	0,0262	0,1685	Senp6
Pcbp4	3,24	2,48	1,69	0,0263	0,1688	Pcbp4
Slc45a1	2,07	1,26	1,76	0,0264	0,1690	Slc45a1
Ltk	0,59	0	1,5	0,0264	0,1690	Ltk
Mpv17l	2,75	3,78	-2,04	0,0264	0,1690	Mpv17l
Cntnap5a	2,03	0,76	2,4	0,0264	0,1692	Cntnap5a
Treml4	1,86	1,05	1,74	0,0267	0,1707	Treml4
Shank1	2,48	1,86	1,53	0,0267	0,1707	Shank1
Arcn1	6,34	7,01	-1,59	0,0268	0,1711	Arcn1
Nfasc	3,78	2,59	2,28	0,0269	0,1714	Nfasc
Hpse	1,56	0,83	1,66	0,0270	0,1719	Hpse
Pde1b	7,07	7,74	-1,59	0,0272	0,1723	Pde1b
Dlgap2	2,8	1,3	2,82	0,0273	0,1729	Dlgap2
Smad3	7,21	7,84	-1,55	0,0273	0,1729	Smad3
Nrsn1	2,14	1,39	1,68	0,0275	0,1738	Nrsn1
Ccdc62	2,03	3,07	-2,06	0,0275	0,1738	Ccdc62
Il3ra	2,92	2,16	1,7	0,0276	0,1741	Il3ra
Emp1	0,77	0	1,71	0,0276	0,1745	Emp1
Btbd17	1	1,74	-1,67	0,0277	0,1747	Btbd17
Gna14	2,74	2,02	1,65	0,0279	0,1758	Gna14
Med21	2,01	2,72	-1,64	0,0281	0,1766	Med21
Slc1a4	4,96	4,34	1,54	0,0282	0,1769	Slc1a4
Nyap1	2,9	2,15	1,68	0,0282	0,1770	Nyap1
Edil3	2,13	1,27	1,82	0,0284	0,1776	Edil3
Arhgap33	2,85	2,1	1,68	0,0284	0,1776	Arhgap33
Gabra5	0,84	0,21	1,54	0,0283	0,1776	Gabra5
Tmeff1	1,77	0,7	2,09	0,0284	0,1777	Tmeff1
Eid1	1,76	1,17	1,51	0,0285	0,1780	Eid1
Mical2	3,41	2,67	1,67	0,0285	0,1782	Mical2
P2rx1	3,91	4,59	-1,6	0,0287	0,1790	P2rx1
Adk	3,63	2,89	1,67	0,0288	0,1793	Adk
Gm572	0,98	1,86	-1,85	0,0288	0,1793	Gm572
Spin4	0,32	1,38	-2,08	0,0290	0,1800	Spin4
Pafah1b1	3,36	4,18	-1,77	0,0292	0,1809	Pafah1b1
Ppargc1a	1,35	0,11	2,36	0,0292	0,1811	Ppargc1a
Ccdc88c	1,67	0,98	1,62	0,0292	0,1811	Ccdc88c
Naalad2	3,78	4,59	-1,76	0,0293	0,1815	Naalad2
Ikbke	2,67	1,07	3,02	0,0294	0,1818	Ikbke
LOC108167732	5,07	6,13	-2,07	0,0296	0,1825	LOC108167732
4933424M12Rik	2,62	1,97	1,57	0,0297	0,1828	4933424M12Rik
Adgrb3	3,57	2,08	2,81	0,0297	0,1830	Adgrb3
Itpka	1,4	0,73	1,59	0,0297	0,1831	Itpka
Bard1	1,78	2,44	-1,57	0,0298	0,1834	Bard1
Vapa	6,22	6,81	-1,51	0,0299	0,1838	Vapa
Dok4	1,9	1,07	1,77	0,0300	0,1839	Dok4
Slco3a1	2,22	1,57	1,57	0,0300	0,1839	Slco3a1
5830416I19Rik	0,65	0	1,57	0,0300	0,1840	5830416I19Rik
Tenm4	2,68	1,44	2,36	0,0303	0,1849	Tenm4
Ncam1	4,05	3,11	1,91	0,0304	0,1852	Ncam1
Ptprn	4,07	3,17	1,86	0,0304	0,1852	Ptprn
Enah	2,51	1,71	1,74	0,0304	0,1853	Enah
Sh3rf3	1,61	0,37	2,36	0,0305	0,1855	Sh3rf3
Mef2d	3,43	4,03	-1,51	0,0305	0,1856	Mef2d
Gad2	0,81	0,2	1,53	0,0306	0,1857	Gad2
Glrp1	1,91	2,7	-1,73	0,0306	0,1857	Glrp1
Cuedc1	1,25	0,64	1,53	0,0307	0,1861	Cuedc1
Vegfa	3,14	2,13	2,02	0,0307	0,1862	Vegfa
Kcnk2	0,78	0,11	1,59	0,0307	0,1863	Kcnk2
Akap6	3,06	2,04	2,04	0,0310	0,1876	Akap6
Kbtbd6	2,37	1,48	1,86	0,0311	0,1878	Kbtbd6
Btbd3	3,83	4,47	-1,56	0,0311	0,1878	Btbd3
Slc38a9	3,11	4,17	-2,08	0,0311	0,1878	Slc38a9
Gnao1	4	3,2	1,74	0,0313	0,1884	Gnao1
Atpif1	1,15	0,5	1,57	0,0316	0,1896	Atpif1
Tppp3	1,21	0,55	1,58	0,0316	0,1898	Tppp3
Ankrd28	4,08	3,24	1,79	0,0317	0,1900	Ankrd28
Ipw	2,14	1,27	1,83	0,0317	0,1903	Ipw
Slfn5	5,03	3,46	2,97	0,0318	0,1904	Slfn5
Lrfn5	2,25	1,21	2,06	0,0318	0,1905	Lrfn5
Atp2b4	2,72	1,86	1,82	0,0319	0,1907	Atp2b4
Tmem35	1,06	0,4	1,58	0,0321	0,1919	Tmem35
Tmem107	2,18	1,38	1,74	0,0323	0,1924	Tmem107
Tmem246	1,28	0,37	1,88	0,0323	0,1925	Tmem246
Thnsl2	1,67	2,59	-1,89	0,0325	0,1934	Thnsl2
Hhat	2,5	3,22	-1,65	0,0327	0,1940	Hhat
Gm30908	1,02	0,32	1,62	0,0328	0,1943	Gm30908
Gm20594	0,9	0,3	1,52	0,0328	0,1943	Gm20594
[truncated: 16 more rows]
