# Supplementary material for: Profilin 1 Controls a Microglial Cytoskeleton Checkpoint to Prevent Senescence and Premature Synaptic Decline
Source: Research Square preprint supplement (doi:10.21203/rs.3.rs-6666431/v1), 2025-08-27
Supplement: Supplementary file 2 [file 4bffe578375512c94b39ddb8.xlsx]

## Sheet: Folha1
Accession	Description	Sum PEP Score	Gene Symbol	Modifications	Position	Abundance Ratio	Abundance Ratio Adj. P-Value	Found in PhosphositePlus	Observations
Q9CPS8	Small membrane A-kinase anchor protein OS=Mus musculus OX=10090 PE=1 SV=1	84.525		1xDeamidated [Q]; 3xPhospho [S4(100); S20(99); S/T/Y]	S24; S40; S/T/Y [21-51]	100	2.10407e-16	HTP (both)
Q8BYZ1	ABI gene family member 3 OS=Mus musculus OX=10090 GN=Abi3 PE=1 SV=3	14.94	Abi3	2×Carbamidomethyl [C7; C27]; 1×Phospho	S343	0.283	0.00382288	HTP/LTP
Q8K4G5	Actin-binding LIM protein 1 OS=Mus musculus OX=10090 GN=Ablim1 PE=1 SV=1	62.715	Ablim1	2×Phospho	S466; S470	2.637	0.01135	HTP (both)
Q8BL65	Actin-binding LIM protein 2 OS=Mus musculus OX=10090 GN=Ablim2 PE=1 SV=1	162.135	Ablim2	1×Phospho	S294	2.189	0.00262013	HTP
Q5SSL4	Active breakpoint cluster region-related protein OS=Mus musculus OX=10090 GN=Abr PE=1 SV=1	96.72	Abr	1×Deamidated [Q21]; 2×Oxidation [M9; M18]; 1×Phospho	S53	2.092	0.00741694	HTP
P60710	Actin, cytoplasmic 1 OS=Mus musculus OX=10090 GN=Actb PE=1 SV=1	377.002	Actb	1×Deamidated [N14]; 1×Phospho	S239	0.214	0.0010796	HTP	Same phosphopeptide aligned with these protein accessions
Q8BFZ3	Beta-actin-like protein 2 OS=Mus musculus OX=10090 GN=Actbl2 PE=1 SV=1	78	Actbl2	1×Deamidated [N14]; 1×Phospho	S240	0.214	0.0010796	HTP
P63260	Actin, cytoplasmic 2 OS=Mus musculus OX=10090 GN=Actg1 PE=1 SV=1	391.662	Actg1	1×Deamidated [N14]; 1×Phospho	S239	0.214	0.0010796	HTP
P63268	Actin, gamma-enteric smooth muscle OS=Mus musculus OX=10090 GN=Actg2 PE=1 SV=1	118.563	Actg2	1×Deamidated [N14]; 1×Phospho	S240	0.214	0.0010796	HTP
Q9R1V6	Disintegrin and metalloproteinase domain-containing protein 22 OS=Mus musculus OX=10090 GN=Adam22 PE=1 SV=2	169.282	Adam22	1×Phospho	S868	0.378	3.47275e-05	HTP
Q9QYC0	Alpha-adducin OS=Mus musculus OX=10090 GN=Add1 PE=1 SV=2	430.485	Add1	3×Phospho [S3(99.1); T13(100); S/T]	S600; T610; S/T [598-629]	100	2.10407e-16	HTP (for S600) and HTP/LTP (T610)
				2×Deamidated [Q17; N18]; 1×Phospho [S/T]	[445-467]	0.342	0.000476946	-
				1×Deamidated [N12]; 2×Phospho [T13(98.8); S/T]	T610; S/T [598-629]	0.293	0.00593774	HTP/LTP
				1×Deamidated [N10]; 1×Phospho	T610	2.942	0.0168739	HTP/LTP
Q9QYB5	Gamma-adducin OS=Mus musculus OX=10090 GN=Add3 PE=1 SV=2	217.544	Add3	1×Phospho [T/S]	[449-463]	100	2.10407e-16	-
Q3UHD1	Adhesion G protein-coupled receptor B1 OS=Mus musculus OX=10090 GN=Adgrb1 PE=1 SV=1	29.571	Adgrb1	1×Phospho [S/T]	[1457-1470]	1.877	0.0150862	-
Q80ZF8	Adhesion G protein-coupled receptor B3 OS=Mus musculus OX=10090 GN=Adgrb3 PE=1 SV=2	51.985	Adgrb3	1×Oxidation [M9]; 1×Phospho	S1411	1.824	0.0492293	HTP
Q9QZQ1	Afadin OS=Mus musculus OX=10090 GN=Afdn PE=1 SV=3	106.924	Afdn	1×Oxidation [M9]; 1×Phospho	S216	100	2.10407e-16	HTP
Q80WT5	Aftiphilin OS=Mus musculus OX=10090 GN=Aftph PE=1 SV=2	25.012	Aftph	1×Phospho [S/T]	[673-683]	0.509	0.0371094	-
Q8K3E5	Jouberin OS=Mus musculus OX=10090 GN=Ahi1 PE=1 SV=2	13.269	Ahi1	1×Deamidated [N10]; 1×Phospho	S181	2.587	0.0189147	HTP
Q64362	AKT-interacting protein OS=Mus musculus OX=10090 GN=Aktip PE=1 SV=1	8.851	Aktip	1×Phospho [T/S]	[22-37]	100	2.10407e-16	-
Q8CCJ4	APC membrane recruitment protein 2 OS=Mus musculus OX=10090 GN=Amer2 PE=1 SV=2	18.58	Amer2	2×Carbamidomethyl [C9; C30]; 1×Phospho [S/Y/T]	[552-584]	100	2.10407e-16	-
Q7TQF7	Amphiphysin OS=Mus musculus OX=10090 GN=Amph PE=1 SV=1	174.693	Amph	1×Phospho [T/S]	[260-292]	0.101	2.10407e-16	-
				1×Deamidated [N19]; 1×Phospho [T/S]	[260-292]	0.139	2.10407e-16	-
				1×Deamidated [N19]; 2×Phospho [S17(100); T/S]	S276; T/S [260-292]	0.43	8.85535e-07	HTP/LTP
				3×Phospho [S13(100); T/S]	S272; T/S [260-292]	0.303	0.00250332	HTP/LTP
Q91W96	Anaphase-promoting complex subunit 4 OS=Mus musculus OX=10090 GN=Anapc4 PE=1 SV=1	10.918	Anapc4	1×Deamidated [Q15]; 2×Phospho [S/T]	[771-797]	7.535	8.26775e-07	-
Q8C8R3	Ankyrin-2 OS=Mus musculus OX=10090 GN=Ank2 PE=1 SV=2	1539.84	Ank2	1×Deamidated [N12]; 1×Phospho	S2395	100	2.10407e-16	HTP
				2×Deamidated [N27; N/Q]; 1×Oxidation [M3]; 1×Phospho	S2883	0.01	2.10407e-16	Not found in PhosphositePlus
				1×Deamidated [N2]; 1×Phospho	S846	0.01	2.10407e-16	HTP
				1×Phospho	S3343	0.138	2.10407e-16	HTP
				1×Phospho [S]	[2148-2169]	0.113	3.96044e-10	-
				2×Phospho	S31; S34	0.4	1.89722e-07	HTP (both)
				1×Phospho [S/T]	[2618-2635]	4.459	0.000530937	-
				1×Oxidation [M7]; 1×Phospho	S846	2.023	0.00155601	HTP
				1×Phospho	S846	1.998	0.00205427	HTP
				3×Phospho	S1699; S1700; S1703	2.169	0.00216187	HTP (all)
				1×Phospho [S]	[3763-3783]	2.331	0.0092444	-
				1×Oxidation [M7]; 2×Phospho [T/S/Y]	[833-868]	2.633	0.010496	-
				1×Deamidated [N5]; 1×Oxidation [M22]; 1×Phospho	S1467	0.33	0.0170831	HTP
Q8BIZ1	Ankyrin repeat and sterile alpha motif domain-containing protein 1B OS=Mus musculus OX=10090 GN=Anks1b PE=1 SV=3	76.379	Anks1b	1×Carbamidomethyl [C10]; 2×Phospho	S507; S510	0.499	0.0168739	HTP (both)
Q8K298	Anillin OS=Mus musculus OX=10090 GN=Anln PE=1 SV=2	9.499	Anln	2×Phospho	S653; S656	3.013	0.000393302	HTP (both)
P17426	AP-2 complex subunit alpha-1 OS=Mus musculus OX=10090 GN=Ap2a1 PE=1 SV=1	139.101	Ap2a1	1×Deamidated [N]; 3×Phospho	S652; T653; S655	2.77	0.000377894	HTP (all)
				1×Deamidated [N]; 3×Phospho	S652; T653; S655	2.319	0.0171238	HTP (all)
B2RUJ5	Amyloid-beta A4 precursor protein-binding family A member 1 OS=Mus musculus OX=10090 GN=Apba1 PE=1 SV=2	205.576	Apba1	1×Phospho	S84	2.239	0.0179713	HTP
Q8K3H0	DCC-interacting protein 13-alpha OS=Mus musculus OX=10090 GN=Appl1 PE=1 SV=1	19.92	Appl1	1×Carbamidomethyl [C38]; 1×Deamidated [Q41]; 2×Phospho [T/S]	[424-469]	100	2.10407e-16	-
Q6IFT4	Rho GTPase-activating protein 20 OS=Mus musculus OX=10090 GN=Arhgap20 PE=1 SV=1	11.362	Arhgap20	1×Oxidation [M7]; 1×Phospho	S20	3.931	0.0103461	HTP
Q69ZH9	Rho GTPase-activating protein 23 OS=Mus musculus OX=10090 GN=Arhgap23 PE=1 SV=2	77.418	Arhgap23	2×Phospho	T652; S655	100	2.10407e-16	HTP (both)
Q91YM2	Rho GTPase-activating protein 35 OS=Mus musculus OX=10090 GN=Arhgap35 PE=1 SV=3	82.78	Arhgap35	1×Phospho	S1179	0.18	0.000189682	HTP
Q5SSM3	Rho GTPase-activating protein 44 OS=Mus musculus OX=10090 GN=Arhgap44 PE=1 SV=1	17.267	Arhgap44	1×Phospho	S805	0.45	0.0102909	HTP
Q9ES28	Rho guanine nucleotide exchange factor 7 OS=Mus musculus OX=10090 GN=Arhgef7 PE=1 SV=2	72.018	Arhgef7	1×Oxidation [M1]; 1×Phospho	S497	1.887	0.0108103	HTP/LTP
Q9D7A8	Armadillo repeat-containing protein 1 OS=Mus musculus OX=10090 GN=Armc1 PE=1 SV=1	104.425	Armc1	1×Deamidated [N/Q]; 1×Oxidation [M7]; 1×Phospho	S246	0.168	2.10407e-16	HTP
				1×Oxidation [M7]; 1×Phospho	S246	3.061	6.30183e-09	HTP
Q9DCB4	cAMP-regulated phosphoprotein 21 OS=Mus musculus OX=10090 GN=Arpp21 PE=1 SV=2	54.342	Arpp21	1×Phospho	S32	0.301	0.00905434	HTP
Q9QWY8	Arf-GAP with SH3 domain, ANK repeat and PH domain-containing protein 1 OS=Mus musculus OX=10090 GN=Asap1 PE=1 SV=2	97.808	Asap1	1×Phospho [S/T]	[1057-1079]	0.391	0.0460509	-
Q7SIG6	Arf-GAP with SH3 domain, ANK repeat and PH domain-containing protein 2 OS=Mus musculus OX=10090 GN=Asap2 PE=1 SV=3	21.426	Asap2	1×Phospho	S704	2.77	0.000582222	HTP
Q8BHE3	Caytaxin OS=Mus musculus OX=10090 GN=Atcay PE=1 SV=1	62.191	Atcay	1×Deamidated [Q21]; 1×Phospho [S/T]	[347-372]	4.321	0.000503717	-
Q8VDN2	Sodium/potassium-transporting ATPase subunit alpha-1 OS=Mus musculus OX=10090 GN=Atp1a1 PE=1 SV=1	428.08	Atp1a1	1×Deamidated [N/Q]; 1×Phospho	S228	6.075	2.33958e-08	HTP
				1×Phospho	S228	1.938	0.0277677	HTP
				1×Phospho	S228	1.724	0.0382694	HTP
Q6PIE5	Sodium/potassium-transporting ATPase subunit alpha-2 OS=Mus musculus OX=10090 GN=Atp1a2 PE=1 SV=1	398.63	Atp1a2	1×Phospho [S/T]	[211-238]	4.016	0.00111238	-
G5E829	Plasma membrane calcium-transporting ATPase 1 OS=Mus musculus OX=10090 GN=Atp2b1 PE=1 SV=1	179.71	Atp2b1	1×Oxidation [M]; 1×Phospho	S338	2.83	0.000439614	HTP
P70704	Phospholipid-transporting ATPase IA OS=Mus musculus OX=10090 GN=Atp8a1 PE=1 SV=2	131.395	Atp8a1	3×Phospho	S25; T28; S29	2.421	0.000382764	HTP (all)
				1×Phospho	S29	2.766	0.000526039	HTP
				2×Phospho	S25; S29	2.017	0.00165915	HTP (both)
				1×Phospho [T/S]	[28-48]	0.273	0.00623417	-
				3×Phospho	S25; T28; S29	2.312	0.00731404	HTP (all)
Q8CCN5	BCAS3 microtubule associated cell migration factor OS=Mus musculus OX=10090 GN=Bcas3 PE=1 SV=2	43.618	Bcas3	1×Deamidated [N/Q]; 1×Phospho	T499	4.213	0.00163423	Not found in PhosphositePlus
O55028	[3-methyl-2-oxobutanoate dehydrogenase [lipoamide]] kinase, mitochondrial OS=Mus musculus OX=10090 GN=Bckdk PE=1 SV=1	29.308	Bckdk	1×Phospho [S/T]	[31-46]	2.248	0.0203251	-
				1×Phospho [S/T]	[31-44]	1.759	0.0279162	-
Q6PAJ1	Breakpoint cluster region protein OS=Mus musculus OX=10090 GN=Bcr PE=1 SV=3	90.159	Bcr	1×Phospho	S303	0.155	1.27899e-13	HTP
Q68EF6	Brain-enriched guanylate kinase-associated protein OS=Mus musculus OX=10090 GN=Begain PE=1 SV=2	119.243	Begain	1×Phospho	S588	0.232	2.01835e-09	HTP
				2×Phospho	S262; S265	2.219	0.00603055	HTP (both)
O08539	Myc box-dependent-interacting protein 1 OS=Mus musculus OX=10090 GN=Bin1 PE=1 SV=1	473.016	Bin1	2×Deamidated [N2; N22]; 2×Phospho	S296; S298	0.25	7.4305e-09	HTP (both)
O55003	BCL2/adenovirus E1B 19 kDa protein-interacting protein 3 OS=Mus musculus OX=10090 GN=Bnip3 PE=1 SV=1	36.908	Bnip3	1×Phospho	S88	2.132	0.00656579	HTP/LTP
Q9Z2F7	BCL2/adenovirus E1B 19 kDa protein-interacting protein 3-like OS=Mus musculus OX=10090 GN=Bnip3l PE=1 SV=1	65.536	Bnip3l	2×Deamidated [N1; N15]; 1×Oxidation [M18]; 1×Phospho	S64	3.028	0.000750096	HTP
				1×Deamidated [N]; 2×Phospho [S]	[53-72]	0.383	0.00871887	-
Q8CFK2	Transcription factor IIIB 90 kDa subunit OS=Mus musculus OX=10090 GN=Brf1 PE=1 SV=1	5.286	Brf1	1×Oxidation [M18]; 1×Phospho [T/S]	[264-282]	2.824	0.0300226	-
O88737	Protein bassoon OS=Mus musculus OX=10090 GN=Bsn PE=1 SV=4	922.601	Bsn	1×Oxidation [M24]; 2×Phospho	S1108; S1114	3.371	1.02948e-09	HTP (both)	Also aligned with protein piccolo (Accession Q9QYX7)
				2×Phospho	S1108; S1114	0.331	0.000107673	HTP (both)
				1×Oxidation [M24]; 3×Phospho	T1102; S1108; S1114	3.031	0.000527526	HTP (all)
				1×Oxidation [M26]; 3×Phospho [S9(99); S15(100); S/T]	S1108; S1114; S/T [1100-1130]	2.927	0.000768158	HTP (both)
				2×Phospho [S31(100); S/T/Y]	S1486; S/T/Y [1456-1500]	0.361	0.000788553	HTP
				1×Oxidation [M6]; 1×Phospho	S865	3.071	0.00388227	HTP
Q80X80	Phospholipid transfer protein C2CD2L OS=Mus musculus OX=10090 GN=C2cd2l PE=1 SV=3	160.005	C2cd2l	1×Carbamidomethyl [C4]; 1×Oxidation [M24]; 1×Phospho	S374	0.265	0.00217319	HTP
Q61290	Voltage-dependent R-type calcium channel subunit alpha-1E OS=Mus musculus OX=10090 GN=Cacna1e PE=1 SV=1	175.957	Cacna1e	1×Carbamidomethyl [C11]; 1×Oxidation [M16]; 1×Phospho [S/T]	[1047-1064]	3.16	0.00660897	-
Q8R3Z5	Voltage-dependent L-type calcium channel subunit beta-1 OS=Mus musculus OX=10090 GN=Cacnb1 PE=1 SV=1	88.84	Cacnb1	1×Gln->pyro-Glu [N-Term]; 1×Phospho	S59	0.01	2.10407e-16	HTP
Q8R0S4	Voltage-dependent L-type calcium channel subunit beta-4 OS=Mus musculus OX=10090 GN=Cacnb4 PE=1 SV=2	67.713	Cacnb4	1×Oxidation [M10]; 2×Phospho [T11(100); S/T]	T410; S/T [400-415]	2.319	0.0158185	HTP
B2RQC6	CAD protein OS=Mus musculus OX=10090 GN=Cad PE=1 SV=1	8.462	Cad	1×Phospho	S1859	5.811	4.66514e-06	HTP/LTP
Q8R464	Cell adhesion molecule 4 OS=Mus musculus OX=10090 GN=Cadm4 PE=1 SV=1	61.21	Cadm4	1×Phospho	S354	0.561	0.0348948	Not found in PhosphositePlus
Q80TJ1	Calcium-dependent secretion activator 1 OS=Mus musculus OX=10090 GN=Cadps PE=1 SV=3	135.008	Cadps	1×Oxidation [M21]; 1×Phospho	S1347	2.998	9.03749e-07	HTP/LTP
				1×Oxidation [M23]; 1×Phospho	S1347	2.131	0.00246284	HTP/LTP
Q8BYR5	Calcium-dependent secretion activator 2 OS=Mus musculus OX=10090 GN=Cadps2 PE=1 SV=2	41.642	Cadps2	1×Oxidation [M22]; 1×Phospho	S1291	3.275	0.0213608	HTP
P0DP27	Calmodulin-2 OS=Mus musculus OX=10090 GN=Calm2 PE=1 SV=1	56.124	Calm2	1×Phospho	S102	32.614	2.10407e-16	HTP/LTP
P11798	Calcium/calmodulin-dependent protein kinase type II subunit alpha OS=Mus musculus OX=10090 GN=Camk2a PE=1 SV=2	526.123	Camk2a	2×Carbamidomethyl [C6; C15]; 1×Phospho	T286	0.01	2.10407e-16	HTP/LTP
				1×Carbamidomethyl [C6]; 1×Gln->pyro-Glu [N-Term]; 1×Phospho	T286	0.658	0.0419638	HTP/LTP	Also aligned with Camk2d (Accession Q6PHZ2)
Q6PHZ2	Calcium/calmodulin-dependent protein kinase type II subunit delta OS=Mus musculus OX=10090 GN=Camk2d PE=1 SV=1	126.28	Camk2d	1×Carbamidomethyl [C6]; 1×Gln->pyro-Glu [N-Term]; 1×Phospho	T287	0.658	0.0419638	HTP/LTP	Also aligned with Camk2a (Accession P11798)
Q3UHL1	CaM kinase-like vesicle-associated protein OS=Mus musculus OX=10090 GN=Camkv PE=1 SV=2	94.795	Camkv	2×Phospho	S412; T414	2.948	0.0113327	S412 - Not found in PhosphositePlus; HTP (T414)
A2AHC3	Calmodulin-regulated spectrin-associated protein 1 OS=Mus musculus OX=10090 GN=Camsap1 PE=1 SV=1	17.621	Camsap1	1×Oxidation [M10]; 1×Phospho	S550	4.076	0.000773005	HTP
P35564	Calnexin OS=Mus musculus OX=10090 GN=Canx PE=1 SV=1	274.576	Canx	2×Phospho	S553; S563	0.66	0.0440065	HTP/LTP (both)
				1×Deamidated [N8]; 1×Phospho	S582	1.686	0.0481571	HTP/LTP
P51675	C-C chemokine receptor type 1 OS=Mus musculus OX=10090 GN=Ccr1 PE=2 SV=2	2.306	Ccr1	2×Phospho	S341; S352	100	2.10407e-16	HTP (both)
Q64314	Hematopoietic progenitor cell antigen CD34 OS=Mus musculus OX=10090 GN=Cd34 PE=1 SV=1	71.637	Cd34	2×Deamidated [N10; Q14]; 1×Phospho [S/T/Y]	[321-349]	0.01	2.10407e-16	-
				1×Deamidated [N/Q]; 1×Phospho	S343	0.01	2.10407e-16	HTP
Q7TT50	Serine/threonine-protein kinase MRCK beta OS=Mus musculus OX=10090 GN=Cdc42bpb PE=1 SV=2	39.078	Cdc42bpb	1×Carbamidomethyl [C34]; 1×Oxidation [M26]; 2×Phospho [S/T]	[1678-1713]	3.19	0.0210373	-
Q9JKC6	Cell cycle exit and neuronal differentiation protein 1 OS=Mus musculus OX=10090 GN=Cend1 PE=1 SV=1	162.204	Cend1	1×Phospho	S90	0.411	0.00417078	HTP
Q6A065	Centrosomal protein of 170 kDa OS=Mus musculus OX=10090 GN=Cep170 PE=1 SV=2	209.118	Cep170	2×Phospho [T/S/Y]	[906-942]	3.09	0.0491752	-
P26339	Chromogranin-A OS=Mus musculus OX=10090 GN=Chga PE=1 SV=1	54.476	Chga	1×Phospho [S]	[103-136]	0.179	9.54046e-05	-
P70232	Neural cell adhesion molecule L1-like protein OS=Mus musculus OX=10090 GN=Chl1 PE=1 SV=2	50.969	Chl1	1×Oxidation [M2]; 1×Phospho [T/S/Y]	[1155-1190]	100	2.10407e-16	-
Q60771	Claudin-11 OS=Mus musculus OX=10090 GN=Cldn11 PE=1 SV=1	19.815	Cldn11	1×Phospho [S/T/Y]	[190-203]	2.553	3.22951e-06	-
Q80YA9	Connector enhancer of kinase suppressor of ras 2 OS=Mus musculus OX=10090 GN=Cnksr2 PE=1 SV=1	123.568	Cnksr2	1×Carbamidomethyl [C19]; 1×Deamidated [Q1]; 1×Oxidation [M17]; 1×Phospho	S702	2.849	0.000736622	HTP
P26231	Catenin alpha-1 OS=Mus musculus OX=10090 GN=Ctnna1 PE=1 SV=1	140.655	Ctnna1	1×Phospho	S641	2.059	0.00181419	HTP/LTP
				1×Phospho	S655	1.685	0.0489509	HTP/LTP	Also aligned with Ctnna2 (Accession Q61301)
Q61301	Catenin alpha-2 OS=Mus musculus OX=10090 GN=Ctnna2 PE=1 SV=3	401.102	Ctnna2	1×Deamidated [Q13]; 1×Phospho	S640	4.642	0.00015008	HTP
				1×Phospho	S640	1.818	0.013355	HTP
				1×Phospho	S654	1.685	0.0489509	HTP	Also aligned with Ctnna1 (Accession P26231)
P30999	Catenin delta-1 OS=Mus musculus OX=10090 GN=Ctnnd1 PE=1 SV=2	25.876	Ctnnd1	2×Phospho [S/Y/T]	[859-875]	8.228	6.3432e-07	-
O35927	Catenin delta-2 OS=Mus musculus OX=10090 GN=Ctnnd2 PE=1 SV=1	200.715	Ctnnd2	1×Phospho [S/T]	[28-56]	0.01	2.10407e-16	-
				3×Deamidated [N11; N13; N]; 1×Phospho	S969	2.713	0.0158185	Not found in PhosphositePlus
				1×Phospho	S412	2.253	0.0232635	HTP
				2×Deamidated [N]; 1×Phospho	S969	2.654	0.0351494	Not found in PhosphositePlus
Q9JHS9	Spliceosome-associated protein CWC15 homolog OS=Mus musculus OX=10090 GN=Cwc15 PE=1 SV=1	22.046	Cwc15	1×Deamidated [N8]; 2×Phospho [T/S]	[95-135]	100	2.10407e-16	-
Q9Z1R4	Uncharacterized protein C6orf47 homolog OS=Mus musculus OX=10090 GN=D17h6s53e PE=1 SV=1	3.21	D17h6s53e	1×Oxidation [M20]; 1×Phospho [S/T]	[31-57]	0.01	2.10407e-16	-
Q80U19	Disheveled-associated activator of morphogenesis 2 OS=Mus musculus OX=10090 GN=Daam2 PE=1 SV=4	20.387	Daam2	1×Phospho [S/T/Y]	[701-713]	13.956	2.10407e-16	-
Q6WQJ1	Diacylglycerol lipase-alpha OS=Mus musculus OX=10090 GN=Dagla PE=1 SV=2	48.241	Dagla	1×Deamidated [Q]; 2×Phospho	S874; T876	100	2.10407e-16	Not found in PhosphositePlus (S874); HTP (T876)
Q9QXS6	Drebrin OS=Mus musculus OX=10090 GN=Dbn1 PE=1 SV=4	108.028	Dbn1	1×Carbamidomethyl [C25]; 1×Deamidated [Q]; 1×Phospho	T648	100	2.10407e-16	Not found in PhosphositePlus
				1×Phospho	S387	2.854	0.00471718	HTP
Q9JLM8	Serine/threonine-protein kinase DCLK1 OS=Mus musculus OX=10090 GN=Dclk1 PE=1 SV=1	329.076	Dclk1	1×Phospho	S352	0.526	0.0137953	HTP
				1×Phospho	S392	2.125	0.0332774	HTP
Q8K382	DENN domain-containing protein 1A OS=Mus musculus OX=10090 GN=Dennd1a PE=1 SV=2	36.871	Dennd1a	1×Phospho	S510	0.468	0.0133855	HTP
				2×Phospho [S12(100); S/T]	S546; S/T [535-564]	2.201	0.039	HTP
Q6NS52	Diacylglycerol kinase beta OS=Mus musculus OX=10090 GN=Dgkb PE=1 SV=2	7.117	Dgkb	1×Phospho	S95	0.537	0.0300226	HTP
Q811D0	Disks large homolog 1 OS=Mus musculus OX=10090 GN=Dlg1 PE=1 SV=1	16.655	Dlg1	1×Carbamidomethyl [C2]; 1×Phospho	S102	0.254	0.000137223	HTP
Q91XM9	Disks large homolog 2 OS=Mus musculus OX=10090 GN=Dlg2 PE=1 SV=2	96.963	Dlg2	1×Phospho	S28	3.677	2.45363e-06	HTP
P70175	Disks large homolog 3 OS=Mus musculus OX=10090 GN=Dlg3 PE=1 SV=1	7.727	Dlg3	1×Deamidated [N/Q]; 2×Phospho [S/T/Y]	[626-653]	0.01	2.10407e-16	-
Q62108	Disks large homolog 4 OS=Mus musculus OX=10090 GN=Dlg4 PE=1 SV=1	65.556	Dlg4	1×Phospho	S654	3.261	0.0203251	HTP
Q9D415	Disks large-associated protein 1 OS=Mus musculus OX=10090 GN=Dlgap1 PE=1 SV=3	295.212	Dlgap1	1×Carbamidomethyl [C30]; 1×Oxidation [M34]; 2×Phospho [S21(98.5); S/T]	S728; S/T [708-743]	5.653	1.11832e-05	Not found in PhosphositePlus
				2×Phospho	S973; S980	2.916	0.039213	HTP/LTP (S973); Not found in PhosphositePlus (S980)
				1×Phospho	S499	0.38	0.0433326	HTP/LTP
Q8BJ42	Disks large-associated protein 2 OS=Mus musculus OX=10090 GN=Dlgap2 PE=1 SV=2	202.419	Dlgap2	1×Oxidation [M3]; 1×Phospho [S/T/Y]	[294-313]	2.956	0.0284453	-
				1×Phospho	S757	0.383	0.0439729	HTP
				2×Phospho [S10(99.7); S/T/Y]	S1047; S/T/Y [1038-1059]	1.979	0.0440065	HTP
Q6PFD5	Disks large-associated protein 3 OS=Mus musculus OX=10090 GN=Dlgap3 PE=1 SV=1	100.014	Dlgap3	1×Carbamidomethyl [C2]; 1×Phospho [S/T]	[576-591]	2.543	0.00282949	-
Q9WV69	Dematin OS=Mus musculus OX=10090 GN=Dmtn PE=1 SV=1	183.471	Dmtn	1×Phospho [S/T]	[90-116]	0.15	2.22556e-09	-
P60904	DnaJ homolog subfamily C member 5 OS=Mus musculus OX=10090 GN=Dnajc5 PE=1 SV=1	156.722	Dnajc5	1×Met-loss+Acetyl [N-Term]; 1×Phospho	S10	0.048	2.10407e-16	HTP/LTP
				1×Phospho [S/T/Y]	[6-24]	0.325	3.03103e-05	-
				1×Gln->pyro-Glu [N-Term]; 2×Phospho	S8; S10	2.385	0.00735662	HTP (S8); HTP/LTP (S10)
Q80TZ3	Putative tyrosine-protein phosphatase auxilin OS=Mus musculus OX=10090 GN=Dnajc6 PE=1 SV=2	208.524	Dnajc6	1×Carbamidomethyl [C3]; 1×Deamidated [N/Q]; 1×Phospho [S/T]	[464-504]	0.01	2.10407e-16	-
Q8R1A4	Dedicator of cytokinesis protein 7 OS=Mus musculus OX=10090 GN=Dock7 PE=1 SV=3	68.021	Dock7	2×Phospho	S1422; S1428	3.068	0.0263051	HTP (both)
Q6NXK7	Inactive dipeptidyl peptidase 10 OS=Mus musculus OX=10090 GN=Dpp10 PE=1 SV=1	20.579	Dpp10	1×Phospho	S25	2.233	0.0236303	HTP
O08553	Dihydropyrimidinase-related protein 2 OS=Mus musculus OX=10090 GN=Dpysl2 PE=1 SV=2	371.171	Dpysl2	1×Carbamidomethyl [C12]; 1×Phospho	T509	0.01	2.10407e-16	HTP/LTP
				1×Phospho	S522	0.581	0.00313142	HTP/LTP
Q9DD18	D-aminoacyl-tRNA deacylase 1 OS=Mus musculus OX=10090 GN=Dtd1 PE=1 SV=2	51.064	Dtd1	1×Phospho [S]	[191-209]	0.428	0.000466618	-
O88485	Cytoplasmic dynein 1 intermediate chain 1 OS=Mus musculus OX=10090 GN=Dync1i1 PE=1 SV=2	95.543	Dync1i1	2×Deamidated [Q3; Q10]; 1×Oxidation [M20]; 1×Phospho	S162	100	2.10407e-16	HTP
Q61214	Dual specificity tyrosine-phosphorylation-regulated kinase 1A OS=Mus musculus OX=10090 GN=Dyrk1a PE=1 SV=1	11.087	Dyrk1a	1×Phospho	Y321	3.073	8.40243e-05	HTP/LTP
P57776	Elongation factor 1-delta OS=Mus musculus OX=10090 GN=Eef1d PE=1 SV=3	143.384	Eef1d	1×Phospho	S162	11.675	2.10407e-16	HTP/LTP
Q8C0D5	Elongation factor-like GTPase 1 OS=Mus musculus OX=10090 GN=Efl1 PE=1 SV=1	8.807	Efl1	1×Deamidated [Q]; 1×Phospho [T/S]	[453-492]	9.949	8.94459e-13	-
Q9QXY6	EH domain-containing protein 3 OS=Mus musculus OX=10090 GN=Ehd3 PE=1 SV=2	35.98	Ehd3	1×Phospho	S456	0.403	0.00436665	HTP
Q8JZQ9	Eukaryotic translation initiation factor 3 subunit B OS=Mus musculus OX=10090 GN=Eif3b PE=1 SV=1	187.222	Eif3b	2×Phospho	S75; S79	0.475	0.00276653	HTP (both)
				2×Phospho [S23(100); S]	S153; S [131-163]	2.296	0.0384372	HTP
Q3UGC7	Eukaryotic translation initiation factor 3 subunit J-A OS=Mus musculus OX=10090 GN=Eif3j1 PE=2 SV=1	17.802	Eif3j1	1×Met-loss+Acetyl [N-Term]; 1×Phospho	S14	0.377	0.000540658	HTP
Q8BGD9	Eukaryotic translation initiation factor 4B OS=Mus musculus OX=10090 GN=Eif4b PE=1 SV=1	194.066	Eif4b	1×Phospho	S504	0.344	2.84182e-05	HTP/LTP
				2×Phospho [S17(99.2); S/T]	S504; S/T [488-511]	0.272	7.83605e-05	HTP/LTP
				1×Carbamidomethyl [C13]; 1×Deamidated [N/Q]; 1×Phospho [T/S]	[445-472]	2.083	0.0277704	-
Q80XI3	Eukaryotic translation initiation factor 4 gamma 3 OS=Mus musculus OX=10090 GN=Eif4g3 PE=1 SV=2	86.192	Eif4g3	3×Carbamidomethyl [C1; C20; C35]; 1×Deamidated [N31]; 1×Phospho [S/T]	[299-334]	5.431	3.36036e-05	-
Q8C8T7	Protein ELFN1 OS=Mus musculus OX=10090 GN=Elfn1 PE=2 SV=1	20.66	Elfn1	1×Phospho [S/T]	[674-697]	0.182	0.000122869	-
P21995	Embigin OS=Mus musculus OX=10090 GN=Emb PE=1 SV=2	56.862	Emb	2×Deamidated [N/Q]; 2×Phospho	S309; S312	2.088	0.048986	HTP (both)
Q9Z2H5	Band 4.1-like protein 1 OS=Mus musculus OX=10090 GN=Epb41l1 PE=1 SV=2	339.17	Epb41l1	1×Carbamidomethyl [C21]; 1×Deamidated [Q]; 1×Phospho	S677	6.606	1.31266e-05	HTP
Q9WV92	Band 4.1-like protein 3 OS=Mus musculus OX=10090 GN=Epb41l3 PE=1 SV=1	387.938	Epb41l3	1×Phospho	S804	2.667	0.00373704	HTP
				1×Deamidated [N10]; 1×Oxidation [M15]; 2×Phospho [S1(100); S/Y]	S451; S/Y [451-466]	2.032	0.0450193	HTP
Q60629	Ephrin type-A receptor 5 OS=Mus musculus OX=10090 GN=Epha5 PE=1 SV=2	4.136	Epha5	1×Phospho [Y/T]	[663-675]	100	2.10407e-16	-
Q80VP1	Epsin-1 OS=Mus musculus OX=10090 GN=Epn1 PE=1 SV=3	38.636	Epn1	1×Phospho	S418	0.407	0.00220258	HTP
P70429	Ena/VASP-like protein OS=Mus musculus OX=10090 GN=Evl PE=1 SV=2	27.099	Evl	1×Phospho	S329	0.446	0.0387344	HTP
A2A699	Protein FAM171A2 OS=Mus musculus OX=10090 GN=Fam171a2 PE=1 SV=1	155.99	Fam171a2	1×Phospho [S/T]	[776-804]	2.578	0.00298731	-
				1×Carbamidomethyl [C19]; 1×Phospho	S739	0.501	0.00669756	HTP
Q8BR63	Protein FAM177A1 OS=Mus musculus OX=10090 GN=Fam177a1 PE=1 SV=1	45.778	Fam177a1	1×Oxidation [M11]; 2×Phospho	S65; T66	3.609	0.017735	HTP (both)
Q8BYI8	Protein FAM234B OS=Mus musculus OX=10090 GN=Fam234b PE=1 SV=1	77.316	Fam234b	2×Phospho	S30; S33	2.448	0.00463614	HTP (both)
				2×Phospho	S30; S33	2.303	0.0123543	HTP (both)
F8VPU2	FERM, ARHGEF and pleckstrin domain-containing protein 1 OS=Mus musculus OX=10090 GN=Farp1 PE=1 SV=1	125.25	Farp1	1×Carbamidomethyl [C2]; 1×Phospho	S427	0.4	0.00341481	HTP
Q8K2I1	Protein farnesyltransferase subunit beta OS=Mus musculus OX=10090 GN=Fntb PE=1 SV=1	5.613	Fntb	1×Carbamidomethyl [C19]; 1×Deamidated [Q10]; 1×Phospho [T/S]	[408-437]	100	2.10407e-16	-
				1×Carbamidomethyl [C19]; 1×Phospho [T/S]	[408-437]	0.345	0.0117715	-
Q9DB70	FUN14 domain-containing protein 1 OS=Mus musculus OX=10090 GN=Fundc1 PE=1 SV=1	55.488	Fundc1	1×Phospho	S13	3.075	5.32528e-09	HTP/LTP
P97855	Ras GTPase-activating protein-binding protein 1 OS=Mus musculus OX=10090 GN=G3bp1 PE=1 SV=1	25.742	G3bp1	1×Phospho	S231	1.791	0.0225409	HTP/LTP
P48318	Glutamate decarboxylase 1 OS=Mus musculus OX=10090 GN=Gad1 PE=1 SV=2	13.388	Gad1	1×Carbamidomethyl [C2]; 1×Phospho	S55	0.46	0.04991	HTP
Q99KY4	Cyclin-G-associated kinase OS=Mus musculus OX=10090 GN=Gak PE=1 SV=2	98.194	Gak	2×Phospho	S813; S824	4.442	0.00138702	HTP (both)
				1×Deamidated [Q3]; 1×Phospho [S/T]	[812-849]	3.013	0.0261866	-
				1×Phospho	S813	3.045	0.0304576	HTP
P47212	Galanin peptides OS=Mus musculus OX=10090 GN=Gal PE=2 SV=1	9.931	Gal	1×Phospho [T/S]	[102-123]	0.01	2.10407e-16	-
Q60780	Growth arrest-specific protein 7 OS=Mus musculus OX=10090 GN=Gas7 PE=1 SV=1	36.628	Gas7	1×Phospho	S114	0.284	0.0016102	Not found in PhosphositePlus
Q68FF6	ARF GTPase-activating protein GIT1 OS=Mus musculus OX=10090 GN=Git1 PE=1 SV=1	337.032	Git1	1×Phospho	S601	3.246	0.00344801	HTP
				1×Phospho	S419	0.362	0.0175534	HTP/LTP
Q9JLQ2	ARF GTPase-activating protein GIT2 OS=Mus musculus OX=10090 GN=Git2 PE=1 SV=2	26.102	Git2	1×Deamidated [N/Q]; 1×Phospho	S396	4.71	2.56821e-05	HTP
P23242	Gap junction alpha-1 protein OS=Mus musculus OX=10090 GN=Gja1 PE=1 SV=2	97.491	Gja1	2×Deamidated [N/Q]; 1×Oxidation [M1]; 1×Phospho [T/S]	[320-345]	2.448	0.0026084	-
D3Z7P3	Glutaminase kidney isoform, mitochondrial OS=Mus musculus OX=10090 GN=Gls PE=1 SV=1	62.362	Gls	1×Deamidated [N/Q]; 1×Phospho	S657	0.345	0.0205437	HTP
Q9DAS9	Guanine nucleotide-binding protein G(I)/G(S)/G(O) subunit gamma-12 OS=Mus musculus OX=10090 GN=Gng12 PE=1 SV=3	21.269	Gng12	2×Phospho	S7; S10	3.79	0.00525262	HTP (both)
P63216	Guanine nucleotide-binding protein G(I)/G(S)/G(O) subunit gamma-3 OS=Mus musculus OX=10090 GN=Gng3 PE=1 SV=1	60.673	Gng3	1×Deamidated [N8]; 2×Oxidation [M1; M11]; 1×Phospho	T5	3.641	0.00347409	HTP
Q6P2L7	Protein GOLM2 OS=Mus musculus OX=10090 GN=Golm2 PE=1 SV=1	27.848	Golm2	1×Phospho	S365	0.395	0.0433638	HTP
Q8BUV3	Gephyrin OS=Mus musculus OX=10090 GN=Gphn PE=1 SV=2	130.005	Gphn	2×Phospho [T15(95.6); T/S]	T266; T/S [252-272]	7.316	8.46927e-08	HTP/LTP
P35802	Neuronal membrane glycoprotein M6-a OS=Mus musculus OX=10090 GN=Gpm6a PE=1 SV=1	187.125	Gpm6a	1×Phospho	T278	0.572	0.034091	HTP
Q3UNH4	G protein-regulated inducer of neurite outgrowth 1 OS=Mus musculus OX=10090 GN=Gprin1 PE=1 SV=2	177.522	Gprin1	1×Phospho	S894	0.367	6.34839e-08	HTP
				1×Deamidated [N]; 1×Oxidation [M19]; 1×Phospho	S219	2.368	0.00644446	HTP
				1×Phospho	S714	2.855	0.0494435	HTP
Q99LD4	COP9 signalosome complex subunit 1 OS=Mus musculus OX=10090 GN=Gps1 PE=1 SV=1	44.246	Gps1	1×Phospho	S454	1.977	0.00448001	HTP/LTP
Q6IR34	G-protein-signaling modulator 1 OS=Mus musculus OX=10090 GN=Gpsm1 PE=1 SV=3	95.528	Gpsm1	1×Carbamidomethyl [C13]; 1×Phospho [S/T]	[483-502]	0.301	0.00371643	-
Q8CB44	GRAM domain-containing protein 4 OS=Mus musculus OX=10090 GN=Gramd4 PE=1 SV=1	5.761	Gramd4	1×Carbamidomethyl [C18]; 2×Phospho [S10(100); S/T]	S75; S/T [66-90]	13.496	2.10407e-16	HTP
P35436	Glutamate receptor ionotropic, NMDA 2A OS=Mus musculus OX=10090 GN=Grin2a PE=1 SV=2	105.76	Grin2a	1×Oxidation [M15]; 2×Phospho	S882; S890	2.846	0.0314394	HTP (both)
Q9WV60	Glycogen synthase kinase-3 beta OS=Mus musculus OX=10090 GN=Gsk3b PE=1 SV=2	59.899	Gsk3b	2×Deamidated [N]; 1×Phospho	S389	2.977	0.0265357	HTP/LTP
Q640R3	Hepatocyte cell adhesion molecule OS=Mus musculus OX=10090 GN=Hepacam PE=1 SV=2	262.471	Hepacam	2×Phospho [S4(99.5); S/T]	S379; S/T [376-391]	0.528	0.000379155	HTP
Q8VD75	Huntingtin-interacting protein 1 OS=Mus musculus OX=10090 GN=Hip1 PE=1 SV=2	17.259	Hip1	1×Phospho [S]	[301-329]	0.257	0.000237119	-
Q9Z204	Heterogeneous nuclear ribonucleoproteins C1/C2 OS=Mus musculus OX=10090 GN=Hnrnpc PE=1 SV=1	22.626	Hnrnpc	1×Deamidated [N/Q]; 1×Phospho	S268	100	2.10407e-16	HTP/LTP
Q8VEK3	Heterogeneous nuclear ribonucleoprotein U OS=Mus musculus OX=10090 GN=Hnrnpu PE=1 SV=1	5.651	Hnrnpu	1×Met-loss+Acetyl [N-Term]; 1×Phospho	S4	0.568	0.0238446	HTP
Q9Z2Y3	Homer protein homolog 1 OS=Mus musculus OX=10090 GN=Homer1 PE=1 SV=2	67.011	Homer1	2×Deamidated [N/Q]; 1×Oxidation [M1]; 1×Phospho	S144	2.62	0.00833972	HTP
P07901	Heat shock protein HSP 90-alpha OS=Mus musculus OX=10090 GN=Hsp90aa1 PE=1 SV=4	312.735	Hsp90aa1	1×Phospho	S231	0.365	6.89641e-05	HTP/LTP
				1×Phospho	S231	0.609	0.0175534	HTP/LTP
Q8K0U4	Heat shock 70 kDa protein 12A OS=Mus musculus OX=10090 GN=Hspa12a PE=1 SV=1	61.499	Hspa12a	2×Phospho	S23; S24	100	2.10407e-16	HTP (both)
Q61316	Heat shock 70 kDa protein 4 OS=Mus musculus OX=10090 GN=Hspa4 PE=1 SV=1	86.859	Hspa4	1×Oxidation [M]; 1×Phospho	T540	0.339	0.0456575	HTP
P14602	Heat shock protein beta-1 OS=Mus musculus OX=10090 GN=Hspb1 PE=1 SV=3	9.356	Hspb1	1×Phospho	S86	2.986	0.0381063	HTP/LTP
Q61699	Heat shock protein 105 kDa OS=Mus musculus OX=10090 GN=Hsph1 PE=1 SV=2	302.034	Hsph1	1×Deamidated [N11]; 1×Phospho	S810	0.47	0.00268292	HTP
				1×Deamidated [N/Q]; 1×Phospho	S558	2.023	0.0354853	HTP
P42859	Huntingtin OS=Mus musculus OX=10090 GN=Htt PE=1 SV=2	35.661	Htt	1×Carbamidomethyl [C16]; 1×Oxidation [M15]; 1×Phospho	S1853	100	2.10407e-16	HTP/LTP
Q7TMY8	E3 ubiquitin-protein ligase HUWE1 OS=Mus musculus OX=10090 GN=Huwe1 PE=1 SV=5	99.589	Huwe1	1×Phospho	S2743	0.359	0.0164307	HTP
Q6ZQA6	Immunoglobulin superfamily member 3 OS=Mus musculus OX=10090 GN=Igsf3 PE=1 SV=2	26.991	Igsf3	1×Phospho	S1019	2.727	0.0199821	HTP
Q80VY2	PAK4-inhibitor INKA2 OS=Mus musculus OX=10090 GN=Inka2 PE=2 SV=1	3.069	Inka2	1×Phospho [T/S]	[273-283]	0.319	0.00168988	-
Q8R0S2	IQ motif and SEC7 domain-containing protein 1 OS=Mus musculus OX=10090 GN=Iqsec1 PE=1 SV=2	247.475	Iqsec1	1×Carbamidomethyl [C25]; 1×Phospho	S937	0.201	1.68564e-08	HTP
P35569	Insulin receptor substrate 1 OS=Mus musculus OX=10090 GN=Irs1 PE=1 SV=1	11.186	Irs1	1×Oxidation [M9]; 1×Phospho [S/T]	[323-348]	100	2.10407e-16	-
P52332	Tyrosine-protein kinase JAK1 OS=Mus musculus OX=10090 GN=Jak1 PE=1 SV=1	2.628	Jak1	1×Deamidated [Q3]; 1×Phospho [Y/S]	[559-576]	6.619	1.25994e-07	-
Q8BNW9	Kelch repeat and BTB domain-containing protein 11 OS=Mus musculus OX=10090 GN=Kbtbd11 PE=1 SV=3	47.88	Kbtbd11	2×Phospho	S67; S70	2.837	0.001684	HTP (both)
A6H8H5	Potassium voltage-gated channel subfamily B member 2 OS=Mus musculus OX=10090 GN=Kcnb2 PE=1 SV=2	17.978	Kcnb2	1×Phospho	S488	8.283	3.20906e-09	HTP/LTP
Q9Z0V1	Potassium voltage-gated channel subfamily D member 3 OS=Mus musculus OX=10090 GN=Kcnd3 PE=1 SV=1	14.404	Kcnd3	2×Oxidation [M2; M14]; 1×Phospho	S153	3.969	2.70401e-05	HTP
P48542	G protein-activated inward rectifier potassium channel 2 OS=Mus musculus OX=10090 GN=Kcnj6 PE=1 SV=1	13.365	Kcnj6	2×Oxidation [M5; M14]; 1×Phospho	S25	3.542	0.00475633	HTP
				2×Oxidation [M5; M14]; 2×Phospho	T7; S25	3.682	0.0066882	Not found in PhosphositePlus (T7); HTP (S25)
Q5DTY9	BTB/POZ domain-containing protein KCTD16 OS=Mus musculus OX=10090 GN=Kctd16 PE=1 SV=2	118.256	Kctd16	1×Carbamidomethyl [C15]; 2×Phospho	S130; S137	2.27	0.000113875	HTP (both)
				1×Carbamidomethyl [C15]; 1×Deamidated [Q9]; 1×Phospho	S130	2.914	0.000809014	HTP
Q80TK0	AP2-interacting clathrin-endocytosis protein OS=Mus musculus OX=10090 GN=Kiaa1107 PE=1 SV=6	63.098	Kiaa1107	1×Phospho	S722	9.371	5.2791e-12	HTP
				1×Phospho	S785	3.303	0.00153763	HTP
				1×Gln->pyro-Glu [N-Term]; 1×Phospho	S785	2.454	0.0201808	HTP
Q8BRV5	Uncharacterized protein KIAA1671 OS=Mus musculus OX=10090 GN=Kiaa1671 PE=2 SV=1	42.366	Kiaa1671	2×Deamidated [N/Q]; 2×Phospho	S62; S64	2.728	0.00401606	Not found in PhosphositePlus (S62); HTP (S64)
				2×Deamidated [N/Q]; 1×Phospho	S64	3.483	0.0104698	HTP
Q60575	Kinesin-like protein KIF1B OS=Mus musculus OX=10090 GN=Kif1b PE=1 SV=2	17.536	Kif1b	1×Carbamidomethyl [C5]; 1×Phospho [S/T/Y]	[1657-1680]	0.357	0.0297454	-
O88447	Kinesin light chain 1 OS=Mus musculus OX=10090 GN=Klc1 PE=1 SV=3	31.466	Klc1	1×Phospho	S162	0.656	0.0440065	HTP
O88448	Kinesin light chain 2 OS=Mus musculus OX=10090 GN=Klc2 PE=1 SV=1	105.874	Klc2	1×Deamidated [N/Q]; 2×Phospho	S174; S178	6.939	3.82479e-13	HTP (both)
				2×Phospho	S174; S178	2.761	0.00061633	HTP (both)
				1×Phospho [S]	[572-581]	0.373	0.0282191	-
Q8K0B2	Lysosomal cobalamin transport escort protein LMBD1 OS=Mus musculus OX=10090 GN=Lmbrd1 PE=1 SV=1	8.444	Lmbrd1	2×Phospho	S525; S528	2.362	0.0113024	HTP (both)
Q99PI5	Phosphatidate phosphatase LPIN2 OS=Mus musculus OX=10090 GN=Lpin2 PE=1 SV=2	26.732	Lpin2	1×Phospho [T/S/Y]	[99-116]	0.298	0.00433341	-
Q80TE7	Leucine-rich repeat-containing protein 7 OS=Mus musculus OX=10090 GN=Lrrc7 PE=1 SV=2	192.465	Lrrc7	1×Oxidation [M11]; 1×Phospho [S/T]	[1150-1167]	2.365	0.00731379	-
Q80U28	MAP kinase-activating death domain protein OS=Mus musculus OX=10090 GN=Madd PE=1 SV=2	164.753	Madd	1×Phospho [S]	[925-945]	0.01	2.10407e-16	-
				1×Phospho [S/T]	[699-729]	0.301	0.0161319	-
Q9QYR6	Microtubule-associated protein 1A OS=Mus musculus OX=10090 GN=Map1a PE=1 SV=2	1511.71	Map1a	1×Deamidated [Q]; 1×Phospho [T/S]	[1623-1647]	0.01	2.10407e-16	-
				1×Phospho	T2624	8.217	2.0887e-12	Not found in PhosphositePlus
				2×Phospho	S526; S527	4.518	3.75023e-09	HTP (both)
				2×Phospho	S1133; S1147	3.861	3.77884e-07	HTP (both)
				1×Phospho	S895	0.422	3.55777e-06	HTP
				1×Deamidated [Q]; 1×Oxidation [M18]; 2×Phospho	S1768; S1772	4.191	0.00130112	HTP (both)
				2×Phospho	S526; S527	2.087	0.00179681	HTP (both)
				1×Oxidation [M15]; 2×Phospho	S1768; S1772	2.126	0.003209	HTP (both)
				1×Deamidated [Q]; 3×Phospho	S1768; S1772; T1777	0.363	0.00415994	HTP (all)
				1×Phospho	S1634	1.904	0.00497061	HTP
				2×Phospho	T1633; S1648	2.319	0.0116622	HTP (both)
				2×Phospho	S526; S527	1.824	0.0187106	HTP (both)
				1×Oxidation [M18]; 2×Phospho	S1768; S1772	0.459	0.0215457	HTP (both)
P14873	Microtubule-associated protein 1B OS=Mus musculus OX=10090 GN=Map1b PE=1 SV=2	2110.58	Map1b	2×Deamidated [Q10; N15]; 2×Phospho [S/T]	[328-347]	0.01	2.10407e-16	-
				1×Carbamidomethyl [C19]; 1×Deamidated [Q21]; 3×Phospho [T22(100); S/T]	T905; S/T [884-914]	0.102	2.95243e-09	HTP
				1×Carbamidomethyl [C25]; 1×Deamidated [Q27]; 1×Phospho	T879	6.307	3.90739e-09	Not found in PhosphositePlus
				1×Phospho	S1395	0.502	0.00102639	HTP
				1×Deamidated [Q1]; 1×Phospho [S/T/Y]	[915-942]	2.58	0.00252913	-
				1×Phospho	S1384	0.49	0.00347409	HTP
				1×Phospho	S1013	0.567	0.00420213	HTP
				1×Oxidation [M6]; 2×Phospho	S1373; S1384	1.912	0.00715614	HTP (both)
				1×Oxidation [M9]; 3×Phospho	S825; S828; S829	2.241	0.00968848	HTP (all)
				1×Oxidation [M9]; 1×Phospho	S825	0.55	0.032157	HTP
				1×Carbamidomethyl [C19]; 1×Deamidated [Q21]; 1×Phospho [S/T]	[884-914]	0.468	0.0342717	-
				1×Deamidated [N16]; 2×Phospho [S/T]	[943-984]	0.334	0.0419275	-
				1×Oxidation [M11]; 3×Phospho	S1371; S1373; S1382	2.301	0.0462422	HTP (all)
				1×Deamidated [N/Q]; 1×Phospho	S1151	3.61	0.0472987	HTP
P20357	Microtubule-associated protein 2 OS=Mus musculus OX=10090 GN=Map2 PE=1 SV=2	1193.95	Map2	1×Oxidation [M19]; 1×Phospho	S739	6.405	9.28348e-15	HTP
				2×Phospho [S13(98.4); S/T]	S1783; S/T [1771-1793]	0.247	2.12686e-07	HTP/LTP
				1×Oxidation [M19]; 2×Phospho	S737; S739	2.982	0.000261537	HTP (both)
				1×Carbamidomethyl [C38]; 2×Oxidation [M7; M35]; 1×Phospho [S/T/Y]	[835-876]	2.063	0.00131565	-
				1×Carbamidomethyl [C38]; 1×Oxidation [M]; 1×Phospho [S/T/Y]	[835-876]	0.518	0.0382594	-
O08648	Mitogen-activated protein kinase kinase kinase 4 OS=Mus musculus OX=10090 GN=Map3k4 PE=1 SV=2	25.75	Map3k4	1×Deamidated [N14]; 1×Oxidation [M2]; 2×Phospho [S/T/Y]	[56-83]	6.372	5.68331e-05	-
P27546	Microtubule-associated protein 4 OS=Mus musculus OX=10090 GN=Map4 PE=1 SV=3	154.668	Map4	1×Phospho	S667	0.01	2.10407e-16	HTP/LTP
				1×Deamidated [N]; 1×Phospho	S667	0.01	2.10407e-16	HTP/LTP
Q7TSJ2	Microtubule-associated protein 6 OS=Mus musculus OX=10090 GN=Map6 PE=1 SV=2	188.283	Map6	1×Phospho	S905	0.152	2.10407e-16	HTP
A2AJI0	MAP7 domain-containing protein 1 OS=Mus musculus OX=10090 GN=Map7d1 PE=1 SV=1	125.605	Map7d1	1×Phospho	S460	0.245	9.04233e-07	HTP
Q9ESN9	C-Jun-amino-terminal kinase-interacting protein 3 OS=Mus musculus OX=10090 GN=Mapk8ip3 PE=1 SV=1	153.202	Mapk8ip3	1×Deamidated [N]; 2×Phospho [S10(99); S/T/Y]	S283; S/T/Y [274-304]	0.095	9.69757e-11	Not found in PhosphositePlus
				1×Oxidation [M13]; 1×Phospho	S677	2.109	0.0265875	HTP
P10637	Microtubule-associated protein tau OS=Mus musculus OX=10090 GN=Mapt PE=1 SV=3	845.943	Mapt	1×Phospho [T/S]	[186-216]	100	2.10407e-16	-
				1×Deamidated [N/Q]; 1×Oxidation [M24]; 2×Phospho [T/S]	[688-730]	11.7	2.10407e-16	-
				1×Oxidation [M24]; 1×Phospho	S714	0.245	1.43864e-08	HTP/LTP
				1×Oxidation [M24]; 3×Phospho [S14(98.5); T/S]	S701; T/S [688-730]	2.291	7.3454e-05	HTP/LTP
				1×Phospho	S494	0.435	0.000145275	HTP/LTP
				1×Phospho	S494	3.126	0.000323046	HTP/LTP
				1×Phospho	S506	0.226	0.000387881	HTP/LTP
				1×Oxidation [M13]; 2×Phospho [T8(98.8); S/T]	T706; S/T [699-730]	2.494	0.0025449	HTP/LTP
				1×Oxidation [M13]; 1×Phospho [S/T]	[699-730]	0.466	0.00377434	-
				1×Phospho	S554	0.637	0.018897	HTP/LTP
P28667	MARCKS-related protein OS=Mus musculus OX=10090 GN=Marcksl1 PE=1 SV=2	157.863	Marcksl1	2×Deamidated [N2; N17]; 1×Phospho [S/T]	[36-77]	3.592	0.00389419	-
Q8VHJ5	Serine/threonine-protein kinase MARK1 OS=Mus musculus OX=10090 GN=Mark1 PE=1 SV=2	42.908	Mark1	1×Carbamidomethyl [C17]; 1×Phospho	S382	3.866	0.00289243	HTP
Q8C525	Protein MB21D2 OS=Mus musculus OX=10090 GN=Mb21d2 PE=1 SV=1	47.153	Mb21d2	1×Phospho	S376	5.64	2.17058e-05	HTP
P04370	Myelin basic protein OS=Mus musculus OX=10090 GN=Mbp PE=1 SV=2	108.669	Mbp	1×Deamidated [N/Q]; 1×Phospho	T229	7.951	1.38579e-14	HTP/LTP
Q3UGS4	Mapk-regulated corepressor-interacting protein 1 OS=Mus musculus OX=10090 GN=Mcrip1 PE=1 SV=1	15.066	Mcrip1	1×Phospho	S21	4.458	8.31011e-05	HTP/LTP
Q8CJ19	[F-actin]-monooxygenase MICAL3 OS=Mus musculus OX=10090 GN=Mical3 PE=1 SV=2	252.112	Mical3	1×Deamidated [N/Q]; 1×Oxidation [M14]; 2×Phospho [S/T]	[1437-1471]	0.01	2.10407e-16	-
				1×Phospho	S1668	5.667	2.66463e-10	HTP
Q8BK03	Mitoguardin 2 OS=Mus musculus OX=10090 GN=Miga2 PE=1 SV=1	8.332	Miga2	1×Phospho	S116	0.397	0.0220028	HTP
Q9JM52	Misshapen-like kinase 1 OS=Mus musculus OX=10090 GN=Mink1 PE=1 SV=3	187.537	Mink1	1×Phospho	S644	0.01	2.10407e-16	HTP
				1×Deamidated [N20]; 1×Phospho [S/T]	[637-670]	0.01	2.10407e-16	-
				1×Phospho [S/T/Y]	[873-900]	100	2.10407e-16	-
				1×Deamidated [N28]; 2×Phospho [S/T/Y]	[317-353]	0.248	0.000206128	-
Q9D2P8	Myelin-associated oligodendrocyte basic protein OS=Mus musculus OX=10090 GN=Mobp PE=1 SV=1	12.493	Mobp	1×Oxidation [M4]; 1×Phospho	S98	2.358	0.047623	HTP
P59759	Myocardin-related transcription factor B OS=Mus musculus OX=10090 GN=Mrtfb PE=1 SV=1	57.283	Mrtfb	1×Deamidated [Q]; 1×Phospho [S/Y/T]	[165-205]	2.621	0.00449265	-
				1×Phospho [S/T]	[206-233]	0.307	0.0102337	-
Q6P9S0	Protein MTSS 2 OS=Mus musculus OX=10090 GN=Mtss2 PE=1 SV=1	29.065	Mtss2	1×Carbamidomethyl [C21]; 1×Phospho [T/S/Y]	[558-595]	0.498	0.0456292	-
Q61879	Myosin-10 OS=Mus musculus OX=10090 GN=Myh10 PE=1 SV=2	171.075	Myh10	1×Gln->pyro-Glu [N-Term]; 2×Phospho	S1952; S1956	1.76	0.0298227	HTP/LTP (both)
Q9JMH9	Unconventional myosin-XVIIIa OS=Mus musculus OX=10090 GN=Myo18a PE=1 SV=2	102.201	Myo18a	2×Phospho [S13(100); S/T]	S157; S/T [145-170]	0.332	0.00795599	HTP
Q99104	Unconventional myosin-Va OS=Mus musculus OX=10090 GN=Myo5a PE=1 SV=2	197.455	Myo5a	1×Phospho [S/T/Y]	[1113-1139]	100	2.10407e-16	-
				1×Deamidated [N8]; 2×Phospho [S/Y/T]	[1113-1139]	3.654	0.0460509	-
Q5SWP3	NAC-alpha domain-containing protein 1 OS=Mus musculus OX=10090 GN=Nacad PE=1 SV=1	10.852	Nacad	1×Phospho	S1268	3.268	0.00924559	HTP
Q9CWZ7	Gamma-soluble NSF attachment protein OS=Mus musculus OX=10090 GN=Napg PE=1 SV=1	149.583	Napg	1×Carbamidomethyl [C31]; 1×Deamidated [Q8]; 1×Oxidation [M17]; 1×Phospho	S284	0.228	7.11319e-10	HTP
Q9EPN1	Neurobeachin OS=Mus musculus OX=10090 GN=Nbea PE=1 SV=1	221.359	Nbea	1×Oxidation [M28]; 2×Phospho	S1001; S1004	7.922	2.05661e-06	HTP (both)
P13595	Neural cell adhesion molecule 1 OS=Mus musculus OX=10090 GN=Ncam1 PE=1 SV=3	292.489	Ncam1	1×Deamidated [N15]; 2×Phospho	T783; T788	3.837	0.00108978	Not found in PhosphositePlus (T783); HTP (T788)
O35136	Neural cell adhesion molecule 2 OS=Mus musculus OX=10090 GN=Ncam2 PE=1 SV=1	361.588	Ncam2	1×Deamidated [N]; 1×Phospho	S786	0.01	2.10407e-16	HTP
				2×Deamidated [N23; N]; 1×Oxidation [M6]; 1×Phospho	S786	0.01	2.10407e-16	HTP
				3×Deamidated [N8; N16; N19]; 1×Phospho	S786	100	2.10407e-16	HTP
				1×Deamidated [N8]; 1×Phospho	S786	100	2.10407e-16	HTP
				1×Deamidated [N]; 1×Phospho	S786	2.779	0.000648302	HTP
				2×Deamidated [N8; N16]; 1×Phospho	S786	2.474	0.0105366	HTP
				1×Oxidation [M6]; 1×Phospho [T/S]	[767-802]	2.546	0.0269877	-
				1×Phospho	S786	1.71	0.0371744	HTP
P09405	Nucleolin OS=Mus musculus OX=10090 GN=Ncl PE=1 SV=2	55.174	Ncl	2×Phospho	S145; S157	2.981	0.00786624	HTP/LTP (S145); HTP (S157)
Q9QYG0	Protein NDRG2 OS=Mus musculus OX=10090 GN=Ndrg2 PE=1 SV=1	257.945	Ndrg2	1×Carbamidomethyl [C26]; 1×Deamidated [Q6]; 1×Oxidation [M22]; 2×Phospho [S5(97.4); S/T]	S350; S/T [346-371]	8.751	2.10407e-16	HTP/LTP
				1×Carbamidomethyl [C26]; 2×Phospho [S5(100); S/T]	S350; S/T [346-371]	0.311	1.09594e-07	HTP/LTP
				3×Phospho	T330; S332; S338	2.034	0.00753484	HTP/LTP (T330 and S332); HTP (S338)
Q9QYF9	Protein NDRG3 OS=Mus musculus OX=10090 GN=Ndrg3 PE=1 SV=1	117.523	Ndrg3	1×Carbamidomethyl [C14]; 1×Phospho	S361	2.293	0.0122897	HTP
Q9CQ75	NADH dehydrogenase [ubiquinone] 1 alpha subcomplex subunit 2 OS=Mus musculus OX=10090 GN=Ndufa2 PE=1 SV=3	11.654	Ndufa2	1×Phospho	S78	2.669	0.0341474	HTP
P08553	Neurofilament medium polypeptide OS=Mus musculus OX=10090 GN=Nefm PE=1 SV=4	331.286	Nefm	2×Phospho	S715; S723	0.461	0.00354336	HTP (both)
Q7TPW1	Nexilin OS=Mus musculus OX=10090 GN=Nexn PE=1 SV=3	7.835	Nexn	1×Oxidation [M2]; 1×Phospho	S16	0.417	0.0290467	HTP
Q04690	Neurofibromin OS=Mus musculus OX=10090 GN=Nf1 PE=1 SV=1	103.256	Nf1	1×Carbamidomethyl [C12]; 1×Deamidated [N]; 1×Phospho	S2804	4.564	3.71615e-05	HTP
Q810U3	Neurofascin OS=Mus musculus OX=10090 GN=Nfasc PE=1 SV=1	470.785	Nfasc	3×Phospho	S1160; S1164; S1174	2.978	0.00120787	HTP (all)
				3×Phospho	S1187; S1190; S1207	3.677	0.00670868	HTP (all)
				1×Deamidated [N/Q]; 1×Phospho	S1187	0.478	0.0386411	HTP
Q11011	Puromycin-sensitive aminopeptidase OS=Mus musculus OX=10090 GN=Npepps PE=1 SV=2	19.206	Npepps	2×Phospho [S18(100); T/S/Y]	S919; T/S/Y [902-920]	0.01	2.10407e-16	HTP
Q810U4	Neuronal cell adhesion molecule OS=Mus musculus OX=10090 GN=Nrcam PE=1 SV=2	290.902	Nrcam	2×Deamidated [N20; N/Q]; 2×Phospho [S/Y]	[1200-1231]	100	2.10407e-16	-
P46460	Vesicle-fusing ATPase OS=Mus musculus OX=10090 GN=Nsf PE=1 SV=2	157.981	Nsf	1×Phospho	S739	0.484	0.0149659	HTP
P15209	BDNF/NT-3 growth factors receptor OS=Mus musculus OX=10090 GN=Ntrk2 PE=1 SV=1	36.252	Ntrk2	2×Phospho [T/S]; 1×Oxidation [M40]	[465-506]	3.263	0.0111569	-
Q80XU3	Nuclear ubiquitous casein and cyclin-dependent kinase substrate 1 OS=Mus musculus OX=10090 GN=Nucks1 PE=1 SV=1	138.691	Nucks1	1×Phospho	S19	0.211	2.08031e-06	HTP
O35685	Nuclear migration protein nudC OS=Mus musculus OX=10090 GN=Nudc PE=1 SV=1	168.419	Nudc	2×Deamidated [N/Q]; 2×Phospho	S136; S139	3.88	0.000486811	HTP (both)
Q9CRD0	OCIA domain-containing protein 1 OS=Mus musculus OX=10090 GN=Ociad1 PE=1 SV=1	31.576	Ociad1	1×Oxidation [M10]; 1×Phospho	S193	2.906	0.000765223	HTP
Q3B7Z2	Oxysterol-binding protein 1 OS=Mus musculus OX=10090 GN=Osbp PE=1 SV=3	268.597	Osbp	2×Oxidation [M3; M21]; 1×Phospho	S349	2.536	0.00494688	HTP
				1×Phospho [S/T]	[322-338]	2.056	0.0416074	-
B9EJ86	Oxysterol-binding protein-related protein 8 OS=Mus musculus OX=10090 GN=Osbpl8 PE=1 SV=1	37.913	Osbpl8	3×Phospho	S807; S808; S810	0.325	0.00734156	HTP (all)
Q4KMM3	Oxidation resistance protein 1 OS=Mus musculus OX=10090 GN=Oxr1 PE=1 SV=3	372.107	Oxr1	3×Phospho	S334; S336; S346	4.07	1.81482e-12	HTP (all)
				3×Phospho [S7(100); S17(100); S/T]	S336; S346; S/T [330-361]	3.03	2.18781e-08	HTP (both)
				2×Phospho	S334; S336	2.599	3.81063e-05	HTP (both)
				2×Phospho	S334; S336	2.61	0.00162357	HTP (both)
				1×Deamidated [Q30]; 2×Phospho [S5(96.7); S/T]	S334; S/T [330-361]	2.645	0.00319593	HTP
				1×Phospho	S346	2.133	0.041702	HTP
Q9CPV9	P2Y purinoceptor 12 OS=Mus musculus OX=10090 GN=P2ry12 PE=1 SV=1	7.14	P2ry12	1×Oxidation [M14]; 1×Phospho	S342	0.375	0.0014019	HTP
Q9D8I2	P2Y purinoceptor 13 OS=Mus musculus OX=10090 GN=P2yr13 PE=2 SV=2	4.095	P2yr13	2×Phospho [S/T]	[319-337]	0.191	6.67565e-06	-
Q61644	Protein kinase C and casein kinase substrate in neurons protein 1 OS=Mus musculus OX=10090 GN=Pacsin1 PE=1 SV=1	370.797	Pacsin1	3×Deamidated [N15; N20; N23]; 1×Phospho [T/S/Y]	[350-383]	17.732	2.10407e-16	-
				3×Deamidated [N31; N/Q]; 1×Phospho [T/S/Y]	[342-383]	100	2.10407e-16	-
				1×Deamidated [N]; 1×Phospho	S358	2.36	0.00795599	HTP/LTP
				1×Deamidated [N]; 1×Phospho	T352	1.729	0.0320936	Not found in PhosphositePlus
Q9WVE8	Protein kinase C and casein kinase substrate in neurons protein 2 OS=Mus musculus OX=10090 GN=Pacsin2 PE=1 SV=1	168.203	Pacsin2	3×Deamidated [N15; N23; N]; 1×Phospho [T/Y/S]	[391-432]	5.584	1.8157e-05	-
O88643	Serine/threonine-protein kinase PAK 1 OS=Mus musculus OX=10090 GN=Pak1 PE=1 SV=1	283.697	Pak1	3×Deamidated [N24; N25; N35]; 1×Phospho	S223	0.01	2.10407e-16	HTP/LTP
				1×Deamidated [N]; 1×Phospho	S223	0.232	1.00529e-05	HTP/LTP
				1×Deamidated [N]; 1×Phospho	S223	0.465	0.00705984	HTP/LTP
Q61036	Serine/threonine-protein kinase PAK 3 OS=Mus musculus OX=10090 GN=Pak3 PE=1 SV=2	73.044	Pak3	1×Phospho	S186	2.061	0.0373308	HTP
Q9Z0P4	Paralemmin-1 OS=Mus musculus OX=10090 GN=Palm PE=1 SV=1	467.083	Palm	1×Deamidated [N/Q]; 1×Oxidation [M19]; 2×Phospho	T363; S365	6.519	9.25176e-11	HTP (both)
				1×Deamidated [N/Q]; 2×Phospho	S122; S124	2.675	7.10479e-07	HTP (both)
Q8BR92	Paralemmin-2 OS=Mus musculus OX=10090 GN=Palm2 PE=1 SV=1	40.577	Palm2	2×Phospho [S29(94.1); T/S]	S348; T/S [320-366]	2.092	0.0263619	HTP
Q9QYX7	Protein piccolo OS=Mus musculus OX=10090 GN=Pclo PE=1 SV=4	1234.32	Pclo	1×Oxidation [M24]; 2×Phospho	S1766; S1772	3.371	1.02948e-09	HTP (both)	Also aligned with protein bassoon (Accession O88737)
				2×Phospho	S1766; S1772	0.331	0.000107673	HTP (both)
				1×Oxidation [M24]; 3×Phospho	T1760; S1766; S1772	3.031	0.000527526	HTP (all)
				2×Phospho [S9(99.4); S/T/Y]	S3616; S/T/Y [3608-3636]	0.385	0.00139611	HTP
				2×Phospho	S1708; S1709	2.431	0.00294725	HTP (both)
				1×Carbamidomethyl [C6]; 1×Deamidated [Q]; 1×Oxidation [M20]; 1×Phospho [T/S/Y]	[3491-3519]	3.042	0.015606	-
				2×Phospho	S1505; S1507	0.404	0.0211275	HTP (both)
Q01065	Calcium/calmodulin-dependent 3',5'-cyclic nucleotide phosphodiesterase 1B OS=Mus musculus OX=10090 GN=Pde1b PE=1 SV=2	34.869	Pde1b	1×Carbamidomethyl [C17]; 2×Deamidated [N/Q]; 1×Phospho [S/T]; 1×Oxidation [M9]	[499-535]	100	2.10407e-16	-
Q01063	cAMP-specific 3',5'-cyclic phosphodiesterase 4D OS=Mus musculus OX=10090 GN=Pde4d PE=1 SV=2	60.594	Pde4d	2×Phospho [S14(100); S/Y]	S141; S/Y [128-143]	3.809	1.75499e-05	HTP/LTP
P35486	Pyruvate dehydrogenase E1 component subunit alpha, somatic form, mitochondrial OS=Mus musculus OX=10090 GN=Pdha1 PE=1 SV=1	45.154	Pdha1	1×Oxidation [M6]; 1×Phospho	S293	2.316	0.000157743	HTP/LTP
D3YZI9	PiggyBac transposable element-derived protein 5 OS=Mus musculus OX=10090 GN=Pgbd5 PE=1 SV=1	10.054	Pgbd5	1×Phospho	S520	1.939	0.00631237	HTP
P09411	Phosphoglycerate kinase 1 OS=Mus musculus OX=10090 GN=Pgk1 PE=1 SV=4	82.68	Pgk1	1×Phospho	S203	0.15	5.03981e-06	HTP/LTP
Q80UU9	Membrane-associated progesterone receptor component 2 OS=Mus musculus OX=10090 GN=Pgrmc2 PE=1 SV=2	75.618	Pgrmc2	1×Phospho	T205	0.01	2.10407e-16	HTP
O35954	Membrane-associated phosphatidylinositol transfer protein 1 OS=Mus musculus OX=10090 GN=Pitpnm1 PE=1 SV=1	88.642	Pitpnm1	1×Phospho	S373	0.29	0.000124567	HTP
Q6ZPQ6	Membrane-associated phosphatidylinositol transfer protein 2 OS=Mus musculus OX=10090 GN=Pitpnm2 PE=1 SV=2	96.719	Pitpnm2	1×Carbamidomethyl [C25]; 2×Phospho	S334; S338	0.442	0.00339522	HTP (both)
Q80U04	E3 ubiquitin-protein ligase Praja-2 OS=Mus musculus OX=10090 GN=Pja2 PE=1 SV=2	4.334	Pja2	1×Phospho [S/T]	[74-97]	0.01	2.10407e-16	-
Q68FH0	Plakophilin-4 OS=Mus musculus OX=10090 GN=Pkp4 PE=1 SV=1	178.718	Pkp4	1×Deamidated [N/Q]; 2×Phospho	S421; S426	3.556	8.91544e-05	HTP (both)
				2×Phospho	S1185; S1188	2.505	0.00861161	HTP (both)
Q9Z1B3	1-phosphatidylinositol 4,5-bisphosphate phosphodiesterase beta-1 OS=Mus musculus OX=10090 GN=Plcb1 PE=1 SV=2	508.037	Plcb1	1×Carbamidomethyl [C39]; 2×Phospho	T509; S511	3.427	0.0144248	HTP (both)
				1×Carbamidomethyl [C40]; 2×Phospho	T509; S511	2.556	0.026766	HTP (both)
Q8R3B1	1-phosphatidylinositol 4,5-bisphosphate phosphodiesterase delta-1 OS=Mus musculus OX=10090 GN=Plcd1 PE=1 SV=2	39.573	Plcd1	1×Deamidated [N12]; 1×Oxidation [M28]; 1×Phospho [T/S]	[441-474]	100	2.10407e-16	-
A2AP18	1-phosphatidylinositol 4,5-bisphosphate phosphodiesterase eta-2 OS=Mus musculus OX=10090 GN=Plch2 PE=1 SV=2	127.451	Plch2	1×Carbamidomethyl [C28]; 1×Oxidation [M24]; 2×Phospho	S561; S565	1.815	0.0189433	HTP (both)
Q7TME0	2-lysophosphatidate phosphatase PLPPR4 OS=Mus musculus OX=10090 GN=Plppr4 PE=1 SV=2	67.607	Plppr4	1×Phospho	S549	0.071	2.10407e-16	HTP
Q8BSS9	Liprin-alpha-2 OS=Mus musculus OX=10090 GN=Ppfia2 PE=1 SV=2	83.913	Ppfia2	2×Oxidation [M1; M16]; 1×Phospho [S/T]	[230-250]	3.086	0.0222824	-
Q9DCL8	Protein phosphatase inhibitor 2 OS=Mus musculus OX=10090 GN=Ppp1r2 PE=1 SV=3	142.521	Ppp1r2	1×Deamidated [N]; 1×Phospho; 2×Oxidation [M11; M28]	T74	5.618	1.34507e-07	HTP/LTP
				1×Deamidated [N]; 1×Oxidation [M]; 1×Phospho [T/Y/S]	[69-103]	0.21	5.33494e-05	-
P63328	Serine/threonine-protein phosphatase 2B catalytic subunit alpha isoform OS=Mus musculus OX=10090 GN=Ppp3ca PE=1 SV=1	150.815	Ppp3ca	1×Carbamidomethyl [C12]; 1×Deamidated [N]; 1×Oxidation [M4]; 1×Phospho [T/S]	[361-392]	100	2.10407e-16	-
P48453	Serine/threonine-protein phosphatase 2B catalytic subunit beta isoform OS=Mus musculus OX=10090 GN=Ppp3cb PE=1 SV=2	11.969	Ppp3cb	1×Carbamidomethyl [C9]; 1×Phospho	S479	0.493	0.0403156	HTP
Q571I4	Inactive tyrosine-protein kinase PRAG1 OS=Mus musculus OX=10090 GN=Prag1 PE=1 SV=3	9.007	Prag1	1×Carbamidomethyl [C17]; 1×Phospho [S]	[308-328]	100	2.10407e-16	-
Q3U5C7	Prickle-like protein 1 OS=Mus musculus OX=10090 GN=Prickle1 PE=1 SV=1	26.774	Prickle1	1×Phospho	S433	100	2.10407e-16	Not found in PhosphositePlus
Q80Y24	Prickle-like protein 2 OS=Mus musculus OX=10090 GN=Prickle2 PE=1 SV=3	95.042	Prickle2	1×Phospho [S]	[694-706]	2.759	0.0267337	-
Q6PAM0	5'-AMP-activated protein kinase subunit beta-2 OS=Mus musculus OX=10090 GN=Prkab2 PE=1 SV=1	46.697	Prkab2	1×Phospho	S107	0.01	2.10407e-16	HTP
P05132	cAMP-dependent protein kinase catalytic subunit alpha OS=Mus musculus OX=10090 GN=Prkaca PE=1 SV=3	36.495	Prkaca	1×Carbamidomethyl [C7]; 1×Phospho [T/Y/S]	[194-214]	0.394	0.0367867	-
P31324	cAMP-dependent protein kinase type II-beta regulatory subunit OS=Mus musculus OX=10090 GN=Prkar2b PE=1 SV=3	350.113	Prkar2b	2×Deamidated [N15; N]; 1×Phospho [S]	[73-106]	3.996	2.34749e-06	-
				1×Deamidated [N]; 1×Oxidation [M9]; 2×Phospho	S83; S85	2.385	2.35903e-05	HTP (both)
				1×Oxidation [M9]; 1×Phospho [S]	[73-106]	2.702	0.00126253	-
				1×Oxidation [M9]; 2×Phospho	S83; S85	2.453	0.00313522	HTP (both)
				1×Deamidated [N]; 1×Phospho [S]	[73-106]	0.44	0.00694924	-
				1×Carbamidomethyl [C4]; 1×Phospho	S112	3.16	0.0166519	HTP/LTP
P20444	Protein kinase C alpha type OS=Mus musculus OX=10090 GN=Prkca PE=1 SV=3	72.626	Prkca	1×Phospho	S319	2.943	0.0127922	HTP
P68404	Protein kinase C beta type OS=Mus musculus OX=10090 GN=Prkcb PE=1 SV=4	100.778	Prkcb	1×Met-loss+Acetyl [N-Term]; 1×Phospho	S11	0.475	0.00587046	HTP
P16054	Protein kinase C epsilon type OS=Mus musculus OX=10090 GN=Prkce PE=1 SV=1	197.567	Prkce	1×Phospho	S368	2.674	0.00209356	HTP/LTP
P63318	Protein kinase C gamma type OS=Mus musculus OX=10090 GN=Prkcg PE=1 SV=1	232.239	Prkcg	1×Oxidation [M1]; 3×Phospho	S326; S328; S330	2.261	0.00127301	HTP (all)
Q7TSC1	Protein PRRC2A OS=Mus musculus OX=10090 GN=Prrc2a PE=1 SV=1	116.413	Prrc2a	1×Phospho	S1302	0.01	2.10407e-16	HTP
E9PUL5	Proline-rich transmembrane protein 2 OS=Mus musculus OX=10090 GN=Prrt2 PE=1 SV=1	500.088	Prrt2	1×Deamidated [N/Q]; 1×Phospho	T214	0.329	9.46895e-11	HTP
				1×Phospho [S/T]	[65-107]	2.024	0.0069463	-
P34152	Focal adhesion kinase 1 OS=Mus musculus OX=10090 GN=Ptk2 PE=1 SV=4	43.564	Ptk2	1×Deamidated [N18]; 1×Phospho	S910	100	2.10407e-16	HTP/LTP
P80560	Receptor-type tyrosine-protein phosphatase N2 OS=Mus musculus OX=10090 GN=Ptprn2 PE=1 SV=2	106.383	Ptprn2	1×Phospho	S339	1.837	0.0134276	HTP
Q9EPB4	Apoptosis-associated speck-like protein containing a CARD OS=Mus musculus OX=10090 GN=Pycard PE=1 SV=1	12.148	Pycard	1×Phospho	S193	0.411	0.0453062	HTP
P46638	Ras-related protein Rab-11B OS=Mus musculus OX=10090 GN=Rab11b PE=1 SV=3	119.02	Rab11b	1×Deamidated [N/Q]; 1×Phospho	S190	2.509	0.00341161	HTP
Q99KL7	Ras-related protein Rab-28 OS=Mus musculus OX=10090 GN=Rab28 PE=1 SV=1	6.686	Rab28	1×Met-loss+Acetyl [N-Term]; 1×Phospho	S2	0.562	0.0149556	HTP
A2AWA9	Rab GTPase-activating protein 1 OS=Mus musculus OX=10090 GN=Rabgap1 PE=1 SV=1	74.467	Rabgap1	1×Deamidated [N/Q]; 1×Oxidation [M10]; 1×Phospho	S503	0.167	3.51625e-06	HTP
				1×Oxidation [M18]; 1×Phospho [T/S]	[483-526]	0.314	0.0188929	-
Q5U3K5	Rab-like protein 6 OS=Mus musculus OX=10090 GN=Rabl6 PE=1 SV=2	241.144	Rabl6	2×Phospho	S594; T597	2.51	0.00496295	HTP (both)
				1×Deamidated [N/Q]; 1×Oxidation [M19]; 2×Phospho	S436; S438	2.232	0.022997	HTP (both)
P34022	Ran-specific GTPase-activating protein OS=Mus musculus OX=10090 GN=Ranbp1 PE=1 SV=2	29.79	Ranbp1	1×Deamidated [N/Q]; 1×Phospho	S21	2.675	0.0364909	HTP
Q8BRJ3	RELT-like protein 2 OS=Mus musculus OX=10090 GN=Rell2 PE=1 SV=1	36.296	Rell2	1×Phospho [T/S]	[48-74]	2.977	0.00020302	-
Q80XA6	RalBP1-associated Eps domain-containing protein 2 OS=Mus musculus OX=10090 GN=Reps2 PE=1 SV=2	26.693	Reps2	1×Deamidated [N/Q]; 1×Phospho	S245	100	2.10407e-16	HTP
O54829	Regulator of G-protein signaling 7 OS=Mus musculus OX=10090 GN=Rgs7 PE=1 SV=2	72.506	Rgs7	1×Phospho	S241	0.554	0.0351522	HTP
Q80U40	RIMS-binding protein 2 OS=Mus musculus OX=10090 GN=Rimbp2 PE=1 SV=3	90.753	Rimbp2	1×Deamidated [N/Q]; 1×Phospho [S/Y/T]	[706-732]	4.116	0.000762862	-
				1×Deamidated [N/Q]; 1×Phospho	S728	2.74	0.00139611	HTP
Q99NE5	Regulating synaptic membrane exocytosis protein 1 OS=Mus musculus OX=10090 GN=Rims1 PE=1 SV=2	401.283	Rims1	1×Deamidated [Q9]; 2×Phospho	S1023; T1025	4.424	6.89341e-08	HTP (both)
Q9D0L8	mRNA cap guanine-N7 methyltransferase OS=Mus musculus OX=10090 GN=Rnmt PE=1 SV=1	107.37	Rnmt	1×Phospho	S100	2.749	0.0240935	HTP
P47708	Rabphilin-3A OS=Mus musculus OX=10090 GN=Rph3a PE=1 SV=2	100.161	Rph3a	1×Phospho	S680	0.427	0.00117209	HTP
				1×Deamidated [N/Q]; 1×Phospho	S680	1.739	0.0291034	HTP
Q8K0T0	Reticulon-1 OS=Mus musculus OX=10090 GN=Rtn1 PE=1 SV=1	75.755	Rtn1	1×Carbamidomethyl [C4]; 1×Phospho [S/T]	[304-348]	3.667	0.00587046	-
Q9ES97	Reticulon-3 OS=Mus musculus OX=10090 GN=Rtn3 PE=1 SV=2	505.686	Rtn3	1×Deamidated [N5]; 1×Oxidation [M8]; 1×Phospho [S/T]	[452-492]	100	2.10407e-16	-
				1×Deamidated [N5]; 1×Oxidation [M8]; 2×Phospho [S/T]	[452-492]	12.261	2.10407e-16	-
				1×Carbamidomethyl [C13]; 1×Deamidated [N/Q]; 1×Oxidation [M12]; 1×Phospho	T524	0.274	0.00284972	HTP
Q99P72	Reticulon-4 OS=Mus musculus OX=10090 GN=Rtn4 PE=1 SV=2	541.723	Rtn4	1×Carbamidomethyl [C6]; 2×Oxidation [M39; M41]; 2×Phospho	S716; S717	2.677	2.93815e-05	HTP (both)
				3×Phospho [S27(99.2); S/T]	S857; 2x Phospho S/T [831-859]	2.69	0.000993195	HTP
				1×Phospho	S165	0.434	0.00895584	HTP
				2×Phospho	S832; S857	1.75	0.0290467	HTP (both)
				1×Acetyl [N-Term]; 1×Phospho	S16	0.434	0.0296572	HTP/LTP
				1×Deamidated [N18]; 1×Oxidation [M13]; 1×Phospho	S291	2.731	0.0377699	HTP
P59808	SAM and SH3 domain-containing protein 1 OS=Mus musculus OX=10090 GN=Sash1 PE=1 SV=1	38.712	Sash1	1×Deamidated [N/Q]; 1×Phospho	S692	100	2.10407e-16	HTP
Q6ZPE2	Myotubularin-related protein 5 OS=Mus musculus OX=10090 GN=Sbf1 PE=1 SV=2	90.393	Sbf1	1×Phospho	S706	2.241	0.00222945	HTP
				1×Phospho [S/T/Y]	[696-732]	3.049	0.0226833	-
O35609	Secretory carrier-associated membrane protein 3 OS=Mus musculus OX=10090 GN=Scamp3 PE=1 SV=3	22.259	Scamp3	1×Phospho	S78	0.01	2.10407e-16	HTP
Q03517	Secretogranin-2 OS=Mus musculus OX=10090 GN=Scg2 PE=1 SV=1	90.989	Scg2	1×Phospho	S556	0.01	2.10407e-16	HTP
				1×Oxidation [M11]; 1×Phospho [S]	[549-564]	0.364	0.0425916	-
Q3UPL0	Protein transport protein Sec31A OS=Mus musculus OX=10090 GN=Sec31a PE=1 SV=2	144.305	Sec31a	1×Deamidated [Q]; 2×Phospho	S526; S531	12.273	2.10407e-16	HTP (both)
				2×Phospho	S526; S531	1.984	0.00257394	HTP (both)
				1×Deamidated [Q]; 1×Phospho	S531	3.537	0.00869081	HTP
Q9Z123	Semaphorin-4F OS=Mus musculus OX=10090 GN=Sema4f PE=1 SV=2	16.391	Sema4f	1×Deamidated [Q17]; 2×Phospho	S725; S727	2.386	0.0276321	HTP (both)
P42208	Septin-2 OS=Mus musculus OX=10090 GN=Septin2 PE=1 SV=2	69.762	Septin2	1×Phospho	S218	1.691	0.0443788	HTP/LTP
Q9Z2Q6	Septin-5 OS=Mus musculus OX=10090 GN=Septin5 PE=1 SV=2	138.666	Septin5	1×Carbamidomethyl [C11]; 1×Phospho	S225	0.31	0.00517099	HTP
O55131	Septin-7 OS=Mus musculus OX=10090 GN=Septin7 PE=1 SV=1	115.943	Septin7	1×Oxidation [M6]; 1×Phospho	S333	0.144	1.23528e-13	HTP
				1×Phospho	S333	0.281	0.00166582	HTP
Q64213	Splicing factor 1 OS=Mus musculus OX=10090 GN=Sf1 PE=1 SV=6	29.997	Sf1	2×Phospho	S80; S82	0.414	0.00846234	HTP/LTP (both)
Q8VD37	SH3-containing GRB2-like protein 3-interacting protein 1 OS=Mus musculus OX=10090 GN=Sgip1 PE=1 SV=1	364.166	Sgip1	1×Oxidation [M17]; 2×Phospho [T34(100); S/T]	T247; S/T [214-254]	0.465	0.000207046	HTP
				1×Phospho	S287	0.256	0.000308768	HTP
Q8R550	SH3 domain-containing kinase-binding protein 1 OS=Mus musculus OX=10090 GN=Sh3kbp1 PE=1 SV=1	44.783	Sh3kbp1	1×Phospho	S218	3.536	0.00259533	Not found in PhosphositePlus
D3YZU1	SH3 and multiple ankyrin repeat domains protein 1 OS=Mus musculus OX=10090 GN=Shank1 PE=1 SV=1	140.973	Shank1	2×Phospho	S638; S641	2.601	0.00308887	HTP (both)
				1×Oxidation [M6]; 1×Phospho	S1291	0.427	0.012763	HTP
				1×Phospho	S413	2.252	0.022997	HTP
Q8C0T5	Signal-induced proliferation-associated 1-like protein 1 OS=Mus musculus OX=10090 GN=Sipa1l1 PE=1 SV=2	154.908	Sipa1l1	1×Oxidation [M19]; 1×Phospho	S114	3.227	0.0147377	Not found in PhosphositePlus
A2AQ25	Sickle tail protein OS=Mus musculus OX=10090 GN=Skt PE=1 SV=1	234.809	Skt	1×Phospho	S1647	3.093	0.0305479	HTP
P51906	Excitatory amino acid transporter 3 OS=Mus musculus OX=10090 GN=Slc1a1 PE=1 SV=2	57.242	Slc1a1	1×Oxidation [M5]; 1×Phospho	S475	4.613	2.34271e-08	HTP
				1×Deamidated [N12]; 1×Phospho [S/T]	[468-500]	0.274	0.00320228	-
P43006	Excitatory amino acid transporter 2 OS=Mus musculus OX=10090 GN=Slc1a2 PE=1 SV=1	613.419	Slc1a2	2×Carbamidomethyl [C7; C20]; 3×Deamidated [N5; N13; N/Q]; 1×Phospho	S530	100	2.10407e-16	HTP
				2×Carbamidomethyl [C18; C31]; 3×Deamidated [N/Q]; 1×Phospho [S/T/Y]	[518-549]	0.236	1.95311e-05	-
				2×Carbamidomethyl [C10; C23]; 2×Deamidated [N/Q]; 1×Phospho	S530	0.476	6.68672e-05	HTP
				2×Carbamidomethyl [C10; C23]; 2×Deamidated [N/Q]; 2×Phospho	S530; S532	0.396	0.0391568	HTP
O35633	Vesicular inhibitory amino acid transporter OS=Mus musculus OX=10090 GN=Slc32a1 PE=1 SV=3	79.439	Slc32a1	1×Carbamidomethyl [C6]; 1×Phospho	S97	0.201	3.41564e-11	HTP
Q5DTL9	Sodium-driven chloride bicarbonate exchanger OS=Mus musculus OX=10090 GN=Slc4a10 PE=1 SV=2	126.791	Slc4a10	1×Phospho	S89	2.104	0.000632799	HTP
				1×Deamidated [Q18]; 1×Phospho	S89	2.432	0.0437505	HTP
O88343	Electrogenic sodium bicarbonate cotransporter 1 OS=Mus musculus OX=10090 GN=Slc4a4 PE=1 SV=2	255.267	Slc4a4	1×Carbamidomethyl [C13]; 1×Phospho	S1029	3.228	0.00340034	HTP/LTP
Q8BJI1	Sodium-dependent neutral amino acid transporter SLC6A17 OS=Mus musculus OX=10090 GN=Slc6a17 PE=1 SV=1	179.908	Slc6a17	2×Deamidated [N]; 1×Phospho	S693	0.01	2.10407e-16	Not found in PhosphositePlus
				1×Phospho	S701	0.358	0.00016927	HTP
Q9QXW9	Large neutral amino acids transporter small subunit 2 OS=Mus musculus OX=10090 GN=Slc7a8 PE=1 SV=1	162.526	Slc7a8	3×Phospho [S14(100); S15(100); S/T]	S27; S28; S/T [14-37]	0.01	2.10407e-16	HTP (both)
Q8K596	Sodium/calcium exchanger 2 OS=Mus musculus OX=10090 GN=Slc8a2 PE=1 SV=1	164.057	Slc8a2	1×Deamidated [N12]; 1×Phospho	S622	0.205	1.95355e-05	HTP
Q61165	Sodium/hydrogen exchanger 1 OS=Mus musculus OX=10090 GN=Slc9a1 PE=1 SV=1	118.499	Slc9a1	1×Carbamidomethyl [C1]; 1×Phospho	S801	3.81	0.00342456	HTP/LTP
Q3URD3	Sarcolemmal membrane-associated protein OS=Mus musculus OX=10090 GN=Slmap PE=1 SV=2	48.528	Slmap	1×Oxidation [M12]; 2×Phospho [S/T]	[473-495]	3.511	0.000568918	-
Q9R0P4	Small acidic protein OS=Mus musculus OX=10090 GN=Smap PE=1 SV=1	53.284	Smap	1×Phospho	S17	0.084	5.12897e-13	HTP
E9Q942	Small integral membrane protein 13 OS=Mus musculus OX=10090 GN=Smim13 PE=1 SV=1	108.777	Smim13	1×Deamidated [N/Q]; 2×Phospho	S59; S61	4.675	0.00568458	HTP (both)
Q9JJY3	Sphingomyelin phosphodiesterase 3 OS=Mus musculus OX=10090 GN=Smpd3 PE=1 SV=1	54.643	Smpd3	1×Deamidated [N8]; 1×Phospho [S/T/Y]	[169-197]	0.388	0.0490043	-
O55042	Alpha-synuclein OS=Mus musculus OX=10090 GN=Snca PE=1 SV=2	89.933	Snca	1×Deamidated [Q]; 2×Oxidation [M14; M25]; 1×Phospho [S/Y]	[103-140]	3.628	0.00185033	-
				2×Oxidation [M14; M25]; 1×Phospho [S/Y]	[103-140]	0.262	0.00254796	-
Q80U23	Syntaphilin OS=Mus musculus OX=10090 GN=Snph PE=1 SV=3	54.165	Snph	1×Phospho	S204	0.262	6.71749e-08	HTP
Q91WE1	Sorting nexin-15 OS=Mus musculus OX=10090 GN=Snx15 PE=1 SV=1	6.611	Snx15	1×Phospho	S227	100	2.10407e-16	HTP
Q80ZX8	Sperm-associated antigen 1 OS=Mus musculus OX=10090 GN=Spag1 PE=1 SV=1	8.922	Spag1	1×Deamidated [Q4]; 2×Phospho [S24(97.8); S/T]	S754; S/T [731-758]	100	2.10407e-16	Not found in PhosphositePlus
Q924S8	Sprouty-related, EVH1 domain-containing protein 1 OS=Mus musculus OX=10090 GN=Spred1 PE=1 SV=1	3.704	Spred1	1×Phospho	S239	3.489	0.00768352	HTP
Q62261	Spectrin beta chain, non-erythrocytic 1 OS=Mus musculus OX=10090 GN=Sptbn1 PE=1 SV=2	484.721	Sptbn1	2×Deamidated [N/Q]; 1×Phospho	S2137	13.094	2.10407e-16	HTP
				3×Phospho	S2160; S2164; S2168	2.238	0.00877268	HTP (all)
				1×Deamidated [N/Q]; 1×Oxidation [M]; 1×Phospho [T/S]	[2140-2161]	0.622	0.0331788	-
Q9QWI6	SRC kinase signaling inhibitor 1 OS=Mus musculus OX=10090 GN=Srcin1 PE=1 SV=2	359.407	Srcin1	1×Phospho	S574	0.146	3.63462e-06	HTP
				1×Phospho	S933	0.315	3.55521e-05	HTP
				2×Phospho	S407; S411	2.646	0.00224368	HTP (both)
				1×Phospho	S293	1.868	0.0242953	HTP
				1×Phospho	S1054	0.403	0.044849	HTP
Q91Z67	SLIT-ROBO Rho GTPase-activating protein 2 OS=Mus musculus OX=10090 GN=Srgap2 PE=1 SV=2	21.548	Srgap2	2×Carbamidomethyl [C8; C36]; 1×Phospho [T/S/Y]	[693-736]	0.01	2.10407e-16	-
O70551	SRSF protein kinase 1 OS=Mus musculus OX=10090 GN=Srpk1 PE=1 SV=2	41.244	Srpk1	1×Carbamidomethyl [C32]; 1×Deamidated [N/Q]; 1×Phospho	S51	100	2.10407e-16	HTP/LTP
O54781	SRSF protein kinase 2 OS=Mus musculus OX=10090 GN=Srpk2 PE=1 SV=2	153.138	Srpk2	1×Phospho	S378	2.57	0.00325562	HTP
P58404	Striatin-4 OS=Mus musculus OX=10090 GN=Strn4 PE=1 SV=2	98.488	Strn4	1×Carbamidomethyl [C15]; 1×Deamidated [N/Q]; 1×Phospho	S276	3.822	0.00184221	HTP
				1×Deamidated [N20]; 1×Oxidation [M6]; 1×Phospho	S312	3.754	0.0042403	HTP
O35526	Syntaxin-1A OS=Mus musculus OX=10090 GN=Stx1a PE=1 SV=3	140.077	Stx1a	1×Phospho	S14	2.296	0.00497061	HTP/LTP
Q8K400	Syntaxin-binding protein 5 OS=Mus musculus OX=10090 GN=Stxbp5 PE=1 SV=3	171.223	Stxbp5	1×Phospho	S760	0.305	0.00462536	HTP
Q9JIS5	Synaptic vesicle glycoprotein 2A OS=Mus musculus OX=10090 GN=Sv2a PE=1 SV=1	137.26	Sv2a	1×Phospho [S/T/Y]	[68-103]	1.998	0.0445064	-
Q8BG39	Synaptic vesicle glycoprotein 2B OS=Mus musculus OX=10090 GN=Sv2b PE=1 SV=1	263.545	Sv2b	2×Deamidated [N/Q]; 1×Phospho [S/T/Y]	[22-60]	16.264	2.10407e-16	-
				1×Deamidated [N/Q]; 1×Phospho	S33	2.479	1.10923e-05	HTP
Q8BFT9	Synaptic vesicle 2-related protein OS=Mus musculus OX=10090 GN=Svop PE=1 SV=1	46.584	Svop	2×Phospho	S25; S31	2.388	0.00917744	HTP (both)
				1×Phospho	S31	2.223	0.0207888	HTP
O88935	Synapsin-1 OS=Mus musculus OX=10090 GN=Syn1 PE=1 SV=2	497.832	Syn1	2×Phospho	S62; S67	0.2	8.61055e-11	HTP/LTP (both)
				1×Phospho	S67	0.283	9.58546e-07	HTP/LTP
				1×Phospho	S666	0.49	0.000666394	HTP
				2×Oxidation [M7; M13]; 1×Phospho	T339	3.027	0.0157615	HTP/LTP	Also aligned with Syn2 (Accession Q64332)
Q64332	Synapsin-2 OS=Mus musculus OX=10090 GN=Syn2 PE=1 SV=2	153.279	Syn2	1×Phospho	S546	0.197	0.000482332	HTP/LTP
				2×Oxidation [M7; M13]; 1×Phospho	T340	3.027	0.0157615	Not found in PhosphositePlus	Also aligned with Syn1 (Accession O88935)
				1×Phospho	S426	0.578	0.0369941	HTP/LTP
Q6ZWR6	Nesprin-1 OS=Mus musculus OX=10090 GN=Syne1 PE=1 SV=2	28.947	Syne1	2×Carbamidomethyl [C1; C27]; 1×Phospho	S5884	3.456	0.0032751	Not found in PhosphositePlus
F6SEU4	Ras/Rap GTPase-activating protein SynGAP OS=Mus musculus OX=10090 GN=Syngap1 PE=1 SV=2	197.043	Syngap1	1×Gln->pyro-Glu [N-Term]; 1×Oxidation [M4]; 1×Phospho	S117	0.01	2.10407e-16	HTP
				1×Oxidation [M4]; 1×Phospho [S]	[840-854]	100	2.10407e-16	-
				1×Phospho	S1222	4.081	4.37205e-07	HTP
				1×Oxidation [M12]; 1×Phospho [S]	[762-775]	8.857	1.34106e-06	-
				1×Oxidation [M13]; 1×Phospho [S/T]	[1133-1150]	4.26	0.000109528	-
Q62277	Synaptophysin OS=Mus musculus OX=10090 GN=Syp PE=1 SV=2	18.8	Syp	2×Carbamidomethyl [C5; C12]; 2×Oxidation [M2; M4]; 1×Phospho	T187	0.563	0.0483802	HTP
P46096	Synaptotagmin-1 OS=Mus musculus OX=10090 GN=Syt1 PE=1 SV=1	178.007	Syt1	1×Phospho	T128	0.544	0.00179841	HTP/LTP
				1×Phospho [S/T/Y]	[333-354]	0.371	0.0489509	-
P58802	TBC1 domain family member 10A OS=Mus musculus OX=10090 GN=Tbc1d10a PE=1 SV=1	29.681	Tbc1d10a	2×Deamidated [Q5; N25]; 2×Phospho [S20(100); S/T]	S43; S/T [24-53]	100	2.10407e-16	HTP
Q8R0A5	Transcription elongation factor A protein-like 3 OS=Mus musculus OX=10090 GN=Tceal3 PE=1 SV=2	38.478	Tceal3	1×Phospho	S30	0.471	0.00266389	HTP
P39447	Tight junction protein ZO-1 OS=Mus musculus OX=10090 GN=Tjp1 PE=1 SV=2	88.76	Tjp1	1×Deamidated [N16]; 2×Phospho	S125; S131	3.253	0.000134275	HTP (both)
				1×Phospho	T868	3.16	0.0272199	HTP
Q8R138	Transmembrane protein 119 OS=Mus musculus OX=10090 GN=Tmem119 PE=1 SV=1	10.485	Tmem119	1×Carbamidomethyl [C23]; 1×Phospho	S199	0.367	0.002176	HTP
Q8C0L0	Thioredoxin-related transmembrane protein 4 OS=Mus musculus OX=10090 GN=Tmx4 PE=1 SV=2	58.03	Tmx4	1×Carbamidomethyl [C1]; 1×Deamidated [Q]; 1×Phospho	S247	4.812	0.00017423	HTP
P83510	Traf2 and NCK-interacting protein kinase OS=Mus musculus OX=10090 GN=Tnik PE=1 SV=2	252.315	Tnik	1×Gln->pyro-Glu [N-Term]; 1×Phospho	S611	2.085	0.0048727	HTP
Q5SRX1	TOM1-like protein 2 OS=Mus musculus OX=10090 GN=Tom1l2 PE=1 SV=1	56.704	Tom1l2	1×Deamidated [N21]; 1×Phospho	S479	0.315	0.0031483	HTP
Q7TQD2	Tubulin polymerization-promoting protein OS=Mus musculus OX=10090 GN=Tppp PE=1 SV=1	160.026	Tppp	2×Phospho	S31; S34	0.412	0.00351981	HTP/LTP (S31); HTP (S34)
G5E870	E3 ubiquitin-protein ligase TRIP12 OS=Mus musculus OX=10090 GN=Trip12 PE=1 SV=1	19.069	Trip12	2×Phospho	S1350; S1355	3.427	0.0120808	HTP (both)
Q3UVR3	Tau-tubulin kinase 2 OS=Mus musculus OX=10090 GN=Ttbk2 PE=1 SV=1	14.053	Ttbk2	1×Phospho [T/S]	[574-597]	0.01	2.10407e-16	-
E9Q6P5	Tetratricopeptide repeat protein 7B OS=Mus musculus OX=10090 GN=Ttc7b PE=1 SV=1	56.878	Ttc7b	2×Phospho	S677; S678	2.417	0.000366147	HTP (both)
Q9D3A9	Protein tweety homolog 1 OS=Mus musculus OX=10090 GN=Ttyh1 PE=1 SV=1	21.097	Ttyh1	1×Phospho	S449	0.357	0.0480366	HTP
P68369	Tubulin alpha-1A chain OS=Mus musculus OX=10090 GN=Tuba1a PE=1 SV=1	250.399	Tuba1a	1×Carbamidomethyl [C15]; 1×Oxidation [M22]; 1×Phospho	S287	0.01	2.10407e-16	HTP	Also aligned with Tuba4a (Accession P68368)
P68368	Tubulin alpha-4A chain OS=Mus musculus OX=10090 GN=Tuba4a PE=1 SV=1	205.14	Tuba4a	1×Carbamidomethyl [C15]; 1×Oxidation [M22]; 1×Phospho	S287	0.01	2.10407e-16	HTP	Also aligned with Tuba1a (Accession P68369)
Q6ZPJ3	(E3-independent) E2 ubiquitin-conjugating enzyme UBE2O OS=Mus musculus OX=10090 GN=Ube2o PE=1 SV=3	253.38	Ube2o	1×Carbamidomethyl [C35]; 1×Deamidated [Q]; 2×Phospho [S7(99.2); S/T]; 1×Oxidation [M23]	S424; S/T [418-461]	3.994	5.35437e-07	Not found in PhosphositePlus
				2×Oxidation [M8; M26]; 1×Phospho	S1196	3.202	0.00280548	HTP
				1×Carbamidomethyl [C35]; 1×Phospho [S/T]	[418-461]	0.468	0.00338944	-
				1×Carbamidomethyl [C35]; 1×Deamidated [Q]; 1×Oxidation [M23]; 1×Phospho	S420	2.464	0.0445119	Not found in PhosphositePlus
P70398	Probable ubiquitin carboxyl-terminal hydrolase FAF-X OS=Mus musculus OX=10090 GN=Usp9x PE=1 SV=2	79.835	Usp9x	1×Deamidated [N4]; 1×Phospho	S2547	0.329	0.0116465	HTP/LTP
O70480	Vesicle-associated membrane protein 4 OS=Mus musculus OX=10090 GN=Vamp4 PE=1 SV=1	59.811	Vamp4	1×Phospho	S30	0.01	2.10407e-16	HTP/LTP
Q9EQH3	Vacuolar protein sorting-associated protein 35 OS=Mus musculus OX=10090 GN=Vps35 PE=1 SV=1	45.541	Vps35	1×Phospho	S783	0.527	0.0218159	HTP
Q6PGL7	WASH complex subunit 2 OS=Mus musculus OX=10090 GN=Washc2 PE=1 SV=1	114.806	Washc2	2×Phospho	S613; S614	2.08	0.0409486	HTP (both)
Q91YD9	Neural Wiskott-Aldrich syndrome protein OS=Mus musculus OX=10090 GN=Wasl PE=1 SV=1	21.212	Wasl	2×Phospho	S480; S481	3.093	0.00812737	HTP/LTP (both)
Q6NVE8	WD repeat-containing protein 44 OS=Mus musculus OX=10090 GN=Wdr44 PE=1 SV=1	128.106	Wdr44	1×Phospho	S405	0.295	0.000714987	HTP
Q920I9	WD repeat-containing protein 7 OS=Mus musculus OX=10090 GN=Wdr7 PE=1 SV=3	35.568	Wdr7	1×Phospho	S1153	0.126	1.359e-07	HTP
				1×Phospho	S1455	0.484	0.0235554	HTP
Q5SXA9	Protein KIBRA OS=Mus musculus OX=10090 GN=Wwc1 PE=1 SV=1	12.143	Wwc1	1×Phospho	S939	0.441	0.042071	HTP/LTP
P68254	14-3-3 protein theta OS=Mus musculus OX=10090 GN=Ywhaq PE=1 SV=1	130.69	Ywhaq	1×Carbamidomethyl [C15]; 1×Phospho [T/S]	[223-245]	3.185	0.000130715	-
Q8VDZ4	Palmitoyltransferase ZDHHC5 OS=Mus musculus OX=10090 GN=Zdhhc5 PE=1 SV=1	56.889	Zdhhc5	1×Phospho	S299	2.677	0.0354057	HTP
