# Supplementary material for: Profilin 1 Controls a Microglial Cytoskeleton Checkpoint to Prevent Senescence and Premature Synaptic Decline
Source: Research Square preprint supplement (doi:10.21203/rs.3.rs-6666431/v1), 2025-08-27
Supplement: Supplementary file 3 [file 6da7873836a49f75086d76aa.xlsx]

## Sheet: You must find the identificatio
Resource Type	Resource Name / Target	Manufacturer / Source	Identifier (Catalog # / Stock #)	RRID
Experimental Models
Mouse Strain	Cx3cr1CreER-EYFP	The Jackson Laboratory	21160	RRID:IMSR_JAX:021160
Mouse Strain	Pfn1 floxed allele	i3S animal facility (ref [72])	Not Specified	RRID:MGI:3842145
Mouse Strain	C57BL/6	i3S animal facility	Not Specified	RRID:IMSR_JAX:000664
Antibodies & Dyes
Primary Antibody	anti-Iba1 (rabbit polyclonal)	Wako	019-19741	RRID:AB_839504
Primary Antibody	anti-CD68 (rat monoclonal)	Bio-Rad	MCA1957	RRID:AB_322219
FACS Antibody	PE anti-mouse CD45 (Clone: 30-F11)	BioLegend	103106	RRID:AB_312968
FACS Antibody	PE/Cy7 anti-mouse CD11b (Clone: M1/70)	BioLegend	101216	RRID:AB_493345
Viability Dye	Zombie Violet™ Fixable Viability Kit	BioLegend	423101	RRID:AB_2572528
Commercial Kits & Reagents
Dental Cement	RelyX™ Unicem Self-Adhesive Resin Cement	3M-ESPE	56848	N/A
RNA Isolation Kit	RNeasy Plus Micro Kit	Qiagen	74034	N/A
Reagent	Agilent RNA 6000 Pico Kit	Agilent Technologies	5067-1513	N/A
Library Prep Kit	Ion AmpliSeq™ Library Kit Plus	Thermo Scientific	4488990	N/A
Kit	Myelin Removal Beads II (mouse)	Miltenyi Biotec	130-096-733	RRID:AB_2785746
Kit	CD11b (Microglia) MicroBeads, mouse	Miltenyi Biotec	130-093-634	RRID:AB_2785709
Reagent	High-Select™ TiO2 Phosphopeptide Enrichment Kit	ThermoFisher Scientific	A32993	N/A
Metabolic Assay Kit	Seahorse XF Cell Mito Stress Test Kit	Agilent	103015-100	N/A
Reagent	Seahorse XF Calibrant	Agilent	100840-000	N/A
Anesthetic	Isoflurane	Abbot	NDC 0074-4959-04	N/A
Reagent	Tetrodotoxin (TTX)	Tocris	1078	N/A
Reagent	D-APV	Tocris	106	N/A
Reagent	(+)-Bicuculline	Enzo	BML-GR303	N/A
Reagent	CNQX	Hello Bio	HB0245	N/A
Instruments
Cryostat	CM3050S Cryostat	Leica Biosystems	Not Specified	RRID:SCR_018063
Microscope	Leica TCS SP8 confocal microscope	Leica Microsystems	Not Specified	RRID:SCR_018169
Cell Sorter	BD FACS Aria III	BD Biosciences	Not Specified	RRID:SCR_018090
Analyzer	Bioanalyzer 2100	Agilent Technologies	Not Specified	RRID:SCR_021321
Analyzer	TapeStation	Agilent Technologies	Not Specified	RRID:SCR_019321
LC System	Ultimate 3000 liquid chromatography system	Thermo Scientific	Not Specified	RRID:SCR_020551
Mass Spectrometer	Q-Exactive Hybrid Quadrupole-Orbitrap	Thermo Scientific	Not Specified	RRID:SCR_013693
Instrument	Ion Chef Instrument	Thermo Scientific	Not Specified	RRID:SCR_019779
Sequencer	Ion S5XL Sequencer	Thermo Scientific	Not Specified	RRID:SCR_019780
Metabolic Analyzer	Seahorse XF24 Analyzer	Agilent	Not Specified	RRID:SCR_024976
Microscope	Axio Examiner.D1 microscope	Carl Zeiss	Not Specified	RRID:SCR_021729
Vibratome	Leica VT1200s vibratome	Leica Microsystems	Not Specified	RRID:SCR_016495
Amplifier	Multiclamp 700B amplifier	Molecular Devices	Not Specified	RRID:SCR_018455
Digitizer	Digidata 1550A	Molecular Devices	Not Specified	N/A
Software
Image Analysis	IMARIS	Oxford Instruments (Bitplane)	v10.1.0	RRID:SCR_007370
Data Analysis	Mathematica	Wolfram Research	v13.x	RRID:SCR_014448
Programming Language	Python	Python Software Foundation	v3.9 / 3.10	RRID:SCR_008394
Behavioral Analysis	SMART	Panlab	v3.0	RRID:SCR_002762
Behavioral Analysis	EthoVision XT	Noldus	v16 / 17	RRID:SCR_000441
Behavioral Analysis	Smart Video Tracking Software	Panlab / Harvard Apparatus	v2.5	N/A
Flow Cytometry	FlowJo	BD (TreeStar)	v10.8	RRID:SCR_008520
Sequencing Analysis	Torrent Suite	Thermo Scientific	v5.12	RRID:SCR_019803
Transcriptomics	Transcriptome Analysis Console	Thermo Fisher Scientific	v4.0	RRID:SCR_014228
Proteomics	Proteome Discoverer	Thermo Scientific	v2.5 / v3.0	RRID:SCR_014477
Database	STRING	STRING Consortium	v11.5	RRID:SCR_005223
Network Analysis	Cytoscape	Cytoscape Consortium	v3.9.x	RRID:SCR_003032
Database	PhosphositePlus	Cell Signaling Technology	Accessed 2022-2023	RRID:SCR_002231
Kinase Analysis	NetworKIN	Not Specified	v3.0	RRID:SCR_002162
Interaction Database	Stitch	EMBL	v5.0	RRID:SCR_003509
Mutation Analysis	Mechismo	Not Specified	Web server	RRID:SCR_003522
Metabolic Analysis	Wave Software	Agilent Technologies	v2.6	RRID:SCR_021109
Electrophysiology	pCLAMP Software Suite (Clampfit)	Molecular Devices	v11	RRID:SCR_011323
Statistical Analysis	GraphPad Prism	GraphPad Software	v9.0.2	RRID:SCR_002798
Figure Preparation	Adobe Illustrator	Adobe	2020 (v24.3)	RRID:SCR_010279
Figure Preparation	BioRender	BioRender.com	Web-based	RRID:SCR_018361
