# Supplementary material for: Profilin 1 Controls a Microglial Cytoskeleton Checkpoint to Prevent Senescence and Premature Synaptic Decline
Source: Research Square preprint supplement (doi:10.21203/rs.3.rs-6666431/v1), 2025-08-27
Supplement: Supplementary file 4 [file 903184c4ffa6de993ce115e7.xlsx]

## Sheet: 04 03 2020 Prof1 Sample Signals
Column1	Column2	Column3	Column4	Column5	Column6	Column7
#%result_name=Prof1 04.03.2020 FDR True
#%array_type=AmpliSeq_Mouse_Transcriptome_V1_Designed
#%annotation=AmpliSeq_Mouse_Transcriptome_V1_Designed.transcript.csv
#%comparison=flfl cre+ vs flfl
ID	1324 (CT)	1325 (cKO)	1330 (cKO)	1332 (CT)	1333 (cKO)	1334 (CT)
Gdf3	0,1	7,28	7,32	0	6,79	0,23
Cxcr4	1,22	8,13	8,68	1,02	8,35	1,79
Tlr8	0,1	7,08	7,27	0	7,22	0,43
Ms4a4a	0,53	7,27	7,36	0,29	7,5	0,12
Clec12a	0,6	7,07	7,38	0,53	7,33	0,23
Ms4a7	0,37	7,14	7,35	0,37	6,92	0,52
Itgal	0,8	7,54	7,45	0,53	7,28	1,31
Cybb	1,78	8,46	8,25	1,58	7,97	2,87
Apoe	4,67	11,1	11,07	4,63	11,05	4,55
Runx3	0,29	6,67	6,36	0	6,31	0,12
Klra2	0,2	6,63	6,33	0,29	6,2	0
Ifi203	0,37	6,5	6,45	0,37	6,26	0,43
Plbd1	0	6,22	6,2	0,29	6,09	0,52
Mndal	0,29	6,29	6,21	0,2	6,12	0,61
Cyp4f18	0,37	6,44	6,54	0,8	6,31	0,97
Ms4a14	0,37	5,98	5,64	0	5,39	0
Siglec1	2,75	8,37	8,41	2,34	8,56	3,57
Serpinb8	0,1	5,83	5,66	0,53	5,55	0,12
H2-Eb1	2,11	8,75	8,67	3,27	8,48	3,06
Slamf7	0,1	5,72	6	0,29	5,74	1,03
Itga4	1,35	6,79	6,72	1,26	6,26	1,63
Pf4	1,72	7,05	6,99	1,61	7,17	1,79
H2-Aa	1,87	8,31	8,51	3,06	7,82	2,87
Pla2g7	1,51	7,01	6,91	2,32	6,86	1,67
Cmah	0,1	5,51	5,4	0,2	5,28	0,34
Myof	0,29	5,58	5,19	0	5,44	0,43
Ptger4	1,95	6,7	6,9	1,43	6,79	1,63
Axl	3,95	9,21	9,41	4,17	9,18	5,18
Sorbs3	1,35	6,96	6,73	1,72	6,85	1,79
Ahr	0,29	5,34	5,72	0,29	5,17	0,43
Cd36	0,2	5,45	5,37	0,37	5,84	0,34
Ctse	0,86	5,93	5,83	0,86	5,97	0,97
Ehd1	1,58	6,67	6,52	1,78	6,79	2,08
Vcam1	2,74	7,73	7,6	2,8	7,51	3,76
Cd74	5,61	10,83	10,89	6,14	10,82	6,35
Ccnd2	0,67	5,89	4,86	0,6	5,32	0,69
Cp	0,67	5,3	5,63	0,67	5,29	0,84
Oas2	2,89	7,63	7,43	3,06	7,59	4,94
AI607873	2,53	7,29	7,13	2,55	7,03	4,12
Adam19	0,97	5,28	5,19	0,29	4,93	0,61
Cd93	0,29	4,66	4,5	0	4,54	0
Mrc1	4,18	8,77	8,55	3,83	8,68	4,31
Pydc4	1,35	6	6,06	1,68	5,97	3,63
Emilin1	1,68	6,07	6,06	2,34	5,95	1,55
Lyz2	8,35	12,73	12,82	8,74	12,78	8,39
H2-Ab1	3,19	8,18	8,45	3,8	7,79	4,02
Ifi44	0,2	4,31	4,48	0,1	4,53	1,82
Jag1	0,97	5,46	5,37	1,02	5,1	1,03
Igf1	1,26	5,09	5,16	0,91	5,26	0,69
Reps2	0,86	5,28	4,96	0,86	5,04	1,21
Trps1	2,13	6,23	6,3	2,03	6,04	1,96
Aoah	0,73	4,8	4,1	0	4,57	0,52
F630028O10Rik	1,02	5,61	5,06	1,02	5,04	1,21
C3	1,9	5,74	5,83	1,75	6,03	2,97
Oas1g	1,35	5,32	5,41	1,47	5,44	2,83
Cdc42bpg	1,31	6,07	5,14	1,72	5,62	1,63
Lgals1	2,01	6,02	5,97	1,87	5,95	2,25
Dach1	0,1	4,07	4,05	0	3,55	0,12
Acp5	0,37	4,02	4,29	0,1	4,55	0,52
Gpr65	1,72	5,92	6,28	2,01	5,81	2,25
Cpne2	1,75	5,66	5,64	1,54	5,82	1,86
Oas3	1,07	4,99	5,18	1,07	4,74	3,24
Ccr1	3,8	7,45	7,37	3,2	7,51	3,59
Clec4n	0	3,86	4,1	0,29	3,72	0
Stap1	0,2	3,87	4,2	0,2	4,07	0
Cd300lf	2,87	7,2	6,63	2,95	6,76	3,76
Gpr31b	1,35	5,37	5,02	1,22	5,06	2,11
Dram1	0,86	4,73	4,36	0,8	4,53	0,69
Arhgap15	1,84	6,11	5,98	2,23	6	2,28
Iqgap2	0,1	4,4	4,21	0,73	4,54	0,97
Antxr2	0,8	4,51	4,62	1,17	4,22	0,69
Vnn3	0	3,66	3,91	0	3,7	0
Clec2i	0,91	4,53	4,8	1,07	4,9	1,41
Pdpn	0	3,84	3,22	0,1	3,73	0,23
Sirpb1b	0	3,66	3,78	0,1	3,63	0
Nlrc4	0,1	4,1	3,72	0	3,52	0,12
Thbd	0,1	4,01	3,73	0	3,57	0,34
Tmem221	3,38	7,01	6,87	3,38	7,02	3,59
Ciita	0,2	4,13	4,36	0,6	3,29	1,03
Fgf2	2,75	6,54	6,01	3,16	6,28	2,52
Qpct	1,07	4,53	4,66	1,07	4,55	1,36
Rara	0,37	3,85	3,97	0,73	4,11	0,52
Slc2a6	2,2	6,05	6,13	2,59	6,01	3,19
Sash1	1,39	5,2	4,97	1,72	4,6	1,5
Sh3pxd2b	1,26	4,68	4,83	1,35	4,49	1,21
Ch25h	0,37	3,76	3,66	0,1	3,84	0,61
Mdfic	2,77	5,78	5,95	2,46	6,01	2,54
Emilin2	0,53	3,97	3,72	0,2	3,64	0,43
Dab2	5,39	9,08	8,74	5,4	8,67	5,8
Tmem51	0,1	3,36	3,58	0,8	3,51	0,23
Itsn1	3,27	6,85	6,16	3,43	6,54	2,85
BC064078	1,78	4,96	5,16	1,9	5,14	1,96
Fgl2	4,26	7,52	7,62	4,33	7,51	5,02
Cd40	1,61	5,25	5,28	1,98	5,2	3,05
Nlrc3	0,86	4,18	4,4	1,22	4,08	0,97
Cd72	4,52	8,15	7,95	4,99	8,15	5,3
Tnfsf8	2,51	5,77	5,69	2,57	5,66	3
Plxnc1	1,26	4,65	4,38	1,17	4,35	1,67
Adgrg5	0,45	3,61	3,97	0,53	3,62	1,03
Slit1	1,07	4,16	3,89	1,31	4,23	0,76
Itgb8	1,02	4,13	4,18	1,26	3,7	0,91
Cd44	1,26	5,05	5,34	2,25	5,34	2,22
Cxcl14	0	4,06	3,37	0,6	3,7	1,21
Spp1	2,48	4,7	5,45	2,11	5,57	2,4
Gas7	1,26	4,64	4,5	1,84	4,59	1,46
Xdh	0,53	3,6	3,43	0,29	3,79	0,76
Unc119	0,2	3,54	3,2	0,37	3,28	0,23
Oasl1	0,97	4,12	4,27	1,17	3,58	2,4
C920009B18Rik	1,54	4,89	4,58	1,54	4,49	1,75
Ifnlr1	0,2	3,9	3,02	0	3,22	0,34
H2-Q6	5,09	7,88	7,98	4,85	8,15	6,54
Runx2	0,73	3,77	3,85	1,12	3,46	0,61
Sh2d1b1	0,67	4,22	4,14	1,17	4,07	1,09
Myo5a	4,77	7,89	7,62	4,6	7,8	4,98
Bhlhe40	2,34	5,17	5,23	1,95	5,61	2,22
Gsn	2,16	5,37	5,23	2,36	5,45	2,38
Kcnn4	3,67	6,83	6,67	3,92	6,77	3,81
H2-Q7	2,51	5,68	5,62	2,8	5,61	4,16
Hcar2	0,6	4,2	4,2	1,22	4,45	2,11
Ifi204	1,95	4,86	4,81	1,95	4,88	2,83
Plxnd1	1,43	4,84	4,63	2,03	4,49	1,75
Col14a1	0,1	3,35	2,86	0	2,52	0
Scimp	3,46	6,58	6,32	3,3	6,34	3,57
Gm33058	0,1	2,98	2,9	0,2	3,07	0
F13a1	0,37	4,29	4,05	1,47	4,43	1,36
Slc28a2	0	3,18	2,85	0	2,84	0,23
Zmynd15	3,61	6,72	6,39	3,13	6,4	4,01
Ccl2	2,96	5,63	5,81	2,72	5,96	3,57
Fxyd5	3,49	6,83	7,11	4,07	6,8	3,98
Cdkn2a	0,29	3,17	3,47	0,37	2,87	0,61
P2ry14	0,1	2,97	2,51	0,1	2,87	0,43
Ms4a4c	1,02	4,51	4,89	1,68	4,52	1,82
Pstpip1	2,9	5,67	5,73	2,89	5,48	2,74
Mgst1	0	2,51	2,85	0,37	3,33	0,12
Lox	1,75	4,56	4,47	1,47	4,9	2,38
Cxcl16	6,65	9,49	9,5	6,76	9,51	7,12
Kcnab2	1,47	4,59	4,75	1,93	4,52	2,2
Mllt4	3,15	6,34	6,22	3,85	6,01	3,47
Clec7a	6,14	9,18	9,03	6,29	9,01	6,54
Tmem205	2,77	5,39	5,52	2,74	5,47	3,22
Cyfip2	2,03	5,31	5,14	2,57	5,43	2,6
Slfn4	0,1	2,7	2,45	0	2,78	0
Nedd9	1,87	4,82	4,67	1,95	4,27	2,08
Fam110b	0,37	2,79	2,91	0,1	3,07	0,23
Rai14	1,78	4,92	4,53	1,95	4,62	1,96
Iqgap1	3,49	6,68	6,43	3,75	6,42	3,79
Ccl12	5,82	8,53	8,6	6,05	8,63	7,13
Vim	1,84	4,4	4,79	2,06	4,6	1,96
Bst1	0,53	2,15	3,35	0,73	3,38	0,91
Ms4a6c	5,13	8,39	8,26	5,65	8,17	5,63
C630043F03Rik	0,8	3,2	3,08	0,45	3,04	0,12
Hip1	2,01	5,02	4,76	2,51	4,59	2,17
Clec4d	0	1,93	2,59	0	2,52	0
Pde7b	0,1	2,63	2,85	0,1	2,67	0,12
Kcna3	4,13	7,29	6,68	4,05	6,59	4,52
LOC102639543	0,8	3,33	2,86	0,6	3,26	1,59
Kalrn	2,01	4,56	3,17	2,75	4,46	1,99
Hs3st1	0,8	2,97	2,29	0,37	3,42	0,43
Ldlrad3	1,12	3,54	3,59	1,07	3,76	0,76
Gm1966	2,74	5,59	5,54	3,1	5,25	3,31
Adam33	0,1	2,68	3,21	0,2	2,24	0,43
Ascl4	0,2	2,8	2,67	0,2	2,6	0
AI504432	2,77	5,68	5,26	2,62	5,28	2,8
Cd300ld	0,29	3,45	3,54	0,97	3,39	1,15
Xylt1	2,8	5,62	5,45	2,95	5,14	3,37
Clic4	4,82	7,72	7,57	5,1	7,56	5,42
Folr2	1,75	4,22	3,76	1,81	4,4	1,55
Tgfbi	7,1	9,71	9,55	7,24	9,36	7,07
C030034L19Rik	0,97	3,77	3,15	0,73	3,16	0,69
Kynu	1,12	3,83	3,73	1,43	4,1	1,63
Pltp	3,32	5,52	5,76	3,53	6,02	3,13
Pdlim7	1,84	5,02	4,37	2,79	4,33	1,99
Serpinb6b	0,6	3,21	3,02	0,45	2,87	0,76
Bst2	6,29	8,99	9,09	6,69	9,09	6,83
Lrig1	0,2	3,15	3,09	1,31	3,09	0,61
Zbp1	2,03	4,14	4,55	1,51	4,54	3,03
Zc3h12d	0,37	3,06	2,8	0,2	2,81	0,91
St3gal1	3,27	5,53	5,42	2,82	5,17	2,97
Bmp2	0,1	2,26	2,38	0	2,7	0
Fam132a	0,73	3,41	3,43	1,47	3,72	0,97
Gpr132	0,2	2,28	2,67	0,29	2,9	1,15
Mmp9	0	1,46	3,36	0,1	2,37	0
Hepacam2	0	2,4	2,65	0,1	2,04	0
Pdcd1	4,71	7,21	7,46	5,08	7,52	5,1
Fzd7	2,34	4,88	4,71	2,2	4,71	2,52
Msr1	0	2,68	2,34	0	2,21	0
Rftn1	3,81	6,18	6,15	3,81	6	4,2
Ccl7	0,37	2,28	2,99	0,2	2,78	0,61
Grap2	0,1	2,35	2,8	0	2,21	0
Map4k1	1,84	4,17	3,84	1,58	4,18	1,82
Wfdc17	0,91	3,29	3,63	1,17	3,52	1,36
LOC100038947	0,37	3,03	2,31	0	2,35	0
Vill	1,31	4,12	3,82	1,54	3,69	1,5
Cd200r4	1,61	3,72	3,74	1,43	3,92	1,15
Metrnl	3,24	5,47	5,29	3,08	5,56	3,13
Spic	0,1	2,3	2,61	0	2,3	0
Arhgap10	1,07	3,57	3,15	1,51	3,87	1,21
Cdkn1a	4,49	6,19	6,78	4,3	6,75	4,56
Ptpn22	2,67	5,19	4,94	2,66	4,84	3
Batf2	0,8	4,02	3,5	1,26	3,6	1,82
Slfn1	0	2,01	2,73	0,1	2,3	0,61
Gdpd5	3,73	6,2	6,02	3,86	5,83	3,64
Hgf	1,78	4,22	4,1	2,23	3,81	1,82
Slc26a11	2,67	4,82	4,91	2,5	4,41	2,58
Gm10791	0,2	2,62	2,05	0,1	2,39	0
Chac1	0,53	2,89	2,43	0,67	3,24	1,41
Sh3d19	1,39	2,97	2,9	0,6	2,63	0,69
Pxdc1	4,86	7,13	7,14	4,89	6,91	4,97
Gk	1,98	3,99	4,24	1,84	4,38	2,11
Fam214a	4,25	6,63	6,83	4,37	6,41	4,56
AW112010	4,19	6,8	6,71	4,45	6,43	4,48
Vav3	0	2,22	2,29	0,45	1,96	0
Sh3bp4	1,54	3,97	4,05	2,16	4,01	1,75
Psd3	1,54	3,96	3,38	1,43	3,81	1,89
Cd69	0,2	2,4	2,65	0,2	2,32	0,91
Ezr	2,42	5,09	4,85	2,86	4,8	2,6
Kank2	3,65	6,15	5,8	3,59	5,54	3,62
Oasl2	4,35	7,24	7,31	4,99	7,27	6
Cyp4f17	1,39	3,82	3,56	1,39	3,58	1,71
Kcnh4	1,65	4,16	4,15	1,93	4,25	2,49
Sestd1	0,91	3,27	2,91	1,39	3,12	0,52
Usp18	2,62	4,92	4,82	2,69	4,8	3,87
Itgax	5,35	7,29	7,56	5,48	7,56	6,19
Bcar3	0,2	3,56	3,41	1,43	3,48	1,26
2310001H17Rik	1,12	3,79	3,89	1,68	3,71	2,14
Stom	5,09	7,26	7,22	5,1	7,15	4,97
Syne1	1,75	3,91	3,67	2,38	3,95	1,41
Ifi27l2a	2,51	4,65	5,01	2,83	5,3	3,36
Tmem150b	1,58	4,21	3,76	2,01	3,66	1,41
Gab3	3,53	5,4	4,81	3,32	5,49	3,35
Rgs18	0	2,38	2,16	0,1	2,21	0,12
Lrrc8c	2,71	4,55	4,37	2,42	4,68	2,45
Ctla2b	3,58	5,55	5,69	3,58	5,68	3,72
Zfp599	0,1	1,98	2,21	0,1	2,19	0,12
Itga8	0,67	2,79	2,65	0,29	2,73	0,61
Kcnj10	5,07	7,14	7,18	5,16	6,8	4,99
Apoc4	0	2,15	1,73	0	2,07	0
Plppr2	2,44	4,14	3,68	1,65	4,15	2,08
Tmem82	2,87	4,94	5,11	2,8	4,96	2,95
Tnik	1,51	4,13	3,12	1,95	3,58	1,15
Cd38	0,1	2,22	1,8	0,2	2,41	0,12
Snhg11	4,87	6,92	5,69	5,21	7,32	4,27
Mcam	1,61	3,71	3,69	1,51	3,57	1,82
Tmem8	1,31	3,15	3,31	1,07	3,12	1,09
Etl4	1,43	3,55	4,02	1,98	3,63	1,55
Nostrin	0,1	2,22	2,11	0,37	1,48	0,12
Emb	0,45	2,38	3,03	1,22	2,09	0,34
Alcam	0,29	2,55	2,85	0,67	2,72	1,03
LOC102632465	0,86	2,96	2,83	0,97	3,09	1,67
Gm32448	0,37	2,44	2,13	0,37	2,61	0,84
Fam65b	3,5	5,7	5,65	3,61	5,59	3,72
Il1b	2,4	4,64	4,43	1,35	4,21	2,7
Gpx3	0,45	2,83	2,4	0,53	2,54	0,69
Nlrc5	4,07	6,21	6,1	4,04	5,87	4,62
Pxylp1	0,6	3,08	2,59	1,12	2,9	0,84
Slc1a5	2,01	4,59	4,17	2,34	4,07	2,11
Tmem176a	7,15	9,27	9,4	7,42	9,11	7,24
Cst7	1,51	3,41	3,91	2,38	4,64	1,99
Aph1b	1,81	4,05	4,18	2,06	3,93	2,05
Cd244	1,58	4,05	3,92	2,13	4,32	2,45
Cmpk2	2,72	4,77	4,8	2,86	4,47	4,03
Cxcr3	1,54	3,56	3,52	1,65	3,88	1,46
Apobec1	4,64	6,8	6,67	4,72	6,53	5,09
Miat	2,5	4,82	3,62	3,1	4,52	2,49
C1qtnf1	0,29	1,6	2,31	0,45	2,35	0,34
Anxa2	0,97	2,67	2,93	1,43	3,28	0,84
Maff	0,53	3,1	2,05	1,12	3,02	1,55
Arhgap6	0	2,77	1,99	0,45	2,51	0,52
Gpnmb	0,1	1,35	2,08	0,1	2,07	0,52
Lgals3	1,17	2,57	3,24	0,91	3,58	1,59
Fap	0	2,36	2,11	0,37	2,37	0,43
Zbtb16	0,73	2,62	2,51	0,45	1,76	0,61
Pcgf2	2,89	4,92	4,7	3,05	4,85	2,68
Plxna1	3,8	5,48	5,86	3,25	5,5	3,52
Fos	0,8	2,82	2,73	0,86	2,91	0,97
Cerkl	0,29	2,13	2,36	0,37	2,47	0,52
Lyz1	0,2	1,98	2,16	0,67	2,67	0
Atrnl1	1,75	3,91	3,82	1,95	4,17	2,3
Ahnak	0,45	2,38	2,21	1,02	3,1	0,34
Dnase1l1	2,62	4,76	4,74	3	4,66	2,8
St8sia4	4,63	6,67	6,36	4,44	6,25	4,39
Hoxb3	0,37	1,88	2,34	0,45	2,35	0
Phf11a	1,26	3,72	3,75	1,72	3,56	2,7
Lrrc16a	2,23	4,32	4,46	2,5	4,48	3,01
Trerf1	1,17	3,12	3,26	1,35	3,11	1,09
Mob3b	0,97	3,12	2,57	0,67	2,19	0,43
Rasgrp1	1,68	3,21	3,63	1,39	3,32	1,21
Gm39888	0,1	1,76	2,05	0,1	2,17	0,43
Ifitm6	0	0,94	2,86	0	1,93	0
Tnip3	0,1	1,5	1,99	0	2,04	0,12
Nt5e	0,29	2,26	2,21	0,37	1,4	0,34
Oas1a	3,43	5,8	5,88	3,96	5,82	4,36
Rsad2	0,86	3,06	2,9	1,07	2,61	2,11
Mcemp1	0,37	2,24	2,34	0,1	2,28	0,43
Bcl3	3,1	5,48	4,95	3,34	5,3	3,88
Etv4	1,07	3,29	3,38	1,47	3,88	1,59
B3gnt8	3,9	5,68	5,98	3,83	5,46	3,65
H2-Q5	5,28	7,17	7,48	5,36	6,91	5,94
Stard13	0,1	2,06	1,9	0	1,59	0
Trpv4	3,42	5,69	5,86	4,26	5,79	3,99
Bend4	0,37	2,01	2,24	0,29	2,14	0
Rnf43	0	1,76	1,96	0,2	2,14	0,12
Tk1	1,68	3,09	3,43	1,58	3,97	2,35
Meg3	6,31	8,1	7,06	6,77	8,34	6,12
Asgr2	2,27	3,29	3,82	1,98	3,85	1,79
Stxbp6	0,67	2,38	2,34	0,53	2,12	0,52
Arl5c	4,78	5,86	6,63	4,82	6,59	4,79
Shtn1	1,07	3,34	2,85	1,43	3,25	1,5
Irf7	4,2	6,57	6,47	4,58	6,47	5,67
Cd4	0,1	1,93	2,51	0,29	1,93	0
Tle1	2,34	4,57	4,57	2,77	4,62	2,76
Fcho1	2,13	4,35	3,98	2,62	3,95	2,2
Galc	5,08	6,88	6,82	5,09	6,93	5,27
Lrp8	1,43	3,18	2,47	1,78	3,24	1,03
Fbxw17	1,68	3,85	3,29	2,11	3,9	2,42
Aifm3	1,47	3,34	2,49	2,36	3,22	1,5
Pfkp	1,93	3,85	3,6	2,03	4,01	2,05
Plekhg1	0,1	2,08	1,27	0,29	2,12	0,84
Chp2	0,2	1,93	1,99	0,29	2,51	0
Cpne6	0,86	2,3	1,45	0,53	2,3	0,52
Frmd6	1,22	3,07	2,74	1,07	2,9	0,43
Mx1	3,15	5,25	4,92	3,35	5,01	4,43
4833411C07Rik	4,02	6,25	5,65	4,25	6,04	4,45
Gpr176	0,2	1,7	2,16	0,2	1,99	0
Mmp25	0,91	2,57	2,81	0,45	2,73	1,55
Tm4sf5	0,37	1,98	1,73	0	2,19	0,23
Milr1	5,44	7,36	7,2	5,54	7,31	5,65
Lmna	3,2	5,11	4,81	3,03	4,77	2,93
H2-K1	9,59	11,25	11,42	9,71	11,55	10,24
Gapt	0,1	1,93	1,73	0	1,59	0
Creg2	1,35	3,31	3,09	1,35	3,09	1,36
Anln	1,61	3,42	3,21	1,31	3,53	2,14
Phlda3	0,29	1,79	2,38	0,91	2,3	0,61
Olfr98	0,1	1,82	2,11	0,1	1,85	1,03
Tespa1	0	1,39	1,76	0	1,99	0
Nceh1	4,83	6,63	6,62	4,88	6,61	5,02
Dse	4,6	6,6	6,58	4,88	6,42	4,86
Rxrg	1,9	3,68	3,76	2,55	3,7	2,02
Ccl8	0,1	2,01	1,76	0	1,08	0
Anxa5	5,46	7,29	7,17	5,44	7,01	5,34
Plekhg3	0,53	2,26	1,96	0,53	2,45	1,09
Gm35522	2,46	4,18	4,33	1,9	3,77	2,97
Tjp3	0,2	2,44	2,51	0,86	2,52	1,09
Il1rn	0,29	2,18	2,43	0,45	2,19	0,91
Lpcat4	1,87	3,9	3,58	1,95	3,44	1,36
Trim59	1,22	2,79	2,97	0,8	3,1	1,82
Car13	0,73	2,42	2,36	0,67	1,91	0,69
Celf3	2,13	3,94	2,97	2,16	3,77	1,92
Crip1	2,08	3,67	3,8	2,69	4,1	2,17
H2-Bl	2,01	3,56	3,8	1,95	3,66	2,45
Stbd1	3,03	4,73	5,18	3,14	4,65	2,81
Fcgr4	4,23	5,91	6	4,37	6,1	4,97
Cd52	7,64	9,28	9,32	7,5	9,53	7,71
Zc2hc1a	1,31	3,2	3,16	1,58	3,14	1,5
Kcnt1	0,67	3,07	2,57	2,18	3,2	1,41
Htra3	5,06	6,96	6,84	5,32	6,79	5,18
Acvrl1	5,48	7,07	6,96	5,34	7,06	5,39
Nfxl1	6,01	7,72	7,55	6,06	7,75	6,24
Slc41a2	0,29	1,96	1,65	0,37	2,17	0,12
Capn1	4,57	6,18	6,39	4,72	6,41	4,97
Fam20c	1,39	2,96	3,18	1,12	3,1	1,86
Gabbr2	2,36	4,76	4,07	3,09	4,99	3,06
Mpp1	5,12	6,97	6,75	5,24	6,67	5,1
Sdc3	7,37	9,11	9,13	7,46	9,29	7,77
Anxa1	0,2	0,94	2,51	0,1	1,93	0,52
Car9	1,58	2,77	3,03	1,43	3,35	1,15
Apoc1	0,2	2,11	1,93	0,29	1,82	0,52
4930455G09Rik	0,29	1,54	1,83	0,2	1,85	0,12
Clec2d	6,81	8,48	8,45	6,75	8,44	6,82
Rgs11	1,31	2,98	2,93	1,75	2,72	0,84
Cep170b	2,64	4,87	4,2	3,11	4,53	2,92
Myo10	1,95	2,48	3,13	1,02	3,09	1,46
Hsf4	0,29	2,28	1,58	0,86	1,96	0,34
Pigz	3,41	5,04	5,05	3,54	4,98	3,41
Clec10a	0	1,93	2,02	0,37	2,43	0,34
Soat2	3,57	5,18	5,05	3,59	5,46	4,11
Mapt	1,39	2,96	2,31	1,35	3,11	1,79
Acod1	0,37	1,85	2,05	0	2,07	1,09
H2-Q4	5,4	7,14	7,14	5,53	7,03	5,99
Arhgef3	3,04	4,42	4,63	2,97	4,66	3,3
Pde10a	2,36	4,26	3,97	2,4	3,76	2,62
B4galnt4	2,03	4,21	3,08	2,2	3,85	2,17
Pyhin1	3,14	5,1	5,19	3,47	4,44	4,19
Eps8	2,13	3,78	2,99	2,16	3,75	2,2
Eml2	2,2	3,66	3,79	2,01	3,91	2,17
Cyp4f16	3,62	5,2	5,06	3,7	5,2	3,42
Ly9	2,55	4,99	5,07	3,76	4,83	3,43
S1pr2	3,7	5,31	5,6	3,76	5,31	3,48
Bzrap1	2,01	3,54	2,9	2,69	3,68	1,99
Arpp21	2,44	4,07	3,06	2,75	4,05	2,3
Fgd1	0,29	1,9	1,45	0,45	1,88	0,23
Ikbke	1,12	2,62	2,08	1,02	3,36	1,82
Ddo	0	1,57	1,62	0	1,08	0,12
Fam212b	1,02	2,5	2,61	1,17	2,76	0,91
Sema4a	2,48	3,82	4,29	2,34	4,09	2,49
Sdc4	5,33	6,94	6,87	5,34	6,92	5,44
Ubxn11	1,93	3,82	3,47	1,93	3,31	1,86
H2-D1	9,31	10,9	10,93	8,95	11,12	9,8
Tsku	0	1,57	1,58	0	1,22	0,34
Slfn5	3,39	5	5,03	2,99	5,03	4,54
Nrbp2	2,97	4,78	4,19	3,55	4,72	3,15
Slc14a1	3,35	4,93	4,91	3,09	4,68	3,63
Cbr2	1,17	3,04	3	1,93	3,44	1,41
Ntng2	1,39	3,52	2,51	1,43	2,93	1,86
Krt80	0,53	1,73	2,11	0,29	2,32	0,61
Csf2ra	7,18	9,06	8,82	7,5	9,12	7,52
Alpk1	3,42	5,31	5,14	3,56	4,93	3,75
Mmp14	6,14	7,69	7,73	6,14	7,65	6,07
Xylt2	5,47	7	6,9	5,35	7,2	5,5
Kcnq2	2,13	3,74	3,25	2,89	3,82	2,28
Spats2l	0,29	1,5	1,83	0,2	1,93	0,34
Cdca7l	1,02	3,04	2,97	1,47	2,67	1,86
1700003E16Rik	0,45	2,6	1,99	1,07	2,61	1,26
Plk3	4,79	6,96	6,88	5,37	6,71	5,61
Gm30189	1,87	3,38	3,21	2,18	3,41	1,5
Aph1c	1,07	3,63	3,3	2,16	3,71	2,08
Lilra5	5,33	7,54	6,89	5,57	7,01	5,42
Ctsc	7,88	9,22	9,52	7,65	9,44	7,92
Cox6b2	1,47	3,03	2,86	1,47	3	1,26
Kif27	0,73	3,01	2,31	0,53	2,12	1,21
Igsf9	3,31	5,11	4,82	3,2	4,73	3,35
Bambi-ps1	0,45	1,98	1,76	0,29	1,62	0
Sp100	4,86	6,82	6,58	5,04	6,6	5,48
Sh3bgrl	2,13	4,19	4,47	2,92	4,45	2,97
N4bp3	0,91	1,7	2,31	0,6	2,24	0,76
Glipr1	4,33	6,02	6,14	4,53	5,94	4,5
AF529169	1,39	3,01	2,61	1,12	2,72	1,21
Lrrk2	0,1	1,31	1,73	0,1	1,62	0,52
Fbn2	0	1,76	1,49	0,1	1,51	0
Hdac7	2,16	3,93	3,55	2,2	3,69	2,28
Dlgap2	1,31	2,94	1,83	1,61	2,73	0,97
Fut4	2,78	4,34	4,29	2,61	4,04	3,11
Slc2a3	3,37	4,76	4,85	3,53	5	3,37
Sgsh	5,58	7,23	7,04	5,74	7,26	5,76
Adgrb3	1,95	3,74	2,67	2,53	3,53	2,08
Aldh1b1	0,53	2,68	2,53	1,07	2,6	1,15
Rab3d	2,78	4,42	4,56	3,2	4,22	2,9
Nfkbiz	6,48	7,91	8,25	6,41	7,97	6,78
Rarg	1,81	3,39	3,26	2,01	3,11	1,26
Fuom	2,77	4,24	4,05	2,66	4,51	2,8
Ldlr	4,69	6,17	6,1	5	6,63	4,63
Slamf9	6,4	7,83	7,91	6,33	7,88	6,46
Gcm2	0,2	1,6	1,73	0,29	1,99	0,34
Gm6904	1,35	3,14	3,12	1,61	3,25	2,08
Dgkg	1,12	2,6	2,21	1,81	2,56	1,09
Prrg1	0,2	1,67	1,73	0,2	1,48	0
Chic1	2,03	3,17	3,4	1,65	3,26	1,79
Fgr	3,3	4,72	4,76	3,25	4,74	3,73
2500002B13Rik	1,51	3,68	2,91	2,03	3,12	1,67
Dnase1l3	0,73	2,2	2,19	0,73	1,85	1,26
Chrm3	1,61	3,2	2,53	2,25	3,07	1,21
Cpd	5,89	7,62	7,34	5,82	7,26	6,14
Ptpn7	0,8	1,88	2,19	0,45	2,7	0,76
Sik1	1,78	3,52	3,48	2,5	3,43	1,99
Mfsd6	0,86	2,62	1,99	1,07	2,9	1,63
Egr1	4,32	5,22	5,75	3,97	5,41	3,84
Slc38a6	6,52	8,33	8,1	6,63	8,06	6,66
F830208F22Rik	1,31	3,14	3,3	1,72	2,94	1,67
Tnfsf13b	5,98	7,91	7,92	6,52	7,88	6,43
Foxred2	0,53	2,53	1,96	0,73	1,96	0,52
Csrp1	2,93	4,37	4,33	2,89	4,36	3,01
Dnm1	3,91	5,34	4,53	4,36	5,42	3,99
Gpr162	4,02	5,16	5,43	3,98	5,51	4,22
Pstpip2	2,13	3,08	3,13	1,68	2,68	1,55
Stk39	0,73	2,13	2,49	1,02	2,61	1,5
Osbpl10	0,97	3,2	2,74	1,26	1,93	1,26
Ak8	0,1	1,5	1,31	0,1	1,72	0
Nfib	0,97	2,38	1,69	1,31	2,3	0,91
Htatip2	2,66	4,07	3,93	2,38	4,12	2,97
Sqle	2,01	3,09	3,37	1,84	3,77	1,99
F630111L10Rik	0,37	1,6	1,8	0,45	1,76	0,23
Fam189a2	0,1	1,54	1,49	0,1	1,36	0
Gria1	2,29	4,13	3,27	3,09	3,7	2,33
Aqp9	0	1,18	1,58	0	1,4	0
Haus8	4,22	5,42	5,44	4,03	5,23	3,92
Zdhhc23	0,1	2,22	1,73	0,53	1,18	0,34
Rab36	1,75	3,13	2,71	1,95	3,31	1,31
Tnf	0,6	1,73	2,13	0,2	2,04	1,26
Rnf217	0,73	1,98	1,69	0,1	1,76	0,34
Slc25a24	0	1,35	1,16	0	1,69	0
Cntnap1	2,77	4,59	3,91	2,79	4,12	3,38
Ccdc159	0,37	2,35	1,27	0,67	1,79	0,43
Cdr2	1,51	3,08	2,86	1,43	2,56	1,89
Fas	1,17	2,38	2,11	1,02	2,58	0,69
Tnni3	3,1	4,7	4,41	3,24	4,63	3,27
Pgap1	2,27	3,86	3,74	2,9	3,68	2,4
P4ha2	0,91	2,74	2,31	1,12	2,28	0,84
Atp1a3	6,54	8,24	7,94	6,92	8,28	6,87
Chd5	1,51	3,01	2,08	2,01	2,83	1,5
Fgf14	0,67	2,06	2,11	1,17	2,14	0,76
Pim1	3,77	5,35	5,21	3,86	4,81	4,52
Ngef	1,17	2,51	2,11	1,95	2,6	1,21
E2f1	2,31	3,68	3,76	2,29	3,52	2,72
Lpl	5	6,44	6,53	5,17	6,83	5,17
Grm5	2,44	3,91	3,2	2,79	3,84	2,52
Crym	0,2	1,22	1,8	0,2	1,59	0,43
Tmem178b	1,78	3,32	2,47	1,9	3,81	1,99
Masp1	2,8	4,19	4,14	2,69	4,13	3,2
Mgat5b	0,8	2,22	1,62	1,22	2,49	0,84
Hist1h3d	3,85	5,53	4,81	3,78	5,15	4,42
Best1	1,65	2,87	3,09	1,39	2,84	1,5
H2-DMb2	4,69	6,37	6,04	4,85	5,99	4,66
Gria2	2,87	5,03	3,79	3,61	4,67	3,28
Ptprt	1,39	2,85	2,24	2,01	2,75	1,5
Rnf150	5,18	6,69	6,42	5,4	6,51	5,21
Dennd2d	1,17	3,15	2,69	1,54	2,68	1,36
Slc4a3	1,93	3,23	2,83	2,03	3,23	1,71
Hacd4	5,1	6,77	6,82	5,65	6,65	5,47
Asns	1,07	2,36	2,38	0,6	2,84	1,46
Aldh2	6,25	7,63	7,53	6,2	7,57	6,31
Chst1	5,05	6,54	6,86	5,62	6,65	5,38
Txndc16	5,89	7,44	7,29	5,96	7,04	5,95
Plau	6,71	8,27	8,38	7,08	8,44	7,35
Sptbn1	5,16	6,65	6,23	5,18	6,49	5,07
Trim55	0,1	1,31	1,54	0	1,08	0
AI662270	0,8	2,06	1,62	0,67	2,14	0,84
Acsl3	2,34	3,79	3,69	2,38	3,65	2,47
Trpm2	5,28	6,73	6,55	5,56	6,76	5,45
Blvrb	4,42	5,62	5,59	4,33	5,66	4,19
Emp3	5,49	6,67	6,59	5,2	6,61	5,28
Ccr2	1,9	3,47	2,94	2,01	3,33	2,11
Rtcb	7,58	8,96	8,9	7,66	8,71	7,6
Grin2a	2,42	4,42	3,38	3,13	4,12	2,76
Rab11fip4	2,16	3,66	3,21	2,2	3,52	2,2
Tmbim1	4,61	6,21	6,07	4,74	5,81	4,77
Pgbd5	1,51	2,38	1,73	1,17	2,47	0,69
Pqlc3	2,2	3,87	4,1	2,59	3,51	2,81
Cyb5r1	5,39	6,67	6,69	5,4	6,39	5,28
Ralgds	3,14	4,84	4,7	3,69	4,63	3,44
Chpf	1,31	2,58	2,08	1,17	2,63	1,55
Fbxl2	1,02	1,85	1,49	0,6	1,96	0,52
Fam161a	2,06	3,67	3,13	2,18	3,47	2,25
Dgat2	0,67	2,18	2,4	1,12	1,72	0,84
Adap1	5,09	6,3	6,19	4,99	6,37	5,02
Arpin	0,8	2,06	2,19	0,8	2,02	0,91
St8sia1	2,59	4,1	4,45	3,17	4,44	3,76
Cntnap5a	0,45	2,22	1,27	1,07	2,02	0,76
Wwp1	5,12	6,48	6,26	5,26	6,58	5,2
Kcnk10	0,37	2,11	1,65	0,73	1,82	0,61
Clec4b1	0	1,04	1,58	0,29	1,22	0
Gm36284	0,37	1,39	1,62	0,37	2,37	0,61
Ptprn2	2,08	3,51	3,18	2,48	3,49	2,22
Sigirr	0,53	1,76	0,93	0,6	1,88	0,12
Grm4	1,81	3,16	2,78	2,55	3,09	1,89
Samd12	1,54	2,71	1,9	1,31	2,52	0,76
Ppfibp1	3,1	4,35	4,12	3,16	4,43	2,93
Bcl2	3,01	4,36	4	2,74	4,03	2,62
P2ry2	1,22	2,35	2,45	1,17	2,51	0,97
Fam19a2	0,45	1,35	1,93	0,29	1,72	0,43
Ntrk2	2,64	3,87	3,27	2,57	3,91	2,72
Ccdc102a	4,03	5,39	5,31	4,1	5,15	3,76
Sstr4	1,17	2,62	1,99	1,12	2,43	0,84
Kctd17	2,72	4,09	4,1	2,85	4,2	2,87
Pvt1	4,49	5,73	5,48	4,53	5,78	5,02
Prr5l	4,41	6,23	5,84	4,78	5,97	4,94
Marveld1	3,11	4,55	4,43	3,19	4,27	3,47
Ppargc1a	0,1	1,31	0,73	0,67	1,4	0,12
Sh3rf3	0,37	1,57	0,66	0,37	1,66	0,23
Piwil2	0,37	1,67	1,36	0,2	1,88	0,76
Tenm4	1,72	2,74	1,93	1,12	3,09	1,46
Tmcc2	2,74	4,2	3,82	3,21	4,17	2,93
Rap2b	1,81	3,43	3,05	1,58	2,84	2,33
Tmem261	4,55	5,81	5,61	4,8	5,95	4,59
Hivep2	2,18	3,88	3,27	2,27	3,46	2,28
Ulbp1	0,97	2,36	2,43	1,17	2,07	1,36
Krt7	0,29	1,46	0,8	0,2	1,59	0,43
Fam131b	1,17	2,44	2,19	1,22	2,58	1,63
Rnf213	4,83	6,04	6,07	4,84	5,79	5,47
St8sia6	3,23	4,3	4,44	3,14	4,49	3,61
Hoxb4	3,21	4,78	4,43	3,24	4,14	2,81
Dok2	0,8	2,01	1,62	1,02	2,3	0,43
Synpo	0,73	1,73	1,93	0,37	2,12	0,69
Dnajb13	0,37	1,09	1,41	0,2	1,44	0,12
Ms4a6b	5,91	7,08	6,9	5,81	7,03	5,83
Gcat	2,4	3,17	2,73	1,78	3,05	1,86
Gla	3,25	4,31	4,45	3,21	4,57	3,44
Tmem176b	9,41	10,59	10,6	9,37	10,59	9,13
Syt8	0,91	1,67	1,96	0,45	2,12	0,76
H2-T-ps	0,67	1,88	1,83	0,91	2,04	0,69
Wdr54	0,8	2,26	1,96	1,31	1,72	0,76
Galnt3	4,13	5,66	5,24	4,15	5,34	4,19
Cd63	8,25	9,41	9,59	8,4	9,66	8,47
Nfasc	2,27	4,13	3,25	3,09	3,83	2,54
F730043M19Rik	1,98	3,51	3,02	2,27	3,15	1,71
6530402F18Rik	3,85	5	4,82	3,74	5,36	3,96
Csmd1	0,67	2,15	1,54	0,8	1,88	0,69
Ablim2	2,13	3,72	2,99	2,51	3,61	2,68
Celsr3	1,02	2,13	1,76	1,02	2,9	0,84
Adgb	0,45	1,67	1,93	1,07	1,4	0,52
Unc13a	1,75	2,89	2,55	1,72	3,3	1,5
Slfn3	1,84	3,43	3,3	2,06	2,91	2,6
Stard10	0,6	1,73	2,08	0,91	1,48	0,52
Dgkb	1,26	2,38	1,93	1,22	2,39	1,15
Dpf1	1,43	2,24	1,69	1,02	2,21	0,76
Lmtk3	3,03	4,17	3,46	3,24	4,34	2,92
Cox6a2	2,18	3,45	3,51	2,46	4,16	2,3
Lingo2	0,91	1,35	1,11	0,2	1,31	0,12
Lrguk	3,14	4,29	4,11	2,72	4,06	2,95
Dnajb14	4,93	5,92	6,16	4,77	5,95	4,77
Actr3b	1,22	1,57	2,31	0,86	2,02	0,34
Sorl1	5,65	7,04	6,87	5,71	6,75	5,81
Efr3b	1,39	2,8	2,31	1,58	2,75	1,96
Pqlc1	3,92	5,01	4,94	3,81	4,96	3,79
Lancl2	1,78	3,06	3,15	1,9	2,76	1,89
Mir8120	0,1	1,31	0,99	0,2	1,79	0,23
Cenpe	0,86	1,98	1,31	0,73	2,07	1,03
Osgin1	3,94	5,4	5,22	4,24	5,32	4,17
Grin1	3,63	4,71	4,32	3,55	4,7	3,49
Ifnar1	7,22	8,44	8,43	7,35	8,12	7,29
Slfn2	5,64	7,08	7,01	5,96	7,24	6,22
Limd1	3,63	4,75	4,96	3,68	4,81	3,85
Nrcam	1,98	2,96	2,34	1,81	3	1,71
Cadm2	1,81	3,08	2,29	1,75	2,91	2,14
Rtp4	5,7	7,16	7,34	6,15	7,48	6,74
A130077B15Rik	2,36	3,59	3,72	2,64	3,06	2,45
Slc44a1	5,3	6,34	6,35	5,22	6,33	5,03
Coro6	3,01	4,48	3,85	3,1	4,23	2,54
Akr1c13	1,47	2,15	2,19	0,6	2,32	1,03
Rcor2	0,67	2,33	1,83	0,91	1,69	0,52
Ppp3cc	2,59	4	3,16	2,53	3,72	2,45
D17H6S56E-5	6,13	7,36	7,4	6,23	7,68	6,51
Mvb12a	4,21	5,16	5,19	4,04	5,36	3,87
Mocos	0,1	1,82	1,36	0,2	1,31	0,52
Ntng1	1,22	2,53	2,19	1,39	2,35	1,03
Tmprss4	0	1,5	1,45	0,29	2,09	0,84
LOC108168196	0,2	1,31	0,8	0,2	1,44	0,23
Nyap2	1,51	2,87	2,45	1,98	3,01	1,71
Jdp2	4,27	5,64	5,13	4,36	5,49	4,33
Inf2	2,62	4,48	3,61	3,29	4,33	3,23
Rasgrp2	0,45	1,54	1,96	0,97	1,31	0,43
Ahrr	2,29	3,42	3,24	2,32	3,66	1,92
Tm4sf19	0	0,71	1,21	0,2	1,27	0,12
F3	0,97	2,15	1,9	1,65	2,28	1,03
Aifm2	0,86	2,22	2,05	1,02	1,85	0,91
LOC108167440	1,81	3,57	3,33	2,34	3,42	2,76
Lrrc4b	0,86	1,82	1,96	1,07	2,14	0,84
Stx3	1,75	2,9	2,65	1,9	3,04	1,63
Neurl1b	2,96	4,32	4,7	3,35	4,42	3,53
Fsd2	0	1,13	1,11	0	0,86	0
Capn2	3,11	4,25	4,36	3,14	4,01	3,11
Ier3	1,51	2,53	2,88	1,02	2,26	1,41
Coro2b	1,07	2,15	2,24	1,61	2,21	0,61
Clstn3	2,9	4,16	3,54	3,19	4,21	3,09
Disp2	2,06	3,2	2,78	2,36	3,33	1,96
Col20a1	1,51	2,6	2,08	1,12	2,21	0,76
Slc25a10	4,86	5,8	5,81	4,73	5,67	4,36
Irs2	5,13	6,46	6,29	5,6	6,18	5,22
H2-DMa	6,9	8,01	8,2	6,91	7,98	6,88
Foxp4	4,05	5,39	5,51	4,28	5,37	4,29
6030443J06Rik	0,53	1,64	1,27	0,45	1,99	0,76
Pard6g	0,8	1,18	1,62	0,1	1,03	0,12
Pparg	0	1,5	1,05	0,2	0,86	0
Dpp7	4,98	5,96	6,26	5,27	6,24	5,18
H2-K2	2,86	3,97	4,01	2,9	3,93	3,2
Sptbn4	0,6	2,06	1,65	1,26	1,72	0,61
Tbc1d8	6,6	7,88	7,56	6,68	7,78	6,72
Prkar1b	5,41	6,49	6,45	5,35	6,6	5,58
Plin3	4,92	5,95	5,93	4,86	5,69	4,85
C3ar1	8,25	9,18	9,43	8,2	9,34	8,27
Cd5l	1,07	1,7	2,36	1,02	2,17	0,61
Cd83	4,37	5,46	5,1	4,12	5,72	4,54
Gpr183	6,1	7,18	7,15	6,14	7,19	6,04
Lrtm2	1,12	2,15	2,24	1,43	2,21	0,84
Cep128	2,62	3,88	3,5	2,62	3,7	3
Agbl4	0,8	1,57	0,99	0,45	1,51	0,34
Il18bp	2,44	3,58	3,76	2,51	3,61	2,74
Sptbn2	1,39	3,02	2,51	2,13	2,87	1,79
Cysltr2	0	1,46	1,05	0	1,08	0,12
LOC105246186	0	1,04	1,45	0	0,74	0
Sez6l	2,85	4,15	4,01	2,96	3,83	2,93
Cfp	1,93	2,99	3,02	2,16	2,96	1,86
Gramd1b	5,18	6,27	6,06	5,31	6,39	5,15
Tpst1	4,51	5,59	5,6	4,39	5,58	4,7
Tmeff1	0,67	1,73	2,11	1,35	1,55	0,43
Zfp704	4,51	5,71	5,29	4,27	5,05	4,25
Diaph1	6,31	7,4	7,34	6,53	7	6,25
Ptger2	0,1	1,13	0,93	0	1,55	0,12
Brsk2	0,2	1,31	1,21	0,2	0,67	0,52
Ppargc1b	2,16	3,49	3,25	2,59	2,83	2,14
Ctla2a	0,2	1,04	1,62	0	1,27	0,69
Plin2	6,31	7,36	7,06	6,35	7,36	6,23
Lrfn4	0,6	1,64	1,49	0,29	1,91	0,61
Mpzl3	0,53	1,67	1,36	0,6	1,59	0,34
Gm34483	0,1	1,13	1,54	0,2	0,92	0,12
Fras1	0,67	1,76	1,21	0,67	1,69	0,34
Lgals3bp	9,12	10,2	10,11	9,1	10,55	9,61
Cabyr	0,97	2,63	1,99	1,26	1,59	0,76
Fam213a	2,08	3,43	3,76	2,36	3,25	2,88
Gm35113	0,53	2,15	1,11	0,45	1,44	0,43
Slc22a18	0,45	1,79	1,41	0,6	1,69	0,84
St7	3,52	4,66	4,26	3,56	4,89	3,68
Gstm1	2,87	3,91	4,08	3,09	4,22	3,03
Ppp1r1a	0,2	1,27	0,93	0,53	1,27	0,23
Rec8	0,2	1,35	1,21	0,29	1,36	0,43
Rbbp8	3,04	4,11	4,07	3,04	3,66	3,01
Coro7	6,41	7,57	7,48	6,44	7,49	6,44
Sap30	3,36	4,44	4,37	3,42	4,41	3,36
Nme4	2,16	3,52	3,2	2,23	3,21	2,08
Otub2	2,29	4,34	3,64	2,95	3,75	2,68
Gpd2	2,36	3,59	3,51	2,71	3,5	2,45
Cercam	2,9	4,05	3,69	3,09	4,35	3
Fpr1	0	1,04	1,16	0	0,92	0
Cxcl2	0	0,58	1,05	0,1	1,03	0
Lrfn5	1,58	2,22	1,76	1,26	2,28	0,69
Gm12250	5,05	6,63	6,35	5,29	6,39	5,73
Dbn1	1,78	3,01	2,34	2,11	2,83	1,36
Flt1	0,73	2,01	2,05	1,02	2,6	0,97
H2-M3	5,09	6,31	6,36	5,28	6,33	5,93
Rhof	1,93	3,04	2,86	2,03	3,15	2,52
Syt1	2,51	3,57	2,9	2,62	3,78	2,47
Hoxb7	0	1,04	0,87	0	1,03	0
Scn3b	0,73	1,79	1,69	0,8	2,21	0,52
Exoc3l4	0,73	2,3	2,4	1,84	2,61	1,46
Astn2	1,39	3,03	2,34	1,98	2,56	1,55
LOC108167568	0,45	1,85	1,45	1,17	1,79	0,76
Cdk18	1,02	2,06	2,29	1,22	2,37	1,79
Akap6	1,58	3,44	2,55	2,36	3,11	2,08
Gnptab	5,86	7,01	6,84	5,8	6,58	5,74
Gm33046	0,2	1,22	0,99	0,2	1,44	0
Col6a1	1,54	2,65	2,08	1,68	2,61	0,76
C2	0,67	1,85	1,69	0,45	1,22	0,76
Nrp1	6,63	7,82	7,69	6,67	7,45	6,97
Slc35e4	3,23	3,89	3,81	2,86	3,94	2,87
Wscd2	2,13	2,94	2,55	1,81	2,9	1,89
Cd300lb	1,31	2,3	2,36	0,86	2,24	1,46
Dna2	1,51	2,9	3,35	1,93	2,94	1,89
Mdk	0,97	2,5	1,96	1,47	2,84	1,41
Hapln2	1,17	2,33	1,65	0,67	1,93	0,97
Otud7a	1,07	2,06	1,76	1,07	2,12	1,21
LOC108167784	0,2	1,46	1,49	0,45	1,31	0,76
Vegfa	2,11	2,65	3,17	2,5	3,55	1,79
Gdap10	4,25	5,5	5,43	4,39	5,28	4,83
Wdr31	0,97	2,03	1,62	1,22	2,21	0,84
Grik2	2,5	3,36	2,76	2,32	3,7	2,08
Haao	4,73	5,94	5,95	4,96	5,72	5,09
Zfp810	4,05	5,22	4,72	4,33	5,17	4,19
Nr2f1	1,12	1,39	1,58	0,45	1,48	0,23
Srxn1	1,31	2,42	2,02	1,39	2,7	1,41
Gucy1a3	0,29	1,04	1,11	0,1	1,22	0
Slc4a10	0,6	2,06	1,11	0,67	1,69	0,97
Nphp4	0,53	1,57	1,21	0,97	1,91	0,34
Pilra	5,52	6,7	6,47	5,35	6,51	5,61
Plxna2	0,6	2,13	1,36	0,97	1,96	0,97
Rasgrf1	2,11	3,21	2,86	2,03	3,01	1,92
Cckbr	0,91	2,33	1,49	1,26	1,85	0,84
Irak3	3,48	4,45	4,14	3,62	4,53	3,27
Gm14379	0,1	1,13	0,73	0	1,08	0,12
Hdac9	5,01	6,13	6,21	5,15	6,04	5,23
Enpp4	5,16	6,28	6,24	5,29	5,81	5,34
Lmtk2	1,78	3,12	2,73	1,68	2,54	2,11
Igfbp4	5,48	6,34	6,57	5,64	6,58	5,6
Ccdc120	0,86	1,35	1,76	0,6	1,51	0,12
Tnfrsf11a	8,01	9,08	8,87	7,84	9,01	8,02
Foxn2	4,1	5,49	5,18	4,21	5,22	4,46
Kcnb1	1,17	2,74	2,11	1,78	3,15	1,67
Kcna1	1,35	2,65	1,96	1,72	2,3	1,31
Il10	0	0,94	0,73	0	1,31	0
Cd163	1,02	2,74	1,87	1,26	2,21	1,31
Atp10a	0,53	2,44	2,43	1,39	2,3	1,55
Syt6	1,93	2,97	2,93	1,75	2,93	2,38
Cnksr2	0,91	2,51	2,08	1,43	2,39	1,36
Icosl	7,08	8,25	8,06	7,05	7,86	7,18
Bcl6	5,22	6,22	6	5,12	6,32	5,44
Hmox1	5,38	6,41	6,25	5,44	6,51	5,47
Slit2	0,29	1,13	0,5	0,1	1,4	0
Mapkapk3	5,21	6,58	6,24	5,28	6,14	5,3
Incenp	4,28	5,62	5,42	4,53	5,28	4,48
Lrp6	6,46	7,27	7,4	6,43	7,41	6,78
Gm26947	1,75	3,28	2,85	2,36	3,11	2,17
Vgf	1,93	2,9	2,55	1,98	2,93	1,96
Prune2	1,12	2,35	1,73	1,51	2,07	1,03
Fblim1	6,64	7,59	7,53	6,81	7,76	6,65
P2rx4	5,43	6,34	6,56	5,36	6,24	5,41
Athl1	3,65	4,68	4,29	3,69	4,86	3,78
Cd274	4,31	5,26	5,2	4,28	5,27	4,36
Lncpint	2,03	3,23	3,35	2,42	3,48	2,7
Fam234a	5,37	6,07	5,93	4,92	6,1	5,12
Rapgef3	0,37	2,08	1,8	0,86	1,76	1,03
Spred3	2,38	2,99	3,21	1,93	3,91	2,28
Tbc1d12	4,39	5,21	5,56	4,27	5,1	4,2
Tnip1	5,91	7,1	7,1	6,17	6,93	6,33
Stat2	5,91	6,88	6,84	5,88	6,81	6,1
Spef2	0,6	1,76	1,58	0,67	1,59	1,21
Nlgn1	0,67	1,67	1,31	0,73	1,76	0,91
0610038B21Rik	0,45	1,31	1,27	0,37	1,36	0,12
Pgap3	3,09	3,73	3,9	2,83	3,78	2,66
Adcy1	3,04	5,01	4,49	3,77	4,76	3,86
Gm15743	0,86	0,99	1,36	0,37	1,36	0,12
E2f2	1,61	2,76	2,49	1,68	2,61	1,92
Igsf6	4,74	5,94	5,94	5,02	5,47	5,24
Ddx60	2,78	4,3	4,12	3,22	3,95	3,44
Eif4ebp1	4,11	5,04	4,67	4,26	5,05	4,07
Asap2	0,67	2,01	1,58	0,73	1,27	0,61
S100a1	1,26	2,6	2,47	1,81	3,09	1,67
Ncam1	3,2	4,39	3,45	3,11	4,1	3,11
Rassf3	4,21	5,29	5,13	4,71	5,3	4,34
Synj2	5,81	7,18	6,92	6,14	7,04	6,28
Npr2	1,39	2,3	2,13	1,51	2,58	0,97
Slc26a10	0,86	1,35	1,62	0,45	1,85	0,69
Hoxb6	0	0,94	0,93	0	0,8	0,12
Smim24	3,65	4,8	4,72	3,87	5	3,89
Akap3	0	1,18	0,5	0	0,97	0,12
Slamf8	5,94	6,82	7,13	6,18	7,14	6,51
Lbh	4,93	5,86	5,81	4,93	5,95	5,24
Ptrh1	0,29	1,39	1,36	0,45	0,74	0,43
Adgrb2	2,23	3,86	3,57	2,86	3,79	2,85
Pmepa1	6,74	7,73	7,64	6,68	7,5	6,42
Alk	0,37	1,31	0,8	0,6	1,51	0
Atad2	2,66	3,28	3,16	2,25	3,46	2,35
LOC108168817	1,31	2,62	2,24	0,91	2,28	1,36
Stab1	9,93	11,08	10,85	10,11	10,74	9,84
Marcksl1	2,01	3,2	3,05	2,27	3,24	2,52
Tmem231	2,08	2,85	3	1,84	3,26	2,14
Nfe2	0,1	0,71	1,31	0,45	1,18	0,23
Bcl2l14	0,29	1,35	1,27	0,45	1,27	0,34
2900005J15Rik	2,62	3,87	3,85	3,05	4,04	2,95
Nadk	7,98	8,92	8,91	8,01	9,05	8,16
Parp11	5,3	6,24	5,81	5,31	6,22	5,66
Iqcg	0,45	1,18	1,49	0,6	1,85	0,69
Slc15a3	7,59	8,51	8,2	7,5	8,78	7,63
Cacfd1	4,02	5,01	4,69	3,98	4,91	3,89
Mbnl2	2,8	4,33	3,89	3,21	4,11	3,55
Abcc8	0,37	1,31	1,11	0,53	1,4	0,23
Crlf2	6,46	7,03	7,11	6,19	7,07	5,79
Dusp1	2,27	3,16	3,49	2,27	3,21	2,45
B4galnt1	6,78	7,7	7,69	6,77	7,66	6,63
Tmem246	0,37	1,6	0,99	0,37	1,27	0,91
Olfr99	2,51	3,91	3,81	2,87	3,74	3,37
Atp8b4	0	0,94	1,11	0	0,46	0
Fbxl21	1,78	2,94	2,49	2,01	2,91	2,28
Stard4	1,95	2,51	2,38	1,31	3,04	1,55
Shank3	1,07	1,98	1,49	1,39	2,04	0,91
Tlr11	1,12	2,77	1,96	1,12	2,09	1,09
Cdc14b	3,21	4,52	4,52	3,65	4,39	3,87
Cecr6	0,37	1,22	1,36	0,45	1,48	0,52
Atp2a1	0,29	1,04	0,99	0,1	1,31	0,12
4930486L24Rik	1,9	3,08	2,94	2,16	3,15	2,17
Ank	7,21	8,05	8,2	7,35	8,11	7,1
Atp9a	2,38	3,91	3,24	2,59	3,43	2,7
Tnfaip2	5,69	6,61	6,62	6	6,41	5,72
Sgsm1	0,67	1,7	1,16	0,8	1,72	0,97
Fam135b	0,73	1,9	1,36	0,91	1,62	0,69
Cldn1	0,2	1,46	1,45	0,53	1,44	0,61
Tfec	1,65	2,51	2,51	1,58	2,68	1,15
Rims2	0,91	2,08	1,31	0,8	1,69	0,76
Mgl2	0	1,43	0,58	0,37	1,08	0,12
P4htm	1,78	2,9	2,34	2,06	3,04	2,02
Tspan32	4,7	5,79	5,8	5,17	5,84	4,87
Tub	1,07	2,13	1,76	1,22	1,99	1,03
Hspa4l	2,5	2,82	3,25	2,08	3,01	1,89
Znrf3	4,56	5,46	5,29	4,11	5,57	4,54
Gm1070	1,68	2,6	2,02	1,87	2,51	1,36
Atf5	1,39	2,26	1,96	1,07	2,54	1,55
Tlr1	6,43	7,65	7,46	6,57	7,37	6,77
Olfm2	1,17	2,03	1,41	1,02	1,91	1,03
Hlx	1,87	2,79	3,17	1,95	2,83	2,54
Rab11fip1	0	1,18	0,87	0	0,92	0
Tmem154	0,73	1,9	2,36	1,26	2,09	1,59
Kbtbd6	0,86	2,36	2,38	1,54	2,28	1,89
Ptprn	3,03	4,58	3,57	3,19	4,05	3,28
5430437J10Rik	0	0,88	0,8	0	1,13	0
Ahnak2	0,2	1,43	1,31	0,45	1,27	0,61
Svop	1,12	2,06	1,69	0,8	1,93	1,03
AA467197	0	0,44	1,27	0	0,92	0,12
Il10rb	10,03	10,9	10,81	9,97	11,04	10,09
Pigs	7,07	7,88	7,84	7	8,01	6,8
2010111I01Rik	3,06	4,83	4,3	3,69	4,6	3,71
Chrna4	0,8	1,79	1,54	0,8	1,69	1,09
Ptpru	1,31	2,22	2,13	1,35	2,41	1,46
Gm34780	0	0,99	0,87	0,2	0,8	0
LOC108168394	0,37	1,39	1,45	0,53	1,72	0,97
B430306N03Rik	4,69	6,17	6,19	5,33	6,39	5,55
Ets2	2,85	3,89	3,97	3,15	3,73	3
Ccrl2	4,32	5,41	5,67	4,64	5,57	5,18
Rftn2	0,91	1,79	1,83	0,67	1,62	0,97
Rassf7	1,35	1,93	1,93	0,91	1,51	1,03
Ipw	0,86	2,18	1,69	1,31	2,51	1,5
Fam129a	5,45	6,79	6,91	5,9	6,52	6,04
Cd22	5,59	6,8	6,78	5,89	6,76	5,92
Ptpn5	1,61	2,7	2,31	1,65	2,54	1,75
Srcin1	2,16	3,29	2,71	2,51	3,04	2,14
Mt3	2,57	3,18	3,47	2,92	3,56	2,33
Slc4a8	1,07	2,03	1,62	1,12	2,21	1,21
Relb	0,8	1,64	1,31	0,8	1,69	0,97
Tubb6	4,79	5,65	5,46	4,77	5,75	4,76
Kirrel3	1,17	2,53	1,9	0,91	1,91	1,03
Atp2b4	1,35	3,04	2,29	2,08	2,76	1,89
Ndst3	0,6	1,5	1,69	0,67	1,13	0,61
Nrros	3,8	5,16	4,97	4,32	4,96	4,14
Spock2	3,21	4,39	3,67	3,1	3,92	3,01
Slc17a7	3,59	4,67	3,96	3,64	4,47	3,47
Edil3	1,22	2,51	1,87	1,31	2,09	1,71
Ncapg2	1,43	2,48	2,31	1,02	2,04	1,55
Cyth1	5,74	6,74	6,55	5,66	6,25	5,68
Diaph3	1,02	1,54	1,54	0,6	1,93	0,69
Wwtr1	0,8	2,13	2,38	1,47	2,28	1,36
Slc7a1	4,75	5,56	5,34	4,7	5,87	5,15
Mybl1	1,65	2,58	2,47	1,78	2,84	2,3
Gm12216	3,51	5,1	4,69	3,82	4,55	4,29
Klhl34	1,93	3,29	2,71	2,53	2,78	1,86
1110008P14Rik	1,51	1,96	2,34	1,39	2,24	1,15
Dck	3,45	4,56	4,63	3,69	4,56	4
Tmem52	5,75	6,33	6,49	5,61	6,46	5,55
Chl1	2,4	3,57	3,24	2,77	3,29	2,28
Smc4	2,67	3,67	3,68	2,8	3,42	3,08
Prrt1	2,67	3,89	3,06	2,66	3,55	2,35
Smpdl3a	5,07	5,92	6,18	5,22	6	5,18
1700113A16Rik	1,98	2,96	2,9	2,51	2,87	2,08
A330023F24Rik	2,06	3,47	3,13	2,51	3,36	2,47
Eps15	6,5	7,33	7,39	6,37	7,13	6,48
Rell2	2,64	3,62	2,93	2,8	3,46	2,28
Adamts20	0,29	1,31	0,58	0,1	0,97	0,12
Atp2b2	4,28	5,71	5,03	4,72	5,29	4,46
2610507B11Rik	7,46	8,5	8,28	7,43	8,14	7,45
Rasgef1b	5,48	6,33	6,31	5,48	6,42	5,48
Gm32026	1,9	2,08	2,65	1,68	2,61	1,79
Acot9	4,99	5,66	5,81	4,93	5,87	5,3
Pfkfb1	2,06	2,65	2,49	1,65	2,19	1,59
Ace	0	0,64	0,99	0,2	1,48	0,34
Ypel4	0,2	1,13	0,58	0,1	0,97	0
Atp6v1g2	2,11	3,51	3,1	2,79	3,34	2,52
Crtap	6,1	7,01	6,85	6,02	6,95	6,17
Ankrd28	3,22	4,21	3,84	3,27	4,1	3,78
Pde8a	1,81	2,36	2,51	1,68	2,51	1,5
Gm20324	1,12	2,13	1,69	1,12	1,99	0,76
Tank	5,45	6,11	6,13	5,13	5,78	5,28
Lsamp	2,08	3,4	2,85	2,25	3	2,2
Tgfb3	0,37	1,39	0,87	0,73	1,55	0,52
Hectd2	2,51	3,48	3,2	2,59	3,36	2,52
Dhx58	5,16	6,24	6,29	5,4	6,1	5,64
Pea15a	7,61	8,4	8,33	7,54	8,37	7,46
Slc6a9	3,19	3,98	3,7	2,79	4,05	3,15
Cntn1	2,51	3,14	2,86	2,29	3,34	2,05
4931428F04Rik	1,22	1,88	2,29	1,43	2,02	0,97
Sema6b	4,54	5,37	5,19	4,38	5,24	4,42
Pnkd	2,08	3,14	2,93	2,36	2,76	1,92
Col4a1	0,6	1,43	1,45	0,67	1,18	0,34
Gad1	1,39	2,26	2,24	1,72	2,09	1,21
Gm5122	0,1	1,31	0,58	0,1	0,92	0,12
Ms4a4b	0	0,94	1,21	0,1	0,67	0,12
Wtip	4,28	5,11	5	4,02	4,82	4,16
Sv2b	1,43	2,42	1,83	1,58	2,26	1,09
Ccdc69	0,91	1,73	1,87	0,73	1,72	1,03
Nr1h3	0,97	2,35	1,87	1,07	1,69	1,15
Dock5	0,2	1,09	0,8	0,1	1,03	0,34
Smco4	1,72	2,33	2,53	1,43	2,61	1,89
Pcsk2	2,31	3,47	2,73	2,29	3,18	2,35
Gramd3	2,11	2,89	3,08	2,03	2,79	2,45
Dok4	0,8	2,44	1,69	1,47	1,88	1,03
Erc1	2,38	3,36	2,86	2,48	3,58	2,66
Ngfrap1	3,9	4,81	4,82	4	5,11	4,03
Sema6a	0,37	0,83	1,21	0,37	1,18	0,69
Usp13	0,1	0,71	0,93	0,1	0,92	0,34
Uck2	2,64	3,29	3,66	2,8	3,88	2,98
Hid1	0,53	1,57	1,31	0,8	2,02	1,03
Slc22a15	0,2	1,04	0,73	0,1	1,13	0,43
Creb5	1,47	2,44	2,21	1,12	2,3	1,55
Nefl	1,78	2,7	2,51	1,87	2,76	1,96
Slc45a1	1,81	2,36	2,08	0,97	2,07	1,21
9330159F19Rik	1,12	1,93	1,54	1,17	1,99	0,91
Syp	3,29	4,28	3,88	3,47	4,06	2,83
Nphp3	3,08	3,95	3,72	3,13	3,94	3,3
AA414768	1,93	2,7	2,11	1,75	2,63	1,86
Rph3a	1,68	3,02	2,65	2,01	2,78	2,25
Kifc1	2,5	3,26	3,68	3,04	3,71	2,9
Tmem132a	4,04	4,85	4,74	4,36	4,84	4,03
Tmem220	2,01	2,83	2,69	2,34	3,42	1,96
Cbarp	4,07	5,08	4,69	4,28	5,1	4,46
Gpld1	0,6	1,43	1,05	0,53	1,4	0,84
Pml	4,89	5,43	5,59	4,77	5,65	4,76
Fn1	0,37	1,43	1,11	0,53	1,36	0,76
Zfp395	4,75	5,39	5,56	4,66	5,47	4,63
Fstl4	0,67	1,54	1,27	0,91	2,04	0,76
Mfsd7a	4,21	5,37	5,19	4,58	5,12	4,41
Abtb2	1,07	1,79	1,36	0,8	1,62	0,52
Treml4	0,67	1,46	1,8	1,07	2,43	1,03
Enah	1,72	2,55	1,96	1,61	2,76	1,75
Rasa2	3,09	3,94	3,72	3,2	3,9	3,03
Tmem107	1,65	2,15	2,21	1,26	1,69	1,36
Gnao1	2,97	4,04	3,56	3,46	4,28	3,18
Mmp13	0	0,44	0,8	0	0,8	0
Kcnn1	1,47	2,08	2,29	1,75	2,35	1,26
Rbms1	4,13	5,1	4,91	4,07	4,58	4,03
Lmntd2	0,97	1,9	2,24	1,26	1,91	1,09
Man2a1	4,05	4,78	4,6	3,87	4,82	4
C5ar1	5,5	6,45	6,3	5,65	6,58	5,8
Snap25	2,34	3,29	2,91	2,57	3,46	2,47
LOC102637283	0	0,71	0,87	0	0,8	0,34
Kcnc1	2,85	3,62	3,21	2,64	3,39	2,3
Cit	2,08	2,9	2,85	2,16	2,88	2,02
Mpdz	0,1	1,09	0,41	0,1	0,92	0,23
Esyt1	6,48	7,35	7,14	6,51	7,29	6,45
Plpp2	4,89	5,7	5,73	4,91	5,64	4,9
Batf	2,23	3,3	3,16	2,53	3,56	2,62
Dock6	3,93	5,13	4,87	4,12	4,78	4,21
Alms1	2,67	3,66	3,1	2,46	3,5	2,9
Irak1bp1	1,47	2,48	2,51	2,01	2,56	1,71
Tlr2	5,84	6,63	6,73	5,84	6,57	5,85
Cacng8	1,75	3,06	2,26	1,58	2,49	1,89
Gfra2	0,67	1,35	1,31	0,53	1,31	0,52
Plekhg5	4,48	4,78	5,04	4,26	5,08	4,28
Prrt3	1,35	1,98	2,08	1,17	1,93	1,21
Negr1	0,73	2,11	1,73	1,35	1,72	0,91
Echdc2	0,1	0,99	0,58	0,29	1,03	0,23
Rnf149	5,18	5,98	5,98	5,12	5,74	5,34
E2f8	1,61	2,36	2,43	1,65	2,67	1,82
Anxa9	2,87	3,54	3,63	2,83	3,75	3,24
Pla2g16	3,75	4,61	4,14	3,54	4,51	3,83
Mmp2	4,83	5,59	5,65	4,93	5,23	4,79
Tap1	6,46	7,14	7,35	6,45	7,24	6,5
Habp4	3,66	4,44	4,44	3,24	4,31	3,66
Timp2	8,84	9,35	9,62	8,84	9,62	8,71
Adgre5	3,73	5,08	4,52	3,87	4,53	3,65
Asxl3	0,29	1,13	0,99	0,1	0,86	0,23
Sema7a	0,86	1,67	1,83	0,97	1,72	1,03
Msrb1	6,02	6,79	6,93	6,11	6,75	5,94
Ms4a8a	0	0,77	0,58	0	0,97	0
Emp1	0	0,83	0,73	0,2	0,29	0
Atg16l2	3,14	4,17	3,66	3,37	3,87	2,83
Kcnh3	0,37	1,39	1,41	0,91	1,72	0,61
Gpr84	7,36	8,23	8,14	7,47	8,33	7,86
Gabrb3	1,12	1,85	1,99	0,6	1,79	1,31
Fjx1	0,45	1,31	0,93	0,45	1,22	0,84
Dpep2	0,8	2,35	2,13	1,58	2,32	1,55
5031425F14Rik	1,02	1,96	1,69	1,26	1,91	1,15
Eef1a2	2,16	3,15	2,78	2,57	2,96	1,99
Chchd10	1,95	2,98	2,69	2,53	2,76	2,05
Mtcl1	1,39	2,38	2,11	1,9	2,45	1,63
Gria4	1,43	2,33	1,9	1,35	2,12	1,26
Rell1	2,71	3,66	3,52	2,75	3,15	2,17
4933432I03Rik	0,45	0,88	0,99	0,1	0,86	0
Rad51b	0,73	1,22	1,69	0,37	1,48	0,91
Arhgap19	2,38	3,07	3,45	1,98	3,14	2,62
Gatm	6,79	7,57	7,55	6,73	7,71	6,8
Samd4	1,65	2,24	2,36	1,51	2,43	1,59
Sept5	1,51	2,33	2,29	1,68	2,49	1,55
Foxd2	1,22	2,13	1,99	1,26	1,91	0,91
Oas1b	2,83	3,54	3,12	2,8	3,6	2,68
Pirb	2,64	3,49	3,49	2,74	3,44	2,78
Il3ra	1,72	2,82	2,93	2,53	3,32	2,2
Slc7a4	1,61	2,15	2,31	1,07	2,58	1,82
Myo16	0,53	1,43	1,16	0,6	1,31	0,23
Anxa4	5,45	6,29	6	5,52	6,26	5,58
Dennd1a	5,41	6,2	6,14	4,88	5,97	5,6
Nampt	5,01	6,16	6,01	5,27	5,99	5,39
Pcbp4	2,48	3,28	2,83	2,29	3,52	2,68
Slc11a1	9,23	10,03	9,9	9,27	9,98	9,14
Grm8	0,73	1,73	1,31	1,02	1,44	0,34
Lhpp	3,39	4,15	4,12	3,61	4,04	3,08
Plekho2	7,61	8,62	8,33	7,89	8,61	8,05
Thbs1	4,98	5,66	5,77	4,9	5,65	4,87
Sybu	0,67	1,43	0,93	0,45	1,22	0,23
Pbxip1	5,02	5,6	5,68	4,95	5,83	4,74
Nfkbia	7,35	8,47	8,04	7,67	8,24	7,49
Adam22	2,9	3,77	3,45	3,09	3,63	2,47
Nyap1	2,23	2,94	2,88	2,08	2,6	1,31
Arhgap33	2,08	2,89	2,49	2,38	3,11	1,86
Elavl2	0,8	1,54	1,62	0,97	1,44	0,76
Fam3c	5,98	6,67	6,69	5,83	6,64	5,93
Gadd45g	5,44	6,19	6,09	5,14	6,2	5,52
Epha10	0,91	1,7	1,21	0,91	2,02	0,61
Syne3	0,1	0,94	0,73	0,2	0,97	0,34
Cd24a	0,67	1,22	1,62	0,6	1,36	0,12
Tmem171	0	0,71	0,5	0	1,13	0
Ntrk3	2,4	3,59	3,1	2,61	3,35	2,6
Nrsn1	1,39	1,9	2,16	1,75	2,28	1,03
Dennd3	2,97	3,98	3,75	3,14	3,67	3,01
Itgb7	0,1	0,94	0,66	0,1	0,86	0,12
Fam49a	5,17	6,01	5,93	4,99	5,68	5,38
Dapk1	4,86	5,8	5,88	5,06	5,49	5,11
Ly6h	1,54	2,26	2,02	1,51	2,52	1,31
Vps13c	5,09	6,17	5,8	4,84	5,7	5,04
Gca	3,21	4,05	3,93	3,48	4,18	3,3
Mical2	2,66	4,37	3,36	2,87	3,45	2,58
Tmem106a	4,45	5,01	5,39	4,46	5,2	4,58
Rap2a	6,79	7,71	7,94	6,96	7,69	7,02
Ttyh2	4,89	5,52	5,77	5,09	5,64	4,76
Pdgfc	1,22	1,67	1,96	1,12	1,99	1,46
Nmnat2	0,2	1,73	1,36	0,6	0,92	0,61
Soat1	5,79	6,12	6,38	5,53	6,25	5,5
Tuft1	2,48	3,7	3,24	2,8	3,28	2,54
Fcgr2b	1,72	2,18	2,13	1,47	2,17	1,03
Gm19557	0	0,88	0,73	0,53	0,6	0
Adk	2,87	3,59	3,66	2,9	3,63	3,43
Psen2	5,57	6,53	6,35	5,77	6,49	5,89
Ephb2	0,86	1,35	1,87	0,29	1,62	0,91
Mmp12	0,1	1,43	2,08	0,73	1,22	0,69
Nrxn2	2,99	3,99	3,69	2,71	3,59	3,18
Dclk1	0,91	1,79	1,62	1,02	1,88	1,26
Scpep1	6,13	6,81	7,02	6,39	6,99	6,29
Gm29907	0,6	1,54	1,36	0,6	1,03	0,91
Kcnh1	1,58	2,65	1,8	1,35	2,21	1,5
Nfkbid	5,39	6,31	5,93	5,69	6,3	5,59
B230217C12Rik	1,47	2,33	2,11	1,39	2,02	1,36
Atp2a3	4,08	4,82	4,76	4,22	5,17	4,05
A930017M01Rik	0,8	1,18	1,16	0,45	1,03	0,43
Fam26f	4,12	4,85	4,86	4,04	4,89	4,23
Hpse	0,53	1,76	1,36	0,8	1,55	1,21
Rnf145	5,6	6,33	6,39	5,68	6,14	5,61
Ier2	3,51	5,1	4,21	3,5	4,25	3,84
Ptprz1	0,6	1,22	1,54	0,67	1,31	0,61
Car11	2,96	3,84	3,44	3,1	3,72	2,98
Tmem57	4,12	4,72	4,84	4,22	4,84	4,01
Trp53inp2	3,75	4,19	4,48	3,59	4,55	4,05
Sh3bgrl3	7,86	8,29	8,17	7,57	8,58	7,34
Syt14	0,67	1,43	0,99	0,6	1,36	0,91
Stim2	4,86	5,36	5,42	4,72	5,59	4,54
Raet1d	0	0,71	0,5	0,2	0,74	0
Dgkz	7,78	8,83	8,52	7,78	8,44	7,64
Plaur	4,77	5,79	5,75	5,08	6,2	5,25
Gna14	2,03	2,71	2,76	2,2	2,3	1,79
Nrg2	0,2	1,76	1,36	0,73	1,44	1,09
Dnah17	0	1,09	0,66	0,2	0,97	0,61
Mansc1	0,2	0,94	0,93	0,53	1,31	0,23
Slit3	1,54	1,93	1,65	1,12	2,12	1,21
Ndrg2	1,98	2,26	2,74	2,01	2,93	1,82
Insig1	3,9	4,41	4,64	4,04	4,81	3,81
Caprin2	1,31	2,11	1,96	1,35	2,07	1,5
Racgap1	3,61	4,21	4,44	3,71	4,59	3,79
Dok3	7,76	8,76	8,46	7,69	8,4	7,32
Strip2	0,6	1,39	1,31	0,8	1,27	0,43
Pdlim2	4,85	5,62	5,59	4,93	5,74	4,9
Snx8	6,56	7,53	7,41	6,69	7,37	6,7
Tmem132b	1,39	2,4	2,4	1,72	2,67	1,67
Gm14005	2,75	4,04	3,58	3,08	3,65	2,9
Capg	4,9	5,6	5,64	4,98	5,46	4,88
Ctsd	14,45	14,85	15,13	14,39	15,19	14,51
Resp18	0,6	1,22	0,99	0,53	1,22	0,34
Rims1	0,37	1,46	0,93	0,45	1,13	0,52
Rhod	0,1	0,71	0,8	0,2	1,03	0,12
Map3k5	5,02	5,67	5,47	4,53	5,44	4,73
Mab21l3	0	0,51	1,05	0	0,67	0
Aldoc	3,91	5,05	5	4,68	5,04	4,38
Taf1b	5,2	5,91	5,6	5,35	5,91	5,21
Kcnc3	1,54	2,36	2,02	1,87	2,26	1,46
Baiap2	4,02	4,83	4,23	3,92	4,66	3,91
Lmnb1	2,89	3,71	3,57	2,85	3,48	3,06
Rpgrip1	0,37	1,09	1,05	0	0,92	0,34
Cacna1a	4,52	5,32	5,27	4,61	5,31	4,64
Aplp2	6,97	7,7	7,61	6,92	7,55	6,83
Siglece	8,02	8,84	8,7	8	8,63	7,89
Kcna6	1,07	2,36	1,9	1,22	1,76	1,31
Gm30908	0,73	1,04	1,16	0,29	0,8	0,12
Ephb6	0,29	0,64	0,87	0,2	1,22	0,12
Rilpl2	3	3,83	4,15	3,32	3,99	3,51
Fkbp1b	1,39	2,11	2,19	1,68	2,09	1,15
Parvb	4,7	5,62	5,58	4,91	5,37	4,9
Nupr1	4,65	5,25	4,91	4,52	5,36	4,55
Gm2a	6,64	7,3	7,34	6,38	7,47	6,71
Plppr4	1,95	2,82	2,63	2,25	2,58	1,92
Cracr2a	4,82	5,58	5,62	4,91	5,79	4,98
Mta3	6,32	7,25	7,15	6,5	6,96	6,45
Ccdc88c	0,97	1,7	1,27	1,07	2,02	0,91
Aatk	3,38	4,26	4,18	3,5	4,17	3,48
Pla2g2d	0,2	0,88	0,93	0,37	0,53	0,12
Shcbp1l	0,67	1,7	1,49	0,8	1,48	0,84
Arfgef2	4,54	5,22	5,05	4,49	5,36	4,94
Plec	3,09	4,07	3,8	2,86	3,78	3,15
1190002N15Rik	5,55	6,24	6,31	5,79	6,25	5,57
Tpk1	3,11	3,82	3,66	3,08	3,8	3,22
9330179D12Rik	0	0,71	1,11	0	0,67	0
Jph3	1,93	2,7	2,31	1,98	2,96	2,02
Slamf6	2,8	4,01	3,98	3,3	3,92	3,45
Degs1	5,94	6,51	6,63	5,97	6,75	5,92
Gdf15	0,8	1,18	1,65	0,6	1,36	0,69
Net1	1,26	2,03	1,96	1,35	2,35	1,71
Cntn2	2,48	3,74	3,13	2,51	3,23	2,9
Dcstamp	0	0,64	0,73	0	0,2	0
Atcay	1,43	2,11	2,02	1,61	2,26	1,26
Pcdh1	2,62	3,34	3,31	2,89	3,33	2,45
Gm4951	0,1	0,83	0,73	0,45	0,8	0,12
Tctex1d4	0,1	1,27	0,99	0,53	1,48	0,61
Zfp462	0,73	1,18	1,16	0,45	1,13	0,34
Mpped1	0,6	2,26	1,62	0,97	1,62	1,15
Uhrf1bp1l	4,42	5,19	5	4,25	5,13	4,45
Endou	0	0,88	0,5	0	0,67	0
Pcdh11x	0,2	0,83	0,87	0,1	1,13	0,61
Mfsd12	6,26	6,95	6,83	6,24	6,92	6,08
Mtmr12	4,77	5,39	5,36	4,72	5,45	4,71
Acbd4	0,1	1,04	0,99	0,53	0,8	0,34
Pid1	4,4	4,84	4,74	4,07	5,08	4,17
Smim14	5,53	6,37	6,27	5,59	6,17	5,61
Arhgap18	4,83	5,8	5,82	5,15	5,48	5,11
Nr4a1	2,38	3,21	3,26	2,53	3,57	2,83
Tor3a	6,05	6,73	7	6,08	6,65	6,29
Tpd52	6,89	7,98	7,97	7,38	8,12	7,28
Rab13	0,8	1,35	1,45	0,97	1,76	0,61
Rdh5	2,27	2,97	2,55	2,36	2,91	2,17
Gm12589	0	0,58	0,66	0	0,8	0
LOC102632778	0	0,51	0,8	0,29	0,8	0,12
Bex2	1,61	2,63	2,71	2,03	2,84	2,14
Itpka	0,86	1,82	1,36	0,73	1,08	0,61
Nrgn	1,72	2,51	2,38	2,08	2,51	1,82
Tmem59l	2,48	3,29	3	2,67	3,14	2,28
Glb1	7,36	7,96	7,93	7,21	8,19	7,27
Kcnk2	0,1	0,51	0,99	0,45	0,8	0,12
Gm14461	0	0,51	0,66	0	0,67	0
Cd48	5,7	6,5	6,48	5,83	6,45	5,81
Epb41l1	1,87	2,51	2,43	1,81	3,14	1,75
Aim1	1,07	1,7	2,05	1,26	1,85	1,21
Amer2	2,6	3,24	3,08	2,55	3,41	2,87
Tmem35	0,1	1,22	0,87	0,37	1,08	0,76
Agpat4	1,98	2,65	2,63	1,98	2,83	2,35
Abca1	9,65	10,41	10,11	9,27	9,98	9,48
Mbd4	0,53	0,88	1,21	0,73	1,36	0,52
Sh2b1	7,12	7,93	7,66	7,16	7,8	6,95
LOC102638940	1,07	1,57	1,76	1,12	1,93	1,09
Adam9	5,64	6,67	6,44	5,76	6,4	5,77
March3	3,87	4,3	4,52	3,79	4,47	3,75
Gm32633	0,45	1,09	1,11	0,29	0,8	0,52
Plscr1	1,43	2,3	2,08	1,58	1,88	1,26
Bambi	1,35	2,13	2,19	1,51	2,24	1,75
Tppp3	0,37	1,46	0,93	0,86	1,22	0,52
Ovol2	0	0,64	0,22	0,1	0,67	0
Snap91	1,26	2,03	1,99	1,43	2,26	1,36
Dscam	0,45	1,09	1,11	0,53	0,86	0,23
Tlcd1	0,45	1,09	0,87	0,67	1,13	0,23
Sh3rf1	1,61	2,51	2,11	1,39	1,96	1,46
Morn1	2,11	2,76	2,61	2,06	2,73	2,38
Ppp2r5b	4,69	5,17	5,29	4,51	5,09	4,42
Myo9b	8,11	8,84	8,64	7,98	8,34	7,77
Kif1c	5,6	5,94	6,06	5,26	5,77	5,29
Robo1	0,6	1,18	1,27	0,67	1,31	0,61
4933424M12Rik	1,54	2,62	2,81	2,01	2,43	2,22
Eogt	5,83	6,55	6,55	5,89	6,37	5,99
Tmed1	3,44	3,82	3,74	3,04	4,13	3,13
Rhbdf2	6,24	7,14	6,89	6,34	6,87	6,07
Tnk2	1,47	2,7	2,53	2,27	2,63	2,02
5830416I19Rik	0	0,77	0,66	0	0,29	0,23
Osbpl3	1,68	2,22	2,43	1,65	2,32	1,82
Atpif1	0,53	1,04	1,16	0,1	1,22	0,84
Ebi3	5,5	6,16	6,29	5,68	6,14	5,5
Lmo7	0,29	0,94	0,99	0,29	0,92	0
Syt11	5,13	5,69	5,91	5,28	5,77	5,07
Ticrr	0,53	1,43	1,62	0,86	1,48	1,09
Rnase2a	0	0,83	0,66	0	0,46	0
Nudt1	2,67	3,16	2,88	2,55	3,2	2,22
Ero1l	4,74	5,58	5,42	4,79	5,35	4,83
Slco3a1	1,68	2,2	1,8	1,58	2,24	1,26
Adcy9	5,54	6,02	5,89	5,33	6,01	5,37
Sdr39u1	1,17	2,18	2,24	1,54	2,19	1,55
Cyp51	3,08	3,47	3,67	3,05	4,09	2,85
Fam229b	1,02	1,76	1,49	1,35	1,88	1,09
Tshz3	0	0,51	0,66	0,1	0,74	0
Ier5l	0,73	1,27	1,36	1,02	1,51	0,43
Mcoln2	0	0,64	0,66	0	0,6	0
Grk6	6,91	7,77	7,59	7,14	7,34	6,76
Hacd2	5,17	6	5,96	5,37	5,65	5,33
Kcnd2	2,2	3,07	2,85	2,13	2,67	2,33
Ctsb	11,91	12,41	12,56	11,8	12,63	11,91
Gch1	2,64	3,43	3,09	2,27	3,33	2,72
Tctn3	4,05	4,73	4,53	4,17	5,06	4,12
Pmm1	0,97	1,31	1,62	1,12	1,93	0,91
Ifit2	1,47	2,2	2,11	1,43	1,96	1,63
Spred2	5,51	6,42	6,1	5,47	5,93	5,5
Gys1	4,22	5,11	4,59	4,14	4,84	4,27
Susd6	6,65	7,31	7,28	6,66	7,6	6,74
Serpinb7	0	0,36	0,66	0	0,86	0
Egfl7	0,73	1,18	1,58	1,02	1,4	0,52
Csmd2	0,53	1,18	0,87	0,73	1,27	0,43
Sept9	3,85	4,42	4,69	3,79	4,4	3,64
Epha2	6,18	7,28	6,89	6,66	7,25	6,6
Slc5a6	4,61	4,91	5,02	4,37	5,05	4,18
Akr1c12	0	0,94	0,66	0,2	0,6	0
Gbp3	5,12	5,99	5,92	5,46	5,62	5,31
Ybx1	7,02	7,84	7,58	7,01	7,64	7
Rragb	0,29	1,22	0,93	0,1	0,6	0,34
Ndst1	5,57	6,85	6,62	5,94	6,58	6,02
C330027C09Rik	1,39	2,3	1,99	1,31	1,85	1,67
Igsf8	3,33	4,15	4,35	3,55	4,01	3,73
Stx1b	1,26	1,9	1,76	1,35	2,28	0,76
Gabra5	0,2	0,51	0,8	0	1,27	0,23
Chrna7	0,29	1,04	0,99	0,53	1,13	0,43
Gm31633	0,1	0,64	1,21	0	0,6	0
L1cam	1,17	1,79	1,58	1,07	1,79	1,21
Tec	6,32	6,72	6,69	6,07	6,65	6,05
Hcst	4,18	4,8	4,69	4,07	5,03	4,36
Pcnx	5,35	6,28	6,06	5,44	6,06	5,53
Inpp4a	5,84	6,35	5,96	5,51	6,09	5,47
Tmem123	7,34	8	7,96	7,42	7,69	7,36
C130050O18Rik	4,03	4,76	4,68	4,14	4,84	4,25
Pbdc1	2,87	3,5	3,4	2,99	3,61	2,83
Dscaml1	1,22	2,2	1,99	1,58	2,14	1,5
Cplx1	1,47	2,03	2,13	1,35	2,63	1,46
LOC102637873	0,53	1,57	1,21	0,91	1,22	0,61
Enkd1	2,86	2,96	3,2	2,44	3,1	2,49
Rhbdl3	0,67	1,22	0,73	0,37	0,97	0,34
Slc6a6	7,91	8,32	8,42	7,79	8,45	7,73
Agrn	2,87	3,69	3,41	2,96	3,61	3,12
Smyd2	3,09	4,21	3,79	3,19	3,83	3,19
Klhl13	3,09	3,8	3,55	2,93	3,47	2,81
Gabra4	1,07	1,7	1,58	0,86	1,51	0,97
Slc1a4	4,31	4,97	4,85	4,13	5,39	4,66
Mtrf1	3,93	4,48	4,28	3,88	4,51	3,81
Sesn1	7,18	7,58	7,6	6,98	7,46	6,96
Akap10	5,05	5,97	5,65	4,93	5,71	5,25
Shank1	1,87	2,79	2,11	1,81	2,51	1,86
Me3	0,29	0,94	0,87	0,29	1,31	0,23
Smagp	5,41	6,04	6,05	5,58	5,77	5,33
Stx16	7,18	8,19	7,78	7,39	7,81	7,11
Anpep	0,2	0,94	1,05	0,29	0,6	0,52
Rgs14	4,84	5,51	5,45	5,03	5,39	4,64
Cuedc1	0,86	1,35	1,11	0,67	1,27	0,12
Rep15	0,2	1,09	0,87	0,67	0,97	0,34
Pdgfa	5,35	6,08	6,04	5,43	6,02	5,42
Epb41l3	4,64	5,47	5,3	4,88	5,72	4,87
Asic4	0,73	1,18	1,16	0,53	1,13	0,43
Stk17b	4,88	5,81	5,71	5,17	5,87	5,23
Gad2	0,2	1,13	0,5	0,2	0,8	0,34
Mcm9	4,35	5,33	5,24	4,66	4,87	4,62
Ift43	1,87	2,42	2,47	1,84	2,65	2,05
Cadm1	7,82	8,65	8,67	8,03	8,5	8,07
Fcna	0,6	1,04	1,05	0,45	0,97	0,23
Ccdc171	1,12	1,76	1,69	1,17	1,88	1,36
Tmem191c	1,31	1,67	1,65	1,07	2,07	0,76
Cacnb1	1,12	1,93	1,8	1,47	2,45	1,31
Grina	8,86	9,46	9,35	8,9	9,49	8,84
Daam1	4,26	5,02	5,04	4,44	4,75	4,53
Slc16a10	4,51	5,12	5,07	4,44	5,31	4,5
Mtss1l	1,81	2,76	2,49	2,34	2,63	1,99
Hps5	6,47	7,08	7,06	6,46	6,93	6,57
Gaa	7,96	8,44	8,35	7,85	8,61	7,85
Retsat	4,32	4,91	4,92	4,61	4,89	4,29
Grid2ip	0,67	1,27	1,16	0,53	0,92	0,43
Gm20172	0,73	1,43	0,93	0,6	1,18	0,34
Ube2l6	4,68	5,27	5,19	4,58	5,42	4,7
Gm20594	0,29	0,44	0,93	0,1	0,86	0,34
Pilrb2	0,1	0,58	0,41	0	1,08	0
Cspg4	0,8	1,35	1,41	0,91	2,12	0,61
Sobp	1,07	1,96	1,62	1,26	1,66	0,69
1110001J03Rik	2,92	3,62	3,41	3,01	3,67	3,32
Slc8b1	6,15	6,96	6,83	6,29	6,88	6,42
Rap1gap	0,8	1,31	1,16	0,73	1,55	0,52
Arrdc2	4,47	5,47	5,16	4,66	5,06	4,58
Flot2	5,31	6,27	6,14	5,55	6,03	5,62
Sez6l2	4,05	5,09	4,7	4,28	4,73	4,11
Wnt7b	0,37	0,88	0,99	0,29	0,97	0,52
1700007L15Rik	1,26	1,85	2,02	1,65	2,39	1,46
Galnt7	6,56	7,28	7,12	6,29	7,13	6,51
Ptprc	7,19	7,63	7,7	7,02	7,72	7,11
Xist	9,63	10,52	10,31	9,78	10,4	10,09
Egr2	0,37	0,99	0,66	0,2	1,18	0,52
Dclre1c	6,9	7,72	7,68	7,12	7,51	7,2
Fstl5	0,45	1,22	0,8	0,67	1,13	0,52
Tomm7	4,65	5,02	4,93	4,42	5,07	4,2
Klra17	0	0,58	0,5	0	0,8	0,12
Eid1	1,26	1,5	1,73	0,73	2,09	1,15
Gltp	6,03	6,27	6,31	5,65	6,2	5,7
S1pr1	7,76	8,29	8,53	7,73	8,34	7,53
Atp2b3	2,95	3,82	3,35	3,01	3,49	2,78
Ltk	0	0,58	0,22	0	0,67	0,12
Ptprj	8,83	9,27	9,17	8,54	9,3	8,67
Cask	2,11	2,97	3,24	2,51	3,05	2,72
Slc35d2	2,99	3,79	3,92	3,25	3,82	3,43
4833419F23Rik	0,91	1,27	1,27	0,67	1,69	0,69
Gpsm2	0,2	0,51	0,8	0,2	1,03	0,34
Slc6a1	3,68	4,57	4,2	3,82	4,27	3,53
2610020H08Rik	1,02	1,54	1,62	0,91	1,69	1,15
Atp6v0d2	0	0,71	0,32	0,2	0,6	0
Ak5	0,29	0,88	0,8	0,37	0,86	0,12
Kif7	0,67	1,46	0,93	0,53	1,18	0,61
Spryd7	3,51	4,44	4,08	3,83	4,23	3,65
Mex3d	5,35	4,99	4,77	5,37	4,77	5,22
Usp6nl	4,66	3,78	3,85	4,2	3,87	4,43
Cds2	9,32	8,7	8,69	9,28	8,41	9,25
Scaf11	5,76	5,17	5,33	5,56	4,86	5,72
Map4k5	6,36	5,77	5,93	6,43	5,57	6,16
Rgs10	10,05	9,37	9,5	10,11	9,53	10,1
Tmod3	4,4	3,79	3,85	4,49	3,79	4,17
Tspan33	5,53	4,86	4,94	5,51	4,98	5,34
Slc25a45	8,55	7,88	7,74	8,41	7,78	8,16
Slco2b1	11,3	10,5	10,57	11,1	10,44	11,1
Cpox	5,26	4,53	4,73	5,15	4,39	5,13
Rgs2	9,67	9,18	9,3	9,77	9,04	9,77
Plekho1	9,42	8,84	8,84	9,45	8,69	9,19
Bckdha	7,74	7,14	7,07	7,69	6,77	7,59
Vapa	6,81	6,24	6,43	6,82	5,97	6,51
Pear1	5,72	5,1	4,98	5,77	5,3	5,62
Bin1	11,45	10,81	10,7	11,34	10,75	11,36
Akr1b10	5,78	5,17	5,18	5,76	5,22	5,79
Mef2d	4,01	3,41	3,76	3,84	3,45	4,27
4930447M23Rik	2,77	2,08	2,16	2,86	2,24	2,62
Mex3a	1,87	0,51	1,05	1,61	1,03	1,5
Gata2	0,67	0,1	0	0,73	0,2	0,34
Mdp1	4,58	4,14	4,49	4,74	4,04	4,76
Shb	4,59	4	3,94	4,52	4,2	4,72
Zfpm1	7,17	6,5	6,59	7,23	6,56	7,08
Wdr78	1,17	0,77	0,41	1,07	0,53	1,21
Pld1	8,65	8,21	8,08	8,78	7,78	8,58
Eif4g2	8,34	8,07	7,86	8,5	7,9	8,53
Ebf3	4,42	3,83	4,03	4,92	4,13	4,59
Eefsec	5,53	4,87	4,93	5,66	4,93	5,45
Chsy1	8,46	8,31	7,84	8,79	7,96	8,58
Nmi	4,49	4,22	4,14	4,81	4,04	4,74
Fzd4	6,67	5,63	5,64	6,23	5,63	6,26
Foxk2	7,08	6,46	6,46	7,07	6,35	7,08
Arl15	4,64	4,17	4,1	4,79	4,35	4,84
Usp21	7,02	6,53	6,37	6,73	6,23	6,97
Pnpla8	5,14	4,53	4,62	5,13	4,5	4,98
Sik2	4,2	3,73	3,67	4,31	3,69	4,41
Hpgds	9,49	9,15	8,92	9,81	8,91	9,55
Hcfc2	4,79	4,12	4,43	4,72	4,1	4,68
Ypel2	5	4,04	4,46	5,07	4,37	4,8
Csrnp2	4,71	3,91	3,82	4,55	4,19	4,31
A830052D11Rik	1,39	0,77	1,05	1,17	0,53	1,41
Nxpe3	3,95	3,68	3,64	4,23	3,57	4,28
Ppp2ca	9,23	8,61	8,81	9,28	8,47	9,01
Sla	8,61	8,26	8,4	8,93	8,34	8,98
Fam102b	8,98	8,12	8,26	8,79	8,43	8,89
Clstn1	9,32	8,67	8,69	9,4	8,53	9,16
LOC105245439	4,25	4,02	3,75	4,6	4,1	4,67
Man1a	7,22	6,9	6,65	7,31	6,7	7,34
Cnot8	7,73	7,19	6,97	7,68	7,04	7,52
Apool	4,12	3,79	3,9	4,43	3,59	4,58
Ubac1	4,93	4,42	4,81	5,13	4,4	5,04
Zcchc14	5,29	4,75	4,78	5,38	4,69	5,45
Zfp36l3	1,26	0,83	0,58	1,75	1,03	1,41
Arhgap5	7,75	7,02	7,1	7,72	7,22	7,95
Smad3	8	7,57	7,21	7,63	7,22	7,87
Rasgrp3	7,11	6,59	6,48	7,16	6,34	7,04
Man1a2	6,82	6,46	6,22	6,85	6,13	6,94
Senp6	4,41	3,96	3,51	4,12	3,48	4,14
4933411K16Rik	2,86	2,28	2,21	2,5	2,14	3,16
Kdm2b	4,03	3,42	3,45	4,06	3,35	3,9
Gm6402	2,44	2,13	2,08	2,8	2,24	3,05
Fkbp9	4,86	4,24	4,53	4,85	4,21	5,08
Klhl36	5,9	5,54	5,28	6,09	5,22	5,87
Eid2b	3,82	3,18	3,25	3,81	3,09	3,68
Fzd8	0,86	0,19	0,41	0,91	0,1	0,76
Btbd3	5,03	3,68	3,83	4,43	3,83	4,18
Gm6277	5,63	5,01	4,69	5,54	5,13	5,96
Naaa	5,59	5,03	5,28	5,87	4,9	5,68
Hk1	4,79	4,02	3,97	4,65	3,98	4,38
Tbc1d16	7,83	7,1	7,11	7,77	7,14	7,61
Tal1	5,49	5,14	4,95	5,59	4,91	5,69
Glul	9,3	8,33	8,64	9,04	8,5	9,13
Bach2	6,17	5,58	5,71	6,23	5,52	6,41
Snx10	6,27	5,59	5,85	6,23	5,61	6,05
B130006D01Rik	4,28	3,82	3,89	4,5	3,95	4,99
Pitpnc1	6,93	6,28	6,27	6,94	6,28	7,13
Lpp	5,53	5,18	4,88	5,38	4,85	5,59
Bard1	2,23	1,76	1,8	2,42	2,14	2,68
Mertk	7,7	7,02	7,31	7,85	7,06	7,69
Cdkl4	1,78	0,94	1,27	1,9	1,4	2,02
Slc46a3	6,32	5,64	5,89	6,3	5,68	6,44
Ppp2r1b	6,68	6,1	6,26	6,85	6,16	6,82
Ryk	4,79	3,68	3,96	4,43	4,09	4,57
Gclc	6,42	5,96	5,76	6,54	5,6	6,37
Nr1d2	6,93	6,23	6,46	7,29	6,63	7,11
Frat1	4,37	3,61	3,72	4,38	3,81	4,23
Hhex	7,21	6,54	6,59	7,11	6,5	7,27
Trio	8,75	8,22	8,18	8,84	8,05	8,97
Efna5	1,51	0,71	0,8	1,07	0,97	1,46
Trp53cor1	3,58	3,21	2,76	3,48	2,88	3,64
Gm11827	0,91	0,1	0,22	0,97	0,53	0,84
Prps2	5,9	4,93	5,09	5,76	5,3	5,64
Natd1	6,13	5,46	5,52	6,23	5,44	5,86
Tanc2	10,56	10,09	9,98	10,74	10,15	10,94
Bmi1	5,21	4,57	4,71	5,34	4,35	5,13
Arcn1	6,66	6,34	6,57	7,01	6,12	7,01
Map3k9	6,42	5,57	5,68	6,28	5,76	6,33
Ctnnal1	3,91	2,83	3,35	3,73	3,01	3,69
Mapk12	0,53	0	0,22	0,8	0,1	0,91
Elmo1	9,12	8,4	8,33	9,08	8,42	8,97
Il6st	9,55	8,89	8,85	9,43	9,26	9,59
Snx29	7,67	7,07	7,2	7,79	7,12	7,8
Pkp4	5,36	4,99	4,67	5,62	4,82	5,51
Gm3325	2,42	1,79	1,54	2,38	1,72	2,35
Rasal2	4,64	4,19	3,66	4,6	3,94	4,57
Fam72a	3,43	2,96	2,85	3,49	2,65	3,66
Cdk5rap3	5,11	4,44	4,1	5	4,33	4,78
Pde1b	7,58	7,49	7,02	7,74	7,1	7,73
Fuk	3,67	2,8	3,1	3,41	2,91	3,61
Marcks	6,87	6,15	6,18	6,84	6,23	6,66
4933421O10Rik	3,24	2,28	2,57	3,22	2,75	3,2
Sv2a	5,5	4,8	4,66	5,94	4,86	5,41
Lpcat3	7,44	6,65	6,74	7,41	6,8	7,4
Ptpn12	4	3,16	3,25	3,85	3,31	3,91
Pik3c2b	5,22	4,5	4,18	5,07	4,73	5,16
Nck1	5,62	5,23	4,96	5,8	5,06	5,76
Pde3b	9,49	8,82	8,66	9,49	8,87	9,55
Fkbp11	1,26	0,36	0,12	1,02	0,38	0,91
Sardh	3,32	2,67	2,76	3,36	2,61	3,53
Rxfp1	0,67	0,28	0	1,02	0	0,69
Glis3	0,67	0,1	0	0,8	0	0,61
P2rx1	4,34	3,93	3,89	4,81	4,27	4,61
Srgap2	10,11	9,58	9,42	10,06	9,24	10,1
Vash1	5,31	4,46	4,63	5,19	4,49	4,91
Cdc42bpa	3,01	2,6	2,63	3,3	2,7	3,35
Fam167b	4,5	3,46	3,27	4,12	3,67	3,87
Amotl1	4,44	3,33	3,59	4,3	3,67	4,03
Pten	7,56	6,87	6,97	7,81	6,76	7,54
Rrp1b	6,37	5,68	5,5	6,29	5,59	6,09
8030442B05Rik	6,1	5,75	5,64	6,29	5,45	6,6
Oxct1	6,57	5,93	6,26	6,78	5,98	6,64
Tpgs1	4,98	4,26	4,33	4,93	4,18	4,47
Cep85l	5,4	5,08	5,07	5,75	4,95	5,78
Bcat1	1,98	1,27	1,58	1,87	1,31	1,99
Nbea	5,04	4,35	3,98	4,92	4,33	5,15
Lpin1	7,62	6,69	6,96	7,47	6,76	7,45
Lzts2	4,66	3,95	3,89	4,61	4,01	4,65
Adtrp	2,31	1,64	1,27	2,13	1,66	2,81
S1pr4	4,22	3,85	3,63	4,63	3,71	4,42
St3gal6	8,88	8,15	8,07	8,64	8,35	8,99
Pygm	3,43	2,03	2,8	3,67	2,68	3,44
Prkx	5,74	5,08	5,04	5,78	5,05	5,48
Ccl6	7,26	6,69	6,62	7,38	6,95	7,38
Tfpi	6,34	5,69	5,88	6,59	5,74	6,42
Sdccag3	7,04	6,69	6,34	7,03	6,33	6,76
Ppp1r13l	3,43	2,71	3,06	3,25	2,49	3,45
Abcg3	2,44	0,88	1,54	2,03	1,36	1,92
Slc16a1	4,8	3,93	4,19	4,72	4,07	4,78
Cfh	10,75	9,95	9,94	10,66	9,96	10,38
Arhgap31	6,9	6,21	5,93	6,61	5,93	6,48
Cib1	6,33	5,49	5,37	6,11	5,52	6,19
Irf2bpl	5,18	4,71	4,88	5,53	4,82	5,63
Tcp11l2	5,12	4,88	4,47	5,16	4,42	5,29
Med21	2,51	1,98	2,34	2,69	2,04	3,13
2810025M15Rik	5,26	4,55	4,11	5,39	4,54	5,09
Sft2d2	10,06	9,35	9,27	9,98	9,06	9,8
Ubxn2b	3,74	3,06	2,93	3,4	3,21	3,81
Iffo1	8,99	8,57	8,24	9,14	8,44	9,14
Tln2	6,21	5,48	5,4	6,21	5,63	6,16
Csnk1e	6,59	6,05	6,04	6,98	5,86	6,74
Mib2	8,99	8,39	8,28	9,08	8,16	8,65
Plxdc2	10,88	10,16	9,93	10,84	10,25	10,63
Neo1	4,06	3,07	2,49	3,81	3,11	3,8
Gm4943	2,27	1,96	1,69	2,69	1,36	2,38
Hhat	3,24	2,5	2,38	2,95	2,9	3,4
Ikzf2	2,01	1,31	1,27	2,01	0,92	1,92
Prkcq	2,13	1,64	1,54	2,57	1,76	2,38
9930021J03Rik	4,31	3,86	3,57	4,06	3,54	4,26
Zfyve9	3,7	3,29	3,06	3,79	2,97	3,95
D030028A08Rik	3,15	2,79	2,24	3,62	2,43	3,22
Mmgt1	5,18	4,66	4,47	5,01	4,27	5,22
Med12l	5,51	4,73	4,42	5,18	4,63	5,32
Snx6	6,39	5,93	6,16	6,78	6,01	7,03
Creb3l2	6,47	5,56	5,95	6,52	5,74	6,43
Osbpl11	7,7	6,88	6,94	7,54	6,76	7,59
Rab19	1,31	0,58	0,8	1,26	0,53	0,84
Rapgef5	8,92	8,37	8,23	9,02	8,29	9,06
Tfap4	4,17	3,89	3,82	4,62	3,91	4,61
Tmem128	5,24	5,08	4,97	5,66	4,95	5,75
Ephb3	4,19	3,53	3,43	4,25	3,61	4,4
Arhgef40	7,14	6,36	6,4	7,09	6,15	6,69
Cc2d2a	1,95	0,71	0,99	1,43	1,27	1,75
Smap2	9,63	8,74	8,85	9,55	8,86	9,58
Rhoq	7,19	6,46	6,74	7,32	6,34	7,22
Arhgef18	5,23	4,29	4,31	5,05	4,36	5,05
Slc25a37	2,96	2,22	2,38	3,1	2,37	3,12
2610528A11Rik	3,2	2,67	2,78	3,55	2,78	3,49
Akirin2	8,19	7,35	7,59	8,12	7,21	7,99
Otud7b	6,1	5,48	5,54	6,29	5,59	6,36
Acy1	5,65	5,02	4,75	5,48	4,46	5,49
Nradd	4,88	4,3	3,93	4,97	4,15	4,77
Large	7,75	6,97	6,96	7,71	7,01	7,64
Klf12	6,79	6,06	5,89	6,61	6,17	6,78
Fkbp7	4,41	3,54	3,46	4,05	3,33	4,17
Btbd17	1,72	1,04	0,58	1,78	1,22	1,41
Sppl3	7,53	6,96	7,31	7,71	6,84	7,93
Arglu1	6,1	5,8	5,75	6,81	5,56	6,53
Sipa1l1	5,71	4,93	5,33	5,71	4,74	5,72
Ccng2	8,73	7,98	8,01	8,82	7,97	8,64
Slamf1	4,02	3,14	3,38	4,1	3,47	4,27
Rab39	6,44	5,71	5,68	6,45	5,45	6,35
Rbm41	4,17	3,77	3,43	4,43	3,43	4,09
Ggps1	6,79	6,44	6,23	7,04	6,24	6,99
4933412E12Rik	3,76	2,87	2,81	3,57	2,63	3,32
Bin2	8,64	8,15	8,17	8,91	8,04	8,91
Rpa2	4,16	3,42	3,5	4,37	3,87	4,21
Kcnma1	4,88	3,84	4,11	4,83	4,43	4,9
Plxna4	5,91	5,01	4,91	5,6	5,08	5,77
LOC108167662	0,67	0,1	0,22	0,97	0,2	0,97
Flnb	5,56	4,85	4,49	5,25	4,53	5,29
Angptl7	5,19	4,02	4,57	5,08	4,34	4,97
LOC105246961	3,57	2,8	3,17	3,74	2,94	3,83
Plcl2	6,23	5,47	5,37	6,15	5,32	5,92
Frat2	3,31	2,57	2,76	3,32	2,52	3,15
Zfp358	6,36	5,8	5,6	6,43	5,33	6,18
Abcg2	5,5	4,56	4,66	5,41	4,72	5,35
Fam212a	8,35	7,75	7,55	8,36	7,59	8,17
Lbx2	1,43	0,64	0,99	1,43	0,67	1,55
Zfp532	5,83	5,04	4,98	5,81	5,15	5,65
Pik3r1	8,47	7,84	7,86	8,64	7,69	8,7
LOC108169124	1,72	1,13	0,99	1,58	0,6	2,02
Myl2	4,54	3,66	3,31	4,3	3,87	4,39
Shmt1	3,31	2,77	2,21	3,28	2,51	3,18
Exog	5,17	4,4	4,53	5,26	4,19	4,99
Galm	5,03	4,51	4,46	5,28	4,69	5,29
Klrd1	0,6	0,19	0,41	1,02	0,1	1,26
Ak6	2,11	1,31	1,62	2,01	1,13	2,45
Kctd12	7,38	6,68	6,61	7,37	6,44	7,55
Evi5	5,51	4,92	4,62	5,41	4,66	5,38
Hmga2-ps1	7,32	6,54	6,46	7,24	6,45	6,97
Golm1	10,25	9,46	9,47	10,3	9,5	10,25
Abl1	8,94	8,52	8,73	9,27	8,27	9,31
Acvr2b	6,03	5,43	5,3	6,16	4,94	6,06
Mpeg1	6,17	5,7	5,57	6,43	5,65	6,43
Epn2	5,43	4,65	4,69	5,46	4,58	5,38
Nrm	6,55	5,83	5,69	6,61	5,77	6,48
Gm36774	1,17	0,71	0,32	1,47	0,67	1,79
Arap2	4,12	3,18	2,65	3,8	3,05	3,83
Frmd8	6,06	5,13	5,23	5,91	5,07	5,93
Fhit	5,01	4,03	4,32	5,44	4,22	4,9
Bsn	4,35	4,07	3,3	4,85	3,87	4,66
Zfp652	7,23	6,75	6,33	7,04	6,19	7,15
Msrb2	6,49	5,7	5,49	6,24	5,44	6,09
Glrp1	2,2	1,7	2,13	2,71	1,91	2,7
Prickle1	2,85	2,22	2,08	3,08	2,07	2,88
Map4k4	7,8	7,06	6,87	7,63	6,74	7,67
Asb2	7,7	6,99	6,91	7,86	6,81	7,7
Gm684	0,91	0,44	0,66	1,58	0,38	1,21
Idh2	7,21	6,41	6,46	7,21	6,38	7,17
Ddx26b	6,67	6,24	6,2	7,03	6,05	7,22
Cmtm6	9,96	9,13	9,41	9,94	9,02	10,1
Scarb1	6,23	5,73	5,56	6,37	5,39	6,42
Gm16702	1,78	0,77	1,05	1,51	0,97	1,99
Mylip	9,07	8,49	8,2	8,93	8,19	9
Klf15	0,8	0,19	0,41	1,02	0,1	1,09
Dennd4a	7,66	7,29	6,96	7,76	6,95	7,77
Tbc1d4	4,56	3,93	3,55	4,43	3,74	4,66
Mettl7a1	5,87	4,95	4,82	5,66	4,71	5,36
Zfp691	6,21	5,39	5,51	6,31	5,38	6,03
Lactb2	3,76	2,96	3,25	4	3,12	3,94
Uggt2	1,54	0,83	0,73	1,65	1,03	1,67
Asap3	8,11	7,63	7,14	8,13	7,28	7,74
Naalad2	4,47	3,77	3,35	4,62	4,22	4,59
Lrig3	5,12	3,99	4,05	4,69	3,74	4,8
Plvap	3,49	2,68	2,31	3,46	2,61	3,4
Rab6b	6,51	5,76	5,86	6,74	5,73	6,57
Prpsap2	7,19	6,4	6,37	7,18	6,31	7,01
Tspan9	5,68	4,5	4,67	5,48	4,68	5,36
Olfr1034	0,67	0,1	0,12	0,91	0,46	0,97
Pafah1b1	3,63	3,36	3,48	4,2	2,97	4,17
Dip2b	8,51	7,57	7,67	8,33	7,77	8,49
Fam133b	4,1	3,67	3,98	4,51	3,67	4,49
Mb21d2	1,9	0,77	0,58	1,65	1,18	1,59
Magi1	6,32	5,22	5,4	6,24	5,94	6,25
Fkbp14	4,23	3,64	3,22	4,07	3,2	3,77
Cds1	8,02	7,2	7,28	8,02	7,06	8,14
2700081O15Rik	4,45	3,29	3,75	4,41	3,58	4,31
Pdk1	3,81	3,25	3,6	4,07	3,17	4,05
Ric3	4,93	4,16	4,27	5,09	4,41	5,4
Pbx1	4,22	3,76	3,31	4,09	3,3	4,14
A230056P14Rik	2,59	1,7	1,11	2,44	1,62	2,49
Usp24	6,15	5,31	5,35	5,88	5,19	6,13
Maged2	3,98	2,98	3,25	3,85	2,9	3,63
B4galt4	7,91	6,96	7,11	7,93	7,08	8,1
Rras2	4,81	3,52	4	4,7	4,19	4,92
Usp2	9,26	8,55	8,48	9,4	8,26	9,32
Sort1	7,7	6,66	6,55	7,03	6,44	7,43
Rbbp9	6,66	5,81	5,8	6,69	5,7	6,54
Fam131a	5,29	4,49	4,75	5,34	4,48	5,41
Fam91a1	6,17	5,27	5,83	6,26	5,4	6,29
Calm2	9,72	8,94	8,98	9,85	8,83	9,8
Irf4	4,88	4,01	4,05	4,97	4,14	4,91
Rdh12	1,17	0,28	0,22	0,86	0,46	1,36
Coro2a	6,39	5,41	5,39	6,28	5,16	6,1
4930487H11Rik	3,99	3,07	3,1	3,46	3,28	3,92
Prkg1	1,58	0,36	0,5	1,35	1,08	1,31
Kcnd1	7,9	6,78	7,23	8,09	7,07	7,83
Asb10	4,8	3,79	4,02	5,2	3,88	4,72
Clec4a4	1,39	1,18	0,58	2,08	0,86	1,75
Vprbp	5,12	4,37	4,56	5,32	4,35	5,25
Casp3	6,39	5,47	5,56	6,34	5,24	6,2
Tspan13	6,54	5,52	5,88	6,83	5,65	6,44
Lactb	5,48	5,12	4,62	5,64	4,55	5,46
Mlxipl	9,15	8,53	8,07	9,27	8,24	9,01
Efcab6	1,75	0,28	0,12	1,17	0,46	1,15
Klk8	6,13	5,1	5,41	6,23	5,25	5,76
Gm572	1,84	1,04	0,93	1,22	0,97	1,89
Mir17hg	3,35	2,82	2,71	3,58	2,61	3,64
Rilpl1	7,42	6,51	6,74	7,5	6,37	7,15
Gm7694	4,71	3,53	3,2	4,43	3,48	3,99
Naa35	6,74	5,7	5,93	6,77	5,87	6,55
Mmp23	3,76	3,02	3,16	3,87	2,76	4,03
Dapp1	7,31	6,41	6,54	7,3	6,31	7,11
Erf	8,86	7,79	7,98	8,68	7,7	8,6
Gspt1	7,53	6,82	7,1	7,7	6,83	7,93
Sh2d5	2,18	1,39	1,58	2,48	1,85	2,49
Cdk5r1	8,46	7,55	7,57	8,38	7,76	8,51
Vangl2	4,92	4,05	4,04	4,84	4,37	5,13
Stxbp5	4,44	3,83	3,73	4,64	3,73	4,76
Rec114	1,81	1,13	1,21	2,44	1,55	2,05
Kcp	1,95	1,5	0,87	2,01	1,03	1,86
Ltb	2,82	1,93	1,9	2,96	1,72	2,66
Ptprm	7,17	6,5	6,28	7,29	6,23	7,07
Fam171a1	1,68	0,77	0,66	1,54	1,03	1,86
Cry1	2,23	0,99	1,69	2,36	1,44	2,3
Maml3	6,67	5,7	6,12	6,64	5,78	6,41
Thrsp	6,34	5,34	5,37	6,25	5,54	6,23
Gpr34	10,25	9,43	9,68	10,36	9,37	10,32
Ablim1	4,73	4,31	3,71	4,69	3,82	4,7
Eef2k	7,62	6,37	6,7	7,27	6,5	7,4
Klhl7	5,56	4,64	4,67	5,54	4,48	5,67
Sox4	7,65	6,51	6,52	7,41	7,02	7,43
Srl	4,6	3,53	3,85	4,74	3,84	4,93
Dock9	7,25	6,55	6,19	7,32	6,33	7,26
Cbfa2t3	6,51	5,36	5,29	6,27	5,6	6,19
Marveld2	3,36	2,15	2,65	3,48	2,49	3,26
Rfx3	4,49	3,5	3,58	4,36	3,51	4,41
Chst7	6,28	5,53	5,62	6,53	5,67	6,53
Eepd1	6,17	5,51	5,25	5,87	5,26	6,17
Siglech	10,62	9,69	9,7	10,51	9,84	10,6
Lemd3	5,35	4,44	4,35	4,88	4,45	5,38
Hspb3	5,57	4,58	4,72	5,59	4,67	5,32
Cnn2	4,63	3,95	3,74	4,84	3,92	4,87
Thnsl2	2,36	1,7	1,58	2,55	2,21	3,01
LOC108167986	1,17	0,51	0,12	1,02	0,1	0,97
Afm	1,84	0,64	0,93	1,87	0,92	1,71
Ccdc85c	5,03	3,52	3,93	4,84	3,92	4,86
Add3	7,32	6,41	6,34	7,3	6,77	7,13
Cd101	3,86	3,25	2,81	4,15	3,59	4,15
Nr3c2	3,66	3,07	2,91	4	3,14	3,96
Nfia	7,29	6,31	6,33	7,24	6,35	7,26
Atmin	5,19	4,22	4,43	5,16	4,22	5,06
Gem	2,11	1,31	1,36	2,25	1,59	2,54
Zfp69	4,05	3,4	3,13	4,23	3,3	4,34
Khk	6,7	5,65	5,71	6,59	5,61	6,47
Rhob	11,05	10,13	10,16	10,94	10,03	11,18
Vopp1	2,46	1,39	1,31	2,18	1,36	2,28
Rbm38	6,92	5,94	6,01	7,12	5,62	6,91
Tead3	5,06	4,07	4,03	4,98	3,97	4,82
Tle3	7,83	6,87	6,89	7,82	6,88	7,75
Bhlhb9	3,39	2,44	2,38	3,33	2,72	2,98
Cxxc5	9,13	8,12	8,19	9,03	7,99	9,05
Itgb3	6,8	5,7	5,59	6,68	6,03	6,52
Atp6v0a2	7,79	6,81	7,21	7,83	6,84	7,71
Edem1	8,05	7,41	7,36	8,33	7,35	8,29
Pde4d	3,27	2,33	2,26	3,16	1,93	3,24
Zfp454	1,81	0,44	0,87	1,43	0,29	0,97
Narf	6,24	5,26	5,69	6,23	5,29	5,98
Zcwpw1	3,36	2,44	2,43	3,69	2,17	3,2
Pik3r5	8,26	7,19	7,41	8,16	7,03	8,07
Efnb1	4,93	3,73	3,7	4,7	3,82	4,68
Gm36529	1,39	1,22	0,8	2,01	0,46	1,82
Ceacam1	7,3	6,32	6,31	7,26	6,54	6,74
Ptgfrn	4,52	3,48	3,55	4,45	3,98	4,07
Fscn1	8,71	7,4	7,6	8,51	7,55	8,45
Pxk	6,43	5,58	5,74	6,56	5,45	6,56
Sema4b	5,08	3,78	4,02	4,79	3,88	4,86
Vis1	4,08	2,8	2,67	3,74	2,78	3,78
Bmp1	4,52	3,64	3,24	4,41	3,41	4,29
Qprt	2,48	1,57	1,8	2,64	1,48	2,58
Grrp1	1,58	0,19	0,12	0,86	0,6	1,09
Pim2	4,88	4,05	3,89	4,88	3,9	4,66
Zfp57	1,54	0,99	0,58	1,54	0,53	1,63
Sall3	8,38	7,33	7,4	8,54	7,49	8,33
Rab3ip	4,55	3,56	3,55	4,57	3,57	4,5
Pfn1	10,69	9,69	9,73	10,92	9,81	10,74
Gm30794	1,81	1,18	1,05	2,4	1,55	2,22
Ccdc8	3,48	2,92	2,73	3,68	2,49	4
Ldhb	7,51	6,39	6,72	7,58	6,5	7,46
Tcaf1	2,66	1,88	1,58	2,57	1,22	2,33
Parp16	2,97	2,4	2,24	3,27	2,12	3,22
Tspan18	4,93	3,81	3,94	5	4,27	5,41
Rab27a	7,32	6,37	6,43	7,49	6,6	7,45
Nav2	7,3	6,27	6,17	7,08	6,44	7,27
Fchsd2	7,84	6,83	6,77	7,74	6,84	7,88
Slc40a1	7,14	6,08	6,19	7,13	6,13	7,04
Neurl1a	5,23	3,94	4,52	4,96	3,91	4,9
Zbtb18	6,69	5,6	5,76	6,62	5,67	6,75
Ddit4	6,26	5,25	5,29	6,94	5,4	6,01
S100a10	1,68	0,94	1,11	2,27	1,36	2,14
Ccr6	3,91	2,89	3,06	3,68	2,91	3,94
St3gal2	6,62	5,67	6,2	6,91	5,83	7,1
Gm32645	4,15	3,09	3,08	4,05	3,87	4,63
Prkce	5,37	4,35	4,36	5,61	4,34	5,37
Stradb	3,22	2,74	2,73	3,73	2,6	3,79
Ocln	2,89	2,06	2,31	3,06	1,69	3,05
Adamtsl2	3,76	2,7	2,94	3,73	2,6	3,42
Iqch	0,73	0,28	0,12	1,12	0,1	1,15
Slc24a3	5,73	5,06	5,22	6,2	5,14	6,37
Mpv17l	3,28	2,73	2,76	3,82	3,09	4,18
Mras	6,18	4,86	4,98	6,06	5,26	5,72
Tmem144	6,2	5,17	5,32	6,22	5,19	6,31
Nid2	6,26	4,72	5,05	6,08	5,01	5,84
Agmo	7,37	6,44	6,42	7,49	6,5	7,54
Peg10	1,93	1,09	0,32	1,78	0,74	1,55
Tmem263	1,78	0,36	0	1,39	0,29	1,31
Dmrtb1	2,74	1,54	1,99	2,57	1,44	2,17
Ccdc62	2,44	2,3	2,05	3,2	1,99	3,05
Eno3	4	2,97	2,88	4	3,33	3,6
Adcy6	4,15	3,03	3,16	4,19	3,12	3,82
LOC102632541	0,91	0,19	0	1,22	0	1,03
Plpp1	7,02	5,77	6,05	7,14	6,46	7,19
Slc12a2	8,5	7,44	7,41	8,49	7,47	8,45
Afap1l1	7,17	6,42	6	7,41	6,12	7,03
LOC108167732	5,61	5,07	5,48	6,13	4,67	6,12
Spin4	1,39	0,28	0,32	0,6	0,38	1,36
Ppp1r9a	7,47	6,62	6,41	7,42	6,35	7,49
Tspan7	8,27	7,04	7,23	8,33	7,24	8,28
Dclk2	4,34	3,32	3,32	4,42	3,57	4,38
Slc38a9	3,7	3,64	3,1	4,15	2,94	4,2
Slc5a5	1,81	1,04	0,66	1,61	0,53	1,75
Serpine2	10,06	8,78	8,93	9,97	9	9,92
Dnaja4	3,8	2,87	2,71	3,95	3,2	4,23
Ppp1r26	2,48	1,54	2,19	2,86	1,62	2,64
5730435O14Rik	1,84	0,58	0,8	2,06	0,92	1,75
Whrn	8,96	7,98	7,8	8,8	7,57	8,86
St3gal5	7,95	6,79	6,95	7,96	6,88	7,84
Siglecg	1,98	0,58	1,05	2,16	0,92	1,79
Layn	4,07	3,21	3,36	4,28	2,93	4,36
Sparc	12,14	11,08	11,54	12,43	11,32	12,59
Adra2a	0,91	0	0	1,07	0,2	1,09
Cnrip1	4,68	3,59	3,56	4,77	3,8	4,5
Asph	9,47	8,42	8,51	9,61	8,71	9,63
Gadl1	2,62	1,5	1,49	2,42	1,44	2,58
Dnajc28	2,6	1,27	1,62	3,04	1,69	2,72
Apob	1,47	0,36	0	1,51	0,46	1,36
Eng	9,02	7,9	8,11	8,98	7,9	8,79
Lrrc1	2,4	1,31	1,27	1,93	0,53	2,38
Zfp354b	3,01	2,33	2,05	3,64	2,19	3,26
AI429214	2,8	1,67	2,21	3,55	2,07	3,12
Bnc2	2,16	0,83	0,32	1,81	0,86	1,92
Bmpr1a	4,84	3,57	3,79	4,77	3,74	4,83
Cdkn1c	4,33	3,18	3,31	4,51	3,11	4
Cmya5	2,25	1,13	0,66	2,23	1,13	2,66
Itgae	3,24	1,98	2,02	3,03	2,02	3,12
Ctnnd2	4,15	2,94	2,26	4,09	3,12	3,95
Prox2	3,98	3,16	2,76	4,14	3,05	4,17
LOC108168194	1,22	0,1	0,12	1,43	0	1,03
Nos1ap	5,97	4,91	4,85	6,12	4,56	5,89
Myadml2	4,27	2,93	3,27	4,25	3,15	4,22
Jup	7,24	6,14	5,81	7,28	6,09	7,18
Smim1	3,09	1,54	1,93	2,83	1,72	2,66
Sdk1	6,14	4,94	4,88	6,03	5,35	5,98
Gmpr	5,82	4,71	4,6	5,75	4,54	5,54
Tmem64	7,4	6,22	6,45	7,35	6,19	7,25
Mrc2	7,12	6,43	6,05	7,31	6,12	7,25
Nynrin	4,5	3,28	3,12	4,25	3,39	4,42
Snta1	5,43	4,28	4,6	5,73	4,21	5,37
Zfp697	4,19	2,98	2,11	4,12	3	3,82
Mical3	5,58	4,54	4,16	5,54	4,45	5,74
Ccdc149	2,18	0,77	1,11	2,27	1,18	2,45
Tpbgl	6,55	5,53	5,94	6,66	5,52	6,84
Zfp641	2,77	1,93	1,31	2,29	1,62	2,78
Lrrc75a	6,63	5,5	5,56	6,65	5,37	6,34
Ptpn14	1,26	0,51	0	1,72	0,1	1,21
Plcg1	6,59	5,42	5,57	6,58	5,31	6,43
Snn	8,96	7,51	7,75	8,65	7,63	8,77
Abcb4	5,7	4,87	4,6	5,89	4,71	5,95
Ncaph	2,5	1,35	1,36	2,53	1,44	2,78
Nudt12	2,08	0,88	0,93	2,36	1,22	1,75
Nhsl2	1,65	0,99	0,41	1,47	0,2	2,38
Postn	2,31	0,99	1,11	2,27	1,48	2,08
Ddah2	6,04	4,91	4,57	5,95	4,77	5,72
Zfp354c	4,45	2,63	2,8	3,96	2,94	3,98
Kctd12b	3,92	2,65	2,49	3,77	2,84	3,09
Bahcc1	4,96	4,06	3,41	4,77	3,64	4,86
Setbp1	2,44	1,35	0,73	2,51	1,31	2,6
Arvcf	7,41	6,35	6,17	7,4	6,21	7,22
Cecr2	1,54	0,19	0	0,6	0,1	1,31
Rab34	5,68	4,48	4,44	5,65	4,51	5,39
Utp6	3,08	2,51	2,51	3,65	2,3	3,76
Nat1	1,75	0,58	0,8	2,2	0,6	1,82
Armcx2	4,98	3,63	3,79	4,92	3,95	5,06
Zfp37	2,86	1,9	2,13	3,35	1,44	3,03
Arsg	6,15	4,73	4,73	5,94	4,62	5,92
Ets1	7,99	6,77	6,78	7,79	6,58	7,96
Ttc9	4,31	2,94	3,08	4	3,29	4,28
Numb	10,01	8,82	8,77	9,98	8,71	9,93
Zc3h12b	3,24	2,03	1,96	3,17	1,55	3,58
Adcy8	2,87	0,71	1,05	2,29	1,44	2,14
Picalm	7,82	6,83	7,24	8,23	6,53	8,1
Sgce	7,32	5,93	6,12	7,45	6,08	7,03
Col27a1	6,82	5,85	5,77	7,24	5,17	7,02
Sall1	8,19	6,75	7,25	8,17	6,93	7,97
D7Ertd443e	2,16	0,77	0,32	1,95	1,48	2,05
Dll1	3,09	1,88	0,73	2,83	1,62	2,7
Mpi	7,36	5,85	5,76	7,11	5,99	7,06
Adgra3	4,84	3,45	3,53	4,67	3,16	4,56
Palld	2,72	1,54	1,8	2,9	1,69	3,15
Arhgef25	2,75	1,54	1,16	2,79	1,66	1,96
Atp2c1	8,18	7,04	7,25	8,36	6,95	8,31
Gramd4	5,22	3,77	4,29	5,55	4,05	5,29
Cdca7	5,8	4,64	4,67	5,91	4,27	5,96
Fam13a	3,58	2,63	2,61	4	2,61	3,89
Icos	2,67	1,04	1,62	2,86	1,82	2,98
Gab1	6,06	4,92	5,13	6,28	4,6	6,15
Tet1	4,09	2,92	2,74	3,91	2,72	4
Gp9	5,18	3,68	3,82	4,94	3,65	4,86
Scube1	3,53	2,24	2,16	3,34	2,49	3,54
Cass4	6,46	5,35	5,13	6,44	5,01	6,37
Engase	6,83	5,52	5,61	6,97	5,51	6,62
Tiam1	6,1	4,48	4,7	5,83	4,69	6
Lrrc39	4	2,71	2,97	4,17	2,87	4,25
Zfp354a	4,25	2,77	2,91	4,22	2,94	3,73
Bend5	2,71	1,04	1,36	2,51	1,85	2,72
Atp8a2	9,02	7,83	7,95	9,26	7,96	9,55
Nav3	8,48	7,11	7	8,32	7,08	8,38
LOC108167997	1,75	0,88	0,93	2,23	1,18	2,76
Unc5cl	2,89	1,57	1,96	3,23	2,14	3,28
Eid2	3,33	2,24	2,83	3,53	2,17	3,58
Fut10	4,56	3,66	3,53	4,88	3,34	5,07
Adgrg1	10,36	8,68	8,9	10,1	8,89	10,24
Arhgap32	3,73	2,42	2,36	3,48	1,96	4,04
Rab4a	2,62	1,04	1,45	2,69	1,27	2,42
Atp8b1	4,04	2,68	2,13	4,08	2,76	4,21
Slc1a3	6,68	5,41	5,55	6,96	5,81	7,08
Gm29927	1,81	1,04	0,73	2,46	1,44	2,4
Nrarp	5,78	4,47	4,53	6,03	4,56	5,89
Cx3cr1	11,69	10,23	10,34	11,32	10,31	11,67
Ackr3	2,18	0,71	0,12	2,03	0,97	1,89
Bcl9l	8,09	6,88	6,8	8,3	6,67	8,15
Cdc42ep1	2,01	0,64	0,32	1,72	0,29	1,31
Dpy19l3	3,61	2,15	2,53	3,54	2,24	3,78
Gimap9	2,42	1,13	0,99	2,64	1,03	2,42
Clec4a3	4,58	3,57	4	5,01	3,16	5,3
Efnb2	3,24	1,54	1,76	3,2	2,14	3,05
Prkca	6,2	4,76	4,58	6,09	4,92	6,17
Duoxa1	3,53	1,6	2,26	3,63	2,49	3,64
Pnma2	1,95	0,77	0,41	1,65	0,29	1,86
Jam2	7,22	5,72	6,08	7,22	5,8	7,11
Ecscr	9	7,48	7,58	9,13	7,66	8,96
Tppp	7,05	5,17	5,42	6,74	5,32	6,73
Sema4g	8,71	7,31	7,29	8,87	7,23	8,6
Actn1	5,9	4,24	4,74	6	4,44	5,9
Casc4	2,55	0,88	1,11	2,93	1,27	2,52
Stk26	1,95	1,39	0,58	2,16	0,74	2,25
Igf1r	6,15	4,61	4,61	6,07	4,69	5,86
Ccnjl	1,75	0,28	0,32	1,78	0,8	1,21
Nbl1	3,63	1,85	2,08	3,54	2,24	3,4
Jam3	5,31	3,86	3,7	5,33	3,93	5,3
Gm30789	4,6	2,94	3,63	4,94	3,23	4,71
Gm3134	5,47	3,98	4,22	5,45	4,02	5,56
Slc2a5	7,67	6,44	6,79	7,95	6,47	8,07
Dlc1	2,77	1,27	0,93	2,36	1,08	2,58
Gabbr1	6,88	5,64	5,38	6,87	5,18	6,75
Hsf2bp	4,17	2,68	2,88	4,15	2,63	3,93
Lamb2	5,3	3,8	3,9	5,1	3,68	5,27
Ppm1e	2,99	1,09	0,8	2,38	0,86	1,63
Kcnk12	5,21	3,49	3,46	4,94	3,46	4,72
Npl	6,8	5,28	5,24	6,68	5,34	6,79
Nova1	3,19	2,01	1,87	3,38	1,48	3,48
Tgfa	6,74	5,23	5,56	6,76	5,22	6,57
Fgf11	4,94	3,48	3,96	5,46	3,49	5,04
Gm15880	2,01	0,44	0	1,65	0,53	2,02
Lgi4	4,88	2,93	3,3	4,81	3,58	4,41
Elavl4	3,79	2,55	2,21	4,14	2,9	4,39
Nrep	4,27	1,9	2,93	4,09	2,58	4,08
P3h2	8,34	6,73	6,87	8,46	6,89	8,55
Prox1	4,8	2,93	3,25	4,3	2,88	4,45
Rtn4rl1	8,9	6,97	7,23	8,75	7,17	8,55
Ccl9	8,04	6,68	6,65	8,26	7,02	8,41
Hnmt	5,23	3,66	3,7	5,58	3,7	5,3
Ncs1	4,21	2,62	2,65	4,05	2,94	4,23
Mycl	6,4	4,55	4,79	6,33	4,94	6,01
Plcl1	6,58	5,48	5,3	7	5,43	7,02
Adamts16	5,73	4,09	3,84	5,52	4,37	5,69
Yes1	4,24	2,3	2,83	4,09	2,63	4,21
Kng2	2,31	0,88	1,05	2,53	0,8	2,64
Tbx19	2,03	0,51	0,8	2,46	1,13	2,62
Gprasp2	0,97	0,36	0,22	1,93	0,1	1,79
Satb1	4,48	2,35	2,85	4,25	2,63	4,23
Myo6	3,76	2,82	2,38	4,49	2,81	4,42
Gm36365	8,5	6,8	6,72	8,45	6,79	8,31
Mmp15	4,1	2,44	1,8	4,12	2,47	4,07
Gpd1	5,22	3,98	3,54	5,24	3,39	5,06
Gimap1	3,88	1,7	1,96	3,63	1,96	3,64
Vangl1	2,86	0,51	1,41	3	1,79	3,24
Thsd1	3,53	1,85	1,93	3,46	1,66	3,54
Farp1	4,61	3,14	2,73	4,52	2,88	4,69
Zfp827	4,36	2,68	2,55	4,42	3,14	4,74
Tmem204	6,41	4,35	4,67	6,05	4,35	5,94
Slc36a2	2,85	0,88	1,05	2,74	1,79	2,42
Apobec2	1,9	0,28	0	1,93	0,1	1,89
Gimap6	4,65	2,86	3,02	5,1	3,07	4,77
Klhl3	5,83	3,87	3,65	5,64	4,03	5,64
Perp	2,25	0,88	0,73	2,69	1,08	2,68
Mgll	5,15	3,26	3,33	5,07	3,22	4,95
Gm10790	7,17	5,57	5,38	7,24	5,4	7,19
Slc16a9	2,59	0,51	0,5	2,36	1,31	1,89
Mmp28	2,66	1,13	0,8	2,61	0,74	2,42
Cux2	4,46	2,63	2,05	4,23	2,41	4,15
Klhl38	4,32	2,58	3	4,49	2,58	4,45
Tmc7	7,38	5,3	5,22	7,1	5,11	7,14
Slc39a12	4,59	2,73	2,88	4,64	2,58	4,66
Zswim5	3,21	1,22	1,21	3,14	1,48	2,47
Upk1b	8,24	5,79	6,26	7,96	5,96	7,89
Chst8	6,37	4,16	4,87	6,44	4,36	6,3
Khdrbs3	4,05	2,01	1,69	4,07	2,49	4,02
Crybb1	7,94	6,12	5,67	8,11	5,96	7,96
Ccdc162	5,16	2,9	3,24	5,51	3,55	5,25
Pard3b	4,23	2,55	2,61	4,59	3,12	4,67
Slc43a1	3,21	0,88	1,11	3,28	1,51	2,93
Rgs7bp	4,81	2,42	2,67	4,87	2,7	4,62
Igf2bp2	4,38	1,82	2,11	4,27	2,41	4,16
Dusp27	4,86	2,73	2,69	4,93	2,9	4,57
Ptger3	2,62	0,44	0,12	2,46	0,46	2,64
Csmd3	6,25	3,37	4,25	6,17	4,01	6,13
Cd79b	5,52	3,51	3,45	5,82	3,53	5,74
LOC108168886	5,7	3,62	3,58	5,84	3,82	5,89
Eva1a	4,6	2,2	2,73	4,61	2,35	4,31
[truncated: 21 more rows]
