# Supplementary material for: Profilin 1 Controls a Microglial Cytoskeleton Checkpoint to Prevent Senescence and Premature Synaptic Decline
Source: Research Square preprint supplement (doi:10.21203/rs.3.rs-6666431/v1), 2025-08-27
Supplement: Supplementary file 5 [file c59e17d4886a37b628046786.xlsx]

## Sheet: Proteins
Protein FDR Confidence: Combined	Master	Accession	Description	# PSMs	# Unique Peptides	Gene Symbol	Abundance Ratio: (cKO) / (CT)	Abundance Ratio Adj. P-Value: (cKO) / (CT)	Found in Sample: [S1] F1: Sample, cKO	Found in Sample: [S4] F4: Sample, cKO	Found in Sample: [S5] F5: Sample, cKO	Found in Sample: [S7] F7: Sample, cKO	Found in Sample: [S8] F8: Sample, cKO	Found in Sample: [S2] F2: Sample, CT	Found in Sample: [S3] F3: Sample, CT	Found in Sample: [S6] F6: Sample, CT	Found in Sample: [S9] F9: Sample, CT	Found in Sample: [S10] F10: Sample, CT
High	Master Protein	O88343	Electrogenic sodium bicarbonate cotransporter 1 OS=Mus musculus OX=10090 GN=Slc4a4 PE=1 SV=2	292	2	Slc4a4	0.01	5.95594e-16	Not Found	Not Found	Not Found	Not Found	Not Found	High	Not Found	Not Found	High	Not Found
High	Master Protein	Q8BRU6	Synaptic vesicular amine transporter OS=Mus musculus OX=10090 GN=Slc18a2 PE=1 SV=1	6	2	Slc18a2	0.172	5.95594e-16	High	High	Peak Found	High	High	High	Peak Found	Peak Found	Peak Found	High
High	Master Protein	Q9QX60	Deoxyguanosine kinase, mitochondrial OS=Mus musculus OX=10090 GN=Dguok PE=1 SV=3	2	2	Dguok	0.01	5.95594e-16	Not Found	High	Not Found	Not Found	Not Found	High	Peak Found	Peak Found	Peak Found	Not Found
High	Master Protein	G3UYP4	Potassium voltage-gated channel subfamily KQT member 5 OS=Mus musculus OX=10090 GN=Kcnq5 PE=1 SV=1	2	2	Kcnq5	0.01	5.95594e-16	Not Found	Not Found	High	Not Found	Not Found	Not Found	Not Found	High	Peak Found	Peak Found
High	Master Protein	Q6PFX7	Neuronal tyrosine-phosphorylated phosphoinositide-3-kinase adapter 1 OS=Mus musculus OX=10090 GN=Nyap1 PE=1 SV=1	2	2	Nyap1	100	5.95594e-16	Not Found	High	Not Found	Peak Found	Peak Found	Not Found	High	Not Found	Not Found	Not Found
High	Master Protein	P97449	Aminopeptidase N OS=Mus musculus OX=10090 GN=Anpep PE=1 SV=4	2	2	Anpep	0.01	5.95594e-16	Not Found	Not Found	Not Found	Not Found	Not Found	Peak Found	Not Found	Not Found	High	High
High	Master Protein	Q80X90	Filamin-B OS=Mus musculus OX=10090 GN=Flnb PE=1 SV=3	4	2	Flnb	2.244	5.95594e-16	Peak Found	Peak Found	Peak Found	High	Peak Found	High	High	Peak Found	Peak Found	Peak Found
High	Master Protein	P56528	ADP-ribosyl cyclase/cyclic ADP-ribose hydrolase 1 OS=Mus musculus OX=10090 GN=Cd38 PE=1 SV=2	4	2	Cd38	100	5.95594e-16	Peak Found	High	Peak Found	High	Peak Found	Not Found	Not Found	Not Found	Not Found	Not Found
High	Master Protein	P97813	Phospholipase D2 OS=Mus musculus OX=10090 GN=Pld2 PE=1 SV=2	3	2	Pld2	100	5.95594e-16	Peak Found	Peak Found	Not Found	High	Peak Found	Not Found	Not Found	Not Found	Not Found	Not Found
High	Master Protein	Q80TT8	Cullin-9 OS=Mus musculus OX=10090 GN=Cul9 PE=1 SV=2	2	2	Cul9	0.152	5.95594e-16	Not Found	Not Found	Peak Found	High	Not Found	Peak Found	High	Peak Found	Peak Found	Peak Found
High	Master Protein	F8VQ70	S phase cyclin A-associated protein in the ER OS=Mus musculus OX=10090 GN=Scaper PE=1 SV=1	3	2	Scaper	100	5.95594e-16	High	Peak Found	Peak Found	Peak Found	Peak Found	Not Found	Not Found	Not Found	Not Found	Not Found
High	Master Protein	P21981	Protein-glutamine gamma-glutamyltransferase 2 OS=Mus musculus OX=10090 GN=Tgm2 PE=1 SV=4	3	2	Tgm2	12.193	5.95594e-16	Peak Found	Peak Found	High	Peak Found	High	Peak Found	Peak Found	Not Found	High	Not Found
High	Master Protein	S4R1B8	Bridging integrator 2 OS=Mus musculus OX=10090 GN=Bin2 PE=1 SV=1	43	3	Bin2	0.01	5.95594e-16	High	Not Found	Not Found	High	Not Found	High	Peak Found	High	High	High
High	Master Protein	Q5F2E7	Nuclear fragile X mental retardation-interacting protein 2 OS=Mus musculus OX=10090 GN=Nufip2 PE=1 SV=1	5	3	Nufip2	0.01	5.95594e-16	Not Found	Not Found	Not Found	Not Found	High	High	High	High	Not Found	Not Found
High	Master Protein	G3UY13	Interleukin-1 receptor accessory protein OS=Mus musculus OX=10090 GN=Il1rap PE=1 SV=1	3	3	Il1rap	0.243	5.95594e-16	Not Found	Peak Found	Peak Found	Peak Found	High	High	Peak Found	Not Found	Not Found	Not Found
High	Master Protein	Q3TRM4	Patatin-like phospholipase domain-containing protein 6 OS=Mus musculus OX=10090 GN=Pnpla6 PE=1 SV=2	3	3	Pnpla6	0.01	5.95594e-16	Not Found	Not Found	Not Found	Not Found	Not Found	High	Not Found	Not Found	High	High
High	Master Protein	F6VQZ6	Protein shisa-6 (Fragment) OS=Mus musculus OX=10090 GN=Shisa6 PE=1 SV=1	4	4	Shisa6	0.143	5.95594e-16	Not Found	Not Found	Peak Found	Not Found	Not Found	High	Not Found	Not Found	High	Not Found
High	Master Protein	O35639	Annexin A3 OS=Mus musculus OX=10090 GN=Anxa3 PE=1 SV=4	52	12	Anxa3	0.522	5.95594e-16	High	High	High	High	High	High	High	High	High	High
High	Master Protein	P03995	Glial fibrillary acidic protein OS=Mus musculus OX=10090 GN=Gfap PE=1 SV=4	133	22	Gfap	1.632	5.95594e-16	High	High	High	High	High	High	High	High	High	High
High	Master Protein	Q9D2P8	Myelin-associated oligodendrocyte basic protein OS=Mus musculus OX=10090 GN=Mobp PE=1 SV=1	21	2	Mobp	1.799	1.54581e-11	High	High	High	High	High	High	High	High	High	High
High	Master Protein	Q9CQE5	Regulator of G-protein signaling 10 OS=Mus musculus OX=10090 GN=Rgs10 PE=1 SV=1	19	4	Rgs10	0.46	9.38809e-11	High	High	High	Peak Found	Peak Found	High	High	High	High	High
High	Master Protein	Q9EPB4	Apoptosis-associated speck-like protein containing a CARD OS=Mus musculus OX=10090 GN=Pycard PE=1 SV=1	4	3	Pycard	0.378	2.81678e-08	Peak Found	Not Found	Peak Found	Peak Found	Peak Found	Peak Found	High	Peak Found	High	High
High	Master Protein	P20060	Beta-hexosaminidase subunit beta OS=Mus musculus OX=10090 GN=Hexb PE=1 SV=2	123	17	Hexb	0.694	1.23676e-07	High	High	High	High	High	High	High	High	High	High
High	Master Protein	F6XC25	Coiled-coil and C2 domain-containing protein 1B (Fragment) OS=Mus musculus OX=10090 GN=Cc2d1b PE=1 SV=1	3	2	Cc2d1b	2.717	1.7619e-07	High	Peak Found	Peak Found	Peak Found	High	High	Peak Found	Peak Found	Not Found	Not Found
High	Master Protein	P08226	Apolipoprotein E OS=Mus musculus OX=10090 GN=Apoe PE=1 SV=2	138	18	Apoe	1.35	1.34435e-06	High	High	High	High	High	High	High	High	High	High
High	Master Protein	A0A1L1SS47	CCR4-NOT transcription complex subunit 10 OS=Mus musculus OX=10090 GN=Cnot10 PE=1 SV=1	2	2	Cnot10	0.302	2.24435e-06	High	Peak Found	Peak Found	Peak Found	Peak Found	Not Found	Peak Found	High	Peak Found	Not Found
High	Master Protein	G5E8B6	Kin of IRRE-like protein 3 OS=Mus musculus OX=10090 GN=Kirrel3 PE=1 SV=1	5	4	Kirrel3	1.909	2.10058e-05	Peak Found	High	Peak Found	High	Peak Found	Peak Found	Peak Found	High	High	Peak Found
High	Master Protein	O89079	Coatomer subunit epsilon OS=Mus musculus OX=10090 GN=Cope PE=1 SV=3	14	4	Cope	0.487	2.58028e-05	High	High	High	High	High	High	High	High	Peak Found	Peak Found
High	Master Protein	Q542I8	Integrin beta OS=Mus musculus OX=10090 GN=Itgb2 PE=1 SV=1	43	13	Itgb2	0.665	3.13665e-05	High	High	High	High	High	High	High	High	High	High
High	Master Protein	Q9CPU4	Microsomal glutathione S-transferase 3 OS=Mus musculus OX=10090 GN=Mgst3 PE=1 SV=1	171	5	Mgst3	0.751	3.87108e-05	High	High	High	High	High	High	High	High	High	High
High	Master Protein	P04247	Myoglobin OS=Mus musculus OX=10090 GN=Mb PE=1 SV=3	9	4	Mb	1.847	0.000171214	Not Found	Not Found	High	High	High	Peak Found	Peak Found	Not Found	High	Peak Found
High	Master Protein	Q8BNA6	Protocadherin Fat 3 OS=Mus musculus OX=10090 GN=Fat3 PE=1 SV=2	4	3	Fat3	1.982	0.000213471	Peak Found	Peak Found	Peak Found	Peak Found	Peak Found	Not Found	Peak Found	High	High	High
High	Master Protein	Q61423	Potassium voltage-gated channel subfamily A member 4 OS=Mus musculus OX=10090 GN=Kcna4 PE=1 SV=2	24	3	Kcna4	1.658	0.000449723	High	Peak Found	High	High	High	High	High	Peak Found	High	Peak Found
High	Master Protein	Q6DFZ1	Golgi-specific brefeldin A-resistance factor 1 OS=Mus musculus OX=10090 GN=Gbf1 PE=1 SV=1	3	3	Gbf1	0.621	0.000584449	Peak Found	High	Peak Found	Peak Found	Peak Found	High	Peak Found	High	Peak Found	Peak Found
High	Master Protein	A0A1L1SUN1	60S ribosomal protein L29 (Fragment) OS=Mus musculus OX=10090 GN=Rpl29 PE=1 SV=1	10	2	Rpl29	1.41	0.000600166	High	High	High	High	High	High	High	Peak Found	Peak Found	High
High	Master Protein	Q8BYZ1	ABI gene family member 3 OS=Mus musculus OX=10090 GN=Abi3 PE=1 SV=3	8	3	Abi3	0.627	0.000654866	Peak Found	Peak Found	Peak Found	Peak Found	Peak Found	High	High	High	High	High
High	Master Protein	Q9D0J4	ADP-ribosylation factor-like protein 2 OS=Mus musculus OX=10090 GN=Arl2 PE=1 SV=1	3	2	Arl2	1.999	0.000745472	Peak Found	Peak Found	Peak Found	Peak Found	Peak Found	High	Peak Found	Peak Found	High	Peak Found
High	Master Protein	P48774	Glutathione S-transferase Mu 5 OS=Mus musculus OX=10090 GN=Gstm5 PE=1 SV=1	175	15	Gstm5	0.785	0.000816193	High	High	High	High	High	High	High	High	High	High
High	Master Protein	Q8K0D0	Cyclin-dependent kinase 17 OS=Mus musculus OX=10090 GN=Cdk17 PE=1 SV=2	27	4	Cdk17	2.594	0.000873628	High	Not Found	Peak Found	High	High	High	Not Found	High	High	Not Found
High	Master Protein	Q8R5A6	TBC1 domain family member 22A OS=Mus musculus OX=10090 GN=Tbc1d22a PE=1 SV=3	2	2	Tbc1d22a	1.762	0.00160984	Peak Found	High	Peak Found	Peak Found	Peak Found	Peak Found	Peak Found	High	Peak Found	Not Found
High	Master Protein	Q3U0D9	E3 ubiquitin-protein ligase HACE1 OS=Mus musculus OX=10090 GN=Hace1 PE=1 SV=1	4	3	Hace1	0.517	0.00160984	Peak Found	Peak Found	Peak Found	Peak Found	High	Not Found	High	Peak Found	High	High
High	Master Protein	Q80TN5	Palmitoyltransferase ZDHHC17 OS=Mus musculus OX=10090 GN=Zdhhc17 PE=1 SV=2	2	2	Zdhhc17	0.569	0.00167904	Peak Found	Peak Found	Peak Found	Peak Found	Peak Found	High	Peak Found	Peak Found	Peak Found	Peak Found
High	Master Protein	Q99KL7	Ras-related protein Rab-28 OS=Mus musculus OX=10090 GN=Rab28 PE=1 SV=1	3	2	Rab28	0.516	0.00173609	Peak Found	Peak Found	Peak Found	Peak Found	Peak Found	Not Found	Peak Found	High	Not Found	High
High	Master Protein	Q9CQZ5	NADH dehydrogenase [ubiquinone] 1 alpha subcomplex subunit 6 OS=Mus musculus OX=10090 GN=Ndufa6 PE=1 SV=1	93	8	Ndufa6	1.223	0.00190247	High	High	High	High	High	High	High	High	High	High
High	Master Protein	Q8K199	COX assembly mitochondrial protein 2 homolog OS=Mus musculus OX=10090 GN=Cmc2 PE=3 SV=1	11	2	Cmc2	1.713	0.00277319	Peak Found	High	High	High	High	High	High	High	High	High
High	Master Protein	Q91YQ3	Cold shock domain-containing protein C2 OS=Mus musculus OX=10090 GN=Csdc2 PE=1 SV=2	16	3	Csdc2	0.624	0.00277319	High	High	High	Peak Found	High	High	High	High	High	High
High	Master Protein	Q9JKL5	Calcineurin B homologous protein 3 OS=Mus musculus OX=10090 GN=Tesc PE=1 SV=2	13	3	Tesc	0.618	0.00293816	High	High	Peak Found	High	High	High	Peak Found	High	High	High
High	Master Protein	Q8K449	ATP-binding cassette sub-family A member 9 OS=Mus musculus OX=10090 GN=Abca9 PE=1 SV=2	6	2	Abca9	0.422	0.00330114	Peak Found	Peak Found	High	Peak Found	High	High	Peak Found	Peak Found	High	High
High	Master Protein	Q99LB7	Sarcosine dehydrogenase, mitochondrial OS=Mus musculus OX=10090 GN=Sardh PE=1 SV=1	16	6	Sardh	1.3	0.00353413	High	High	High	High	High	High	High	High	High	High
High	Master Protein	P04370	Myelin basic protein OS=Mus musculus OX=10090 GN=Mbp PE=1 SV=2	658	10	Mbp	1.23	0.00360441	High	High	High	High	High	High	High	High	High	High
High	Master Protein	Q8K1B8	Fermitin family homolog 3 OS=Mus musculus OX=10090 GN=Fermt3 PE=1 SV=1	3	2	Fermt3	0.595	0.0040977	Peak Found	Peak Found	Peak Found	Peak Found	Not Found	Peak Found	High	High	Peak Found	High
High	Master Protein	P26041	Moesin OS=Mus musculus OX=10090 GN=Msn PE=1 SV=3	163	11	Msn	0.754	0.00512747	High	High	High	High	High	High	High	High	High	High
High	Master Protein	Q9JKC6	Cell cycle exit and neuronal differentiation protein 1 OS=Mus musculus OX=10090 GN=Cend1 PE=1 SV=1	93	4	Cend1	1.234	0.00514196	High	High	High	High	High	High	High	High	High	High
High	Master Protein	O08908	Phosphatidylinositol 3-kinase regulatory subunit beta OS=Mus musculus OX=10090 GN=Pik3r2 PE=1 SV=2	9	2	Pik3r2	1.647	0.00606643	High	Peak Found	Peak Found	High	High	Peak Found	High	High	Peak Found	High
High	Master Protein	Q91WA3	Histone deacetylase 11 OS=Mus musculus OX=10090 GN=Hdac11 PE=1 SV=1	4	4	Hdac11	0.593	0.00609016	Peak Found	Peak Found	Peak Found	Peak Found	Peak Found	High	High	High	Peak Found	Peak Found
High	Master Protein	Q505D7	Optic atrophy 3 protein homolog OS=Mus musculus OX=10090 GN=Opa3 PE=1 SV=1	14	2	Opa3	0.684	0.00634775	High	High	High	High	High	High	High	High	High	High
High	Master Protein	A2AP74	CD99 antigen-like protein 2 OS=Mus musculus OX=10090 GN=Cd99l2 PE=1 SV=1	50	4	Cd99l2	0.735	0.00780993	High	High	High	High	High	High	High	High	High	High
High	Master Protein	Q9JI46	Diphosphoinositol polyphosphate phosphohydrolase 1 OS=Mus musculus OX=10090 GN=Nudt3 PE=1 SV=1	32	5	Nudt3	0.74	0.00908543	High	High	High	High	High	High	High	High	High	High
High	Master Protein	Q8BYH8	Chromodomain-helicase-DNA-binding protein 9 OS=Mus musculus OX=10090 GN=Chd9 PE=1 SV=2	6	2	Chd9	1.406	0.00997342	High	Peak Found	High	Peak Found	Peak Found	High	High	Peak Found	High	Peak Found
High	Master Protein	E9PV44	ATP synthase F1 subunit epsilon OS=Mus musculus OX=10090 GN=Atpif1 PE=1 SV=1	68	6	Atpif1	1.2	0.0118735	High	High	High	High	High	High	High	High	High	High
High	Master Protein	Q8VCW8	Medium-chain acyl-CoA ligase ACSF2, mitochondrial OS=Mus musculus OX=10090 GN=Acsf2 PE=1 SV=1	159	23	Acsf2	1.212	0.0138288	High	High	High	High	High	High	High	High	High	High
High	Master Protein	P48320	Glutamate decarboxylase 2 OS=Mus musculus OX=10090 GN=Gad2 PE=1 SV=1	170	14	Gad2	0.822	0.0144398	High	High	High	High	High	High	High	High	High	High
High	Master Protein	D6RI20	Immediate early response 3-interacting protein 1 OS=Mus musculus OX=10090 GN=Gm50364 PE=4 SV=1	4	2	Gm50364	0.683	0.0161741	High	Peak Found	Peak Found	High	High	High	Peak Found	Peak Found	Peak Found	Peak Found
High	Master Protein	Q8BH43	Wiskott-Aldrich syndrome protein family member 2 OS=Mus musculus OX=10090 GN=Wasf2 PE=1 SV=1	33	3	Wasf2	0.686	0.016919	High	High	High	High	High	Peak Found	High	High	High	High
High	Master Protein	Q9DBL9	1-acylglycerol-3-phosphate O-acyltransferase ABHD5 OS=Mus musculus OX=10090 GN=Abhd5 PE=1 SV=1	3	2	Abhd5	0.486	0.017077	Not Found	High	Not Found	Peak Found	High	Peak Found	High	Not Found	Not Found	Not Found
High	Master Protein	Q922J6	Tetraspanin-2 OS=Mus musculus OX=10090 GN=Tspan2 PE=1 SV=1	25	2	Tspan2	1.205	0.0190981	High	High	High	High	High	High	High	Peak Found	High	High
High	Master Protein	Q9QXE0	2-hydroxyacyl-CoA lyase 1 OS=Mus musculus OX=10090 GN=Hacl1 PE=1 SV=2	2	2	Hacl1	2.04	0.0203846	Peak Found	Peak Found	Peak Found	High	Peak Found	Peak Found	Not Found	High	Peak Found	Not Found
High	Master Protein	Q80TB8	Synaptic vesicle membrane protein VAT-1 homolog-like OS=Mus musculus OX=10090 GN=Vat1l PE=1 SV=2	179	21	Vat1l	0.822	0.021221	High	High	High	High	High	High	High	High	High	High
High	Master Protein	Q9DBX2	Phosducin-like protein OS=Mus musculus OX=10090 GN=Pdcl PE=1 SV=1	12	3	Pdcl	1.508	0.021407	High	Peak Found	High	High	Peak Found	High	High	High	High	High
High	Master Protein	Q543K9	Purine nucleoside phosphorylase OS=Mus musculus OX=10090 GN=Pnp PE=1 SV=1	17	4	Pnp	0.696	0.0219249	High	High	High	High	High	High	High	High	High	High
High	Master Protein	Q9CR29	Coiled-coil domain-containing protein 43 OS=Mus musculus OX=10090 GN=Ccdc43 PE=1 SV=1	16	2	Ccdc43	1.373	0.0257895	High	High	High	High	Peak Found	High	High	High	High	High
High	Master Protein	Q8CHT0	Delta-1-pyrroline-5-carboxylate dehydrogenase, mitochondrial OS=Mus musculus OX=10090 GN=Aldh4a1 PE=1 SV=3	90	14	Aldh4a1	1.222	0.0265776	High	High	High	High	High	High	High	High	High	High
High	Master Protein	Q99JX4	Eukaryotic translation initiation factor 3 subunit M OS=Mus musculus OX=10090 GN=Eif3m PE=1 SV=1	17	4	Eif3m	0.69	0.0269757	High	High	High	High	High	High	High	High	High	High
High	Master Protein	D3Z7G4	cDNA sequence BC024978 OS=Mus musculus OX=10090 GN=BC024978 PE=1 SV=1	2	2	BC024978	0.635	0.0269957	Peak Found	Peak Found	Peak Found	High	Peak Found	Peak Found	Peak Found	Peak Found	High	Peak Found
High	Master Protein	Q9WUB0	RanBP-type and C3HC4-type zinc finger-containing protein 1 OS=Mus musculus OX=10090 GN=Rbck1 PE=1 SV=2	2	2	Rbck1	0.759	0.0269957	Peak Found	Peak Found	Peak Found	Peak Found	High	High	Peak Found	Peak Found	Peak Found	Peak Found
High	Master Protein	Q8BFS6	Serine/threonine-protein phosphatase CPPED1 OS=Mus musculus OX=10090 GN=Cpped1 PE=1 SV=1	9	5	Cpped1	0.683	0.0292706	High	Peak Found	Peak Found	High	Peak Found	High	High	High	High	Peak Found
High	Master Protein	Q61327	Sodium-dependent dopamine transporter OS=Mus musculus OX=10090 GN=Slc6a3 PE=1 SV=2	20	2	Slc6a3	0.641	0.0300676	High	Peak Found	High	High	Peak Found	High	Peak Found	High	Peak Found	Peak Found
High	Master Protein	Q8JZL3	Thiamine-triphosphatase OS=Mus musculus OX=10090 GN=Thtpa PE=1 SV=3	4	3	Thtpa	0.624	0.0326866	Peak Found	Peak Found	Peak Found	Peak Found	Peak Found	Peak Found	High	High	Peak Found	High
High	Master Protein	P62983	Ubiquitin-40S ribosomal protein S27a OS=Mus musculus OX=10090 GN=Rps27a PE=1 SV=2	266	2	Rps27a	0.768	0.0329108	High	High	High	High	High	High	High	High	High	High
High	Master Protein	Q8CHK3	Lysophospholipid acyltransferase 7 OS=Mus musculus OX=10090 GN=Mboat7 PE=1 SV=1	32	5	Mboat7	0.708	0.0333834	High	High	High	High	High	High	High	High	High	High
High	Master Protein	Q9R0D8	WD repeat-containing protein 54 OS=Mus musculus OX=10090 GN=Wdr54 PE=1 SV=1	26	6	Wdr54	0.736	0.0349125	High	High	High	High	High	High	High	High	High	High
High	Master Protein	P61971	Nuclear transport factor 2 OS=Mus musculus OX=10090 GN=Nutf2 PE=1 SV=1	41	4	Nutf2	0.773	0.0350601	High	High	High	High	High	High	High	High	High	High
High	Master Protein	P31648	Sodium- and chloride-dependent GABA transporter 1 OS=Mus musculus OX=10090 GN=Slc6a1 PE=1 SV=2	171	10	Slc6a1	0.843	0.0356828	High	High	High	High	High	High	High	High	High	High
High	Master Protein	G3X9A7	PI-PLC X domain-containing protein 3 OS=Mus musculus OX=10090 GN=Plcxd3 PE=1 SV=1	62	9	Plcxd3	0.779	0.0357446	High	High	High	High	High	High	High	High	High	High
High	Master Protein	Q9CPQ1	Cytochrome c oxidase subunit 6C OS=Mus musculus OX=10090 GN=Cox6c PE=1 SV=3	125	5	Cox6c	1.184	0.0372584	High	High	High	High	High	High	High	High	High	High
High	Master Protein	A0A1W2P7Q6	Exportin-T OS=Mus musculus OX=10090 GN=Xpot PE=1 SV=1	6	4	Xpot	0.593	0.0382147	Peak Found	Not Found	Not Found	Peak Found	High	Peak Found	Peak Found	High	High	High
High	Master Protein	Q9JKD3	Secretory carrier-associated membrane protein 5 OS=Mus musculus OX=10090 GN=Scamp5 PE=1 SV=1	208	4	Scamp5	0.845	0.0395078	High	High	High	High	High	High	High	High	High	High
High	Master Protein	D3Z5N2	Stathmin OS=Mus musculus OX=10090 GN=Stmn1 PE=1 SV=1	154	5	Stmn1	1.182	0.0395078	High	High	High	High	High	High	High	High	High	High
High	Master Protein	Q8K004	Spermatogenesis-associated protein 2 OS=Mus musculus OX=10090 GN=Spata2 PE=1 SV=1	7	3	Spata2	1.176	0.0438629	Peak Found	Peak Found	Peak Found	Peak Found	Peak Found	High	High	High	High	High
High	Master Protein	P08752	Guanine nucleotide-binding protein G(i) subunit alpha-2 OS=Mus musculus OX=10090 GN=Gnai2 PE=1 SV=5	330	13	Gnai2	0.847	0.0473836	High	High	High	High	High	High	High	High	High	High
High	Master Protein	P29595	NEDD8 OS=Mus musculus OX=10090 GN=Nedd8 PE=1 SV=2	32	4	Nedd8	0.803	0.0483127	High	High	High	High	High	High	High	High	High	High
High	Master Protein	Q99J99	3-mercaptopyruvate sulfurtransferase OS=Mus musculus OX=10090 GN=Mpst PE=1 SV=4	87	9	Mpst	1.179	0.0500651	High	High	High	High	High	High	High	High	High	High
High	Master Protein	P52196	Thiosulfate sulfurtransferase OS=Mus musculus OX=10090 GN=Tst PE=1 SV=3	65	10	Tst	1.177	0.0500651	High	High	High	High	High	High	High	High	High	High
High	Master Protein	Q922F4	Tubulin beta-6 chain OS=Mus musculus OX=10090 GN=Tubb6 PE=1 SV=1	3052	7	Tubb6	0.849	0.0508379	High	High	High	High	High	High	High	High	High	High
High	Master Protein	Q3U5Q7	UMP-CMP kinase 2, mitochondrial OS=Mus musculus OX=10090 GN=Cmpk2 PE=1 SV=2	92	15	Cmpk2	1.192	0.0515991	High	High	High	High	High	High	High	High	High	High
High	Master Protein	Q8BFZ2	Phospholipid phosphatase-related protein type 1 OS=Mus musculus OX=10090 GN=Plppr1 PE=1 SV=1	11	2	Plppr1	0.687	0.0519814	High	High	High	High	High	Peak Found	Peak Found	High	High	High
High	Master Protein	Q6PGE7	Sodium-dependent proline transporter OS=Mus musculus OX=10090 GN=Slc6a7 PE=1 SV=1	22	4	Slc6a7	0.721	0.0541908	High	High	High	High	High	High	High	High	High	High
High	Master Protein	Q9Z2I8	Succinate--CoA ligase [GDP-forming] subunit beta, mitochondrial OS=Mus musculus OX=10090 GN=Suclg2 PE=1 SV=3	67	13	Suclg2	1.21	0.0554804	High	High	High	High	High	High	High	High	High	High
High	Master Protein	Q91W43	Glycine dehydrogenase (decarboxylating), mitochondrial OS=Mus musculus OX=10090 GN=Gldc PE=1 SV=1	73	14	Gldc	1.253	0.0555481	High	High	High	High	High	High	High	High	High	High
High	Master Protein	Q9CQL5	39S ribosomal protein L18, mitochondrial OS=Mus musculus OX=10090 GN=Mrpl18 PE=1 SV=1	5	3	Mrpl18	1.389	0.0573158	Peak Found	High	Peak Found	Peak Found	High	Peak Found	High	High	High	Peak Found
High	Master Protein	P12658	Calbindin OS=Mus musculus OX=10090 GN=Calb1 PE=1 SV=2	173	17	Calb1	0.841	0.0578084	High	High	High	High	High	High	High	High	High	High
High	Master Protein	Q9ES52	Phosphatidylinositol 3,4,5-trisphosphate 5-phosphatase 1 OS=Mus musculus OX=10090 GN=Inpp5d PE=1 SV=2	2	2	Inpp5d	0.527	0.0591022	Peak Found	High	High	Peak Found	Peak Found	Peak Found	Peak Found	Peak Found	Peak Found	Peak Found
High	Master Protein	Q9CQ75	NADH dehydrogenase [ubiquinone] 1 alpha subcomplex subunit 2 OS=Mus musculus OX=10090 GN=Ndufa2 PE=1 SV=3	103	6	Ndufa2	1.176	0.0593869	High	High	High	High	High	High	High	High	High	High
High	Master Protein	Q3UHT7	ERC protein 2 OS=Mus musculus OX=10090 GN=Erc2 PE=1 SV=1	350	2	Erc2	0.646	0.0594476	High	Peak Found	Peak Found	High	Peak Found	High	High	High	High	High
High	Master Protein	A0A0R4J083	Long-chain specific acyl-CoA dehydrogenase, mitochondrial OS=Mus musculus OX=10090 GN=Acadl PE=1 SV=1	142	12	Acadl	1.159	0.0627298	High	High	High	High	High	High	High	High	High	High
High	Master Protein	P51906	Excitatory amino acid transporter 3 OS=Mus musculus OX=10090 GN=Slc1a1 PE=1 SV=2	5	2	Slc1a1	0.647	0.0643225	High	High	Peak Found	Peak Found	Peak Found	Peak Found	High	High	High	Peak Found
High	Master Protein	Q9DB41	Mitochondrial glutamate carrier 2 OS=Mus musculus OX=10090 GN=Slc25a18 PE=1 SV=4	146	11	Slc25a18	1.172	0.0643225	High	High	High	High	High	High	High	High	High	High
High	Master Protein	A2A5R8	Double-stranded RNA-binding protein Staufen homolog 1 OS=Mus musculus OX=10090 GN=Stau1 PE=1 SV=1	7	3	Stau1	1.449	0.0657374	High	High	Peak Found	Peak Found	Peak Found	High	High	High	Peak Found	High
High	Master Protein	Q9CQ26	STAM-binding protein OS=Mus musculus OX=10090 GN=Stambp PE=1 SV=1	12	3	Stambp	1.458	0.0680579	High	High	High	Peak Found	High	High	Peak Found	Peak Found	High	High
High	Master Protein	P84309	Adenylate cyclase type 5 OS=Mus musculus OX=10090 GN=Adcy5 PE=1 SV=2	77	11	Adcy5	0.797	0.0767078	High	High	High	High	High	High	High	High	High	High
High	Master Protein	P49312	Heterogeneous nuclear ribonucleoprotein A1 OS=Mus musculus OX=10090 GN=Hnrnpa1 PE=1 SV=2	15	6	Hnrnpa1	0.688	0.0802682	High	High	Peak Found	High	High	High	High	High	High	High
High	Master Protein	Q7M6W1	Reticulon OS=Mus musculus OX=10090 GN=Rtn1 PE=1 SV=1	130	4	Rtn1	0.847	0.0805343	High	High	High	High	High	High	High	High	High	High
High	Master Protein	Q7TSK2	Seizure protein 6 OS=Mus musculus OX=10090 GN=Sez6 PE=1 SV=1	8	2	Sez6	0.773	0.0831048	High	High	High	High	Peak Found	High	Peak Found	High	Peak Found	High
High	Master Protein	D3YXA6	Tripartite motif-containing protein 46 OS=Mus musculus OX=10090 GN=Trim46 PE=1 SV=1	23	5	Trim46	0.8	0.0831399	High	High	High	High	High	High	High	High	High	High
High	Master Protein	Q9DCC8	Mitochondrial import receptor subunit TOM20 homolog OS=Mus musculus OX=10090 GN=Tomm20 PE=1 SV=1	39	3	Tomm20	1.173	0.0837272	High	High	High	High	High	High	High	High	High	High
High	Master Protein	P53395	Lipoamide acyltransferase component of branched-chain alpha-keto acid dehydrogenase complex, mitochondrial OS=Mus musculus OX=10090 GN=Dbt PE=1 SV=2	95	14	Dbt	1.17	0.0859228	High	High	High	High	High	High	High	High	High	High
High	Master Protein	Q3UE92	Xaa-Pro aminopeptidase 1 OS=Mus musculus OX=10090 GN=Xpnpep1 PE=1 SV=1	153	20	Xpnpep1	0.835	0.0935011	High	High	High	High	High	High	High	High	High	High
High	Master Protein	Q9CQ91	NADH dehydrogenase [ubiquinone] 1 alpha subcomplex subunit 3 OS=Mus musculus OX=10090 GN=Ndufa3 PE=1 SV=1	65	2	Ndufa3	1.16	0.0969442	High	High	High	High	High	High	High	High	High	High
High	Master Protein	A0A0H2UKB8	Ubiquitin carboxyl-terminal hydrolase OS=Mus musculus OX=10090 GN=Usp33 PE=1 SV=1	5	3	Usp33	0.63	0.0989592	High	Peak Found	Peak Found	Peak Found	Peak Found	High	High	Peak Found	High	Peak Found
High	Master Protein	E9Q4P1	WD repeat and FYVE domain-containing protein 1 OS=Mus musculus OX=10090 GN=Wdfy1 PE=1 SV=1	52	10	Wdfy1	0.801	0.0989592	High	High	High	High	High	High	High	High	High	High
High	Master Protein	P62774	Myotrophin OS=Mus musculus OX=10090 GN=Mtpn PE=1 SV=2	28	3	Mtpn	0.807	0.100513	High	High	High	High	High	High	High	High	High	High
High	Master Protein	A0A2I3BRW0	Microsomal signal peptidase 12 kDa subunit OS=Mus musculus OX=10090 GN=Spcs1 PE=1 SV=1	7	2	Spcs1	0.736	0.100924	High	High	High	High	High	Peak Found	Peak Found	Peak Found	High	Peak Found
High	Master Protein	Q9D3A9	Protein tweety homolog 1 OS=Mus musculus OX=10090 GN=Ttyh1 PE=1 SV=1	95	9	Ttyh1	0.849	0.100924	High	High	High	High	High	High	High	High	High	High
High	Master Protein	E9PYP8	Beta-B1 crystallin (Fragment) OS=Mus musculus OX=10090 GN=Crybb1 PE=1 SV=1	5	3	Crybb1	0.696	0.103716	Not Found	Peak Found	Peak Found	Peak Found	Not Found	Peak Found	High	High	High	Peak Found
High	Master Protein	A0A0R4J0B4	CMP-N-acetylneuraminic acid synthase OS=Mus musculus OX=10090 GN=Cmas PE=1 SV=1	7	4	Cmas	0.684	0.105116	Peak Found	High	High	Peak Found	High	High	Peak Found	High	High	High
High	Master Protein	Q8BGH7	CDC42 small effector protein 2 OS=Mus musculus OX=10090 GN=Cdc42se2 PE=1 SV=1	15	2	Cdc42se2	0.754	0.111516	High	High	High	Peak Found	High	High	High	High	High	High
High	Master Protein	A0A1L1SQE2	Jouberin OS=Mus musculus OX=10090 GN=Ahi1 PE=1 SV=1	10	5	Ahi1	0.718	0.113978	Peak Found	Peak Found	Peak Found	Peak Found	Peak Found	High	High	High	High	High
High	Master Protein	Q9Z1P6	NADH dehydrogenase [ubiquinone] 1 alpha subcomplex subunit 7 OS=Mus musculus OX=10090 GN=Ndufa7 PE=1 SV=3	149	6	Ndufa7	1.157	0.114278	High	High	High	High	High	High	High	High	High	High
High	Master Protein	P97822	Acidic leucine-rich nuclear phosphoprotein 32 family member E OS=Mus musculus OX=10090 GN=Anp32e PE=1 SV=2	14	4	Anp32e	0.758	0.116312	Peak Found	High	Peak Found	High	High	High	High	High	High	High
High	Master Protein	P54923	[Protein ADP-ribosylarginine] hydrolase OS=Mus musculus OX=10090 GN=Adprh PE=1 SV=1	64	10	Adprh	0.793	0.116319	High	High	High	High	High	High	High	High	High	High
High	Master Protein	Q61885	Myelin-oligodendrocyte glycoprotein OS=Mus musculus OX=10090 GN=Mog PE=1 SV=1	92	10	Mog	1.145	0.118246	High	High	High	High	High	High	High	High	High	High
High	Master Protein	Q8BTX9	Inactive hydroxysteroid dehydrogenase-like protein 1 OS=Mus musculus OX=10090 GN=Hsdl1 PE=1 SV=1	30	7	Hsdl1	1.232	0.120596	High	High	High	High	High	High	High	High	High	High
High	Master Protein	Q62093	Serine/arginine-rich splicing factor 2 OS=Mus musculus OX=10090 GN=Srsf2 PE=1 SV=4	29	4	Srsf2	0.735	0.122236	High	High	High	High	High	High	High	High	High	High
High	Master Protein	Q9QZH6	Evolutionarily conserved signaling intermediate in Toll pathway, mitochondrial OS=Mus musculus OX=10090 GN=Ecsit PE=1 SV=2	14	5	Ecsit	1.443	0.122236	High	High	High	High	Peak Found	High	High	High	Peak Found	High
High	Master Protein	P62908	40S ribosomal protein S3 OS=Mus musculus OX=10090 GN=Rps3 PE=1 SV=1	155	17	Rps3	0.855	0.127827	High	High	High	High	High	High	High	High	High	High
High	Master Protein	G5E8F8	Integrin beta OS=Mus musculus OX=10090 GN=Itgb5 PE=1 SV=1	3	2	Itgb5	1.652	0.128325	Peak Found	Peak Found	Peak Found	Peak Found	High	High	High	Peak Found	Peak Found	Peak Found
High	Master Protein	Q9CRC6	BLOC-1-related complex subunit 7 OS=Mus musculus OX=10090 GN=Borcs7 PE=1 SV=1	6	2	Borcs7	1.384	0.131595	High	High	High	High	Peak Found	Peak Found	Peak Found	High	Peak Found	High
High	Master Protein	Q60766	Immunity-related GTPase family M protein 1 OS=Mus musculus OX=10090 GN=Irgm1 PE=1 SV=1	11	4	Irgm1	1.507	0.132811	High	High	High	High	High	Peak Found	High	Peak Found	Peak Found	High
High	Master Protein	Q3UUJ4	STE20-related kinase adapter protein alpha OS=Mus musculus OX=10090 GN=Strada PE=1 SV=1	6	3	Strada	1.382	0.134741	Peak Found	High	High	Peak Found	High	Peak Found	High	Peak Found	Peak Found	Peak Found
High	Master Protein	Q91VK2	Eef1d protein OS=Mus musculus OX=10090 GN=Eef1d PE=1 SV=1	110	2	Eef1d	0.798	0.135441	High	High	High	Peak Found	High	High	High	High	High	High
High	Master Protein	Q9D8B7	Junctional adhesion molecule C OS=Mus musculus OX=10090 GN=Jam3 PE=1 SV=2	44	6	Jam3	1.221	0.136791	High	High	High	High	High	High	High	High	High	High
High	Master Protein	P62962	Profilin-1 OS=Mus musculus OX=10090 GN=Pfn1 PE=1 SV=2	292	12	Pfn1	0.867	0.136791	High	High	High	High	High	High	High	High	High	High
High	Master Protein	Q8K2Q9	Shootin-1 OS=Mus musculus OX=10090 GN=Shtn1 PE=1 SV=1	7	3	Shtn1	1.188	0.138511	Peak Found	High	High	Peak Found	High	High	High	High	Peak Found	Peak Found
High	Master Protein	Q8K4F5	Protein ABHD11 OS=Mus musculus OX=10090 GN=Abhd11 PE=1 SV=1	34	9	Abhd11	1.219	0.139527	High	High	High	High	High	High	High	High	High	Peak Found
High	Master Protein	Q9CQM8	60S ribosomal protein L21 OS=Mus musculus OX=10090 GN=Rpl21 PE=1 SV=1	50	5	Rpl21	0.813	0.141395	High	High	High	High	High	High	High	High	High	High
High	Master Protein	P26043	Radixin OS=Mus musculus OX=10090 GN=Rdx PE=1 SV=3	149	8	Rdx	0.811	0.142346	High	High	High	High	High	High	High	High	High	High
High	Master Protein	P20917	Myelin-associated glycoprotein OS=Mus musculus OX=10090 GN=Mag PE=1 SV=3	113	13	Mag	1.142	0.144494	High	High	High	High	High	High	High	High	High	High
High	Master Protein	Q8R4E6	Purine-rich element-binding protein gamma OS=Mus musculus OX=10090 GN=Purg PE=1 SV=1	27	3	Purg	0.702	0.145621	High	High	Peak Found	High	Peak Found	High	High	High	High	High
High	Master Protein	Q64433	10 kDa heat shock protein, mitochondrial OS=Mus musculus OX=10090 GN=Hspe1 PE=1 SV=2	179	9	Hspe1	1.15	0.145621	High	High	High	High	High	High	High	High	High	High
High	Master Protein	Q9DCT5	Stromal cell-derived factor 2 OS=Mus musculus OX=10090 GN=Sdf2 PE=1 SV=1	17	3	Sdf2	0.749	0.146003	High	High	High	High	High	High	High	High	High	High
High	Master Protein	F7AEH4	40S ribosomal protein S12 OS=Mus musculus OX=10090 GN=Rps12 PE=1 SV=1	101	9	Rps12	0.853	0.148983	High	High	High	High	High	High	High	High	High	High
High	Master Protein	P57722	Poly(rC)-binding protein 3 OS=Mus musculus OX=10090 GN=Pcbp3 PE=1 SV=3	80	4	Pcbp3	0.711	0.149135	Peak Found	High	High	Peak Found	Peak Found	Peak Found	High	Peak Found	High	High
High	Master Protein	P51655	Glypican-4 OS=Mus musculus OX=10090 GN=Gpc4 PE=1 SV=2	59	9	Gpc4	0.8	0.151024	High	High	High	High	High	High	High	High	High	High
High	Master Protein	A0A1L1STE6	Isocitrate dehydrogenase [NAD] subunit, mitochondrial OS=Mus musculus OX=10090 GN=Idh3a PE=1 SV=1	776	19	Idh3a	1.149	0.151024	High	High	High	High	High	High	High	High	High	High
High	Master Protein	P62754	40S ribosomal protein S6 OS=Mus musculus OX=10090 GN=Rps6 PE=1 SV=1	22	4	Rps6	0.815	0.152384	High	High	High	High	High	High	High	High	High	High
High	Master Protein	E0CXP0	Ly6/PLAUR domain-containing protein 1 OS=Mus musculus OX=10090 GN=Lypd1 PE=1 SV=1	30	3	Lypd1	0.754	0.153011	High	High	High	High	High	High	High	High	High	High
High	Master Protein	Q8BYI6	Lysophosphatidylcholine acyltransferase 2 OS=Mus musculus OX=10090 GN=Lpcat2 PE=1 SV=1	4	2	Lpcat2	0.565	0.15507	Peak Found	Peak Found	Peak Found	Peak Found	Peak Found	Peak Found	High	High	High	High
High	Master Protein	P31786	Acyl-CoA-binding protein OS=Mus musculus OX=10090 GN=Dbi PE=1 SV=2	100	4	Dbi	0.862	0.156198	High	High	High	High	High	High	High	High	High	High
High	Master Protein	Q9CXV1	Succinate dehydrogenase [ubiquinone] cytochrome b small subunit, mitochondrial OS=Mus musculus OX=10090 GN=Sdhd PE=1 SV=2	15	2	Sdhd	0.73	0.156664	High	High	High	High	High	High	High	High	High	High
High	Master Protein	Q9QYG0	Protein NDRG2 OS=Mus musculus OX=10090 GN=Ndrg2 PE=1 SV=1	381	16	Ndrg2	0.871	0.158271	High	High	High	High	High	High	High	High	High	High
High	Master Protein	Q62048	Astrocytic phosphoprotein PEA-15 OS=Mus musculus OX=10090 GN=Pea15 PE=1 SV=1	112	7	Pea15	0.86	0.158277	High	High	High	High	High	High	High	High	High	High
High	Master Protein	P34884	Macrophage migration inhibitory factor OS=Mus musculus OX=10090 GN=Mif PE=1 SV=2	75	3	Mif	0.863	0.159382	High	High	High	High	High	High	High	High	High	High
High	Master Protein	Q9DCS9	NADH dehydrogenase [ubiquinone] 1 beta subcomplex subunit 10 OS=Mus musculus OX=10090 GN=Ndufb10 PE=1 SV=3	219	14	Ndufb10	1.146	0.162519	High	High	High	High	High	High	High	High	High	High
High	Master Protein	Q5XJY5	Coatomer subunit delta OS=Mus musculus OX=10090 GN=Arcn1 PE=1 SV=2	39	11	Arcn1	0.806	0.165061	High	High	High	High	High	High	High	High	High	High
High	Master Protein	P19246	Neurofilament heavy polypeptide OS=Mus musculus OX=10090 GN=Nefh PE=1 SV=3	126	16	Nefh	1.142	0.166125	High	High	High	High	High	High	High	High	High	High
High	Master Protein	Q91VR8	Protein BRICK1 OS=Mus musculus OX=10090 GN=Brk1 PE=1 SV=1	8	3	Brk1	0.771	0.166953	High	High	High	Peak Found	High	High	Peak Found	High	High	Peak Found
High	Master Protein	Q8R420	ATP-binding cassette sub-family A member 3 OS=Mus musculus OX=10090 GN=Abca3 PE=1 SV=3	13	4	Abca3	1.364	0.169696	High	High	High	Peak Found	High	High	Peak Found	High	High	High
High	Master Protein	A0A0R4J2B2	BTB/POZ domain-containing protein KCTD12 OS=Mus musculus OX=10090 GN=Kctd12 PE=1 SV=1	143	17	Kctd12	0.849	0.171382	High	High	High	High	High	High	High	High	High	High
High	Master Protein	Q8C2Q3	RNA-binding protein 14 OS=Mus musculus OX=10090 GN=Rbm14 PE=1 SV=1	7	2	Rbm14	0.703	0.174584	High	High	Peak Found	High	Peak Found	Peak Found	High	High	High	High
High	Master Protein	Q8BGB5	LIM domain-containing protein 2 OS=Mus musculus OX=10090 GN=Limd2 PE=1 SV=1	10	2	Limd2	0.758	0.179422	Peak Found	High	Peak Found	High	High	High	High	High	High	Peak Found
High	Master Protein	P0DP27	Calmodulin-2 OS=Mus musculus OX=10090 GN=Calm2 PE=1 SV=1	417	6	Calm2	0.873	0.179576	High	High	High	High	High	High	High	High	High	High
High	Master Protein	V9GXM1	ADP-ribosylation factor GTPase-activating protein 1 OS=Mus musculus OX=10090 GN=Arfgap1 PE=1 SV=1	293	18	Arfgap1	0.865	0.179576	High	High	High	High	High	High	High	High	High	High
High	Master Protein	Q91W61	F-box/LRR-repeat protein 15 OS=Mus musculus OX=10090 GN=Fbxl15 PE=1 SV=2	9	6	Fbxl15	1.328	0.180114	High	High	High	High	Peak Found	High	Peak Found	High	High	High
High	Master Protein	P70362	Ubiquitin recognition factor in ER-associated degradation protein 1 OS=Mus musculus OX=10090 GN=Ufd1 PE=1 SV=2	28	4	Ufd1	0.757	0.181984	High	High	High	High	High	High	High	High	High	High
High	Master Protein	Q9EQP2	EH domain-containing protein 4 OS=Mus musculus OX=10090 GN=Ehd4 PE=1 SV=1	111	17	Ehd4	0.844	0.182663	High	High	High	High	High	High	High	High	High	High
High	Master Protein	O35083	1-acyl-sn-glycerol-3-phosphate acyltransferase alpha OS=Mus musculus OX=10090 GN=Agpat1 PE=1 SV=1	41	5	Agpat1	0.807	0.183871	High	High	High	High	High	High	High	High	High	High
High	Master Protein	Q8C413	Diacylglycerol kinase OS=Mus musculus OX=10090 GN=Dgkg PE=1 SV=1	30	10	Dgkg	1.174	0.186089	High	High	High	High	High	High	High	High	High	High
High	Master Protein	P63115	Asc-type amino acid transporter 1 OS=Mus musculus OX=10090 GN=Slc7a10 PE=1 SV=1	29	4	Slc7a10	0.859	0.188191	High	High	High	High	High	High	High	High	High	High
High	Master Protein	Q8BHH2	Ras-related protein Rab-9B OS=Mus musculus OX=10090 GN=Rab9b PE=1 SV=1	16	2	Rab9b	0.664	0.189914	Peak Found	High	High	High	Peak Found	High	High	High	High	High
High	Master Protein	P62748	Hippocalcin-like protein 1 OS=Mus musculus OX=10090 GN=Hpcal1 PE=1 SV=2	102	7	Hpcal1	0.854	0.190751	High	High	High	High	High	High	High	High	High	High
High	Master Protein	P70372	ELAV-like protein 1 OS=Mus musculus OX=10090 GN=Elavl1 PE=1 SV=2	20	6	Elavl1	0.853	0.192595	High	Peak Found	High	High	High	High	High	High	High	Peak Found
High	Master Protein	Q8VCV1	Alpha/beta hydrolase domain-containing protein 17C OS=Mus musculus OX=10090 GN=Abhd17c PE=1 SV=2	3	2	Abhd17c	0.599	0.193305	Not Found	Peak Found	Not Found	Not Found	Peak Found	Not Found	High	High	Not Found	High
High	Master Protein	Q8R0N6	Hydroxyacid-oxoacid transhydrogenase, mitochondrial OS=Mus musculus OX=10090 GN=Adhfe1 PE=1 SV=2	12	2	Adhfe1	1.313	0.193623	High	High	High	High	High	High	High	High	High	High
High	Master Protein	D3Z600	PTS1-BP OS=Mus musculus OX=10090 GN=Pex5 PE=1 SV=1	31	7	Pex5	1.16	0.193623	High	High	High	High	High	Peak Found	High	High	High	High
High	Master Protein	Q78JE5	F-box only protein 22 OS=Mus musculus OX=10090 GN=Fbxo22 PE=1 SV=2	5	2	Fbxo22	1.592	0.194301	Peak Found	High	High	High	Peak Found	Peak Found	Peak Found	High	Peak Found	High
High	Master Protein	Q8BFZ3	Beta-actin-like protein 2 OS=Mus musculus OX=10090 GN=Actbl2 PE=1 SV=1	1733	4	Actbl2	1.142	0.195031	High	High	High	High	High	High	High	High	High	High
High	Master Protein	Q9WUM5	Succinate--CoA ligase [ADP/GDP-forming] subunit alpha, mitochondrial OS=Mus musculus OX=10090 GN=Suclg1 PE=1 SV=4	268	11	Suclg1	1.141	0.195031	High	High	High	High	High	High	High	High	High	High
High	Master Protein	P62843	40S ribosomal protein S15 OS=Mus musculus OX=10090 GN=Rps15 PE=1 SV=2	56	4	Rps15	0.82	0.19701	High	High	High	High	High	High	High	High	High	High
High	Master Protein	O88533	Aromatic-L-amino-acid decarboxylase OS=Mus musculus OX=10090 GN=Ddc PE=1 SV=1	10	5	Ddc	0.712	0.206539	High	Peak Found	High	High	Peak Found	High	Peak Found	High	High	High
High	Master Protein	Q9CQ62	2,4-dienoyl-CoA reductase, mitochondrial OS=Mus musculus OX=10090 GN=Decr1 PE=1 SV=1	72	10	Decr1	1.134	0.213015	High	High	High	High	High	High	High	High	High	High
High	Master Protein	Q9D0M5	Dynein light chain 2, cytoplasmic OS=Mus musculus OX=10090 GN=Dynll2 PE=1 SV=1	295	4	Dynll2	0.878	0.216106	High	High	High	High	High	High	High	High	High	High
High	Master Protein	Q6QWF9	Calcium/calmodulin-dependent protein kinase II inhibitor 1 OS=Mus musculus OX=10090 GN=Camk2n1 PE=1 SV=1	21	3	Camk2n1	1.234	0.221442	High	High	High	High	High	High	High	High	High	High
High	Master Protein	Q3UMB9	WASH complex subunit 4 OS=Mus musculus OX=10090 GN=Washc4 PE=1 SV=2	3	3	Washc4	1.284	0.221871	Peak Found	Peak Found	High	Peak Found	Peak Found	Peak Found	High	Peak Found	High	Peak Found
High	Master Protein	Q8CHP5	Partner of Y14 and mago OS=Mus musculus OX=10090 GN=Pym1 PE=1 SV=2	18	6	Pym1	0.769	0.224837	High	High	High	High	High	High	High	Peak Found	High	High
High	Master Protein	Q6QD59	Vesicle transport protein SEC20 OS=Mus musculus OX=10090 GN=Bnip1 PE=1 SV=1	10	5	Bnip1	1.379	0.225219	Peak Found	High	High	Peak Found	High	High	High	High	High	High
High	Master Protein	Q80UU9	Membrane-associated progesterone receptor component 2 OS=Mus musculus OX=10090 GN=Pgrmc2 PE=1 SV=2	76	8	Pgrmc2	1.162	0.225911	High	High	High	High	High	High	High	High	High	High
High	Master Protein	Q9JIY5	Serine protease HTRA2, mitochondrial OS=Mus musculus OX=10090 GN=Htra2 PE=1 SV=2	54	8	Htra2	1.13	0.226831	High	High	High	High	High	High	High	High	High	High
High	Master Protein	Q9CQC9	GTP-binding protein SAR1b OS=Mus musculus OX=10090 GN=Sar1b PE=1 SV=1	18	4	Sar1b	0.774	0.229647	High	High	Peak Found	High	Peak Found	High	High	High	High	High
High	Master Protein	Q64332	Synapsin-2 OS=Mus musculus OX=10090 GN=Syn2 PE=1 SV=2	993	22	Syn2	0.879	0.229992	High	High	High	High	High	High	High	High	High	High
High	Master Protein	Q2WF71	Leucine-rich repeat and fibronectin type III domain-containing protein 1 OS=Mus musculus OX=10090 GN=Lrfn1 PE=1 SV=1	9	4	Lrfn1	1.134	0.232938	High	High	High	High	High	High	Peak Found	High	Peak Found	Peak Found
High	Master Protein	Q91YJ5	Translation initiation factor IF-2, mitochondrial OS=Mus musculus OX=10090 GN=Mtif2 PE=1 SV=2	28	6	Mtif2	1.216	0.234302	High	High	High	High	High	High	High	High	High	High
High	Master Protein	Q62283	Tetraspanin-7 OS=Mus musculus OX=10090 GN=Tspan7 PE=1 SV=2	91	3	Tspan7	0.861	0.240764	High	High	High	High	High	High	High	High	High	High
High	Master Protein	P50114	Protein S100-B OS=Mus musculus OX=10090 GN=S100b PE=1 SV=2	62	5	S100b	1.134	0.241005	High	High	High	High	High	High	High	High	High	High
High	Master Protein	Q99KR6	E3 ubiquitin-protein ligase RNF34 OS=Mus musculus OX=10090 GN=Rnf34 PE=1 SV=1	11	4	Rnf34	0.715	0.242324	High	Peak Found	Peak Found	Peak Found	High	High	High	High	High	High
High	Master Protein	A6H8H5	Potassium voltage-gated channel subfamily B member 2 OS=Mus musculus OX=10090 GN=Kcnb2 PE=1 SV=2	7	2	Kcnb2	1.417	0.243668	High	Peak Found	High	Peak Found	High	Peak Found	Peak Found	High	Peak Found	Peak Found
High	Master Protein	Q52KR3	Protein prune homolog 2 OS=Mus musculus OX=10090 GN=Prune2 PE=1 SV=2	24	6	Prune2	0.819	0.243689	High	High	High	High	High	High	High	High	High	High
High	Master Protein	Q8BFR5	Elongation factor Tu, mitochondrial OS=Mus musculus OX=10090 GN=Tufm PE=1 SV=1	307	26	Tufm	1.133	0.251718	High	High	High	High	High	High	High	High	High	High
High	Master Protein	Q9D1K2	V-type proton ATPase subunit F OS=Mus musculus OX=10090 GN=Atp6v1f PE=1 SV=2	49	6	Atp6v1f	0.856	0.25428	High	High	High	High	High	High	High	High	High	High
High	Master Protein	Q9Z0L0	Trophoblast glycoprotein OS=Mus musculus OX=10090 GN=Tpbg PE=1 SV=3	11	3	Tpbg	0.807	0.254607	Peak Found	Peak Found	High	High	High	High	High	High	High	High
High	Master Protein	D3YWT0	Signal peptidase complex catalytic subunit SEC11 OS=Mus musculus OX=10090 GN=Sec11a PE=1 SV=1	9	2	Sec11a	0.714	0.256061	High	High	High	High	High	Peak Found	High	High	High	High
High	Master Protein	P61329	Fibroblast growth factor 12 OS=Mus musculus OX=10090 GN=Fgf12 PE=1 SV=1	17	3	Fgf12	0.777	0.261255	High	High	High	High	High	High	High	High	High	High
High	Master Protein	P56564	Excitatory amino acid transporter 1 OS=Mus musculus OX=10090 GN=Slc1a3 PE=1 SV=2	476	10	Slc1a3	0.883	0.262413	High	High	High	High	High	High	High	High	High	High
High	Master Protein	Q62313	Trans-Golgi network integral membrane protein 1 OS=Mus musculus OX=10090 GN=Tgoln1 PE=1 SV=1	10	3	Tgoln1	1.391	0.263894	High	High	High	High	High	Peak Found	Peak Found	Peak Found	High	High
High	Master Protein	Q99LC5	Electron transfer flavoprotein subunit alpha, mitochondrial OS=Mus musculus OX=10090 GN=Etfa PE=1 SV=2	199	14	Etfa	1.131	0.263894	High	High	High	High	High	High	High	High	High	High
High	Master Protein	Q925N0	Sideroflexin-5 OS=Mus musculus OX=10090 GN=Sfxn5 PE=1 SV=2	207	14	Sfxn5	1.131	0.265643	High	High	High	High	High	High	High	High	High	High
High	Master Protein	G3XA18	N-acylethanolamine-hydrolyzing acid amidase OS=Mus musculus OX=10090 GN=Naaa PE=1 SV=1	3	2	Naaa	1.354	0.266167	High	Peak Found	Peak Found	Peak Found	High	Peak Found	Peak Found	Peak Found	High	Peak Found
High	Master Protein	P62274	40S ribosomal protein S29 OS=Mus musculus OX=10090 GN=Rps29 PE=1 SV=2	25	2	Rps29	0.822	0.268019	High	High	High	High	High	High	High	High	High	High
High	Master Protein	O70200	Allograft inflammatory factor 1 OS=Mus musculus OX=10090 GN=Aif1 PE=1 SV=1	11	2	Aif1	0.716	0.26861	High	High	High	High	High	High	High	High	High	High
High	Master Protein	A0A087WQF0	Phospholipid phosphatase-related protein type 2 OS=Mus musculus OX=10090 GN=Plppr2 PE=1 SV=1	35	6	Plppr2	0.819	0.27159	High	High	High	High	High	High	High	High	High	High
High	Master Protein	P84244	Histone H3.3 OS=Mus musculus OX=10090 GN=H3-3a PE=1 SV=2	16	2	H3-3a; H3-3b	1.349	0.275719	Peak Found	High	High	High	Peak Found	High	High	High	High	High
High	Master Protein	P10126	Elongation factor 1-alpha 1 OS=Mus musculus OX=10090 GN=Eef1a1 PE=1 SV=3	411	10	Eef1a1	0.884	0.275719	High	High	High	High	High	High	High	High	High	High
High	Master Protein	P68040	Receptor of activated protein C kinase 1 OS=Mus musculus OX=10090 GN=Rack1 PE=1 SV=3	131	15	Rack1	0.862	0.275719	High	High	High	High	High	High	High	High	High	High
High	Master Protein	P29758	Ornithine aminotransferase, mitochondrial OS=Mus musculus OX=10090 GN=Oat PE=1 SV=1	158	16	Oat	1.126	0.275719	High	High	High	High	High	High	High	High	High	High
High	Master Protein	Q9Z110	Delta-1-pyrroline-5-carboxylate synthase OS=Mus musculus OX=10090 GN=Aldh18a1 PE=1 SV=2	56	16	Aldh18a1	1.155	0.275719	High	High	High	High	High	High	High	High	High	High
High	Master Protein	Q08331	Calretinin OS=Mus musculus OX=10090 GN=Calb2 PE=1 SV=3	134	17	Calb2	0.873	0.275719	High	High	High	High	High	High	High	High	High	High
High	Master Protein	Q8BH55	Threonine synthase-like 1 OS=Mus musculus OX=10090 GN=Thnsl1 PE=1 SV=1	147	22	Thnsl1	1.122	0.275719	High	High	High	High	High	High	High	High	High	High
High	Master Protein	Q99JB8	Protein kinase C and casein kinase II substrate protein 3 OS=Mus musculus OX=10090 GN=Pacsin3 PE=1 SV=1	20	6	Pacsin3	0.752	0.275784	High	High	Peak Found	High	High	High	High	High	High	High
High	Master Protein	Q61553	Fascin OS=Mus musculus OX=10090 GN=Fscn1 PE=1 SV=4	279	25	Fscn1	0.885	0.279228	High	High	High	High	High	High	High	High	High	High
High	Master Protein	P38647	Stress-70 protein, mitochondrial OS=Mus musculus OX=10090 GN=Hspa9 PE=1 SV=3	828	41	Hspa9	1.128	0.285888	High	High	High	High	High	High	High	High	High	High
High	Master Protein	Q8K3J1	NADH dehydrogenase [ubiquinone] iron-sulfur protein 8, mitochondrial OS=Mus musculus OX=10090 GN=Ndufs8 PE=1 SV=1	173	10	Ndufs8	1.119	0.286211	High	High	High	High	High	High	High	High	High	High
High	Master Protein	P08551	Neurofilament light polypeptide OS=Mus musculus OX=10090 GN=Nefl PE=1 SV=5	285	23	Nefl	1.128	0.286669	High	High	High	High	High	High	High	High	High	High
High	Master Protein	Q8QZY1	Eukaryotic translation initiation factor 3 subunit L OS=Mus musculus OX=10090 GN=Eif3l PE=1 SV=1	93	15	Eif3l	0.855	0.288928	High	High	High	High	High	High	High	High	High	High
High	Master Protein	Q9Z0J0	NPC intracellular cholesterol transporter 2 OS=Mus musculus OX=10090 GN=Npc2 PE=1 SV=1	9	3	Npc2	1.239	0.288994	High	Peak Found	High	High	High	High	Peak Found	High	High	Peak Found
High	Master Protein	Q8BH95	Enoyl-CoA hydratase, mitochondrial OS=Mus musculus OX=10090 GN=Echs1 PE=1 SV=1	203	15	Echs1	1.127	0.289391	High	High	High	High	High	High	High	High	High	High
High	Master Protein	Q3UGR5	Haloacid dehalogenase-like hydrolase domain-containing protein 2 OS=Mus musculus OX=10090 GN=Hdhd2 PE=1 SV=2	64	7	Hdhd2	0.853	0.293563	High	High	High	High	High	High	High	High	High	High
High	Master Protein	O08585	Clathrin light chain A OS=Mus musculus OX=10090 GN=Clta PE=1 SV=2	100	2	Clta	0.876	0.295083	High	High	High	Peak Found	High	High	High	High	High	High
High	Master Protein	A2A9I0	Golgi SNAP receptor complex member 2 OS=Mus musculus OX=10090 GN=Gosr2 PE=1 SV=1	6	2	Gosr2	0.76	0.29617	High	Peak Found	High	High	High	High	Not Found	Peak Found	High	Peak Found
High	Master Protein	Q8BSH9	Nucleosome assembly protein 1-like 1 OS=Mus musculus OX=10090 GN=Nap1l1 PE=1 SV=1	117	10	Nap1l1	0.866	0.29617	High	High	High	High	High	High	High	High	High	High
High	Master Protein	Q9CZN7	Serine hydroxymethyltransferase, mitochondrial OS=Mus musculus OX=10090 GN=Shmt2 PE=1 SV=1	56	11	Shmt2	1.154	0.298034	High	High	High	High	High	High	High	High	High	High
High	Master Protein	P50153	Guanine nucleotide-binding protein G(I)/G(S)/G(O) subunit gamma-4 OS=Mus musculus OX=10090 GN=Gng4 PE=1 SV=1	65	5	Gng4	0.837	0.298356	High	High	High	High	High	High	High	High	High	High
High	Master Protein	Q9CXJ4	Mitochondrial potassium channel ATP-binding subunit OS=Mus musculus OX=10090 GN=Abcb8 PE=1 SV=1	53	12	Abcb8	1.155	0.298356	High	High	High	High	High	High	High	High	High	High
High	Master Protein	Q06890	Clusterin OS=Mus musculus OX=10090 GN=Clu PE=1 SV=1	77	12	Clu	1.126	0.300239	High	High	High	High	High	High	High	High	High	High
High	Master Protein	P56394	Cytochrome c oxidase copper chaperone OS=Mus musculus OX=10090 GN=Cox17 PE=1 SV=2	12	2	Cox17	1.343	0.305005	High	Peak Found	High	High	High	High	High	High	High	Peak Found
High	Master Protein	P97855	Ras GTPase-activating protein-binding protein 1 OS=Mus musculus OX=10090 GN=G3bp1 PE=1 SV=1	44	8	G3bp1	0.825	0.310797	High	High	High	High	High	High	High	High	High	High
High	Master Protein	Q8VEH3	ADP-ribosylation factor-like protein 8A OS=Mus musculus OX=10090 GN=Arl8a PE=1 SV=1	106	3	Arl8a	1.185	0.312505	High	High	High	High	High	High	High	High	High	High
High	Master Protein	P41241	Tyrosine-protein kinase CSK OS=Mus musculus OX=10090 GN=Csk PE=1 SV=2	15	5	Csk	0.763	0.312505	High	Peak Found	Peak Found	Peak Found	Peak Found	High	High	High	High	High
High	Master Protein	P60202	Myelin proteolipid protein OS=Mus musculus OX=10090 GN=Plp1 PE=1 SV=2	345	7	Plp1	1.125	0.312505	High	High	High	High	High	High	High	High	High	High
High	Master Protein	Q6P8N8	ATP-dependent Clp protease ATP-binding subunit clpX-like, mitochondrial OS=Mus musculus OX=10090 GN=Clpx PE=1 SV=1	38	10	Clpx	1.165	0.312505	High	High	High	High	High	High	High	High	High	High
High	Master Protein	Q03517	Secretogranin-2 OS=Mus musculus OX=10090 GN=Scg2 PE=1 SV=1	45	10	Scg2	0.827	0.314296	High	High	High	High	High	High	High	High	High	High
High	Master Protein	P63028	Translationally-controlled tumor protein OS=Mus musculus OX=10090 GN=Tpt1 PE=1 SV=1	171	7	Tpt1	0.88	0.314379	High	High	High	High	High	High	High	High	High	High
High	Master Protein	Q01065	Calcium/calmodulin-dependent 3',5'-cyclic nucleotide phosphodiesterase 1B OS=Mus musculus OX=10090 GN=Pde1b PE=1 SV=2	151	17	Pde1b	0.865	0.316636	High	High	High	High	High	High	High	High	High	High
High	Master Protein	Q9CPR4	60S ribosomal protein L17 OS=Mus musculus OX=10090 GN=Rpl17 PE=1 SV=3	69	6	Rpl17	0.866	0.31688	High	High	High	High	High	High	High	High	High	High
High	Master Protein	Q9D1A2	Cytosolic non-specific dipeptidase OS=Mus musculus OX=10090 GN=Cndp2 PE=1 SV=1	208	26	Cndp2	0.877	0.318003	High	High	High	High	High	High	High	High	High	High
High	Master Protein	A0A140LIF0	5-demethoxyubiquinone hydroxylase, mitochondrial OS=Mus musculus OX=10090 GN=Coq7 PE=1 SV=1	20	5	Coq7	1.21	0.318659	High	High	High	High	High	High	High	High	High	High
High	Master Protein	P0C7L0	WAS/WASL-interacting protein family member 3 OS=Mus musculus OX=10090 GN=Wipf3 PE=1 SV=1	63	7	Wipf3	0.841	0.319403	High	High	High	High	High	High	High	High	High	High
High	Master Protein	Q9DD02	Protein Hikeshi OS=Mus musculus OX=10090 GN=Hikeshi PE=1 SV=1	3	2	Hikeshi	0.711	0.326115	Peak Found	Peak Found	Peak Found	Peak Found	Peak Found	High	Peak Found	Peak Found	High	Peak Found
High	Master Protein	Q8CC88	von Willebrand factor A domain-containing protein 8 OS=Mus musculus OX=10090 GN=Vwa8 PE=1 SV=2	126	28	Vwa8	1.117	0.326115	High	High	High	High	High	High	High	High	High	High
High	Master Protein	Q9ES74	Serine/threonine-protein kinase Nek7 OS=Mus musculus OX=10090 GN=Nek7 PE=1 SV=1	12	3	Nek7	1.151	0.326692	High	Peak Found	High	High	High	High	High	High	High	High
High	Master Protein	P61967	AP-1 complex subunit sigma-1A OS=Mus musculus OX=10090 GN=Ap1s1 PE=1 SV=1	41	4	Ap1s1	0.831	0.330655	High	High	High	High	High	High	High	High	High	High
High	Master Protein	F6QA74	DNA-(apurinic or apyrimidinic site) endonuclease (Fragment) OS=Mus musculus OX=10090 GN=Apex1 PE=1 SV=1	19	3	Apex1	0.78	0.330806	High	High	High	High	High	High	High	High	High	High
High	Master Protein	Q64444	Carbonic anhydrase 4 OS=Mus musculus OX=10090 GN=Ca4 PE=1 SV=1	34	5	Ca4	1.16	0.331428	High	High	High	High	High	High	High	High	High	High
High	Master Protein	G5E8F1	Integrin alpha-M OS=Mus musculus OX=10090 GN=Itgam PE=1 SV=2	7	5	Itgam	0.746	0.331428	Peak Found	Peak Found	Peak Found	Peak Found	Peak Found	High	Peak Found	High	High	High
High	Master Protein	Q8VEK0	Cell cycle control protein 50A OS=Mus musculus OX=10090 GN=Tmem30a PE=1 SV=1	93	10	Tmem30a	0.866	0.333041	High	High	High	High	High	High	High	High	High	High
High	Master Protein	P54728	UV excision repair protein RAD23 homolog B OS=Mus musculus OX=10090 GN=Rad23b PE=1 SV=2	68	9	Rad23b	1.122	0.333058	High	High	High	High	High	High	High	High	High	High
High	Master Protein	A2AEG6	Neuronal membrane glycoprotein M6-b OS=Mus musculus OX=10090 GN=Gpm6b PE=1 SV=1	165	11	Gpm6b	0.891	0.335348	High	High	High	High	High	High	High	High	High	High
High	Master Protein	E9Q8I7	Nuclear transcription factor, X-box-binding-like 1 OS=Mus musculus OX=10090 GN=Nfxl1 PE=1 SV=1	2	2	Nfxl1	0.636	0.336542	Not Found	Not Found	Peak Found	Peak Found	Peak Found	Peak Found	High	Not Found	Peak Found	Not Found
High	Master Protein	Q9CWD8	Iron-sulfur protein NUBPL OS=Mus musculus OX=10090 GN=Nubpl PE=1 SV=2	11	4	Nubpl	1.258	0.336667	High	High	High	High	Peak Found	High	High	High	High	Peak Found
High	Master Protein	P69566	Ran-binding protein 9 OS=Mus musculus OX=10090 GN=Ranbp9 PE=1 SV=1	36	10	Ranbp9	1.178	0.336667	High	High	High	High	High	High	High	High	High	High
High	Master Protein	Q9D023	Mitochondrial pyruvate carrier 2 OS=Mus musculus OX=10090 GN=Mpc2 PE=1 SV=1	77	6	Mpc2	1.122	0.33671	High	High	High	High	High	High	High	High	High	High
High	Master Protein	Q9DCW4	Electron transfer flavoprotein subunit beta OS=Mus musculus OX=10090 GN=Etfb PE=1 SV=3	142	16	Etfb	1.107	0.344633	High	High	High	High	High	High	High	High	High	High
High	Master Protein	Q8C0D5	Elongation factor-like GTPase 1 OS=Mus musculus OX=10090 GN=Efl1 PE=1 SV=1	21	7	Efl1	0.774	0.345452	High	High	Peak Found	High	High	High	High	High	High	High
High	Master Protein	O08648	Mitogen-activated protein kinase kinase kinase 4 OS=Mus musculus OX=10090 GN=Map3k4 PE=1 SV=2	3	3	Map3k4	0.625	0.34701	Peak Found	High	Peak Found	Peak Found	Peak Found	Peak Found	Peak Found	High	Peak Found	High
High	Master Protein	Q8BMA6	Signal recognition particle subunit SRP68 OS=Mus musculus OX=10090 GN=Srp68 PE=1 SV=2	8	4	Srp68	0.777	0.34701	Peak Found	High	Peak Found	High	High	High	High	High	High	Peak Found
High	Master Protein	Q9D5T0	ATPase family AAA domain-containing protein 1 OS=Mus musculus OX=10090 GN=Atad1 PE=1 SV=1	115	11	Atad1	1.114	0.34701	High	High	High	High	High	High	High	High	High	High
High	Master Protein	Q8BYH7	TBC1 domain family member 17 OS=Mus musculus OX=10090 GN=Tbc1d17 PE=1 SV=2	6	3	Tbc1d17	1.174	0.347527	Peak Found	High	Peak Found	Peak Found	Peak Found	High	Peak Found	High	High	High
High	Master Protein	Q8CA95	cAMP and cAMP-inhibited cGMP 3',5'-cyclic phosphodiesterase 10A OS=Mus musculus OX=10090 GN=Pde10a PE=1 SV=2	46	12	Pde10a	0.83	0.347527	High	Peak Found	High	High	Peak Found	High	Peak Found	High	High	High
High	Master Protein	P62245	40S ribosomal protein S15a OS=Mus musculus OX=10090 GN=Rps15a PE=1 SV=2	49	6	Rps15a	0.847	0.349606	High	High	High	High	High	High	High	High	High	High
High	Master Protein	Q9JHI5	Isovaleryl-CoA dehydrogenase, mitochondrial OS=Mus musculus OX=10090 GN=Ivd PE=1 SV=1	130	16	Ivd	1.119	0.349606	High	High	High	High	High	High	High	High	High	High
High	Master Protein	P97351	40S ribosomal protein S3a OS=Mus musculus OX=10090 GN=Rps3a PE=1 SV=3	168	17	Rps3a	0.878	0.349606	High	High	High	High	High	High	High	High	High	High
High	Master Protein	A0A0J9YTS4	Tetraspanin (Fragment) OS=Mus musculus OX=10090 GN=Tspan9 PE=1 SV=1	11	2	Tspan9	0.792	0.352035	High	High	Peak Found	High	High	High	Peak Found	High	High	High
High	Master Protein	P97825	Jupiter microtubule associated homolog 1 OS=Mus musculus OX=10090 GN=Jpt1 PE=1 SV=3	26	3	Jpt1	0.823	0.352731	High	High	High	High	High	High	High	High	High	High
High	Master Protein	Q921S7	39S ribosomal protein L37, mitochondrial OS=Mus musculus OX=10090 GN=Mrpl37 PE=1 SV=1	17	7	Mrpl37	1.173	0.354214	High	High	High	High	High	Peak Found	High	High	High	High
High	Master Protein	Q9WUR9	Adenylate kinase 4, mitochondrial OS=Mus musculus OX=10090 GN=Ak4 PE=1 SV=1	192	11	Ak4	1.106	0.354214	High	High	High	High	High	High	High	High	High	High
High	Master Protein	Q8BHZ0	CYFIP-related Rac1 interactor A OS=Mus musculus OX=10090 GN=Cyria PE=1 SV=1	113	8	Cyria	0.841	0.355461	High	High	High	High	High	High	High	High	High	High
High	Master Protein	Q03265	ATP synthase subunit alpha, mitochondrial OS=Mus musculus OX=10090 GN=Atp5f1a PE=1 SV=1	2023	44	Atp5f1a	1.119	0.355461	High	High	High	High	High	High	High	High	High	High
High	Master Protein	Q9D8X2	Coiled-coil domain-containing protein 124 OS=Mus musculus OX=10090 GN=Ccdc124 PE=1 SV=1	16	3	Ccdc124	0.756	0.359436	High	High	High	High	High	High	High	High	High	High
High	Master Protein	Q9ERZ3	Muscarinic acetylcholine receptor M3 OS=Mus musculus OX=10090 GN=Chrm3 PE=1 SV=1	30	5	Chrm3	1.244	0.359473	High	High	High	High	High	Peak Found	High	High	High	High
High	Master Protein	P31324	cAMP-dependent protein kinase type II-beta regulatory subunit OS=Mus musculus OX=10090 GN=Prkar2b PE=1 SV=3	263	19	Prkar2b	0.893	0.359473	High	High	High	High	High	High	High	High	High	High
High	Master Protein	Q8BG39	Synaptic vesicle glycoprotein 2B OS=Mus musculus OX=10090 GN=Sv2b PE=1 SV=1	300	15	Sv2b	0.893	0.360238	High	High	High	High	High	High	High	High	High	High
High	Master Protein	Q9CZT8	Ras-related protein Rab-3B OS=Mus musculus OX=10090 GN=Rab3b PE=1 SV=1	244	6	Rab3b	0.871	0.361171	High	High	High	High	High	High	High	High	High	High
High	Master Protein	A0A1L1SR96	Anoctamin OS=Mus musculus OX=10090 GN=Ano8 PE=1 SV=1	8	2	Ano8	1.114	0.365828	High	High	High	High	High	High	Peak Found	High	High	Peak Found
High	Master Protein	Q8K4Z3	NAD(P)H-hydrate epimerase OS=Mus musculus OX=10090 GN=Naxe PE=1 SV=1	129	11	Naxe	1.11	0.365828	High	High	High	High	High	High	High	High	High	High
High	Master Protein	Q8BMJ2	Leucine--tRNA ligase, cytoplasmic OS=Mus musculus OX=10090 GN=Lars1 PE=1 SV=2	91	20	Lars1	0.847	0.365828	High	High	High	High	High	High	High	High	High	High
High	Master Protein	Q8CBE3	WD repeat-containing protein 37 OS=Mus musculus OX=10090 GN=Wdr37 PE=1 SV=1	120	16	Wdr37	0.867	0.366337	High	High	High	High	High	High	High	High	High	High
High	Master Protein	P23591	GDP-L-fucose synthase OS=Mus musculus OX=10090 GN=Tsta3 PE=1 SV=3	13	3	Gfus	0.791	0.366897	Peak Found	Peak Found	High	High	High	High	High	High	High	High
High	Master Protein	P84086	Complexin-2 OS=Mus musculus OX=10090 GN=Cplx2 PE=1 SV=1	189	6	Cplx2	1.118	0.366897	High	High	High	High	High	High	High	High	High	High
High	Master Protein	E9Q456	Tropomyosin alpha-1 chain OS=Mus musculus OX=10090 GN=Tpm1 PE=1 SV=1	176	9	Tpm1	1.117	0.366897	High	High	High	High	High	High	High	High	High	High
High	Master Protein	Q9DCJ9	N-acetylneuraminate lyase OS=Mus musculus OX=10090 GN=Npl PE=1 SV=1	7	4	Npl	0.736	0.367189	High	Peak Found	Peak Found	Peak Found	Peak Found	High	Peak Found	High	High	Peak Found
High	Master Protein	Q8VDP3	[F-actin]-monooxygenase MICAL1 OS=Mus musculus OX=10090 GN=Mical1 PE=1 SV=1	5	2	Mical1	0.651	0.371435	High	Peak Found	High	High	Not Found	Peak Found	High	High	Peak Found	Peak Found
High	Master Protein	Q3U2I3	FTS and Hook-interacting protein OS=Mus musculus OX=10090 GN=Fam160a2 PE=1 SV=2	5	3	Fam160a2	1.165	0.375043	High	High	Peak Found	High	Peak Found	High	Peak Found	Peak Found	Peak Found	Peak Found
High	Master Protein	Q8BWT1	3-ketoacyl-CoA thiolase, mitochondrial OS=Mus musculus OX=10090 GN=Acaa2 PE=1 SV=3	212	21	Acaa2	1.116	0.375043	High	High	High	High	High	High	High	High	High	High
High	Master Protein	Q9CQN1	Heat shock protein 75 kDa, mitochondrial OS=Mus musculus OX=10090 GN=Trap1 PE=1 SV=1	181	22	Trap1	1.116	0.375627	High	High	High	High	High	High	High	High	High	High
High	Master Protein	Q9CZD3	Glycine--tRNA ligase OS=Mus musculus OX=10090 GN=Gars1 PE=1 SV=1	118	22	Gars1	0.871	0.376861	High	High	High	High	High	High	High	High	High	High
High	Master Protein	Q9CYR6	Phosphoacetylglucosamine mutase OS=Mus musculus OX=10090 GN=Pgm3 PE=1 SV=1	50	10	Pgm3	1.167	0.377262	High	High	High	High	High	High	High	High	High	High
High	Master Protein	Q8R1F1	Protein Niban 2 OS=Mus musculus OX=10090 GN=Niban2 PE=1 SV=2	7	3	Niban2	1.207	0.37796	Peak Found	Peak Found	High	High	High	Peak Found	High	Peak Found	Peak Found	High
High	Master Protein	F7ABZ6	Dynein, axonemal, heavy chain 10 OS=Mus musculus OX=10090 GN=Dnah10 PE=1 SV=2	7	2	Dnah10	1.313	0.378009	Peak Found	High	High	High	Peak Found	High	High	High	High	Peak Found
High	Master Protein	P26049	Gamma-aminobutyric acid receptor subunit alpha-3 OS=Mus musculus OX=10090 GN=Gabra3 PE=1 SV=1	96	8	Gabra3	1.113	0.378009	High	High	High	High	High	High	High	High	High	High
High	Master Protein	Q9D104	Signal recognition particle 19 kDa protein OS=Mus musculus OX=10090 GN=Srp19 PE=1 SV=1	6	2	Srp19	0.742	0.380917	High	High	High	Peak Found	Peak Found	High	High	Peak Found	Peak Found	High
High	Master Protein	P59759	Myocardin-related transcription factor B OS=Mus musculus OX=10090 GN=Mrtfb PE=1 SV=1	94	16	Mrtfb	0.895	0.380917	High	High	High	High	High	High	High	High	High	High
High	Master Protein	Q80U56	Late secretory pathway protein AVL9 homolog OS=Mus musculus OX=10090 GN=Avl9 PE=1 SV=2	69	11	Avl9	0.832	0.381611	High	High	High	High	High	High	High	High	High	High
High	Master Protein	B8JJ69	RIKEN cDNA 2310061I04 gene OS=Mus musculus OX=10090 GN=2310061I04Rik PE=1 SV=1	18	4	2310061I04Rik	1.197	0.381694	High	High	High	High	High	High	High	High	High	High
High	Master Protein	P85094	Isochorismatase domain-containing protein 2A OS=Mus musculus OX=10090 GN=Isoc2a PE=1 SV=1	70	6	Isoc2a	1.126	0.381701	High	High	High	High	High	High	High	High	High	High
High	Master Protein	P97441	Zinc transporter 3 OS=Mus musculus OX=10090 GN=Slc30a3 PE=1 SV=1	78	7	Slc30a3	0.87	0.384037	High	High	High	High	High	High	High	High	High	High
High	Master Protein	P63318	Protein kinase C gamma type OS=Mus musculus OX=10090 GN=Prkcg PE=1 SV=1	446	37	Prkcg	0.895	0.384037	High	High	High	High	High	High	High	High	High	High
High	Master Protein	Q8BI08	Protein MAL2 OS=Mus musculus OX=10090 GN=Mal2 PE=1 SV=1	29	2	Mal2	1.114	0.385303	High	High	High	High	High	High	High	High	High	High
High	Master Protein	Q60960	Importin subunit alpha-5 OS=Mus musculus OX=10090 GN=Kpna1 PE=1 SV=2	43	2	Kpna1	1.434	0.388599	High	High	High	High	High	High	High	High	High	High
High	Master Protein	Q9Z0V7	Mitochondrial import inner membrane translocase subunit Tim17-B OS=Mus musculus OX=10090 GN=Timm17b PE=1 SV=1	4	2	Timm17b	0.8	0.389543	Peak Found	Peak Found	High	Peak Found	Peak Found	High	High	Peak Found	High	Peak Found
High	Master Protein	P58242	Acid sphingomyelinase-like phosphodiesterase 3b OS=Mus musculus OX=10090 GN=Smpdl3b PE=1 SV=1	9	3	Smpdl3b	0.752	0.389543	Peak Found	Peak Found	Peak Found	High	Peak Found	High	High	High	High	High
High	Master Protein	A0A286YCT4	Signal sequence receptor subunit alpha OS=Mus musculus OX=10090 GN=Ssr1 PE=1 SV=1	33	3	Ssr1	1.17	0.389543	High	High	High	High	High	High	High	High	High	High
High	Master Protein	Q5U458	DnaJ homolog subfamily C member 11 OS=Mus musculus OX=10090 GN=Dnajc11 PE=1 SV=2	141	20	Dnajc11	1.107	0.389638	High	High	High	High	High	High	High	High	High	High
High	Master Protein	E9PUP9	Receptor protein-tyrosine kinase OS=Mus musculus OX=10090 GN=Epha5 PE=1 SV=1	17	2	Epha5	1.362	0.390549	Peak Found	High	Peak Found	Peak Found	High	High	Peak Found	Peak Found	High	Peak Found
High	Master Protein	Q8VE22	28S ribosomal protein S23, mitochondrial OS=Mus musculus OX=10090 GN=Mrps23 PE=1 SV=1	24	5	Mrps23	1.209	0.390549	High	High	High	High	High	High	High	High	High	High
High	Master Protein	Q9CX00	IST1 homolog OS=Mus musculus OX=10090 GN=Ist1 PE=1 SV=1	23	6	Ist1	1.164	0.390963	High	High	High	High	High	High	High	High	High	High
High	Master Protein	Q91VN4	MICOS complex subunit Mic25 OS=Mus musculus OX=10090 GN=Chchd6 PE=1 SV=2	128	2	Chchd6	1.114	0.394327	Peak Found	Peak Found	High	High	High	High	High	High	High	High
High	Master Protein	Q8CA72	Gigaxonin OS=Mus musculus OX=10090 GN=Gan PE=1 SV=2	7	3	Gan	0.722	0.394627	High	High	High	Peak Found	High	High	Peak Found	High	High	Peak Found
High	Master Protein	Q9JM63	ATP-sensitive inward rectifier potassium channel 10 OS=Mus musculus OX=10090 GN=Kcnj10 PE=1 SV=1	17	3	Kcnj10	1.16	0.395475	High	High	High	High	High	High	High	High	High	High
High	Master Protein	P60335	Poly(rC)-binding protein 1 OS=Mus musculus OX=10090 GN=Pcbp1 PE=1 SV=1	250	13	Pcbp1	0.896	0.395475	High	High	High	High	High	High	High	High	High	High
High	Master Protein	D3Z7H4	Germ cell-specific gene 1-like protein OS=Mus musculus OX=10090 GN=Gsg1l PE=1 SV=2	18	3	Gsg1l	1.277	0.399029	High	High	High	High	High	High	High	High	High	High
High	Master Protein	P08249	Malate dehydrogenase, mitochondrial OS=Mus musculus OX=10090 GN=Mdh2 PE=1 SV=3	938	24	Mdh2	1.114	0.399832	High	High	High	High	High	High	High	High	High	High
High	Master Protein	Q9DB10	Essential MCU regulator, mitochondrial OS=Mus musculus OX=10090 GN=Smdt1 PE=1 SV=1	11	3	Smdt1	0.748	0.399855	High	High	High	Peak Found	High	High	Peak Found	High	High	High
High	Master Protein	Q91VI7	Ribonuclease inhibitor OS=Mus musculus OX=10090 GN=Rnh1 PE=1 SV=1	158	21	Rnh1	0.878	0.399855	High	High	High	High	High	High	High	High	High	High
High	Master Protein	Q8R035	Peptidyl-tRNA hydrolase ICT1, mitochondrial OS=Mus musculus OX=10090 GN=Mrpl58 PE=1 SV=1	17	6	Mrpl58	1.23	0.400121	High	High	High	High	High	Peak Found	High	High	High	High
High	Master Protein	Q3UWE6	WD repeat-containing protein 20 OS=Mus musculus OX=10090 GN=Wdr20 PE=1 SV=1	33	7	Wdr20	1.167	0.40385	High	High	High	High	High	High	High	High	High	High
High	Master Protein	Q4VBD2	Transmembrane anterior posterior transformation protein 1 OS=Mus musculus OX=10090 GN=Tapt1 PE=1 SV=2	22	8	Tapt1	1.108	0.404756	High	High	High	High	Peak Found	High	High	High	High	High
High	Master Protein	Q8BR92	Paralemmin-2 OS=Mus musculus OX=10090 GN=Palm2 PE=1 SV=1	44	4	Palm2	1.114	0.406291	High	High	High	Peak Found	High	High	High	High	High	High
High	Master Protein	O88851	Putative hydrolase RBBP9 OS=Mus musculus OX=10090 GN=Rbbp9 PE=1 SV=2	87	8	Rbbp9	0.871	0.41049	High	High	High	High	High	High	High	High	High	High
High	Master Protein	P97490	Adenylate cyclase type 8 OS=Mus musculus OX=10090 GN=Adcy8 PE=1 SV=2	12	6	Adcy8	1.156	0.414645	High	High	High	Peak Found	High	High	Peak Found	Peak Found	High	High
High	Master Protein	P32848	Parvalbumin alpha OS=Mus musculus OX=10090 GN=Pvalb PE=1 SV=3	34	6	Pvalb	1.119	0.416544	High	High	High	High	High	High	High	High	High	High
High	Master Protein	Q3ULL6	UPF3 regulator of nonsense transcripts homolog B (yeast) OS=Mus musculus OX=10090 GN=Upf3b PE=1 SV=1	6	3	Upf3b	0.749	0.419463	Peak Found	Peak Found	Peak Found	High	Peak Found	Peak Found	High	High	High	Peak Found
High	Master Protein	P20108	Thioredoxin-dependent peroxide reductase, mitochondrial OS=Mus musculus OX=10090 GN=Prdx3 PE=1 SV=1	158	10	Prdx3	1.112	0.419463	High	High	High	High	High	High	High	High	High	High
High	Master Protein	P13020	Gelsolin OS=Mus musculus OX=10090 GN=Gsn PE=1 SV=3	75	14	Gsn	1.107	0.420635	High	High	High	High	High	High	High	High	High	High
High	Master Protein	P63085	Mitogen-activated protein kinase 1 OS=Mus musculus OX=10090 GN=Mapk1 PE=1 SV=3	237	20	Mapk1	0.899	0.420962	High	High	High	High	High	High	High	High	High	High
High	Master Protein	Q3U4S0	Pantothenate kinase 2 OS=Mus musculus OX=10090 GN=Pank2 PE=1 SV=1	20	5	Pank2	1.167	0.422313	High	High	High	High	High	High	High	High	High	High
High	Master Protein	P28867	Protein kinase C delta type OS=Mus musculus OX=10090 GN=Prkcd PE=1 SV=3	81	9	Prkcd	1.133	0.422951	High	High	High	High	High	High	High	High	High	High
High	Master Protein	Q69ZK0	Phosphatidylinositol 3,4,5-trisphosphate-dependent Rac exchanger 1 protein OS=Mus musculus OX=10090 GN=Prex1 PE=1 SV=2	69	18	Prex1	0.849	0.42381	High	High	High	High	High	High	High	High	High	High
High	Master Protein	V9GWW6	Muscular LMNA-interacting protein OS=Mus musculus OX=10090 GN=Mlip PE=1 SV=1	20	6	Mlip	1.121	0.424676	High	High	High	High	High	Peak Found	High	High	High	High
High	Master Protein	P62878	E3 ubiquitin-protein ligase RBX1 OS=Mus musculus OX=10090 GN=Rbx1 PE=1 SV=1	30	3	Rbx1	0.835	0.425423	High	High	High	High	High	High	High	High	High	High
High	Master Protein	Q9D8E6	60S ribosomal protein L4 OS=Mus musculus OX=10090 GN=Rpl4 PE=1 SV=3	257	22	Rpl4	0.893	0.425703	High	High	High	High	High	High	High	High	High	High
High	Master Protein	E9QAF9	Protein TANC1 OS=Mus musculus OX=10090 GN=Tanc1 PE=1 SV=1	5	3	Tanc1	0.722	0.426725	Peak Found	Peak Found	High	High	Peak Found	Peak Found	Peak Found	High	High	High
High	Master Protein	A0A5F8MPK0	K(+) channel subunit beta-1 OS=Mus musculus OX=10090 GN=Kcnab1 PE=1 SV=1	35	4	Kcnab1	0.802	0.426725	High	High	High	High	High	Peak Found	High	High	High	High
High	Master Protein	Q66L47	Guanine nucleotide binding protein, alpha stimulating, olfactory type OS=Mus musculus OX=10090 GN=Gnal PE=1 SV=1	137	7	Gnal	0.846	0.426725	High	High	High	High	High	High	High	High	High	High
High	Master Protein	Q60829	Protein phosphatase 1 regulatory subunit 1B OS=Mus musculus OX=10090 GN=Ppp1r1b PE=1 SV=2	66	6	Ppp1r1b	0.852	0.428688	High	High	High	High	High	High	High	High	High	High
High	Master Protein	Q922B2	Aspartate--tRNA ligase, cytoplasmic OS=Mus musculus OX=10090 GN=Dars1 PE=1 SV=2	179	27	Dars1	0.876	0.428688	High	High	High	High	High	High	High	High	High	High
High	Master Protein	Q0PHV7	Dapper homolog 3 OS=Mus musculus OX=10090 GN=Dact3 PE=1 SV=1	10	3	Dact3	1.305	0.429435	High	High	High	High	High	Peak Found	High	Peak Found	High	Peak Found
High	Master Protein	Q61743	ATP-sensitive inward rectifier potassium channel 11 OS=Mus musculus OX=10090 GN=Kcnj11 PE=1 SV=1	14	3	Kcnj11	1.311	0.430995	High	High	Peak Found	High	High	High	High	High	High	High
High	Master Protein	O89001	Carboxypeptidase D OS=Mus musculus OX=10090 GN=Cpd PE=1 SV=2	34	13	Cpd	0.822	0.434902	High	High	High	High	High	High	High	High	High	High
High	Master Protein	Q8R1B5	Complexin-3 OS=Mus musculus OX=10090 GN=Cplx3 PE=1 SV=1	52	8	Cplx3	0.852	0.435804	High	High	High	High	High	High	High	High	High	High
High	Master Protein	P56380	Bis(5'-nucleosyl)-tetraphosphatase [asymmetrical] OS=Mus musculus OX=10090 GN=Nudt2 PE=1 SV=3	20	6	Nudt2	0.806	0.435841	High	High	High	High	High	High	Peak Found	High	High	High
High	Master Protein	Q91VR5	ATP-dependent RNA helicase DDX1 OS=Mus musculus OX=10090 GN=Ddx1 PE=1 SV=1	171	22	Ddx1	0.873	0.436365	High	High	High	High	High	High	High	High	High	High
High	Master Protein	Q9D0F9	Phosphoglucomutase-1 OS=Mus musculus OX=10090 GN=Pgm1 PE=1 SV=4	290	28	Pgm1	0.9	0.436365	High	High	High	High	High	High	High	High	High	High
High	Master Protein	Q78JW9	Ubiquitin domain-containing protein UBFD1 OS=Mus musculus OX=10090 GN=Ubfd1 PE=1 SV=2	25	4	Ubfd1	0.846	0.437061	High	High	High	High	High	High	High	High	High	High
High	Master Protein	P09528	Ferritin heavy chain OS=Mus musculus OX=10090 GN=Fth1 PE=1 SV=2	94	9	Fth1	0.874	0.437061	High	High	High	High	High	High	High	High	High	High
High	Master Protein	Q8BG94	COMM domain-containing protein 7 OS=Mus musculus OX=10090 GN=Commd7 PE=1 SV=1	10	3	Commd7	1.1	0.438799	High	High	High	High	High	Peak Found	High	Peak Found	Peak Found	High
High	Master Protein	P26443	Glutamate dehydrogenase 1, mitochondrial OS=Mus musculus OX=10090 GN=Glud1 PE=1 SV=1	558	28	Glud1	1.109	0.441067	High	High	High	High	High	High	High	High	High	High
High	Master Protein	P06837	Neuromodulin OS=Mus musculus OX=10090 GN=Gap43 PE=1 SV=1	297	13	Gap43	0.9	0.44213	High	High	High	High	High	High	High	High	High	High
High	Master Protein	Q5NCE8	Magnesium transporter MRS2 homolog, mitochondrial OS=Mus musculus OX=10090 GN=Mrs2 PE=2 SV=2	16	5	Mrs2	1.213	0.442655	High	High	High	Peak Found	High	High	High	High	High	High
High	Master Protein	P16330	2',3'-cyclic-nucleotide 3'-phosphodiesterase OS=Mus musculus OX=10090 GN=Cnp PE=1 SV=3	737	36	Cnp	1.109	0.443431	High	High	High	High	High	High	High	High	High	High
High	Master Protein	O08663	Methionine aminopeptidase 2 OS=Mus musculus OX=10090 GN=Metap2 PE=1 SV=1	46	8	Metap2	1.13	0.444381	High	High	High	High	High	High	High	High	High	High
High	Master Protein	P35762	CD81 antigen OS=Mus musculus OX=10090 GN=Cd81 PE=1 SV=2	199	4	Cd81	0.901	0.44547	High	High	High	High	High	High	High	High	High	High
High	Master Protein	P47962	60S ribosomal protein L5 OS=Mus musculus OX=10090 GN=Rpl5 PE=1 SV=3	143	12	Rpl5	0.879	0.44547	High	High	High	High	High	High	High	High	High	High
High	Master Protein	Q61425	Hydroxyacyl-coenzyme A dehydrogenase, mitochondrial OS=Mus musculus OX=10090 GN=Hadh PE=1 SV=2	102	16	Hadh	1.102	0.44547	High	High	High	High	High	High	High	High	High	High
High	Master Protein	Q8R059	UDP-glucose 4-epimerase OS=Mus musculus OX=10090 GN=Gale PE=1 SV=1	9	3	Gale	0.759	0.445906	Peak Found	High	High	Peak Found	Peak Found	High	Peak Found	High	High	Peak Found
High	Master Protein	A0A1W2P879	Paralemmin-1 (Fragment) OS=Mus musculus OX=10090 GN=Palm PE=1 SV=1	147	2	Palm	0.855	0.446486	High	High	High	High	High	High	High	High	High	High
High	Master Protein	Q80VQ0	Aldehyde dehydrogenase family 3 member B1 OS=Mus musculus OX=10090 GN=Aldh3b1 PE=1 SV=1	18	5	Aldh3b1	1.232	0.447766	High	High	High	High	High	High	High	High	High	High
High	Master Protein	P21995	Embigin OS=Mus musculus OX=10090 GN=Emb PE=1 SV=2	41	5	Emb	1.129	0.447766	High	High	High	High	High	High	High	High	High	High
High	Master Protein	Q566J8	Atypical kinase COQ8B, mitochondrial OS=Mus musculus OX=10090 GN=Coq8b PE=1 SV=1	2	2	Coq8b	1.218	0.448507	Peak Found	Peak Found	High	Peak Found	Peak Found	Peak Found	High	Peak Found	Peak Found	Peak Found
High	Master Protein	Q8C2Q8	ATP synthase subunit gamma OS=Mus musculus OX=10090 GN=Atp5c1 PE=1 SV=1	213	13	Atp5c1	1.108	0.448669	High	High	High	High	High	High	High	High	High	High
High	Master Protein	O88705	Potassium/sodium hyperpolarization-activated cyclic nucleotide-gated channel 3 OS=Mus musculus OX=10090 GN=Hcn3 PE=1 SV=1	27	2	Hcn3	1.298	0.448931	High	High	High	High	Peak Found	High	High	High	High	High
High	Master Protein	Q9CZM2	60S ribosomal protein L15 OS=Mus musculus OX=10090 GN=Rpl15 PE=1 SV=4	43	5	Rpl15	0.862	0.451538	High	High	High	High	High	High	High	High	High	High
High	Master Protein	Q921M7	CYFIP-related Rac1 interactor B OS=Mus musculus OX=10090 GN=Cyrib PE=1 SV=1	206	10	Cyrib	0.901	0.453296	High	High	High	High	High	High	High	High	High	High
High	Master Protein	Q8QZS1	3-hydroxyisobutyryl-CoA hydrolase, mitochondrial OS=Mus musculus OX=10090 GN=Hibch PE=1 SV=1	125	15	Hibch	1.102	0.458216	High	High	High	High	High	High	High	High	High	High
High	Master Protein	O88507	Ciliary neurotrophic factor receptor subunit alpha OS=Mus musculus OX=10090 GN=Cntfr PE=1 SV=2	60	6	Cntfr	0.878	0.461131	High	High	High	High	High	High	High	High	High	High
High	Master Protein	O35449	Proline-rich transmembrane protein 1 OS=Mus musculus OX=10090 GN=Prrt1 PE=1 SV=1	9	3	Prrt1	1.129	0.462228	High	High	High	Peak Found	High	Peak Found	Peak Found	Peak Found	Peak Found	High
High	Master Protein	Q60673	Receptor-type tyrosine-protein phosphatase-like N OS=Mus musculus OX=10090 GN=Ptprn PE=1 SV=2	36	6	Ptprn	0.84	0.462228	High	High	High	High	Peak Found	High	High	High	High	High
High	Master Protein	Q9D924	Iron-sulfur cluster assembly 1 homolog, mitochondrial OS=Mus musculus OX=10090 GN=Isca1 PE=2 SV=1	40	6	Isca1	1.129	0.462228	High	High	High	High	High	High	High	High	High	High
High	Master Protein	Q8VBT9	Tether containing UBX domain for GLUT4 OS=Mus musculus OX=10090 GN=Aspscr1 PE=1 SV=1	38	8	Aspscr1	1.098	0.462228	High	High	High	High	High	High	High	High	High	High
High	Master Protein	Q8K1R3	Polyribonucleotide nucleotidyltransferase 1, mitochondrial OS=Mus musculus OX=10090 GN=Pnpt1 PE=1 SV=1	29	8	Pnpt1	1.185	0.462228	High	High	High	High	High	High	High	Peak Found	High	High
High	Master Protein	Q8C5H8	NAD kinase 2, mitochondrial OS=Mus musculus OX=10090 GN=Nadk2 PE=1 SV=2	45	9	Nadk2	1.148	0.462228	High	High	High	High	High	High	High	High	High	High
High	Master Protein	Q3U2A8	Valine--tRNA ligase, mitochondrial OS=Mus musculus OX=10090 GN=Vars2 PE=1 SV=2	18	7	Vars2	1.107	0.462819	High	High	Peak Found	High	Peak Found	High	High	High	High	Peak Found
High	Master Protein	P56382	ATP synthase subunit epsilon, mitochondrial OS=Mus musculus OX=10090 GN=Atp5f1e PE=1 SV=2	19	2	Atp5f1e	1.117	0.463157	High	High	High	High	High	High	High	High	High	High
High	Master Protein	Q8BXA5	Cleft lip and palate transmembrane protein 1-like protein OS=Mus musculus OX=10090 GN=Clptm1l PE=1 SV=1	5	2	Clptm1l	0.767	0.463582	Peak Found	High	Peak Found	Peak Found	High	High	Peak Found	High	High	Peak Found
High	Master Protein	A0A0R4J0G4	Ran-binding protein 10 OS=Mus musculus OX=10090 GN=Ranbp10 PE=1 SV=1	9	2	Ranbp10	1.346	0.46411	Peak Found	High	High	Peak Found	High	Peak Found	High	High	High	High
High	Master Protein	Q8R1N4	NudC domain-containing protein 3 OS=Mus musculus OX=10090 GN=Nudcd3 PE=1 SV=3	38	7	Nudcd3	0.848	0.468467	High	High	High	High	High	High	High	High	High	High
High	Master Protein	Q9EPU5	Tumor necrosis factor receptor superfamily member 21 OS=Mus musculus OX=10090 GN=Tnfrsf21 PE=1 SV=2	8	4	Tnfrsf21	0.85	0.469078	Peak Found	High	High	High	High	High	High	Peak Found	Peak Found	High
High	Master Protein	P51881	ADP/ATP translocase 2 OS=Mus musculus OX=10090 GN=Slc25a5 PE=1 SV=3	790	11	Slc25a5	1.106	0.469352	High	High	High	High	High	High	High	High	High	High
High	Master Protein	F6YMV1	Angiomotin (Fragment) OS=Mus musculus OX=10090 GN=Amot PE=1 SV=1	3	2	Amot	1.451	0.469643	Peak Found	Not Found	High	Peak Found	High	Peak Found	High	Peak Found	Peak Found	Peak Found
High	Master Protein	Q8R3Q6	Coiled-coil domain-containing protein 58 OS=Mus musculus OX=10090 GN=Ccdc58 PE=1 SV=1	29	5	Mix23	1.147	0.469643	High	High	High	High	High	High	High	High	High	High
High	Master Protein	E9QMV2	Costars family protein ABRACL OS=Mus musculus OX=10090 GN=Abracl PE=1 SV=1	10	3	Abracl	0.779	0.472024	Peak Found	Peak Found	Peak Found	Peak Found	Peak Found	High	Peak Found	High	High	Peak Found
High	Master Protein	Q3UUI3	Acyl-coenzyme A thioesterase THEM4 OS=Mus musculus OX=10090 GN=Them4 PE=1 SV=1	44	4	Them4	1.122	0.472622	High	High	High	High	High	High	High	High	High	High
High	Master Protein	P68404	Protein kinase C beta type OS=Mus musculus OX=10090 GN=Prkcb PE=1 SV=4	348	18	Prkcb	0.903	0.473365	High	High	High	High	High	High	High	High	High	High
High	Master Protein	D6RDD4	GDNF family receptor alpha-1 OS=Mus musculus OX=10090 GN=Gfra1 PE=1 SV=1	9	3	Gfra1	0.768	0.473667	High	High	Peak Found	High	High	Peak Found	High	High	Peak Found	High
High	Master Protein	D3YVM8	Biogenesis of lysosome-related organelles complex 1 subunit 1 OS=Mus musculus OX=10090 GN=Bloc1s1 PE=1 SV=1	3	2	Bloc1s1	0.744	0.475864	Peak Found	Peak Found	Peak Found	Peak Found	High	Not Found	High	High	Peak Found	Peak Found
High	Master Protein	P05202	Aspartate aminotransferase, mitochondrial OS=Mus musculus OX=10090 GN=Got2 PE=1 SV=1	1071	29	Got2	1.105	0.480369	High	High	High	High	High	High	High	High	High	High
High	Master Protein	Q8CHX7	Raftlin-2 OS=Mus musculus OX=10090 GN=Rftn2 PE=1 SV=3	41	7	Rftn2	0.848	0.480534	High	High	High	High	High	High	High	High	High	High
High	Master Protein	Q5F4T0	Transient receptor potential cation channel, subfamily M, member 3 OS=Mus musculus OX=10090 GN=Trpm3 PE=1 SV=1	3	2	Trpm3	0.667	0.48093	Peak Found	Not Found	Peak Found	Not Found	High	High	High	Peak Found	Not Found	Peak Found
High	Master Protein	P56873	Protein ZNRD2 OS=Mus musculus OX=10090 GN=Znrd2 PE=1 SV=1	10	3	Znrd2	0.756	0.48093	Peak Found	High	High	High	Peak Found	Peak Found	High	High	High	High
High	Master Protein	O55100	Synaptogyrin-1 OS=Mus musculus OX=10090 GN=Syngr1 PE=1 SV=2	43	3	Syngr1	0.892	0.48093	High	High	High	High	High	High	High	High	High	High
High	Master Protein	O35393	Ephrin-B3 OS=Mus musculus OX=10090 GN=Efnb3 PE=1 SV=1	12	4	Efnb3	1.253	0.48093	High	High	High	High	High	High	High	High	High	Peak Found
High	Master Protein	Q9D1C8	Vacuolar protein sorting-associated protein 28 homolog OS=Mus musculus OX=10090 GN=Vps28 PE=1 SV=1	51	8	Vps28	0.852	0.48093	High	High	High	High	High	High	High	High	High	High
High	Master Protein	P28474	Alcohol dehydrogenase class-3 OS=Mus musculus OX=10090 GN=Adh5 PE=1 SV=3	97	10	Adh5	0.88	0.48093	High	High	High	High	High	High	High	High	High	High
High	Master Protein	Q5Y5T5	Palmitoyltransferase ZDHHC8 OS=Mus musculus OX=10090 GN=Zdhhc8 PE=1 SV=1	3	2	Zdhhc8	0.766	0.482761	Peak Found	Peak Found	Peak Found	Peak Found	Peak Found	Peak Found	Peak Found	High	Peak Found	High
High	Master Protein	Q3UR70	Transforming growth factor-beta receptor-associated protein 1 OS=Mus musculus OX=10090 GN=Tgfbrap1 PE=1 SV=1	9	5	Tgfbrap1	0.817	0.483409	High	High	High	High	High	High	High	Peak Found	Peak Found	Peak Found
High	Master Protein	Q8K0Z7	Translational activator of cytochrome c oxidase 1 OS=Mus musculus OX=10090 GN=Taco1 PE=1 SV=1	54	9	Taco1	1.128	0.484206	High	High	High	High	High	High	High	High	High	High
High	Master Protein	Q91YP0	L-2-hydroxyglutarate dehydrogenase, mitochondrial OS=Mus musculus OX=10090 GN=L2hgdh PE=1 SV=1	64	16	L2hgdh	1.121	0.484206	High	High	High	High	High	High	High	High	High	High
High	Master Protein	P55194	SH3 domain-binding protein 1 OS=Mus musculus OX=10090 GN=Sh3bp1 PE=1 SV=3	13	5	Sh3bp1	0.78	0.485635	High	High	Peak Found	Peak Found	Peak Found	High	High	High	High	High
High	Master Protein	Q9DCJ5	NADH dehydrogenase [ubiquinone] 1 alpha subcomplex subunit 8 OS=Mus musculus OX=10090 GN=Ndufa8 PE=1 SV=3	133	9	Ndufa8	1.104	0.487498	High	High	High	High	High	High	High	High	High	High
High	Master Protein	Q9D3D9	ATP synthase subunit delta, mitochondrial OS=Mus musculus OX=10090 GN=Atp5f1d PE=1 SV=1	96	6	Atp5f1d	1.104	0.487674	High	High	High	High	High	High	High	High	High	High
High	Master Protein	Q78IK4	MICOS complex subunit Mic27 OS=Mus musculus OX=10090 GN=Apool PE=1 SV=1	42	9	Apool	1.129	0.487674	High	High	High	High	High	High	High	High	High	High
High	Master Protein	Q80TI0	Protein Aster-B OS=Mus musculus OX=10090 GN=Gramd1b PE=1 SV=2	37	10	Gramd1b	0.852	0.487674	High	High	High	High	High	High	High	High	High	High
High	Master Protein	B1AU25	Apoptosis-inducing factor 1, mitochondrial OS=Mus musculus OX=10090 GN=Aifm1 PE=1 SV=1	140	17	Aifm1	1.1	0.487674	High	High	High	High	High	High	High	High	High	High
High	Master Protein	Q3UHD1	Adhesion G protein-coupled receptor B1 OS=Mus musculus OX=10090 GN=Adgrb1 PE=1 SV=1	69	19	Adgrb1	1.124	0.489051	High	High	High	High	High	High	High	High	High	High
High	Master Protein	Q8VHK5	Membrane protein MLC1 OS=Mus musculus OX=10090 GN=Mlc1 PE=1 SV=1	28	6	Mlc1	0.853	0.490266	High	High	High	High	High	High	High	High	High	High
High	Master Protein	D3YZN4	Paraplegin OS=Mus musculus OX=10090 GN=Spg7 PE=1 SV=1	50	12	Spg7	1.12	0.491162	High	High	High	High	High	High	High	High	High	High
High	Master Protein	A0A286YDC5	Mitochondrial intermediate peptidase OS=Mus musculus OX=10090 GN=Mipep PE=1 SV=1	7	5	Mipep	1.232	0.49192	Peak Found	High	High	Peak Found	Peak Found	High	High	High	High	Peak Found
High	Master Protein	Q9DBS2	Tumor protein p63-regulated gene 1-like protein OS=Mus musculus OX=10090 GN=Tprg1l PE=1 SV=1	81	10	Tprg1l	0.879	0.49192	High	High	High	High	High	High	High	High	High	High
High	Master Protein	Q9D6J5	NADH dehydrogenase [ubiquinone] 1 beta subcomplex subunit 8, mitochondrial OS=Mus musculus OX=10090 GN=Ndufb8 PE=1 SV=1	70	8	Ndufb8	0.883	0.492394	High	High	High	High	High	High	High	High	High	High
High	Master Protein	Q61599	Rho GDP-dissociation inhibitor 2 OS=Mus musculus OX=10090 GN=Arhgdib PE=1 SV=3	22	4	Arhgdib	0.798	0.493603	High	High	High	High	High	High	High	High	High	High
High	Master Protein	P25444	40S ribosomal protein S2 OS=Mus musculus OX=10090 GN=Rps2 PE=1 SV=3	96	11	Rps2	0.892	0.493605	High	High	High	High	High	High	High	High	High	High
High	Master Protein	Q9WTX2	Interferon-inducible double-stranded RNA-dependent protein kinase activator A OS=Mus musculus OX=10090 GN=Prkra PE=1 SV=1	9	4	Prkra	0.797	0.496921	Peak Found	High	Peak Found	Peak Found	Peak Found	High	High	High	High	High
High	Master Protein	P16045	Galectin-1 OS=Mus musculus OX=10090 GN=Lgals1 PE=1 SV=3	55	5	Lgals1	1.115	0.497237	High	High	High	High	High	High	High	High	High	High
High	Master Protein	Q8BGN8	Synaptoporin OS=Mus musculus OX=10090 GN=Synpr PE=1 SV=1	46	4	Synpr	1.098	0.498369	High	High	High	High	High	High	High	High	High	High
High	Master Protein	Q9DC63	F-box only protein 3 OS=Mus musculus OX=10090 GN=Fbxo3 PE=1 SV=1	16	4	Fbxo3	0.783	0.498369	High	High	High	Peak Found	High	High	High	High	High	High
High	Master Protein	Q9Z1N5	Spliceosome RNA helicase Ddx39b OS=Mus musculus OX=10090 GN=Ddx39b PE=1 SV=1	37	10	Ddx39b	0.849	0.498369	High	High	High	High	High	High	High	High	High	High
High	Master Protein	P45952	Medium-chain specific acyl-CoA dehydrogenase, mitochondrial OS=Mus musculus OX=10090 GN=Acadm PE=1 SV=1	106	14	Acadm	1.096	0.498369	High	High	High	High	High	High	High	High	High	High
High	Master Protein	Q9D173	Mitochondrial import receptor subunit TOM7 homolog OS=Mus musculus OX=10090 GN=Tomm7 PE=3 SV=1	2	2	Tomm7	0.672	0.498416	Peak Found	Peak Found	Not Found	Not Found	Peak Found	Not Found	High	Peak Found	Peak Found	Peak Found
High	Master Protein	Q62426	Cystatin-B OS=Mus musculus OX=10090 GN=Cstb PE=1 SV=1	36	4	Cstb	0.867	0.498416	High	High	High	High	High	High	High	High	High	High
High	Master Protein	P30275	Creatine kinase U-type, mitochondrial OS=Mus musculus OX=10090 GN=Ckmt1 PE=1 SV=1	1063	27	Ckmt1	1.103	0.498416	High	High	High	High	High	High	High	High	High	High
High	Master Protein	Q9CQR2	40S ribosomal protein S21 OS=Mus musculus OX=10090 GN=Rps21 PE=1 SV=1	29	4	Rps21	0.851	0.49989	High	High	High	High	High	High	High	High	High	High
High	Master Protein	P97371	Proteasome activator complex subunit 1 OS=Mus musculus OX=10090 GN=Psme1 PE=1 SV=2	102	12	Psme1	1.098	0.49989	High	High	High	High	High	High	High	High	High	High
High	Master Protein	P50544	Very long-chain specific acyl-CoA dehydrogenase, mitochondrial OS=Mus musculus OX=10090 GN=Acadvl PE=1 SV=3	146	30	Acadvl	1.101	0.49989	High	High	High	High	High	High	High	High	High	High
High	Master Protein	Q9QUR8	Semaphorin-7A OS=Mus musculus OX=10090 GN=Sema7a PE=1 SV=1	28	9	Sema7a	1.123	0.500661	High	High	High	High	High	High	High	High	High	High
High	Master Protein	Q9QUI0	Transforming protein RhoA OS=Mus musculus OX=10090 GN=Rhoa PE=1 SV=1	357	6	Rhoa	1.103	0.500935	High	High	High	High	High	High	High	High	High	High
High	Master Protein	Q9JMC8	Band 4.1-like protein 4B OS=Mus musculus OX=10090 GN=Epb41l4b PE=1 SV=2	6	2	Epb41l4b	1.329	0.50152	High	Peak Found	High	Peak Found	High	High	Peak Found	Peak Found	Peak Found	High
High	Master Protein	O35375	Neuropilin-2 OS=Mus musculus OX=10090 GN=Nrp2 PE=1 SV=2	11	5	Nrp2	0.794	0.501655	Peak Found	Peak Found	High	High	Peak Found	High	High	High	High	Peak Found
High	Master Protein	Q9DC51	Guanine nucleotide-binding protein G(i) subunit alpha OS=Mus musculus OX=10090 GN=Gnai3 PE=1 SV=3	203	7	Gnai3	0.855	0.501655	High	High	High	High	High	High	High	High	High	High
High	Master Protein	Q7TN29	Stromal membrane-associated protein 2 OS=Mus musculus OX=10090 GN=Smap2 PE=1 SV=1	85	9	Smap2	0.867	0.501655	High	High	High	High	High	High	High	High	High	High
High	Master Protein	Q8K274	Ketosamine-3-kinase OS=Mus musculus OX=10090 GN=Fn3krp PE=1 SV=2	53	7	Fn3krp	0.849	0.506943	High	High	High	High	High	High	High	High	High	High
High	Master Protein	Q8BNW9	Kelch repeat and BTB domain-containing protein 11 OS=Mus musculus OX=10090 GN=Kbtbd11 PE=1 SV=3	105	20	Kbtbd11	0.878	0.507413	High	High	High	High	High	High	High	High	High	High
High	Master Protein	A0A0J9YUM2	Ras/Rap GTPase-activating protein SynGAP OS=Mus musculus OX=10090 GN=Syngap1 PE=1 SV=4	822	3	Syngap1	0.817	0.509993	High	High	High	High	High	High	High	High	High	High
High	Master Protein	P03888	NADH-ubiquinone oxidoreductase chain 1 OS=Mus musculus OX=10090 GN=Mtnd1 PE=1 SV=3	30	4	Mtnd1	0.863	0.512832	High	High	High	High	High	High	High	High	High	High
High	Master Protein	Q99MN9	Propionyl-CoA carboxylase beta chain, mitochondrial OS=Mus musculus OX=10090 GN=Pccb PE=1 SV=2	133	19	Pccb	1.095	0.513	High	High	High	High	High	High	High	High	High	High
High	Master Protein	P59017	Bcl-2-like protein 13 OS=Mus musculus OX=10090 GN=Bcl2l13 PE=1 SV=2	96	12	Bcl2l13	0.882	0.513452	High	High	High	High	High	High	High	High	High	High
High	Master Protein	Q8BH58	TIP41-like protein OS=Mus musculus OX=10090 GN=Tiprl PE=1 SV=1	58	11	Tiprl	0.861	0.516184	High	High	High	High	High	High	High	High	High	High
High	Master Protein	A0A0A6YWE6	Astrotactin-1 OS=Mus musculus OX=10090 GN=Astn1 PE=1 SV=1	273	2	Astn1	0.753	0.517155	High	High	Not Found	High	Peak Found	High	High	High	High	High
High	Master Protein	Q99M07	Cytochrome c oxidase assembly factor 5 OS=Mus musculus OX=10090 GN=Coa5 PE=1 SV=1	10	3	Coa5	1.205	0.518615	High	High	High	Peak Found	High	High	High	High	High	High
High	Master Protein	P20352	Tissue factor OS=Mus musculus OX=10090 GN=F3 PE=1 SV=2	34	8	F3	0.855	0.520755	High	High	High	High	High	High	High	High	High	High
High	Master Protein	Q505N6	Ribosomal protein S6 kinase OS=Mus musculus OX=10090 GN=Rps6ka1 PE=1 SV=1	12	2	Rps6ka1	0.787	0.521895	Peak Found	Peak Found	Peak Found	Peak Found	Peak Found	High	High	High	Peak Found	Peak Found
High	Master Protein	P32211	Muscarinic acetylcholine receptor M4 OS=Mus musculus OX=10090 GN=Chrm4 PE=2 SV=1	19	2	Chrm4	0.808	0.521895	High	High	High	High	High	High	High	High	High	High
High	Master Protein	Q9CQA6	Coiled-coil-helix-coiled-coil-helix domain-containing protein 1 OS=Mus musculus OX=10090 GN=Chchd1 PE=1 SV=1	3	2	Chchd1	1.263	0.521895	Peak Found	Not Found	High	Not Found	Not Found	Peak Found	Peak Found	High	High	Peak Found
High	Master Protein	P03930	ATP synthase protein 8 OS=Mus musculus OX=10090 GN=Mtatp8 PE=1 SV=1	30	2	Mtatp8	1.094	0.521895	High	High	High	High	High	High	High	High	High	High
High	Master Protein	E9PW43	Predicted pseudogene 10320 OS=Mus musculus OX=10090 GN=Gm10320 PE=3 SV=1	14	2	Gm10320	0.831	0.521895	High	High	High	High	High	High	High	High	High	High
High	Master Protein	Q923L3	CUB and sushi domain-containing protein 1 OS=Mus musculus OX=10090 GN=Csmd1 PE=1 SV=2	11	4	Csmd1	1.141	0.521895	High	High	High	High	High	Peak Found	Peak Found	High	High	High
High	Master Protein	A0A0R4J030	APC membrane recruitment protein 2 OS=Mus musculus OX=10090 GN=Amer2 PE=1 SV=1	35	10	Amer2	1.115	0.521895	High	High	High	High	High	High	High	High	High	High
High	Master Protein	P29416	Beta-hexosaminidase subunit alpha OS=Mus musculus OX=10090 GN=Hexa PE=1 SV=2	48	10	Hexa	1.122	0.521895	High	High	High	High	High	High	High	High	High	High
High	Master Protein	P99029	Peroxiredoxin-5, mitochondrial OS=Mus musculus OX=10090 GN=Prdx5 PE=1 SV=2	350	15	Prdx5	1.1	0.521895	High	High	High	High	High	High	High	High	High	High
High	Master Protein	Q61233	Plastin-2 OS=Mus musculus OX=10090 GN=Lcp1 PE=1 SV=4	125	22	Lcp1	0.865	0.521895	High	High	High	High	High	High	High	High	High	High
High	Master Protein	Q3V3R1	Monofunctional C1-tetrahydrofolate synthase, mitochondrial OS=Mus musculus OX=10090 GN=Mthfd1l PE=1 SV=2	244	39	Mthfd1l	1.09	0.521895	High	High	High	High	High	High	High	High	High	High
High	Master Protein	A0A087WNV6	5'-3' exoribonuclease 1 OS=Mus musculus OX=10090 GN=Xrn1 PE=1 SV=1	2	2	Xrn1	1.475	0.522462	High	Not Found	High	Not Found	Not Found	Peak Found	Peak Found	Peak Found	Peak Found	Peak Found
High	Master Protein	P42125	Enoyl-CoA delta isomerase 1, mitochondrial OS=Mus musculus OX=10090 GN=Eci1 PE=1 SV=2	70	11	Eci1	1.092	0.522979	High	High	High	High	High	High	High	High	High	High
High	Master Protein	A0A498WGD8	Thioredoxin-like protein 1 OS=Mus musculus OX=10090 GN=Txnl1 PE=1 SV=1	124	16	Txnl1	0.89	0.523187	High	High	High	High	High	High	High	High	High	High
High	Master Protein	Q8BU31	Ras-related protein Rap-2c OS=Mus musculus OX=10090 GN=Rap2c PE=1 SV=1	120	5	Rap2c	0.843	0.52454	High	High	High	High	High	High	High	High	High	High
High	Master Protein	Q71RI9	Kynurenine--oxoglutarate transaminase 3 OS=Mus musculus OX=10090 GN=Kyat3 PE=1 SV=1	27	5	Kyat3	1.167	0.52454	High	High	High	High	High	High	High	High	High	High
High	Master Protein	E9PXX7	Thioredoxin domain-containing protein 5 OS=Mus musculus OX=10090 GN=Txndc5 PE=1 SV=1	69	11	Txndc5	1.122	0.52454	High	High	High	High	High	High	High	High	High	High
High	Master Protein	E0CYV0	Protein-L-isoaspartate O-methyltransferase OS=Mus musculus OX=10090 GN=Pcmt1 PE=1 SV=1	204	14	Pcmt1	0.908	0.52454	High	High	High	High	High	High	High	High	High	High
High	Master Protein	Q8R050	Eukaryotic peptide chain release factor GTP-binding subunit ERF3A OS=Mus musculus OX=10090 GN=Gspt1 PE=1 SV=2	96	8	Gspt1	0.862	0.525697	High	High	High	High	High	High	High	High	High	High
High	Master Protein	Q9DBJ1	Phosphoglycerate mutase 1 OS=Mus musculus OX=10090 GN=Pgam1 PE=1 SV=3	562	15	Pgam1	0.909	0.526387	High	High	High	High	High	High	High	High	High	High
High	Master Protein	P32883	GTPase KRas OS=Mus musculus OX=10090 GN=Kras PE=1 SV=1	189	4	Kras	0.86	0.527254	High	High	High	High	High	High	High	High	High	High
High	Master Protein	A2ATP6	Myelin expression factor 2 OS=Mus musculus OX=10090 GN=Myef2 PE=1 SV=2	4	2	Myef2	0.752	0.527339	Peak Found	High	Peak Found	Peak Found	High	Peak Found	High	High	Peak Found	Peak Found
High	Master Protein	Q8BHW2	Protein OSCP1 OS=Mus musculus OX=10090 GN=Oscp1 PE=1 SV=1	47	7	Oscp1	0.858	0.527339	High	High	High	High	High	High	High	High	High	High
High	Master Protein	P62334	26S proteasome regulatory subunit 10B OS=Mus musculus OX=10090 GN=Psmc6 PE=1 SV=1	146	18	Psmc6	0.888	0.528936	High	High	High	High	High	High	High	High	High	High
High	Master Protein	D3Z5B1	Zinc finger, BED type-containing 5 (Fragment) OS=Mus musculus OX=10090 GN=Zbed5 PE=4 SV=8	35	3	Zbed5	1.137	0.529841	High	High	High	High	High	High	High	High	High	High
High	Master Protein	Q9JI39	ATP-binding cassette sub-family B member 10, mitochondrial OS=Mus musculus OX=10090 GN=Abcb10 PE=1 SV=1	9	4	Abcb10	1.254	0.530864	High	Peak Found	Peak Found	High	High	High	High	High	High	High
High	Master Protein	Q8BHL8	Proteasome inhibitor PI31 subunit OS=Mus musculus OX=10090 GN=Psmf1 PE=1 SV=1	11	3	Psmf1	0.777	0.532073	High	High	High	High	Peak Found	High	High	Peak Found	High	High
High	Master Protein	Q91YL2	E3 ubiquitin-protein ligase RNF126 OS=Mus musculus OX=10090 GN=Rnf126 PE=1 SV=1	11	4	Rnf126	1.14	0.532606	Peak Found	High	High	Peak Found	High	High	High	High	High	Peak Found
High	Master Protein	Q8BGT6	MICAL-like protein 1 OS=Mus musculus OX=10090 GN=Micall1 PE=1 SV=3	2	2	Micall1	0.685	0.533842	Not Found	Not Found	Not Found	Not Found	Peak Found	High	Peak Found	High	Not Found	Not Found
High	Master Protein	Q99L45	Eukaryotic translation initiation factor 2 subunit 2 OS=Mus musculus OX=10090 GN=Eif2s2 PE=1 SV=1	31	7	Eif2s2	0.854	0.534345	High	High	High	High	High	High	High	High	High	High
High	Master Protein	Q61337	Bcl2-associated agonist of cell death OS=Mus musculus OX=10090 GN=Bad PE=1 SV=1	10	2	Bad	0.788	0.534512	High	Peak Found	Peak Found	Peak Found	High	High	High	High	High	Peak Found
High	Master Protein	Q9WV32	Actin-related protein 2/3 complex subunit 1B OS=Mus musculus OX=10090 GN=Arpc1b PE=1 SV=4	24	4	Arpc1b	0.828	0.536246	High	Peak Found	High	Peak Found	Peak Found	High	High	Peak Found	High	High
High	Master Protein	Q0VB45	G protein-activated inward rectifier potassium channel 2 OS=Mus musculus OX=10090 GN=Kcnj6 PE=1 SV=1	10	2	Kcnj6	0.782	0.537634	High	Peak Found	Peak Found	High	High	High	High	High	Peak Found	High
High	Master Protein	Q8CJH3	Plexin-B1 OS=Mus musculus OX=10090 GN=Plxnb1 PE=1 SV=2	118	26	Plxnb1	0.883	0.53838	High	High	High	High	High	High	High	High	High	High
High	Master Protein	P52503	NADH dehydrogenase [ubiquinone] iron-sulfur protein 6, mitochondrial OS=Mus musculus OX=10090 GN=Ndufs6 PE=1 SV=2	110	4	Ndufs6	1.098	0.539044	High	High	High	High	High	High	High	High	High	High
High	Master Protein	Q922H2	[Pyruvate dehydrogenase (acetyl-transferring)] kinase isozyme 3, mitochondrial OS=Mus musculus OX=10090 GN=Pdk3 PE=1 SV=1	115	17	Pdk3	1.092	0.539044	High	High	High	High	High	High	High	High	High	High
High	Master Protein	Q9CQH7	Transcription factor BTF3 homolog 4 OS=Mus musculus OX=10090 GN=Btf3l4 PE=1 SV=1	30	4	Btf3l4	0.865	0.539606	High	High	High	High	High	High	High	High	High	High
High	Master Protein	P10630	Eukaryotic initiation factor 4A-II OS=Mus musculus OX=10090 GN=Eif4a2 PE=1 SV=2	159	11	Eif4a2	0.888	0.547126	High	High	High	High	High	High	High	High	High	High
High	Master Protein	A0A5F8MP96	Septin-4 OS=Mus musculus OX=10090 GN=Septin4 PE=1 SV=1	241	16	Septin4	1.09	0.547641	High	High	High	High	High	High	High	High	High	High
High	Master Protein	A2ANL9	Teneurin-1 OS=Mus musculus OX=10090 GN=Tenm1 PE=1 SV=1	8	5	Tenm1	0.821	0.54837	Peak Found	Peak Found	Peak Found	Peak Found	High	High	Peak Found	High	High	High
High	Master Protein	P46660	Alpha-internexin OS=Mus musculus OX=10090 GN=Ina PE=1 SV=3	386	35	Ina	1.097	0.549086	High	High	High	High	High	High	High	High	High	High
High	Master Protein	Q9JMA1	Ubiquitin carboxyl-terminal hydrolase 14 OS=Mus musculus OX=10090 GN=Usp14 PE=1 SV=3	148	22	Usp14	0.891	0.549341	High	High	High	High	High	High	High	High	High	High
High	Master Protein	Q5F2E8	Serine/threonine-protein kinase TAO1 OS=Mus musculus OX=10090 GN=Taok1 PE=1 SV=1	62	11	Taok1	1.115	0.54992	High	High	High	High	High	High	High	High	High	High
High	Master Protein	Q8CA71	Protein shisa-4 OS=Mus musculus OX=10090 GN=Shisa4 PE=1 SV=1	22	2	Shisa4	1.115	0.550394	High	High	High	High	High	High	High	High	High	High
High	Master Protein	Q9D071	MMS19 nucleotide excision repair protein homolog OS=Mus musculus OX=10090 GN=Mms19 PE=1 SV=1	31	6	Mms19	0.792	0.550545	High	High	High	High	High	High	High	High	High	High
High	Master Protein	Q9WV54	Acid ceramidase OS=Mus musculus OX=10090 GN=Asah1 PE=1 SV=1	105	13	Asah1	1.088	0.550639	High	High	High	High	High	High	High	High	High	High
High	Master Protein	A0A1D5RLW5	60S ribosomal protein L18a OS=Mus musculus OX=10090 GN=Rpl18a PE=1 SV=1	37	5	Rpl18a	0.857	0.551887	High	High	High	High	High	High	High	High	High	High
High	Master Protein	P97772	Metabotropic glutamate receptor 1 OS=Mus musculus OX=10090 GN=Grm1 PE=1 SV=2	44	10	Grm1	1.141	0.551887	High	High	High	High	High	High	High	High	High	High
High	Master Protein	Q8CEE7	Retinol dehydrogenase 13 OS=Mus musculus OX=10090 GN=Rdh13 PE=1 SV=1	6	2	Rdh13	1.255	0.552489	Peak Found	Peak Found	Peak Found	Peak Found	High	High	High	High	High	High
High	Master Protein	Q6PI17	Metalloproteinase inhibitor 2 OS=Mus musculus OX=10090 GN=Timp2 PE=1 SV=1	2	2	Timp2	1.35	0.552489	Peak Found	Peak Found	Peak Found	Peak Found	Peak Found	High	Peak Found	Peak Found	Peak Found	High
High	Master Protein	Q9DB77	Cytochrome b-c1 complex subunit 2, mitochondrial OS=Mus musculus OX=10090 GN=Uqcrc2 PE=1 SV=1	467	18	Uqcrc2	1.097	0.552489	High	High	High	High	High	High	High	High	High	High
High	Master Protein	Q61361	Brevican core protein OS=Mus musculus OX=10090 GN=Bcan PE=1 SV=2	390	33	Bcan	0.911	0.553739	High	High	High	High	High	High	High	High	High	High
High	Master Protein	P70236	Dual specificity mitogen-activated protein kinase kinase 6 OS=Mus musculus OX=10090 GN=Map2k6 PE=1 SV=1	22	7	Map2k6	0.851	0.556992	High	High	High	High	High	High	High	High	High	High
High	Master Protein	Q91WS0	CDGSH iron-sulfur domain-containing protein 1 OS=Mus musculus OX=10090 GN=Cisd1 PE=1 SV=1	168	5	Cisd1	1.096	0.55712	High	High	High	High	High	High	High	High	High	High
High	Master Protein	Q62446	Peptidyl-prolyl cis-trans isomerase FKBP3 OS=Mus musculus OX=10090 GN=Fkbp3 PE=1 SV=2	81	9	Fkbp3	0.886	0.557663	High	High	High	High	High	High	High	High	High	High
High	Master Protein	Q9QYI5	DnaJ homolog subfamily B member 2 OS=Mus musculus OX=10090 GN=Dnajb2 PE=1 SV=3	42	5	Dnajb2	1.104	0.559906	High	High	High	High	High	High	High	High	High	High
High	Master Protein	Q9DCS2	Methyltransferase-like 26 OS=Mus musculus OX=10090 GN=Mettl26 PE=1 SV=1	7	3	Mettl26	0.821	0.560292	High	High	Peak Found	Peak Found	Peak Found	High	High	High	High	Peak Found
High	Master Protein	A0A0R4J1N9	Transcription factor A, mitochondrial OS=Mus musculus OX=10090 GN=Tfam PE=1 SV=1	72	9	Tfam	1.094	0.560565	High	High	High	High	High	High	High	High	High	High
High	Master Protein	P63141	Potassium voltage-gated channel subfamily A member 2 OS=Mus musculus OX=10090 GN=Kcna2 PE=1 SV=1	103	6	Kcna2	1.121	0.561336	High	High	High	High	High	High	High	High	High	High
High	Master Protein	Q9D154	Leukocyte elastase inhibitor A OS=Mus musculus OX=10090 GN=Serpinb1a PE=1 SV=1	33	8	Serpinb1a	1.116	0.562439	High	High	High	High	High	High	High	High	High	High
High	Master Protein	Q8C3V4	Signal transducer and activator of transcription OS=Mus musculus OX=10090 GN=Stat1 PE=1 SV=1	7	5	Stat1	1.38	0.56257	High	High	Peak Found	High	High	Peak Found	Peak Found	Peak Found	Peak Found	High
High	Master Protein	Q80U72	Protein scribble homolog OS=Mus musculus OX=10090 GN=Scrib PE=1 SV=2	9	5	Scrib	1.12	0.56257	High	High	High	High	High	Peak Found	High	High	Peak Found	Peak Found
High	Master Protein	A0A0G2JDI9	ATP-binding cassette sub-family D member 3 OS=Mus musculus OX=10090 GN=Abcd3 PE=1 SV=1	42	8	Abcd3	0.861	0.565416	High	High	High	High	High	High	High	High	High	High
High	Master Protein	Q924M7	Mannose-6-phosphate isomerase OS=Mus musculus OX=10090 GN=Mpi PE=1 SV=1	121	15	Mpi	0.889	0.565416	High	High	High	High	High	High	High	High	High	High
High	Master Protein	O09005	Sphingolipid delta(4)-desaturase DES1 OS=Mus musculus OX=10090 GN=Degs1 PE=1 SV=1	3	2	Degs1	1.318	0.567234	Peak Found	High	Peak Found	High	Peak Found	Peak Found	Peak Found	Peak Found	Peak Found	Peak Found
High	Master Protein	O88351	Inhibitor of nuclear factor kappa-B kinase subunit beta OS=Mus musculus OX=10090 GN=Ikbkb PE=1 SV=1	7	2	Ikbkb	1.428	0.567464	High	High	Not Found	High	Peak Found	Peak Found	High	High	Peak Found	High
High	Master Protein	D3Z1M4	Calcium-binding protein 1 OS=Mus musculus OX=10090 GN=Cabp1 PE=1 SV=1	2	2	Cabp1	1.422	0.567464	Peak Found	Peak Found	Peak Found	Peak Found	Peak Found	Peak Found	Peak Found	Peak Found	High	High
High	Master Protein	Q91WJ0	Fibroblast growth factor receptor substrate 3 OS=Mus musculus OX=10090 GN=Frs3 PE=1 SV=3	2	2	Frs3	1.463	0.567464	Peak Found	Peak Found	Peak Found	Not Found	Peak Found	Peak Found	High	Not Found	High	Not Found
High	Master Protein	P55772	Ectonucleoside triphosphate diphosphohydrolase 1 OS=Mus musculus OX=10090 GN=Entpd1 PE=1 SV=1	3	3	Entpd1	0.783	0.567464	Peak Found	Peak Found	Peak Found	Peak Found	Peak Found	Peak Found	High	High	Peak Found	Peak Found
High	Master Protein	P62889	60S ribosomal protein L30 OS=Mus musculus OX=10090 GN=Rpl30 PE=1 SV=2	27	6	Rpl30	0.86	0.567464	High	High	High	High	High	High	High	High	High	High
High	Master Protein	Q61151	Serine/threonine-protein phosphatase 2A 56 kDa regulatory subunit epsilon isoform OS=Mus musculus OX=10090 GN=Ppp2r5e PE=1 SV=3	139	13	Ppp2r5e	1.085	0.567464	High	High	High	High	High	High	High	High	High	High
High	Master Protein	A2AJA9	Apical junction component 1 homolog OS=Mus musculus OX=10090 GN=Ajm1 PE=1 SV=1	123	24	Ajm1	1.089	0.567464	High	High	High	High	High	High	High	High	High	High
High	Master Protein	Q9QXS1	Plectin OS=Mus musculus OX=10090 GN=Plec PE=1 SV=3	1436	191	Plec	1.095	0.567655	High	High	High	High	High	High	High	High	High	High
High	Master Protein	P35979	60S ribosomal protein L12 OS=Mus musculus OX=10090 GN=Rpl12 PE=1 SV=2	78	7	Rpl12	0.891	0.568756	High	High	High	High	High	High	High	High	High	High
High	Master Protein	P54071	Isocitrate dehydrogenase [NADP], mitochondrial OS=Mus musculus OX=10090 GN=Idh2 PE=1 SV=3	292	25	Idh2	1.095	0.568756	High	High	High	High	High	High	High	High	High	High
High	Master Protein	Q62465	Synaptic vesicle membrane protein VAT-1 homolog OS=Mus musculus OX=10090 GN=Vat1 PE=1 SV=3	111	13	Vat1	0.886	0.568977	High	High	High	High	High	High	High	High	High	High
High	Master Protein	P97326	Cadherin-6 OS=Mus musculus OX=10090 GN=Cdh6 PE=1 SV=2	18	5	Cdh6	1.238	0.569634	High	High	High	Peak Found	Peak Found	Peak Found	High	Peak Found	High	Peak Found
High	Master Protein	Q8BGR6	ADP-ribosylation factor-like protein 15 OS=Mus musculus OX=10090 GN=Arl15 PE=1 SV=1	26	7	Arl15	1.086	0.569634	High	High	High	High	High	High	High	High	High	High
High	Master Protein	Q9CQ80	Vacuolar protein-sorting-associated protein 25 OS=Mus musculus OX=10090 GN=Vps25 PE=1 SV=1	35	9	Vps25	0.838	0.569634	High	High	High	High	High	High	High	High	High	High
High	Master Protein	Q4VA93	Protein kinase C OS=Mus musculus OX=10090 GN=Prkca PE=1 SV=1	256	14	Prkca	0.891	0.569634	High	High	High	High	High	High	High	High	High	High
High	Master Protein	E9QAD8	IQ motif and SEC7 domain-containing protein 2 OS=Mus musculus OX=10090 GN=Iqsec2 PE=1 SV=1	434	45	Iqsec2	1.098	0.569634	High	High	High	High	High	High	High	High	High	High
High	Master Protein	Q3UCV8	Ubiquitin thioesterase otulin OS=Mus musculus OX=10090 GN=Otulin PE=1 SV=1	5	2	Otulin	1.272	0.57162	High	Peak Found	High	High	Peak Found	Peak Found	Peak Found	Peak Found	Peak Found	Peak Found
High	Master Protein	Q3U1Y4	DENN domain-containing protein 4B OS=Mus musculus OX=10090 GN=Dennd4b PE=1 SV=2	11	3	Dennd4b	0.826	0.57162	High	High	High	Peak Found	Peak Found	High	High	High	Peak Found	High
High	Master Protein	Q9ET30	Transmembrane 9 superfamily member 3 OS=Mus musculus OX=10090 GN=Tm9sf3 PE=1 SV=1	43	7	Tm9sf3	1.128	0.57162	High	High	High	High	High	High	High	High	High	High
High	Master Protein	Q3U422	Complex I-9kD OS=Mus musculus OX=10090 GN=Ndufv3 PE=1 SV=1	106	13	Ndufv3	1.1	0.57162	High	High	High	High	High	High	High	High	High	High
High	Master Protein	Q9Z1Q5	Chloride intracellular channel protein 1 OS=Mus musculus OX=10090 GN=Clic1 PE=1 SV=3	18	6	Clic1	0.839	0.574477	High	Peak Found	High	High	High	High	High	High	High	High
High	Master Protein	Q9D1D4	Transmembrane emp24 domain-containing protein 10 OS=Mus musculus OX=10090 GN=Tmed10 PE=1 SV=1	59	7	Tmed10	1.102	0.574717	High	High	High	High	High	High	High	High	High	High
High	Master Protein	P19536	Cytochrome c oxidase subunit 5B, mitochondrial OS=Mus musculus OX=10090 GN=Cox5b PE=1 SV=1	203	7	Cox5b	1.092	0.574717	High	High	High	High	High	High	High	High	High	High
High	Master Protein	Q922Y1	UBX domain-containing protein 1 OS=Mus musculus OX=10090 GN=Ubxn1 PE=1 SV=1	18	7	Ubxn1	1.086	0.574717	High	High	High	High	High	High	High	High	Peak Found	High
High	Master Protein	P52479	Ubiquitin carboxyl-terminal hydrolase 10 OS=Mus musculus OX=10090 GN=Usp10 PE=1 SV=3	22	8	Usp10	0.828	0.574717	High	High	High	High	High	High	High	High	High	High
High	Master Protein	G5E8D5	Metabotropic glutamate receptor 7 OS=Mus musculus OX=10090 GN=Grm7 PE=1 SV=1	61	14	Grm7	1.097	0.574717	High	High	High	High	High	High	High	High	High	High
High	Master Protein	P16332	Methylmalonyl-CoA mutase, mitochondrial OS=Mus musculus OX=10090 GN=Mmut PE=1 SV=2	100	16	Mmut	1.087	0.574717	High	High	High	High	High	High	High	High	High	High
High	Master Protein	Q8CGK3	Lon protease homolog, mitochondrial OS=Mus musculus OX=10090 GN=Lonp1 PE=1 SV=2	317	38	Lonp1	1.094	0.574781	High	High	High	High	High	High	High	High	High	High
High	Master Protein	A0A286YCI8	Sorbin and SH3 domain-containing protein 1 OS=Mus musculus OX=10090 GN=Sorbs1 PE=1 SV=1	118	12	Sorbs1	1.099	0.576098	High	High	High	High	High	High	High	High	High	High
High	Master Protein	Q5SYD0	Unconventional myosin-Id OS=Mus musculus OX=10090 GN=Myo1d PE=1 SV=1	30	11	Myo1d	1.171	0.576099	High	High	High	High	High	High	High	High	High	High
High	Master Protein	Q6RKD8	Leucine-rich repeat transmembrane protein FLRT1 OS=Mus musculus OX=10090 GN=Flrt1 PE=1 SV=2	6	2	Flrt1	1.265	0.576791	High	High	Peak Found	Peak Found	Peak Found	Peak Found	High	Peak Found	Peak Found	Peak Found
High	Master Protein	Q05BD6	Glutamate receptor, metabotropic 8 OS=Mus musculus OX=10090 GN=Grm8 PE=1 SV=1	7	3	Grm8	1.236	0.576791	High	Peak Found	High	High	High	Peak Found	Peak Found	Peak Found	High	High
High	Master Protein	Q99MR3	Solute carrier family 12 member 9 OS=Mus musculus OX=10090 GN=Slc12a9 PE=1 SV=2	13	5	Slc12a9	0.823	0.576791	High	Peak Found	High	High	High	High	High	Peak Found	High	High
High	Master Protein	P61963	DDB1- and CUL4-associated factor 7 OS=Mus musculus OX=10090 GN=Dcaf7 PE=1 SV=1	21	6	Dcaf7	1.185	0.576791	High	High	High	High	High	High	High	High	High	High
High	Master Protein	P28658	Ataxin-10 OS=Mus musculus OX=10090 GN=Atxn10 PE=1 SV=2	54	9	Atxn10	0.859	0.576791	High	High	High	High	High	High	High	High	High	High
High	Master Protein	Q9JKB1	Ubiquitin carboxyl-terminal hydrolase isozyme L3 OS=Mus musculus OX=10090 GN=Uchl3 PE=1 SV=2	92	12	Uchl3	0.887	0.576791	High	High	High	High	High	High	High	High	High	High
High	Master Protein	Q8C570	mRNA export factor OS=Mus musculus OX=10090 GN=Rae1 PE=1 SV=1	9	2	Rae1	0.812	0.578611	High	Peak Found	Peak Found	Peak Found	Peak Found	Peak Found	High	High	High	High
High	Master Protein	Q99LY9	NADH dehydrogenase [ubiquinone] iron-sulfur protein 5 OS=Mus musculus OX=10090 GN=Ndufs5 PE=1 SV=3	156	9	Ndufs5	1.092	0.578611	High	High	High	High	High	High	High	High	High	High
High	Master Protein	Q9CQA3	Succinate dehydrogenase [ubiquinone] iron-sulfur subunit, mitochondrial OS=Mus musculus OX=10090 GN=Sdhb PE=1 SV=1	380	18	Sdhb	1.093	0.578611	High	High	High	High	High	High	High	High	High	High
High	Master Protein	Q14BI1	Slc24a2 protein OS=Mus musculus OX=10090 GN=Slc24a2 PE=1 SV=1	209	9	Slc24a2	1.093	0.579435	High	High	High	High	High	High	High	High	High	High
High	Master Protein	Q9WTP7	GTP:AMP phosphotransferase AK3, mitochondrial OS=Mus musculus OX=10090 GN=Ak3 PE=1 SV=3	177	15	Ak3	1.09	0.580225	High	High	High	High	High	High	High	High	High	High
High	Master Protein	Q8BZZ3	NEDD4-like E3 ubiquitin-protein ligase WWP1 OS=Mus musculus OX=10090 GN=Wwp1 PE=1 SV=2	7	2	Wwp1	1.201	0.580498	Peak Found	Peak Found	Peak Found	Peak Found	High	High	Peak Found	Peak Found	Peak Found	High
High	Master Protein	B0F2B4	Neuroligin 4-like OS=Mus musculus OX=10090 GN=Nlgn4l PE=1 SV=1	29	4	Nlgn4l	1.185	0.580498	High	High	High	High	High	High	Peak Found	Peak Found	High	High
High	Master Protein	Q8CFE4	SCY1-like protein 2 OS=Mus musculus OX=10090 GN=Scyl2 PE=1 SV=1	43	11	Scyl2	0.865	0.581154	High	High	High	High	High	High	High	High	High	High
High	Master Protein	P03921	NADH-ubiquinone oxidoreductase chain 5 OS=Mus musculus OX=10090 GN=Mtnd5 PE=1 SV=3	41	4	Mtnd5	1.085	0.581685	High	High	High	High	High	High	High	High	High	High
High	Master Protein	A0A0R4J023	Methylglutaconyl-CoA hydratase, mitochondrial OS=Mus musculus OX=10090 GN=Auh PE=1 SV=1	149	12	Auh	1.085	0.583673	High	High	High	High	High	High	High	High	High	High
High	Master Protein	O89051	Integral membrane protein 2B OS=Mus musculus OX=10090 GN=Itm2b PE=1 SV=1	48	8	Itm2b	1.102	0.584067	High	High	High	High	High	High	High	High	High	High
High	Master Protein	O35668	Huntingtin-associated protein 1 OS=Mus musculus OX=10090 GN=Hap1 PE=1 SV=1	10	5	Hap1	0.818	0.584907	Peak Found	Peak Found	High	Peak Found	High	High	Peak Found	High	High	High
High	Master Protein	O08914	Fatty-acid amide hydrolase 1 OS=Mus musculus OX=10090 GN=Faah PE=1 SV=1	110	15	Faah	0.879	0.585042	High	High	High	High	High	High	High	High	High	High
High	Master Protein	Q8BMF4	Dihydrolipoyllysine-residue acetyltransferase component of pyruvate dehydrogenase complex, mitochondrial OS=Mus musculus OX=10090 GN=Dlat PE=1 SV=2	517	23	Dlat	1.093	0.585042	High	High	High	High	High	High	High	High	High	High
High	Master Protein	O54962	Barrier-to-autointegration factor OS=Mus musculus OX=10090 GN=Banf1 PE=1 SV=1	21	3	Banf1	0.83	0.586485	High	High	High	High	High	High	High	High	High	High
High	Master Protein	Q8CFA2	Aminomethyltransferase, mitochondrial OS=Mus musculus OX=10090 GN=Amt PE=1 SV=1	15	4	Amt	1.296	0.588308	High	High	High	High	High	Peak Found	High	High	High	High
High	Master Protein	Q3UMR5	Calcium uniporter protein, mitochondrial OS=Mus musculus OX=10090 GN=Mcu PE=1 SV=2	144	16	Mcu	1.089	0.58943	High	High	High	High	High	High	High	High	High	High
High	Master Protein	P16460	Argininosuccinate synthase OS=Mus musculus OX=10090 GN=Ass1 PE=1 SV=1	78	15	Ass1	0.893	0.592248	High	High	High	High	High	High	High	High	High	High
High	Master Protein	F6UK66	Coiled-coil domain-containing protein 50 (Fragment) OS=Mus musculus OX=10090 GN=Ccdc50 PE=1 SV=1	7	2	Ccdc50	1.26	0.592599	Peak Found	High	High	Peak Found	High	Peak Found	High	High	High	High
High	Master Protein	Q60648	Ganglioside GM2 activator OS=Mus musculus OX=10090 GN=Gm2a PE=1 SV=2	10	3	Gm2a	1.147	0.592599	Peak Found	Peak Found	High	High	High	High	High	Peak Found	Peak Found	High
High	Master Protein	Q3UTZ3	Microtubule-associated protein 11 OS=Mus musculus OX=10090 GN=MAP11 PE=1 SV=1	8	3		1.244	0.592599	High	High	High	High	High	Peak Found	Peak Found	High	Peak Found	Peak Found
High	Master Protein	Q64152	Transcription factor BTF3 OS=Mus musculus OX=10090 GN=Btf3 PE=1 SV=3	25	4	Btf3	0.867	0.592599	High	High	High	High	High	High	High	High	High	High
High	Master Protein	Q8BWR2	PITH domain-containing protein 1 OS=Mus musculus OX=10090 GN=Pithd1 PE=1 SV=1	30	5	Pithd1	0.845	0.592599	High	High	High	High	High	High	High	High	High	High
High	Master Protein	Q9QZE7	Translin-associated protein X OS=Mus musculus OX=10090 GN=Tsnax PE=1 SV=1	13	5	Tsnax	0.834	0.592599	High	High	High	High	High	High	Peak Found	High	High	High
High	Master Protein	Q9ERR1	Nuclear distribution protein nudE-like 1 OS=Mus musculus OX=10090 GN=Ndel1 PE=1 SV=2	57	10	Ndel1	1.102	0.592599	High	High	High	High	High	High	High	High	High	High
High	Master Protein	P10649	Glutathione S-transferase Mu 1 OS=Mus musculus OX=10090 GN=Gstm1 PE=1 SV=2	419	17	Gstm1	0.915	0.592599	High	High	High	High	High	High	High	High	High	High
High	Master Protein	Q9QYS2	Metabotropic glutamate receptor 3 OS=Mus musculus OX=10090 GN=Grm3 PE=1 SV=1	244	20	Grm3	0.915	0.592599	High	High	High	High	High	High	High	High	High	High
High	Master Protein	Q8JZQ2	AFG3-like protein 2 OS=Mus musculus OX=10090 GN=Afg3l2 PE=1 SV=1	196	30	Afg3l2	1.081	0.592599	High	High	High	High	High	High	High	High	High	High
High	Master Protein	P62069	Ubiquitin carboxyl-terminal hydrolase 46 OS=Mus musculus OX=10090 GN=Usp46 PE=1 SV=1	34	3	Usp46	0.865	0.593306	High	High	High	High	High	High	High	High	High	High
High	Master Protein	D3YWY6	Mitochondrial pyruvate carrier OS=Mus musculus OX=10090 GN=Mpc1 PE=1 SV=1	19	2	Mpc1	0.907	0.594355	High	High	High	High	High	High	High	High	High	High
High	Master Protein	Q6PHQ8	N-alpha-acetyltransferase 35, NatC auxiliary subunit OS=Mus musculus OX=10090 GN=Naa35 PE=1 SV=1	14	7	Naa35	0.815	0.594355	Peak Found	High	High	Peak Found	High	High	Peak Found	High	High	Peak Found
High	Master Protein	O55125	Protein NipSnap homolog 1 OS=Mus musculus OX=10090 GN=Nipsnap1 PE=1 SV=1	192	10	Nipsnap1	0.915	0.594355	High	High	High	High	High	High	High	High	High	High
High	Master Protein	Q921G7	Electron transfer flavoprotein-ubiquinone oxidoreductase, mitochondrial OS=Mus musculus OX=10090 GN=Etfdh PE=1 SV=1	180	22	Etfdh	1.084	0.594355	High	High	High	High	High	High	High	High	High	High
High	Master Protein	P24668	Cation-dependent mannose-6-phosphate receptor OS=Mus musculus OX=10090 GN=M6pr PE=1 SV=1	32	6	M6pr	0.873	0.594405	High	High	High	High	High	High	High	High	High	High
High	Master Protein	Q8CDM8	Protein FAM160B1 OS=Mus musculus OX=10090 GN=Fam160b1 PE=1 SV=2	6	3	Fam160b1	1.304	0.595875	High	High	Peak Found	Peak Found	Peak Found	High	Peak Found	High	High	Peak Found
High	Master Protein	O55057	Retinal rod rhodopsin-sensitive cGMP 3',5'-cyclic phosphodiesterase subunit delta OS=Mus musculus OX=10090 GN=Pde6d PE=1 SV=1	20	2	Pde6d	0.813	0.596184	High	High	High	High	High	High	High	High	High	High
High	Master Protein	H7BX36	Serine/threonine-protein kinase DCLK1 OS=Mus musculus OX=10090 GN=Dclk1 PE=1 SV=1	96	3	Dclk1	0.797	0.596184	High	High	High	High	High	High	High	High	High	High
High	Master Protein	Q60996	Serine/threonine-protein phosphatase 2A 56 kDa regulatory subunit gamma isoform OS=Mus musculus OX=10090 GN=Ppp2r5c PE=1 SV=2	75	3	Ppp2r5c	0.867	0.596184	High	High	High	High	High	High	High	High	High	Peak Found
High	Master Protein	P00397	Cytochrome c oxidase subunit 1 OS=Mus musculus OX=10090 GN=Mtco1 PE=1 SV=2	42	3	Mtco1	0.881	0.598211	High	High	High	High	High	High	High	High	High	High
High	Master Protein	Q8R104	NAD-dependent protein deacetylase sirtuin-3 OS=Mus musculus OX=10090 GN=Sirt3 PE=1 SV=2	8	2	Sirt3	1.243	0.598653	Peak Found	High	High	Peak Found	High	High	Peak Found	High	Peak Found	Peak Found
High	Master Protein	F6ZLN8	Vacuolar protein sorting-associated protein 8 homolog (Fragment) OS=Mus musculus OX=10090 GN=Vps8 PE=1 SV=1	10	5	Vps8	1.197	0.598653	High	Peak Found	High	Peak Found	High	High	Peak Found	High	High	High
High	Master Protein	A0A338P6P7	Protein kinase C and casein kinase substrate in neurons protein 2 (Fragment) OS=Mus musculus OX=10090 GN=Pacsin2 PE=1 SV=1	73	2	Pacsin2	0.834	0.601089	High	High	High	High	High	High	High	High	High	High
High	Master Protein	Q6GQW0	Ankyrin repeat and BTB/POZ domain-containing protein BTBD11 OS=Mus musculus OX=10090 GN=Btbd11 PE=2 SV=2	5	4	Btbd11	1.234	0.601317	Peak Found	Peak Found	High	Peak Found	Peak Found	High	Peak Found	High	Peak Found	Peak Found
High	Master Protein	E0CZ04	Gamma-glutamylaminecyclotransferase (Fragment) OS=Mus musculus OX=10090 GN=Ggact PE=1 SV=1	4	2	Ggact	0.701	0.603643	Peak Found	Peak Found	High	Peak Found	Peak Found	High	Peak Found	Peak Found	High	High
High	Master Protein	Q6DFW0	Guanine nucleotide exchange C9orf72 homolog OS=Mus musculus OX=10090 PE=1 SV=2	7	2		1.255	0.603767	High	High	Peak Found	High	Peak Found	Peak Found	High	High	High	Peak Found
High	Master Protein	Q9CQS4	Solute carrier family 25 member 46 OS=Mus musculus OX=10090 GN=Slc25a46 PE=1 SV=1	112	10	Slc25a46	1.096	0.605597	High	High	High	High	High	High	High	High	High	High
High	Master Protein	Q80Y83	Dixin OS=Mus musculus OX=10090 GN=Dixdc1 PE=1 SV=1	6	2	Dixdc1	1.235	0.607107	Peak Found	High	High	High	High	Peak Found	Peak Found	Peak Found	Peak Found	High
High	Master Protein	Q80WT0	Junctophilin-4 OS=Mus musculus OX=10090 GN=Jph4 PE=2 SV=1	15	6	Jph4	1.129	0.607615	High	High	High	High	High	High	High	High	High	Peak Found
High	Master Protein	A0A0G2JDK6	Adhesion G protein-coupled receptor L2 OS=Mus musculus OX=10090 GN=Adgrl2 PE=1 SV=1	75	16	Adgrl2	1.083	0.607615	High	High	High	High	High	High	High	High	High	High
High	Master Protein	Q8C1Y8	Vacuolar fusion protein CCZ1 homolog OS=Mus musculus OX=10090 GN=Ccz1 PE=1 SV=1	20	5	Ccz1	1.177	0.608357	High	High	High	High	High	High	High	High	High	High
High	Master Protein	Q8BGC4	Prostaglandin reductase-3 OS=Mus musculus OX=10090 GN=Zadh2 PE=1 SV=1	33	8	Zadh2	1.104	0.608357	High	High	High	High	High	High	High	High	High	High
High	Master Protein	Q8CAQ8	MICOS complex subunit Mic60 OS=Mus musculus OX=10090 GN=Immt PE=1 SV=1	739	4	Immt	1.09	0.609674	High	High	High	High	High	High	High	High	High	High
High	Master Protein	E9Q0H6	Fatty acid-binding protein, brain OS=Mus musculus OX=10090 GN=Fabp7 PE=1 SV=1	28	4	Fabp7	0.873	0.609674	High	High	High	High	High	High	High	High	High	High
High	Master Protein	P22315	Ferrochelatase, mitochondrial OS=Mus musculus OX=10090 GN=Fech PE=1 SV=2	138	14	Fech	1.085	0.609674	High	High	High	High	High	High	High	High	High	High
High	Master Protein	O55234	Proteasome subunit beta type-5 OS=Mus musculus OX=10090 GN=Psmb5 PE=1 SV=3	78	11	Psmb5	0.893	0.609702	High	High	High	High	High	High	High	High	High	High
High	Master Protein	Q00493	Carboxypeptidase E OS=Mus musculus OX=10090 GN=Cpe PE=1 SV=2	112	16	Cpe	0.903	0.61182	High	High	High	High	High	High	High	High	High	High
High	Master Protein	P62317	Small nuclear ribonucleoprotein Sm D2 OS=Mus musculus OX=10090 GN=Snrpd2 PE=1 SV=1	2	2	Snrpd2	0.7	0.612637	Peak Found	Peak Found	Not Found	High	Not Found	Peak Found	Not Found	Not Found	High	Not Found
High	Master Protein	Q91V36	Nuclear receptor-binding protein 2 OS=Mus musculus OX=10090 GN=Nrbp2 PE=1 SV=2	22	6	Nrbp2	1.136	0.614926	High	High	High	High	High	High	High	High	High	High
High	Master Protein	Q64516	Glycerol kinase OS=Mus musculus OX=10090 GN=Gk PE=1 SV=2	132	18	Gk	1.078	0.614926	High	High	High	High	High	High	High	High	High	High
High	Master Protein	Q91W89	Alpha-mannosidase 2C1 OS=Mus musculus OX=10090 GN=Man2c1 PE=1 SV=1	33	7	Man2c1	0.853	0.61681	High	High	High	High	High	High	High	High	High	High
High	Master Protein	P62331	ADP-ribosylation factor 6 OS=Mus musculus OX=10090 GN=Arf6 PE=1 SV=2	52	6	Arf6	0.873	0.618555	High	High	High	High	High	High	High	High	High	High
High	Master Protein	E9Q6H8	Pleckstrin homology domain-containing, family A member 5 OS=Mus musculus OX=10090 GN=Plekha5 PE=1 SV=1	27	13	Plekha5	1.128	0.618555	High	High	High	High	High	High	Peak Found	High	High	High
High	Master Protein	Q9CQ86	Migration and invasion enhancer 1 OS=Mus musculus OX=10090 GN=Mien1 PE=1 SV=1	16	3	Mien1	0.839	0.619112	High	High	High	High	High	High	High	High	Peak Found	High
High	Master Protein	P61161	Actin-related protein 2 OS=Mus musculus OX=10090 GN=Actr2 PE=1 SV=1	284	17	Actr2	0.917	0.619276	High	High	High	High	High	High	High	High	High	High
High	Master Protein	Q9D7N6	39S ribosomal protein L30, mitochondrial OS=Mus musculus OX=10090 GN=Mrpl30 PE=1 SV=1	9	2	Mrpl30	1.317	0.619716	Peak Found	High	High	Peak Found	Peak Found	High	High	High	High	High
High	Master Protein	Q8BX94	Oxysterol-binding protein-related protein 2 OS=Mus musculus OX=10090 GN=Osbpl2 PE=1 SV=1	20	4	Osbpl2	0.819	0.620041	Peak Found	High	High	High	High	High	High	High	Peak Found	High
High	Master Protein	P70677	Caspase-3 OS=Mus musculus OX=10090 GN=Casp3 PE=1 SV=1	18	7	Casp3	0.829	0.62006	High	High	Peak Found	High	High	Peak Found	High	High	High	Peak Found
High	Master Protein	Q6DFY2	Opioid-binding protein/cell adhesion molecule-like OS=Mus musculus OX=10090 GN=Opcml PE=1 SV=1	331	2	Opcml	1.083	0.620282	High	High	High	High	High	High	High	High	High	High
High	Master Protein	Q9Z140	Copine-6 OS=Mus musculus OX=10090 GN=Cpne6 PE=1 SV=1	272	26	Cpne6	0.911	0.620375	High	High	High	High	High	High	High	High	High	High
High	Master Protein	Q8C0J2	Autophagy-related protein 16-1 OS=Mus musculus OX=10090 GN=Atg16l1 PE=1 SV=1	9	5	Atg16l1	0.839	0.622101	Peak Found	Peak Found	High	Peak Found	Peak Found	High	Peak Found	High	High	High
High	Master Protein	Q9WV55	Vesicle-associated membrane protein-associated protein A OS=Mus musculus OX=10090 GN=Vapa PE=1 SV=2	181	8	Vapa	1.09	0.623034	High	High	High	High	High	High	High	High	High	High
High	Master Protein	Q60805	Tyrosine-protein kinase Mer OS=Mus musculus OX=10090 GN=Mertk PE=1 SV=1	10	5	Mertk	0.835	0.62354	Peak Found	High	High	Peak Found	High	High	High	Peak Found	High	High
High	Master Protein	G3UZI2	Heterogeneous nuclear ribonucleoprotein Q OS=Mus musculus OX=10090 GN=Syncrip PE=1 SV=1	140	9	Syncrip	0.9	0.624224	High	High	High	High	High	High	High	High	High	High
High	Master Protein	Q8R164	Valacyclovir hydrolase OS=Mus musculus OX=10090 GN=Bphl PE=1 SV=1	157	16	Bphl	1.083	0.624224	High	High	High	High	High	High	High	High	High	High
High	Master Protein	Q61200	Neurexophilin-1 OS=Mus musculus OX=10090 GN=Nxph1 PE=2 SV=2	3	2	Nxph1	1.399	0.62502	Peak Found	Peak Found	Peak Found	Peak Found	High	Not Found	High	Peak Found	High	Peak Found
High	Master Protein	Q9CRA9	FGFR1 oncogene partner 2 homolog OS=Mus musculus OX=10090 GN=Fgfr1op2 PE=1 SV=1	13	5	Fgfr1op2	0.869	0.625172	Peak Found	High	High	High	High	High	Peak Found	Peak Found	High	High
High	Master Protein	A0A0R4J0D3	Dolichyl-diphosphooligosaccharide--protein glycotransferase OS=Mus musculus OX=10090 GN=Stt3b PE=1 SV=1	22	6	Stt3b	0.831	0.625881	High	High	High	High	Peak Found	High	High	High	High	High
High	Master Protein	Q8QZT2	Centriole, cilia and spindle-associated protein OS=Mus musculus OX=10090 GN=Ccsap PE=1 SV=1	23	5	Ccsap	0.846	0.626001	High	High	High	High	High	High	High	High	High	High
High	Master Protein	Q9D394	Protein RUFY3 OS=Mus musculus OX=10090 GN=Rufy3 PE=1 SV=1	251	2	Rufy3	0.801	0.626537	High	High	Not Found	Peak Found	Peak Found	High	Peak Found	High	High	Peak Found
High	Master Protein	H7BX95	Serine/arginine-rich splicing factor 1 OS=Mus musculus OX=10090 GN=Srsf1 PE=1 SV=1	13	4	Srsf1	0.812	0.626537	High	High	Peak Found	Peak Found	Peak Found	High	High	High	High	High
High	Master Protein	Q8CFT0	RELT-like 2 OS=Mus musculus OX=10090 GN=Rell2 PE=1 SV=1	38	6	Rell2	1.126	0.62716	High	High	High	High	High	High	High	High	High	High
High	Master Protein	Q6ZPF3	T-lymphoma invasion and metastasis-inducing protein 2 OS=Mus musculus OX=10090 GN=Tiam2 PE=1 SV=2	37	7	Tiam2	0.872	0.628326	High	High	High	High	High	High	High	High	High	High
High	Master Protein	Q924S7	Sprouty-related, EVH1 domain-containing protein 2 OS=Mus musculus OX=10090 GN=Spred2 PE=1 SV=1	10	4	Spred2	1.238	0.630099	Peak Found	Peak Found	Peak Found	High	Peak Found	High	High	Peak Found	Peak Found	High
High	Master Protein	P63054	Calmodulin regulator protein PCP4 OS=Mus musculus OX=10090 GN=Pcp4 PE=3 SV=2	111	4	Pcp4	1.085	0.630163	High	High	High	High	High	High	High	High	High	High
High	Master Protein	Q9QYA2	Mitochondrial import receptor subunit TOM40 homolog OS=Mus musculus OX=10090 GN=Tomm40 PE=1 SV=3	71	8	Tomm40	0.88	0.630749	High	High	High	High	High	High	High	High	High	High
High	Master Protein	F8WJ64	Acyl carrier protein (Fragment) OS=Mus musculus OX=10090 GN=Ndufab1 PE=1 SV=1	74	4	Ndufab1	1.084	0.630932	High	High	High	High	High	High	High	High	High	High
High	Master Protein	Q8BTY1	Kynurenine--oxoglutarate transaminase 1 OS=Mus musculus OX=10090 GN=Kyat1 PE=1 SV=1	22	4	Kyat1	0.808	0.630932	High	High	High	High	High	High	High	High	High	High
High	Master Protein	P84099	60S ribosomal protein L19 OS=Mus musculus OX=10090 GN=Rpl19 PE=1 SV=1	28	6	Rpl19	0.876	0.630932	High	High	High	High	High	High	High	High	High	High
High	Master Protein	P54763	Ephrin type-B receptor 2 OS=Mus musculus OX=10090 GN=Ephb2 PE=1 SV=3	42	7	Ephb2	1.145	0.631074	High	High	Peak Found	High	High	High	High	High	High	High
High	Master Protein	Q6P5F6	Zinc transporter ZIP10 OS=Mus musculus OX=10090 GN=Slc39a10 PE=1 SV=1	49	7	Slc39a10	1.1	0.631442	High	High	High	High	High	High	High	High	High	High
High	Master Protein	B2RXT3	Ogdhl protein OS=Mus musculus OX=10090 GN=Ogdhl PE=1 SV=1	560	38	Ogdhl	1.088	0.631442	High	High	High	High	High	High	High	High	High	High
High	Master Protein	A0A668KLC6	Microtubule-associated protein OS=Mus musculus OX=10090 GN=Map2 PE=1 SV=1	1569	89	Map2	0.918	0.631442	High	High	High	High	High	High	High	High	High	High
High	Master Protein	G3X9M0	28S ribosomal protein S29, mitochondrial OS=Mus musculus OX=10090 GN=Dap3 PE=1 SV=1	55	7	Dap3	1.125	0.632216	High	High	High	High	High	High	High	High	High	High
High	Master Protein	E9Q8N8	Anion exchange protein OS=Mus musculus OX=10090 GN=Slc4a4 PE=1 SV=1	331	4	Slc4a4	0.919	0.632327	High	High	High	High	High	High	High	High	High	High
High	Master Protein	P13707	Glycerol-3-phosphate dehydrogenase [NAD(+)], cytoplasmic OS=Mus musculus OX=10090 GN=Gpd1 PE=1 SV=3	142	15	Gpd1	1.087	0.63332	High	High	High	High	High	High	High	High	High	High
High	Master Protein	P10852	4F2 cell-surface antigen heavy chain OS=Mus musculus OX=10090 GN=Slc3a2 PE=1 SV=1	471	32	Slc3a2	1.087	0.633819	High	High	High	High	High	High	High	High	High	High
High	Master Protein	Q9DC28	Casein kinase I isoform delta OS=Mus musculus OX=10090 GN=Csnk1d PE=1 SV=2	48	5	Csnk1d	0.879	0.633957	High	High	High	High	High	High	High	High	High	High
High	Master Protein	Q8CGV2	Tryptophan 5-hydroxylase 2 OS=Mus musculus OX=10090 GN=Tph2 PE=1 SV=2	5	4	Tph2	0.802	0.634482	Peak Found	Peak Found	Peak Found	Peak Found	Peak Found	High	Peak Found	High	Peak Found	High
High	Master Protein	P53810	Phosphatidylinositol transfer protein alpha isoform OS=Mus musculus OX=10090 GN=Pitpna PE=1 SV=2	236	16	Pitpna	0.919	0.634482	High	High	High	High	High	High	High	High	High	High
High	Master Protein	P14685	26S proteasome non-ATPase regulatory subunit 3 OS=Mus musculus OX=10090 GN=Psmd3 PE=1 SV=3	132	20	Psmd3	0.897	0.634482	High	High	High	High	High	High	High	High	High	High
High	Master Protein	Q9JIG7	Coiled-coil domain-containing protein 22 OS=Mus musculus OX=10090 GN=Ccdc22 PE=1 SV=1	39	12	Ccdc22	0.869	0.635993	High	High	High	High	High	High	High	High	High	High
High	Master Protein	P08553	Neurofilament medium polypeptide OS=Mus musculus OX=10090 GN=Nefm PE=1 SV=4	408	31	Nefm	1.087	0.636754	High	High	High	High	High	High	High	High	High	High
High	Master Protein	A0A1D5RLN6	RIKEN cDNA 2900026A02 gene OS=Mus musculus OX=10090 GN=2900026A02Rik PE=1 SV=1	33	7	2900026A02Rik	1.098	0.637234	High	High	High	High	High	High	High	High	High	High
High	Master Protein	P37804	Transgelin OS=Mus musculus OX=10090 GN=Tagln PE=1 SV=3	12	5	Tagln	0.873	0.637998	Peak Found	High	High	Peak Found	High	High	Peak Found	High	High	High
High	Master Protein	Q9CQC7	NADH dehydrogenase [ubiquinone] 1 beta subcomplex subunit 4 OS=Mus musculus OX=10090 GN=Ndufb4 PE=1 SV=3	100	10	Ndufb4	1.087	0.638278	High	High	High	High	High	High	High	High	High	High
High	Master Protein	A2AUF7	Rab9 effector protein with kelch motifs OS=Mus musculus OX=10090 GN=Rabepk PE=1 SV=1	2	2	Rabepk	1.4	0.638305	Not Found	Peak Found	Peak Found	Not Found	Peak Found	High	Not Found	Not Found	Peak Found	High
High	Master Protein	P48318	Glutamate decarboxylase 1 OS=Mus musculus OX=10090 GN=Gad1 PE=1 SV=2	183	19	Gad1	0.905	0.638692	High	High	High	High	High	High	High	High	High	High
High	Master Protein	J3QP43	Protein stum homolog OS=Mus musculus OX=10090 GN=Stum PE=1 SV=1	45	3	Stum	1.079	0.639068	High	High	High	High	High	High	High	High	High	High
High	Master Protein	Q9ES56	Trafficking protein particle complex subunit 4 OS=Mus musculus OX=10090 GN=Trappc4 PE=1 SV=1	20	4	Trappc4	0.811	0.639642	High	High	High	Peak Found	High	High	High	High	High	High
High	Master Protein	P24529	Tyrosine 3-monooxygenase OS=Mus musculus OX=10090 GN=Th PE=1 SV=3	15	5	Th	0.835	0.639642	High	Peak Found	High	High	Peak Found	High	Peak Found	High	Peak Found	High
High	Master Protein	Q99JX3	Golgi reassembly-stacking protein 2 OS=Mus musculus OX=10090 GN=Gorasp2 PE=1 SV=3	42	8	Gorasp2	0.87	0.639642	High	High	High	High	High	High	High	High	High	High
High	Master Protein	B1AXZ5	ELAV-like protein OS=Mus musculus OX=10090 GN=Elavl2 PE=1 SV=1	61	4	Elavl2	0.877	0.641094	High	Peak Found	Peak Found	Peak Found	Peak Found	High	High	High	High	High
High	Master Protein	A2AMH4	Choline transporter-like protein 1 OS=Mus musculus OX=10090 GN=Slc44a1 PE=1 SV=1	51	7	Slc44a1	1.09	0.641493	High	High	High	High	High	High	High	High	High	High
High	Master Protein	Q64735	Complement component receptor 1-like protein OS=Mus musculus OX=10090 GN=Cr1l PE=1 SV=1	29	6	Cr1l	0.852	0.642078	High	High	High	High	High	High	High	High	High	High
High	Master Protein	P51175	Protoporphyrinogen oxidase OS=Mus musculus OX=10090 GN=Ppox PE=1 SV=1	21	5	Ppox	1.177	0.643738	High	High	High	High	High	High	High	High	High	High
High	Master Protein	Q9WVL0	Maleylacetoacetate isomerase OS=Mus musculus OX=10090 GN=Gstz1 PE=1 SV=1	90	10	Gstz1	1.09	0.647026	High	High	High	High	High	High	High	High	High	High
High	Master Protein	Q99N15	17beta-hydroxysteroid dehydrogenase type 10/short chain L-3-hydroxyacyl-CoA dehydrogenase OS=Mus musculus OX=10090 GN=Hsd17b10 PE=1 SV=1	183	15	Hsd17b10	1.086	0.648608	High	High	High	High	High	High	High	High	High	High
High	Master Protein	P43006	Excitatory amino acid transporter 2 OS=Mus musculus OX=10090 GN=Slc1a2 PE=1 SV=1	1457	2	Slc1a2	0.92	0.649913	High	High	High	High	High	High	High	High	High	High
High	Master Protein	E9Q411	Neuroblastoma-amplified sequence OS=Mus musculus OX=10090 GN=Nbas PE=1 SV=1	9	6	Nbas	0.805	0.650045	High	Peak Found	Peak Found	Peak Found	Peak Found	Peak Found	High	High	High	High
High	Master Protein	Q9CWK8	Sorting nexin-2 OS=Mus musculus OX=10090 GN=Snx2 PE=1 SV=2	150	14	Snx2	0.898	0.650045	High	High	High	High	High	High	High	High	High	High
High	Master Protein	F6RJV6	LanC-like protein 2 (Fragment) OS=Mus musculus OX=10090 GN=Lancl2 PE=1 SV=1	227	20	Lancl2	0.914	0.650045	High	High	High	High	High	High	High	High	High	High
High	Master Protein	Q8BIP0	Aspartate--tRNA ligase, mitochondrial OS=Mus musculus OX=10090 GN=Dars2 PE=1 SV=1	7	4	Dars2	1.181	0.650069	High	High	Peak Found	High	High	High	Peak Found	Peak Found	Peak Found	Peak Found
High	Master Protein	Q80XR6	Heterogeneous nuclear ribonucleoprotein A/B OS=Mus musculus OX=10090 GN=Hnrnpab PE=1 SV=1	34	6	Hnrnpab	0.871	0.650176	High	High	High	High	High	High	High	High	High	High
High	Master Protein	G3UVV4	Hexokinase OS=Mus musculus OX=10090 GN=Hk1 PE=1 SV=1	1322	55	Hk1	1.085	0.650176	High	High	High	High	High	High	High	High	High	High
High	Master Protein	Q9D0F3	Protein ERGIC-53 OS=Mus musculus OX=10090 GN=Lman1 PE=1 SV=1	31	6	Lman1	0.875	0.650531	High	High	High	High	High	High	High	High	High	High
High	Master Protein	Q59J78	NADH dehydrogenase [ubiquinone] 1 alpha subcomplex assembly factor 2 OS=Mus musculus OX=10090 GN=Ndufaf2 PE=1 SV=1	57	7	Ndufaf2	1.095	0.650531	High	High	High	High	High	High	High	High	High	High
High	Master Protein	O88307	Sortilin-related receptor OS=Mus musculus OX=10090 GN=Sorl1 PE=1 SV=3	44	19	Sorl1	1.118	0.65122	High	High	High	High	High	High	High	High	High	High
High	Master Protein	Q9EQ20	Methylmalonate-semialdehyde dehydrogenase [acylating], mitochondrial OS=Mus musculus OX=10090 GN=Aldh6a1 PE=1 SV=1	371	33	Aldh6a1	1.085	0.651243	High	High	High	High	High	High	High	High	High	High
High	Master Protein	Q8VDD5	Myosin-9 OS=Mus musculus OX=10090 GN=Myh9 PE=1 SV=4	634	70	Myh9	0.918	0.65169	High	High	High	High	High	High	High	High	High	High
High	Master Protein	P98203	Armadillo repeat protein deleted in velo-cardio-facial syndrome homolog OS=Mus musculus OX=10090 GN=Arvcf PE=1 SV=2	38	10	Arvcf	0.862	0.651834	High	High	High	High	High	High	High	High	High	High
High	Master Protein	O08759	Ubiquitin-protein ligase E3A OS=Mus musculus OX=10090 GN=Ube3a PE=1 SV=2	46	10	Ube3a	0.88	0.655417	High	High	High	High	High	High	High	High	High	High
High	Master Protein	Q9D328	Transmembrane protein 35A OS=Mus musculus OX=10090 GN=Tmem35a PE=1 SV=1	28	2	Tmem35a	0.873	0.655806	High	High	High	High	High	High	High	High	High	High
High	Master Protein	A0A494BBA8	40S ribosomal protein S30 OS=Mus musculus OX=10090 GN=Fau PE=1 SV=1	31	3	Fau	1.074	0.655806	High	High	High	High	High	High	High	High	High	High
High	Master Protein	Q8CJ61	CKLF-like MARVEL transmembrane domain-containing protein 4 OS=Mus musculus OX=10090 GN=Cmtm4 PE=1 SV=1	21	5	Cmtm4	1.1	0.655806	High	Peak Found	High	High	High	High	High	High	High	High
High	Master Protein	D3Z0G6	Regulator of G-protein-signaling 12 OS=Mus musculus OX=10090 GN=Rgs12 PE=1 SV=1	27	8	Rgs12	0.908	0.655806	High	High	High	High	High	High	High	High	High	High
High	Master Protein	A2AIL4	NADH dehydrogenase (ubiquinone) complex I, assembly factor 6 OS=Mus musculus OX=10090 GN=Ndufaf6 PE=1 SV=1	4	2	Ndufaf6	1.389	0.657467	High	High	High	Peak Found	High	Not Found	Peak Found	Peak Found	Peak Found	Peak Found
High	Master Protein	Q3UHI4	Protein TMED8 OS=Mus musculus OX=10090 GN=Tmed8 PE=2 SV=1	4	3	Tmed8	0.815	0.657933	High	Peak Found	Peak Found	Not Found	Peak Found	Peak Found	Peak Found	High	High	High
High	Master Protein	O35405	5'-3' exonuclease PLD3 OS=Mus musculus OX=10090 GN=Pld3 PE=1 SV=1	68	9	Pld3	0.895	0.657933	High	High	High	High	High	High	High	High	High	High
High	Master Protein	G5E8Q0	Lysosomal-trafficking regulator OS=Mus musculus OX=10090 GN=Lyst PE=1 SV=1	13	4	Lyst	1.369	0.65849	High	High	High	High	High	Peak Found	High	High	High	High
High	Master Protein	Q91X97	Neurocalcin-delta OS=Mus musculus OX=10090 GN=Ncald PE=1 SV=4	194	9	Ncald	1.084	0.65849	High	High	High	High	High	High	High	High	High	High
High	Master Protein	P33175	Kinesin heavy chain isoform 5A OS=Mus musculus OX=10090 GN=Kif5a PE=1 SV=3	151	9	Kif5a	0.892	0.65849	High	High	High	High	High	High	High	High	High	High
High	Master Protein	Q9CQE3	28S ribosomal protein S17, mitochondrial OS=Mus musculus OX=10090 GN=Mrps17 PE=1 SV=1	17	3	Mrps17	1.173	0.658584	High	High	High	High	High	High	High	High	High	Peak Found
High	Master Protein	Q9WVA2	Mitochondrial import inner membrane translocase subunit Tim8 A OS=Mus musculus OX=10090 GN=Timm8a1 PE=1 SV=1	9	3	Timm8a1	0.802	0.658584	High	High	High	Peak Found	Peak Found	High	High	Peak Found	High	High
High	Master Protein	A0A494BA97	Osteoclast-stimulating factor 1 OS=Mus musculus OX=10090 GN=Ostf1 PE=1 SV=1	5	2	Ostf1	0.837	0.658815	Peak Found	Peak Found	High	High	Peak Found	Peak Found	High	Peak Found	High	High
High	Master Protein	Q9D338	39S ribosomal protein L19, mitochondrial OS=Mus musculus OX=10090 GN=Mrpl19 PE=1 SV=1	8	2	Mrpl19	0.785	0.658815	High	Peak Found	High	Peak Found	Peak Found	High	High	High	High	High
High	Master Protein	P60764	Ras-related C3 botulinum toxin substrate 3 OS=Mus musculus OX=10090 GN=Rac3 PE=1 SV=1	142	3	Rac3	0.873	0.658815	High	High	High	High	High	High	High	High	High	High
High	Master Protein	Q8VE95	UPF0598 protein C8orf82 homolog OS=Mus musculus OX=10090 PE=1 SV=1	18	5		1.168	0.658815	Peak Found	High	High	High	High	High	High	Peak Found	High	High
High	Master Protein	P70429	Ena/VASP-like protein OS=Mus musculus OX=10090 GN=Evl PE=1 SV=2	29	6	Evl	0.875	0.658815	High	High	High	High	High	High	High	High	High	High
High	Master Protein	A0A0R4J2B0	CUGBP Elav-like family member 2 OS=Mus musculus OX=10090 GN=Celf2 PE=1 SV=1	53	8	Celf2	0.879	0.658815	High	High	High	High	High	High	High	High	High	High
High	Master Protein	Q9EP89	Serine beta-lactamase-like protein LACTB, mitochondrial OS=Mus musculus OX=10090 GN=Lactb PE=1 SV=1	64	15	Lactb	1.075	0.658815	High	High	High	High	High	High	High	High	High	High
High	Master Protein	Q9DCT2	NADH dehydrogenase [ubiquinone] iron-sulfur protein 3, mitochondrial OS=Mus musculus OX=10090 GN=Ndufs3 PE=1 SV=2	263	17	Ndufs3	1.084	0.658815	High	High	High	High	High	High	High	High	High	High
High	Master Protein	Q62277	Synaptophysin OS=Mus musculus OX=10090 GN=Syp PE=1 SV=2	268	6	Syp	0.921	0.658837	High	High	High	High	High	High	High	High	High	High
High	Master Protein	P56391	Cytochrome c oxidase subunit 6B1 OS=Mus musculus OX=10090 GN=Cox6b1 PE=1 SV=2	247	10	Cox6b1	0.921	0.659666	High	High	High	High	High	High	High	High	High	High
High	Master Protein	Q9D880	Mitochondrial import inner membrane translocase subunit TIM50 OS=Mus musculus OX=10090 GN=Timm50 PE=1 SV=1	61	7	Timm50	1.075	0.659774	High	High	High	High	High	High	High	High	High	High
High	Master Protein	P17665	Cytochrome c oxidase subunit 7C, mitochondrial OS=Mus musculus OX=10090 GN=Cox7c PE=1 SV=1	25	2	Cox7c	1.121	0.660355	High	High	High	High	High	High	High	High	High	High
High	Master Protein	A0A0G2JF44	Intraflagellar transport protein 22 homolog (Fragment) OS=Mus musculus OX=10090 GN=Ift22 PE=1 SV=1	22	3	Ift22	1.165	0.660355	High	Peak Found	High	High	High	High	High	High	High	High
High	Master Protein	Q9WUT3	Ribosomal protein S6 kinase alpha-2 OS=Mus musculus OX=10090 GN=Rps6ka2 PE=1 SV=1	17	4	Rps6ka2	0.858	0.660355	High	Peak Found	Peak Found	High	High	High	High	High	Peak Found	High
High	Master Protein	Q9JLB2	MAGUK p55 subfamily member 5 OS=Mus musculus OX=10090 GN=Mpp5 PE=1 SV=1	26	8	Mpp5	1.085	0.660355	High	High	High	High	High	High	High	Peak Found	High	High
High	Master Protein	Q9Z2I2	Peptidyl-prolyl cis-trans isomerase FKBP1B OS=Mus musculus OX=10090 GN=Fkbp1b PE=1 SV=3	13	2	Fkbp1b	1.119	0.661833	High	High	High	High	High	High	High	High	High	High
High	Master Protein	Q8K2J0	1-phosphatidylinositol 4,5-bisphosphate phosphodiesterase delta-3 OS=Mus musculus OX=10090 GN=Plcd3 PE=1 SV=2	2	2	Plcd3	1.379	0.661833	Peak Found	High	Peak Found	Peak Found	Peak Found	Peak Found	High	Peak Found	Peak Found	Peak Found
High	Master Protein	Q4VAE3	Transmembrane protein 65 OS=Mus musculus OX=10090 GN=Tmem65 PE=1 SV=1	132	6	Tmem65	1.074	0.661833	High	High	High	High	High	High	High	High	High	High
High	Master Protein	Q99MK8	Beta-adrenergic receptor kinase 1 OS=Mus musculus OX=10090 GN=Grk2 PE=1 SV=2	138	15	Grk2	0.9	0.661833	High	High	High	High	High	High	High	High	High	High
High	Master Protein	Q60739	BAG family molecular chaperone regulator 1 OS=Mus musculus OX=10090 GN=Bag1 PE=1 SV=3	5	2	Bag1	0.805	0.662123	Peak Found	Peak Found	Peak Found	Peak Found	Peak Found	High	High	High	High	Peak Found
High	Master Protein	Q9QYR9	Acyl-coenzyme A thioesterase 2, mitochondrial OS=Mus musculus OX=10090 GN=Acot2 PE=1 SV=2	95	4	Acot2	1.084	0.662123	High	High	High	High	High	High	High	High	High	High
High	Master Protein	Q60668	Heterogeneous nuclear ribonucleoprotein D0 OS=Mus musculus OX=10090 GN=Hnrnpd PE=1 SV=2	39	3	Hnrnpd	0.883	0.662154	High	High	High	High	High	High	High	High	High	High
High	Master Protein	Q9QZ23	NFU1 iron-sulfur cluster scaffold homolog, mitochondrial OS=Mus musculus OX=10090 GN=Nfu1 PE=1 SV=2	52	7	Nfu1	1.097	0.663717	High	High	High	High	High	High	High	High	High	High
High	Master Protein	E9Q3B9	Monoglyceride lipase OS=Mus musculus OX=10090 GN=Mgll PE=1 SV=1	163	18	Mgll	0.911	0.663717	High	High	High	High	High	High	High	High	High	High
High	Master Protein	P48962	ADP/ATP translocase 1 OS=Mus musculus OX=10090 GN=Slc25a4 PE=1 SV=4	1249	14	Slc25a4	1.083	0.664293	High	High	High	High	High	High	High	High	High	High
High	Master Protein	E9Q705	BolA-like protein 3 OS=Mus musculus OX=10090 GN=Bola3 PE=1 SV=1	13	2	Bola3	1.334	0.664502	High	High	High	High	High	High	Peak Found	High	Peak Found	High
High	Master Protein	O70194	Eukaryotic translation initiation factor 3 subunit D OS=Mus musculus OX=10090 GN=Eif3d PE=1 SV=2	22	9	Eif3d	0.858	0.664502	High	High	High	High	High	High	High	High	High	High
High	Master Protein	P54822	Adenylosuccinate lyase OS=Mus musculus OX=10090 GN=Adsl PE=1 SV=2	47	11	Adsl	0.881	0.664502	High	High	High	High	High	High	High	High	High	High
High	Master Protein	A0A338P6I9	Uncharacterized protein OS=Mus musculus OX=10090 PE=4 SV=1	8	3		1.176	0.666067	Peak Found	High	High	Peak Found	High	High	High	Peak Found	High	Peak Found
High	Master Protein	P15388	Potassium voltage-gated channel subfamily C member 1 OS=Mus musculus OX=10090 GN=Kcnc1 PE=1 SV=1	8	4	Kcnc1	0.807	0.666285	High	High	Peak Found	Peak Found	Peak Found	High	Peak Found	High	High	Peak Found
High	Master Protein	Q9CYN9	Renin receptor OS=Mus musculus OX=10090 GN=Atp6ap2 PE=1 SV=2	24	5	Atp6ap2	0.879	0.666337	High	High	High	High	High	High	High	High	High	High
High	Master Protein	P62746	Rho-related GTP-binding protein RhoB OS=Mus musculus OX=10090 GN=Rhob PE=1 SV=1	192	9	Rhob	1.083	0.666337	High	High	High	High	High	High	High	High	High	High
High	Master Protein	Q9CYS6	Uncharacterized protein C2orf72 homolog OS=Mus musculus OX=10090 PE=1 SV=2	10	3		1.225	0.666949	Peak Found	High	High	High	High	Peak Found	High	High	High	Peak Found
High	Master Protein	Q99L13	3-hydroxyisobutyrate dehydrogenase, mitochondrial OS=Mus musculus OX=10090 GN=Hibadh PE=1 SV=1	180	15	Hibadh	1.075	0.667041	High	High	High	High	High	High	High	High	High	High
High	Master Protein	H7BX08	Calmodulin-regulated spectrin-associated protein 2 OS=Mus musculus OX=10090 GN=Camsap2 PE=1 SV=1	51	12	Camsap2	0.873	0.667653	High	High	High	High	High	High	High	High	High	High
High	Master Protein	Q9ET26	E3 ubiquitin-protein ligase RNF114 OS=Mus musculus OX=10090 GN=Rnf114 PE=1 SV=2	2	2	Rnf114	0.786	0.667832	Peak Found	Peak Found	Peak Found	Peak Found	High	Peak Found	High	Peak Found	Peak Found	Peak Found
High	Master Protein	Q91VK1	Basic leucine zipper and W2 domain-containing protein 2 OS=Mus musculus OX=10090 GN=Bzw2 PE=1 SV=1	2	2	Bzw2	0.758	0.667832	Peak Found	Peak Found	Peak Found	High	Peak Found	Peak Found	Peak Found	Peak Found	Peak Found	Peak Found
High	Master Protein	A0A2I3BQH8	Acyl-CoA-binding domain-containing protein 5 OS=Mus musculus OX=10090 GN=Acbd5 PE=1 SV=1	17	5	Acbd5	0.838	0.667832	High	High	High	High	High	High	High	High	High	High
High	Master Protein	Q99NB1	Acetyl-coenzyme A synthetase 2-like, mitochondrial OS=Mus musculus OX=10090 GN=Acss1 PE=1 SV=1	56	14	Acss1	1.111	0.667832	High	High	High	High	High	High	High	High	High	High
High	Master Protein	P24527	Leukotriene A-4 hydrolase OS=Mus musculus OX=10090 GN=Lta4h PE=1 SV=4	147	25	Lta4h	0.903	0.668235	High	High	High	High	High	High	High	High	High	High
High	Master Protein	O54946	DnaJ homolog subfamily B member 6 OS=Mus musculus OX=10090 GN=Dnajb6 PE=1 SV=4	19	2	Dnajb6	1.096	0.669351	High	High	High	High	High	High	High	High	High	High
High	Master Protein	O70251	Elongation factor 1-beta OS=Mus musculus OX=10090 GN=Eef1b PE=1 SV=5	131	9	Eef1b	0.915	0.670011	High	High	High	High	High	High	High	High	High	High
High	Master Protein	Q8BR63	Protein FAM177A1 OS=Mus musculus OX=10090 GN=Fam177a1 PE=1 SV=1	49	6	Fam177a1	1.098	0.671575	High	High	High	High	High	High	High	High	High	High
High	Master Protein	O88543	COP9 signalosome complex subunit 3 OS=Mus musculus OX=10090 GN=Cops3 PE=1 SV=3	125	14	Cops3	0.908	0.671575	High	High	High	High	High	High	High	High	High	High
High	Master Protein	P32067	Lupus La protein homolog OS=Mus musculus OX=10090 GN=Ssb PE=1 SV=1	13	5	Ssb	0.831	0.672347	High	High	Peak Found	High	High	High	High	High	High	High
High	Master Protein	F7B6K4	Inactive pantothenic acid kinase 4 (Fragment) OS=Mus musculus OX=10090 GN=Pank4 PE=1 SV=1	33	8	Pank4	0.879	0.673617	High	High	High	High	High	High	High	High	High	High
High	Master Protein	Q9DCB8	Iron-sulfur cluster assembly 2 homolog, mitochondrial OS=Mus musculus OX=10090 GN=Isca2 PE=1 SV=2	20	4	Isca2	1.151	0.673642	High	High	High	High	High	High	High	High	High	High
High	Master Protein	P50247	Adenosylhomocysteinase OS=Mus musculus OX=10090 GN=Ahcy PE=1 SV=3	131	17	Ahcy	0.906	0.673772	High	High	High	High	High	High	High	High	High	High
High	Master Protein	Q9WUL7	ADP-ribosylation factor-like protein 3 OS=Mus musculus OX=10090 GN=Arl3 PE=1 SV=1	91	9	Arl3	0.896	0.67607	High	High	High	High	High	High	High	High	High	High
High	Master Protein	P70408	Cadherin-10 OS=Mus musculus OX=10090 GN=Cdh10 PE=1 SV=3	55	7	Cdh10	1.092	0.679951	High	High	High	High	High	High	High	High	High	High
High	Master Protein	Q9JKY0	CCR4-NOT transcription complex subunit 9 OS=Mus musculus OX=10090 GN=Cnot9 PE=1 SV=1	11	4	Cnot9	0.848	0.680154	High	Peak Found	High	High	High	Peak Found	High	High	Peak Found	Peak Found
High	Master Protein	Q63844	Mitogen-activated protein kinase 3 OS=Mus musculus OX=10090 GN=Mapk3 PE=1 SV=5	184	12	Mapk3	0.906	0.680168	High	High	High	High	High	High	High	High	High	High
High	Master Protein	P48771	Cytochrome c oxidase subunit 7A2, mitochondrial OS=Mus musculus OX=10090 GN=Cox7a2 PE=1 SV=2	58	2	Cox7a2	0.921	0.682557	High	High	High	High	High	High	High	High	High	High
High	Master Protein	Q9DBH5	Vesicular integral-membrane protein VIP36 OS=Mus musculus OX=10090 GN=Lman2 PE=1 SV=2	33	9	Lman2	0.874	0.683288	High	High	High	High	High	High	High	High	High	High
High	Master Protein	Q3TZZ7	Extended synaptotagmin-2 OS=Mus musculus OX=10090 GN=Esyt2 PE=1 SV=1	27	7	Esyt2	1.138	0.683563	High	High	High	High	High	High	High	High	High	High
High	Master Protein	Q9JHW2	Omega-amidase NIT2 OS=Mus musculus OX=10090 GN=Nit2 PE=1 SV=1	72	13	Nit2	1.098	0.683563	High	High	High	High	High	High	High	High	High	High
High	Master Protein	Z4YJW0	ER membrane protein complex subunit 1 OS=Mus musculus OX=10090 GN=Emc1 PE=1 SV=1	64	14	Emc1	1.094	0.683563	High	High	High	High	High	High	High	High	High	High
High	Master Protein	Q8C483	Seryl-tRNA synthetase OS=Mus musculus OX=10090 GN=Sars PE=1 SV=1	222	22	Sars	0.914	0.683563	High	High	High	High	High	High	High	High	High	High
High	Master Protein	Q91ZP9	N-terminal EF-hand calcium-binding protein 2 OS=Mus musculus OX=10090 GN=Necab2 PE=1 SV=1	96	14	Necab2	0.883	0.683744	High	High	High	High	High	High	High	High	High	High
High	Master Protein	Q9DBX3	Sushi domain-containing protein 2 OS=Mus musculus OX=10090 GN=Susd2 PE=1 SV=1	6	3	Susd2	1.218	0.684336	High	High	Peak Found	Peak Found	High	Peak Found	High	High	High	Peak Found
High	Master Protein	S4R1C4	Calcium-transporting ATPase OS=Mus musculus OX=10090 GN=Atp2b2 PE=1 SV=1	1094	3	Atp2b2	1.161	0.685454	High	High	High	High	High	High	High	High	High	High
High	Master Protein	Q99JI6	Ras-related protein Rap-1b OS=Mus musculus OX=10090 GN=Rap1b PE=1 SV=2	195	5	Rap1b	0.904	0.685454	High	High	High	High	High	High	High	High	High	High
High	Master Protein	D3Z6I8	Tropomyosin alpha-3 chain OS=Mus musculus OX=10090 GN=Tpm3 PE=1 SV=1	248	2	Tpm3	1.081	0.688265	High	High	High	High	High	High	High	High	High	High
High	Master Protein	Q99J47	Dehydrogenase/reductase SDR family member 7B OS=Mus musculus OX=10090 GN=Dhrs7b PE=1 SV=1	33	6	Dhrs7b	1.114	0.68874	High	High	High	High	High	High	High	High	High	High
High	Master Protein	Q8C878	NEDD8-activating enzyme E1 catalytic subunit OS=Mus musculus OX=10090 GN=Uba3 PE=1 SV=2	72	10	Uba3	0.883	0.68874	High	High	High	High	High	High	High	High	High	High
High	Master Protein	P34022	Ran-specific GTPase-activating protein OS=Mus musculus OX=10090 GN=Ranbp1 PE=1 SV=2	80	7	Ranbp1	0.911	0.690194	High	High	High	High	High	High	High	High	High	High
High	Master Protein	Q920A5	Retinoid-inducible serine carboxypeptidase OS=Mus musculus OX=10090 GN=Scpep1 PE=1 SV=2	13	4	Scpep1	1.181	0.691008	High	High	High	High	High	Peak Found	High	Peak Found	High	Peak Found
High	Master Protein	G3X8T3	Carboxypeptidase OS=Mus musculus OX=10090 GN=Ctsa PE=1 SV=1	29	6	Ctsa	0.88	0.691008	High	High	High	High	High	High	High	High	High	High
High	Master Protein	Q9R0Q9	Mannose-P-dolichol utilization defect 1 protein OS=Mus musculus OX=10090 GN=Mpdu1 PE=1 SV=1	30	3	Mpdu1	0.868	0.691974	High	High	High	High	High	High	High	High	High	High
High	Master Protein	Q9CQN7	39S ribosomal protein L41, mitochondrial OS=Mus musculus OX=10090 GN=Mrpl41 PE=1 SV=1	29	4	Mrpl41	1.143	0.691978	High	High	High	High	High	Peak Found	High	High	High	High
High	Master Protein	Q66GT5	Phosphatidylglycerophosphatase and protein-tyrosine phosphatase 1 OS=Mus musculus OX=10090 GN=Ptpmt1 PE=1 SV=1	14	4	Ptpmt1	1.166	0.692809	High	High	High	High	High	High	High	High	High	Peak Found
High	Master Protein	Q8K2L8	Trafficking protein particle complex subunit 12 OS=Mus musculus OX=10090 GN=Trappc12 PE=1 SV=2	25	10	Trappc12	1.114	0.692809	High	High	High	High	High	High	High	High	High	High
High	Master Protein	Q924C1	Exportin-5 OS=Mus musculus OX=10090 GN=Xpo5 PE=1 SV=1	14	8	Xpo5	1.071	0.694052	High	High	High	Peak Found	Peak Found	High	High	Peak Found	High	High
High	Master Protein	Q6NS52	Diacylglycerol kinase beta OS=Mus musculus OX=10090 GN=Dgkb PE=1 SV=2	152	25	Dgkb	0.905	0.694052	High	High	High	High	High	High	High	High	High	High
High	Master Protein	Q6NSR8	Probable aminopeptidase NPEPL1 OS=Mus musculus OX=10090 GN=Npepl1 PE=1 SV=1	14	5	Npepl1	1.112	0.695089	High	High	High	High	High	High	High	High	High	High
High	Master Protein	Q9QUN9	Dickkopf-related protein 3 OS=Mus musculus OX=10090 GN=Dkk3 PE=2 SV=1	3	2	Dkk3	0.844	0.695249	High	Peak Found	Peak Found	Peak Found	Peak Found	High	Peak Found	Peak Found	Peak Found	Peak Found
High	Master Protein	Q9JI19	Acidic fibroblast growth factor intracellular-binding protein OS=Mus musculus OX=10090 GN=Fibp PE=1 SV=1	23	8	Fibp	1.075	0.695249	High	High	High	Peak Found	High	High	High	High	High	High
High	Master Protein	Q61239	Protein farnesyltransferase/geranylgeranyltransferase type-1 subunit alpha OS=Mus musculus OX=10090 GN=Fnta PE=1 SV=1	11	3	Fnta	1.206	0.695327	Peak Found	Peak Found	High	High	High	High	Peak Found	Peak Found	High	High
High	Master Protein	O89084	cAMP-specific 3',5'-cyclic phosphodiesterase 4A OS=Mus musculus OX=10090 GN=Pde4a PE=1 SV=2	90	11	Pde4a	1.075	0.696742	High	High	High	High	High	High	High	High	High	High
High	Master Protein	Q8BX10	Serine/threonine-protein phosphatase PGAM5, mitochondrial OS=Mus musculus OX=10090 GN=Pgam5 PE=1 SV=1	69	10	Pgam5	0.88	0.696758	High	High	High	High	High	High	High	High	High	High
High	Master Protein	Q3UXZ6	Protein FAM81A OS=Mus musculus OX=10090 GN=Fam81a PE=1 SV=2	72	11	Fam81a	1.087	0.696885	High	High	High	High	High	High	High	High	High	High
High	Master Protein	Q99LD8	N(G),N(G)-dimethylarginine dimethylaminohydrolase 2 OS=Mus musculus OX=10090 GN=Ddah2 PE=1 SV=1	44	5	Ddah2	0.882	0.698365	High	High	High	High	High	High	High	High	High	High
High	Master Protein	P47738	Aldehyde dehydrogenase, mitochondrial OS=Mus musculus OX=10090 GN=Aldh2 PE=1 SV=1	334	26	Aldh2	1.08	0.698365	High	High	High	High	High	High	High	High	High	High
High	Master Protein	P56812	Programmed cell death protein 5 OS=Mus musculus OX=10090 GN=Pdcd5 PE=1 SV=3	58	5	Pdcd5	1.08	0.69846	High	High	High	High	High	High	High	High	High	High
High	Master Protein	Q9WVJ2	26S proteasome non-ATPase regulatory subunit 13 OS=Mus musculus OX=10090 GN=Psmd13 PE=1 SV=1	77	15	Psmd13	0.889	0.69964	High	High	High	High	High	High	High	High	High	High
High	Master Protein	P70303	CTP synthase 2 OS=Mus musculus OX=10090 GN=Ctps2 PE=1 SV=1	9	4	Ctps2	0.811	0.699852	Peak Found	Peak Found	Peak Found	Peak Found	High	High	High	Peak Found	High	High
High	Master Protein	Q8BWS5	G protein-regulated inducer of neurite outgrowth 3 OS=Mus musculus OX=10090 GN=Gprin3 PE=1 SV=1	56	15	Gprin3	1.111	0.7002	High	High	High	High	High	High	High	High	High	High
High	Master Protein	Q5DU31	Interactor protein for cytohesin exchange factors 1 OS=Mus musculus OX=10090 GN=Ipcef1 PE=1 SV=2	15	3	Ipcef1	1.158	0.702969	High	High	High	High	High	High	High	High	High	High
High	Master Protein	Q8K0D5	Elongation factor G, mitochondrial OS=Mus musculus OX=10090 GN=Gfm1 PE=1 SV=1	90	16	Gfm1	1.087	0.703712	High	High	High	High	High	High	High	High	High	High
High	Master Protein	Q8VDN2	Sodium/potassium-transporting ATPase subunit alpha-1 OS=Mus musculus OX=10090 GN=Atp1a1 PE=1 SV=1	3009	36	Atp1a1	1.079	0.703712	High	High	High	High	High	High	High	High	High	High
High	Master Protein	Q91ZZ3	Beta-synuclein OS=Mus musculus OX=10090 GN=Sncb PE=1 SV=1	197	2	Sncb	1.079	0.703958	High	High	High	High	High	High	High	High	High	High
High	Master Protein	Q9D7J4	Cytochrome c oxidase assembly protein COX20, mitochondrial OS=Mus musculus OX=10090 GN=Cox20 PE=1 SV=1	10	3	Cox20	1.16	0.704196	High	High	High	High	High	High	Peak Found	Peak Found	High	High
High	Master Protein	A2AJ23	Neural proliferation differentiation and control protein 1 (Fragment) OS=Mus musculus OX=10090 GN=Npdc1 PE=1 SV=1	9	3	Npdc1	0.806	0.704588	High	Peak Found	Peak Found	Peak Found	High	High	High	High	Peak Found	High
High	Master Protein	E9Q5E1	Protocadherin-19 OS=Mus musculus OX=10090 GN=Pcdh19 PE=1 SV=1	5	4	Pcdh19	1.218	0.704588	Peak Found	Peak Found	High	Peak Found	High	High	Peak Found	Peak Found	Peak Found	Peak Found
High	Master Protein	E9QMK9	D-glutamate cyclase, mitochondrial OS=Mus musculus OX=10090 GN=Dglucy PE=1 SV=1	12	4	Dglucy	1.163	0.70477	High	Peak Found	Peak Found	High	High	High	High	High	High	High
High	Master Protein	P97450	ATP synthase-coupling factor 6, mitochondrial OS=Mus musculus OX=10090 GN=Atp5pf PE=1 SV=1	134	8	Atp5pf	1.08	0.70477	High	High	High	High	High	High	High	High	High	High
High	Master Protein	P50396	Rab GDP dissociation inhibitor alpha OS=Mus musculus OX=10090 GN=Gdi1 PE=1 SV=3	790	33	Gdi1	0.925	0.704799	High	High	High	High	High	High	High	High	High	High
High	Master Protein	Q9WVE8	Protein kinase C and casein kinase substrate in neurons protein 2 OS=Mus musculus OX=10090 GN=Pacsin2 PE=1 SV=1	128	11	Pacsin2	0.906	0.705639	High	High	High	High	High	High	High	High	High	High
High	Master Protein	P63038	60 kDa heat shock protein, mitochondrial OS=Mus musculus OX=10090 GN=Hspd1 PE=1 SV=1	1237	42	Hspd1	1.079	0.705639	High	High	High	High	High	High	High	High	High	High
High	Master Protein	Q91V76	Ester hydrolase C11orf54 homolog OS=Mus musculus OX=10090 PE=1 SV=1	65	12		0.885	0.705737	High	High	High	High	High	High	High	High	High	High
High	Master Protein	O88444	Adenylate cyclase type 1 OS=Mus musculus OX=10090 GN=Adcy1 PE=1 SV=2	35	5	Adcy1	1.111	0.705959	High	High	High	High	High	High	High	High	High	High
High	Master Protein	O09111	NADH dehydrogenase [ubiquinone] 1 beta subcomplex subunit 11, mitochondrial OS=Mus musculus OX=10090 GN=Ndufb11 PE=1 SV=2	100	6	Ndufb11	0.916	0.706032	High	High	High	High	High	High	High	High	High	High
High	Master Protein	Q8VBX6	Multiple PDZ domain protein OS=Mus musculus OX=10090 GN=Mpdz PE=1 SV=2	10	7	Mpdz	1.197	0.706032	Peak Found	High	High	High	Peak Found	High	High	Peak Found	High	High
High	Master Protein	Q8BGD8	Cytochrome c oxidase assembly factor 6 homolog OS=Mus musculus OX=10090 GN=Coa6 PE=1 SV=1	36	3	Coa6	1.109	0.707629	High	High	High	High	High	High	High	High	High	High
High	Master Protein	Q8VCT3	Aminopeptidase B OS=Mus musculus OX=10090 GN=Rnpep PE=1 SV=2	98	17	Rnpep	0.899	0.707629	High	High	High	High	High	High	High	High	High	High
High	Master Protein	Q3UMG6	Nucleoside diphosphate kinase 7 OS=Mus musculus OX=10090 GN=Nme7 PE=1 SV=1	5	2	Nme7	1.201	0.708895	Peak Found	High	High	High	Peak Found	Peak Found	Peak Found	Peak Found	Peak Found	High
High	Master Protein	B1ASP2	Tyrosine-protein kinase OS=Mus musculus OX=10090 GN=Jak1 PE=1 SV=1	6	4	Jak1	1.216	0.708895	High	Peak Found	Peak Found	High	High	High	Peak Found	High	Peak Found	High
High	Master Protein	Q8K1S1	Leucine-rich repeat LGI family member 4 OS=Mus musculus OX=10090 GN=Lgi4 PE=1 SV=1	11	4	Lgi4	1.109	0.708895	High	High	High	Peak Found	Peak Found	High	High	High	High	High
High	Master Protein	Q8BGZ1	Hippocalcin-like protein 4 OS=Mus musculus OX=10090 GN=Hpcal4 PE=1 SV=3	257	13	Hpcal4	0.926	0.708895	High	High	High	High	High	High	High	High	High	High
High	Master Protein	Q8BVG8	N-acetyltransferase 14 OS=Mus musculus OX=10090 GN=Nat14 PE=1 SV=1	17	3	Nat14	1.19	0.708963	High	High	High	High	High	High	High	High	High	High
High	Master Protein	Q9CY58	Plasminogen activator inhibitor 1 RNA-binding protein OS=Mus musculus OX=10090 GN=Serbp1 PE=1 SV=2	47	8	Serbp1	0.884	0.709174	High	High	High	High	High	High	High	High	High	High
High	Master Protein	Q8VCI5	Peroxisomal biogenesis factor 19 OS=Mus musculus OX=10090 GN=Pex19 PE=1 SV=1	29	4	Pex19	0.817	0.709726	High	High	High	High	High	High	High	High	High	High
High	Master Protein	O08807	Peroxiredoxin-4 OS=Mus musculus OX=10090 GN=Prdx4 PE=1 SV=1	89	5	Prdx4	1.108	0.709726	High	High	High	High	High	High	High	High	High	High
High	Master Protein	Q9R0P9	Ubiquitin carboxyl-terminal hydrolase isozyme L1 OS=Mus musculus OX=10090 GN=Uchl1 PE=1 SV=1	379	15	Uchl1	0.926	0.709726	High	High	High	High	High	High	High	High	High	High
High	Master Protein	Q8JZN7	Mitochondrial Rho GTPase 2 OS=Mus musculus OX=10090 GN=Rhot2 PE=1 SV=1	66	9	Rhot2	1.117	0.710151	High	High	High	High	High	High	High	High	High	High
High	Master Protein	P55288	Cadherin-11 OS=Mus musculus OX=10090 GN=Cdh11 PE=1 SV=1	36	6	Cdh11	1.11	0.712202	High	High	High	High	High	High	High	High	High	High
High	Master Protein	P62075	Mitochondrial import inner membrane translocase subunit Tim13 OS=Mus musculus OX=10090 GN=Timm13 PE=1 SV=1	56	6	Timm13	1.072	0.712202	High	High	High	High	High	High	High	High	High	High
High	Master Protein	Q9R0P5	Destrin OS=Mus musculus OX=10090 GN=Dstn PE=1 SV=3	150	11	Dstn	0.919	0.712202	High	High	High	High	High	High	High	High	High	High
High	Master Protein	A0A1D5RL96	BTB/POZ domain-containing protein 8 OS=Mus musculus OX=10090 GN=Btbd8 PE=1 SV=1	205	16	Btbd8	1.081	0.712452	High	High	High	High	High	High	High	High	High	High
High	Master Protein	Q71M36	Chondroitin sulfate proteoglycan 5 OS=Mus musculus OX=10090 GN=Cspg5 PE=1 SV=2	190	13	Cspg5	0.916	0.715408	High	High	High	High	High	High	High	High	High	High
High	Master Protein	Q80XN0	D-beta-hydroxybutyrate dehydrogenase, mitochondrial OS=Mus musculus OX=10090 GN=Bdh1 PE=1 SV=2	225	16	Bdh1	1.078	0.715408	High	High	High	High	High	High	High	High	High	High
High	Master Protein	O08547	Vesicle-trafficking protein SEC22b OS=Mus musculus OX=10090 GN=Sec22b PE=1 SV=3	89	11	Sec22b	0.902	0.715416	High	High	High	High	High	High	High	High	High	High
High	Master Protein	O35239	Tyrosine-protein phosphatase non-receptor type 9 OS=Mus musculus OX=10090 GN=Ptpn9 PE=1 SV=2	82	13	Ptpn9	0.885	0.716148	High	High	High	High	High	High	High	High	High	High
High	Master Protein	Q9JHR7	Insulin-degrading enzyme OS=Mus musculus OX=10090 GN=Ide PE=1 SV=1	147	25	Ide	0.906	0.716641	High	High	High	High	High	High	High	High	High	High
High	Master Protein	Q9D7M1	Glucose-induced degradation protein 8 homolog OS=Mus musculus OX=10090 GN=Gid8 PE=1 SV=1	2	2	Gid8	0.74	0.717285	Peak Found	Peak Found	Peak Found	Peak Found	High	Peak Found	Peak Found	Peak Found	Peak Found	High
High	Master Protein	A3KMP2	Tetratricopeptide repeat protein 38 OS=Mus musculus OX=10090 GN=Ttc38 PE=1 SV=2	4	2	Ttc38	1.266	0.717596	Peak Found	Peak Found	Peak Found	High	Peak Found	High	High	Peak Found	Peak Found	High
High	Master Protein	Q64314	Hematopoietic progenitor cell antigen CD34 OS=Mus musculus OX=10090 GN=Cd34 PE=1 SV=1	52	5	Cd34	1.086	0.717688	High	High	High	High	High	High	High	High	High	High
High	Master Protein	Q6PDI5	Proteasome adapter and scaffold protein ECM29 OS=Mus musculus OX=10090 GN=Ecpas PE=1 SV=3	58	19	Ecpas	0.881	0.717688	High	High	High	High	High	High	High	High	High	High
High	Master Protein	G5E823	Histidine--tRNA ligase OS=Mus musculus OX=10090 GN=Hars2 PE=1 SV=1	23	3	Hars2	1.153	0.718714	High	Peak Found	Peak Found	Peak Found	High	Peak Found	High	High	Peak Found	High
High	Master Protein	Q8C0Y0	Serine/threonine-protein phosphatase 4 regulatory subunit 4 OS=Mus musculus OX=10090 GN=Ppp4r4 PE=1 SV=2	8	5	Ppp4r4	0.884	0.719482	Peak Found	Peak Found	Peak Found	Peak Found	High	High	High	Peak Found	High	High
High	Master Protein	Q9CRD0	OCIA domain-containing protein 1 OS=Mus musculus OX=10090 GN=Ociad1 PE=1 SV=1	100	7	Ociad1	1.069	0.719482	High	High	High	High	High	High	High	High	High	High
High	Master Protein	Q7TSI3	Serine/threonine-protein phosphatase 6 regulatory subunit 1 OS=Mus musculus OX=10090 GN=Ppp6r1 PE=1 SV=1	27	11	Ppp6r1	0.869	0.719482	High	High	High	High	High	High	High	High	High	High
High	Master Protein	P10639	Thioredoxin OS=Mus musculus OX=10090 GN=Txn PE=1 SV=3	138	5	Txn	1.075	0.719613	High	High	High	High	High	High	High	High	High	High
High	Master Protein	Q9D1B9	39S ribosomal protein L28, mitochondrial OS=Mus musculus OX=10090 GN=Mrpl28 PE=1 SV=3	15	3	Mrpl28	1.158	0.721237	High	High	High	High	High	High	High	High	High	High
High	Master Protein	A0A5F8MQ25	Serine/threonine-protein phosphatase 6 regulatory subunit 2 OS=Mus musculus OX=10090 GN=Ppp6r2 PE=1 SV=1	87	15	Ppp6r2	0.89	0.721237	High	High	High	High	High	High	High	High	High	High
High	Master Protein	P70670	Nascent polypeptide-associated complex subunit alpha, muscle-specific form OS=Mus musculus OX=10090 GN=Naca PE=1 SV=2	36	5	Naca	0.886	0.722095	High	High	High	High	High	High	High	High	High	High
High	Master Protein	Q9D1E6	Tubulin-folding cofactor B OS=Mus musculus OX=10090 GN=Tbcb PE=1 SV=2	70	10	Tbcb	0.888	0.723929	High	High	High	High	High	High	High	High	High	High
High	Master Protein	Q5M8N4	Epimerase family protein SDR39U1 OS=Mus musculus OX=10090 GN=Sdr39u1 PE=1 SV=2	71	12	Sdr39u1	1.086	0.723929	High	High	High	High	High	High	High	High	High	High
High	Master Protein	Q9DD18	D-aminoacyl-tRNA deacylase 1 OS=Mus musculus OX=10090 GN=Dtd1 PE=1 SV=2	21	4	Dtd1	0.888	0.724066	High	High	High	High	High	High	High	High	High	High
High	Master Protein	Q9D172	Glutamine amidotransferase-like class 1 domain-containing protein 3A, mitochondrial OS=Mus musculus OX=10090 GN=Gatd3a PE=1 SV=1	263	11	Gatd3a	1.077	0.724151	High	High	High	High	High	High	High	High	High	High
High	Master Protein	Q02105	Complement C1q subcomponent subunit C OS=Mus musculus OX=10090 GN=C1qc PE=1 SV=2	20	4	C1qc	0.883	0.725108	High	High	High	High	High	High	High	High	High	High
High	Master Protein	Q9DAZ9	Abscission/NoCut checkpoint regulator OS=Mus musculus OX=10090 GN=Zfyve19 PE=1 SV=2	5	3	Zfyve19	1.206	0.72621	High	Peak Found	Peak Found	Peak Found	Peak Found	High	High	High	Peak Found	Peak Found
High	Master Protein	Q8BGU5	Cyclin-Y OS=Mus musculus OX=10090 GN=Ccny PE=1 SV=1	61	4	Ccny	1.073	0.72621	High	High	High	High	High	High	High	High	High	High
High	Master Protein	Q9D6F4	Gamma-aminobutyric acid receptor subunit alpha-4 OS=Mus musculus OX=10090 GN=Gabra4 PE=2 SV=1	13	4	Gabra4	1.155	0.72621	High	High	Peak Found	High	High	High	High	High	High	High
High	Master Protein	Q9CY16	28S ribosomal protein S28, mitochondrial OS=Mus musculus OX=10090 GN=Mrps28 PE=1 SV=1	16	5	Mrps28	1.151	0.72621	High	High	High	High	High	High	Peak Found	High	High	High
High	Master Protein	Q9DBB8	Trans-1,2-dihydrobenzene-1,2-diol dehydrogenase OS=Mus musculus OX=10090 GN=Dhdh PE=1 SV=1	14	6	Dhdh	0.868	0.72621	High	Peak Found	High	Peak Found	Peak Found	High	High	High	High	High
High	Master Protein	Q5DTX6	Junctional protein associated with coronary artery disease OS=Mus musculus OX=10090 GN=Jcad PE=1 SV=2	12	8	Jcad	1.21	0.72621	High	High	High	High	Peak Found	Peak Found	High	High	Peak Found	Peak Found
High	Master Protein	P58021	Transmembrane 9 superfamily member 2 OS=Mus musculus OX=10090 GN=Tm9sf2 PE=1 SV=1	26	5	Tm9sf2	0.884	0.726236	High	High	High	High	High	High	High	High	High	High
High	Master Protein	Q69Z26	Contactin-4 OS=Mus musculus OX=10090 GN=Cntn4 PE=1 SV=2	53	8	Cntn4	1.091	0.726458	High	High	High	High	High	High	High	High	High	High
High	Master Protein	Q80U04	E3 ubiquitin-protein ligase Praja-2 OS=Mus musculus OX=10090 GN=Pja2 PE=1 SV=2	18	3	Pja2	0.885	0.726933	High	High	High	High	High	High	High	High	Peak Found	High
High	Master Protein	P60521	Gamma-aminobutyric acid receptor-associated protein-like 2 OS=Mus musculus OX=10090 GN=Gabarapl2 PE=1 SV=1	78	4	Gabarapl2	1.087	0.726933	High	High	High	High	High	High	High	High	High	High
High	Master Protein	E9PYG6	RAS p21 protein activator 1 OS=Mus musculus OX=10090 GN=Rasa1 PE=1 SV=1	51	14	Rasa1	0.881	0.726933	High	High	High	High	High	High	High	High	High	High
High	Master Protein	Q9CQD4	Charged multivesicular body protein 1b-2 OS=Mus musculus OX=10090 GN=Chmp1b2 PE=2 SV=2	4	2	Chmp1b2	0.806	0.727106	Peak Found	Peak Found	Not Found	Peak Found	Peak Found	High	High	Peak Found	High	High
High	Master Protein	P70441	Na(+)/H(+) exchange regulatory cofactor NHE-RF1 OS=Mus musculus OX=10090 GN=Slc9a3r1 PE=1 SV=3	204	26	Slc9a3r1	0.921	0.727182	High	High	High	High	High	High	High	High	High	High
High	Master Protein	Q3UTJ2	Sorbin and SH3 domain-containing protein 2 OS=Mus musculus OX=10090 GN=Sorbs2 PE=1 SV=2	242	5	Sorbs2	1.065	0.728846	High	High	High	Peak Found	High	High	Peak Found	Peak Found	Peak Found	Peak Found
High	Master Protein	Q9CQE1	Protein NipSnap homolog 3B OS=Mus musculus OX=10090 GN=Nipsnap3b PE=1 SV=1	18	5	Nipsnap3b	1.111	0.728846	High	High	High	High	High	High	Peak Found	High	Peak Found	High
High	Master Protein	P63280	SUMO-conjugating enzyme UBC9 OS=Mus musculus OX=10090 GN=Ube2i PE=1 SV=1	31	6	Ube2i	0.884	0.728846	High	High	High	High	High	High	High	High	High	High
High	Master Protein	Q8C0L0	Thioredoxin-related transmembrane protein 4 OS=Mus musculus OX=10090 GN=Tmx4 PE=1 SV=2	66	7	Tmx4	1.078	0.728846	High	High	High	High	High	High	High	High	High	High
High	Master Protein	A0A0R4J0I9	Prolow-density lipoprotein receptor-related protein 1 OS=Mus musculus OX=10090 GN=Lrp1 PE=1 SV=1	568	87	Lrp1	0.926	0.728846	High	High	High	High	High	High	High	High	High	High
High	Master Protein	Q9Z0E0	Neurochondrin OS=Mus musculus OX=10090 GN=Ncdn PE=1 SV=1	384	33	Ncdn	0.928	0.728861	High	High	High	High	High	High	High	High	High	High
High	Master Protein	Q5RJH6	Protein SMG7 OS=Mus musculus OX=10090 GN=Smg7 PE=2 SV=1	4	3	Smg7	0.786	0.728885	Peak Found	High	Peak Found	Peak Found	Peak Found	High	High	Peak Found	Peak Found	High
High	Master Protein	Q8VEK3	Heterogeneous nuclear ribonucleoprotein U OS=Mus musculus OX=10090 GN=Hnrnpu PE=1 SV=1	102	16	Hnrnpu	0.897	0.729149	High	High	High	High	High	High	High	High	High	High
High	Master Protein	Q9JKF7	39S ribosomal protein L39, mitochondrial OS=Mus musculus OX=10090 GN=Mrpl39 PE=1 SV=4	11	2	Mrpl39	1.222	0.730455	High	High	High	High	High	High	Peak Found	High	High	High
High	Master Protein	Q91X96	Guanine nucleotide exchange factor MSS4 OS=Mus musculus OX=10090 GN=Rabif PE=1 SV=1	19	3	Rabif	0.879	0.730455	High	High	High	High	High	High	High	High	High	High
High	Master Protein	Q91YW3	DnaJ homolog subfamily C member 3 OS=Mus musculus OX=10090 GN=Dnajc3 PE=1 SV=1	12	3	Dnajc3	0.856	0.730657	High	High	Peak Found	High	High	Peak Found	High	High	Peak Found	High
High	Master Protein	D3Z396	Neurotrimin OS=Mus musculus OX=10090 GN=Ntm PE=1 SV=1	234	6	Ntm	1.076	0.730902	High	High	High	High	High	High	High	High	High	High
High	Master Protein	P55144	Tyrosine-protein kinase receptor TYRO3 OS=Mus musculus OX=10090 GN=Tyro3 PE=1 SV=2	10	5	Tyro3	0.823	0.731291	High	Peak Found	Peak Found	High	Peak Found	High	High	High	High	High
High	Master Protein	Q78J03	Methionine-R-sulfoxide reductase B2, mitochondrial OS=Mus musculus OX=10090 GN=Msrb2 PE=1 SV=1	47	10	Msrb2	1.08	0.731291	High	High	High	High	High	High	High	High	High	High
High	Master Protein	Q9JMC3	DnaJ homolog subfamily A member 4 OS=Mus musculus OX=10090 GN=Dnaja4 PE=1 SV=1	45	10	Dnaja4	0.889	0.734497	High	High	High	High	High	High	High	High	High	High
High	Master Protein	P47754	F-actin-capping protein subunit alpha-2 OS=Mus musculus OX=10090 GN=Capza2 PE=1 SV=3	208	11	Capza2	0.928	0.734497	High	High	High	High	High	High	High	High	High	High
High	Master Protein	Q64442	Sorbitol dehydrogenase OS=Mus musculus OX=10090 GN=Sord PE=1 SV=3	29	5	Sord	1.118	0.73522	High	High	High	High	High	Peak Found	High	High	High	High
High	Master Protein	Q9QZD9	Eukaryotic translation initiation factor 3 subunit I OS=Mus musculus OX=10090 GN=Eif3i PE=1 SV=1	34	6	Eif3i	0.886	0.736799	High	High	High	High	High	High	High	High	High	High
High	Master Protein	Q8CGC4	Protein LSM14 homolog B OS=Mus musculus OX=10090 GN=Lsm14b PE=1 SV=3	3	2	Lsm14b	0.805	0.737165	Peak Found	Peak Found	High	Peak Found	Not Found	Peak Found	High	Peak Found	Peak Found	Peak Found
High	Master Protein	Q8R4V2	Dual specificity protein phosphatase 15 OS=Mus musculus OX=10090 GN=Dusp15 PE=1 SV=3	5	3	Dusp15	1.282	0.737165	Peak Found	High	High	High	High	Peak Found	High	Peak Found	Peak Found	Peak Found
High	Master Protein	Q8BGG7	Ubiquitin-associated and SH3 domain-containing protein B OS=Mus musculus OX=10090 GN=Ubash3b PE=1 SV=1	11	7	Ubash3b	0.848	0.737165	High	Peak Found	Peak Found	High	High	High	High	High	High	High
High	Master Protein	Q9D4F2	Phospholipid phosphatase 6 OS=Mus musculus OX=10090 GN=Plpp6 PE=1 SV=1	5	3	Plpp6	0.825	0.738573	Peak Found	Peak Found	Peak Found	High	Peak Found	High	Peak Found	High	High	Peak Found
High	Master Protein	Q8BGV0	Probable asparagine--tRNA ligase, mitochondrial OS=Mus musculus OX=10090 GN=Nars2 PE=1 SV=1	9	5	Nars2	1.176	0.738573	High	Peak Found	High	High	High	Peak Found	Peak Found	High	Peak Found	High
High	Master Protein	Q91W97	Hexokinase HKDC1 OS=Mus musculus OX=10090 GN=Hkdc1 PE=2 SV=1	111	2	Hkdc1	1.174	0.740139	High	High	High	Peak Found	High	High	Peak Found	Not Found	Peak Found	High
High	Master Protein	Q9DB20	ATP synthase subunit O, mitochondrial OS=Mus musculus OX=10090 GN=Atp5po PE=1 SV=1	242	11	Atp5po	1.075	0.740982	High	High	High	High	High	High	High	High	High	High
High	Master Protein	Q93092	Transaldolase OS=Mus musculus OX=10090 GN=Taldo1 PE=1 SV=2	105	14	Taldo1	0.929	0.741009	High	High	High	High	High	High	High	High	High	High
High	Master Protein	Q8BGT5	Alanine aminotransferase 2 OS=Mus musculus OX=10090 GN=Gpt2 PE=1 SV=1	9	3	Gpt2	1.197	0.741067	Peak Found	Peak Found	Peak Found	Peak Found	Peak Found	High	High	High	High	High
High	Master Protein	E9PX29	Spectrin beta chain OS=Mus musculus OX=10090 GN=Sptbn4 PE=1 SV=1	221	38	Sptbn4	1.07	0.741067	High	High	High	High	High	High	High	High	High	High
High	Master Protein	Q8R4U7	Leucine zipper protein 1 OS=Mus musculus OX=10090 GN=Luzp1 PE=1 SV=2	34	13	Luzp1	1.144	0.743042	High	High	High	High	High	High	High	High	High	High
High	Master Protein	Q8C739	Protein FAM110B OS=Mus musculus OX=10090 GN=Fam110b PE=1 SV=1	3	2	Fam110b	0.794	0.744279	Peak Found	Peak Found	Peak Found	Peak Found	Peak Found	High	High	Peak Found	Peak Found	Peak Found
High	Master Protein	Q9ET22	Dipeptidyl peptidase 2 OS=Mus musculus OX=10090 GN=Dpp7 PE=1 SV=2	12	3	Dpp7	1.165	0.744279	High	High	High	High	High	High	High	High	High	High
High	Master Protein	Q8C6B0	Methyltransferase-like 7A1 OS=Mus musculus OX=10090 GN=Mettl7a1 PE=1 SV=1	14	4	Mettl7a1	1.153	0.744279	High	High	High	High	Peak Found	High	Peak Found	High	High	High
High	Master Protein	Q9QYS9	Protein quaking OS=Mus musculus OX=10090 GN=Qki PE=1 SV=1	45	10	Qki	0.887	0.744279	High	High	High	High	High	High	High	High	High	High
High	Master Protein	P97492	Regulator of G-protein signaling 14 OS=Mus musculus OX=10090 GN=Rgs14 PE=1 SV=2	128	19	Rgs14	0.893	0.744279	High	High	High	High	High	High	High	High	High	High
High	Master Protein	Q6PDY2	2-aminoethanethiol dioxygenase OS=Mus musculus OX=10090 GN=Ado PE=1 SV=2	51	8	Ado	1.098	0.74431	High	High	High	High	High	High	High	High	High	High
High	Master Protein	A0A1B0GRU0	Vesicular glutamate transporter 1 OS=Mus musculus OX=10090 GN=Slc17a7 PE=1 SV=1	305	15	Slc17a7	0.929	0.74431	High	High	High	High	High	High	High	High	High	High
High	Master Protein	P26231	Catenin alpha-1 OS=Mus musculus OX=10090 GN=Ctnna1 PE=1 SV=1	187	20	Ctnna1	1.075	0.744631	High	High	High	High	High	High	High	High	High	High
High	Master Protein	Q9JMK2	Casein kinase I isoform epsilon OS=Mus musculus OX=10090 GN=Csnk1e PE=1 SV=2	53	4	Csnk1e	1.105	0.744704	High	High	High	High	High	High	High	High	High	High
High	Master Protein	P62830	60S ribosomal protein L23 OS=Mus musculus OX=10090 GN=Rpl23 PE=1 SV=1	82	6	Rpl23	0.905	0.744704	High	High	High	High	High	High	High	High	High	High
High	Master Protein	Q9D8B3	Charged multivesicular body protein 4b OS=Mus musculus OX=10090 GN=Chmp4b PE=1 SV=2	87	6	Chmp4b	1.066	0.744704	High	High	High	High	High	High	High	High	High	High
High	Master Protein	Q8K4Z0	Leucine-rich repeat LGI family member 2 OS=Mus musculus OX=10090 GN=Lgi2 PE=2 SV=1	25	8	Lgi2	1.084	0.744704	High	High	High	Peak Found	High	High	High	High	High	High
High	Master Protein	A0A1B0GT88	Brain-enriched guanylate kinase-associated protein OS=Mus musculus OX=10090 GN=Begain PE=1 SV=1	105	17	Begain	1.078	0.744704	High	High	High	High	High	High	High	High	High	High
High	Master Protein	G3UXW9	COP9 signalosome complex subunit 1 OS=Mus musculus OX=10090 GN=Gps1 PE=1 SV=1	159	18	Gps1	0.905	0.744704	High	High	High	High	High	High	High	High	High	High
High	Master Protein	Q9R013	Cathepsin F OS=Mus musculus OX=10090 GN=Ctsf PE=1 SV=1	26	6	Ctsf	1.104	0.745351	High	High	High	High	High	High	High	High	High	High
High	Master Protein	G5E850	Cytochrome b5 OS=Mus musculus OX=10090 GN=Cyb5a PE=1 SV=1	22	4	Cyb5a	0.858	0.74623	High	High	High	High	High	High	High	High	High	High
High	Master Protein	P46935	E3 ubiquitin-protein ligase NEDD4 OS=Mus musculus OX=10090 GN=Nedd4 PE=1 SV=3	56	7	Nedd4	1.116	0.74623	High	High	High	High	High	High	High	High	High	High
High	Master Protein	P63276	40S ribosomal protein S17 OS=Mus musculus OX=10090 GN=Rps17 PE=1 SV=2	64	7	Rps17	0.901	0.74623	High	High	High	High	High	High	High	High	High	High
High	Master Protein	P62082	40S ribosomal protein S7 OS=Mus musculus OX=10090 GN=Rps7 PE=2 SV=1	68	9	Rps7	0.892	0.74623	High	High	High	High	High	High	High	High	High	High
High	Master Protein	Q9Z0P5	Twinfilin-2 OS=Mus musculus OX=10090 GN=Twf2 PE=1 SV=1	115	15	Twf2	0.895	0.74623	High	High	High	High	High	High	High	High	High	High
High	Master Protein	Q8VCX5	Calcium uptake protein 1, mitochondrial OS=Mus musculus OX=10090 GN=Micu1 PE=1 SV=1	43	9	Micu1	1.081	0.747091	High	High	High	High	High	High	High	High	High	High
High	Master Protein	Q5DTN8	Janus kinase and microtubule-interacting protein 3 OS=Mus musculus OX=10090 GN=Jakmip3 PE=1 SV=2	6	2	Jakmip3	0.746	0.747483	Not Found	Peak Found	Peak Found	High	Peak Found	Peak Found	High	Peak Found	Not Found	High
High	Master Protein	Q9CQV6	Microtubule-associated proteins 1A/1B light chain 3B OS=Mus musculus OX=10090 GN=Map1lc3b PE=1 SV=3	41	3	Map1lc3b	1.064	0.748339	High	High	High	High	High	High	High	High	High	High
High	Master Protein	Q6W4W7	DIA3 OS=Mus musculus OX=10090 GN=Diaph2 PE=1 SV=1	51	14	Diaph2	0.883	0.748503	High	High	High	High	High	High	High	High	High	High
High	Master Protein	P12382	ATP-dependent 6-phosphofructokinase, liver type OS=Mus musculus OX=10090 GN=Pfkl PE=1 SV=4	297	20	Pfkl	0.92	0.748503	High	High	High	High	High	High	High	High	High	High
High	Master Protein	Q8R4N0	Citramalyl-CoA lyase, mitochondrial OS=Mus musculus OX=10090 GN=Clybl PE=1 SV=2	117	15	Clybl	1.064	0.748775	High	High	High	High	High	High	High	High	High	High
High	Master Protein	A2AGS6	Tumor protein p53-inducible protein 11 (Fragment) OS=Mus musculus OX=10090 GN=Trp53i11 PE=1 SV=1	30	2	Trp53i11	1.092	0.749349	High	High	High	High	High	High	High	High	High	High
High	Master Protein	Q9CQ85	Mitochondrial import inner membrane translocase subunit Tim22 OS=Mus musculus OX=10090 GN=Timm22 PE=1 SV=1	19	3	Timm22	1.101	0.749349	High	High	High	High	High	High	High	High	High	High
High	Master Protein	O35326	Serine/arginine-rich splicing factor 5 OS=Mus musculus OX=10090 GN=Srsf5 PE=1 SV=2	7	3	Srsf5	0.858	0.749349	Peak Found	High	High	High	Peak Found	High	High	Peak Found	Peak Found	High
High	Master Protein	A2AHB7	Potassium channel subfamily T member 1 OS=Mus musculus OX=10090 GN=Kcnt1 PE=1 SV=1	17	4	Kcnt1	1.085	0.749349	High	High	High	Peak Found	High	High	High	High	Peak Found	High
High	Master Protein	Q91WC0	Actin-histidine N-methyltransferase OS=Mus musculus OX=10090 GN=Setd3 PE=1 SV=1	10	4	Setd3	1.163	0.749349	High	High	Peak Found	High	High	Peak Found	High	High	High	Peak Found
High	Master Protein	E9PVC7	Cyclin-dependent kinase 14 OS=Mus musculus OX=10090 GN=Cdk14 PE=1 SV=1	21	4	Cdk14	1.144	0.749349	High	Peak Found	High	High	High	High	High	High	High	High
High	Master Protein	P62806	Histone H4 OS=Mus musculus OX=10090 GN=H4c1 PE=1 SV=2	11	4	H4c1; H4c11; H4c12; H4c14; H4c2; H4c3; H4c4; H4c6; H4c8; H4c9; H4f16; Hist1h4m	1.15	0.749349	High	High	High	Peak Found	Peak Found	High	Peak Found	High	Peak Found	High
High	Master Protein	Q91YM4	FAST kinase domain-containing protein 4 OS=Mus musculus OX=10090 GN=Tbrg4 PE=1 SV=1	32	7	Tbrg4	1.144	0.749349	High	High	High	High	High	High	High	High	High	High
High	Master Protein	Q3UHB8	Coiled-coil domain-containing protein 177 OS=Mus musculus OX=10090 GN=Ccdc177 PE=1 SV=1	83	14	Ccdc177	1.064	0.749349	High	High	High	High	High	High	High	High	High	High
High	Master Protein	O35129	Prohibitin-2 OS=Mus musculus OX=10090 GN=Phb2 PE=1 SV=1	224	19	Phb2	1.074	0.749349	High	High	High	High	High	High	High	High	High	High
High	Master Protein	O54865	Guanylate cyclase soluble subunit beta-1 OS=Mus musculus OX=10090 GN=Gucy1b1 PE=1 SV=1	118	21	Gucy1b1	0.897	0.749349	High	High	High	High	High	High	High	High	High	High
High	Master Protein	O88844	Isocitrate dehydrogenase [NADP] cytoplasmic OS=Mus musculus OX=10090 GN=Idh1 PE=1 SV=2	246	25	Idh1	0.92	0.749349	High	High	High	High	High	High	High	High	High	High
High	Master Protein	Q99N91	39S ribosomal protein L34, mitochondrial OS=Mus musculus OX=10090 GN=Mrpl34 PE=1 SV=1	4	3	Mrpl34	1.144	0.749635	Peak Found	Peak Found	High	Peak Found	Peak Found	High	High	Peak Found	High	Peak Found
High	Master Protein	Q9DA03	Complex III assembly factor LYRM7 OS=Mus musculus OX=10090 GN=Lyrm7 PE=3 SV=2	20	4	Lyrm7	1.159	0.749635	High	High	High	High	High	High	High	High	High	High
High	Master Protein	Q01279	Epidermal growth factor receptor OS=Mus musculus OX=10090 GN=Egfr PE=1 SV=1	16	5	Egfr	1.16	0.749635	High	High	Peak Found	High	High	High	High	High	High	High
High	Master Protein	P26883	Peptidyl-prolyl cis-trans isomerase FKBP1A OS=Mus musculus OX=10090 GN=Fkbp1a PE=1 SV=2	169	6	Fkbp1a	0.93	0.749635	High	High	High	High	High	High	High	High	High	High
High	Master Protein	P83093	Stromal interaction molecule 2 OS=Mus musculus OX=10090 GN=Stim2 PE=1 SV=2	22	6	Stim2	1.143	0.749635	High	High	High	High	High	High	High	High	High	High
High	Master Protein	F8WJ98	Transmembrane and coiled-coil domains protein 1 (Fragment) OS=Mus musculus OX=10090 GN=Tmcc1 PE=1 SV=2	26	6	Tmcc1	1.146	0.749635	High	High	High	High	Peak Found	Peak Found	High	High	High	High
High	Master Protein	O08842	GDNF family receptor alpha-2 OS=Mus musculus OX=10090 GN=Gfra2 PE=1 SV=2	61	8	Gfra2	1.079	0.749635	High	High	High	High	High	High	High	High	High	High
High	Master Protein	P31938	Dual specificity mitogen-activated protein kinase kinase 1 OS=Mus musculus OX=10090 GN=Map2k1 PE=1 SV=2	266	14	Map2k1	0.931	0.749635	High	High	High	High	High	High	High	High	High	High
High	Master Protein	Q8VEH5	EPM2A-interacting protein 1 OS=Mus musculus OX=10090 GN=Epm2aip1 PE=1 SV=1	90	16	Epm2aip1	0.899	0.749635	High	High	High	High	High	High	High	High	High	High
High	Master Protein	P61264	Syntaxin-1B OS=Mus musculus OX=10090 GN=Stx1b PE=1 SV=1	560	17	Stx1b	1.073	0.749635	High	High	High	High	High	High	High	High	High	High
High	Master Protein	Q80U23	Syntaphilin OS=Mus musculus OX=10090 GN=Snph PE=1 SV=3	163	17	Snph	1.068	0.749635	High	High	High	High	High	High	High	High	High	High
High	Master Protein	Q80VP0	Tectonin beta-propeller repeat-containing protein 1 OS=Mus musculus OX=10090 GN=Tecpr1 PE=1 SV=1	133	25	Tecpr1	0.91	0.749635	High	High	High	High	High	High	High	High	High	High
High	Master Protein	P31650	Sodium- and chloride-dependent GABA transporter 3 OS=Mus musculus OX=10090 GN=Slc6a11 PE=1 SV=2	99	7	Slc6a11	0.922	0.751216	High	High	High	High	High	High	High	High	High	High
High	Master Protein	I7HLV2	60S ribosomal protein L10 (Fragment) OS=Mus musculus OX=10090 GN=Rpl10 PE=1 SV=1	84	11	Rpl10	0.911	0.751865	High	High	High	High	High	High	High	High	High	High
High	Master Protein	Q8C0M9	Isoaspartyl peptidase/L-asparaginase OS=Mus musculus OX=10090 GN=Asrgl1 PE=1 SV=1	155	13	Asrgl1	0.931	0.751865	High	High	High	High	High	High	High	High	High	High
High	Master Protein	Q99L04	Dehydrogenase/reductase SDR family member 1 OS=Mus musculus OX=10090 GN=Dhrs1 PE=1 SV=1	113	14	Dhrs1	1.061	0.751865	High	High	High	High	High	High	High	High	High	High
High	Master Protein	Q8BYL4	Tyrosine--tRNA ligase, mitochondrial OS=Mus musculus OX=10090 GN=Yars2 PE=1 SV=2	33	11	Yars2	1.078	0.752282	High	High	High	High	High	High	High	High	High	High
High	Master Protein	Q8BH24	Transmembrane 9 superfamily member 4 OS=Mus musculus OX=10090 GN=Tm9sf4 PE=1 SV=1	41	9	Tm9sf4	1.1	0.752585	High	High	High	High	High	High	High	High	High	High
High	Master Protein	E9PX50	Sodium/calcium exchanger 3 OS=Mus musculus OX=10090 GN=Slc8a3 PE=1 SV=2	2	2	Slc8a3	1.319	0.752881	Not Found	High	Not Found	Peak Found	Not Found	Peak Found	Not Found	High	Peak Found	Peak Found
High	Master Protein	Q9WV98	Mitochondrial import inner membrane translocase subunit Tim9 OS=Mus musculus OX=10090 GN=Timm9 PE=1 SV=1	85	5	Timm9	1.067	0.752881	High	High	High	High	High	High	High	High	High	High
High	Master Protein	Q8BIJ6	Isoleucine--tRNA ligase, mitochondrial OS=Mus musculus OX=10090 GN=Iars2 PE=1 SV=1	361	35	Iars2	1.072	0.752881	High	High	High	High	High	High	High	High	High	High
High	Master Protein	Q9ER73	Elongator complex protein 4 OS=Mus musculus OX=10090 GN=Elp4 PE=1 SV=2	29	6	Elp4	1.141	0.753079	High	High	High	High	High	High	High	High	High	High
High	Master Protein	E9QA46	Peroxisomal assembly protein PEX3 OS=Mus musculus OX=10090 GN=Pex3 PE=1 SV=1	6	4	Pex3	1.218	0.75404	Peak Found	Peak Found	Peak Found	Peak Found	Peak Found	Peak Found	High	High	High	High
High	Master Protein	Q9DCL8	Protein phosphatase inhibitor 2 OS=Mus musculus OX=10090 GN=Ppp1r2 PE=1 SV=3	52	6	Ppp1r2	0.89	0.75404	High	High	High	High	High	High	High	High	High	High
High	Master Protein	A0A286YDL2	Metal transporter CNNM1 OS=Mus musculus OX=10090 GN=Cnnm1 PE=1 SV=1	35	2	Cnnm1	1.103	0.755461	Peak Found	Peak Found	High	High	High	Peak Found	High	Peak Found	Peak Found	Peak Found
High	Master Protein	Q9JIW9	Ras-related protein Ral-B OS=Mus musculus OX=10090 GN=Ralb PE=1 SV=1	63	3	Ralb	0.861	0.755461	High	High	High	High	High	High	High	High	High	High
High	Master Protein	P60755	MAM domain-containing glycosylphosphatidylinositol anchor protein 2 OS=Mus musculus OX=10090 GN=Mdga2 PE=1 SV=1	32	7	Mdga2	1.144	0.755461	High	High	High	High	High	High	High	High	High	High
High	Master Protein	Q8CDA1	Phosphatidylinositide phosphatase SAC2 OS=Mus musculus OX=10090 GN=Inpp5f PE=1 SV=1	11	8	Inpp5f	1.066	0.755461	Peak Found	High	High	Peak Found	Peak Found	Peak Found	High	High	High	High
High	Master Protein	Q6P069	Sorcin OS=Mus musculus OX=10090 GN=Sri PE=1 SV=1	109	10	Sri	0.906	0.755461	High	High	High	High	High	High	High	High	High	High
High	Master Protein	Q01853	Transitional endoplasmic reticulum ATPase OS=Mus musculus OX=10090 GN=Vcp PE=1 SV=4	737	64	Vcp	0.931	0.755461	High	High	High	High	High	High	High	High	High	High
High	Master Protein	P52825	Carnitine O-palmitoyltransferase 2, mitochondrial OS=Mus musculus OX=10090 GN=Cpt2 PE=1 SV=2	34	6	Cpt2	1.14	0.755652	High	High	High	High	High	High	High	High	High	High
High	Master Protein	P62855	40S ribosomal protein S26 OS=Mus musculus OX=10090 GN=Rps26 PE=1 SV=3	14	2	Rps26	0.89	0.756504	High	High	Peak Found	High	High	High	High	High	High	High
High	Master Protein	F8VQD7	Protein-tyrosine-phosphatase OS=Mus musculus OX=10090 GN=Ptprg PE=1 SV=1	8	3	Ptprg	0.857	0.756504	Peak Found	High	High	High	Peak Found	Peak Found	High	High	High	Peak Found
High	Master Protein	Q6PIP5	NudC domain-containing protein 1 OS=Mus musculus OX=10090 GN=Nudcd1 PE=1 SV=2	6	4	Nudcd1	0.841	0.756504	Peak Found	High	Peak Found	High	Peak Found	High	Peak Found	Peak Found	High	High
High	Master Protein	Q80XQ2	TBC1 domain family member 5 OS=Mus musculus OX=10090 GN=Tbc1d5 PE=1 SV=2	22	8	Tbc1d5	1.137	0.756504	High	High	High	Peak Found	High	High	High	High	High	High
High	Master Protein	Q61102	ATP-binding cassette sub-family B member 7, mitochondrial OS=Mus musculus OX=10090 GN=Abcb7 PE=1 SV=3	63	11	Abcb7	1.082	0.756504	High	High	High	High	High	High	High	High	High	High
High	Master Protein	P83741	Serine/threonine-protein kinase WNK1 OS=Mus musculus OX=10090 GN=Wnk1 PE=1 SV=2	19	3	Wnk1	1.17	0.75699	High	High	High	High	High	Peak Found	Peak Found	High	Peak Found	Peak Found
High	Master Protein	Q9CZG9	PDZ domain-containing protein 11 OS=Mus musculus OX=10090 GN=Pdzd11 PE=1 SV=1	14	4	Pdzd11	1.155	0.75841	High	Peak Found	High	High	High	Peak Found	High	High	High	High
High	Master Protein	P52760	2-iminobutanoate/2-iminopropanoate deaminase OS=Mus musculus OX=10090 GN=Rida PE=1 SV=3	138	10	Rida	1.064	0.758892	High	High	High	High	High	High	High	High	High	High
High	Master Protein	Q9JKV1	Proteasomal ubiquitin receptor ADRM1 OS=Mus musculus OX=10090 GN=Adrm1 PE=1 SV=2	16	5	Adrm1	0.891	0.7591	High	High	High	High	High	High	High	High	High	High
High	Master Protein	O88545	COP9 signalosome complex subunit 6 OS=Mus musculus OX=10090 GN=Cops6 PE=1 SV=1	78	8	Cops6	0.892	0.7591	High	High	High	High	High	High	High	High	High	High
High	Master Protein	Q9CZ83	39S ribosomal protein L55, mitochondrial OS=Mus musculus OX=10090 GN=Mrpl55 PE=1 SV=1	11	2	Mrpl55	1.336	0.759444	High	Peak Found	High	High	High	High	High	High	High	High
High	Master Protein	Q9JLR1	Protein transport protein Sec61 subunit alpha isoform 2 OS=Mus musculus OX=10090 GN=Sec61a2 PE=2 SV=3	5	3	Sec61a2	0.826	0.759444	High	High	Peak Found	Peak Found	Peak Found	Peak Found	Peak Found	High	Peak Found	Peak Found
High	Master Protein	A0A0A0MQL0	Tomoregulin-1 (Fragment) OS=Mus musculus OX=10090 GN=Tmeff1 PE=1 SV=1	6	4	Tmeff1	1.121	0.759444	Peak Found	High	Peak Found	Peak Found	Peak Found	High	High	Peak Found	High	Peak Found
High	Master Protein	E9QAC6	Galectin OS=Mus musculus OX=10090 GN=Gm49486 PE=1 SV=1	37	5	Gm49486	1.067	0.759444	High	High	High	High	Peak Found	High	High	High	High	High
High	Master Protein	P63137	Gamma-aminobutyric acid receptor subunit beta-2 OS=Mus musculus OX=10090 GN=Gabrb2 PE=1 SV=2	61	6	Gabrb2	0.888	0.759444	High	High	High	High	High	High	High	High	High	High
High	Master Protein	Q9D6K5	Synaptojanin-2-binding protein OS=Mus musculus OX=10090 GN=Synj2bp PE=1 SV=1	49	7	Synj2bp	1.067	0.759444	High	High	High	High	High	High	High	High	High	High
High	Master Protein	Q5EBJ4	Ermin OS=Mus musculus OX=10090 GN=Ermn PE=1 SV=1	57	10	Ermn	1.077	0.759444	High	High	High	High	High	High	High	High	High	High
High	Master Protein	Q8BFZ9	Erlin-2 OS=Mus musculus OX=10090 GN=Erlin2 PE=1 SV=1	77	10	Erlin2	1.063	0.759444	High	High	High	High	High	High	High	High	High	High
High	Master Protein	A0A0A6YW06	Protein enabled homolog OS=Mus musculus OX=10090 GN=Enah PE=1 SV=1	44	11	Enah	1.073	0.759444	High	High	High	High	High	High	High	High	High	High
High	Master Protein	A0A0G2JEG6	Membrane-associated guanylate kinase, WW and PDZ domain-containing protein 2 OS=Mus musculus OX=10090 GN=Magi2 PE=1 SV=1	108	21	Magi2	1.081	0.759444	High	High	High	High	High	High	High	High	High	High
High	Master Protein	Q7TSH4	Centriolar coiled-coil protein of 110 kDa OS=Mus musculus OX=10090 GN=Ccp110 PE=1 SV=1	2	2	Ccp110	1.301	0.759624	Peak Found	Peak Found	Peak Found	Peak Found	Peak Found	Peak Found	High	Peak Found	High	Peak Found
High	Master Protein	Q8JZU2	Tricarboxylate transport protein, mitochondrial OS=Mus musculus OX=10090 GN=Slc25a1 PE=1 SV=1	56	9	Slc25a1	1.072	0.760077	High	High	High	High	High	High	High	High	High	High
High	Master Protein	P60853	Leucine zipper putative tumor suppressor 1 OS=Mus musculus OX=10090 GN=Lzts1 PE=2 SV=3	20	9	Lzts1	1.121	0.763674	High	High	High	High	High	High	High	High	High	High
High	Master Protein	Q60597	2-oxoglutarate dehydrogenase, mitochondrial OS=Mus musculus OX=10090 GN=Ogdh PE=1 SV=3	776	47	Ogdh	1.071	0.764151	High	High	High	High	High	High	High	High	High	High
High	Master Protein	E9Q7G1	Transmembrane p24-trafficking protein 7 OS=Mus musculus OX=10090 GN=Tmed7 PE=1 SV=1	37	4	Tmed7	1.094	0.764572	High	High	High	High	High	High	High	High	High	High
High	Master Protein	Q8BXV2	BRI3-binding protein OS=Mus musculus OX=10090 GN=Bri3bp PE=1 SV=1	39	5	Bri3bp	1.058	0.765033	High	High	High	High	High	High	High	High	High	High
High	Master Protein	Q9CPX7	28S ribosomal protein S16, mitochondrial OS=Mus musculus OX=10090 GN=Mrps16 PE=1 SV=1	14	2	Mrps16	1.2	0.765206	High	High	High	High	High	High	High	High	High	High
High	Master Protein	O35643	AP-1 complex subunit beta-1 OS=Mus musculus OX=10090 GN=Ap1b1 PE=1 SV=2	727	30	Ap1b1	0.932	0.765206	High	High	High	High	High	High	High	High	High	High
High	Master Protein	Q9CQZ6	NADH dehydrogenase [ubiquinone] 1 beta subcomplex subunit 3 OS=Mus musculus OX=10090 GN=Ndufb3 PE=1 SV=1	51	6	Ndufb3	1.062	0.766052	High	High	High	High	High	High	High	High	High	High
High	Master Protein	B2RXQ2	Ppfia1 protein OS=Mus musculus OX=10090 GN=Ppfia1 PE=1 SV=1	79	4	Ppfia1	0.817	0.766614	High	Peak Found	High	High	Not Found	Peak Found	High	High	Peak Found	Peak Found
High	Master Protein	Q9D6Y7	Mitochondrial peptide methionine sulfoxide reductase OS=Mus musculus OX=10090 GN=Msra PE=1 SV=1	39	9	Msra	1.073	0.766776	High	High	High	High	High	High	High	High	High	High
High	Master Protein	Q9WVD5	Mitochondrial ornithine transporter 1 OS=Mus musculus OX=10090 GN=Slc25a15 PE=1 SV=1	3	2	Slc25a15	1.316	0.767509	Peak Found	High	Peak Found	Peak Found	Peak Found	High	Peak Found	High	Peak Found	Not Found
High	Master Protein	Q9D0L7	Armadillo repeat-containing protein 10 OS=Mus musculus OX=10090 GN=Armc10 PE=1 SV=1	76	6	Armc10	1.061	0.767509	High	High	High	High	High	High	High	High	High	High
High	Master Protein	Q8BKZ9	Pyruvate dehydrogenase protein X component, mitochondrial OS=Mus musculus OX=10090 GN=Pdhx PE=1 SV=1	209	16	Pdhx	1.071	0.767881	High	High	High	High	High	High	High	High	High	High
High	Master Protein	P48036	Annexin A5 OS=Mus musculus OX=10090 GN=Anxa5 PE=1 SV=1	251	23	Anxa5	1.071	0.768844	High	High	High	High	High	High	High	High	High	High
High	Master Protein	P60867	40S ribosomal protein S20 OS=Mus musculus OX=10090 GN=Rps20 PE=1 SV=1	49	4	Rps20	1.067	0.768931	High	High	High	High	High	High	High	High	High	High
High	Master Protein	A0A1L1SR84	Protein turtle homolog B OS=Mus musculus OX=10090 GN=Igsf9b PE=1 SV=1	12	5	Igsf9b	1.14	0.769795	High	High	High	High	High	Peak Found	High	High	Peak Found	Peak Found
High	Master Protein	Q3UHH0	Calcium-transporting ATPase OS=Mus musculus OX=10090 GN=Atp2b2 PE=1 SV=1	1206	4	Atp2b2	1.071	0.770302	High	High	High	High	High	High	High	High	High	High
High	Master Protein	Q9QXW9	Large neutral amino acids transporter small subunit 2 OS=Mus musculus OX=10090 GN=Slc7a8 PE=1 SV=1	21	4	Slc7a8	0.891	0.771138	High	High	High	High	High	High	High	High	High	High
High	Master Protein	Q8CI43	Myosin light chain 6B OS=Mus musculus OX=10090 GN=Myl6b PE=1 SV=1	27	3	Myl6b	1.191	0.771253	Peak Found	Peak Found	Peak Found	High	Peak Found	Peak Found	Peak Found	High	High	Peak Found
High	Master Protein	E0CYX9	Coiled-coil domain-containing protein 127 (Fragment) OS=Mus musculus OX=10090 GN=Ccdc127 PE=1 SV=1	39	6	Ccdc127	1.099	0.771253	High	High	High	High	High	High	High	High	High	High
High	Master Protein	D3YZI9	PiggyBac transposable element-derived protein 5 OS=Mus musculus OX=10090 GN=Pgbd5 PE=1 SV=1	27	6	Pgbd5	1.099	0.771253	High	High	High	High	High	Peak Found	High	High	High	High
High	Master Protein	Q5KU39	Vacuolar protein sorting-associated protein 41 homolog OS=Mus musculus OX=10090 GN=Vps41 PE=1 SV=1	12	7	Vps41	1.162	0.771253	High	Peak Found	High	Peak Found	High	High	High	High	High	Peak Found
High	Master Protein	Q80VC9	Calmodulin-regulated spectrin-associated protein 3 OS=Mus musculus OX=10090 GN=Camsap3 PE=1 SV=1	94	26	Camsap3	1.069	0.771253	High	High	High	High	High	High	High	High	High	High
High	Master Protein	Q3U4W8	Ubiquitin carboxyl-terminal hydrolase OS=Mus musculus OX=10090 GN=Usp5 PE=1 SV=1	407	41	Usp5	0.933	0.771253	High	High	High	High	High	High	High	High	High	High
High	Master Protein	O35316	Sodium- and chloride-dependent taurine transporter OS=Mus musculus OX=10090 GN=Slc6a6 PE=1 SV=2	34	2	Slc6a6	1.189	0.772759	High	High	High	High	High	High	High	High	High	High
High	Master Protein	Q9D1G3	Protein-cysteine N-palmitoyltransferase HHAT-like protein OS=Mus musculus OX=10090 GN=Hhatl PE=1 SV=2	2	2	Hhatl	1.296	0.772759	Peak Found	Peak Found	Peak Found	Peak Found	Peak Found	Peak Found	Not Found	High	High	Peak Found
High	Master Protein	Q9ER47	Potassium voltage-gated channel subfamily H member 7 OS=Mus musculus OX=10090 GN=Kcnh7 PE=1 SV=2	18	4	Kcnh7	1.164	0.772759	High	High	High	High	High	Peak Found	High	High	High	High
High	Master Protein	Q8R3Q0	Store-operated calcium entry-associated regulatory factor OS=Mus musculus OX=10090 GN=Saraf PE=1 SV=2	11	6	Saraf	1.144	0.772759	High	High	High	Peak Found	High	Peak Found	High	High	Peak Found	High
High	Master Protein	Q8R2K3	Single-stranded DNA-binding protein, mitochondrial OS=Mus musculus OX=10090 GN=Ssbp1 PE=1 SV=1	63	7	Ssbp1	1.073	0.772759	High	High	High	High	High	High	High	High	High	High
High	Master Protein	Q80X85	28S ribosomal protein S7, mitochondrial OS=Mus musculus OX=10090 GN=Mrps7 PE=1 SV=1	37	7	Mrps7	1.097	0.772759	High	High	High	High	High	High	High	High	High	High
High	Master Protein	Q61753	D-3-phosphoglycerate dehydrogenase OS=Mus musculus OX=10090 GN=Phgdh PE=1 SV=3	287	22	Phgdh	0.933	0.772759	High	High	High	High	High	High	High	High	High	High
High	Master Protein	Q8VDM4	26S proteasome non-ATPase regulatory subunit 2 OS=Mus musculus OX=10090 GN=Psmd2 PE=1 SV=1	226	28	Psmd2	0.929	0.772759	High	High	High	High	High	High	High	High	High	High
High	Master Protein	P18242	Cathepsin D OS=Mus musculus OX=10090 GN=Ctsd PE=1 SV=1	177	11	Ctsd	1.07	0.773202	High	High	High	High	High	High	High	High	High	High
High	Master Protein	Q3UZI5	Pleiotrophin OS=Mus musculus OX=10090 GN=Ptn PE=1 SV=1	51	3	Ptn	0.893	0.773526	High	High	High	High	High	High	High	High	High	High
High	Master Protein	E9Q0P8	Non-specific serine/threonine protein kinase OS=Mus musculus OX=10090 GN=Araf PE=1 SV=1	31	3	Araf	0.889	0.773526	High	Peak Found	High	High	High	High	High	High	High	Peak Found
High	Master Protein	A0A338P7K6	Metabotropic glutamate receptor 4 OS=Mus musculus OX=10090 GN=Grm4 PE=1 SV=1	21	3	Grm4	1.175	0.773526	High	High	High	High	High	High	Peak Found	High	Peak Found	Peak Found
High	Master Protein	Q8BG92	Clavesin-2 OS=Mus musculus OX=10090 GN=Clvs2 PE=1 SV=1	21	4	Clvs2	0.833	0.773526	Peak Found	Peak Found	High	High	High	High	High	High	High	High
High	Master Protein	Q61733	28S ribosomal protein S31, mitochondrial OS=Mus musculus OX=10090 GN=Mrps31 PE=1 SV=1	21	6	Mrps31	0.859	0.773526	High	High	Peak Found	High	High	High	High	High	High	High
High	Master Protein	Q9D061	Acyl-CoA-binding domain-containing protein 6 OS=Mus musculus OX=10090 GN=Acbd6 PE=1 SV=2	67	11	Acbd6	1.076	0.773526	High	High	High	High	High	High	High	High	High	High
High	Master Protein	Q9ERD7	Tubulin beta-3 chain OS=Mus musculus OX=10090 GN=Tubb3 PE=1 SV=1	5033	12	Tubb3	0.933	0.773526	High	High	High	High	High	High	High	High	High	High
High	Master Protein	P24549	Retinal dehydrogenase 1 OS=Mus musculus OX=10090 GN=Aldh1a1 PE=1 SV=5	102	12	Aldh1a1	0.91	0.773526	High	High	High	High	High	High	High	High	High	High
High	Master Protein	A0A0A6YWY8	Protocadherin 9 OS=Mus musculus OX=10090 GN=Pcdh9 PE=1 SV=1	84	13	Pcdh9	1.073	0.773526	High	High	High	High	High	High	High	High	High	High
High	Master Protein	Q8BW75	Amine oxidase [flavin-containing] B OS=Mus musculus OX=10090 GN=Maob PE=1 SV=4	183	16	Maob	1.06	0.773526	High	High	High	High	High	High	High	High	High	High
High	Master Protein	P34914	Bifunctional epoxide hydrolase 2 OS=Mus musculus OX=10090 GN=Ephx2 PE=1 SV=2	94	17	Ephx2	0.902	0.773526	High	High	High	High	High	High	High	High	High	High
High	Master Protein	Q00612	Glucose-6-phosphate 1-dehydrogenase X OS=Mus musculus OX=10090 GN=G6pdx PE=1 SV=3	109	22	G6pdx	0.921	0.773526	High	High	High	High	High	High	High	High	High	High
High	Master Protein	Q8K1M6	Dynamin-1-like protein OS=Mus musculus OX=10090 GN=Dnm1l PE=1 SV=2	570	2	Dnm1l	0.891	0.773941	High	High	High	High	High	High	High	High	High	High
High	Master Protein	P61028	Ras-related protein Rab-8B OS=Mus musculus OX=10090 GN=Rab8b PE=1 SV=1	113	2	Rab8b	0.896	0.773941	High	High	High	High	High	High	High	High	High	High
High	Master Protein	F7AVU1	Cerebral cavernous malformations protein 2 homolog OS=Mus musculus OX=10090 GN=Ccm2 PE=1 SV=2	3	2	Ccm2	1.248	0.773941	Peak Found	Peak Found	Peak Found	High	High	High	Peak Found	Peak Found	Peak Found	Peak Found
High	Master Protein	D6RFU9	Synaptophysin-like protein OS=Mus musculus OX=10090 GN=Sypl PE=1 SV=1	13	2	Sypl	1.139	0.773941	High	High	High	High	High	Peak Found	High	High	High	Peak Found
High	Master Protein	Q8BGZ2	Protein FAM168A OS=Mus musculus OX=10090 GN=Fam168a PE=1 SV=1	3	3	Fam168a	1.215	0.773941	Peak Found	Peak Found	High	Peak Found	Peak Found	High	High	Peak Found	Peak Found	Peak Found
High	Master Protein	P50586	Tubby protein OS=Mus musculus OX=10090 GN=Tub PE=1 SV=1	11	6	Tub	1.141	0.773941	High	High	Peak Found	Peak Found	High	High	High	High	Peak Found	High
High	Master Protein	P00405	Cytochrome c oxidase subunit 2 OS=Mus musculus OX=10090 GN=Mtco2 PE=1 SV=1	429	7	Mtco2	0.934	0.773941	High	High	High	High	High	High	High	High	High	High
High	Master Protein	P11531	Dystrophin OS=Mus musculus OX=10090 GN=Dmd PE=1 SV=3	33	9	Dmd	0.867	0.773941	High	High	High	High	High	Peak Found	High	High	High	High
High	Master Protein	Q64288	Olfactory marker protein OS=Mus musculus OX=10090 GN=Omp PE=1 SV=3	42	10	Omp	1.135	0.773941	Peak Found	Peak Found	High	High	High	Peak Found	High	High	Peak Found	Peak Found
High	Master Protein	Q9CQI6	Coactosin-like protein OS=Mus musculus OX=10090 GN=Cotl1 PE=1 SV=3	128	10	Cotl1	0.923	0.773941	High	High	High	High	High	High	High	High	High	High
High	Master Protein	Q9EPL2	Calsyntenin-1 OS=Mus musculus OX=10090 GN=Clstn1 PE=1 SV=1	51	11	Clstn1	1.082	0.773941	High	High	High	High	High	High	High	High	High	High
High	Master Protein	Q9DCS3	Enoyl-[acyl-carrier-protein] reductase, mitochondrial OS=Mus musculus OX=10090 GN=Mecr PE=1 SV=2	94	13	Mecr	1.061	0.773941	High	High	High	High	High	High	High	High	High	High
High	Master Protein	Q9R0Q6	Actin-related protein 2/3 complex subunit 1A OS=Mus musculus OX=10090 GN=Arpc1a PE=1 SV=1	249	21	Arpc1a	0.932	0.773941	High	High	High	High	High	High	High	High	High	High
High	Master Protein	H3BIV5	A-kinase anchor protein 5 OS=Mus musculus OX=10090 GN=Akap5 PE=1 SV=1	293	27	Akap5	0.934	0.773941	High	High	High	High	High	High	High	High	High	High
High	Master Protein	Q91VK4	Integral membrane protein 2C OS=Mus musculus OX=10090 GN=Itm2c PE=1 SV=2	8	3	Itm2c	1.098	0.77443	High	High	High	Peak Found	High	High	Peak Found	Peak Found	Peak Found	High
High	Master Protein	Q8BK72	28S ribosomal protein S27, mitochondrial OS=Mus musculus OX=10090 GN=Mrps27 PE=1 SV=2	56	10	Mrps27	1.095	0.77443	High	High	High	High	High	High	High	High	High	High
High	Master Protein	P35564	Calnexin OS=Mus musculus OX=10090 GN=Canx PE=1 SV=1	287	24	Canx	0.934	0.77443	High	High	High	High	High	High	High	High	High	High
High	Master Protein	Q60936	Atypical kinase COQ8A, mitochondrial OS=Mus musculus OX=10090 GN=Coq8a PE=1 SV=2	10	4	Coq8a	1.147	0.776427	High	High	High	Peak Found	High	High	Peak Found	High	High	High
High	Master Protein	D3Z742	Protein MB21D2 OS=Mus musculus OX=10090 GN=Mb21d2 PE=1 SV=1	20	4	Mb21d2	1.135	0.777175	High	High	High	High	High	Peak Found	High	High	High	High
High	Master Protein	Q8K2Y7	39S ribosomal protein L47, mitochondrial OS=Mus musculus OX=10090 GN=Mrpl47 PE=1 SV=2	15	2	Mrpl47	1.163	0.777292	High	High	Peak Found	High	High	Peak Found	High	High	High	High
High	Master Protein	O35098	Dihydropyrimidinase-related protein 4 OS=Mus musculus OX=10090 GN=Dpysl4 PE=1 SV=1	468	37	Dpysl4	0.934	0.777292	High	High	High	High	High	High	High	High	High	High
High	Master Protein	O55142	60S ribosomal protein L35a OS=Mus musculus OX=10090 GN=Rpl35a PE=1 SV=2	9	3	Rpl35a	0.921	0.777635	High	Peak Found	High	Peak Found	High	High	Peak Found	High	High	High
High	Master Protein	Q9D1I6	39S ribosomal protein L14, mitochondrial OS=Mus musculus OX=10090 GN=Mrpl14 PE=1 SV=1	14	4	Mrpl14	1.149	0.777635	High	High	High	Peak Found	High	High	High	High	High	High
High	Master Protein	Q9QYR6	Microtubule-associated protein 1A OS=Mus musculus OX=10090 GN=Map1a PE=1 SV=2	1256	105	Map1a	0.934	0.777874	High	High	High	High	High	High	High	High	High	High
High	Master Protein	Q9D415	Disks large-associated protein 1 OS=Mus musculus OX=10090 GN=Dlgap1 PE=1 SV=3	155	6	Dlgap1	1.06	0.778073	High	High	High	High	High	High	High	High	High	High
High	Master Protein	A0A1B0GSA5	Phospholipase DDHD2 OS=Mus musculus OX=10090 GN=Ddhd2 PE=1 SV=1	35	10	Ddhd2	0.886	0.778073	High	High	High	High	Peak Found	High	High	High	High	High
High	Master Protein	Q99K48	Non-POU domain-containing octamer-binding protein OS=Mus musculus OX=10090 GN=Nono PE=1 SV=3	4	3	Nono	0.774	0.778361	Peak Found	High	High	Peak Found	Peak Found	Peak Found	Peak Found	High	High	Peak Found
High	Master Protein	Q3U5C7	Prickle-like protein 1 OS=Mus musculus OX=10090 GN=Prickle1 PE=1 SV=1	8	3	Prickle1	1.186	0.77903	High	High	Peak Found	High	Peak Found	Peak Found	High	Peak Found	Peak Found	Peak Found
High	Master Protein	E9QP99	Golgin subfamily A member 3 OS=Mus musculus OX=10090 GN=Golga3 PE=1 SV=1	63	18	Golga3	1.068	0.77903	High	High	High	High	High	High	High	High	High	High
High	Master Protein	Q68FL0	Na(+)/Ca(2+)-exchange protein 1 OS=Mus musculus OX=10090 GN=Slc8a1 PE=1 SV=1	192	19	Slc8a1	1.064	0.779467	High	High	High	High	High	High	High	High	High	High
High	Master Protein	Q61024	Asparagine synthetase [glutamine-hydrolyzing] OS=Mus musculus OX=10090 GN=Asns PE=1 SV=3	18	8	Asns	0.883	0.779819	High	Peak Found	High	Peak Found	Peak Found	High	High	High	High	High
High	Master Protein	P21460	Cystatin-C OS=Mus musculus OX=10090 GN=Cst3 PE=1 SV=2	76	6	Cst3	0.914	0.781045	High	High	High	High	High	High	High	High	High	High
High	Master Protein	Q9QYM9	Tomoregulin-2 OS=Mus musculus OX=10090 GN=Tmeff2 PE=2 SV=1	17	4	Tmeff2	1.094	0.784515	High	High	High	High	High	High	High	High	Peak Found	High
High	Master Protein	A2ATS6	Reticulon-4 receptor-like 2 (Fragment) OS=Mus musculus OX=10090 GN=Rtn4rl2 PE=1 SV=1	34	6	Rtn4rl2	1.061	0.784515	High	High	High	High	High	High	High	High	High	High
High	Master Protein	Q8K406	Leucine-rich repeat LGI family member 3 OS=Mus musculus OX=10090 GN=Lgi3 PE=1 SV=1	38	9	Lgi3	1.131	0.784515	High	High	High	High	High	High	High	High	High	High
High	Master Protein	Q8K411	Presequence protease, mitochondrial OS=Mus musculus OX=10090 GN=Pitrm1 PE=1 SV=1	108	23	Pitrm1	1.059	0.785477	High	High	High	High	High	High	High	High	High	High
High	Master Protein	Q99JR1	Sideroflexin-1 OS=Mus musculus OX=10090 GN=Sfxn1 PE=1 SV=3	228	11	Sfxn1	1.065	0.785808	High	High	High	High	High	High	High	High	High	High
High	Master Protein	Q8VHQ9	Acyl-coenzyme A thioesterase 11 OS=Mus musculus OX=10090 GN=Acot11 PE=1 SV=1	66	13	Acot11	0.896	0.785808	High	High	High	High	High	High	High	High	High	High
High	Master Protein	Q9WTS5	Teneurin-2 OS=Mus musculus OX=10090 GN=Tenm2 PE=1 SV=1	58	14	Tenm2	1.095	0.785808	High	High	High	High	High	High	High	High	High	High
High	Master Protein	P70296	Phosphatidylethanolamine-binding protein 1 OS=Mus musculus OX=10090 GN=Pebp1 PE=1 SV=3	414	12	Pebp1	0.935	0.785926	High	High	High	High	High	High	High	High	High	High
High	Master Protein	B9EJA2	Cortactin-binding protein 2 OS=Mus musculus OX=10090 GN=Cttnbp2 PE=1 SV=2	177	22	Cttnbp2	1.063	0.786336	High	High	High	High	High	High	High	High	High	High
High	Master Protein	Q9DCM2	Glutathione S-transferase kappa 1 OS=Mus musculus OX=10090 GN=Gstk1 PE=1 SV=3	47	8	Gstk1	1.073	0.787153	High	High	High	High	High	High	High	High	High	High
High	Master Protein	Q61016	Guanine nucleotide-binding protein G(I)/G(S)/G(O) subunit gamma-7 OS=Mus musculus OX=10090 GN=Gng7 PE=1 SV=2	23	3	Gng7	0.902	0.787728	High	High	High	High	High	High	High	High	High	High
High	Master Protein	O35682	Myeloid-associated differentiation marker OS=Mus musculus OX=10090 GN=Myadm PE=1 SV=2	34	4	Myadm	0.896	0.787728	High	High	High	High	High	High	High	High	High	High
High	Master Protein	P70297	Signal transducing adapter molecule 1 OS=Mus musculus OX=10090 GN=Stam PE=1 SV=3	111	14	Stam	0.915	0.787728	High	High	High	High	High	High	High	High	High	High
High	Master Protein	A2ARP1	Inositol hexakisphosphate and diphosphoinositol-pentakisphosphate kinase 1 OS=Mus musculus OX=10090 GN=Ppip5k1 PE=1 SV=1	3	2	Ppip5k1	0.816	0.789054	Peak Found	Peak Found	Peak Found	High	Peak Found	Peak Found	High	High	Peak Found	Peak Found
High	Master Protein	Q9Z2U1	Proteasome subunit alpha type-5 OS=Mus musculus OX=10090 GN=Psma5 PE=1 SV=1	122	11	Psma5	0.923	0.789308	High	High	High	High	High	High	High	High	High	High
High	Master Protein	Q80X95	Ras-related GTP-binding protein A OS=Mus musculus OX=10090 GN=Rraga PE=1 SV=1	6	2	Rraga	0.835	0.789374	Peak Found	High	Peak Found	Peak Found	High	Peak Found	High	High	High	High
High	Master Protein	Q9QXV0	ProSAAS OS=Mus musculus OX=10090 GN=Pcsk1n PE=1 SV=2	57	6	Pcsk1n	0.895	0.789374	High	High	High	High	High	High	High	High	High	High
High	Master Protein	Q9QXB9	Developmentally-regulated GTP-binding protein 2 OS=Mus musculus OX=10090 GN=Drg2 PE=1 SV=1	16	6	Drg2	0.889	0.789374	High	High	High	Peak Found	High	High	High	High	High	High
High	Master Protein	P62897	Cytochrome c, somatic OS=Mus musculus OX=10090 GN=Cycs PE=1 SV=2	418	13	Cycs	1.068	0.789374	High	High	High	High	High	High	High	High	High	High
High	Master Protein	G5E8R3	Pyruvate carboxylase OS=Mus musculus OX=10090 GN=Pcx PE=1 SV=1	536	51	Pcx	1.068	0.789374	High	High	High	High	High	High	High	High	High	High
High	Master Protein	A2RSX7	tRNA wybutosine-synthesizing protein 5 OS=Mus musculus OX=10090 GN=Tyw5 PE=2 SV=2	2	2	Tyw5	0.865	0.790386	Peak Found	Peak Found	Peak Found	Peak Found	Peak Found	Peak Found	Peak Found	High	High	Peak Found
High	Master Protein	Q60709	Amyloid-like protein 2 OS=Mus musculus OX=10090 GN=Aplp2 PE=1 SV=1	65	3	Aplp2	0.894	0.790386	High	High	High	High	High	High	High	High	High	High
High	Master Protein	Q64519	Syndecan-3 OS=Mus musculus OX=10090 GN=Sdc3 PE=1 SV=2	10	3	Sdc3	1.122	0.790386	Peak Found	Peak Found	High	High	High	High	High	Peak Found	High	Peak Found
High	Master Protein	A0A0N4SW28	Guanine nucleotide-binding protein subunit gamma OS=Mus musculus OX=10090 GN=Gng12 PE=1 SV=1	76	5	Gng12	1.057	0.790386	High	High	High	High	High	High	High	High	High	High
High	Master Protein	A2AI89	Phosphorylase b kinase regulatory subunit OS=Mus musculus OX=10090 GN=Phka1 PE=1 SV=1	8	5	Phka1	0.87	0.790386	High	Peak Found	High	Peak Found	High	High	High	High	Peak Found	Peak Found
High	Master Protein	Q9ER35	Fructosamine-3-kinase OS=Mus musculus OX=10090 GN=Fn3k PE=1 SV=1	39	6	Fn3k	0.897	0.790386	High	High	High	High	High	High	High	High	High	High
High	Master Protein	Q91XH6	Vesicle transport through interaction with t-SNAREs 1B homolog OS=Mus musculus OX=10090 GN=Vti1b PE=1 SV=1	73	9	Vti1b	1.063	0.790386	High	High	High	High	High	High	High	High	High	High
High	Master Protein	O55026	Ectonucleoside triphosphate diphosphohydrolase 2 OS=Mus musculus OX=10090 GN=Entpd2 PE=1 SV=2	56	9	Entpd2	0.901	0.790386	High	High	High	High	High	High	High	High	High	High
High	Master Protein	Q99PT1	Rho GDP-dissociation inhibitor 1 OS=Mus musculus OX=10090 GN=Arhgdia PE=1 SV=3	138	10	Arhgdia	0.936	0.790386	High	High	High	High	High	High	High	High	High	High
High	Master Protein	P63158	High mobility group protein B1 OS=Mus musculus OX=10090 GN=Hmgb1 PE=1 SV=2	68	10	Hmgb1	0.898	0.790386	High	High	High	High	High	High	High	High	High	High
High	Master Protein	Q0VGU4	Neurosecretory protein VGF OS=Mus musculus OX=10090 GN=Vgf PE=1 SV=1	71	12	Vgf	0.9	0.790386	High	High	High	High	High	High	High	High	High	High
High	Master Protein	P28741	Kinesin-like protein KIF3A OS=Mus musculus OX=10090 GN=Kif3a PE=1 SV=2	59	12	Kif3a	1.071	0.790386	High	High	High	High	High	High	High	High	High	High
High	Master Protein	A2AHJ7	Diacylglycerol kinase OS=Mus musculus OX=10090 GN=Dgkz PE=1 SV=1	91	13	Dgkz	0.895	0.790386	High	High	High	High	High	High	High	High	High	High
High	Master Protein	P46664	Adenylosuccinate synthetase isozyme 2 OS=Mus musculus OX=10090 GN=Adss2 PE=1 SV=2	86	13	Adss2	0.912	0.790386	High	High	High	High	High	High	High	High	High	High
High	Master Protein	Q9D0I9	Arginine--tRNA ligase, cytoplasmic OS=Mus musculus OX=10090 GN=Rars1 PE=1 SV=2	129	22	Rars1	0.904	0.790386	High	High	High	High	High	High	High	High	High	High
High	Master Protein	A0A0R4J0Z1	Protein disulfide-isomerase A4 OS=Mus musculus OX=10090 GN=Pdia4 PE=1 SV=1	185	26	Pdia4	1.057	0.790386	High	High	High	High	High	High	High	High	High	High
High	Master Protein	E9PVA8	eIF-2-alpha kinase activator GCN1 OS=Mus musculus OX=10090 GN=Gcn1 PE=1 SV=1	64	28	Gcn1	0.912	0.790386	High	High	High	High	High	High	High	High	High	High
High	Master Protein	P48722	Heat shock 70 kDa protein 4L OS=Mus musculus OX=10090 GN=Hspa4l PE=1 SV=2	544	43	Hspa4l	0.936	0.790386	High	High	High	High	High	High	High	High	High	High
High	Master Protein	Q9D7N3	28S ribosomal protein S9, mitochondrial OS=Mus musculus OX=10090 GN=Mrps9 PE=1 SV=3	29	5	Mrps9	1.13	0.790672	High	High	High	High	High	High	High	High	High	High
High	Master Protein	P62242	40S ribosomal protein S8 OS=Mus musculus OX=10090 GN=Rps8 PE=1 SV=2	79	11	Rps8	0.923	0.790672	High	High	High	High	High	High	High	High	High	High
High	Master Protein	O35215	D-dopachrome decarboxylase OS=Mus musculus OX=10090 GN=Ddt PE=1 SV=3	111	5	Ddt	0.925	0.79072	High	High	High	High	High	High	High	High	High	High
High	Master Protein	Q9DB27	Malignant T-cell-amplified sequence 1 OS=Mus musculus OX=10090 GN=Mcts1 PE=1 SV=1	58	7	Mcts1	0.901	0.79072	High	High	High	High	High	High	High	High	High	High
High	Master Protein	Q8BL66	Early endosome antigen 1 OS=Mus musculus OX=10090 GN=Eea1 PE=1 SV=2	194	44	Eea1	1.057	0.79072	High	High	High	High	High	High	High	High	High	High
High	Master Protein	Q8C0M2	(Lyso)-N-acylphosphatidylethanolamine lipase OS=Mus musculus OX=10090 GN=Abhd4 PE=1 SV=1	3	3	Abhd4	1.134	0.791668	Peak Found	Peak Found	Peak Found	Peak Found	Peak Found	High	Peak Found	High	Peak Found	Peak Found
High	Master Protein	Q8R1S0	Ubiquinone biosynthesis monooxygenase COQ6, mitochondrial OS=Mus musculus OX=10090 GN=Coq6 PE=1 SV=3	38	8	Coq6	1.097	0.791668	High	High	High	High	High	High	High	High	High	High
High	Master Protein	A0A087WSM1	Islet cell autoantigen 1-like protein OS=Mus musculus OX=10090 GN=Ica1l PE=1 SV=1	3	2	Ica1l	1.305	0.793152	Peak Found	Peak Found	High	Peak Found	Peak Found	Peak Found	Peak Found	High	Peak Found	Peak Found
High	Master Protein	Q8CAL5	Glypican-5 OS=Mus musculus OX=10090 GN=Gpc5 PE=2 SV=1	14	4	Gpc5	1.138	0.793152	High	High	High	High	Peak Found	High	High	High	High	High
High	Master Protein	Q8VDD8	WASH complex subunit 1 OS=Mus musculus OX=10090 GN=Washc1 PE=1 SV=1	11	6	Washc1	1.157	0.793152	High	Peak Found	High	High	High	High	High	High	High	High
High	Master Protein	Q922R1	UPF0183 protein C16orf70 homolog OS=Mus musculus OX=10090 PE=1 SV=2	46	7		0.896	0.793152	High	High	High	High	High	High	High	High	High	High
High	Master Protein	Q07235	Glia-derived nexin OS=Mus musculus OX=10090 GN=Serpine2 PE=1 SV=2	25	7	Serpine2	0.878	0.793152	High	High	High	High	High	High	High	High	High	High
High	Master Protein	Q9DBP5	UMP-CMP kinase OS=Mus musculus OX=10090 GN=Cmpk1 PE=1 SV=1	141	13	Cmpk1	0.927	0.793152	High	High	High	High	High	High	High	High	High	High
High	Master Protein	Q9WVK4	EH domain-containing protein 1 OS=Mus musculus OX=10090 GN=Ehd1 PE=1 SV=1	216	18	Ehd1	0.912	0.793152	High	High	High	High	High	High	High	High	High	High
High	Master Protein	Q9DCP2	Sodium-coupled neutral amino acid transporter 3 OS=Mus musculus OX=10090 GN=Slc38a3 PE=1 SV=1	77	7	Slc38a3	0.906	0.793915	High	High	High	High	High	High	High	High	High	High
High	Master Protein	Q8BHJ7	Gamma-aminobutyric acid receptor subunit alpha-5 OS=Mus musculus OX=10090 GN=Gabra5 PE=1 SV=1	44	2	Gabra5	1.206	0.793961	High	High	High	High	Peak Found	High	High	High	Peak Found	High
High	Master Protein	Q9CZX7	Type 2 phosphatidylinositol 4,5-bisphosphate 4-phosphatase OS=Mus musculus OX=10090 GN=Pip4p2 PE=1 SV=1	13	5	Pip4p2	0.853	0.795666	Peak Found	High	High	Peak Found	High	High	High	High	High	Peak Found
High	Master Protein	Q9Z1E4	Glycogen [starch] synthase, muscle OS=Mus musculus OX=10090 GN=Gys1 PE=1 SV=2	9	2	Gys1	0.826	0.796453	High	High	Peak Found	Peak Found	Peak Found	High	High	High	High	High
High	Master Protein	Q80W47	WD repeat domain phosphoinositide-interacting protein 2 OS=Mus musculus OX=10090 GN=Wipi2 PE=1 SV=1	23	6	Wipi2	0.883	0.796453	High	High	High	High	High	High	High	High	High	High
High	Master Protein	P15208	Insulin receptor OS=Mus musculus OX=10090 GN=Insr PE=1 SV=2	12	6	Insr	1.131	0.796453	High	High	Peak Found	High	Peak Found	High	High	High	High	High
High	Master Protein	P58044	Isopentenyl-diphosphate Delta-isomerase 1 OS=Mus musculus OX=10090 GN=Idi1 PE=1 SV=1	40	7	Idi1	1.083	0.796453	High	High	High	High	High	High	High	High	High	High
High	Master Protein	A0A5F8MPM1	SHC-transforming protein 3 OS=Mus musculus OX=10090 GN=Shc3 PE=1 SV=1	39	9	Shc3	1.092	0.796453	High	High	High	High	High	High	High	High	High	High
High	Master Protein	O08749	Dihydrolipoyl dehydrogenase, mitochondrial OS=Mus musculus OX=10090 GN=Dld PE=1 SV=2	554	24	Dld	1.067	0.796453	High	High	High	High	High	High	High	High	High	High
High	Master Protein	F7BE84	Ankyrin repeat domain 50 (Fragment) OS=Mus musculus OX=10090 GN=Ankrd50 PE=1 SV=1	8	3	Ankrd50	1.131	0.798084	Peak Found	High	High	High	High	Peak Found	High	High	High	High
High	Master Protein	Q9Z1X2	Phosphatidylserine synthase 2 OS=Mus musculus OX=10090 GN=Ptdss2 PE=1 SV=2	8	2	Ptdss2	0.783	0.798771	High	High	High	Peak Found	High	High	Peak Found	High	Peak Found	High
High	Master Protein	F6U6X3	Dual-specificity kinase OS=Mus musculus OX=10090 GN=Dyrk1a PE=1 SV=1	17	5	Dyrk1a	0.867	0.799123	High	High	High	High	High	High	High	Peak Found	High	High
High	Master Protein	Q9ESK9	RB1-inducible coiled-coil protein 1 OS=Mus musculus OX=10090 GN=Rb1cc1 PE=1 SV=3	16	11	Rb1cc1	1.091	0.799123	High	Peak Found	High	High	High	High	High	Peak Found	High	High
High	Master Protein	P62743	AP-2 complex subunit sigma OS=Mus musculus OX=10090 GN=Ap2s1 PE=1 SV=1	109	7	Ap2s1	1.057	0.799286	High	High	High	High	High	High	High	High	High	High
High	Master Protein	O09126	Semaphorin-4D OS=Mus musculus OX=10090 GN=Sema4d PE=1 SV=2	11	8	Sema4d	1.089	0.801328	High	High	Peak Found	Peak Found	High	High	High	High	High	High
High	Master Protein	Q811U4	Mitofusin-1 OS=Mus musculus OX=10090 GN=Mfn1 PE=1 SV=3	9	3	Mfn1	1.24	0.80153	Peak Found	High	High	High	Peak Found	Peak Found	High	Peak Found	Peak Found	High
High	Master Protein	Q6PAK3	Protein arginine N-methyltransferase 8 OS=Mus musculus OX=10090 GN=Prmt8 PE=1 SV=2	51	8	Prmt8	1.073	0.801532	High	High	High	High	High	High	High	High	High	High
High	Master Protein	Q9EQZ6	Rap guanine nucleotide exchange factor 4 OS=Mus musculus OX=10090 GN=Rapgef4 PE=1 SV=1	127	25	Rapgef4	1.06	0.801532	High	High	High	High	High	High	High	High	High	High
High	Master Protein	O55176	E3 ubiquitin-protein ligase Praja-1 OS=Mus musculus OX=10090 GN=Pja1 PE=1 SV=3	9	2	Pja1	1.168	0.802591	High	Peak Found	High	High	Peak Found	High	High	High	High	High
High	Master Protein	Q9CR51	V-type proton ATPase subunit G 1 OS=Mus musculus OX=10090 GN=Atp6v1g1 PE=1 SV=3	33	4	Atp6v1g1	0.925	0.802591	High	High	High	High	High	High	High	High	High	High
High	Master Protein	Q91WK2	Eukaryotic translation initiation factor 3 subunit H OS=Mus musculus OX=10090 GN=Eif3h PE=1 SV=1	24	7	Eif3h	0.898	0.802591	High	High	High	High	High	High	High	High	High	High
High	Master Protein	Q8BP47	Asparagine--tRNA ligase, cytoplasmic OS=Mus musculus OX=10090 GN=NARS1 PE=1 SV=2	170	20	NARS1	0.92	0.80278	High	High	High	High	High	High	High	High	High	High
High	Master Protein	O55003	BCL2/adenovirus E1B 19 kDa protein-interacting protein 3 OS=Mus musculus OX=10090 GN=Bnip3 PE=1 SV=1	18	3	Bnip3	1.127	0.803032	High	High	High	High	High	High	High	High	High	High
High	Master Protein	P14869	60S acidic ribosomal protein P0 OS=Mus musculus OX=10090 GN=Rplp0 PE=1 SV=3	132	11	Rplp0	0.924	0.803032	High	High	High	High	High	High	High	High	High	High
High	Master Protein	Q8C015	Serine/threonine-protein kinase PAK 5 OS=Mus musculus OX=10090 GN=Pak5 PE=1 SV=1	63	15	Pak5	1.081	0.803032	High	High	High	High	High	High	High	High	High	High
High	Master Protein	O35226	26S proteasome non-ATPase regulatory subunit 4 OS=Mus musculus OX=10090 GN=Psmd4 PE=1 SV=1	59	10	Psmd4	0.901	0.803055	High	High	High	High	High	High	High	High	High	High
High	Master Protein	Q99J39	Malonyl-CoA decarboxylase, mitochondrial OS=Mus musculus OX=10090 GN=Mlycd PE=1 SV=1	45	10	Mlycd	1.089	0.803055	High	High	High	High	High	High	High	High	High	High
High	Master Protein	Q3TVK3	Aspartyl aminopeptidase OS=Mus musculus OX=10090 GN=Dnpep PE=1 SV=1	122	17	Dnpep	0.92	0.803055	High	High	High	High	High	High	High	High	High	High
High	Master Protein	A2ARS0	Ankyrin repeat domain-containing protein 63 OS=Mus musculus OX=10090 GN=Ankrd63 PE=1 SV=1	6	3	Ankrd63	0.842	0.803589	Peak Found	Peak Found	Peak Found	Peak Found	Peak Found	High	High	High	High	Peak Found
High	Master Protein	Q9CQ06	39S ribosomal protein L24, mitochondrial OS=Mus musculus OX=10090 GN=Mrpl24 PE=1 SV=1	10	2	Mrpl24	1.154	0.80367	High	High	High	High	High	High	Peak Found	High	High	High
High	Master Protein	Q3V4B5	COMM domain-containing protein 6 OS=Mus musculus OX=10090 GN=Commd6 PE=1 SV=1	9	2	Commd6	0.836	0.80367	High	High	High	High	High	High	Peak Found	Peak Found	Peak Found	High
High	Master Protein	Q61036	Serine/threonine-protein kinase PAK 3 OS=Mus musculus OX=10090 GN=Pak3 PE=1 SV=2	250	9	Pak3	0.899	0.804395	High	High	High	High	High	High	High	High	High	High
High	Master Protein	Q91XV3	Brain acid soluble protein 1 OS=Mus musculus OX=10090 GN=Basp1 PE=1 SV=3	550	10	Basp1	1.066	0.804412	High	High	High	High	High	High	High	High	High	High
High	Master Protein	Q9CQE8	RNA transcription, translation and transport factor protein OS=Mus musculus OX=10090 GN=RTRAF PE=1 SV=1	79	10	RTRAF	0.901	0.804466	High	High	High	High	High	High	High	High	High	High
High	Master Protein	Q925E7	Serine/threonine-protein phosphatase 2A 55 kDa regulatory subunit B delta isoform OS=Mus musculus OX=10090 GN=Ppp2r2d PE=1 SV=1	69	3	Ppp2r2d	0.859	0.805471	High	High	High	High	Peak Found	High	High	High	High	High
High	Master Protein	A0A0R4J2B7	Dedicator of cytokinesis protein 10 (Fragment) OS=Mus musculus OX=10090 GN=Dock10 PE=1 SV=1	3	3	Dock10	0.817	0.805471	Peak Found	Peak Found	Peak Found	Peak Found	Peak Found	Peak Found	Peak Found	High	High	High
High	Master Protein	Q9CQB5	CDGSH iron-sulfur domain-containing protein 2 OS=Mus musculus OX=10090 GN=Cisd2 PE=1 SV=1	39	5	Cisd2	1.083	0.805471	High	High	High	High	High	High	High	High	High	High
High	Master Protein	P70349	Histidine triad nucleotide-binding protein 1 OS=Mus musculus OX=10090 GN=Hint1 PE=1 SV=3	133	8	Hint1	0.937	0.805471	High	High	High	High	High	High	High	High	High	High
High	Master Protein	Q8BJW6	Eukaryotic translation initiation factor 2A OS=Mus musculus OX=10090 GN=Eif2a PE=1 SV=2	15	8	Eif2a	1.125	0.805471	High	High	High	Peak Found	High	High	High	Peak Found	High	High
High	Master Protein	O08529	Calpain-2 catalytic subunit OS=Mus musculus OX=10090 GN=Capn2 PE=1 SV=4	129	23	Capn2	0.916	0.805547	High	High	High	High	High	High	High	High	High	High
High	Master Protein	Q9Z2F7	BCL2/adenovirus E1B 19 kDa protein-interacting protein 3-like OS=Mus musculus OX=10090 GN=Bnip3l PE=1 SV=1	8	2	Bnip3l	1.183	0.805592	High	High	High	High	High	Peak Found	High	Peak Found	Peak Found	High
High	Master Protein	Q99LB2	Dehydrogenase/reductase SDR family member 4 OS=Mus musculus OX=10090 GN=Dhrs4 PE=1 SV=3	65	8	Dhrs4	1.082	0.805592	High	High	High	High	High	High	High	High	High	High
High	Master Protein	O88951	Protein lin-7 homolog B OS=Mus musculus OX=10090 GN=Lin7b PE=1 SV=2	81	6	Lin7b	1.09	0.805991	High	High	High	High	High	High	High	High	High	High
High	Master Protein	Q9CPU0	Lactoylglutathione lyase OS=Mus musculus OX=10090 GN=Glo1 PE=1 SV=3	170	11	Glo1	0.938	0.805991	High	High	High	High	High	High	High	High	High	High
High	Master Protein	A0A6I8MX08	Girdin OS=Mus musculus OX=10090 GN=Ccdc88a PE=4 SV=1	31	15	Ccdc88a	1.067	0.805991	High	High	High	High	High	High	High	High	High	High
High	Master Protein	P80318	T-complex protein 1 subunit gamma OS=Mus musculus OX=10090 GN=Cct3 PE=1 SV=1	374	28	Cct3	0.938	0.805991	High	High	High	High	High	High	High	High	High	High
High	Master Protein	Q8CC21	Tetratricopeptide repeat protein 19, mitochondrial OS=Mus musculus OX=10090 GN=Ttc19 PE=1 SV=1	21	3	Ttc19	1.132	0.80608	High	High	High	High	High	High	High	High	High	High
High	Master Protein	P48455	Serine/threonine-protein phosphatase 2B catalytic subunit gamma isoform OS=Mus musculus OX=10090 GN=Ppp3cc PE=1 SV=1	123	2	Ppp3cc	1.144	0.806529	High	High	High	High	High	High	High	High	High	High
High	Master Protein	Q80TN4	DnaJ homolog subfamily C member 16 OS=Mus musculus OX=10090 GN=Dnajc16 PE=1 SV=2	8	2	Dnajc16	0.862	0.806529	High	High	High	High	High	High	Peak Found	Peak Found	High	Peak Found
High	Master Protein	F6SPK0	Ubiquitin-conjugating enzyme E2 J1 (Fragment) OS=Mus musculus OX=10090 GN=Ube2j1 PE=1 SV=1	13	3	Ube2j1	0.843	0.806529	High	High	High	High	High	High	High	High	High	High
High	Master Protein	A0A0A0MQ68	Glutaryl-CoA dehydrogenase, mitochondrial OS=Mus musculus OX=10090 GN=Gcdh PE=1 SV=1	69	11	Gcdh	1.073	0.807594	High	High	High	High	High	High	High	High	High	High
High	Master Protein	P14094	Sodium/potassium-transporting ATPase subunit beta-1 OS=Mus musculus OX=10090 GN=Atp1b1 PE=1 SV=1	976	20	Atp1b1	1.065	0.808239	High	High	High	High	High	High	High	High	High	High
High	Master Protein	Q9QXS6	Drebrin OS=Mus musculus OX=10090 GN=Dbn1 PE=1 SV=4	304	5	Dbn1	1.065	0.809499	High	High	High	High	High	High	High	High	High	High
High	Master Protein	Q9R1T4	Septin-6 OS=Mus musculus OX=10090 GN=Septin6 PE=1 SV=4	374	12	Septin6	1.065	0.812954	High	High	High	High	High	High	High	High	High	High
High	Master Protein	P58281	Dynamin-like 120 kDa protein, mitochondrial OS=Mus musculus OX=10090 GN=Opa1 PE=1 SV=1	756	47	Opa1	1.065	0.812986	High	High	High	High	High	High	High	High	High	High
High	Master Protein	E9PUL5	Proline-rich transmembrane protein 2 OS=Mus musculus OX=10090 GN=Prrt2 PE=1 SV=1	109	8	Prrt2	0.938	0.813019	High	High	High	High	High	High	High	High	High	High
High	Master Protein	A6H6A9	Rab GTPase-activating protein 1-like OS=Mus musculus OX=10090 GN=Rabgap1l PE=1 SV=1	11	6	Rabgap1l	0.841	0.813427	High	High	High	High	Peak Found	High	High	High	High	High
High	Master Protein	Q9CQV4	Reticulophagy regulator 3 OS=Mus musculus OX=10090 GN=Retreg3 PE=1 SV=1	2	2	Retreg3	0.796	0.81374	Peak Found	Not Found	Not Found	Not Found	Not Found	Peak Found	High	Peak Found	Peak Found	High
High	Master Protein	Q9R078	5'-AMP-activated protein kinase subunit beta-1 OS=Mus musculus OX=10090 GN=Prkab1 PE=1 SV=2	12	3	Prkab1	0.842	0.81374	High	High	High	High	High	Peak Found	Peak Found	High	High	High
High	Master Protein	F7ASU3	Mitochondrial Rho GTPase 1 (Fragment) OS=Mus musculus OX=10090 GN=Rhot1 PE=1 SV=1	37	2	Rhot1	1.188	0.814845	Peak Found	High	Peak Found	Peak Found	Peak Found	High	Peak Found	Peak Found	Peak Found	Peak Found
High	Master Protein	Q8VD26	Transmembrane protein 143 OS=Mus musculus OX=10090 GN=Tmem143 PE=1 SV=1	5	2	Tmem143	1.295	0.815451	High	Peak Found	Peak Found	High	Peak Found	Peak Found	Peak Found	High	High	Peak Found
High	Master Protein	Q8R191	Synaptogyrin-3 OS=Mus musculus OX=10090 GN=Syngr3 PE=1 SV=1	67	6	Syngr3	0.938	0.815451	High	High	High	High	High	High	High	High	High	High
High	Master Protein	E9PXQ7	Protocadherin 10 OS=Mus musculus OX=10090 GN=Pcdh10 PE=1 SV=1	45	13	Pcdh10	0.9	0.816371	High	High	High	High	High	High	High	High	High	High
High	Master Protein	Q9D4H1	Exocyst complex component 2 OS=Mus musculus OX=10090 GN=Exoc2 PE=1 SV=1	132	23	Exoc2	0.915	0.816371	High	High	High	High	High	High	High	High	High	High
High	Master Protein	A0A0G2JGW6	Cyclin-dependent kinase-like 5 OS=Mus musculus OX=10090 GN=Cdkl5 PE=1 SV=1	115	24	Cdkl5	1.062	0.816371	High	High	High	High	High	High	High	High	High	High
High	Master Protein	O08644	Ephrin type-B receptor 6 OS=Mus musculus OX=10090 GN=Ephb6 PE=2 SV=4	19	6	Ephb6	1.146	0.816994	High	High	High	High	High	High	High	High	Peak Found	High
High	Master Protein	Q3V2R3	Chimaerin OS=Mus musculus OX=10090 GN=Chn2 PE=1 SV=1	3	2	Chn2	0.773	0.818591	Peak Found	Peak Found	Peak Found	Peak Found	Not Found	Not Found	Peak Found	High	Peak Found	High
High	Master Protein	Q9R112	Sulfide:quinone oxidoreductase, mitochondrial OS=Mus musculus OX=10090 GN=Sqor PE=1 SV=3	7	4	Sqor	1.089	0.818591	High	Peak Found	Peak Found	High	Peak Found	High	Peak Found	Peak Found	High	High
High	Master Protein	Q8BPU7	Engulfment and cell motility protein 1 OS=Mus musculus OX=10090 GN=Elmo1 PE=1 SV=2	27	6	Elmo1	0.877	0.818591	High	Peak Found	Peak Found	High	Peak Found	High	High	High	High	High
High	Master Protein	Q8R081	Heterogeneous nuclear ribonucleoprotein L OS=Mus musculus OX=10090 GN=Hnrnpl PE=1 SV=2	22	7	Hnrnpl	0.939	0.818591	High	High	High	High	High	High	High	High	High	High
High	Master Protein	P70290	55 kDa erythrocyte membrane protein OS=Mus musculus OX=10090 GN=Mpp1 PE=1 SV=1	100	20	Mpp1	1.051	0.818591	High	High	High	High	High	High	High	High	High	High
High	Master Protein	Q5U4F6	WD repeat-containing protein 34 OS=Mus musculus OX=10090 GN=Wdr34 PE=1 SV=2	2	2		0.787	0.819577	Peak Found	Peak Found	Peak Found	Peak Found	Peak Found	High	Peak Found	Peak Found	Peak Found	Peak Found
High	Master Protein	A0A087WRN5	Predicted gene 13889 OS=Mus musculus OX=10090 GN=Gm13889 PE=1 SV=1	3	2	Gm13889	0.811	0.819712	High	Peak Found	Peak Found	Peak Found	Peak Found	High	Peak Found	Peak Found	Peak Found	High
High	Master Protein	Q9D7A8	Armadillo repeat-containing protein 1 OS=Mus musculus OX=10090 GN=Armc1 PE=1 SV=1	73	8	Armc1	0.902	0.820456	High	High	High	High	High	High	High	High	High	High
High	Master Protein	A2AGI2	Neuroligin-3 OS=Mus musculus OX=10090 GN=Nlgn3 PE=1 SV=1	121	12	Nlgn3	1.052	0.820841	High	High	High	High	High	High	High	High	High	High
High	Master Protein	P14873	Microtubule-associated protein 1B OS=Mus musculus OX=10090 GN=Map1b PE=1 SV=2	1199	104	Map1b	0.939	0.821066	High	High	High	High	High	High	High	High	High	High
High	Master Protein	Q9EPU0	Regulator of nonsense transcripts 1 OS=Mus musculus OX=10090 GN=Upf1 PE=1 SV=2	136	32	Upf1	0.928	0.821933	High	High	High	High	High	High	High	High	High	High
High	Master Protein	P47911	60S ribosomal protein L6 OS=Mus musculus OX=10090 GN=Rpl6 PE=1 SV=3	130	13	Rpl6	0.928	0.822093	High	High	High	High	High	High	High	High	High	High
High	Master Protein	A0A1L1SSV8	Serine/threonine-protein kinase TAO2 (Fragment) OS=Mus musculus OX=10090 GN=Taok2 PE=1 SV=1	14	2	Taok2	0.84	0.822285	High	High	High	High	Peak Found	High	High	High	High	Peak Found
High	Master Protein	O08688	Calpain-5 OS=Mus musculus OX=10090 GN=Capn5 PE=1 SV=1	70	13	Capn5	1.061	0.822285	High	High	High	High	High	High	High	High	High	High
High	Master Protein	Q6PER3	Microtubule-associated protein RP/EB family member 3 OS=Mus musculus OX=10090 GN=Mapre3 PE=1 SV=1	217	2	Mapre3	0.939	0.822876	High	High	High	High	High	High	High	High	High	High
High	Master Protein	Q99N57	RAF proto-oncogene serine/threonine-protein kinase OS=Mus musculus OX=10090 GN=Raf1 PE=1 SV=2	9	2	Raf1	0.831	0.822876	Peak Found	Peak Found	Peak Found	Peak Found	Peak Found	Peak Found	High	Peak Found	High	Peak Found
High	Master Protein	Q9EQG9	Ceramide transfer protein OS=Mus musculus OX=10090 GN=Cert1 PE=1 SV=1	6	2	Cert1	0.835	0.822876	High	High	High	Peak Found	Peak Found	High	High	Peak Found	Peak Found	High
High	Master Protein	Q6P8I4	PEST proteolytic signal-containing nuclear protein OS=Mus musculus OX=10090 GN=Pcnp PE=1 SV=1	15	3	Pcnp	1.057	0.822876	High	High	High	High	Peak Found	High	High	High	High	High
High	Master Protein	Q6NVF0	Inositol polyphosphate 5-phosphatase OCRL OS=Mus musculus OX=10090 GN=Ocrl PE=1 SV=1	54	12	Ocrl	0.913	0.822876	High	High	High	High	High	High	High	High	High	High
High	Master Protein	Q9DBE8	Alpha-1,3/1,6-mannosyltransferase ALG2 OS=Mus musculus OX=10090 GN=Alg2 PE=1 SV=2	100	15	Alg2	0.919	0.822876	High	High	High	High	High	High	High	High	High	High
High	Master Protein	P61358	60S ribosomal protein L27 OS=Mus musculus OX=10090 GN=Rpl27 PE=1 SV=2	61	7	Rpl27	0.907	0.822989	High	High	High	High	High	High	High	High	High	High
High	Master Protein	Q810A7	ATP-dependent RNA helicase DDX42 OS=Mus musculus OX=10090 GN=Ddx42 PE=1 SV=3	3	2	Ddx42	1.125	0.823466	Peak Found	Peak Found	High	Peak Found	High	Peak Found	Peak Found	High	Peak Found	Peak Found
High	Master Protein	Q9Z2I9	Succinate--CoA ligase [ADP-forming] subunit beta, mitochondrial OS=Mus musculus OX=10090 GN=Sucla2 PE=1 SV=2	441	27	Sucla2	1.063	0.823544	High	High	High	High	High	High	High	High	High	High
High	Master Protein	P97427	Dihydropyrimidinase-related protein 1 OS=Mus musculus OX=10090 GN=Crmp1 PE=1 SV=1	873	2	Crmp1	1.067	0.824273	High	High	High	High	High	High	High	High	High	High
High	Master Protein	A0A286YCW7	Neuritin (Fragment) OS=Mus musculus OX=10090 GN=Nrn1 PE=1 SV=1	46	3	Nrn1	1.051	0.824273	High	High	High	High	High	High	High	High	High	High
High	Master Protein	G5E814	Complex I-B14.7 OS=Mus musculus OX=10090 GN=Ndufa11 PE=1 SV=1	64	9	Ndufa11	0.902	0.824273	High	High	High	High	High	High	High	High	High	High
High	Master Protein	P62881	Guanine nucleotide-binding protein subunit beta-5 OS=Mus musculus OX=10090 GN=Gnb5 PE=1 SV=1	101	11	Gnb5	0.926	0.824273	High	High	High	High	High	High	High	High	High	High
High	Master Protein	A0A3B2WBH9	Tight junction protein ZO-2 OS=Mus musculus OX=10090 GN=Tjp2 PE=1 SV=1	59	13	Tjp2	1.085	0.824273	High	High	High	High	High	High	High	High	High	High
High	Master Protein	Q62167	ATP-dependent RNA helicase DDX3X OS=Mus musculus OX=10090 GN=Ddx3x PE=1 SV=3	157	24	Ddx3x	0.92	0.824273	High	High	High	High	High	High	High	High	High	High
High	Master Protein	A0A338P6P0	Leucine-zipper-like transcriptional regulator 1 OS=Mus musculus OX=10090 GN=Lztr1 PE=1 SV=1	3	2	Lztr1	0.768	0.824555	Peak Found	Peak Found	High	Peak Found	High	Not Found	Peak Found	Not Found	Not Found	Peak Found
High	Master Protein	Q9CR86	Calcium-regulated heat stable protein 1 OS=Mus musculus OX=10090 GN=Carhsp1 PE=1 SV=1	10	3	Carhsp1	0.847	0.824963	High	High	High	High	High	Peak Found	Peak Found	High	High	Peak Found
High	Master Protein	Q9Z1F9	SUMO-activating enzyme subunit 2 OS=Mus musculus OX=10090 GN=Uba2 PE=1 SV=1	13	5	Uba2	1.059	0.824963	High	High	Peak Found	High	High	High	High	High	High	High
High	Master Protein	D3YZU4	SH3 and multiple ankyrin repeat domains protein 1 OS=Mus musculus OX=10090 GN=Shank1 PE=1 SV=1	528	58	Shank1	1.064	0.824963	High	High	High	High	High	High	High	High	High	High
High	Master Protein	Q91Z53	Glyoxylate reductase/hydroxypyruvate reductase OS=Mus musculus OX=10090 GN=Grhpr PE=1 SV=1	134	13	Grhpr	1.054	0.825284	High	High	High	High	High	High	High	High	High	High
High	Master Protein	Q922Q4	Pyrroline-5-carboxylate reductase 2 OS=Mus musculus OX=10090 GN=Pycr2 PE=1 SV=1	61	10	Pycr2	1.065	0.825338	High	High	High	High	High	High	High	High	High	High
High	Master Protein	Q9CZR8	Elongation factor Ts, mitochondrial OS=Mus musculus OX=10090 GN=Tsfm PE=1 SV=1	103	12	Tsfm	1.051	0.825338	High	High	High	High	High	High	High	High	High	High
High	Master Protein	Q68ED7	CREB-regulated transcription coactivator 1 OS=Mus musculus OX=10090 GN=Crtc1 PE=1 SV=1	46	7	Crtc1	0.901	0.825886	High	High	High	High	High	High	High	High	High	High
High	Master Protein	F6R6F1	RalBP1-associated Eps domain-containing protein 1 (Fragment) OS=Mus musculus OX=10090 GN=Reps1 PE=1 SV=1	59	8	Reps1	1.081	0.825886	High	High	High	High	High	High	High	High	High	High
High	Master Protein	Q9CQV1	Mitochondrial import inner membrane translocase subunit TIM16 OS=Mus musculus OX=10090 GN=Pam16 PE=1 SV=1	22	5	Pam16	1.08	0.826083	High	High	High	High	High	High	High	High	High	High
High	Master Protein	Q9DAK9	14 kDa phosphohistidine phosphatase OS=Mus musculus OX=10090 GN=Phpt1 PE=1 SV=1	82	6	Phpt1	0.917	0.826449	High	High	High	High	High	High	High	High	High	High
High	Master Protein	Q8C2Q7	Heterogeneous nuclear ribonucleoprotein H OS=Mus musculus OX=10090 GN=Hnrnph1 PE=1 SV=1	69	3	Hnrnph1	0.904	0.82658	High	High	High	Peak Found	High	High	High	High	High	High
High	Master Protein	B2RWC4	Gm88 protein OS=Mus musculus OX=10090 GN=Lrrc73 PE=1 SV=1	25	3	Lrrc73	1.122	0.82658	High	High	High	High	High	High	High	High	High	High
High	Master Protein	Q6ZWR6	Nesprin-1 OS=Mus musculus OX=10090 GN=Syne1 PE=1 SV=2	208	67	Syne1	1.053	0.82658	High	High	High	High	High	High	High	High	High	High
High	Master Protein	Q9Z275	Retinaldehyde-binding protein 1 OS=Mus musculus OX=10090 GN=Rlbp1 PE=1 SV=3	19	5	Rlbp1	0.88	0.82734	High	High	High	High	High	High	High	High	High	High
High	Master Protein	Q80WM4	Hyaluronan and proteoglycan link protein 4 OS=Mus musculus OX=10090 GN=Hapln4 PE=2 SV=2	82	11	Hapln4	1.077	0.827411	High	High	High	High	High	High	High	High	High	High
High	Master Protein	A0A1L1SVK0	Platelet-activating factor acetylhydrolase IB subunit beta (Fragment) OS=Mus musculus OX=10090 GN=Pafah1b2 PE=1 SV=1	78	5	Pafah1b2	0.928	0.828729	High	High	High	High	High	High	High	High	High	High
High	Master Protein	Q8BHC4	Dephospho-CoA kinase domain-containing protein OS=Mus musculus OX=10090 GN=Dcakd PE=1 SV=1	12	3	Dcakd	1.121	0.829189	High	High	Peak Found	High	High	High	High	High	High	High
High	Master Protein	Q61249	Immunoglobulin-binding protein 1 OS=Mus musculus OX=10090 GN=Igbp1 PE=1 SV=1	5	5	Igbp1	0.879	0.829189	Peak Found	Peak Found	High	Peak Found	Peak Found	High	High	Peak Found	Peak Found	Peak Found
High	Master Protein	P32037	Solute carrier family 2, facilitated glucose transporter member 3 OS=Mus musculus OX=10090 GN=Slc2a3 PE=1 SV=1	146	9	Slc2a3	1.062	0.830366	High	High	High	High	High	High	High	High	High	High
High	Master Protein	Q3UVG3	Protein FAM91A1 OS=Mus musculus OX=10090 GN=Fam91a1 PE=1 SV=1	12	4	Fam91a1	0.843	0.830518	High	High	High	Peak Found	High	High	High	High	High	High
High	Master Protein	Q9R1Z7	6-pyruvoyl tetrahydrobiopterin synthase OS=Mus musculus OX=10090 GN=Pts PE=1 SV=2	31	5	Pts	0.89	0.830518	High	High	High	High	High	High	High	High	High	High
High	Master Protein	Q8BM06	Protein kinase C-binding protein NELL2 OS=Mus musculus OX=10090 GN=Nell2 PE=1 SV=1	25	6	Nell2	0.878	0.830518	High	High	High	High	High	High	High	High	High	High
High	Master Protein	Q9CQ54	NADH dehydrogenase [ubiquinone] 1 subunit C2 OS=Mus musculus OX=10090 GN=Ndufc2 PE=1 SV=1	100	8	Ndufc2	1.053	0.830518	High	High	High	High	High	High	High	High	High	High
High	Master Protein	Q8BP48	Methionine aminopeptidase 1 OS=Mus musculus OX=10090 GN=Metap1 PE=1 SV=1	3	3	Metap1	1.195	0.831109	Peak Found	Peak Found	Peak Found	High	Peak Found	High	Peak Found	High	Peak Found	Peak Found
High	Master Protein	Q61481	Calcium/calmodulin-dependent 3',5'-cyclic nucleotide phosphodiesterase 1A OS=Mus musculus OX=10090 GN=Pde1a PE=1 SV=3	134	14	Pde1a	1.055	0.831109	High	High	High	High	High	High	High	High	High	High
High	Master Protein	Q8K3C3	Protein LZIC OS=Mus musculus OX=10090 GN=Lzic PE=1 SV=1	7	4	Lzic	1.149	0.831319	Peak Found	Peak Found	Peak Found	Peak Found	High	High	High	High	Peak Found	Peak Found
High	Master Protein	Q9CZU6	Citrate synthase, mitochondrial OS=Mus musculus OX=10090 GN=Cs PE=1 SV=1	588	13	Cs	1.062	0.832279	High	High	High	High	High	High	High	High	High	High
High	Master Protein	Q9EQF6	Dihydropyrimidinase-related protein 5 OS=Mus musculus OX=10090 GN=Dpysl5 PE=1 SV=1	382	34	Dpysl5	0.94	0.832279	High	High	High	High	High	High	High	High	High	High
High	Master Protein	P27773	Protein disulfide-isomerase A3 OS=Mus musculus OX=10090 GN=Pdia3 PE=1 SV=2	472	36	Pdia3	1.062	0.832279	High	High	High	High	High	High	High	High	High	High
High	Master Protein	Q99L27	GMP reductase 2 OS=Mus musculus OX=10090 GN=Gmpr2 PE=1 SV=2	22	3	Gmpr2	0.904	0.834423	Peak Found	Peak Found	High	Peak Found	Peak Found	Peak Found	High	High	High	High
High	Master Protein	Q9CQA1	Trafficking protein particle complex subunit 5 OS=Mus musculus OX=10090 GN=Trappc5 PE=1 SV=1	20	2	Trappc5	1.141	0.835338	High	High	High	High	High	High	High	High	High	High
High	Master Protein	S4R287	Coiled-coil domain-containing protein 53 OS=Mus musculus OX=10090 GN=Washc3 PE=1 SV=1	2	2	Washc3	0.778	0.835338	High	Peak Found	Peak Found	Peak Found	Peak Found	Not Found	Not Found	Peak Found	High	Peak Found
High	Master Protein	A0A494B9B9	Succinate dehydrogenase assembly factor 2, mitochondrial OS=Mus musculus OX=10090 GN=Sdhaf2 PE=1 SV=1	5	3	Sdhaf2	1.216	0.835338	High	Peak Found	High	Peak Found	Peak Found	Peak Found	High	Peak Found	High	High
High	Master Protein	A0A0R4J0U5	ATP-binding cassette sub-family D member 2 OS=Mus musculus OX=10090 GN=Abcd2 PE=1 SV=1	7	4	Abcd2	0.853	0.835338	Peak Found	High	High	Peak Found	High	Peak Found	High	High	High	Peak Found
High	Master Protein	Q9CXF4	TBC1 domain family member 15 OS=Mus musculus OX=10090 GN=Tbc1d15 PE=1 SV=1	12	6	Tbc1d15	1.123	0.835338	Peak Found	High	High	High	High	High	High	High	High	High
High	Master Protein	Q9JKC8	AP-3 complex subunit mu-1 OS=Mus musculus OX=10090 GN=Ap3m1 PE=1 SV=1	77	8	Ap3m1	0.873	0.835338	High	High	High	High	High	High	High	High	High	High
High	Master Protein	Q6ZWX6	Eukaryotic translation initiation factor 2 subunit 1 OS=Mus musculus OX=10090 GN=Eif2s1 PE=1 SV=3	96	13	Eif2s1	0.909	0.835338	High	High	High	High	High	High	High	High	High	High
High	Master Protein	O89053	Coronin-1A OS=Mus musculus OX=10090 GN=Coro1a PE=1 SV=5	300	24	Coro1a	0.941	0.835338	High	High	High	High	High	High	High	High	High	High
High	Master Protein	Q6ZPQ6	Membrane-associated phosphatidylinositol transfer protein 2 OS=Mus musculus OX=10090 GN=Pitpnm2 PE=1 SV=2	181	32	Pitpnm2	0.922	0.835338	High	High	High	High	High	High	High	High	High	High
High	Master Protein	E9Q226	Cyclin Y-like 1 OS=Mus musculus OX=10090 GN=Ccnyl1 PE=1 SV=1	38	2	Ccnyl1	0.906	0.835665	Peak Found	High	High	High	High	High	Peak Found	High	High	High
High	Master Protein	Q9D3P8	Plasminogen receptor (KT) OS=Mus musculus OX=10090 GN=Plgrkt PE=1 SV=1	24	2	Plgrkt	1.106	0.835665	High	High	High	High	High	High	High	High	High	High
High	Master Protein	Q8BMP6	Golgi resident protein GCP60 OS=Mus musculus OX=10090 GN=Acbd3 PE=1 SV=3	19	3	Acbd3	1.126	0.835665	High	High	High	High	High	High	High	High	High	High
High	Master Protein	Q8K377	Leucine-rich repeat transmembrane neuronal protein 1 OS=Mus musculus OX=10090 GN=Lrrtm1 PE=2 SV=1	5	3	Lrrtm1	1.162	0.835665	Peak Found	Peak Found	High	High	Peak Found	Peak Found	Peak Found	High	Peak Found	High
High	Master Protein	Q8CAY6	Acetyl-CoA acetyltransferase, cytosolic OS=Mus musculus OX=10090 GN=Acat2 PE=1 SV=2	131	5	Acat2	0.922	0.835665	High	High	High	High	High	High	High	High	High	High
High	Master Protein	Q9CPS6	Histidine triad nucleotide-binding protein 3 OS=Mus musculus OX=10090 GN=Hint3 PE=1 SV=1	43	5	Hint3	0.9	0.835665	High	High	High	High	High	High	High	High	High	High
High	Master Protein	E9QK48	Echinoderm microtubule-associated protein-like 2 OS=Mus musculus OX=10090 GN=Eml2 PE=1 SV=1	53	7	Eml2	1.087	0.835665	High	High	High	High	High	High	High	High	High	High
High	Master Protein	P06745	Glucose-6-phosphate isomerase OS=Mus musculus OX=10090 GN=Gpi PE=1 SV=4	905	22	Gpi	0.941	0.836246	High	High	High	High	High	High	High	High	High	High
High	Master Protein	Q64010	Adapter molecule crk OS=Mus musculus OX=10090 GN=Crk PE=1 SV=1	114	2	Crk	0.92	0.836268	Peak Found	High	High	High	Peak Found	High	Peak Found	High	Peak Found	High
High	Master Protein	Q9Z2E9	Seipin OS=Mus musculus OX=10090 GN=Bscl2 PE=1 SV=2	4	2	Bscl2	1.226	0.838758	High	Peak Found	Peak Found	High	Peak Found	Peak Found	Peak Found	Peak Found	High	Peak Found
High	Master Protein	F6TKU5	NMDA receptor synaptonuclear-signaling and neuronal migration factor OS=Mus musculus OX=10090 GN=Nsmf PE=1 SV=1	19	6	Nsmf	1.115	0.838758	High	High	High	High	High	High	High	High	High	High
High	Master Protein	Q9D0Q7	39S ribosomal protein L45, mitochondrial OS=Mus musculus OX=10090 GN=Mrpl45 PE=1 SV=1	25	6	Mrpl45	1.119	0.838805	High	High	High	Peak Found	High	High	High	High	High	High
High	Master Protein	Q9Z2V5	Histone deacetylase 6 OS=Mus musculus OX=10090 GN=Hdac6 PE=1 SV=3	12	4	Hdac6	0.88	0.839028	Peak Found	Peak Found	Peak Found	High	Peak Found	High	High	High	High	Peak Found
High	Master Protein	Q8BXX3	GPI-anchor transamidase OS=Mus musculus OX=10090 GN=Pigk PE=1 SV=1	6	3	Pigk	0.817	0.839697	Peak Found	High	High	Peak Found	Peak Found	High	High	Peak Found	Peak Found	Peak Found
High	Master Protein	Q8VHY0	Chondroitin sulfate proteoglycan 4 OS=Mus musculus OX=10090 GN=Cspg4 PE=1 SV=3	36	13	Cspg4	0.905	0.839697	High	Peak Found	High	High	High	High	High	High	High	High
High	Master Protein	F7BX42	Neuronal pentraxin receptor OS=Mus musculus OX=10090 GN=Nptxr PE=1 SV=1	120	16	Nptxr	0.92	0.839697	High	High	High	High	High	High	High	High	High	High
High	Master Protein	D3Z7F5	NACHT, LRR and PYD domains-containing protein 9A OS=Mus musculus OX=10090 GN=Nlrp9a PE=3 SV=1	3	2	Nlrp9a	0.901	0.840195	Peak Found	High	Peak Found	High	Peak Found	Peak Found	Peak Found	Peak Found	Peak Found	High
High	Master Protein	A0A087WPF8	Protein ABHD14B (Fragment) OS=Mus musculus OX=10090 GN=Abhd14b PE=1 SV=1	13	3	Abhd14b	0.877	0.840195	High	High	High	High	High	High	High	High	High	High
High	Master Protein	Q8CGM2	Retinitis pigmentosa 1-like 1 protein OS=Mus musculus OX=10090 GN=Rp1l1 PE=1 SV=1	7	3	Rp1l1	1.142	0.840195	Peak Found	High	Peak Found	High	High	Peak Found	Peak Found	Peak Found	Peak Found	High
High	Master Protein	Q8BVU5	ADP-ribose pyrophosphatase, mitochondrial OS=Mus musculus OX=10090 GN=Nudt9 PE=1 SV=1	11	5	Nudt9	0.895	0.840195	Peak Found	High	High	High	Peak Found	High	High	High	High	Peak Found
High	Master Protein	Q6IRU2	Tropomyosin alpha-4 chain OS=Mus musculus OX=10090 GN=Tpm4 PE=1 SV=3	56	6	Tpm4	1.089	0.840195	High	High	High	High	High	High	High	High	High	High
High	Master Protein	Q3ULD5	Methylcrotonoyl-CoA carboxylase beta chain, mitochondrial OS=Mus musculus OX=10090 GN=Mccc2 PE=1 SV=1	107	20	Mccc2	1.058	0.840195	High	High	High	High	High	High	High	High	High	High
High	Master Protein	Q8R0J7	Vacuolar protein sorting-associated protein 37B OS=Mus musculus OX=10090 GN=Vps37b PE=1 SV=1	12	2	Vps37b	0.854	0.84376	High	High	High	High	High	High	High	High	High	High
High	Master Protein	Q8K4R4	Cytoplasmic phosphatidylinositol transfer protein 1 OS=Mus musculus OX=10090 GN=Pitpnc1 PE=1 SV=1	84	10	Pitpnc1	0.905	0.843901	High	High	High	High	High	High	High	High	High	High
High	Master Protein	Q9JKS5	Intracellular hyaluronan-binding protein 4 OS=Mus musculus OX=10090 GN=Habp4 PE=1 SV=2	50	10	Habp4	0.904	0.84488	High	High	High	High	High	High	High	High	High	High
High	Master Protein	Q8BXK8	Arf-GAP with GTPase, ANK repeat and PH domain-containing protein 1 OS=Mus musculus OX=10090 GN=Agap1 PE=1 SV=1	42	6	Agap1	0.884	0.847325	High	High	High	High	High	High	High	High	High	High
High	Master Protein	Q80VP1	Epsin-1 OS=Mus musculus OX=10090 GN=Epn1 PE=1 SV=3	175	14	Epn1	0.932	0.847637	High	High	High	High	High	High	High	High	High	High
High	Master Protein	Q8BLY3	Leucine-rich repeat and fibronectin type-III domain-containing protein 3 OS=Mus musculus OX=10090 GN=Lrfn3 PE=1 SV=1	8	2	Lrfn3	1.211	0.847926	High	High	High	Peak Found	High	High	High	Peak Found	High	High
High	Master Protein	A0A0R4J0B6	ATP-binding cassette sub-family G member 2 OS=Mus musculus OX=10090 GN=Abcg2 PE=1 SV=1	13	3	Abcg2	1.079	0.847926	High	High	Peak Found	Peak Found	High	High	High	High	High	High
High	Master Protein	O89086	RNA-binding protein 3 OS=Mus musculus OX=10090 GN=Rbm3 PE=1 SV=1	30	4	Rbm3	0.882	0.847926	High	High	High	High	High	High	High	High	High	High
High	Master Protein	O35344	Importin subunit alpha-4 OS=Mus musculus OX=10090 GN=Kpna3 PE=1 SV=1	56	5	Kpna3	0.907	0.847926	High	High	High	High	High	High	High	High	High	High
High	Master Protein	B1AS29	Glutamate receptor ionotropic, kainate 3 OS=Mus musculus OX=10090 GN=Grik3 PE=1 SV=1	17	5	Grik3	1.109	0.847926	High	High	High	High	High	High	High	Peak Found	High	Peak Found
High	Master Protein	P30416	Peptidyl-prolyl cis-trans isomerase FKBP4 OS=Mus musculus OX=10090 GN=Fkbp4 PE=1 SV=5	122	14	Fkbp4	0.918	0.847926	High	High	High	High	High	High	High	High	High	High
High	Master Protein	Q9Z268	RasGAP-activating-like protein 1 OS=Mus musculus OX=10090 GN=Rasal1 PE=1 SV=2	307	35	Rasal1	0.942	0.847926	High	High	High	High	High	High	High	High	High	High
High	Master Protein	A0A0R4J078	UBX domain-containing protein 4 OS=Mus musculus OX=10090 GN=Ubxn4 PE=1 SV=1	10	4	Ubxn4	0.905	0.848102	High	High	High	High	Peak Found	High	High	High	Peak Found	Peak Found
High	Master Protein	E9Q9M1	Cytosolic purine 5'-nucleotidase OS=Mus musculus OX=10090 GN=Nt5c2 PE=1 SV=1	34	7	Nt5c2	0.889	0.848102	High	High	High	High	High	High	High	High	High	High
High	Master Protein	A0A1C7ZMY3	SH3 and multiple ankyrin repeat domains protein 2 OS=Mus musculus OX=10090 GN=Shank2 PE=1 SV=1	470	2	Shank2	1.091	0.84823	High	High	High	Peak Found	Peak Found	High	High	High	High	High
High	Master Protein	A0A2R8W6P0	Integrin-associated protein OS=Mus musculus OX=10090 GN=Cd47 PE=1 SV=1	126	2	Cd47	1.06	0.84823	High	High	High	High	High	High	High	High	High	High
High	Master Protein	Q8CC27	Voltage-dependent L-type calcium channel subunit beta-2 OS=Mus musculus OX=10090 GN=Cacnb2 PE=1 SV=1	39	2	Cacnb2	1.278	0.84823	Peak Found	Peak Found	Peak Found	High	Peak Found	High	Peak Found	Peak Found	Peak Found	Peak Found
High	Master Protein	P70425	GTP-binding protein Rit2 OS=Mus musculus OX=10090 GN=Rit2 PE=1 SV=1	6	2	Rit2	0.804	0.84823	High	High	Peak Found	Peak Found	Peak Found	High	Peak Found	High	High	High
High	Master Protein	Q569Z6	Thyroid hormone receptor-associated protein 3 OS=Mus musculus OX=10090 GN=Thrap3 PE=1 SV=1	2	2	Thrap3	1.283	0.84823	Peak Found	Peak Found	Peak Found	Peak Found	High	High	Peak Found	Peak Found	Peak Found	Peak Found
High	Master Protein	P61961	Ubiquitin-fold modifier 1 OS=Mus musculus OX=10090 GN=Ufm1 PE=1 SV=1	28	3	Ufm1	1.069	0.84823	High	High	High	High	High	High	High	High	High	High
High	Master Protein	Q9WTR6	Cystine/glutamate transporter OS=Mus musculus OX=10090 GN=Slc7a11 PE=1 SV=1	33	3	Slc7a11	0.882	0.84823	High	High	High	High	High	High	High	High	High	High
High	Master Protein	Q8CEI3	Coiled-coil domain-containing 28A OS=Mus musculus OX=10090 GN=Ccdc28a PE=1 SV=1	22	4	Ccdc28a	0.875	0.84823	High	High	High	High	High	High	High	High	High	High
High	Master Protein	D3YTT6	Oxysterol-binding protein OS=Mus musculus OX=10090 GN=Osbpl3 PE=1 SV=1	5	5	Osbpl3	0.906	0.84823	High	Peak Found	High	Peak Found	Peak Found	Peak Found	High	Peak Found	High	Peak Found
High	Master Protein	D3YU12	NmrA-like family domain-containing protein 1 OS=Mus musculus OX=10090 GN=Nmral1 PE=1 SV=1	34	5	Nmral1	0.906	0.84823	High	High	High	High	High	High	High	High	High	High
High	Master Protein	Q8VD62	UPF0696 protein C11orf68 homolog OS=Mus musculus OX=10090 GN=Bles03 PE=1 SV=2	18	5	Bles03	0.885	0.84823	High	High	Peak Found	High	High	High	High	High	High	High
High	Master Protein	S4R2T7	Ankyrin-2 (Fragment) OS=Mus musculus OX=10090 GN=Ank2 PE=1 SV=2	956	6	Ank2	1.046	0.84823	High	High	High	High	High	High	High	High	High	High
High	Master Protein	Q91XD6	Vacuolar protein-sorting-associated protein 36 OS=Mus musculus OX=10090 GN=Vps36 PE=1 SV=1	32	6	Vps36	0.906	0.84823	High	High	High	High	High	High	High	High	High	High
High	Master Protein	Q9DBS1	Transmembrane protein 43 OS=Mus musculus OX=10090 GN=Tmem43 PE=1 SV=1	32	8	Tmem43	1.084	0.84823	High	High	High	High	High	High	High	High	High	High
High	Master Protein	Q9CQ60	6-phosphogluconolactonase OS=Mus musculus OX=10090 GN=Pgls PE=1 SV=1	96	10	Pgls	0.908	0.84823	High	High	High	High	High	High	High	High	High	High
High	Master Protein	Q8VDZ4	Palmitoyltransferase ZDHHC5 OS=Mus musculus OX=10090 GN=Zdhhc5 PE=1 SV=1	60	11	Zdhhc5	1.076	0.84823	High	High	High	High	High	High	High	High	High	High
High	Master Protein	A0A0G2JFB2	Tudor and KH domain-containing protein OS=Mus musculus OX=10090 GN=Tdrkh PE=1 SV=1	72	11	Tdrkh	1.076	0.84823	High	High	High	High	High	High	High	High	High	High
High	Master Protein	Q8JZN5	Complex I assembly factor ACAD9, mitochondrial OS=Mus musculus OX=10090 GN=Acad9 PE=1 SV=2	198	31	Acad9	1.05	0.84823	High	High	High	High	High	High	High	High	High	High
High	Master Protein	Q9EQI8	39S ribosomal protein L46, mitochondrial OS=Mus musculus OX=10090 GN=Mrpl46 PE=1 SV=1	23	7	Mrpl46	1.099	0.848595	High	High	High	High	High	High	High	High	High	Peak Found
High	Master Protein	G5E8R4	Serine/threonine-protein phosphatase 6 regulatory subunit 3 OS=Mus musculus OX=10090 GN=Ppp6r3 PE=1 SV=1	86	15	Ppp6r3	1.059	0.848595	High	High	High	High	High	High	High	High	High	High
High	Master Protein	Q3TN85	UV excision repair protein RAD23 homolog A (Fragment) OS=Mus musculus OX=10090 GN=Rad23a PE=1 SV=1	22	4	Rad23a	1.1	0.849156	High	Peak Found	Peak Found	Peak Found	Peak Found	High	High	High	High	High
High	Master Protein	Q80Z38	SH3 and multiple ankyrin repeat domains protein 2 OS=Mus musculus OX=10090 GN=Shank2 PE=1 SV=2	485	5	Shank2	1.06	0.849156	High	High	High	High	High	High	High	Peak Found	High	Peak Found
High	Master Protein	Q6P1J1	Crmp1 protein OS=Mus musculus OX=10090 GN=Crmp1 PE=1 SV=1	923	6	Crmp1	0.942	0.849156	High	High	High	High	High	High	High	High	High	High
High	Master Protein	Q80X80	Phospholipid transfer protein C2CD2L OS=Mus musculus OX=10090 GN=C2cd2l PE=1 SV=3	197	23	C2cd2l	0.931	0.849156	High	High	High	High	High	High	High	High	High	High
High	Master Protein	F6QYT9	Kalirin (Fragment) OS=Mus musculus OX=10090 GN=Kalrn PE=1 SV=1	237	24	Kalrn	1.047	0.849156	High	High	High	High	High	High	High	High	High	High
High	Master Protein	O35969	Guanidinoacetate N-methyltransferase OS=Mus musculus OX=10090 GN=Gamt PE=1 SV=1	11	2	Gamt	0.856	0.849246	High	High	High	High	High	High	High	High	High	High
High	Master Protein	Q6NVG1	Lysophospholipid acyltransferase LPCAT4 OS=Mus musculus OX=10090 GN=Lpcat4 PE=1 SV=1	33	7	Lpcat4	0.913	0.849286	High	High	High	High	High	High	High	High	High	High
High	Master Protein	Q8K0C9	GDP-mannose 4,6 dehydratase OS=Mus musculus OX=10090 GN=Gmds PE=1 SV=1	5	3	Gmds	0.925	0.849625	High	Peak Found	Peak Found	High	High	Peak Found	High	Peak Found	Peak Found	Peak Found
High	Master Protein	Q8R2R9	AP-3 complex subunit mu-2 OS=Mus musculus OX=10090 GN=Ap3m2 PE=1 SV=1	139	12	Ap3m2	0.925	0.849625	High	High	High	High	High	High	High	High	High	High
High	Master Protein	Q3V038	Tetratricopeptide repeat protein 9A OS=Mus musculus OX=10090 GN=Ttc9 PE=1 SV=1	10	3	Ttc9	0.86	0.850155	Peak Found	Peak Found	Peak Found	Peak Found	Peak Found	High	High	High	High	High
High	Master Protein	O55229	Choline/ethanolamine kinase OS=Mus musculus OX=10090 GN=Chkb PE=1 SV=3	26	4	Chkb	0.888	0.850155	High	High	High	Peak Found	High	High	High	High	High	High
High	Master Protein	Q9QUR6	Prolyl endopeptidase OS=Mus musculus OX=10090 GN=Prep PE=1 SV=1	157	20	Prep	0.92	0.850155	High	High	High	High	High	High	High	High	High	High
High	Master Protein	P23242	Gap junction alpha-1 protein OS=Mus musculus OX=10090 GN=Gja1 PE=1 SV=2	206	12	Gja1	0.94	0.851564	High	High	High	High	High	High	High	High	High	High
High	Master Protein	Q9WUB4	Dynactin subunit 6 OS=Mus musculus OX=10090 GN=Dctn6 PE=1 SV=1	10	2	Dctn6	0.895	0.853104	High	High	Peak Found	High	Peak Found	High	High	High	High	High
High	Master Protein	Q99JP7	Glutathione hydrolase 7 OS=Mus musculus OX=10090 GN=Ggt7 PE=1 SV=2	95	13	Ggt7	0.907	0.853154	High	High	High	High	High	High	High	High	High	High
High	Master Protein	O70252	Heme oxygenase 2 OS=Mus musculus OX=10090 GN=Hmox2 PE=1 SV=1	116	16	Hmox2	0.923	0.853278	High	High	High	High	High	High	High	High	High	High
High	Master Protein	Q99LC8	Translation initiation factor eIF-2B subunit alpha OS=Mus musculus OX=10090 GN=Eif2b1 PE=1 SV=1	5	2	Eif2b1	1.185	0.853519	High	High	Peak Found	High	Not Found	Peak Found	Peak Found	High	High	Peak Found
High	Master Protein	Q3TQG9	Zinc finger protein 607A OS=Mus musculus OX=10090 GN=Zfp607a PE=2 SV=1	2	2	Zfp607a	1.052	0.853519	Peak Found	Peak Found	Peak Found	High	High	Peak Found	Peak Found	Peak Found	Peak Found	Peak Found
High	Master Protein	P11404	Fatty acid-binding protein, heart OS=Mus musculus OX=10090 GN=Fabp3 PE=1 SV=5	105	7	Fabp3	1.055	0.853519	High	High	High	High	High	High	High	High	High	High
High	Master Protein	Q8VIM9	Immunity-related GTPase family Q protein OS=Mus musculus OX=10090 GN=Irgq PE=1 SV=1	51	9	Irgq	1.076	0.853519	High	High	High	High	High	High	High	High	High	High
High	Master Protein	Q921J2	GTP-binding protein Rheb OS=Mus musculus OX=10090 GN=Rheb PE=1 SV=1	76	9	Rheb	1.051	0.853519	High	High	High	High	High	High	High	High	High	High
High	Master Protein	O55029	Coatomer subunit beta' OS=Mus musculus OX=10090 GN=Copb2 PE=1 SV=2	41	13	Copb2	1.063	0.853519	High	High	High	High	High	High	High	High	High	High
High	Master Protein	P97494	Glutamate--cysteine ligase catalytic subunit OS=Mus musculus OX=10090 GN=Gclc PE=1 SV=4	59	14	Gclc	0.91	0.853519	High	High	High	High	High	High	High	High	High	High
High	Master Protein	A0A0N4SVB5	Proline-rich transmembrane protein 3 OS=Mus musculus OX=10090 GN=Prrt3 PE=1 SV=1	153	17	Prrt3	1.047	0.853519	High	High	High	High	High	High	High	High	High	High
High	Master Protein	Q9Z2I0	Mitochondrial proton/calcium exchanger protein OS=Mus musculus OX=10090 GN=Letm1 PE=1 SV=1	308	31	Letm1	1.059	0.853519	High	High	High	High	High	High	High	High	High	High
High	Master Protein	Q920Q6	RNA-binding protein Musashi homolog 2 OS=Mus musculus OX=10090 GN=Msi2 PE=1 SV=1	12	3	Msi2	1.115	0.853622	High	High	Peak Found	High	High	Peak Found	High	High	Peak Found	High
High	Master Protein	Q6XPS7	L-threonine aldolase OS=Mus musculus OX=10090 GN=Tha1 PE=1 SV=1	6	3	Tha1	1.196	0.853644	Peak Found	High	High	Peak Found	High	Peak Found	High	Peak Found	High	Peak Found
High	Master Protein	A0A0R4J0T9	Neuronal tyrosine-phosphorylated phosphoinositide-3-kinase adapter 2 OS=Mus musculus OX=10090 GN=Nyap2 PE=1 SV=1	29	8	Nyap2	1.098	0.853644	High	High	High	High	High	High	High	High	High	High
High	Master Protein	E9PUQ5	Golgin subfamily A member 2 OS=Mus musculus OX=10090 GN=Golga2 PE=1 SV=1	29	10	Golga2	1.076	0.853644	High	High	High	High	High	High	High	High	High	High
High	Master Protein	Q99LX0	Parkinson disease protein 7 homolog OS=Mus musculus OX=10090 GN=Park7 PE=1 SV=1	276	12	Park7	0.943	0.853644	High	High	High	High	High	High	High	High	High	High
High	Master Protein	P70168	Importin subunit beta-1 OS=Mus musculus OX=10090 GN=Kpnb1 PE=1 SV=2	324	34	Kpnb1	0.943	0.853644	High	High	High	High	High	High	High	High	High	High
High	Master Protein	Q9WUA3	ATP-dependent 6-phosphofructokinase, platelet type OS=Mus musculus OX=10090 GN=Pfkp PE=1 SV=1	508	38	Pfkp	0.943	0.853644	High	High	High	High	High	High	High	High	High	High
High	Master Protein	Q9D9E0	Solute carrier family 22 member 17 OS=Mus musculus OX=10090 GN=Slc22a17 PE=2 SV=2	7	3	Slc22a17	1.126	0.853766	Peak Found	Peak Found	Peak Found	High	High	High	Peak Found	High	High	Peak Found
High	Master Protein	Q56A07	Sodium channel subunit beta-2 OS=Mus musculus OX=10090 GN=Scn2b PE=1 SV=1	103	9	Scn2b	1.051	0.854898	High	High	High	High	High	High	High	High	High	High
High	Master Protein	Q9CQH3	NADH dehydrogenase [ubiquinone] 1 beta subcomplex subunit 5, mitochondrial OS=Mus musculus OX=10090 GN=Ndufb5 PE=1 SV=1	117	6	Ndufb5	1.048	0.85508	High	High	High	High	High	High	High	High	High	High
High	Master Protein	Q60676	Serine/threonine-protein phosphatase 5 OS=Mus musculus OX=10090 GN=Ppp5c PE=1 SV=3	200	20	Ppp5c	0.926	0.85508	High	High	High	High	High	High	High	High	High	High
High	Master Protein	P05201	Aspartate aminotransferase, cytoplasmic OS=Mus musculus OX=10090 GN=Got1 PE=1 SV=3	556	31	Got1	0.943	0.85508	High	High	High	High	High	High	High	High	High	High
High	Master Protein	P58064	28S ribosomal protein S6, mitochondrial OS=Mus musculus OX=10090 GN=Mrps6 PE=1 SV=3	28	3	Mrps6	1.112	0.855778	High	High	High	High	High	Peak Found	High	High	High	High
High	Master Protein	Q8K3H0	DCC-interacting protein 13-alpha OS=Mus musculus OX=10090 GN=Appl1 PE=1 SV=1	133	27	Appl1	0.925	0.855778	High	High	High	High	High	High	High	High	High	High
High	Master Protein	P27659	60S ribosomal protein L3 OS=Mus musculus OX=10090 GN=Rpl3 PE=1 SV=3	135	13	Rpl3	0.926	0.856351	High	High	High	High	High	High	High	High	High	High
High	Master Protein	Q8BG73	SH3 domain-binding glutamic acid-rich-like protein 2 OS=Mus musculus OX=10090 GN=Sh3bgrl2 PE=1 SV=1	12	3	Sh3bgrl2	0.879	0.857777	Peak Found	High	High	Peak Found	Peak Found	High	High	High	High	High
High	Master Protein	P28028	Serine/threonine-protein kinase B-raf OS=Mus musculus OX=10090 GN=Braf PE=1 SV=3	72	9		1.052	0.857777	High	High	High	High	High	High	High	High	High	High
High	Master Protein	Q8CH72	E3 ubiquitin-protein ligase TRIM32 OS=Mus musculus OX=10090 GN=Trim32 PE=1 SV=2	51	12	Trim32	1.061	0.857777	High	High	High	High	High	High	High	High	High	High
High	Master Protein	P63024	Vesicle-associated membrane protein 3 OS=Mus musculus OX=10090 GN=Vamp3 PE=1 SV=1	135	3	Vamp3	0.885	0.858581	High	High	High	High	High	High	High	High	High	High
High	Master Protein	Q8C5W0	Calmin OS=Mus musculus OX=10090 GN=Clmn PE=1 SV=2	22	5	Clmn	0.862	0.858581	High	High	High	High	High	High	High	High	High	High
High	Master Protein	Q61335	B-cell receptor-associated protein 31 OS=Mus musculus OX=10090 GN=Bcap31 PE=1 SV=4	54	8	Bcap31	0.911	0.858581	High	High	High	High	High	High	High	High	High	High
High	Master Protein	Q99M31	Heat shock 70 kDa protein 14 OS=Mus musculus OX=10090 GN=Hspa14 PE=1 SV=2	3	2	Hspa14	0.805	0.859164	Not Found	High	Peak Found	Peak Found	Peak Found	High	Peak Found	High	Peak Found	Peak Found
High	Master Protein	A2AVR9	Dynein light chain roadblock OS=Mus musculus OX=10090 GN=Dynlrb1 PE=1 SV=1	66	5	Dynlrb1	1.048	0.859164	High	High	High	High	High	High	High	High	High	High
High	Master Protein	Q9DB50	AP-1 complex subunit sigma-2 OS=Mus musculus OX=10090 GN=Ap1s2 PE=1 SV=1	13	2	Ap1s2	1.114	0.859235	High	High	High	High	High	Peak Found	High	Peak Found	Peak Found	High
High	Master Protein	D3Z7X0	Acyl-Coenzyme A dehydrogenase family, member 12 OS=Mus musculus OX=10090 GN=Acad12 PE=1 SV=1	2	2	Acad12	1.253	0.859235	High	Peak Found	Peak Found	Peak Found	Peak Found	High	Peak Found	Peak Found	Peak Found	Peak Found
High	Master Protein	Q7TMG8	Glioblastoma amplified sequence OS=Mus musculus OX=10090 GN=Nipsnap2 PE=1 SV=1	105	9	Nipsnap2	1.047	0.859458	High	High	High	High	High	High	High	High	High	High
High	Master Protein	P97352	Protein S100-A13 OS=Mus musculus OX=10090 GN=S100a13 PE=1 SV=1	40	5	S100a13	1.055	0.859605	High	High	High	High	High	High	High	High	High	High
High	Master Protein	Q99PL6	UBX domain-containing protein 6 OS=Mus musculus OX=10090 GN=Ubxn6 PE=1 SV=1	164	16	Ubxn6	0.931	0.859605	High	High	High	High	High	High	High	High	High	High
High	Master Protein	P15105	Glutamine synthetase OS=Mus musculus OX=10090 GN=Glul PE=1 SV=6	779	20	Glul	0.944	0.859605	High	High	High	High	High	High	High	High	High	High
High	Master Protein	O35988	Syndecan-4 OS=Mus musculus OX=10090 GN=Sdc4 PE=1 SV=1	9	2	Sdc4	1.117	0.859759	High	High	High	High	High	Peak Found	Peak Found	Peak Found	High	High
High	Master Protein	Q9DCB4	cAMP-regulated phosphoprotein 21 OS=Mus musculus OX=10090 GN=Arpp21 PE=1 SV=2	17	3	Arpp21	1.076	0.859759	Peak Found	High	High	High	High	High	Peak Found	Peak Found	High	High
High	Master Protein	D3YUZ8	Disks large homolog 2 OS=Mus musculus OX=10090 GN=Dlg2 PE=1 SV=1	493	2	Dlg2	1.158	0.859946	High	High	Not Found	Peak Found	High	Not Found	Not Found	High	Peak Found	High
High	Master Protein	P62267	40S ribosomal protein S23 OS=Mus musculus OX=10090 GN=Rps23 PE=1 SV=3	15	2	Rps23	1.106	0.859946	High	Peak Found	High	High	High	High	High	High	High	High
High	Master Protein	O35609	Secretory carrier-associated membrane protein 3 OS=Mus musculus OX=10090 GN=Scamp3 PE=1 SV=3	75	5	Scamp3	1.053	0.860039	High	High	High	High	High	High	High	High	High	High
High	Master Protein	Q3UHD2	Glucose-fructose oxidoreductase domain-containing protein 1 OS=Mus musculus OX=10090 GN=Gfod1 PE=1 SV=1	17	5	Gfod1	0.921	0.860039	High	High	High	High	High	Peak Found	High	High	High	High
High	Master Protein	Q8C3W1	Uncharacterized protein C1orf198 homolog OS=Mus musculus OX=10090 PE=1 SV=1	66	11		0.907	0.860039	High	High	High	High	High	High	High	High	High	High
High	Master Protein	Q80YX1	Tenascin OS=Mus musculus OX=10090 GN=Tnc PE=1 SV=1	39	13	Tnc	0.906	0.860039	High	High	High	High	High	High	High	High	High	High
High	Master Protein	Q8C3Q5	Protein shisa-7 OS=Mus musculus OX=10090 GN=Shisa7 PE=1 SV=3	67	14	Shisa7	1.06	0.860039	High	High	High	High	High	High	High	High	High	High
High	Master Protein	E9Q2S0	Protocadherin 7 OS=Mus musculus OX=10090 GN=Pcdh7 PE=1 SV=2	66	13	Pcdh7	1.072	0.860121	High	High	High	High	High	High	High	High	High	High
High	Master Protein	Q99JY0	Trifunctional enzyme subunit beta, mitochondrial OS=Mus musculus OX=10090 GN=Hadhb PE=1 SV=1	205	25	Hadhb	1.054	0.86028	High	High	High	High	High	High	High	High	High	High
High	Master Protein	F6SQH7	Polymerase delta-interacting protein 2 (Fragment) OS=Mus musculus OX=10090 GN=Poldip2 PE=1 SV=1	14	5	Poldip2	1.114	0.860346	High	High	High	High	High	Peak Found	High	High	High	High
High	Master Protein	P63147	Ubiquitin-conjugating enzyme E2 B OS=Mus musculus OX=10090 GN=Ube2b PE=1 SV=1	17	2	Ube2b	0.856	0.861117	High	High	High	High	High	High	High	High	High	High
High	Master Protein	Q9D9V3	Ethylmalonyl-CoA decarboxylase OS=Mus musculus OX=10090 GN=Echdc1 PE=1 SV=2	14	3	Echdc1	1.114	0.862309	Peak Found	High	High	High	Peak Found	High	Peak Found	High	High	High
High	Master Protein	Q3UQ84	Threonine--tRNA ligase, mitochondrial OS=Mus musculus OX=10090 GN=Tars2 PE=1 SV=1	11	5	Tars2	1.112	0.862309	High	High	High	High	Peak Found	High	Peak Found	High	High	High
High	Master Protein	P23116	Eukaryotic translation initiation factor 3 subunit A OS=Mus musculus OX=10090 GN=Eif3a PE=1 SV=5	87	24	Eif3a	0.91	0.862309	High	High	High	High	High	High	High	High	High	High
High	Master Protein	Q6PB66	Leucine-rich PPR motif-containing protein, mitochondrial OS=Mus musculus OX=10090 GN=Lrpprc PE=1 SV=2	443	59	Lrpprc	1.058	0.862309	High	High	High	High	High	High	High	High	High	High
High	Master Protein	Q9WU79	Proline dehydrogenase 1, mitochondrial OS=Mus musculus OX=10090 GN=Prodh PE=1 SV=2	41	11	Prodh	1.073	0.862482	High	High	High	High	High	High	High	High	High	High
High	Master Protein	H7BX46	Rho GTPase-activating protein 39 OS=Mus musculus OX=10090 GN=Arhgap39 PE=1 SV=1	93	19	Arhgap39	1.062	0.862482	High	High	High	High	High	High	High	High	High	High
High	Master Protein	Q9QUH0	Glutaredoxin-1 OS=Mus musculus OX=10090 GN=Glrx PE=1 SV=3	102	5	Glrx	1.047	0.862788	High	High	High	High	High	High	High	High	High	High
High	Master Protein	Q9CRC9	Glucosamine-6-phosphate isomerase 2 OS=Mus musculus OX=10090 GN=Gnpda2 PE=1 SV=1	26	4	Gnpda2	0.892	0.864257	High	High	High	High	High	High	High	High	High	High
High	Master Protein	Q9CPR5	39S ribosomal protein L15, mitochondrial OS=Mus musculus OX=10090 GN=Mrpl15 PE=1 SV=1	23	6	Mrpl15	1.078	0.864257	High	High	High	High	High	High	High	High	High	High
High	Master Protein	Q99M51	Cytoplasmic protein NCK1 OS=Mus musculus OX=10090 GN=Nck1 PE=1 SV=1	28	6	Nck1	0.888	0.864595	Peak Found	High	High	High	Peak Found	High	High	High	High	High
High	Master Protein	Q8BIW1	Exopolyphosphatase PRUNE1 OS=Mus musculus OX=10090 GN=Prune1 PE=1 SV=1	87	15	Prune1	1.046	0.864595	High	High	High	High	High	High	High	High	High	High
High	Master Protein	Q9D2M8	Ubiquitin-conjugating enzyme E2 variant 2 OS=Mus musculus OX=10090 GN=Ube2v2 PE=1 SV=4	197	3	Ube2v2	0.939	0.864753	High	High	High	High	High	High	High	High	High	High
High	Master Protein	Q9D0R8	Protein LSM12 homolog OS=Mus musculus OX=10090 GN=Lsm12 PE=1 SV=1	11	2	Lsm12	1.128	0.865091	Peak Found	Peak Found	High	Peak Found	High	High	High	High	High	High
High	Master Protein	Q6P3A8	2-oxoisovalerate dehydrogenase subunit beta, mitochondrial OS=Mus musculus OX=10090 GN=Bckdhb PE=1 SV=2	46	6	Bckdhb	1.067	0.865283	High	High	High	High	High	High	High	High	High	High
High	Master Protein	A2AHG0	Leucine zipper putative tumor suppressor 3 OS=Mus musculus OX=10090 GN=Lzts3 PE=1 SV=1	37	10	Lzts3	1.077	0.865827	High	High	High	High	High	High	High	High	High	High
High	Master Protein	P97384	Annexin A11 OS=Mus musculus OX=10090 GN=Anxa11 PE=1 SV=2	80	12	Anxa11	1.059	0.866748	High	High	High	High	High	High	High	High	High	High
High	Master Protein	Q8BMI3	ADP-ribosylation factor-binding protein GGA3 OS=Mus musculus OX=10090 GN=Gga3 PE=1 SV=2	92	16	Gga3	0.909	0.866749	High	High	High	High	High	High	High	High	High	High
High	Master Protein	E9Q447	Spectrin alpha chain, non-erythrocytic 1 OS=Mus musculus OX=10090 GN=Sptan1 PE=1 SV=1	3677	2	Sptan1	1.077	0.866897	High	High	High	High	High	High	High	High	High	High
High	Master Protein	A0A0R4J107	Acyl-peptide hydrolase (Fragment) OS=Mus musculus OX=10090 GN=Apeh PE=1 SV=1	9	3	Apeh	0.884	0.867661	High	High	High	High	High	Peak Found	High	Peak Found	Peak Found	Peak Found
High	Master Protein	O88967	ATP-dependent zinc metalloprotease YME1L1 OS=Mus musculus OX=10090 GN=Yme1l1 PE=1 SV=1	29	9	Yme1l1	1.095	0.867661	High	High	High	High	High	High	High	High	High	High
High	Master Protein	Q61584	Fragile X mental retardation syndrome-related protein 1 OS=Mus musculus OX=10090 GN=Fxr1 PE=1 SV=2	38	6	Fxr1	0.887	0.868367	High	High	High	High	High	High	High	High	High	High
High	Master Protein	Q149F3	Eukaryotic peptide chain release factor GTP-binding subunit ERF3B OS=Mus musculus OX=10090 GN=Gspt2 PE=1 SV=1	55	3	Gspt2	0.86	0.868602	High	High	High	High	High	High	High	High	High	High
High	Master Protein	P53996	Cellular nucleic acid-binding protein OS=Mus musculus OX=10090 GN=Cnbp PE=1 SV=2	26	2	Cnbp	0.911	0.868747	Peak Found	High	High	High	High	High	High	High	High	High
High	Master Protein	P60670	Nuclear protein localization protein 4 homolog OS=Mus musculus OX=10090 GN=Nploc4 PE=1 SV=3	35	8	Nploc4	0.91	0.869284	High	High	High	High	High	High	High	High	High	High
High	Master Protein	A0A1W2P872	NOVA alternative-splicing regulator 2 OS=Mus musculus OX=10090 GN=Nova2 PE=1 SV=1	46	3	Nova2	0.91	0.870221	High	High	High	High	High	Peak Found	High	High	High	High
High	Master Protein	Q9R1T2	SUMO-activating enzyme subunit 1 OS=Mus musculus OX=10090 GN=Sae1 PE=1 SV=1	9	3	Sae1	0.857	0.870221	Peak Found	High	High	Peak Found	Peak Found	High	High	High	High	Peak Found
High	Master Protein	R4H4V1	N-terminal kinase-like protein OS=Mus musculus OX=10090 GN=Scyl1 PE=1 SV=1	28	9	Scyl1	0.902	0.870221	High	High	High	High	High	High	High	High	High	High
High	Master Protein	Q9R118	Serine protease HTRA1 OS=Mus musculus OX=10090 GN=Htra1 PE=1 SV=2	10	4	Htra1	1.076	0.871711	High	High	Peak Found	High	High	Peak Found	High	Peak Found	Peak Found	High
High	Master Protein	F8WJK8	Hsc70-interacting protein OS=Mus musculus OX=10090 GN=St13 PE=1 SV=1	133	12	St13	0.934	0.871711	High	High	High	High	High	High	High	High	High	High
High	Master Protein	Q80U40	RIMS-binding protein 2 OS=Mus musculus OX=10090 GN=Rimbp2 PE=1 SV=3	87	2	Rimbp2	1.044	0.871756	High	High	High	High	High	High	High	High	High	High
High	Master Protein	Q922E6	FAST kinase domain-containing protein 2, mitochondrial OS=Mus musculus OX=10090 GN=Fastkd2 PE=2 SV=2	4	2	Fastkd2	1.203	0.871756	Peak Found	Peak Found	High	Peak Found	High	High	High	Peak Found	Peak Found	Not Found
High	Master Protein	Q61074	Protein phosphatase 1G OS=Mus musculus OX=10090 GN=Ppm1g PE=1 SV=3	3	2	Ppm1g	0.85	0.871756	Peak Found	High	Peak Found	Peak Found	Peak Found	Peak Found	High	Peak Found	High	Peak Found
High	Master Protein	Q9JIG8	PRA1 family protein 2 OS=Mus musculus OX=10090 GN=Praf2 PE=1 SV=1	33	5	Praf2	1.06	0.871756	High	High	High	High	High	High	High	High	High	High
High	Master Protein	Q7TQI3	Ubiquitin thioesterase OTUB1 OS=Mus musculus OX=10090 GN=Otub1 PE=1 SV=2	217	11	Otub1	0.937	0.871756	High	High	High	High	High	High	High	High	High	High
High	Master Protein	Q9ERG2	Striatin-3 OS=Mus musculus OX=10090 GN=Strn3 PE=1 SV=1	124	2	Strn3	1.045	0.871872	High	Peak Found	Peak Found	High	Not Found	Not Found	High	High	Peak Found	Peak Found
High	Master Protein	Q3UK02	39S ribosomal protein L9, mitochondrial OS=Mus musculus OX=10090 GN=Mrpl9 PE=1 SV=1	3	2	Mrpl9	1.141	0.871957	Peak Found	Peak Found	High	Peak Found	High	Peak Found	Peak Found	High	Peak Found	Peak Found
High	Master Protein	Q9EQ08	Heparan N-sulfatase OS=Mus musculus OX=10090 GN=Sgsh PE=1 SV=1	3	2	Sgsh	1.247	0.871957	Peak Found	High	Peak Found	Peak Found	Peak Found	High	Not Found	Peak Found	High	Peak Found
High	Master Protein	O08583	THO complex subunit 4 OS=Mus musculus OX=10090 GN=Alyref PE=1 SV=3	24	4	Alyref	1.108	0.871957	High	High	High	High	High	High	High	High	High	High
High	Master Protein	Q8BMS4	Ubiquinone biosynthesis O-methyltransferase, mitochondrial OS=Mus musculus OX=10090 GN=Coq3 PE=1 SV=1	21	4	Coq3	1.109	0.871957	High	High	High	High	High	High	High	High	High	High
High	Master Protein	Q8VE47	Ubiquitin-like modifier-activating enzyme 5 OS=Mus musculus OX=10090 GN=Uba5 PE=1 SV=2	60	6	Uba5	0.91	0.871957	High	High	High	High	High	High	High	High	High	High
High	Master Protein	Q9DC07	LIM zinc-binding domain-containing Nebulette OS=Mus musculus OX=10090 GN=Nebl PE=1 SV=1	71	8	Nebl	1.047	0.872197	High	High	High	High	High	High	High	High	High	High
High	Master Protein	Q05816	Fatty acid-binding protein 5 OS=Mus musculus OX=10090 GN=Fabp5 PE=1 SV=3	190	10	Fabp5	0.944	0.872197	High	High	High	High	High	High	High	High	High	High
High	Master Protein	Q9D8B6	Protein FAM210B, mitochondrial OS=Mus musculus OX=10090 GN=Fam210b PE=1 SV=3	7	2	Fam210b	1.105	0.87244	High	High	Peak Found	Peak Found	Peak Found	High	Peak Found	Peak Found	Peak Found	High
High	Master Protein	Q7M759	Alpha/beta hydrolase domain-containing protein 17B OS=Mus musculus OX=10090 GN=Abhd17b PE=1 SV=1	12	5	Abhd17b	0.859	0.87244	High	High	High	Peak Found	High	High	High	High	High	High
High	Master Protein	Q9WTL7	Acyl-protein thioesterase 2 OS=Mus musculus OX=10090 GN=Lypla2 PE=1 SV=1	54	8	Lypla2	0.913	0.87244	High	High	High	High	High	High	High	High	High	High
High	Master Protein	P45591	Cofilin-2 OS=Mus musculus OX=10090 GN=Cfl2 PE=1 SV=1	97	9	Cfl2	1.056	0.87244	High	High	High	High	High	High	High	High	High	High
High	Master Protein	Q6PHZ8	Kv channel-interacting protein 4 OS=Mus musculus OX=10090 GN=Kcnip4 PE=1 SV=1	79	2	Kcnip4	1.058	0.87274	Peak Found	High	High	Peak Found	Peak Found	Peak Found	Peak Found	Peak Found	Peak Found	Peak Found
High	Master Protein	Q8BIG7	Catechol O-methyltransferase domain-containing protein 1 OS=Mus musculus OX=10090 GN=Comtd1 PE=1 SV=1	111	10	Comtd1	1.046	0.87274	High	High	High	High	High	High	High	High	High	High
High	Master Protein	A0A0A6YVR9	SURF1-like protein (Fragment) OS=Mus musculus OX=10090 GN=Surf1 PE=1 SV=1	17	4	Surf1	1.118	0.872907	High	High	High	High	High	Peak Found	High	High	High	High
High	Master Protein	Q9Z2M7	Phosphomannomutase 2 OS=Mus musculus OX=10090 GN=Pmm2 PE=1 SV=1	37	4	Pmm2	1.098	0.87298	High	High	High	High	High	High	High	High	High	High
High	Master Protein	P03911	NADH-ubiquinone oxidoreductase chain 4 OS=Mus musculus OX=10090 GN=Mtnd4 PE=1 SV=1	67	7	Mtnd4	0.912	0.873294	High	High	High	High	High	High	High	High	High	High
High	Master Protein	Q91W53	Golgin subfamily A member 7 OS=Mus musculus OX=10090 GN=Golga7 PE=1 SV=1	17	4	Golga7	1.076	0.873666	Peak Found	High	High	High	High	High	High	High	High	High
High	Master Protein	B1B1D8	39S ribosomal protein L2, mitochondrial OS=Mus musculus OX=10090 GN=Mrpl2 PE=1 SV=1	3	3	Mrpl2	1.204	0.874413	High	Peak Found	Peak Found	Peak Found	Peak Found	High	High	Peak Found	Peak Found	Peak Found
High	Master Protein	Q3THS6	S-adenosylmethionine synthase isoform type-2 OS=Mus musculus OX=10090 GN=Mat2a PE=1 SV=2	45	8	Mat2a	0.934	0.874413	High	High	High	High	High	High	High	High	High	High
High	Master Protein	Q3UJU9	Regulator of microtubule dynamics protein 3 OS=Mus musculus OX=10090 GN=Rmdn3 PE=1 SV=2	95	12	Rmdn3	1.046	0.874413	High	High	High	High	High	High	High	High	High	High
High	Master Protein	Q61187	Tumor susceptibility gene 101 protein OS=Mus musculus OX=10090 GN=Tsg101 PE=1 SV=2	59	12	Tsg101	0.923	0.874413	High	High	High	High	High	High	High	High	High	High
High	Master Protein	P12970	60S ribosomal protein L7a OS=Mus musculus OX=10090 GN=Rpl7a PE=1 SV=2	125	13	Rpl7a	0.933	0.874413	High	High	High	High	High	High	High	High	High	High
High	Master Protein	Q78PY7	Staphylococcal nuclease domain-containing protein 1 OS=Mus musculus OX=10090 GN=Snd1 PE=1 SV=1	203	31	Snd1	0.928	0.874413	High	High	High	High	High	High	High	High	High	High
High	Master Protein	G3UZK1	Guanine nucleotide-binding protein subunit gamma OS=Mus musculus OX=10090 GN=Gm20503 PE=3 SV=1	17	2	Gm20503	0.858	0.874713	High	High	High	High	Peak Found	High	High	High	High	High
High	Master Protein	Q9D1J3	SAP domain-containing ribonucleoprotein OS=Mus musculus OX=10090 GN=Sarnp PE=1 SV=3	5	2	Sarnp	0.857	0.874713	High	High	Peak Found	Peak Found	Peak Found	Peak Found	High	High	High	Peak Found
High	Master Protein	Q9Z0S6	Claudin-10 OS=Mus musculus OX=10090 GN=Cldn10 PE=1 SV=2	26	3	Cldn10	0.885	0.874713	High	High	High	High	High	High	High	High	High	High
High	Master Protein	O09174	Alpha-methylacyl-CoA racemase OS=Mus musculus OX=10090 GN=Amacr PE=1 SV=4	10	3	Amacr	0.852	0.874713	High	Peak Found	High	High	Peak Found	High	High	High	Peak Found	High
High	Master Protein	P03893	NADH-ubiquinone oxidoreductase chain 2 OS=Mus musculus OX=10090 GN=Mtnd2 PE=1 SV=2	10	3	Mtnd2	0.857	0.874713	High	High	High	Peak Found	Peak Found	High	High	High	Peak Found	High
High	Master Protein	Q9WUU7	Cathepsin Z OS=Mus musculus OX=10090 GN=Ctsz PE=1 SV=1	20	3	Ctsz	1.102	0.874713	High	High	High	High	High	Peak Found	High	High	High	High
High	Master Protein	Q61112	45 kDa calcium-binding protein OS=Mus musculus OX=10090 GN=Sdf4 PE=1 SV=1	7	3	Sdf4	1.139	0.874713	Peak Found	High	High	Peak Found	High	Peak Found	High	Peak Found	Peak Found	High
High	Master Protein	P63321	Ras-related protein Ral-A OS=Mus musculus OX=10090 GN=Rala PE=1 SV=1	103	4	Rala	0.934	0.874713	High	High	High	High	High	High	High	High	High	High
High	Master Protein	Q5SUT0	RNA-binding protein EWS OS=Mus musculus OX=10090 GN=Ewsr1 PE=1 SV=1	27	4	Ewsr1	1.08	0.874713	High	High	High	High	High	High	High	High	High	High
High	Master Protein	O70250	Phosphoglycerate mutase 2 OS=Mus musculus OX=10090 GN=Pgam2 PE=1 SV=3	83	4	Pgam2	0.884	0.874713	High	High	High	High	High	High	High	High	High	High
High	Master Protein	Q8R3H7	Heparan sulfate 2-O-sulfotransferase 1 OS=Mus musculus OX=10090 GN=Hs2st1 PE=1 SV=2	17	4	Hs2st1	1.131	0.874713	High	High	High	Peak Found	High	High	High	High	High	High
High	Master Protein	P0C027	Diphosphoinositol polyphosphate phosphohydrolase 3-alpha OS=Mus musculus OX=10090 GN=Nudt10 PE=1 SV=1	24	4	Nudt10	0.891	0.874713	High	High	High	High	High	High	High	High	High	High
High	Master Protein	Q9CXY6	Interleukin enhancer-binding factor 2 OS=Mus musculus OX=10090 GN=Ilf2 PE=1 SV=1	4	4	Ilf2	0.866	0.874713	Peak Found	Peak Found	Peak Found	Peak Found	Peak Found	High	High	High	Peak Found	Peak Found
High	Master Protein	Q91YS7	Dual-specificity mitogen-activated protein kinase kinase 2 OS=Mus musculus OX=10090 GN=Map2k2 PE=1 SV=1	87	6	Map2k2	1.072	0.874713	High	High	High	High	High	High	High	High	High	High
High	Master Protein	G3X8R0	Receptor expression-enhancing protein OS=Mus musculus OX=10090 GN=Reep5 PE=1 SV=1	79	6	Reep5	1.045	0.874713	High	High	High	High	High	High	High	High	High	High
High	Master Protein	Q99M04	Lipoyl synthase, mitochondrial OS=Mus musculus OX=10090 GN=Lias PE=1 SV=1	17	6	Lias	1.072	0.874713	High	High	High	Peak Found	High	High	High	High	High	High
High	Master Protein	F6VT60	AFG1-like ATPase (Fragment) OS=Mus musculus OX=10090 GN=Afg1l PE=1 SV=1	17	6	Afg1l	1.108	0.874713	High	High	High	High	High	High	High	High	Peak Found	High
High	Master Protein	Q8VD33	Small glutamine-rich tetratricopeptide repeat-containing protein beta OS=Mus musculus OX=10090 GN=Sgtb PE=1 SV=1	61	7	Sgtb	0.913	0.874713	High	High	High	High	High	High	High	High	High	High
High	Master Protein	Q9D0L4	AarF domain-containing protein kinase 1 OS=Mus musculus OX=10090 GN=Adck1 PE=1 SV=1	31	7	Adck1	1.098	0.874713	High	High	High	High	High	High	High	High	High	High
High	Master Protein	O55222	Integrin-linked protein kinase OS=Mus musculus OX=10090 GN=Ilk PE=1 SV=2	28	7	Ilk	0.911	0.874713	High	High	High	High	High	High	High	High	High	High
High	Master Protein	Q9CWG8	Protein arginine methyltransferase NDUFAF7, mitochondrial OS=Mus musculus OX=10090 GN=Ndufaf7 PE=1 SV=4	19	7	Ndufaf7	1.084	0.874713	High	High	High	High	High	High	High	High	Peak Found	High
High	Master Protein	Q63912	Oligodendrocyte-myelin glycoprotein OS=Mus musculus OX=10090 GN=Omg PE=1 SV=1	98	8	Omg	0.94	0.874713	High	High	High	High	High	High	High	High	High	High
High	Master Protein	Q9CPS5	26S proteasome non-ATPase regulatory subunit 8 OS=Mus musculus OX=10090 GN=Psmd8 PE=1 SV=2	67	9	Psmd8	1.058	0.874713	High	High	High	High	High	High	High	High	High	High
High	Master Protein	G3UWG2	T-lymphoma invasion and metastasis-inducing protein 1 OS=Mus musculus OX=10090 GN=Tiam1 PE=1 SV=1	21	9	Tiam1	0.884	0.874713	High	High	Peak Found	High	Peak Found	High	High	High	High	High
High	Master Protein	Q8VDQ1	Prostaglandin reductase 2 OS=Mus musculus OX=10090 GN=Ptgr2 PE=1 SV=2	30	10	Ptgr2	0.907	0.874713	High	High	High	High	High	High	High	High	High	High
High	Master Protein	Q8BHF7	CDP-diacylglycerol--glycerol-3-phosphate 3-phosphatidyltransferase, mitochondrial OS=Mus musculus OX=10090 GN=Pgs1 PE=1 SV=1	68	10	Pgs1	1.069	0.874713	High	High	High	High	High	High	High	High	High	High
High	Master Protein	Q920R0	Alsin OS=Mus musculus OX=10090 GN=Als2 PE=1 SV=3	37	10	Als2	1.107	0.874713	High	High	High	High	High	High	High	High	High	High
High	Master Protein	Q99LP6	GrpE protein homolog 1, mitochondrial OS=Mus musculus OX=10090 GN=Grpel1 PE=1 SV=1	88	12	Grpel1	1.044	0.874713	High	High	High	High	High	High	High	High	High	High
High	Master Protein	A0A0R4J2C2	Synaptotagmin-2 OS=Mus musculus OX=10090 GN=Syt2 PE=1 SV=1	267	13	Syt2	1.045	0.874713	High	High	High	High	High	High	High	High	High	High
High	Master Protein	Q8BP92	Reticulocalbin-2 OS=Mus musculus OX=10090 GN=Rcn2 PE=1 SV=1	136	15	Rcn2	0.933	0.874713	High	High	High	High	High	High	High	High	High	High
High	Master Protein	P09405	Nucleolin OS=Mus musculus OX=10090 GN=Ncl PE=1 SV=2	93	15	Ncl	0.923	0.874713	High	High	High	High	High	High	High	High	High	High
High	Master Protein	B1ATI0	Aldehyde dehydrogenase OS=Mus musculus OX=10090 GN=Aldh3a2 PE=1 SV=1	75	16	Aldh3a2	1.052	0.874713	High	High	High	High	High	High	High	High	High	High
High	Master Protein	O88544	COP9 signalosome complex subunit 4 OS=Mus musculus OX=10090 GN=Cops4 PE=1 SV=1	165	24	Cops4	0.94	0.874713	High	High	High	High	High	High	High	High	High	High
High	Master Protein	Q80TZ3	Putative tyrosine-protein phosphatase auxilin OS=Mus musculus OX=10090 GN=Dnajc6 PE=1 SV=2	397	27	Dnajc6	0.946	0.874713	High	High	High	High	High	High	High	High	High	High
High	Master Protein	O54774	AP-3 complex subunit delta-1 OS=Mus musculus OX=10090 GN=Ap3d1 PE=1 SV=1	381	41	Ap3d1	0.946	0.874713	High	High	High	High	High	High	High	High	High	High
High	Master Protein	Q64521	Glycerol-3-phosphate dehydrogenase, mitochondrial OS=Mus musculus OX=10090 GN=Gpd2 PE=1 SV=2	722	48	Gpd2	1.055	0.874713	High	High	High	High	High	High	High	High	High	High
High	Master Protein	E9PUZ1	Mitogen-activated protein kinase kinase kinase 12 (Fragment) OS=Mus musculus OX=10090 GN=Map3k12 PE=1 SV=1	2	2	Map3k12	0.853	0.874905	Peak Found	Not Found	Not Found	Peak Found	Peak Found	Peak Found	High	Peak Found	Peak Found	High
High	Master Protein	Q62132	Receptor-type tyrosine-protein phosphatase R OS=Mus musculus OX=10090 GN=Ptprr PE=1 SV=1	25	7	Ptprr	1.103	0.874905	High	High	High	High	High	High	High	High	High	High
High	Master Protein	P56480	ATP synthase subunit beta, mitochondrial OS=Mus musculus OX=10090 GN=Atp5f1b PE=1 SV=2	2648	36	Atp5f1b	1.055	0.875115	High	High	High	High	High	High	High	High	High	High
High	Master Protein	Q3TCH7	Cullin-4A OS=Mus musculus OX=10090 GN=Cul4a PE=1 SV=1	50	6	Cul4a	0.889	0.875379	High	High	High	High	High	High	High	High	High	High
High	Master Protein	Q68FM6	Protein phosphatase 1 regulatory subunit 29 OS=Mus musculus OX=10090 GN=Elfn2 PE=1 SV=1	82	11	Elfn2	1.043	0.875401	High	High	High	High	High	High	High	High	High	High
High	Master Protein	P62702	40S ribosomal protein S4, X isoform OS=Mus musculus OX=10090 GN=Rps4x PE=1 SV=2	143	15	Rps4x	0.933	0.875401	High	High	High	High	High	High	High	High	High	High
High	Master Protein	K3W4L3	Prosaposin OS=Mus musculus OX=10090 GN=Psap PE=1 SV=1	240	23	Psap	1.054	0.875401	High	High	High	High	High	High	High	High	High	High
High	Master Protein	E9Q1X8	Voltage-dependent calcium channel subunit alpha-2/delta-1 OS=Mus musculus OX=10090 GN=Cacna2d1 PE=1 SV=2	370	38	Cacna2d1	0.947	0.875417	High	High	High	High	High	High	High	High	High	High
High	Master Protein	Q3TMH2	Secernin-3 OS=Mus musculus OX=10090 GN=Scrn3 PE=1 SV=1	56	8	Scrn3	1.046	0.875652	High	High	High	High	High	High	High	High	High	High
High	Master Protein	Q3UKC1	Tax1-binding protein 1 homolog OS=Mus musculus OX=10090 GN=Tax1bp1 PE=1 SV=2	15	7	Tax1bp1	0.886	0.877132	High	High	Peak Found	Peak Found	Peak Found	High	High	High	High	Peak Found
High	Master Protein	Q3UDE2	Tubulin--tyrosine ligase-like protein 12 OS=Mus musculus OX=10090 GN=Ttll12 PE=1 SV=1	44	11	Ttll12	1.087	0.877132	High	High	High	High	High	High	High	High	High	High
High	Master Protein	D3YWN7	Ensconsin OS=Mus musculus OX=10090 GN=Map7 PE=1 SV=2	10	4	Map7	0.869	0.878187	High	High	Peak Found	High	High	High	High	Peak Found	High	Peak Found
High	Master Protein	Q9EQ80	NIF3-like protein 1 OS=Mus musculus OX=10090 GN=Nif3l1 PE=1 SV=4	44	8	Nif3l1	1.057	0.878187	High	High	High	High	High	High	High	High	High	High
High	Master Protein	H3BJB4	RING finger protein 141 OS=Mus musculus OX=10090 GN=Rnf141 PE=1 SV=1	9	4	Rnf141	0.883	0.8782	High	High	Peak Found	Peak Found	High	Peak Found	High	High	Peak Found	High
High	Master Protein	Q9D6J6	NADH dehydrogenase [ubiquinone] flavoprotein 2, mitochondrial OS=Mus musculus OX=10090 GN=Ndufv2 PE=1 SV=2	291	15	Ndufv2	0.947	0.8782	High	High	High	High	High	High	High	High	High	High
High	Master Protein	P51163	Uroporphyrinogen-III synthase OS=Mus musculus OX=10090 GN=Uros PE=1 SV=1	25	5	Uros	0.891	0.878629	High	High	Peak Found	High	High	High	High	High	High	High
High	Master Protein	E9QNG6	Sorting nexin-13 OS=Mus musculus OX=10090 GN=Snx13 PE=1 SV=2	3	2	Snx13	1.252	0.879238	Peak Found	High	Peak Found	Peak Found	Peak Found	Not Found	Peak Found	High	Peak Found	High
High	Master Protein	Q7TQK5	Coiled-coil domain-containing protein 93 OS=Mus musculus OX=10090 GN=Ccdc93 PE=1 SV=1	25	8	Ccdc93	0.892	0.879238	High	High	High	High	High	High	High	Peak Found	High	High
High	Master Protein	Q9JIA7	Sphingosine kinase 2 OS=Mus musculus OX=10090 GN=Sphk2 PE=1 SV=2	22	5	Sphk2	0.89	0.879622	High	High	High	High	High	High	High	High	High	High
High	Master Protein	Q7TNR6	Immunoglobulin superfamily member 21 OS=Mus musculus OX=10090 GN=Igsf21 PE=1 SV=1	80	11	Igsf21	0.915	0.879745	High	High	High	High	High	High	High	High	High	High
High	Master Protein	P59764	Dedicator of cytokinesis protein 4 OS=Mus musculus OX=10090 GN=Dock4 PE=1 SV=1	54	14	Dock4	1.07	0.879911	High	High	High	High	High	High	High	High	High	High
High	Master Protein	Q3UM45	Protein phosphatase 1 regulatory subunit 7 OS=Mus musculus OX=10090 GN=Ppp1r7 PE=1 SV=2	257	23	Ppp1r7	0.94	0.879911	High	High	High	High	High	High	High	High	High	High
High	Master Protein	Q62108	Disks large homolog 4 OS=Mus musculus OX=10090 GN=Dlg4 PE=1 SV=1	616	37	Dlg4	1.055	0.879911	High	High	High	High	High	High	High	High	High	High
High	Master Protein	Q9Z1D1	Eukaryotic translation initiation factor 3 subunit G OS=Mus musculus OX=10090 GN=Eif3g PE=1 SV=2	43	6	Eif3g	0.909	0.880707	High	High	High	High	High	High	High	High	High	High
High	Master Protein	Q9ERK4	Exportin-2 OS=Mus musculus OX=10090 GN=Cse1l PE=1 SV=1	169	29	Cse1l	0.928	0.881364	High	High	High	High	High	High	High	High	High	High
High	Master Protein	Q9D1I5	Methylmalonyl-CoA epimerase, mitochondrial OS=Mus musculus OX=10090 GN=Mcee PE=1 SV=1	15	4	Mcee	1.103	0.881476	High	High	High	High	High	High	Peak Found	High	Peak Found	High
High	Master Protein	Q80YN3	Breast carcinoma-amplified sequence 1 homolog OS=Mus musculus OX=10090 GN=Bcas1 PE=1 SV=3	126	13	Bcas1	1.047	0.881476	High	High	High	High	High	High	High	High	High	High
High	Master Protein	Q5SQX6	Cytoplasmic FMR1-interacting protein 2 OS=Mus musculus OX=10090 GN=Cyfip2 PE=1 SV=2	497	29	Cyfip2	0.947	0.881476	High	High	High	High	High	High	High	High	High	High
High	Master Protein	Q9D0L8	mRNA cap guanine-N7 methyltransferase OS=Mus musculus OX=10090 GN=Rnmt PE=1 SV=1	29	7	Rnmt	0.912	0.882222	High	High	High	High	High	High	High	High	High	High
High	Master Protein	Q61771	Kinesin-like protein KIF3B OS=Mus musculus OX=10090 GN=Kif3b PE=1 SV=1	50	9	Kif3b	1.075	0.882304	High	High	High	High	High	High	High	High	High	High
High	Master Protein	P62812	Gamma-aminobutyric acid receptor subunit alpha-1 OS=Mus musculus OX=10090 GN=Gabra1 PE=1 SV=1	117	8	Gabra1	1.045	0.882716	High	High	High	High	High	High	High	High	High	High
High	Master Protein	Q8C166	Copine-1 OS=Mus musculus OX=10090 GN=Cpne1 PE=1 SV=1	60	9	Cpne1	0.909	0.882716	High	High	High	High	High	High	High	High	High	High
High	Master Protein	P47759	Neuronal vesicle trafficking-associated protein 2 OS=Mus musculus OX=10090 GN=Nsg2 PE=1 SV=1	9	2	Nsg2	1.121	0.882837	High	High	High	High	High	Peak Found	High	Peak Found	Peak Found	High
High	Master Protein	V9GWU7	Non-specific serine/threonine protein kinase OS=Mus musculus OX=10090 GN=Wnk3 PE=1 SV=1	11	2	Wnk3	1.236	0.882848	High	Peak Found	Not Found	Peak Found	Not Found	Peak Found	Not Found	Peak Found	Peak Found	Not Found
High	Master Protein	Q9WVT6	Carbonic anhydrase 14 OS=Mus musculus OX=10090 GN=Ca14 PE=1 SV=1	6	2	Ca14	1.145	0.882848	High	Peak Found	Peak Found	Peak Found	High	High	High	High	Peak Found	Peak Found
High	Master Protein	Q9CQY1	Ubiquitin-like protein ATG12 OS=Mus musculus OX=10090 GN=Atg12 PE=1 SV=1	6	2	Atg12	1.151	0.882848	High	High	Peak Found	High	High	High	Peak Found	Peak Found	Peak Found	High
High	Master Protein	Q8BGN5	NIPA-like protein 3 OS=Mus musculus OX=10090 GN=Nipal3 PE=2 SV=1	18	3	Nipal3	0.913	0.882848	High	High	High	High	High	High	High	High	High	High
High	Master Protein	Q91WK5	Glycine cleavage system H protein, mitochondrial OS=Mus musculus OX=10090 GN=Gcsh PE=1 SV=2	39	3	Gcsh	0.914	0.882848	High	High	High	High	High	High	High	High	High	High
High	Master Protein	Q3URS9	Mitochondrial potassium channel OS=Mus musculus OX=10090 GN=Ccdc51 PE=1 SV=1	9	3	Ccdc51	1.106	0.882848	High	Peak Found	Peak Found	Peak Found	High	High	High	High	High	High
High	Master Protein	Q3TPE9	Ankyrin repeat and MYND domain-containing protein 2 OS=Mus musculus OX=10090 GN=Ankmy2 PE=1 SV=1	5	3	Ankmy2	1.123	0.882848	Peak Found	High	High	Peak Found	High	High	Peak Found	Peak Found	High	Peak Found
High	Master Protein	Q9JJ59	ATP-binding cassette sub-family B member 9 OS=Mus musculus OX=10090 GN=Abcb9 PE=2 SV=1	21	4	Abcb9	1.113	0.882848	Peak Found	High	High	High	High	High	High	High	High	High
High	Master Protein	D3YUV1	Nuclear receptor-binding protein OS=Mus musculus OX=10090 GN=Nrbp1 PE=1 SV=1	16	4	Nrbp1	1.14	0.882848	High	High	High	High	High	High	High	High	High	Peak Found
High	Master Protein	A2AG30	DnaJ homolog subfamily B member 5 OS=Mus musculus OX=10090 GN=Dnajb5 PE=1 SV=1	13	4	Dnajb5	1.108	0.882848	High	High	High	High	High	Peak Found	Peak Found	High	High	High
High	Master Protein	P58158	Galactosylgalactosylxylosylprotein 3-beta-glucuronosyltransferase 3 OS=Mus musculus OX=10090 GN=B3gat3 PE=1 SV=1	8	4	B3gat3	1.109	0.882848	High	Peak Found	Peak Found	Peak Found	High	High	High	High	High	Peak Found
High	Master Protein	Q9DC71	28S ribosomal protein S15, mitochondrial OS=Mus musculus OX=10090 GN=Mrps15 PE=1 SV=2	14	4	Mrps15	1.106	0.882848	High	Peak Found	High	Peak Found	High	High	High	High	High	High
High	Master Protein	Q99KR7	Peptidyl-prolyl cis-trans isomerase F, mitochondrial OS=Mus musculus OX=10090 GN=Ppif PE=1 SV=1	66	5	Ppif	0.914	0.882848	High	High	High	High	High	High	High	High	High	High
High	Master Protein	Q8BIE6	FERM domain-containing protein 4A OS=Mus musculus OX=10090 GN=Frmd4a PE=1 SV=2	15	5	Frmd4a	0.862	0.882848	High	High	High	High	High	High	High	High	High	High
High	Master Protein	Q9D428	Golgin subfamily A member 7B OS=Mus musculus OX=10090 GN=GOLGA7B PE=1 SV=1	33	5	GOLGA7B	1.072	0.882848	High	High	High	High	High	High	High	High	High	High
High	Master Protein	Q8R5C5	Beta-centractin OS=Mus musculus OX=10090 GN=Actr1b PE=1 SV=1	200	6	Actr1b	0.947	0.882848	High	High	High	High	High	High	High	High	High	High
High	Master Protein	Q9R1P1	Proteasome subunit beta type-3 OS=Mus musculus OX=10090 GN=Psmb3 PE=1 SV=1	52	6	Psmb3	0.913	0.882848	High	High	High	High	High	High	High	High	High	High
High	Master Protein	Q3TLM7	Sorting nexin-16 OS=Mus musculus OX=10090 GN=Snx16 PE=1 SV=1	24	6	Snx16	1.072	0.882848	High	High	High	High	High	High	High	High	High	High
High	Master Protein	A0A338P786	Ubiquitin-conjugating enzyme E2 L3 (Fragment) OS=Mus musculus OX=10090 GN=Ube2l3 PE=1 SV=1	66	7	Ube2l3	0.928	0.882848	High	High	High	High	High	High	High	High	High	High
High	Master Protein	Q9ERE7	LRP chaperone MESD OS=Mus musculus OX=10090 GN=Mesd PE=1 SV=1	29	7	Mesd	1.072	0.882848	High	High	High	High	High	High	High	High	High	High
High	Master Protein	Q2TPA8	Hydroxysteroid dehydrogenase-like protein 2 OS=Mus musculus OX=10090 GN=Hsdl2 PE=1 SV=1	28	7	Hsdl2	1.069	0.882848	High	High	High	High	High	High	High	High	High	High
High	Master Protein	Q9JL56	Glycerophosphodiester phosphodiesterase 1 OS=Mus musculus OX=10090 GN=Gde1 PE=1 SV=1	62	8	Gde1	1.041	0.882848	High	High	High	High	High	High	High	High	High	High
High	Master Protein	Q8QZR5	Alanine aminotransferase 1 OS=Mus musculus OX=10090 GN=Gpt PE=1 SV=3	24	8	Gpt	0.907	0.882848	High	High	High	High	High	High	High	High	High	High
High	Master Protein	Q78ZM0	Sorting nexin-3 OS=Mus musculus OX=10090 GN=Snx3 PE=1 SV=1	73	9	Snx3	1.041	0.882848	High	High	High	High	High	High	High	High	High	High
High	Master Protein	Q9CYG7	Mitochondrial import receptor subunit TOM34 OS=Mus musculus OX=10090 GN=Tomm34 PE=1 SV=1	74	10	Tomm34	0.912	0.882848	High	High	High	High	High	High	High	High	High	High
High	Master Protein	Q8JZR0	Long-chain-fatty-acid--CoA ligase 5 OS=Mus musculus OX=10090 GN=Acsl5 PE=1 SV=1	44	10	Acsl5	0.9	0.882848	High	High	High	High	High	High	High	High	High	High
High	Master Protein	Q8CH77	Neuron navigator 1 OS=Mus musculus OX=10090 GN=Nav1 PE=1 SV=2	28	12	Nav1	1.04	0.882848	High	High	High	High	High	High	High	High	High	High
High	Master Protein	Q9DBG6	Dolichyl-diphosphooligosaccharide--protein glycosyltransferase subunit 2 OS=Mus musculus OX=10090 GN=Rpn2 PE=1 SV=1	131	13	Rpn2	0.928	0.882848	High	High	High	High	High	High	High	High	High	High
High	Master Protein	Q8JZQ9	Eukaryotic translation initiation factor 3 subunit B OS=Mus musculus OX=10090 GN=Eif3b PE=1 SV=1	62	13	Eif3b	0.913	0.882848	High	High	High	High	High	High	High	High	High	High
High	Master Protein	O70443	Guanine nucleotide-binding protein G(z) subunit alpha OS=Mus musculus OX=10090 GN=Gnaz PE=1 SV=4	176	15	Gnaz	0.939	0.882848	High	High	High	High	High	High	High	High	High	High
High	Master Protein	A0A2I3BPP1	Tuberin OS=Mus musculus OX=10090 GN=Tsc2 PE=1 SV=1	51	15	Tsc2	1.055	0.882848	High	High	High	High	High	High	High	High	High	High
High	Master Protein	A2A699	Protein FAM171A2 OS=Mus musculus OX=10090 GN=Fam171a2 PE=1 SV=1	121	16	Fam171a2	1.043	0.882848	High	High	High	High	High	High	High	High	High	High
High	Master Protein	Q8BFU3	RING finger protein 214 OS=Mus musculus OX=10090 GN=Rnf214 PE=1 SV=1	86	16	Rnf214	0.938	0.882848	High	High	High	High	High	High	High	High	High	High
High	Master Protein	Q9ESJ4	NCK-interacting protein with SH3 domain OS=Mus musculus OX=10090 GN=Nckipsd PE=1 SV=2	109	16	Nckipsd	1.041	0.882848	High	High	High	High	High	High	High	High	High	High
High	Master Protein	A0A1B0GSX0	L-lactate dehydrogenase OS=Mus musculus OX=10090 GN=Ldha PE=1 SV=1	452	21	Ldha	1.054	0.882848	High	High	High	High	High	High	High	High	High	High
High	Master Protein	Q91V14	Solute carrier family 12 member 5 OS=Mus musculus OX=10090 GN=Slc12a5 PE=1 SV=2	464	23	Slc12a5	1.054	0.882848	High	High	High	High	High	High	High	High	High	High
High	Master Protein	P47857	ATP-dependent 6-phosphofructokinase, muscle type OS=Mus musculus OX=10090 GN=Pfkm PE=1 SV=3	525	30	Pfkm	0.947	0.882848	High	High	High	High	High	High	High	High	High	High
High	Master Protein	Q9R111	Guanine deaminase OS=Mus musculus OX=10090 GN=Gda PE=1 SV=1	390	30	Gda	0.948	0.882848	High	High	High	High	High	High	High	High	High	High
High	Master Protein	Q9JLV5	Cullin-3 OS=Mus musculus OX=10090 GN=Cul3 PE=1 SV=1	203	30	Cul3	0.93	0.882848	High	High	High	High	High	High	High	High	High	High
High	Master Protein	Q9D967	Magnesium-dependent phosphatase 1 OS=Mus musculus OX=10090 GN=Mdp1 PE=1 SV=1	29	3	Mdp1	0.914	0.883253	High	High	High	High	High	High	High	High	High	High
High	Master Protein	Q3TXX3	Protrudin OS=Mus musculus OX=10090 GN=Zfyve27 PE=1 SV=2	3	3	Zfyve27	1.186	0.883253	Peak Found	High	Not Found	Not Found	High	High	Not Found	Peak Found	Not Found	Peak Found
High	Master Protein	P61460	GATOR complex protein DEPDC5 OS=Mus musculus OX=10090 GN=Depdc5 PE=1 SV=2	6	3	Depdc5	1.224	0.883253	Not Found	Peak Found	Peak Found	High	Peak Found	Peak Found	High	High	High	Not Found
High	Master Protein	Q9JL62	Glycolipid transfer protein OS=Mus musculus OX=10090 GN=Gltp PE=1 SV=3	24	6	Gltp	1.073	0.883253	High	High	High	High	High	High	High	High	High	High
High	Master Protein	Q8K2C9	Very-long-chain (3R)-3-hydroxyacyl-CoA dehydratase 3 OS=Mus musculus OX=10090 GN=Hacd3 PE=1 SV=2	52	7	Hacd3	1.053	0.883253	High	High	High	High	High	High	High	High	High	High
High	Master Protein	A0A1L1SSF2	ADP-dependent glucokinase OS=Mus musculus OX=10090 GN=Adpgk PE=1 SV=1	29	7	Adpgk	0.887	0.883253	High	High	High	High	High	High	High	High	High	High
High	Master Protein	Q9D1M0	Protein SEC13 homolog OS=Mus musculus OX=10090 GN=Sec13 PE=1 SV=3	37	8	Sec13	0.913	0.883253	High	High	High	High	High	High	High	High	High	High
High	Master Protein	Q9D8W7	OCIA domain-containing protein 2 OS=Mus musculus OX=10090 GN=Ociad2 PE=1 SV=1	75	8	Ociad2	1.042	0.883253	High	High	High	High	High	High	High	High	High	High
High	Master Protein	F8WHQ1	Tumor protein D52 OS=Mus musculus OX=10090 GN=Tpd52 PE=1 SV=1	90	9	Tpd52	1.042	0.883253	High	High	High	High	High	High	High	High	High	High
High	Master Protein	P50580	Proliferation-associated protein 2G4 OS=Mus musculus OX=10090 GN=Pa2g4 PE=1 SV=3	129	14	Pa2g4	0.919	0.883253	High	High	High	High	High	High	High	High	High	High
High	Master Protein	Q9CWJ9	Bifunctional purine biosynthesis protein ATIC OS=Mus musculus OX=10090 GN=Atic PE=1 SV=2	232	26	Atic	0.935	0.883253	High	High	High	High	High	High	High	High	High	High
High	Master Protein	P62869	Elongin-B OS=Mus musculus OX=10090 GN=Elob PE=1 SV=1	61	10	Elob	0.919	0.88414	High	High	High	High	High	High	High	High	High	High
High	Master Protein	Q9CRB9	MICOS complex subunit Mic19 OS=Mus musculus OX=10090 GN=Chchd3 PE=1 SV=1	130	11	Chchd3	1.045	0.88414	High	High	High	High	High	High	High	High	High	High
High	Master Protein	Q9QX11	Cytohesin-1 OS=Mus musculus OX=10090 GN=Cyth1 PE=1 SV=2	52	7	Cyth1	1.095	0.884168	High	High	High	High	High	High	High	High	High	High
High	Master Protein	Q9R257	Heme-binding protein 1 OS=Mus musculus OX=10090 GN=Hebp1 PE=1 SV=2	40	9	Hebp1	0.915	0.884168	High	High	High	High	High	High	High	High	High	High
High	Master Protein	Q9CWZ7	Gamma-soluble NSF attachment protein OS=Mus musculus OX=10090 GN=Napg PE=1 SV=1	345	23	Napg	0.948	0.884198	High	High	High	High	High	High	High	High	High	High
High	Master Protein	Q00PI9	Heterogeneous nuclear ribonucleoprotein U-like protein 2 OS=Mus musculus OX=10090 GN=Hnrnpul2 PE=1 SV=2	8	3	Hnrnpul2	1.152	0.884606	Peak Found	Peak Found	Peak Found	Peak Found	High	High	High	High	Peak Found	High
High	Master Protein	Q5NCF2	Trafficking protein particle complex subunit 1 OS=Mus musculus OX=10090 GN=Trappc1 PE=1 SV=1	12	3	Trappc1	1.104	0.88488	High	High	High	High	High	High	High	High	Peak Found	Peak Found
High	Master Protein	P17439	Lysosomal acid glucosylceramidase OS=Mus musculus OX=10090 GN=Gba PE=1 SV=1	12	5	Gba	0.891	0.88488	Peak Found	High	High	Peak Found	High	High	High	High	High	High
High	Master Protein	Q61937	Nucleophosmin OS=Mus musculus OX=10090 GN=Npm1 PE=1 SV=1	92	8	Npm1	0.927	0.88488	High	High	High	High	High	High	High	High	High	High
High	Master Protein	Q9ERT9	Protein phosphatase 1 regulatory subunit 1A OS=Mus musculus OX=10090 GN=Ppp1r1a PE=1 SV=1	41	8	Ppp1r1a	0.914	0.88488	High	High	High	High	High	High	High	High	High	High
High	Master Protein	Q8BXC6	COMM domain-containing protein 2 OS=Mus musculus OX=10090 GN=Commd2 PE=1 SV=1	4	2	Commd2	1.24	0.885655	Peak Found	High	High	Peak Found	Peak Found	Peak Found	High	Peak Found	High	Peak Found
High	Master Protein	D3Z5H3	Signal peptidase complex catalytic subunit SEC11 OS=Mus musculus OX=10090 GN=Sec11c PE=1 SV=2	11	4	Sec11c	1.104	0.885655	High	High	Peak Found	High	Peak Found	High	High	High	High	Peak Found
High	Master Protein	G3UXL2	Ribose-phosphate diphosphokinase OS=Mus musculus OX=10090 GN=Prps1l3 PE=3 SV=1	107	9	Prps1l3	0.929	0.885655	High	High	High	High	High	High	High	High	High	High
High	Master Protein	Q9CQI3	Glia maturation factor beta OS=Mus musculus OX=10090 GN=Gmfb PE=1 SV=3	123	11	Gmfb	0.939	0.885655	High	High	High	High	High	High	High	High	High	High
High	Master Protein	P58404	Striatin-4 OS=Mus musculus OX=10090 GN=Strn4 PE=1 SV=2	115	15	Strn4	1.039	0.885655	High	High	High	High	High	High	High	High	High	High
High	Master Protein	Q62443	Neuronal pentraxin-1 OS=Mus musculus OX=10090 GN=Nptx1 PE=1 SV=1	175	16	Nptx1	1.043	0.885655	High	High	High	High	High	High	High	High	High	High
High	Master Protein	Q91XX1	Protocadherin gamma C3 OS=Mus musculus OX=10090 GN=Pcdhgc3 PE=1 SV=1	25	2	Pcdhgc3	1.222	0.885715	Peak Found	Peak Found	Peak Found	Peak Found	Peak Found	High	High	Peak Found	Peak Found	Peak Found
High	Master Protein	Q8K183	Pyridoxal kinase OS=Mus musculus OX=10090 GN=Pdxk PE=1 SV=1	194	13	Pdxk	0.947	0.885715	High	High	High	High	High	High	High	High	High	High
High	Master Protein	G3X9K3	Brefeldin A-inhibited guanine nucleotide-exchange protein 1 OS=Mus musculus OX=10090 GN=Arfgef1 PE=1 SV=1	93	18	Arfgef1	0.915	0.885715	High	High	High	High	High	High	High	High	High	High
High	Master Protein	Q810U4	Neuronal cell adhesion molecule OS=Mus musculus OX=10090 GN=Nrcam PE=1 SV=2	363	2	Nrcam	0.868	0.885762	High	Peak Found	High	High	High	High	High	High	High	Peak Found
High	Master Protein	Q9D1X0	Nucleolar protein 3 OS=Mus musculus OX=10090 GN=Nol3 PE=1 SV=1	52	9	Nol3	1.052	0.885762	High	High	High	High	High	High	High	High	High	High
High	Master Protein	Q6ZWN5	40S ribosomal protein S9 OS=Mus musculus OX=10090 GN=Rps9 PE=1 SV=3	71	13	Rps9	0.926	0.88714	High	High	High	High	High	High	High	High	High	High
High	Master Protein	Q3V0G7	GTPase-activating Rap/Ran-GAP domain-like protein 3 OS=Mus musculus OX=10090 GN=Garnl3 PE=1 SV=1	14	5	Garnl3	0.872	0.887262	High	High	High	High	High	High	High	Peak Found	High	High
High	Master Protein	Q11136	Xaa-Pro dipeptidase OS=Mus musculus OX=10090 GN=Pepd PE=1 SV=3	61	10	Pepd	0.921	0.887262	High	High	High	High	High	High	High	High	High	High
High	Master Protein	P70271	PDZ and LIM domain protein 4 OS=Mus musculus OX=10090 GN=Pdlim4 PE=1 SV=3	2	2	Pdlim4	1.231	0.887641	Peak Found	High	Peak Found	Peak Found	High	Peak Found	Peak Found	Peak Found	Peak Found	Peak Found
High	Master Protein	Q11011	Puromycin-sensitive aminopeptidase OS=Mus musculus OX=10090 GN=Npepps PE=1 SV=2	497	44	Npepps	0.949	0.887641	High	High	High	High	High	High	High	High	High	High
High	Master Protein	P61458	Pterin-4-alpha-carbinolamine dehydratase OS=Mus musculus OX=10090 GN=Pcbd1 PE=1 SV=2	8	3	Pcbd1	0.892	0.889606	High	High	High	High	Peak Found	High	High	Peak Found	High	High
High	Master Protein	E9PXF0	Protocadherin 17 OS=Mus musculus OX=10090 GN=Pcdh17 PE=1 SV=1	11	6	Pcdh17	0.875	0.889606	High	High	High	Peak Found	Peak Found	Peak Found	Peak Found	High	High	High
High	Master Protein	O08989	Ras-related protein M-Ras OS=Mus musculus OX=10090 GN=Mras PE=1 SV=1	37	8	Mras	1.054	0.889606	High	High	High	High	High	High	High	High	High	High
High	Master Protein	A0A0U1RP81	MICOS complex subunit MIC60 OS=Mus musculus OX=10090 GN=Immt PE=1 SV=1	461	2	Immt	0.915	0.890337	High	High	High	High	High	High	High	Peak Found	High	High
High	Master Protein	Q9ERF3	WD repeat-containing protein 61 OS=Mus musculus OX=10090 GN=Wdr61 PE=1 SV=1	8	3	Wdr61	0.863	0.890776	High	Peak Found	Peak Found	Peak Found	Peak Found	High	High	Peak Found	High	High
High	Master Protein	Q9QYB1	Chloride intracellular channel protein 4 OS=Mus musculus OX=10090 GN=Clic4 PE=1 SV=3	109	14	Clic4	1.051	0.890962	High	High	High	High	High	High	High	High	High	High
High	Master Protein	A2BE93	Protein SET (Fragment) OS=Mus musculus OX=10090 GN=Set PE=1 SV=1	23	3	Set	0.895	0.891282	High	High	Peak Found	High	High	High	High	High	High	High
High	Master Protein	P07310	Creatine kinase M-type OS=Mus musculus OX=10090 GN=Ckm PE=1 SV=1	17	5	Ckm	1.096	0.891282	High	High	High	High	High	Peak Found	High	High	High	High
High	Master Protein	O35598	Disintegrin and metalloproteinase domain-containing protein 10 OS=Mus musculus OX=10090 GN=Adam10 PE=1 SV=2	33	8	Adam10	0.895	0.891282	High	High	High	High	High	High	High	High	High	High
High	Master Protein	Q9QUR7	Peptidyl-prolyl cis-trans isomerase NIMA-interacting 1 OS=Mus musculus OX=10090 GN=Pin1 PE=1 SV=1	118	9	Pin1	0.93	0.891282	High	High	High	High	High	High	High	High	High	High
High	Master Protein	Q791V5	Mitochondrial carrier homolog 2 OS=Mus musculus OX=10090 GN=Mtch2 PE=1 SV=1	252	13	Mtch2	1.052	0.891282	High	High	High	High	High	High	High	High	High	High
High	Master Protein	O88712	C-terminal-binding protein 1 OS=Mus musculus OX=10090 GN=Ctbp1 PE=1 SV=2	154	20	Ctbp1	1.052	0.891282	High	High	High	High	High	High	High	High	High	High
High	Master Protein	Q8BH59	Calcium-binding mitochondrial carrier protein Aralar1 OS=Mus musculus OX=10090 GN=Slc25a12 PE=1 SV=1	793	33	Slc25a12	1.052	0.891282	High	High	High	High	High	High	High	High	High	High
High	Master Protein	O08530	Sphingosine 1-phosphate receptor 1 OS=Mus musculus OX=10090 GN=S1pr1 PE=1 SV=3	34	4	S1pr1	0.916	0.891722	High	High	High	High	High	High	High	High	High	High
High	Master Protein	B2RXS4	Plexin-B2 OS=Mus musculus OX=10090 GN=Plxnb2 PE=1 SV=1	96	21	Plxnb2	0.933	0.891722	High	High	High	High	High	High	High	High	High	High
High	Master Protein	Q8C0L9	Glycerophosphocholine phosphodiesterase GPCPD1 OS=Mus musculus OX=10090 GN=Gpcpd1 PE=1 SV=1	22	5	Gpcpd1	1.116	0.892105	High	High	High	Peak Found	High	High	High	High	High	High
High	Master Protein	Q8BNN1	Spermatogenesis-associated protein 2-like protein OS=Mus musculus OX=10090 GN=Spata2l PE=1 SV=1	14	5	Spata2l	0.874	0.892105	High	High	High	Peak Found	High	High	Peak Found	High	High	High
High	Master Protein	Q499X9	Methionine--tRNA ligase, mitochondrial OS=Mus musculus OX=10090 GN=Mars2 PE=1 SV=2	23	7	Mars2	1.089	0.892105	High	High	High	High	High	High	High	High	High	High
High	Master Protein	Q14BB9	MAP6 domain-containing protein 1 OS=Mus musculus OX=10090 GN=Map6d1 PE=1 SV=1	51	8	Map6d1	0.915	0.892105	High	High	High	High	High	High	High	High	High	High
High	Master Protein	Q9R0A0	Peroxisomal membrane protein PEX14 OS=Mus musculus OX=10090 GN=Pex14 PE=1 SV=1	41	8	Pex14	1.069	0.892105	High	High	High	High	High	High	High	High	High	High
High	Master Protein	A0A0R4J094	Fumarylacetoacetate hydrolase domain-containing 2A OS=Mus musculus OX=10090 GN=Fahd2a PE=1 SV=1	142	14	Fahd2a	1.044	0.892105	High	High	High	High	High	High	High	High	High	High
High	Master Protein	E9Q3M9	Capping protein-inhibiting regulator of actin-like OS=Mus musculus OX=10090 GN=Cracdl PE=1 SV=1	224	15	Cracdl	0.931	0.892105	High	High	High	High	High	High	High	High	High	High
High	Master Protein	Q14BI2	Metabotropic glutamate receptor 2 OS=Mus musculus OX=10090 GN=Grm2 PE=1 SV=2	216	18	Grm2	1.044	0.892105	High	High	High	High	High	High	High	High	High	High
High	Master Protein	Q8R574	Phosphoribosyl pyrophosphate synthase-associated protein 2 OS=Mus musculus OX=10090 GN=Prpsap2 PE=1 SV=1	114	13	Prpsap2	0.942	0.892844	High	High	High	High	High	High	High	High	High	High
High	Master Protein	Q8BP67	60S ribosomal protein L24 OS=Mus musculus OX=10090 GN=Rpl24 PE=1 SV=2	53	5	Rpl24	0.927	0.893462	High	High	High	High	High	High	High	High	High	High
High	Master Protein	A0A1W2P6F6	Myosin light polypeptide 6 OS=Mus musculus OX=10090 GN=Myl6 PE=1 SV=1	116	2	Myl6	0.935	0.895244	High	High	High	High	High	High	High	Peak Found	Peak Found	Peak Found
High	Master Protein	Q9CY34	NEDD8-conjugating enzyme UBE2F OS=Mus musculus OX=10090 GN=Ube2f PE=1 SV=1	21	3	Ube2f	0.867	0.895244	High	High	High	High	High	High	High	High	High	High
High	Master Protein	Q9JME7	Trafficking protein particle complex subunit 2-like protein OS=Mus musculus OX=10090 GN=Trappc2l PE=1 SV=1	7	4	Trappc2l	1.126	0.895244	High	Peak Found	Peak Found	Peak Found	Peak Found	Peak Found	High	High	High	High
High	Master Protein	Q3TTW5	Pumilio homolog 1 OS=Mus musculus OX=10090 GN=Pum1 PE=1 SV=1	4	4	Pum1	0.865	0.895244	Peak Found	Peak Found	Peak Found	Peak Found	Peak Found	High	High	Peak Found	Peak Found	Peak Found
High	Master Protein	Q8VCD6	Receptor expression-enhancing protein 2 OS=Mus musculus OX=10090 GN=Reep2 PE=1 SV=2	49	6	Reep2	0.915	0.895244	High	High	High	High	High	High	High	High	High	High
High	Master Protein	P39087	Glutamate receptor ionotropic, kainate 2 OS=Mus musculus OX=10090 GN=Grik2 PE=1 SV=4	10	6	Grik2	1.068	0.895244	High	High	Peak Found	High	High	High	Peak Found	High	Peak Found	Peak Found
High	Master Protein	Q9D0A3	Arpin OS=Mus musculus OX=10090 GN=Arpin PE=1 SV=1	22	6	Arpin	0.897	0.895244	High	High	High	High	High	High	High	High	High	High
High	Master Protein	Q9QZ08	N-acetyl-D-glucosamine kinase OS=Mus musculus OX=10090 GN=Nagk PE=1 SV=3	23	7	Nagk	0.909	0.895244	High	High	High	High	High	High	High	High	High	High
High	Master Protein	Q8BH66	Atlastin-1 OS=Mus musculus OX=10090 GN=Atl1 PE=1 SV=1	229	23	Atl1	0.937	0.895244	High	High	High	High	High	High	High	High	High	High
High	Master Protein	B1AZP2	Disks large-associated protein 4 OS=Mus musculus OX=10090 GN=Dlgap4 PE=1 SV=1	212	27	Dlgap4	1.043	0.895244	High	High	High	High	High	High	High	High	High	High
High	Master Protein	Q9JII5	DAZ-associated protein 1 OS=Mus musculus OX=10090 GN=Dazap1 PE=1 SV=2	20	4	Dazap1	0.892	0.895269	High	High	High	High	High	High	High	High	High	High
High	Master Protein	P70460	Vasodilator-stimulated phosphoprotein OS=Mus musculus OX=10090 GN=Vasp PE=1 SV=4	12	4	Vasp	0.865	0.895613	High	High	High	High	High	Peak Found	High	High	High	High
High	Master Protein	A0A1L1SSC0	Leucine-rich repeat flightless-interacting protein 2 OS=Mus musculus OX=10090 GN=Lrrfip2 PE=1 SV=2	42	9	Lrrfip2	1.049	0.895613	High	High	High	High	High	High	High	High	High	High
High	Master Protein	Q5SWZ5	Myosin phosphatase Rho-interacting protein OS=Mus musculus OX=10090 GN=Mprip PE=1 SV=1	95	27	Mprip	1.039	0.895613	High	High	High	High	High	High	High	High	High	High
High	Master Protein	Q8R554	OTU domain-containing protein 7A OS=Mus musculus OX=10090 GN=Otud7a PE=1 SV=1	14	3	Otud7a	1.138	0.895687	High	High	Peak Found	High	High	High	High	High	High	High
High	Master Protein	G3X928	SEC23-interacting protein OS=Mus musculus OX=10090 GN=Sec23ip PE=1 SV=1	8	5	Sec23ip	0.87	0.895687	Peak Found	Peak Found	High	Peak Found	High	High	High	High	Peak Found	High
High	Master Protein	Q03137	Ephrin type-A receptor 4 OS=Mus musculus OX=10090 GN=Epha4 PE=1 SV=2	140	22	Epha4	1.038	0.895687	High	High	High	High	High	High	High	High	High	High
High	Master Protein	Q3UGS4	Mapk-regulated corepressor-interacting protein 1 OS=Mus musculus OX=10090 GN=Mcrip1 PE=1 SV=1	30	4	Mcrip1	0.914	0.895816	High	High	High	High	High	High	High	High	High	High
High	Master Protein	Q99J08	SEC14-like protein 2 OS=Mus musculus OX=10090 GN=Sec14l2 PE=1 SV=1	42	7	Sec14l2	0.914	0.895816	High	High	High	High	High	High	High	High	High	High
High	Master Protein	Q923Z0	G-protein coupled receptor family C group 5 member B OS=Mus musculus OX=10090 GN=Gprc5b PE=1 SV=1	51	6	Gprc5b	0.915	0.897117	High	High	High	High	High	High	High	High	High	High
High	Master Protein	Q8K2B3	Succinate dehydrogenase [ubiquinone] flavoprotein subunit, mitochondrial OS=Mus musculus OX=10090 GN=Sdha PE=1 SV=1	482	30	Sdha	1.051	0.897195	High	High	High	High	High	High	High	High	High	High
High	Master Protein	Q8R307	Vacuolar protein sorting-associated protein 18 homolog OS=Mus musculus OX=10090 GN=Vps18 PE=1 SV=2	39	13	Vps18	0.933	0.898145	High	High	High	High	High	High	High	High	High	High
High	Master Protein	Q99J09	Methylosome protein 50 OS=Mus musculus OX=10090 GN=Wdr77 PE=1 SV=1	13	4	Wdr77	1.099	0.898915	Peak Found	High	High	High	High	High	High	High	High	High
High	Master Protein	Q8BXA0	Leucine-rich repeat and fibronectin type-III domain-containing protein 5 OS=Mus musculus OX=10090 GN=Lrfn5 PE=1 SV=1	19	5	Lrfn5	1.108	0.898915	High	High	High	High	High	High	High	Peak Found	High	High
High	Master Protein	Q9WUM3	Coronin-1B OS=Mus musculus OX=10090 GN=Coro1b PE=1 SV=1	143	15	Coro1b	0.931	0.898915	High	High	High	High	High	High	High	High	High	High
High	Master Protein	E9QK34	Neuroligin-1 OS=Mus musculus OX=10090 GN=Nlgn1 PE=1 SV=1	35	7	Nlgn1	0.907	0.899316	High	High	Peak Found	High	High	High	Peak Found	High	High	High
High	Master Protein	Q8BFR4	N-acetylglucosamine-6-sulfatase OS=Mus musculus OX=10090 GN=Gns PE=1 SV=1	13	5	Gns	0.897	0.89994	High	Peak Found	High	High	High	High	High	Peak Found	High	High
High	Master Protein	Q9ET80	Junctophilin-1 OS=Mus musculus OX=10090 GN=Jph1 PE=1 SV=1	6	2	Jph1	1.196	0.899965	High	High	Peak Found	Peak Found	Peak Found	High	High	High	Peak Found	High
High	Master Protein	O09044	Synaptosomal-associated protein 23 OS=Mus musculus OX=10090 GN=Snap23 PE=1 SV=1	32	3	Snap23	1.103	0.900436	High	High	High	Peak Found	High	High	High	High	High	High
High	Master Protein	A0A0R4J0Y4	Seizure 6-like protein OS=Mus musculus OX=10090 GN=Sez6l PE=1 SV=1	23	6	Sez6l	0.917	0.900436	High	High	High	High	High	High	High	High	High	High
High	Master Protein	Z4YJJ5	Deubiquitinating enzyme CYLD OS=Mus musculus OX=10090 GN=Cyld PE=1 SV=1	82	20	Cyld	0.917	0.900436	High	High	High	High	High	High	High	High	High	High
High	Master Protein	Q9DCC4	Pyrroline-5-carboxylate reductase 3 OS=Mus musculus OX=10090 GN=Pycr3 PE=1 SV=2	53	6	Pycr3	1.049	0.900499	High	High	High	High	High	High	High	High	High	High
High	Master Protein	Q9QYE6	Golgin subfamily A member 5 OS=Mus musculus OX=10090 GN=Golga5 PE=1 SV=2	9	4	Golga5	0.93	0.900885	Peak Found	Peak Found	Peak Found	High	High	High	High	High	High	Peak Found
High	Master Protein	Q9D4I9	Ras-related protein Rab-23 OS=Mus musculus OX=10090 GN=Rab23 PE=1 SV=1	41	7	Rab23	1.048	0.901427	High	High	High	High	High	High	High	High	High	High
High	Master Protein	P70207	Plexin-A2 OS=Mus musculus OX=10090 GN=Plxna2 PE=1 SV=2	149	13	Plxna2	1.061	0.902013	High	High	High	High	High	High	High	High	High	High
High	Master Protein	Q922Q8	Leucine-rich repeat-containing protein 59 OS=Mus musculus OX=10090 GN=Lrrc59 PE=1 SV=1	87	12	Lrrc59	1.043	0.902145	High	High	High	High	High	High	High	High	High	High
High	Master Protein	Q68FE6	Rho family-interacting cell polarization regulator 1 OS=Mus musculus OX=10090 GN=Ripor1 PE=1 SV=2	3	3	Ripor1	0.86	0.902357	High	Peak Found	Peak Found	Peak Found	Not Found	Peak Found	Peak Found	High	High	Peak Found
High	Master Protein	Q8BYI8	Protein FAM234B OS=Mus musculus OX=10090 GN=Fam234b PE=1 SV=1	42	8	Fam234b	1.09	0.902357	High	High	High	High	High	High	High	High	High	High
High	Master Protein	Q8BGY7	Protein FAM210A OS=Mus musculus OX=10090 GN=Fam210a PE=1 SV=1	7	3	Fam210a	0.912	0.902763	Peak Found	High	Peak Found	High	Peak Found	High	High	High	Peak Found	Peak Found
High	Master Protein	A0A2R8VHF1	RIKEN cDNA D430041D05 gene OS=Mus musculus OX=10090 GN=D430041D05Rik PE=1 SV=1	129	21	D430041D05Rik	1.038	0.902763	High	High	High	High	High	High	High	High	High	High
High	Master Protein	B1AQZ0	Septin-8 OS=Mus musculus OX=10090 GN=Septin8 PE=1 SV=1	415	3	Septin8	1.051	0.903001	High	High	High	High	High	High	High	High	High	High
High	Master Protein	P08556	GTPase NRas OS=Mus musculus OX=10090 GN=Nras PE=1 SV=1	204	3	Nras	1.052	0.903001	High	High	High	High	High	High	High	High	Peak Found	High
High	Master Protein	Q9D898	Actin-related protein 2/3 complex subunit 5-like protein OS=Mus musculus OX=10090 GN=Arpc5l PE=1 SV=1	80	9	Arpc5l	0.941	0.903001	High	High	High	High	High	High	High	High	High	High
High	Master Protein	P21278	Guanine nucleotide-binding protein subunit alpha-11 OS=Mus musculus OX=10090 GN=Gna11 PE=1 SV=1	160	11	Gna11	1.04	0.903001	High	High	High	High	High	High	High	High	High	High
High	Master Protein	Q8K4W8	Chloride channel protein OS=Mus musculus OX=10090 GN=Clcn3 PE=1 SV=1	16	3	Clcn3	1.095	0.903459	High	High	Peak Found	High	High	High	High	Peak Found	Peak Found	High
High	Master Protein	Q9CQU5	ZW10 interactor OS=Mus musculus OX=10090 GN=Zwint PE=1 SV=1	34	6	Zwint	0.918	0.903459	High	High	High	High	High	High	High	High	High	High
High	Master Protein	Q9WTN0	Geranylgeranyl pyrophosphate synthase OS=Mus musculus OX=10090 GN=Ggps1 PE=1 SV=1	25	6	Ggps1	0.898	0.903459	High	High	High	High	High	High	High	High	High	Peak Found
High	Master Protein	Q91YD9	Neural Wiskott-Aldrich syndrome protein OS=Mus musculus OX=10090 GN=Wasl PE=1 SV=1	52	9	Wasl	0.916	0.903459	High	High	High	High	High	High	High	High	High	High
High	Master Protein	Q8BZ98	Dynamin-3 OS=Mus musculus OX=10090 GN=Dnm3 PE=1 SV=1	693	30	Dnm3	0.951	0.903459	High	High	High	High	High	High	High	High	High	High
High	Master Protein	O88653	Ragulator complex protein LAMTOR3 OS=Mus musculus OX=10090 GN=Lamtor3 PE=1 SV=1	15	2	Lamtor3	0.888	0.90409	High	High	High	High	High	Peak Found	High	High	High	High
High	Master Protein	Q9CQ10	Charged multivesicular body protein 3 OS=Mus musculus OX=10090 GN=Chmp3 PE=1 SV=3	9	2	Chmp3	0.898	0.90409	Peak Found	Peak Found	Peak Found	Peak Found	Peak Found	High	High	High	High	Peak Found
High	Master Protein	Q7TN79	A-kinase anchor protein 7 isoform gamma OS=Mus musculus OX=10090 GN=Akap7 PE=1 SV=2	35	3	Akap7	1.049	0.90409	High	High	High	High	High	High	High	High	High	High
High	Master Protein	Q3V0K9	Plastin-1 OS=Mus musculus OX=10090 GN=Pls1 PE=1 SV=1	43	5	Pls1	1.132	0.90409	High	High	High	High	High	High	High	High	High	High
High	Master Protein	P97370	Sodium/potassium-transporting ATPase subunit beta-3 OS=Mus musculus OX=10090 GN=Atp1b3 PE=1 SV=1	144	11	Atp1b3	1.037	0.90409	High	High	High	High	High	High	High	High	High	High
High	Master Protein	O88952	Protein lin-7 homolog C OS=Mus musculus OX=10090 GN=Lin7c PE=1 SV=2	114	6	Lin7c	1.038	0.904422	High	High	High	High	High	High	High	High	High	High
High	Master Protein	P62137	Serine/threonine-protein phosphatase PP1-alpha catalytic subunit OS=Mus musculus OX=10090 GN=Ppp1ca PE=1 SV=1	243	5	Ppp1ca	1.04	0.90493	High	High	High	High	High	High	High	High	High	High
High	Master Protein	Q99K23	Ufm1-specific protease 2 OS=Mus musculus OX=10090 GN=Ufsp2 PE=1 SV=1	22	8	Ufsp2	1.096	0.90493	High	High	High	High	High	Peak Found	High	Peak Found	High	High
High	Master Protein	Q9JLB0	MAGUK p55 subfamily member 6 OS=Mus musculus OX=10090 GN=Mpp6 PE=1 SV=1	198	23	Mpp6	1.042	0.90493	High	High	High	High	High	High	High	High	High	High
High	Master Protein	O54984	ATPase GET3 OS=Mus musculus OX=10090 GN=Get3 PE=1 SV=2	104	11	Get3	1.042	0.904964	High	High	High	High	High	High	High	High	High	High
High	Master Protein	O88834	SH2 domain-containing adapter protein D OS=Mus musculus OX=10090 GN=Shd PE=1 SV=1	4	2	Shd	0.826	0.905106	Not Found	Peak Found	Peak Found	High	Peak Found	Not Found	High	High	Peak Found	Peak Found
High	Master Protein	Q64299	CCN family member 3 OS=Mus musculus OX=10090 GN=Ccn3 PE=1 SV=1	11	2	Ccn3	0.882	0.905106	High	Peak Found	High	Peak Found	High	High	High	High	High	High
High	Master Protein	E9Q3Y7	RIKEN cDNA C530008M17 gene OS=Mus musculus OX=10090 GN=Cracd PE=1 SV=1	3	2	Cracd	1.203	0.905106	Peak Found	Peak Found	Peak Found	High	High	Peak Found	Not Found	Peak Found	Peak Found	Peak Found
High	Master Protein	B1AQX6	SRC kinase-signaling inhibitor 1 OS=Mus musculus OX=10090 GN=Srcin1 PE=1 SV=1	927	3	Srcin1	1.05	0.905106	High	High	High	High	High	High	High	High	High	High
High	Master Protein	Q5SSH7	Zinc finger ZZ-type and EF-hand domain-containing protein 1 OS=Mus musculus OX=10090 GN=Zzef1 PE=1 SV=2	15	3	Zzef1	1.11	0.905106	High	High	High	High	High	Peak Found	High	High	Peak Found	High
High	Master Protein	A0A5F8MP75	Mitogen-activated protein kinase OS=Mus musculus OX=10090 GN=Mapk10 PE=1 SV=1	130	4	Mapk10	1.068	0.905106	High	High	High	High	High	High	High	High	High	High
High	Master Protein	Q922H4	Mannose-1-phosphate guanyltransferase alpha OS=Mus musculus OX=10090 GN=Gmppa PE=1 SV=1	22	4	Gmppa	1.051	0.905106	High	High	High	High	High	High	High	High	High	High
High	Master Protein	A0A1D5RLV3	Protein unc-80 homolog OS=Mus musculus OX=10090 GN=Unc80 PE=1 SV=1	4	4	Unc80	1.133	0.905106	High	High	High	Peak Found	Peak Found	Peak Found	High	Peak Found	Peak Found	Peak Found
High	Master Protein	P54731	FAS-associated factor 1 OS=Mus musculus OX=10090 GN=Faf1 PE=1 SV=2	10	6	Faf1	1.104	0.905106	High	High	Peak Found	Peak Found	High	Peak Found	High	Peak Found	High	High
High	Master Protein	Q9Z2Z6	Mitochondrial carnitine/acylcarnitine carrier protein OS=Mus musculus OX=10090 GN=Slc25a20 PE=1 SV=1	27	9	Slc25a20	1.078	0.905106	High	High	High	High	High	High	High	High	High	High
High	Master Protein	Q9Z2A0	3-phosphoinositide-dependent protein kinase 1 OS=Mus musculus OX=10090 GN=Pdpk1 PE=1 SV=2	87	16	Pdpk1	0.92	0.905106	High	High	High	High	High	High	High	High	High	High
High	Master Protein	A0A0N4SUZ0	Membrane-associated guanylate kinase, WW and PDZ domain-containing protein 1 OS=Mus musculus OX=10090 GN=Magi1 PE=1 SV=1	138	24	Magi1	0.926	0.905106	High	High	High	High	High	High	High	High	High	High
High	Master Protein	Q6TA13	Kinesin-like protein KIF1A OS=Mus musculus OX=10090 GN=Kif1a PE=1 SV=1	260	34	Kif1a	0.941	0.905106	High	High	High	High	High	High	High	High	High	High
High	Master Protein	Q6A065	Centrosomal protein of 170 kDa OS=Mus musculus OX=10090 GN=Cep170 PE=1 SV=2	175	34	Cep170	0.931	0.905106	High	High	High	High	High	High	High	High	High	High
High	Master Protein	Q91YN0	Protein C12orf4 homolog OS=Mus musculus OX=10090 GN=D6Wsu163e PE=1 SV=1	7	2	D6Wsu163e	1.112	0.905126	High	Peak Found	High	High	Peak Found	High	Peak Found	High	High	High
High	Master Protein	P11352	Glutathione peroxidase 1 OS=Mus musculus OX=10090 GN=Gpx1 PE=1 SV=2	70	9	Gpx1	1.048	0.905126	High	High	High	High	High	High	High	High	High	High
High	Master Protein	Q80YQ8	E3 ubiquitin-protein ligase RMND5A OS=Mus musculus OX=10090 GN=Rmnd5a PE=1 SV=2	7	4	Rmnd5a	0.869	0.905181	High	High	Peak Found	Peak Found	Peak Found	High	Peak Found	High	Peak Found	Peak Found
High	Master Protein	Q9CQB4	Cytochrome b-c1 complex subunit 7 OS=Mus musculus OX=10090 GN=Uqcrb PE=1 SV=1	347	11	Uqcrb	1.05	0.905181	High	High	High	High	High	High	High	High	High	High
High	Master Protein	Q8C078	Calcium/calmodulin-dependent protein kinase kinase 2 OS=Mus musculus OX=10090 GN=Camkk2 PE=1 SV=2	105	20	Camkk2	0.929	0.905181	High	High	High	High	High	High	High	High	High	High
High	Master Protein	P61211	ADP-ribosylation factor-like protein 1 OS=Mus musculus OX=10090 GN=Arl1 PE=1 SV=1	40	3	Arl1	0.899	0.905473	High	High	High	High	High	High	High	High	High	High
High	Master Protein	O55091	Protein IMPACT OS=Mus musculus OX=10090 GN=Impact PE=1 SV=2	74	11	Impact	0.929	0.905473	High	High	High	High	High	High	High	High	High	High
High	Master Protein	A0A0U1RPY6	ADP-ribosylation factor-like protein 6-interacting protein 1 (Fragment) OS=Mus musculus OX=10090 GN=Arl6ip1 PE=1 SV=1	28	2	Arl6ip1	1.058	0.90555	High	High	High	High	High	High	High	High	High	High
High	Master Protein	Q6PAM0	5'-AMP-activated protein kinase subunit beta-2 OS=Mus musculus OX=10090 GN=Prkab2 PE=1 SV=1	28	6	Prkab2	0.902	0.90555	High	High	High	High	High	High	High	High	High	High
High	Master Protein	Q3TL44	NLR family member X1 OS=Mus musculus OX=10090 GN=Nlrx1 PE=1 SV=1	27	6	Nlrx1	1.089	0.90555	High	High	High	High	High	High	High	High	High	High
High	Master Protein	P61226	Ras-related protein Rap-2b OS=Mus musculus OX=10090 GN=Rap2b PE=1 SV=1	167	7	Rap2b	0.942	0.90555	High	High	High	High	High	High	High	High	High	High
High	Master Protein	Q9D051	Pyruvate dehydrogenase E1 component subunit beta, mitochondrial OS=Mus musculus OX=10090 GN=Pdhb PE=1 SV=1	475	18	Pdhb	1.05	0.90555	High	High	High	High	High	High	High	High	High	High
High	Master Protein	Q7TNS5	RIKEN cDNA B630019K06 gene OS=Mus musculus OX=10090 GN=B630019K06Rik PE=1 SV=1	15	3	B630019K06Rik	0.872	0.906015	High	High	High	High	Peak Found	High	Peak Found	High	High	High
High	Master Protein	Q8VDN4	Coiled-coil domain-containing protein 92 OS=Mus musculus OX=10090 GN=Ccdc92 PE=1 SV=1	37	7	Ccdc92	1.07	0.906068	High	High	High	High	High	High	High	High	High	High
High	Master Protein	Q920M5	Coronin-6 OS=Mus musculus OX=10090 GN=Coro6 PE=1 SV=1	20	3	Coro6	1.108	0.907609	High	Peak Found	High	High	High	Peak Found	Peak Found	Peak Found	Peak Found	Peak Found
High	Master Protein	A2AHM4	Phosphatase and actin regulator OS=Mus musculus OX=10090 GN=Phactr3 PE=1 SV=1	5	3	Phactr3	0.852	0.907609	Peak Found	Peak Found	High	High	High	Peak Found	High	High	Peak Found	Peak Found
High	Master Protein	Q9R1S8	Calpain-7 OS=Mus musculus OX=10090 GN=Capn7 PE=2 SV=1	4	3	Capn7	1.128	0.907609	Peak Found	High	Peak Found	High	High	Peak Found	Peak Found	Peak Found	Peak Found	High
High	Master Protein	F6Z9E6	PH and SEC7 domain-containing protein 3 OS=Mus musculus OX=10090 GN=Psd3 PE=1 SV=2	253	6	Psd3	1.049	0.907609	Peak Found	High	High	High	Peak Found	High	High	Peak Found	High	High
High	Master Protein	Q91YS8	Calcium/calmodulin-dependent protein kinase type 1 OS=Mus musculus OX=10090 GN=Camk1 PE=1 SV=1	72	6	Camk1	0.914	0.907609	High	High	High	High	High	High	High	High	High	High
High	Master Protein	Q9WU28	Prefoldin subunit 5 OS=Mus musculus OX=10090 GN=Pfdn5 PE=1 SV=1	47	7	Pfdn5	0.915	0.907609	High	High	High	High	High	High	High	High	High	High
High	Master Protein	P61148	Fibroblast growth factor 1 OS=Mus musculus OX=10090 GN=Fgf1 PE=1 SV=1	21	4	Fgf1	0.885	0.907752	High	High	High	High	High	High	High	High	High	High
High	Master Protein	Q64337	Sequestosome-1 OS=Mus musculus OX=10090 GN=Sqstm1 PE=1 SV=1	67	12	Sqstm1	0.918	0.907752	High	High	High	High	High	High	High	High	High	High
High	Master Protein	O88685	26S proteasome regulatory subunit 6A OS=Mus musculus OX=10090 GN=Psmc3 PE=1 SV=2	138	19	Psmc3	0.933	0.907948	High	High	High	High	High	High	High	High	High	High
High	Master Protein	Q8K3G9	DCC-interacting protein 13-beta OS=Mus musculus OX=10090 GN=Appl2 PE=1 SV=1	41	7	Appl2	0.909	0.908029	High	High	High	High	High	High	High	High	High	High
High	Master Protein	P62874	Guanine nucleotide-binding protein G(I)/G(S)/G(T) subunit beta-1 OS=Mus musculus OX=10090 GN=Gnb1 PE=1 SV=3	554	11	Gnb1	0.952	0.908029	High	High	High	High	High	High	High	High	High	High
High	Master Protein	Q08890	Iduronate 2-sulfatase OS=Mus musculus OX=10090 GN=Ids PE=2 SV=3	7	3	Ids	0.87	0.908097	Peak Found	Peak Found	Peak Found	High	High	High	High	High	High	Peak Found
High	Master Protein	P99028	Cytochrome b-c1 complex subunit 6, mitochondrial OS=Mus musculus OX=10090 GN=Uqcrh PE=1 SV=2	93	8	Uqcrh	0.943	0.908097	High	High	High	High	High	High	High	High	High	High
High	Master Protein	Q9WV85	Nucleoside diphosphate kinase 3 OS=Mus musculus OX=10090 GN=Nme3 PE=1 SV=3	14	3	Nme3	0.875	0.908151	High	Peak Found	High	High	High	High	High	High	High	High
High	Master Protein	Q9DCI9	39S ribosomal protein L32, mitochondrial OS=Mus musculus OX=10090 GN=Mrpl32 PE=1 SV=1	14	4	Mrpl32	1.115	0.908151	High	High	High	High	Peak Found	High	High	High	High	Peak Found
High	Master Protein	B1AXV0	DOMON domain-containing protein FRRS1L OS=Mus musculus OX=10090 GN=Frrs1l PE=1 SV=1	42	6	Frrs1l	0.918	0.908151	High	High	High	High	High	High	High	High	High	High
High	Master Protein	O70503	Very-long-chain 3-oxoacyl-CoA reductase OS=Mus musculus OX=10090 GN=Hsd17b12 PE=1 SV=1	58	9	Hsd17b12	1.048	0.908151	High	High	High	High	High	High	High	High	High	High
High	Master Protein	O88958	Glucosamine-6-phosphate isomerase 1 OS=Mus musculus OX=10090 GN=Gnpda1 PE=1 SV=3	25	5	Gnpda1	0.914	0.908934	High	High	High	High	High	High	High	High	High	High
High	Master Protein	A0A2I3BR11	Bcl-2-like protein 2 (Fragment) OS=Mus musculus OX=10090 GN=Bcl2l2 PE=3 SV=1	12	2	Bcl2l2	0.871	0.908936	High	High	Peak Found	High	High	Peak Found	High	High	High	High
High	Master Protein	Q63959	Potassium voltage-gated channel subfamily C member 3 OS=Mus musculus OX=10090 GN=Kcnc3 PE=1 SV=2	15	3		1.107	0.908936	Peak Found	High	High	High	High	Peak Found	High	High	High	High
High	Master Protein	G3X9Y1	Synaptotagmin-3 OS=Mus musculus OX=10090 GN=Syt3 PE=1 SV=1	30	4	Syt3	1.063	0.908936	High	High	High	High	High	High	High	High	High	High
High	Master Protein	Q0VE82	Copine-7 OS=Mus musculus OX=10090 GN=Cpne7 PE=1 SV=1	33	6	Cpne7	1.095	0.908936	High	High	High	High	High	High	High	High	High	High
High	Master Protein	Q9D8T7	SRA stem-loop-interacting RNA-binding protein, mitochondrial OS=Mus musculus OX=10090 GN=Slirp PE=1 SV=2	34	6	Slirp	1.066	0.908936	High	High	High	High	High	High	High	High	High	High
High	Master Protein	A0A0R4J1H0	E3 ubiquitin-protein ligase MARCHF5 OS=Mus musculus OX=10090 GN=Marchf5 PE=1 SV=1	31	7	Marchf5	1.063	0.908936	High	High	High	High	High	High	High	High	High	High
High	Master Protein	Q8R5J9	PRA1 family protein 3 OS=Mus musculus OX=10090 GN=Arl6ip5 PE=1 SV=2	59	7	Arl6ip5	1.036	0.908936	High	High	High	High	High	High	High	High	High	High
High	Master Protein	P05064	Fructose-bisphosphate aldolase A OS=Mus musculus OX=10090 GN=Aldoa PE=1 SV=2	2200	11	Aldoa	1.049	0.908936	High	High	High	High	High	High	High	High	High	High
High	Master Protein	O08915	AH receptor-interacting protein OS=Mus musculus OX=10090 GN=Aip PE=1 SV=1	57	11	Aip	0.917	0.908936	High	High	High	High	High	High	High	High	High	High
High	Master Protein	A2ASZ8	Calcium-binding mitochondrial carrier protein SCaMC-2 OS=Mus musculus OX=10090 GN=Slc25a25 PE=1 SV=1	75	13	Slc25a25	0.921	0.908936	High	High	High	High	High	High	High	High	High	High
High	Master Protein	B2RUJ5	Amyloid-beta A4 precursor protein-binding family A member 1 OS=Mus musculus OX=10090 GN=Apba1 PE=1 SV=2	68	13	Apba1	0.921	0.908936	High	High	High	High	High	High	High	High	High	High
High	Master Protein	Q6PEV3	WAS/WASL-interacting protein family member 2 OS=Mus musculus OX=10090 GN=Wipf2 PE=1 SV=1	70	13	Wipf2	1.047	0.908936	High	High	High	High	High	High	High	High	High	High
High	Master Protein	Q5SRX1	TOM1-like protein 2 OS=Mus musculus OX=10090 GN=Tom1l2 PE=1 SV=1	188	16	Tom1l2	0.942	0.908936	High	High	High	High	High	High	High	High	High	High
High	Master Protein	Q9D2G2	Dihydrolipoyllysine-residue succinyltransferase component of 2-oxoglutarate dehydrogenase complex, mitochondrial OS=Mus musculus OX=10090 GN=Dlst PE=1 SV=1	327	17	Dlst	1.049	0.908936	High	High	High	High	High	High	High	High	High	High
High	Master Protein	Q60625	Intercellular adhesion molecule 5 OS=Mus musculus OX=10090 GN=Icam5 PE=1 SV=2	409	23	Icam5	0.952	0.908936	High	High	High	High	High	High	High	High	High	High
High	Master Protein	Q9DCV4	Regulator of microtubule dynamics protein 1 OS=Mus musculus OX=10090 GN=Rmdn1 PE=1 SV=2	28	6	Rmdn1	1.067	0.909236	High	High	High	High	High	High	High	High	High	High
High	Master Protein	Q8R5H1	Ubiquitin carboxyl-terminal hydrolase 15 OS=Mus musculus OX=10090 GN=Usp15 PE=1 SV=1	83	16	Usp15	0.917	0.909236	High	High	High	High	High	High	High	High	High	High
High	Master Protein	P17047	Lysosome-associated membrane glycoprotein 2 OS=Mus musculus OX=10090 GN=Lamp2 PE=1 SV=2	13	2	Lamp2	1.1	0.909324	High	Peak Found	High	High	High	High	High	High	High	High
High	Master Protein	P98191	Phosphatidate cytidylyltransferase 1 OS=Mus musculus OX=10090 GN=Cds1 PE=1 SV=2	23	4	Cds1	1.044	0.909596	High	High	High	Peak Found	High	High	High	High	High	High
High	Master Protein	Q8C7H1	Methylmalonic aciduria type A homolog, mitochondrial OS=Mus musculus OX=10090 GN=Mmaa PE=1 SV=1	4	2	Mmaa	0.853	0.909833	Peak Found	High	Peak Found	High	High	High	Peak Found	Peak Found	Peak Found	Peak Found
High	Master Protein	P0C0A3	Charged multivesicular body protein 6 OS=Mus musculus OX=10090 GN=Chmp6 PE=1 SV=2	26	5	Chmp6	0.922	0.911898	High	High	High	High	High	High	High	High	High	High
High	Master Protein	Q3THK7	GMP synthase [glutamine-hydrolyzing] OS=Mus musculus OX=10090 GN=Gmps PE=1 SV=2	99	18	Gmps	0.928	0.911898	High	High	High	High	High	High	High	High	High	High
High	Master Protein	Q99JF8	PC4 and SFRS1-interacting protein OS=Mus musculus OX=10090 GN=Psip1 PE=1 SV=1	13	5	Psip1	0.876	0.912524	Peak Found	High	High	Peak Found	Peak Found	High	High	High	High	High
High	Master Protein	Q3TES0	IQ motif and SEC7 domain-containing protein 3 OS=Mus musculus OX=10090 GN=Iqsec3 PE=1 SV=1	102	15	Iqsec3	1.046	0.913162	High	High	High	High	High	High	High	High	High	High
High	Master Protein	P00493	Hypoxanthine-guanine phosphoribosyltransferase OS=Mus musculus OX=10090 GN=Hprt1 PE=1 SV=3	143	13	Hprt1	0.935	0.913182	High	High	High	High	High	High	High	High	High	High
High	Master Protein	Q5XG69	Soluble lamin-associated protein of 75 kDa OS=Mus musculus OX=10090 GN=Fam169a PE=1 SV=3	2	2	Fam169a	1.225	0.913242	Peak Found	Peak Found	Not Found	Peak Found	Peak Found	High	Peak Found	High	Peak Found	Peak Found
High	Master Protein	Q8BKI2	Trinucleotide repeat-containing gene 6B protein OS=Mus musculus OX=10090 GN=Tnrc6b PE=1 SV=2	4	3	Tnrc6b	0.901	0.913242	High	High	Peak Found	Peak Found	Peak Found	Peak Found	Peak Found	Peak Found	High	High
High	Master Protein	Q921H9	Cytochrome c oxidase assembly factor 7 OS=Mus musculus OX=10090 GN=Coa7 PE=1 SV=1	39	5	Coa7	1.062	0.913242	High	High	High	High	High	High	High	High	High	High
High	Master Protein	Q80UE5	Band 4.1-like protein 2 OS=Mus musculus OX=10090 GN=Epb41l2 PE=1 SV=1	383	2	Epb41l2	0.953	0.913466	Peak Found	Peak Found	Peak Found	Peak Found	Peak Found	High	Peak Found	High	High	Peak Found
High	Master Protein	Q8C0C7	Phenylalanine--tRNA ligase alpha subunit OS=Mus musculus OX=10090 GN=Farsa PE=1 SV=1	107	17	Farsa	0.928	0.913466	High	High	High	High	High	High	High	High	High	High
High	Master Protein	Q3UHL1	CaM kinase-like vesicle-associated protein OS=Mus musculus OX=10090 GN=Camkv PE=1 SV=2	337	24	Camkv	0.953	0.913829	High	High	High	High	High	High	High	High	High	High
High	Master Protein	E9Q6Y8	Ubiquitin-specific peptidase 31 OS=Mus musculus OX=10090 GN=Usp31 PE=1 SV=1	39	11	Usp31	1.089	0.914015	High	High	High	High	High	High	High	High	High	High
High	Master Protein	Q99N87	28S ribosomal protein S5, mitochondrial OS=Mus musculus OX=10090 GN=Mrps5 PE=1 SV=1	9	4	Mrps5	1.089	0.914167	High	High	Peak Found	High	Peak Found	High	High	Peak Found	High	High
High	Master Protein	Q9Z1J3	Cysteine desulfurase, mitochondrial OS=Mus musculus OX=10090 GN=Nfs1 PE=1 SV=3	141	21	Nfs1	1.036	0.914167	High	High	High	High	High	High	High	High	High	High
High	Master Protein	Q8R1G2	Carboxymethylenebutenolidase homolog OS=Mus musculus OX=10090 GN=Cmbl PE=1 SV=1	26	7	Cmbl	0.92	0.914482	High	High	High	High	High	High	High	High	High	High
High	Master Protein	P60843	Eukaryotic initiation factor 4A-I OS=Mus musculus OX=10090 GN=Eif4a1 PE=1 SV=1	173	11	Eif4a1	0.935	0.914482	High	High	High	High	High	High	High	High	High	High
High	Master Protein	Q80Y24	Prickle-like protein 2 OS=Mus musculus OX=10090 GN=Prickle2 PE=1 SV=3	115	22	Prickle2	0.929	0.914482	High	High	High	High	High	High	High	High	High	High
High	Master Protein	Q9D0S9	Histidine triad nucleotide-binding protein 2, mitochondrial OS=Mus musculus OX=10090 GN=Hint2 PE=1 SV=1	61	4	Hint2	1.035	0.914614	High	High	High	High	High	High	High	High	High	High
High	Master Protein	Q9QYY0	GRB2-associated-binding protein 1 OS=Mus musculus OX=10090 GN=Gab1 PE=1 SV=2	2	2	Gab1	1.205	0.91543	Peak Found	Peak Found	Peak Found	Peak Found	Peak Found	High	High	Peak Found	Peak Found	Peak Found
High	Master Protein	Q8VCF0	Mitochondrial antiviral-signaling protein OS=Mus musculus OX=10090 GN=Mavs PE=1 SV=1	8	4	Mavs	0.874	0.91543	Peak Found	Peak Found	Peak Found	Peak Found	Peak Found	Peak Found	High	High	High	Peak Found
High	Master Protein	O88602	Voltage-dependent calcium channel gamma-2 subunit OS=Mus musculus OX=10090 GN=Cacng2 PE=1 SV=1	70	5	Cacng2	1.047	0.91543	High	High	High	High	High	High	High	High	High	High
High	Master Protein	Q8K245	UV radiation resistance-associated protein OS=Mus musculus OX=10090 GN=Uvrag PE=1 SV=2	13	5	Uvrag	0.9	0.91543	High	High	High	High	Peak Found	High	High	High	High	High
High	Master Protein	A0A3B2WDD2	Ribosomal protein OS=Mus musculus OX=10090 GN=Rpl10a PE=1 SV=1	99	8	Rpl10a	0.937	0.91543	High	High	High	High	High	High	High	High	High	High
High	Master Protein	Q8C3F2	Constitutive coactivator of PPAR-gamma-like protein 2 OS=Mus musculus OX=10090 GN=Fam120c PE=1 SV=3	18	8	Fam120c	0.917	0.91543	High	High	Peak Found	High	High	Peak Found	High	High	High	High
High	Master Protein	Q8VHL1	Histone-lysine N-methyltransferase SETD7 OS=Mus musculus OX=10090 GN=Setd7 PE=1 SV=2	73	9	Setd7	0.92	0.91543	High	High	High	High	High	High	High	High	High	High
High	Master Protein	Q8VBZ3	Cleft lip and palate transmembrane protein 1 homolog OS=Mus musculus OX=10090 GN=Clptm1 PE=1 SV=1	60	11	Clptm1	0.923	0.91543	High	High	High	High	High	High	High	High	High	High
High	Master Protein	P61087	Ubiquitin-conjugating enzyme E2 K OS=Mus musculus OX=10090 GN=Ube2k PE=1 SV=3	66	11	Ube2k	0.921	0.91543	High	High	High	High	High	High	High	High	High	High
High	Master Protein	A2AKD7	Alpha-1-syntrophin OS=Mus musculus OX=10090 GN=Snta1 PE=1 SV=1	94	12	Snta1	0.921	0.91543	High	High	High	High	High	High	High	High	High	High
High	Master Protein	E9Q3Q6	Activated leukocyte cell adhesion molecule OS=Mus musculus OX=10090 GN=Alcam PE=1 SV=1	290	27	Alcam	0.953	0.91543	High	High	High	High	High	High	High	High	High	High
High	Master Protein	Q8BMS1	Trifunctional enzyme subunit alpha, mitochondrial OS=Mus musculus OX=10090 GN=Hadha PE=1 SV=1	305	29	Hadha	1.048	0.91543	High	High	High	High	High	High	High	High	High	High
High	Master Protein	Q8BPN8	DmX-like protein 2 OS=Mus musculus OX=10090 GN=Dmxl2 PE=1 SV=3	1005	102	Dmxl2	0.953	0.91543	High	High	High	High	High	High	High	High	High	High
High	Master Protein	F8WHP5	Phospholipase DDHD1 OS=Mus musculus OX=10090 GN=Ddhd1 PE=1 SV=1	22	6	Ddhd1	0.905	0.916467	High	High	High	High	High	High	Peak Found	High	High	High
High	Master Protein	P67778	Prohibitin OS=Mus musculus OX=10090 GN=Phb PE=1 SV=1	244	20	Phb	1.048	0.916467	High	High	High	High	High	High	High	High	High	High
High	Master Protein	Q3UIU2	NADH dehydrogenase [ubiquinone] 1 beta subcomplex subunit 6 OS=Mus musculus OX=10090 GN=Ndufb6 PE=1 SV=3	148	7	Ndufb6	1.036	0.916944	High	High	High	High	High	High	High	High	High	High
High	Master Protein	Q09143	High affinity cationic amino acid transporter 1 OS=Mus musculus OX=10090 GN=Slc7a1 PE=1 SV=1	12	2	Slc7a1	0.878	0.917138	High	High	High	High	High	Peak Found	Peak Found	Peak Found	High	High
High	Master Protein	Q9CQF4	Mitochondrial transcription rescue factor 1 OS=Mus musculus OX=10090 GN=Mtres1 PE=1 SV=1	19	3	Mtres1	0.902	0.917138	High	High	Peak Found	High	Peak Found	High	High	High	High	High
High	Master Protein	A0A140LIW3	FERM and PDZ domain-containing 3 OS=Mus musculus OX=10090 GN=Frmpd3 PE=1 SV=1	10	4	Frmpd3	1.189	0.917138	High	High	High	High	High	Peak Found	Peak Found	High	High	High
High	Master Protein	Q9CQ92	Mitochondrial fission 1 protein OS=Mus musculus OX=10090 GN=Fis1 PE=1 SV=1	38	5	Fis1	1.035	0.917138	High	High	High	High	High	High	High	High	High	High
High	Master Protein	A2APY7	Arginine-hydroxylase NDUFAF5, mitochondrial OS=Mus musculus OX=10090 GN=Ndufaf5 PE=1 SV=1	11	5	Ndufaf5	0.903	0.917138	High	Peak Found	High	Peak Found	Peak Found	High	High	High	High	High
High	Master Protein	Q9CQX2	Cytochrome b5 type B OS=Mus musculus OX=10090 GN=Cyb5b PE=1 SV=1	84	7	Cyb5b	0.936	0.917138	High	High	High	High	High	High	High	High	High	High
High	Master Protein	O55042	Alpha-synuclein OS=Mus musculus OX=10090 GN=Snca PE=1 SV=2	233	9	Snca	1.047	0.917138	High	High	High	High	High	High	High	High	High	High
High	Master Protein	Q8BLE7	Vesicular glutamate transporter 2 OS=Mus musculus OX=10090 GN=Slc17a6 PE=1 SV=1	186	11	Slc17a6	0.933	0.917138	High	High	High	High	High	High	High	High	High	High
High	Master Protein	Q9Z2Y8	Pyridoxal phosphate homeostasis protein OS=Mus musculus OX=10090 GN=Plpbp PE=1 SV=1	68	11	Plpbp	1.037	0.917138	High	High	High	High	High	High	High	High	High	High
High	Master Protein	B1ART2	Vacuolar protein sorting 13D OS=Mus musculus OX=10090 GN=Vps13d PE=1 SV=2	22	14	Vps13d	1.077	0.917138	High	High	High	High	High	High	High	High	High	High
High	Master Protein	A0A1L1SSS4	Nuclear receptor coactivator 7 OS=Mus musculus OX=10090 GN=Ncoa7 PE=1 SV=1	74	15	Ncoa7	0.919	0.917138	High	High	High	High	High	High	High	High	High	High
High	Master Protein	Q920P5	Adenylate kinase isoenzyme 5 OS=Mus musculus OX=10090 GN=Ak5 PE=1 SV=2	135	16	Ak5	0.931	0.917138	High	High	High	High	High	High	High	High	High	High
High	Master Protein	Q6PB44	Tyrosine-protein phosphatase non-receptor type 23 OS=Mus musculus OX=10090 GN=Ptpn23 PE=1 SV=2	125	24	Ptpn23	1.037	0.917138	High	High	High	High	High	High	High	High	High	High
High	Master Protein	Q8BWM0	Prostaglandin E synthase 2 OS=Mus musculus OX=10090 GN=Ptges2 PE=1 SV=3	99	12	Ptges2	1.045	0.917623	High	High	High	High	High	High	High	High	High	High
High	Master Protein	G3X9N3	PNMA-like 2 OS=Mus musculus OX=10090 GN=Pnmal2 PE=1 SV=1	11	5	Pnmal2	0.891	0.917942	High	Peak Found	High	High	Peak Found	High	Peak Found	High	High	High
High	Master Protein	A2ATK9	Family with sequence similarity 171, member A1 OS=Mus musculus OX=10090 GN=Fam171a1 PE=1 SV=1	44	9	Fam171a1	0.922	0.91836	High	High	High	High	High	High	High	High	High	High
High	Master Protein	Q91W86	Vacuolar protein sorting-associated protein 11 homolog OS=Mus musculus OX=10090 GN=Vps11 PE=1 SV=3	82	21	Vps11	1.036	0.918584	High	High	High	High	High	High	High	High	High	High
High	Master Protein	Q9ET43	Claudin-12 OS=Mus musculus OX=10090 GN=Cldn12 PE=1 SV=2	9	2	Cldn12	1.137	0.918786	High	High	High	Peak Found	Peak Found	Peak Found	Peak Found	Peak Found	High	High
High	Master Protein	A0A0R4J1E8	Putative deoxyribonuclease TATDN1 OS=Mus musculus OX=10090 GN=Tatdn1 PE=1 SV=1	9	3	Tatdn1	1.154	0.918786	High	High	High	Peak Found	High	High	High	High	Peak Found	High
High	Master Protein	P56375	Acylphosphatase-2 OS=Mus musculus OX=10090 GN=Acyp2 PE=1 SV=2	40	4	Acyp2	1.044	0.918786	High	High	High	High	High	High	High	High	High	High
High	Master Protein	Q9CWE0	Mitochondrial fission regulator 1-like OS=Mus musculus OX=10090 GN=Mtfr1l PE=1 SV=1	108	11	Mtfr1l	1.034	0.918786	High	High	High	High	High	High	High	High	High	High
High	Master Protein	Q5SUR0	Phosphoribosylformylglycinamidine synthase OS=Mus musculus OX=10090 GN=Pfas PE=1 SV=1	46	13	Pfas	1.043	0.918786	High	High	High	High	High	High	High	High	High	High
High	Master Protein	Q7TMY8	E3 ubiquitin-protein ligase HUWE1 OS=Mus musculus OX=10090 GN=Huwe1 PE=1 SV=5	190	39	Huwe1	0.942	0.918786	High	High	High	High	High	High	High	High	High	High
High	Master Protein	Q8C7D2	Protein cereblon OS=Mus musculus OX=10090 GN=Crbn PE=1 SV=1	13	3	Crbn	1.103	0.919558	High	High	High	High	High	High	High	High	High	High
High	Master Protein	Q9DC50	Peroxisomal carnitine O-octanoyltransferase OS=Mus musculus OX=10090 GN=Crot PE=1 SV=1	22	6	Crot	0.891	0.919558	High	High	High	High	High	High	High	High	High	High
High	Master Protein	Q8K0G5	EARP and GARP complex-interacting protein 1 OS=Mus musculus OX=10090 GN=Eipr1 PE=1 SV=2	48	8	Eipr1	0.917	0.919558	High	High	High	High	High	High	High	High	High	High
High	Master Protein	Q5U3K5	Rab-like protein 6 OS=Mus musculus OX=10090 GN=Rabl6 PE=1 SV=2	62	12	Rabl6	0.921	0.919558	High	High	High	High	High	High	High	High	High	High
High	Master Protein	P51830	Adenylate cyclase type 9 OS=Mus musculus OX=10090 GN=Adcy9 PE=1 SV=1	183	26	Adcy9	1.039	0.919558	High	High	High	High	High	High	High	High	High	High
High	Master Protein	Q9WV34	MAGUK p55 subfamily member 2 OS=Mus musculus OX=10090 GN=Mpp2 PE=1 SV=1	275	33	Mpp2	1.045	0.920348	High	High	High	High	High	High	High	High	High	High
High	Master Protein	H3BJR6	Sodium channel subunit beta-3 OS=Mus musculus OX=10090 GN=Scn3b PE=1 SV=1	13	2	Scn3b	0.894	0.920473	High	High	High	High	High	High	High	High	High	High
High	Master Protein	G5E8G3	Opioid-binding protein/cell adhesion molecule-like OS=Mus musculus OX=10090 GN=Opcml PE=1 SV=1	318	2	Opcml	1.047	0.920871	High	High	High	High	High	High	High	High	High	High
High	Master Protein	E0CY16	Cell adhesion molecule 1 OS=Mus musculus OX=10090 GN=Cadm1 PE=1 SV=1	162	2	Cadm1	1.074	0.920871	High	High	High	High	High	High	High	High	High	High
High	Master Protein	Q9CYL5	Golgi-associated plant pathogenesis-related protein 1 OS=Mus musculus OX=10090 GN=Glipr2 PE=1 SV=3	3	2	Glipr2	0.828	0.920871	Peak Found	Peak Found	Peak Found	High	Not Found	Peak Found	Peak Found	Peak Found	High	High
High	Master Protein	Q9CQU0	Thioredoxin domain-containing protein 12 OS=Mus musculus OX=10090 GN=Txndc12 PE=1 SV=1	18	3	Txndc12	0.919	0.920871	High	Peak Found	High	Peak Found	High	High	High	High	High	High
High	Master Protein	Q80ZS3	28S ribosomal protein S26, mitochondrial OS=Mus musculus OX=10090 GN=Mrps26 PE=1 SV=1	15	5	Mrps26	1.085	0.920871	High	Peak Found	High	Peak Found	High	High	High	High	High	High
High	Master Protein	Q61081	Hsp90 co-chaperone Cdc37 OS=Mus musculus OX=10090 GN=Cdc37 PE=1 SV=1	86	10	Cdc37	0.937	0.920871	High	High	High	High	High	High	High	High	High	High
High	Master Protein	Q99JB2	Stomatin-like protein 2, mitochondrial OS=Mus musculus OX=10090 GN=Stoml2 PE=1 SV=1	95	12	Stoml2	1.034	0.920871	High	High	High	High	High	High	High	High	High	High
High	Master Protein	G5E884	Non-specific serine/threonine protein kinase OS=Mus musculus OX=10090 GN=Pak1 PE=1 SV=1	441	19	Pak1	0.954	0.920871	High	High	High	High	High	High	High	High	High	High
High	Master Protein	Q64727	Vinculin OS=Mus musculus OX=10090 GN=Vcl PE=1 SV=4	231	37	Vcl	0.937	0.920871	High	High	High	High	High	High	High	High	High	High
High	Master Protein	Q61823	Programmed cell death protein 4 OS=Mus musculus OX=10090 GN=Pdcd4 PE=1 SV=1	2	2	Pdcd4	1.2	0.920978	Peak Found	Peak Found	Peak Found	Peak Found	High	Not Found	High	Not Found	Peak Found	Peak Found
High	Master Protein	Q9QY01	Serine/threonine-protein kinase ULK2 OS=Mus musculus OX=10090 GN=Ulk2 PE=1 SV=1	8	3	Ulk2	1.187	0.920978	High	High	High	Peak Found	Peak Found	Peak Found	High	Peak Found	High	High
High	Master Protein	Q9WV69	Dematin OS=Mus musculus OX=10090 GN=Dmtn PE=1 SV=1	194	18	Dmtn	1.035	0.920978	High	High	High	High	High	High	High	High	High	High
High	Master Protein	Q8BTI9	Phosphatidylinositol 4,5-bisphosphate 3-kinase catalytic subunit beta isoform OS=Mus musculus OX=10090 GN=Pik3cb PE=1 SV=2	8	3	Pik3cb	1.116	0.921508	High	High	High	High	Peak Found	High	Peak Found	Peak Found	Peak Found	High
High	Master Protein	Q9DCD0	6-phosphogluconate dehydrogenase, decarboxylating OS=Mus musculus OX=10090 GN=Pgd PE=1 SV=3	128	19	Pgd	0.938	0.921508	High	High	High	High	High	High	High	High	High	High
High	Master Protein	G3UZJ3	Dystrobrevin beta OS=Mus musculus OX=10090 GN=Dtnb PE=1 SV=1	29	2	Dtnb	0.889	0.921886	High	High	Not Found	Peak Found	High	High	Peak Found	High	Peak Found	High
High	Master Protein	Q8BIQ5	Cleavage stimulation factor subunit 2 OS=Mus musculus OX=10090 GN=Cstf2 PE=1 SV=2	20	2	Cstf2	1.087	0.921886	High	High	High	High	High	High	Peak Found	High	High	High
High	Master Protein	Q499E0	BMP/retinoic acid-inducible neural-specific protein 3 OS=Mus musculus OX=10090 GN=Brinp3 PE=2 SV=2	7	2	Brinp3	0.887	0.921886	High	Peak Found	High	Peak Found	Peak Found	Peak Found	High	Peak Found	Peak Found	Peak Found
High	Master Protein	Q9ESJ1	CDK5 and ABL1 enzyme substrate 1 OS=Mus musculus OX=10090 GN=Cables1 PE=1 SV=2	8	2	Cables1	1.166	0.921886	High	High	Peak Found	Peak Found	High	High	Peak Found	High	High	High
High	Master Protein	Q8C0Z1	Protein FAM234A OS=Mus musculus OX=10090 GN=Fam234a PE=1 SV=1	2	2	Fam234a	0.872	0.921886	Peak Found	Peak Found	Peak Found	Peak Found	Peak Found	High	Peak Found	High	Peak Found	Peak Found
High	Master Protein	Q5SYL3	Protein KIAA0100 OS=Mus musculus OX=10090 GN=Kiaa0100 PE=1 SV=1	2	2	Kiaa0100	0.836	0.921886	High	High	Peak Found	Peak Found	Not Found	Peak Found	Peak Found	Peak Found	Peak Found	Peak Found
High	Master Protein	Q64669	NAD(P)H dehydrogenase [quinone] 1 OS=Mus musculus OX=10090 GN=Nqo1 PE=1 SV=3	6	2	Nqo1	1.118	0.921886	Peak Found	Peak Found	Peak Found	High	Peak Found	Peak Found	Peak Found	High	High	High
High	Master Protein	E9Q3C1	C2 domain-containing protein 2 OS=Mus musculus OX=10090 GN=C2cd2 PE=1 SV=1	3	2	C2cd2	1.033	0.921886	High	Peak Found	High	Peak Found	Peak Found	Peak Found	Peak Found	High	Peak Found	Peak Found
High	Master Protein	Q9D164	FXYD domain-containing ion transport regulator 6 OS=Mus musculus OX=10090 GN=Fxyd6 PE=1 SV=2	76	3	Fxyd6	0.939	0.921886	High	High	High	High	High	High	High	High	High	High
High	Master Protein	D3Z601	Calsyntenin-3 OS=Mus musculus OX=10090 GN=Clstn3 PE=1 SV=1	16	3	Clstn3	0.886	0.921886	High	High	Peak Found	High	High	Peak Found	High	High	High	High
High	Master Protein	Q9R1K9	Centrin-2 OS=Mus musculus OX=10090 GN=Cetn2 PE=1 SV=1	17	3	Cetn2	0.918	0.921886	High	High	High	High	High	High	High	High	High	High
High	Master Protein	Q99KI3	ER membrane protein complex subunit 3 OS=Mus musculus OX=10090 GN=Emc3 PE=1 SV=3	8	3	Emc3	1.107	0.921886	High	High	High	High	High	High	Peak Found	Peak Found	High	Peak Found
High	Master Protein	E9Q6B2	Coiled-coil domain-containing protein 85C OS=Mus musculus OX=10090 GN=Ccdc85c PE=1 SV=1	4	3	Ccdc85c	1.104	0.921886	High	Peak Found	Peak Found	Peak Found	Peak Found	Peak Found	Peak Found	High	Peak Found	High
High	Master Protein	P50571	Gamma-aminobutyric acid receptor subunit beta-1 OS=Mus musculus OX=10090 GN=Gabrb1 PE=1 SV=1	31	4	Gabrb1	0.891	0.921886	High	High	High	High	Peak Found	High	High	High	High	High
High	Master Protein	Q8CAK1	Putative transferase CAF17 homolog, mitochondrial OS=Mus musculus OX=10090 GN=Iba57 PE=1 SV=1	14	4	Iba57	0.907	0.921886	High	Peak Found	High	Peak Found	Peak Found	High	High	High	High	High
High	Master Protein	Q80ZI6	E3 ubiquitin-protein ligase LRSAM1 OS=Mus musculus OX=10090 GN=Lrsam1 PE=1 SV=1	16	4	Lrsam1	1.122	0.921886	High	High	High	High	High	High	High	High	High	High
High	Master Protein	Q8K2F8	Protein LSM14 homolog A OS=Mus musculus OX=10090 GN=Lsm14a PE=1 SV=1	23	4	Lsm14a	0.901	0.921886	High	High	High	High	High	High	High	High	High	High
High	Master Protein	A1L3P4	Sodium/hydrogen exchanger OS=Mus musculus OX=10090 GN=Slc9a6 PE=1 SV=1	39	5	Slc9a6	0.919	0.921886	High	High	High	High	High	High	High	High	High	High
High	Master Protein	E9Q933	Transmembrane protein 11, mitochondrial OS=Mus musculus OX=10090 GN=Tmem11 PE=1 SV=1	35	5	Tmem11	0.921	0.921886	High	High	High	High	High	High	High	High	High	High
High	Master Protein	Q8BG51	Mitochondrial Rho GTPase 1 OS=Mus musculus OX=10090 GN=Rhot1 PE=1 SV=1	143	6	Rhot1	1.035	0.921886	High	High	High	High	High	High	High	High	High	High
High	Master Protein	Q9CPP6	NADH dehydrogenase [ubiquinone] 1 alpha subcomplex subunit 5 OS=Mus musculus OX=10090 GN=Ndufa5 PE=1 SV=3	173	6	Ndufa5	1.042	0.921886	High	High	High	High	High	High	High	High	High	High
High	Master Protein	Q80VD1	Protein FAM98B OS=Mus musculus OX=10090 GN=Fam98b PE=1 SV=1	38	6	Fam98b	0.924	0.921886	High	High	High	High	High	Peak Found	High	High	High	High
High	Master Protein	B2RW11	Ankyrin repeat domain 34A OS=Mus musculus OX=10090 GN=Ankrd34a PE=1 SV=1	22	6	Ankrd34a	0.909	0.921886	High	High	High	Peak Found	High	High	High	High	High	High
High	Master Protein	A0A0J9YUN4	Dynamin GTPase OS=Mus musculus OX=10090 GN=Dnm1 PE=1 SV=1	2053	7	Dnm1	1.046	0.921886	High	High	High	High	High	High	High	High	High	High
High	Master Protein	Q3TIR3	Synembryn-A OS=Mus musculus OX=10090 GN=Ric8a PE=1 SV=2	31	7	Ric8a	0.906	0.921886	High	High	High	High	High	High	High	High	High	High
High	Master Protein	Q8BQP9	Regulator of G-protein signaling 7-binding protein OS=Mus musculus OX=10090 GN=Rgs7bp PE=1 SV=1	43	7	Rgs7bp	1.046	0.921886	High	High	High	High	High	High	High	High	High	High
High	Master Protein	Q8BML9	Glutamine--tRNA ligase OS=Mus musculus OX=10090 GN=Qars1 PE=1 SV=1	31	7	Qars1	0.91	0.921886	High	High	High	High	High	High	High	High	High	High
High	Master Protein	P56213	FAD-linked sulfhydryl oxidase ALR OS=Mus musculus OX=10090 GN=Gfer PE=1 SV=2	41	7	Gfer	1.044	0.921886	High	High	High	High	High	High	High	High	High	High
High	Master Protein	P19253	60S ribosomal protein L13a OS=Mus musculus OX=10090 GN=Rpl13a PE=1 SV=4	39	7	Rpl13a	1.043	0.921886	High	High	High	High	High	High	High	High	High	High
High	Master Protein	Q8K341	Alpha-tubulin N-acetyltransferase 1 OS=Mus musculus OX=10090 GN=Atat1 PE=1 SV=1	35	8	Atat1	1.057	0.921886	High	High	High	High	High	High	High	High	High	High
High	Master Protein	E0CX32	Coiled-coil domain-containing protein 85A OS=Mus musculus OX=10090 GN=Ccdc85a PE=1 SV=1	41	8	Ccdc85a	1.064	0.921886	High	High	High	High	High	High	High	High	High	High
High	Master Protein	Q8R5L3	Vam6/Vps39-like protein OS=Mus musculus OX=10090 GN=Vps39 PE=1 SV=1	22	8	Vps39	1.09	0.921886	High	High	High	High	High	High	High	High	High	High
High	Master Protein	A0A494BBB0	Calcium-activated neutral proteinase 1 (Fragment) OS=Mus musculus OX=10090 GN=Capn1 PE=1 SV=1	18	9	Capn1	1.06	0.921886	High	High	High	Peak Found	High	High	High	Peak Found	High	High
High	Master Protein	Q63810	Calcineurin subunit B type 1 OS=Mus musculus OX=10090 GN=Ppp3r1 PE=1 SV=3	243	10	Ppp3r1	1.047	0.921886	High	High	High	High	High	High	High	High	High	High
High	Master Protein	Q9JKF6	Nectin-1 OS=Mus musculus OX=10090 GN=Nectin1 PE=1 SV=3	106	12	Nectin1	0.935	0.921886	High	High	High	High	High	High	High	High	High	High
High	Master Protein	Q61166	Microtubule-associated protein RP/EB family member 1 OS=Mus musculus OX=10090 GN=Mapre1 PE=1 SV=3	126	12	Mapre1	0.938	0.921886	High	High	High	High	High	High	High	High	High	High
High	Master Protein	P63094	Guanine nucleotide-binding protein G(s) subunit alpha isoforms short OS=Mus musculus OX=10090 GN=Gnas PE=1 SV=1	276	14	Gnas	0.945	0.921886	High	High	High	High	High	High	High	High	High	High
High	Master Protein	E9PUK3	Formin-binding protein 1-like OS=Mus musculus OX=10090 GN=Fnbp1l PE=1 SV=1	52	15	Fnbp1l	0.92	0.921886	High	High	High	High	High	High	High	High	High	High
High	Master Protein	P42208	Septin-2 OS=Mus musculus OX=10090 GN=Septin2 PE=1 SV=2	158	16	Septin2	1.036	0.921886	High	High	High	High	High	High	High	High	High	High
High	Master Protein	P97807	Fumarate hydratase, mitochondrial OS=Mus musculus OX=10090 GN=Fh PE=1 SV=3	330	21	Fh	1.046	0.921886	High	High	High	High	High	High	High	High	High	High
High	Master Protein	F8VPM7	ELKS/Rab6-interacting/CAST family member 1 OS=Mus musculus OX=10090 GN=Erc1 PE=1 SV=1	190	23	Erc1	1.034	0.921886	High	High	High	High	High	High	High	High	High	High
High	Master Protein	O35136	Neural cell adhesion molecule 2 OS=Mus musculus OX=10090 GN=Ncam2 PE=1 SV=1	291	30	Ncam2	0.955	0.921886	High	High	High	High	High	High	High	High	High	High
High	Master Protein	F8WIT2	Annexin OS=Mus musculus OX=10090 GN=Anxa6 PE=1 SV=1	420	42	Anxa6	0.955	0.921886	High	High	High	High	High	High	High	High	High	High
High	Master Protein	Q99P72	Reticulon-4 OS=Mus musculus OX=10090 GN=Rtn4 PE=1 SV=2	662	43	Rtn4	0.955	0.921886	High	High	High	High	High	High	High	High	High	High
High	Master Protein	G5E8J3	WD repeat-containing protein 11 OS=Mus musculus OX=10090 GN=Wdr11 PE=1 SV=1	25	7	Wdr11	0.893	0.922181	High	High	High	Peak Found	High	High	High	High	High	High
High	Master Protein	Q9D706	RNA polymerase II-associated protein 3 OS=Mus musculus OX=10090 GN=Rpap3 PE=1 SV=1	14	4	Rpap3	0.924	0.922364	Peak Found	High	Peak Found	High	Peak Found	High	High	High	High	High
High	Master Protein	P45878	Peptidyl-prolyl cis-trans isomerase FKBP2 OS=Mus musculus OX=10090 GN=Fkbp2 PE=1 SV=1	57	6	Fkbp2	0.933	0.922844	High	High	High	High	High	High	High	High	High	High
High	Master Protein	Q9JMG7	Hepatoma-derived growth factor-related protein 3 OS=Mus musculus OX=10090 GN=Hdgfl3 PE=1 SV=2	6	2	Hdgfl3	0.878	0.923307	Peak Found	Peak Found	Peak Found	Peak Found	Peak Found	Peak Found	High	Peak Found	Peak Found	Peak Found
High	Master Protein	A0A5F8MPS7	Lysosomal acid phosphatase OS=Mus musculus OX=10090 GN=Acp2 PE=1 SV=1	32	5	Acp2	1.089	0.923474	High	High	High	High	High	High	High	High	High	High
High	Master Protein	Q8BWY3	Eukaryotic peptide chain release factor subunit 1 OS=Mus musculus OX=10090 GN=Etf1 PE=1 SV=4	49	9	Etf1	1.044	0.923474	High	High	High	High	High	High	High	High	High	High
High	Master Protein	Q8CCT4	Transcription elongation factor A protein-like 5 OS=Mus musculus OX=10090 GN=Tceal5 PE=1 SV=1	37	2	Tceal5	0.919	0.924698	High	High	High	Peak Found	High	High	High	High	High	High
High	Master Protein	E9PUL6	Sodium/potassium/calcium exchanger 4 OS=Mus musculus OX=10090 GN=Slc24a4 PE=1 SV=1	14	2	Slc24a4	0.893	0.924698	High	High	High	High	High	High	High	High	Peak Found	High
High	Master Protein	D3Z6B9	Formyltetrahydrofolate dehydrogenase OS=Mus musculus OX=10090 GN=Aldh1l2 PE=1 SV=1	27	2	Aldh1l2	1.115	0.924698	High	Peak Found	Peak Found	Peak Found	Peak Found	High	Peak Found	Peak Found	Peak Found	High
High	Master Protein	Q9CWW6	Peptidyl-prolyl cis-trans isomerase NIMA-interacting 4 OS=Mus musculus OX=10090 GN=Pin4 PE=1 SV=1	5	2	Pin4	0.889	0.924698	High	High	Peak Found	High	High	Peak Found	Peak Found	Peak Found	High	Peak Found
High	Master Protein	Q80Y56	Rabenosyn-5 OS=Mus musculus OX=10090 GN=Rbsn PE=1 SV=1	18	5	Rbsn	0.907	0.924698	High	Peak Found	High	High	High	High	High	High	High	High
High	Master Protein	E9QND8	Atlastin-2 OS=Mus musculus OX=10090 GN=Atl2 PE=1 SV=1	43	7	Atl2	0.922	0.924698	High	High	High	High	High	High	High	High	High	High
High	Master Protein	Q91YI0	Argininosuccinate lyase OS=Mus musculus OX=10090 GN=Asl PE=1 SV=1	50	7	Asl	0.92	0.924698	High	High	High	High	High	High	High	High	High	High
High	Master Protein	Q8BLF1	Neutral cholesterol ester hydrolase 1 OS=Mus musculus OX=10090 GN=Nceh1 PE=1 SV=1	120	12	Nceh1	1.032	0.924698	High	High	High	High	High	High	High	High	High	High
High	Master Protein	Q9EPL8	Importin-7 OS=Mus musculus OX=10090 GN=Ipo7 PE=1 SV=2	92	18	Ipo7	1.031	0.924698	High	High	High	High	High	High	High	High	High	High
High	Master Protein	A0A1Y7VIR0	Serine/threonine-protein phosphatase 2A 56 kDa regulatory subunit gamma isoform (Fragment) OS=Mus musculus OX=10090 GN=Ppp2r5c PE=1 SV=1	52	5	Ppp2r5c	1.057	0.92519	High	High	High	High	High	High	High	High	High	High
High	Master Protein	Q9CX80	Cytoglobin OS=Mus musculus OX=10090 GN=Cygb PE=1 SV=1	32	7	Cygb	0.924	0.92519	High	High	High	High	High	High	High	High	High	High
High	Master Protein	Q9D0R2	Threonine--tRNA ligase 1, cytoplasmic OS=Mus musculus OX=10090 GN=Tars1 PE=1 SV=2	88	19	Tars1	0.926	0.926026	High	High	High	High	High	High	High	High	High	High
High	Master Protein	P35290	Ras-related protein Rab-24 OS=Mus musculus OX=10090 GN=Rab24 PE=1 SV=2	41	5	Rab24	1.038	0.926346	High	High	High	High	High	High	High	High	High	High
High	Master Protein	P97797	Tyrosine-protein phosphatase non-receptor type substrate 1 OS=Mus musculus OX=10090 GN=Sirpa PE=1 SV=2	423	14	Sirpa	1.045	0.926346	High	High	High	High	High	High	High	High	High	High
High	Master Protein	G3UWV4	Serine/threonine-protein kinase BRSK2 OS=Mus musculus OX=10090 GN=Brsk2 PE=1 SV=1	145	2	Brsk2	0.937	0.926408	High	Peak Found	Peak Found	High	Peak Found	Peak Found	High	High	High	High
High	Master Protein	F6WR04	Cathepsin S OS=Mus musculus OX=10090 GN=Ctss PE=1 SV=1	11	4	Ctss	1.1	0.926408	High	Peak Found	High	Peak Found	High	High	High	High	Peak Found	High
High	Master Protein	Q505D1	Serine/threonine-protein phosphatase 6 regulatory ankyrin repeat subunit A OS=Mus musculus OX=10090 GN=Ankrd28 PE=1 SV=1	20	6	Ankrd28	1.06	0.926408	High	High	High	High	High	High	High	High	High	High
High	Master Protein	Q9CXW2	28S ribosomal protein S22, mitochondrial OS=Mus musculus OX=10090 GN=Mrps22 PE=1 SV=1	37	6	Mrps22	1.041	0.926408	High	High	High	High	High	High	High	High	High	High
High	Master Protein	Q5GH67	XK-related protein 4 OS=Mus musculus OX=10090 GN=Xkr4 PE=1 SV=1	18	6	Xkr4	1.042	0.926408	High	High	High	High	High	High	High	High	High	Peak Found
High	Master Protein	A0A087WP33	Autophagy-related protein 9 (Fragment) OS=Mus musculus OX=10090 GN=Atg9a PE=1 SV=1	59	7	Atg9a	1.06	0.926408	High	High	High	High	High	High	High	High	High	High
High	Master Protein	Q6V4S5	Protein sidekick-2 OS=Mus musculus OX=10090 GN=Sdk2 PE=1 SV=1	18	7	Sdk2	1.086	0.926408	High	High	High	High	High	Peak Found	High	High	High	High
High	Master Protein	E9QNY8	Sacsin OS=Mus musculus OX=10090 GN=Sacs PE=1 SV=1	29	14	Sacs	1.066	0.926408	High	High	High	High	High	High	High	High	High	High
High	Master Protein	Q62159	Rho-related GTP-binding protein RhoC OS=Mus musculus OX=10090 GN=Rhoc PE=1 SV=2	159	2	Rhoc	0.881	0.926612	Peak Found	Peak Found	High	Peak Found	High	Peak Found	Peak Found	High	High	Peak Found
High	Master Protein	Q8CC35	Synaptopodin OS=Mus musculus OX=10090 GN=Synpo PE=1 SV=2	356	25	Synpo	1.045	0.926612	High	High	High	High	High	High	High	High	High	High
High	Master Protein	E9QM90	RAB11-binding protein RELCH OS=Mus musculus OX=10090 GN=Relch PE=1 SV=2	234	33	Relch	0.943	0.926612	High	High	High	High	High	High	High	High	High	High
High	Master Protein	E9QP44	Arf-GAP with Rho-GAP domain, ANK repeat and PH domain-containing protein 2 OS=Mus musculus OX=10090 GN=Arap2 PE=1 SV=1	2	2	Arap2	1.196	0.927057	Peak Found	High	Peak Found	Peak Found	Peak Found	Peak Found	High	Peak Found	Peak Found	Peak Found
High	Master Protein	Q9WTR5	Cadherin-13 OS=Mus musculus OX=10090 GN=Cdh13 PE=1 SV=2	101	10	Cdh13	0.94	0.927057	High	High	High	High	High	High	High	High	High	High
High	Master Protein	A0A087WS83	Voltage-dependent R-type calcium channel subunit alpha OS=Mus musculus OX=10090 GN=Cacna1e PE=1 SV=1	174	33	Cacna1e	0.937	0.927866	High	High	High	High	High	High	High	High	High	High
High	Master Protein	P43274	Histone H1.4 OS=Mus musculus OX=10090 GN=H1-4 PE=1 SV=2	42	2	H1-4	0.907	0.927982	High	Peak Found	High	High	High	High	High	High	High	High
High	Master Protein	F8WHW3	Phosphatidylinositol-4,5-bisphosphate 4-phosphatase OS=Mus musculus OX=10090 GN=Pip4p1 PE=1 SV=1	23	3	Pip4p1	1.066	0.927982	High	High	High	High	High	High	High	High	High	High
High	Master Protein	Q9Z127	Large neutral amino acids transporter small subunit 1 OS=Mus musculus OX=10090 GN=Slc7a5 PE=1 SV=2	35	4	Slc7a5	1.04	0.927982	High	High	High	High	High	High	High	High	High	High
High	Master Protein	Q9JJY3	Sphingomyelin phosphodiesterase 3 OS=Mus musculus OX=10090 GN=Smpd3 PE=1 SV=1	46	10	Smpd3	1.04	0.927982	High	High	High	High	High	High	High	High	High	High
High	Master Protein	Q9CQU3	Protein RER1 OS=Mus musculus OX=10090 GN=Rer1 PE=1 SV=1	17	3	Rer1	0.917	0.928086	High	High	High	High	High	High	High	High	High	High
High	Master Protein	D3Z4S3	Putative peptidyl-tRNA hydrolase PTRHD1 OS=Mus musculus OX=10090 GN=Ptrhd1 PE=1 SV=1	10	3	Ptrhd1	0.909	0.928086	Peak Found	High	Peak Found	High	Peak Found	Peak Found	High	High	High	High
High	Master Protein	Q9D6Y9	1,4-alpha-glucan-branching enzyme OS=Mus musculus OX=10090 GN=Gbe1 PE=1 SV=1	7	5	Gbe1	0.906	0.928086	Peak Found	High	Peak Found	Peak Found	High	Peak Found	High	High	Peak Found	High
High	Master Protein	Q9EQG7	Ectonucleotide pyrophosphatase/phosphodiesterase family member 5 OS=Mus musculus OX=10090 GN=Enpp5 PE=1 SV=3	27	6	Enpp5	0.909	0.928086	High	High	High	High	High	High	High	High	High	High
High	Master Protein	Q9CR95	Adaptin ear-binding coat-associated protein 1 OS=Mus musculus OX=10090 GN=Necap1 PE=1 SV=2	188	8	Necap1	0.947	0.928086	High	High	High	High	High	High	High	High	High	High
High	Master Protein	E9Q4K3	Branched-chain-amino-acid aminotransferase OS=Mus musculus OX=10090 GN=Bcat1 PE=1 SV=1	94	9	Bcat1	0.937	0.928086	High	High	High	High	High	High	High	High	High	High
High	Master Protein	P62281	40S ribosomal protein S11 OS=Mus musculus OX=10090 GN=Rps11 PE=1 SV=3	90	9	Rps11	0.934	0.928086	High	High	High	High	High	High	High	High	High	High
High	Master Protein	O35864	COP9 signalosome complex subunit 5 OS=Mus musculus OX=10090 GN=Cops5 PE=1 SV=3	69	12	Cops5	0.928	0.928086	High	High	High	High	High	High	High	High	High	High
High	Master Protein	A0A4W9	Neuronal growth regulator 1 OS=Mus musculus OX=10090 GN=Negr1 PE=1 SV=1	244	14	Negr1	0.956	0.928086	High	High	High	High	High	High	High	High	High	High
High	Master Protein	Q3TA40	RIKEN cDNA 6430548M08 gene OS=Mus musculus OX=10090 GN=6430548M08Rik PE=1 SV=1	193	14	6430548M08Rik	0.95	0.928086	High	High	High	High	High	High	High	High	High	High
High	Master Protein	Q8BLR2	Copine-4 OS=Mus musculus OX=10090 GN=Cpne4 PE=1 SV=1	137	17	Cpne4	0.94	0.928086	High	High	High	High	High	High	High	High	High	High
High	Master Protein	Q9D7P6	Iron-sulfur cluster assembly enzyme ISCU, mitochondrial OS=Mus musculus OX=10090 GN=Iscu PE=1 SV=1	26	5	Iscu	1.052	0.928101	High	High	High	High	High	High	High	High	Peak Found	High
High	Master Protein	Q3UZG4	Aminoacyl tRNA synthase complex-interacting multifunctional protein 1 OS=Mus musculus OX=10090 GN=Aimp1 PE=1 SV=1	69	11	Aimp1	0.924	0.928101	High	High	High	High	High	High	High	High	High	High
High	Master Protein	O08797	SPI6 OS=Mus musculus OX=10090 GN=Serpinb9 PE=1 SV=1	15	6	Serpinb9	0.925	0.928515	High	High	High	High	Peak Found	Peak Found	High	High	High	High
High	Master Protein	Q9JHG6	Calcipressin-1 OS=Mus musculus OX=10090 GN=Rcan1 PE=1 SV=2	7	2	Rcan1	1.084	0.929693	Peak Found	Peak Found	Peak Found	Peak Found	Peak Found	High	High	High	High	High
High	Master Protein	Q8BH50	Uncharacterized protein C18orf25 homolog OS=Mus musculus OX=10090 PE=1 SV=1	5	2		1.178	0.929693	Peak Found	Peak Found	High	Peak Found	Peak Found	High	Peak Found	Peak Found	High	High
High	Master Protein	Q9WUR2	Enoyl-CoA delta isomerase 2 OS=Mus musculus OX=10090 GN=Eci2 PE=1 SV=2	82	10	Eci2	1.042	0.929693	High	High	High	High	High	High	High	High	High	High
High	Master Protein	Q8CCB4	Vacuolar protein sorting-associated protein 53 homolog OS=Mus musculus OX=10090 GN=Vps53 PE=1 SV=1	120	21	Vps53	1.031	0.929693	High	High	High	High	High	High	High	High	High	High
High	Master Protein	Q8K0C4	Lanosterol 14-alpha demethylase OS=Mus musculus OX=10090 GN=Cyp51a1 PE=1 SV=1	9	5	Cyp51a1	1.085	0.92982	High	Peak Found	Peak Found	High	Peak Found	Peak Found	High	High	High	Peak Found
High	Master Protein	G5E895	Aldo-keto reductase family 1, member B10 (aldose reductase) OS=Mus musculus OX=10090 GN=Akr1b10 PE=1 SV=1	67	9	Akr1b10	0.928	0.92982	High	High	High	High	High	High	High	High	High	High
High	Master Protein	Q8R0F8	Acylpyruvase FAHD1, mitochondrial OS=Mus musculus OX=10090 GN=Fahd1 PE=1 SV=2	55	7	Fahd1	1.039	0.930121	High	High	High	High	High	High	High	High	High	High
High	Master Protein	E9PV86	Multiple C2 and transmembrane domain-containing protein 1 OS=Mus musculus OX=10090 GN=Mctp1 PE=1 SV=1	3	3	Mctp1	0.92	0.930213	High	Peak Found	Peak Found	Peak Found	Peak Found	Peak Found	Peak Found	High	High	Peak Found
High	Master Protein	Q5RL20	39S ribosomal protein L43, mitochondrial OS=Mus musculus OX=10090 GN=Mrpl43 PE=1 SV=1	21	5	Mrpl43	1.085	0.930213	High	High	High	High	High	High	Peak Found	High	High	High
High	Master Protein	A0A0R4J0B8	Endophilin-A3 OS=Mus musculus OX=10090 GN=Sh3gl3 PE=1 SV=1	114	13	Sh3gl3	0.937	0.930213	High	High	High	High	High	High	High	High	High	High
High	Master Protein	Q8R5M8	Cell adhesion molecule 1 OS=Mus musculus OX=10090 GN=Cadm1 PE=1 SV=2	178	2	Cadm1	0.953	0.930514	High	High	High	High	High	High	High	High	High	High
High	Master Protein	A2AJ26	ATP-binding cassette sub-family A member 2 OS=Mus musculus OX=10090 GN=Abca2 PE=1 SV=1	4	2	Abca2	0.882	0.930514	High	Peak Found	Peak Found	Peak Found	High	High	Peak Found	Peak Found	Peak Found	High
High	Master Protein	J3JS94	EKC/KEOPS complex subunit Lage3 OS=Mus musculus OX=10090 GN=Lage3 PE=1 SV=1	3	2	Lage3	0.836	0.930514	Peak Found	High	High	Peak Found	Peak Found	Not Found	Peak Found	High	Peak Found	Peak Found
High	Master Protein	Q8R1Y2	bMERB domain-containing protein 1 OS=Mus musculus OX=10090 GN=Bmerb1 PE=1 SV=1	19	3	Bmerb1	0.91	0.930514	High	High	High	High	High	High	High	High	High	High
High	Master Protein	Q8C190	VPS9 domain-containing protein 1 OS=Mus musculus OX=10090 GN=Vps9d1 PE=1 SV=1	4	3	Vps9d1	1.159	0.930514	Peak Found	High	Not Found	Peak Found	Peak Found	Peak Found	High	Peak Found	Peak Found	High
High	Master Protein	H3BJH7	Aftiphilin OS=Mus musculus OX=10090 GN=Aftph PE=1 SV=1	10	6	Aftph	1.08	0.930514	Peak Found	High	High	Peak Found	High	High	High	High	High	High
High	Master Protein	Q9JK48	Endophilin-B1 OS=Mus musculus OX=10090 GN=Sh3glb1 PE=1 SV=1	89	8	Sh3glb1	1.031	0.930514	High	High	High	High	High	High	High	High	High	High
High	Master Protein	P42669	Transcriptional activator protein Pur-alpha OS=Mus musculus OX=10090 GN=Pura PE=1 SV=1	182	9	Pura	0.957	0.930514	High	High	High	High	High	High	High	High	High	High
High	Master Protein	Q9DCM0	Persulfide dioxygenase ETHE1, mitochondrial OS=Mus musculus OX=10090 GN=Ethe1 PE=1 SV=2	62	9	Ethe1	1.035	0.930514	High	High	High	High	High	High	High	High	High	High
High	Master Protein	Q9R0H0	Peroxisomal acyl-coenzyme A oxidase 1 OS=Mus musculus OX=10090 GN=Acox1 PE=1 SV=5	27	9	Acox1	0.926	0.930514	High	High	High	High	High	High	High	High	High	High
High	Master Protein	Q8JZP2	Synapsin-3 OS=Mus musculus OX=10090 GN=Syn3 PE=1 SV=2	145	15	Syn3	0.934	0.930514	High	High	High	High	High	High	High	High	High	High
High	Master Protein	Q8C7R4	Ubiquitin-like modifier-activating enzyme 6 OS=Mus musculus OX=10090 GN=Uba6 PE=1 SV=1	62	20	Uba6	0.927	0.930514	High	High	High	High	High	High	High	High	High	High
High	Master Protein	P39447	Tight junction protein ZO-1 OS=Mus musculus OX=10090 GN=Tjp1 PE=1 SV=2	120	26	Tjp1	1.041	0.930514	High	High	High	High	High	High	High	High	High	High
High	Master Protein	Q9Z2Y3	Homer protein homolog 1 OS=Mus musculus OX=10090 GN=Homer1 PE=1 SV=2	397	28	Homer1	1.044	0.930514	High	High	High	High	High	High	High	High	High	High
High	Master Protein	O08599	Syntaxin-binding protein 1 OS=Mus musculus OX=10090 GN=Stxbp1 PE=1 SV=2	2033	49	Stxbp1	1.044	0.930514	High	High	High	High	High	High	High	High	High	High
High	Master Protein	Q03717	Potassium voltage-gated channel subfamily B member 1 OS=Mus musculus OX=10090 GN=Kcnb1 PE=1 SV=2	41	9	Kcnb1	1.056	0.931156	High	High	High	High	High	High	High	High	High	High
High	Master Protein	Q9QYI4	DnaJ homolog subfamily B member 12 OS=Mus musculus OX=10090 GN=Dnajb12 PE=1 SV=2	13	3	Dnajb12	1.095	0.931403	High	High	Peak Found	High	High	High	High	High	High	High
High	Master Protein	Q8R3R8	Gamma-aminobutyric acid receptor-associated protein-like 1 OS=Mus musculus OX=10090 GN=Gabarapl1 PE=1 SV=2	58	4	Gabarapl1	1.041	0.931403	High	High	High	High	High	High	High	High	High	High
High	Master Protein	Q5RJI5	Serine/threonine-protein kinase BRSK1 OS=Mus musculus OX=10090 GN=Brsk1 PE=1 SV=1	157	22	Brsk1	0.941	0.93171	High	High	High	High	High	High	High	High	High	High
High	Master Protein	H3BLG5	Syntenin-1 (Fragment) OS=Mus musculus OX=10090 GN=Sdcbp PE=1 SV=1	13	2	Sdcbp	0.886	0.931881	High	High	High	High	High	High	High	High	High	High
High	Master Protein	Q6ZQ29	Serine/threonine-protein kinase TAO2 OS=Mus musculus OX=10090 GN=Taok2 PE=1 SV=3	28	5	Taok2	1.083	0.931881	High	High	High	High	High	High	High	High	High	High
High	Master Protein	Q99KI0	Aconitate hydratase, mitochondrial OS=Mus musculus OX=10090 GN=Aco2 PE=1 SV=1	1460	51	Aco2	1.044	0.931881	High	High	High	High	High	High	High	High	High	High
High	Master Protein	P61202	COP9 signalosome complex subunit 2 OS=Mus musculus OX=10090 GN=Cops2 PE=1 SV=1	178	3	Cops2	1.035	0.931945	High	High	High	High	High	High	High	High	High	High
High	Master Protein	Q62165	Dystroglycan OS=Mus musculus OX=10090 GN=Dag1 PE=1 SV=4	33	7	Dag1	1.041	0.931979	High	High	High	High	High	High	High	High	High	High
High	Master Protein	Q9CYK1	Tryptophan--tRNA ligase, mitochondrial OS=Mus musculus OX=10090 GN=Wars2 PE=1 SV=2	15	4	Wars2	1.055	0.931985	High	High	High	High	High	High	High	High	High	High
High	Master Protein	Q6P8X1	Sorting nexin-6 OS=Mus musculus OX=10090 GN=Snx6 PE=1 SV=2	63	11	Snx6	1.032	0.932259	High	High	High	High	High	High	High	High	High	High
High	Master Protein	O08576	RUN domain-containing protein 3A OS=Mus musculus OX=10090 GN=Rundc3a PE=1 SV=1	53	11	Rundc3a	0.939	0.933338	High	High	High	High	High	High	High	High	High	High
High	Master Protein	Q8C1B7	Septin-11 OS=Mus musculus OX=10090 GN=Septin11 PE=1 SV=4	469	17	Septin11	0.957	0.933338	High	High	High	High	High	High	High	High	High	High
High	Master Protein	Q9QZ06	Toll-interacting protein OS=Mus musculus OX=10090 GN=Tollip PE=1 SV=1	110	14	Tollip	0.941	0.934309	High	High	High	High	High	High	High	High	High	High
High	Master Protein	Q8BFQ8	Glutamine amidotransferase-like class 1 domain-containing protein 1 OS=Mus musculus OX=10090 GN=Gatd1 PE=1 SV=1	52	7	Gatd1	0.928	0.934576	High	High	High	High	High	High	High	High	High	High
High	Master Protein	P21956	Lactadherin OS=Mus musculus OX=10090 GN=Mfge8 PE=1 SV=3	7	3	Mfge8	0.894	0.934658	High	High	High	Peak Found	High	High	Peak Found	Peak Found	High	Peak Found
High	Master Protein	Q8CJG0	Protein argonaute-2 OS=Mus musculus OX=10090 GN=Ago2 PE=1 SV=3	51	9	Ago2	0.927	0.934735	High	High	High	High	High	High	High	High	High	High
High	Master Protein	Q80TE4	Signal-induced proliferation-associated 1-like protein 2 OS=Mus musculus OX=10090 GN=Sipa1l2 PE=1 SV=3	6	2	Sipa1l2	1.184	0.93489	Peak Found	Peak Found	High	Peak Found	Peak Found	Peak Found	Peak Found	Peak Found	Peak Found	High
High	Master Protein	P42227	Signal transducer and activator of transcription 3 OS=Mus musculus OX=10090 GN=Stat3 PE=1 SV=2	15	4	Stat3	1.105	0.93489	High	High	High	High	High	Peak Found	High	High	High	High
High	Master Protein	Q61626	Glutamate receptor ionotropic, kainate 5 OS=Mus musculus OX=10090 GN=Grik5 PE=2 SV=2	6	5	Grik5	0.915	0.93489	High	Peak Found	High	Peak Found	Peak Found	High	High	High	Peak Found	Peak Found
High	Master Protein	P09470	Angiotensin-converting enzyme OS=Mus musculus OX=10090 GN=Ace PE=1 SV=3	3	2	Ace	0.84	0.935211	High	Peak Found	Not Found	Peak Found	High	Peak Found	Peak Found	High	Peak Found	Peak Found
High	Master Protein	Q8K2C7	Protein OS-9 OS=Mus musculus OX=10090 GN=Os9 PE=1 SV=2	5	2	Os9	1.136	0.935215	Peak Found	Peak Found	Peak Found	Peak Found	High	Peak Found	High	High	High	High
High	Master Protein	Q8BRK9	Alpha-mannosidase 2x OS=Mus musculus OX=10090 GN=Man2a2 PE=1 SV=2	2	2	Man2a2	0.841	0.935215	Not Found	Peak Found	Peak Found	Peak Found	Peak Found	Not Found	Not Found	High	High	Not Found
High	Master Protein	Q3U2V3	8-oxo-dGDP phosphatase NUDT18 OS=Mus musculus OX=10090 GN=Nudt18 PE=1 SV=1	4	3	Nudt18	1.086	0.935215	Peak Found	High	Peak Found	Peak Found	High	High	Peak Found	High	Peak Found	Peak Found
High	Master Protein	A0A0R4J0S3	Reticulon-4-interacting protein 1, mitochondrial OS=Mus musculus OX=10090 GN=Rtn4ip1 PE=1 SV=1	25	8	Rtn4ip1	0.927	0.935215	High	High	High	High	High	High	High	High	High	High
High	Master Protein	Q80TL7	Protein MON2 homolog OS=Mus musculus OX=10090 GN=Mon2 PE=1 SV=2	40	14	Mon2	0.927	0.935215	High	High	High	High	High	High	High	High	High	High
High	Master Protein	Q9QZF2	Glypican-1 OS=Mus musculus OX=10090 GN=Gpc1 PE=1 SV=1	132	20	Gpc1	0.933	0.935215	High	High	High	High	High	High	High	High	High	High
High	Master Protein	Q8VDQ8	NAD-dependent protein deacetylase sirtuin-2 OS=Mus musculus OX=10090 GN=Sirt2 PE=1 SV=2	271	25	Sirt2	1.043	0.935215	High	High	High	High	High	High	High	High	High	High
High	Master Protein	Q9Z0G0	PDZ domain-containing protein GIPC1 OS=Mus musculus OX=10090 GN=Gipc1 PE=1 SV=1	48	11	Gipc1	1.046	0.935925	High	High	High	High	High	High	High	High	High	High
High	Master Protein	E9PYH2	Cytosolic acyl coenzyme A thioester hydrolase OS=Mus musculus OX=10090 GN=Acot7 PE=1 SV=1	160	13	Acot7	0.958	0.935925	High	High	High	High	High	High	High	High	High	High
High	Master Protein	O88342	WD repeat-containing protein 1 OS=Mus musculus OX=10090 GN=Wdr1 PE=1 SV=3	371	29	Wdr1	0.958	0.935925	High	High	High	High	High	High	High	High	High	High
High	Master Protein	Q0PMG2	MAM domain-containing glycosylphosphatidylinositol anchor protein 1 OS=Mus musculus OX=10090 GN=Mdga1 PE=2 SV=3	3	2	Mdga1	1.156	0.935942	Peak Found	Peak Found	Peak Found	Peak Found	Peak Found	High	Peak Found	High	Peak Found	High
High	Master Protein	Q9DCG9	Multifunctional methyltransferase subunit TRM112-like protein OS=Mus musculus OX=10090 GN=Trmt112 PE=1 SV=1	3	2	Trmt112	0.893	0.935942	Peak Found	Peak Found	Peak Found	Peak Found	High	High	Peak Found	Peak Found	Peak Found	High
High	Master Protein	Q7TNC4	Putative RNA-binding protein Luc7-like 2 OS=Mus musculus OX=10090 GN=Luc7l2 PE=1 SV=1	3	2	Luc7l2	0.884	0.935942	Peak Found	Peak Found	Peak Found	Peak Found	Peak Found	High	Peak Found	High	Peak Found	High
High	Master Protein	Q3UUQ7	GPI inositol-deacylase OS=Mus musculus OX=10090 GN=Pgap1 PE=1 SV=3	16	4	Pgap1	0.886	0.935942	High	High	High	High	High	Peak Found	High	High	High	High
High	Master Protein	Q91WG4	Elongator complex protein 2 OS=Mus musculus OX=10090 GN=Elp2 PE=1 SV=1	8	5	Elp2	1.107	0.935942	High	High	High	Peak Found	Peak Found	High	Peak Found	High	High	Peak Found
High	Master Protein	Q80W21	Glutathione S-transferase Mu 7 OS=Mus musculus OX=10090 GN=Gstm7 PE=1 SV=1	109	6	Gstm7	0.911	0.935942	High	High	Peak Found	Peak Found	Peak Found	High	High	High	High	High
High	Master Protein	P14131	40S ribosomal protein S16 OS=Mus musculus OX=10090 GN=Rps16 PE=1 SV=4	68	7	Rps16	0.934	0.935942	High	High	High	High	High	High	High	High	High	High
High	Master Protein	F6Y616	Polyadenylate-binding protein-interacting protein 1 OS=Mus musculus OX=10090 GN=Paip1 PE=1 SV=2	33	7	Paip1	0.93	0.935942	High	High	High	High	High	High	High	High	High	High
High	Master Protein	K3W4Q8	Basigin OS=Mus musculus OX=10090 GN=Bsg PE=1 SV=1	118	10	Bsg	1.034	0.935942	High	High	High	High	High	High	High	High	High	High
High	Master Protein	Q8C6E0	Cilia- and flagella-associated protein 36 OS=Mus musculus OX=10090 GN=Cfap36 PE=1 SV=1	32	10	Cfap36	1.057	0.935942	High	High	High	High	High	High	High	High	High	High
High	Master Protein	Q8C522	Endonuclease domain-containing 1 protein OS=Mus musculus OX=10090 GN=Endod1 PE=1 SV=2	87	11	Endod1	0.939	0.935942	High	High	High	High	High	High	High	High	High	High
High	Master Protein	P00920	Carbonic anhydrase 2 OS=Mus musculus OX=10090 GN=Ca2 PE=1 SV=4	258	12	Ca2	0.958	0.935942	High	High	High	High	High	High	High	High	High	High
High	Master Protein	Q5JC28	Epidermal growth factor receptor pathway substrate 15 isoform B OS=Mus musculus OX=10090 GN=Eps15 PE=1 SV=1	73	15	Eps15	1.054	0.935942	High	High	High	High	High	High	High	High	High	High
High	Master Protein	Q9CR68	Cytochrome b-c1 complex subunit Rieske, mitochondrial OS=Mus musculus OX=10090 GN=Uqcrfs1 PE=1 SV=1	344	19	Uqcrfs1	1.043	0.935942	High	High	High	High	High	High	High	High	High	High
High	Master Protein	Q04735	Cyclin-dependent kinase 16 OS=Mus musculus OX=10090 GN=Cdk16 PE=1 SV=1	31	4	Cdk16	1.074	0.936122	Peak Found	High	High	High	Peak Found	High	High	High	High	High
High	Master Protein	Q8BYM8	Probable cysteine--tRNA ligase, mitochondrial OS=Mus musculus OX=10090 GN=Cars2 PE=1 SV=2	18	7	Cars2	1.081	0.936122	High	Peak Found	High	Peak Found	High	High	Peak Found	High	High	High
High	Master Protein	Q8K354	Carbonyl reductase [NADPH] 3 OS=Mus musculus OX=10090 GN=Cbr3 PE=1 SV=1	121	16	Cbr3	0.94	0.936122	High	High	High	High	High	High	High	High	High	High
High	Master Protein	Q6XE40	MAGUK p55 subfamily member 3 OS=Mus musculus OX=10090 GN=Mpp3 PE=1 SV=1	151	23	Mpp3	1.03	0.936122	High	High	High	High	High	High	High	High	High	High
High	Master Protein	P50516	V-type proton ATPase catalytic subunit A OS=Mus musculus OX=10090 GN=Atp6v1a PE=1 SV=2	1137	49	Atp6v1a	0.958	0.936122	High	High	High	High	High	High	High	High	High	High
High	Master Protein	Q8VE11	Myotubularin-related protein 6 OS=Mus musculus OX=10090 GN=Mtmr6 PE=1 SV=1	8	3	Mtmr6	0.893	0.936338	Peak Found	High	High	High	High	Peak Found	Peak Found	High	Peak Found	Peak Found
High	Master Protein	Q9D6K8	FUN14 domain-containing protein 2 OS=Mus musculus OX=10090 GN=Fundc2 PE=1 SV=1	25	4	Fundc2	1.079	0.938054	High	High	High	High	High	High	High	High	High	High
High	Master Protein	Q80UK0	SEC14 domain and spectrin repeat-containing protein 1 OS=Mus musculus OX=10090 GN=Sestd1 PE=1 SV=1	36	9	Sestd1	0.916	0.938354	High	High	High	High	High	High	High	High	High	High
High	Master Protein	Q3TWI9	CSC1-like protein 2 OS=Mus musculus OX=10090 GN=Tmem63b PE=1 SV=1	5	2	Tmem63b	0.887	0.938376	High	Peak Found	High	Peak Found	High	High	High	Not Found	Not Found	Peak Found
High	Master Protein	Q3V188	Poly(U)-specific endoribonuclease OS=Mus musculus OX=10090 GN=Endou PE=2 SV=1	3	2	Endou	0.844	0.938376	Not Found	Peak Found	High	High	Peak Found	Peak Found	Not Found	High	Peak Found	Not Found
High	Master Protein	Q62288	Testican-1 OS=Mus musculus OX=10090 GN=Spock1 PE=2 SV=2	16	4	Spock1	0.896	0.938376	High	High	High	High	High	High	High	High	High	High
High	Master Protein	Q3SXD3	5'-deoxynucleotidase HDDC2 OS=Mus musculus OX=10090 GN=Hddc2 PE=1 SV=1	22	7	Hddc2	0.913	0.938376	Peak Found	High	Peak Found	Peak Found	High	High	High	High	High	High
High	Master Protein	Q3TIV5	Zinc finger CCCH domain-containing protein 15 OS=Mus musculus OX=10090 GN=Zc3h15 PE=1 SV=2	26	7	Zc3h15	0.91	0.938376	High	High	High	High	High	High	High	High	High	High
High	Master Protein	Q3TDN2	FAS-associated factor 2 OS=Mus musculus OX=10090 GN=Faf2 PE=1 SV=2	63	11	Faf2	1.042	0.938376	High	High	High	High	High	High	High	High	High	High
High	Master Protein	Q99KC8	von Willebrand factor A domain-containing protein 5A OS=Mus musculus OX=10090 GN=Vwa5a PE=1 SV=2	75	12	Vwa5a	0.928	0.938376	High	High	High	High	High	High	High	High	High	High
High	Master Protein	Q9CQF0	39S ribosomal protein L11, mitochondrial OS=Mus musculus OX=10090 GN=Mrpl11 PE=1 SV=1	23	4	Mrpl11	1.082	0.939295	High	Peak Found	High	High	High	High	High	High	High	High
High	Master Protein	E9QM38	Solute carrier family 12 member 2 OS=Mus musculus OX=10090 GN=Slc12a2 PE=1 SV=1	118	22	Slc12a2	1.03	0.939295	High	High	High	High	High	High	High	High	High	High
High	Master Protein	Q99LG4	Tetratricopeptide repeat protein 5 OS=Mus musculus OX=10090 GN=Ttc5 PE=1 SV=2	2	2	Ttc5	1.17	0.939682	Not Found	Peak Found	High	Peak Found	Not Found	Peak Found	Peak Found	Not Found	Not Found	High
High	Master Protein	E9Q968	Pituitary adenylate cyclase-activating polypeptide type I receptor OS=Mus musculus OX=10090 GN=Adcyap1r1 PE=1 SV=1	9	2	Adcyap1r1	0.912	0.939682	High	High	High	High	Peak Found	High	Peak Found	High	Peak Found	High
High	Master Protein	A0A087WPF5	AN1-type zinc finger protein 2B (Fragment) OS=Mus musculus OX=10090 GN=Zfand2b PE=1 SV=1	21	3	Zfand2b	1.081	0.939682	High	High	High	High	High	High	High	High	High	High
High	Master Protein	P60191	Regulating synaptic membrane exocytosis protein 4 OS=Mus musculus OX=10090 GN=Rims4 PE=1 SV=1	9	3	Rims4	1.055	0.939682	High	High	High	Peak Found	Peak Found	High	High	High	High	Peak Found
High	Master Protein	Q62086	Serum paraoxonase/arylesterase 2 OS=Mus musculus OX=10090 GN=Pon2 PE=1 SV=2	21	4	Pon2	1.08	0.939682	High	High	High	High	High	High	High	High	High	High
High	Master Protein	Q9WUA2	Phenylalanine--tRNA ligase beta subunit OS=Mus musculus OX=10090 GN=Farsb PE=1 SV=2	94	16	Farsb	1.033	0.939682	High	High	High	High	High	High	High	High	High	High
High	Master Protein	E9Q6A0	Roundabout homolog 2 OS=Mus musculus OX=10090 GN=Robo2 PE=1 SV=1	71	19	Robo2	0.937	0.939682	High	High	High	High	High	High	High	High	High	High
High	Master Protein	Q9QVP9	Protein-tyrosine kinase 2-beta OS=Mus musculus OX=10090 GN=Ptk2b PE=1 SV=2	238	36	Ptk2b	0.94	0.939682	High	High	High	High	High	High	High	High	High	High
High	Master Protein	P28663	Beta-soluble NSF attachment protein OS=Mus musculus OX=10090 GN=Napb PE=1 SV=2	451	23	Napb	0.958	0.93976	High	High	High	High	High	High	High	High	High	High
High	Master Protein	E0CYE2	Inosine-5'-monophosphate dehydrogenase OS=Mus musculus OX=10090 GN=Impdh1 PE=1 SV=1	2	2	Impdh1	1.091	0.940114	Peak Found	Peak Found	Peak Found	Peak Found	High	High	Peak Found	Peak Found	Peak Found	Peak Found
High	Master Protein	Q9CWD3	Nucleoside diphosphate-linked moiety X motif 17 OS=Mus musculus OX=10090 GN=Nudt17 PE=2 SV=1	3	2	Nudt17	1.107	0.940114	High	High	Not Found	Not Found	Not Found	Not Found	High	Not Found	Not Found	Peak Found
High	Master Protein	V9GXK0	Predicted gene 12117 OS=Mus musculus OX=10090 GN=Gm12117 PE=3 SV=1	4	2	Gm12117	1.178	0.940114	Peak Found	High	Peak Found	High	High	Peak Found	Peak Found	Peak Found	Peak Found	High
High	Master Protein	P70698	CTP synthase 1 OS=Mus musculus OX=10090 GN=Ctps1 PE=1 SV=2	8	3	Ctps1	0.891	0.940114	High	High	Peak Found	High	Peak Found	High	Peak Found	High	Peak Found	High
High	Master Protein	Q80WW9	DDRGK domain-containing protein 1 OS=Mus musculus OX=10090 GN=Ddrgk1 PE=1 SV=2	5	3	Ddrgk1	0.861	0.940114	Peak Found	Peak Found	High	High	Peak Found	Peak Found	Peak Found	High	Peak Found	High
High	Master Protein	O70172	Phosphatidylinositol 5-phosphate 4-kinase type-2 alpha OS=Mus musculus OX=10090 GN=Pip4k2a PE=1 SV=1	126	5	Pip4k2a	1.029	0.940114	High	High	High	High	High	High	High	High	High	High
High	Master Protein	P57716	Nicastrin OS=Mus musculus OX=10090 GN=Ncstn PE=1 SV=3	24	5	Ncstn	0.928	0.940114	High	High	High	High	High	High	High	High	High	High
High	Master Protein	P19157	Glutathione S-transferase P 1 OS=Mus musculus OX=10090 GN=Gstp1 PE=1 SV=2	256	12	Gstp1	0.958	0.940114	High	High	High	High	High	High	High	High	High	High
High	Master Protein	Q9QZX7	Serine racemase OS=Mus musculus OX=10090 GN=Srr PE=1 SV=1	143	12	Srr	0.946	0.940114	High	High	High	High	High	High	High	High	High	High
High	Master Protein	Q99LR1	Lysophosphatidylserine lipase ABHD12 OS=Mus musculus OX=10090 GN=Abhd12 PE=1 SV=2	140	16	Abhd12	0.942	0.940114	High	High	High	High	High	High	High	High	High	High
High	Master Protein	Q9QYF9	Protein NDRG3 OS=Mus musculus OX=10090 GN=Ndrg3 PE=1 SV=1	189	18	Ndrg3	0.948	0.940114	High	High	High	High	High	High	High	High	High	High
High	Master Protein	E9PU87	Non-specific serine/threonine protein kinase OS=Mus musculus OX=10090 GN=Sik3 PE=1 SV=1	94	18	Sik3	0.928	0.940114	High	High	High	High	High	High	High	High	High	High
High	Master Protein	Q8R4H2	Rho guanine nucleotide exchange factor 12 OS=Mus musculus OX=10090 GN=Arhgef12 PE=1 SV=2	98	21	Arhgef12	1.033	0.940114	High	High	High	High	High	High	High	High	High	High
High	Master Protein	O35954	Membrane-associated phosphatidylinositol transfer protein 1 OS=Mus musculus OX=10090 GN=Pitpnm1 PE=1 SV=1	135	25	Pitpnm1	0.936	0.940114	High	High	High	High	High	High	High	High	High	High
High	Master Protein	D3Z4U5	Janus kinase and microtubule-interacting protein 1 OS=Mus musculus OX=10090 GN=Jakmip1 PE=1 SV=1	21	6	Jakmip1	1.07	0.940797	High	Peak Found	High	High	High	High	High	High	High	High
High	Master Protein	P17156	Heat shock-related 70 kDa protein 2 OS=Mus musculus OX=10090 GN=Hspa2 PE=1 SV=2	486	18	Hspa2	0.946	0.940797	High	High	High	High	High	High	High	High	High	High
[truncated: 2,418 more rows]
